# Supplementary material for: Identification of heme metabolism-related biomarkers in ovarian cancer and construction of a prognostic model via bulk RNA-Seq analysis
Source: Research Square preprint supplement (doi:10.21203/rs.3.rs-8411969/v1), 2026-01-08
Supplement: Supplementary file 1 [file 2d6734a75cd850d54471a2dc.xlsx]

## Sheet: Online Resource 5
ONTOLOGY	ID	Description	GeneRatio	BgRatio	pvalue	p.adjust	qvalue	geneID	Count
BP	GO:0042440	pigment metabolic process	14/96	80/18614	4.0165217680815e-18	7.78401918654194e-15	6.89996160579895e-15	ALAS1/FECH/ALAD/HMBS/ABCC2/BLVRB/SLCO1B1/UGT1A1/AMBP/HPX/ABCB6/CTNS/SLC7A11/TYR	14
BP	GO:0006778	porphyrin-containing compound metabolic process	11/96	53/18614	2.42725355300554e-15	2.35200869286237e-12	2.08488305184476e-12	ALAS1/FECH/ALAD/HMBS/ABCC2/BLVRB/SLCO1B1/UGT1A1/AMBP/HPX/ABCB6	11
BP	GO:0033013	tetrapyrrole metabolic process	11/96	62/18614	1.55847610296685e-14	1.00677556251658e-11	8.92432631593647e-12	ALAS1/FECH/ALAD/HMBS/ABCC2/BLVRB/SLCO1B1/UGT1A1/AMBP/HPX/ABCB6	11
BP	GO:0042168	heme metabolic process	10/96	46/18614	2.87830149293363e-14	1.39453707332634e-11	1.23615474643887e-11	ALAS1/FECH/ALAD/HMBS/ABCC2/BLVRB/SLCO1B1/AMBP/HPX/ABCB6	10
BP	GO:0015669	gas transport	7/96	22/18614	1.24396412612225e-11	4.82160495284984e-09	4.2739988501716e-09	HBA1/HBB/CA2/HBD/HBQ1/HBZ/RHAG	7
BP	GO:0015670	carbon dioxide transport	6/96	14/18614	4.66520195128854e-11	1.5068602302662e-08	1.33572097973735e-08	HBA1/HBB/CA2/HBD/HBZ/RHAG	6
BP	GO:0042744	hydrogen peroxide catabolic process	7/96	30/18614	1.4359529808632e-10	3.97553839558984e-08	3.52402295453947e-08	HBA1/HBB/HP/HBD/HBQ1/HBZ/SNCA	7
BP	GO:0009636	response to toxic substance	13/96	242/18614	3.41025794071669e-10	7.62601607477016e-08	6.75990344577964e-08	ALAD/FABP1/HBA1/HBB/HP/ABCB6/CLIC2/HBD/HBQ1/HBZ/HTRA2/MGST3/SLC7A11	13
BP	GO:0042743	hydrogen peroxide metabolic process	8/96	55/18614	3.71116872900388e-10	7.62601607477016e-08	6.75990344577964e-08	HBA1/HBB/HP/CTNS/HBD/HBQ1/HBZ/SNCA	8
BP	GO:1990748	cellular detoxification	10/96	115/18614	3.93499281463889e-10	7.62601607477016e-08	6.75990344577964e-08	FABP1/HBA1/HBB/HP/ABCB6/CLIC2/HBD/HBQ1/HBZ/MGST3	10
BP	GO:0097237	cellular response to toxic substance	10/96	124/18614	8.29334920127084e-10	1.46113734109663e-07	1.2951909948779e-07	FABP1/HBA1/HBB/HP/ABCB6/CLIC2/HBD/HBQ1/HBZ/MGST3	10
BP	GO:0098869	cellular oxidant detoxification	9/96	99/18614	2.08091927739499e-09	3.36068463299291e-07	2.97900022869177e-07	FABP1/HBA1/HBB/HP/CLIC2/HBD/HBQ1/HBZ/MGST3	9
BP	GO:0098754	detoxification	10/96	144/18614	3.58502426594101e-09	5.28549440707366e-07	4.68520279851405e-07	FABP1/HBA1/HBB/HP/ABCB6/CLIC2/HBD/HBQ1/HBZ/MGST3	10
BP	GO:0006787	porphyrin-containing compound catabolic process	5/96	13/18614	4.09093994355546e-09	5.28549440707366e-07	4.68520279851405e-07	ABCC2/BLVRB/SLCO1B1/UGT1A1/AMBP	5
BP	GO:0033015	tetrapyrrole catabolic process	5/96	13/18614	4.09093994355546e-09	5.28549440707366e-07	4.68520279851405e-07	ABCC2/BLVRB/SLCO1B1/UGT1A1/AMBP	5
BP	GO:0019755	one-carbon compound transport	7/96	55/18614	1.2889686817781e-08	1.56126331580372e-06	1.38394532148806e-06	HBA1/HBB/CA2/HBD/HBZ/RHAG/SLC4A1	7
BP	GO:0015671	oxygen transport	5/96	16/18614	1.37154606083713e-08	1.56356250935432e-06	1.38598338779331e-06	HBA1/HBB/HBD/HBQ1/HBZ	5
BP	GO:0046148	pigment biosynthetic process	7/96	57/18614	1.66532839813474e-08	1.79300357532507e-06	1.58936605014965e-06	ALAS1/FECH/ALAD/HMBS/CTNS/SLC7A11/TYR	7
BP	GO:0020027	hemoglobin metabolic process	5/96	18/18614	2.66847623259809e-08	2.72184575725005e-06	2.41271646072027e-06	ALAS1/FECH/HPX/EPB42/SLC25A37	5
BP	GO:0042167	heme catabolic process	4/96	11/18614	2.1323488593818e-07	1.87840549521906e-05	1.66506858301966e-05	ABCC2/BLVRB/SLCO1B1/AMBP	4
BP	GO:0046149	pigment catabolic process	4/96	11/18614	2.1323488593818e-07	1.87840549521906e-05	1.66506858301966e-05	ABCC2/BLVRB/SLCO1B1/AMBP	4
BP	GO:0046501	protoporphyrinogen IX metabolic process	4/96	11/18614	2.1323488593818e-07	1.87840549521906e-05	1.66506858301966e-05	ALAS1/FECH/ALAD/HMBS	4
BP	GO:0002262	myeloid cell homeostasis	9/96	171/18614	2.46733343510971e-07	2.07899660749679e-05	1.84287787922153e-05	ALAS1/FECH/EPB42/FOXO3/RHAG/SLC4A1/SLC7A11/TRIM10/TSPO2	9
BP	GO:0015711	organic anion transport	13/96	433/18614	3.41657064046789e-07	2.75888079217782e-05	2.44554530054544e-05	ABCC2/SLCO1B1/FABP1/CTNS/RHAG/SLC2A1/SLC4A1/SLC6A8/SLC7A11/SNCA/TSPO2/UCP2/XK	13
BP	GO:0030218	erythrocyte differentiation	8/96	130/18614	3.60994101766333e-07	2.79842627689261e-05	2.4805994698217e-05	ALAS1/FECH/EPB42/FOXO3/RHAG/SLC4A1/TRIM10/TSPO2	8
BP	GO:0055072	iron ion homeostasis	7/96	89/18614	3.7957005131042e-07	2.82925676707536e-05	2.50792843618869e-05	FECH/HPX/ABCB6/EPB42/GLRX5/RHAG/SLC25A37	7
BP	GO:0034101	erythrocyte homeostasis	8/96	139/18614	6.02436967750486e-07	4.32415867963127e-05	3.83304924510251e-05	ALAS1/FECH/EPB42/FOXO3/RHAG/SLC4A1/TRIM10/TSPO2	8
BP	GO:0006779	porphyrin-containing compound biosynthetic process	5/96	35/18614	9.43350547131755e-07	6.30418400117704e-05	5.58819634453366e-05	ALAS1/FECH/ALAD/HMBS/ABCB6	5
BP	GO:0033014	tetrapyrrole biosynthetic process	5/96	35/18614	9.43350547131755e-07	6.30418400117704e-05	5.58819634453366e-05	ALAS1/FECH/ALAD/HMBS/ABCB6	5
BP	GO:0046942	carboxylic acid transport	11/96	352/18614	1.98801230833407e-06	0.000127739926569154	0.000113232067872935	ABCC2/SLCO1B1/FABP1/CTNS/SLC2A1/SLC6A8/SLC7A11/SNCA/TSPO2/UCP2/XK	11
BP	GO:0015849	organic acid transport	11/96	353/18614	2.04331151890804e-06	0.000127739926569154	0.000113232067872935	ABCC2/SLCO1B1/FABP1/CTNS/SLC2A1/SLC6A8/SLC7A11/SNCA/TSPO2/UCP2/XK	11
BP	GO:0006979	response to oxidative stress	12/96	434/18614	2.36137649198064e-06	0.000143010863795577	0.000126768632727382	ALAD/FABP1/HBA1/HBB/HP/FOXO3/GCLC/GCLM/HTRA2/SLC7A11/SNCA/UCP2	12
BP	GO:0009064	glutamine family amino acid metabolic process	6/96	79/18614	3.29781057246243e-06	0.000193671420891884	0.000171675497743499	FTCD/GCLC/GCLM/GMPS/SLC7A11/UCP2	6
BP	GO:0072593	reactive oxygen species metabolic process	9/96	237/18614	3.74336066595314e-06	0.000213371557959329	0.000189138223121843	HBA1/HBB/HP/CTNS/HBD/HBQ1/HBZ/SNCA/UCP2	9
BP	GO:0006783	heme biosynthetic process	4/96	31/18614	1.87854673501641e-05	0.00104017816356052	0.000922041585427604	ALAS1/FECH/ALAD/HMBS	4
BP	GO:0006536	glutamate metabolic process	4/96	34/18614	2.73616599663244e-05	0.00143759252369974	0.00127432024261472	FTCD/GCLC/GCLM/SLC7A11	4
BP	GO:0048872	homeostasis of number of cells	9/96	304/18614	2.74462968921002e-05	0.00143759252369974	0.00127432024261472	ALAS1/FECH/EPB42/FOXO3/RHAG/SLC4A1/SLC7A11/TRIM10/TSPO2	9
BP	GO:0072488	ammonium transmembrane transport	3/96	12/18614	2.82769268493375e-05	0.00144212326931621	0.00127833641601437	RHAG/RHCE/RHD	3
BP	GO:0006534	cysteine metabolic process	3/96	13/18614	3.66224953763674e-05	0.00181985630870257	0.00161316902710477	GCLC/GCLM/SLC7A11	3
BP	GO:0042541	hemoglobin biosynthetic process	3/96	14/18614	4.64361279272935e-05	0.00223463464862021	0.00198083957772429	ALAS1/FECH/SLC25A37	3
BP	GO:0048821	erythrocyte development	4/96	39/18614	4.75794584392772e-05	0.00223463464862021	0.00198083957772429	ALAS1/EPB42/RHAG/SLC4A1	4
BP	GO:1901214	regulation of neuron death	9/96	327/18614	4.84286146759798e-05	0.00223463464862021	0.00198083957772429	BTG2/FOXO3/GCLC/GCLM/HDGF/HTRA2/NR3C1/SLC7A11/SNCA	9
BP	GO:0030099	myeloid cell differentiation	10/96	421/18614	6.27673029266532e-05	0.00282890774585707	0.00250761905449934	ALAS1/FECH/EPB42/FOXO3/NR3C1/RHAG/SLC4A1/TRIM10/TSPO2/UCP2	10
BP	GO:0006750	glutathione biosynthetic process	3/96	16/18614	7.0906999057425e-05	0.0031231310039384	0.00276842637468224	GCLC/GCLM/SLC7A11	3
BP	GO:0019184	nonribosomal peptide biosynthetic process	3/96	17/18614	8.57795452457682e-05	0.00369423908191775	0.00327467176236476	GCLC/GCLM/SLC7A11	3
BP	GO:1901605	alpha-amino acid metabolic process	7/96	206/18614	9.51806181245923e-05	0.00401000082446652	0.00355457136794816	FTCD/GCLC/GCLM/GMPS/SLC7A11/TYR/UCP2	7
BP	GO:0097067	cellular response to thyroid hormone stimulus	3/96	18/18614	0.000102550806235443	0.00422858430817636	0.00374832958065494	CTSB/GCLC/GCLM	3
BP	GO:0046189	phenol-containing compound biosynthetic process	4/96	48/18614	0.00010863325064519	0.00438606749479954	0.00388792686519627	CTNS/SLC7A11/SNCA/TYR	4
BP	GO:0006865	amino acid transport	6/96	147/18614	0.000113195598095955	0.00447700141040736	0.00396853310617827	CTNS/SLC7A11/SNCA/TSPO2/UCP2/XK	6
BP	GO:0006520	amino acid metabolic process	8/96	290/18614	0.000127657177757152	0.00494799220986722	0.00438603187578258	CTNS/FTCD/GCLC/GCLM/GMPS/SLC7A11/TYR/UCP2	8
BP	GO:0070997	neuron death	9/96	373/18614	0.000132220704372676	0.0050243867661617	0.00445375004202699	BTG2/FOXO3/GCLC/GCLM/HDGF/HTRA2/NR3C1/SLC7A11/SNCA	9
BP	GO:0043523	regulation of neuron apoptotic process	7/96	219/18614	0.000139224448144576	0.00509088642460734	0.00451269710768518	BTG2/FOXO3/GCLC/GCLM/HDGF/NR3C1/SNCA	7
BP	GO:1901215	negative regulation of neuron death	7/96	219/18614	0.000139224448144576	0.00509088642460734	0.00451269710768518	BTG2/GCLC/GCLM/HDGF/HTRA2/SLC7A11/SNCA	7
BP	GO:0010310	regulation of hydrogen peroxide metabolic process	3/96	20/18614	0.000142201113012513	0.00510343994478242	0.00452382488180159	HP/CTNS/SNCA	3
BP	GO:0006749	glutathione metabolic process	4/96	57/18614	0.000212851570899939	0.00750011535280148	0.00664830169777417	CTNS/GCLC/GCLM/SLC7A11	4
BP	GO:0010876	lipid localization	10/96	497/18614	0.000243339647261097	0.00842128993557154	0.00746485534455095	ABCC2/SLCO1B1/FABP1/APOA1/APOL1/LRP1/C3/SLC2A1/SLC4A1/TSPO2	10
BP	GO:0042438	melanin biosynthetic process	3/96	24/18614	0.000248720315832828	0.00845649073831614	0.00749605827219159	CTNS/SLC7A11/TYR	3
BP	GO:0018958	phenol-containing compound metabolic process	5/96	111/18614	0.00027350090629809	0.00913870269664999	0.00810078909398337	CTNS/CTSB/SLC7A11/SNCA/TYR	5
BP	GO:0006582	melanin metabolic process	3/96	25/18614	0.000281582142806268	0.00924925750438216	0.00819878781551881	CTNS/SLC7A11/TYR	3
BP	GO:0015718	monocarboxylic acid transport	6/96	177/18614	0.000310255576438884	0.00991264548524039	0.00878683256309398	ABCC2/SLCO1B1/FABP1/SLC2A1/SLC6A8/TSPO2	6
BP	GO:0062012	regulation of small molecule metabolic process	8/96	331/18614	0.000313341686329004	0.00991264548524039	0.00878683256309398	FABP1/APOA1/ADIPOR1/KAT2B/NR3C1/SLC4A1/SLC7A11/SNCA	8
BP	GO:0044550	secondary metabolite biosynthetic process	3/96	26/18614	0.000317122817381272	0.00991264548524039	0.00878683256309398	CTNS/SLC7A11/TYR	3
BP	GO:0015698	inorganic anion transport	6/96	179/18614	0.000329487579590413	0.0101356655435908	0.00898452347354309	ABCC2/APOL1/CA2/CLIC2/SLC4A1/UCP2	6
BP	GO:0051402	neuron apoptotic process	7/96	259/18614	0.000387121779547714	0.0117225313869292	0.0103911635562807	BTG2/FOXO3/GCLC/GCLM/HDGF/NR3C1/SNCA	7
BP	GO:0051881	regulation of mitochondrial membrane potential	4/96	70/18614	0.000469442162623973	0.0139965986333117	0.0124069572372846	CTNS/GCLC/GCLM/UCP2	4
BP	GO:0097066	response to thyroid hormone	3/96	30/18614	0.000487855436796636	0.0143252096441194	0.0126982467759507	CTSB/GCLC/GCLM	3
BP	GO:0006869	lipid transport	9/96	447/18614	0.000501501006369813	0.014506103736488	0.0128585961099063	ABCC2/SLCO1B1/FABP1/APOA1/APOL1/LRP1/SLC2A1/SLC4A1/TSPO2	9
BP	GO:0000096	sulfur amino acid metabolic process	3/96	33/18614	0.000648300545492699	0.0184765655465419	0.0163781190440261	GCLC/GCLM/SLC7A11	3
BP	GO:0051354	negative regulation of oxidoreductase activity	3/96	35/18614	0.000771918367691482	0.0216808376316825	0.0192184710308543	HP/SLC4A1/SNCA	3
BP	GO:0061515	myeloid cell development	4/96	84/18614	0.000935052913467421	0.0258876078042837	0.0229474639816366	ALAS1/EPB42/RHAG/SLC4A1	4
BP	GO:0009069	serine family amino acid metabolic process	3/96	40/18614	0.00114373153848568	0.030197510282985	0.0267678761511224	GCLC/GCLM/SLC7A11	3
BP	GO:0010675	regulation of cellular carbohydrate metabolic process	5/96	152/18614	0.00114388386942803	0.030197510282985	0.0267678761511224	ADIPOR1/KAT2B/NR3C1/SLC4A1/SNCA	5
BP	GO:0015886	heme transport	2/96	10/18614	0.00115305250822543	0.030197510282985	0.0267678761511224	HPX/ABCB6	2
BP	GO:0051409	response to nitrosative stress	2/96	10/18614	0.00115305250822543	0.030197510282985	0.0267678761511224	GCLC/GCLM	2
BP	GO:0043524	negative regulation of neuron apoptotic process	5/96	155/18614	0.00124775554402968	0.0322420032577269	0.0285801690927219	BTG2/GCLC/GCLM/HDGF/SNCA	5
BP	GO:0007584	response to nutrient	5/96	156/18614	0.00128388206993371	0.0327389927833097	0.0290207138245404	ALAD/UGT1A1/GCLC/GCLM/TYR	5
BP	GO:0006835	dicarboxylic acid transport	4/96	94/18614	0.00142100920067091	0.03568323445966	0.0316305679420809	ABCC2/SLC7A11/SNCA/UCP2	4
BP	GO:1905039	carboxylic acid transmembrane transport	5/96	160/18614	0.00143616733119374	0.03568323445966	0.0316305679420809	SLC2A1/SLC6A8/SLC7A11/TSPO2/UCP2	5
BP	GO:1903825	organic acid transmembrane transport	5/96	161/18614	0.0014762336427823	0.0357966077890673	0.0317310650761816	SLC2A1/SLC6A8/SLC7A11/TSPO2/UCP2	5
BP	GO:0043648	dicarboxylic acid metabolic process	4/96	95/18614	0.00147767214815551	0.0357966077890673	0.0317310650761816	FTCD/GCLC/GCLM/SLC7A11	4
BP	GO:0045807	positive regulation of endocytosis	4/96	96/18614	0.00153589212708631	0.0367476412628798	0.0325740864380098	LRP1/C3/SNCA/SYNJ1	4
BP	GO:0071372	cellular response to follicle-stimulating hormone stimulus	2/96	12/18614	0.00167981166876222	0.0397009148056241	0.0351919466421045	GCLC/GCLM	2
BP	GO:0006953	acute-phase response	3/96	48/18614	0.0019434796297524	0.0430820123620095	0.0381890414289281	UGT1A1/CD163/HP	3
BP	GO:0031648	protein destabilization	3/96	48/18614	0.0019434796297524	0.0430820123620095	0.0381890414289281	BTRC/RAD23A/SNCA	3
BP	GO:0009410	response to xenobiotic stimulus	8/96	440/18614	0.00197635880561201	0.0430820123620095	0.0381890414289281	ALAD/ABCC2/SLCO1B1/UGT1A1/GCLC/GCLM/SMOX/SNCA	8
BP	GO:0000101	sulfur amino acid transport	2/96	13/18614	0.00197857333665056	0.0430820123620095	0.0381890414289281	CTNS/SLC7A11	2
BP	GO:0010642	negative regulation of platelet-derived growth factor receptor signaling pathway	2/96	13/18614	0.00197857333665056	0.0430820123620095	0.0381890414289281	LRP1/SNCA	2
BP	GO:0072537	fibroblast activation	2/96	13/18614	0.00197857333665056	0.0430820123620095	0.0381890414289281	GCLC/GCLM	2
BP	GO:1901678	iron coordination entity transport	2/96	13/18614	0.00197857333665056	0.0430820123620095	0.0381890414289281	HPX/ABCB6	2
BP	GO:0048732	gland development	8/96	441/18614	0.00200446827898183	0.0430820123620095	0.0381890414289281	UGT1A1/APOA1/BTRC/IGSF3/NR3C1/RAP1GAP/TYR/UCP2	8
BP	GO:0019216	regulation of lipid metabolic process	7/96	344/18614	0.00202294278892821	0.0430820123620095	0.0381890414289281	FABP1/UGT1A1/APOA1/ADIPOR1/C3/NR3C1/SNCA	7
BP	GO:0072337	modified amino acid transport	3/96	49/18614	0.00206254410886539	0.0434479400324035	0.0385134094470059	CTNS/SLC6A8/SLC7A11	3
BP	GO:0042762	regulation of sulfur metabolic process	2/96	14/18614	0.0023005962047711	0.0479414563961977	0.0424965818470451	SLC7A11/SNCA	2
CC	GO:0031838	haptoglobin-hemoglobin complex	6/99	11/19518	6.61044675634335e-12	9.29748251391086e-10	8.13271265115998e-10	HBA1/HBB/HP/HBD/HBQ1/HBZ	6
CC	GO:0072562	blood microparticle	12/99	144/19518	8.73003052949377e-12	9.29748251391086e-10	8.13271265115998e-10	AMBP/APOA1/APOL1/HBA1/HBB/HP/HPX/IGHA1/C3/HBD/SLC2A1/SLC4A1	12
CC	GO:0005833	hemoglobin complex	5/99	12/19518	2.33438762130621e-09	1.65741521112741e-07	1.44977757533754e-07	HBA1/HBB/HBD/HBQ1/HBZ	5
CC	GO:0071682	endocytic vesicle lumen	5/99	23/19518	9.48899343007675e-08	5.05288900151587e-06	4.41987325558838e-06	APOA1/HBA1/HBB/HP/HPX	5
CC	GO:0042470	melanosome	6/99	112/19518	2.26614165665172e-05	0.000804480288111361	0.000703696619697113	ABCB6/ATP6V0A1/CTNS/CTSB/SLC2A1/TYR	6
CC	GO:0048770	pigment granule	6/99	112/19518	2.26614165665172e-05	0.000804480288111361	0.000703696619697113	ABCB6/ATP6V0A1/CTNS/CTSB/SLC2A1/TYR	6
CC	GO:0030139	endocytic vesicle	9/99	347/19518	6.79103431699224e-05	0.00206641472788478	0.0018075384573047	APOA1/CD163/HBA1/HBB/HP/HPX/LRP1/ATP6V0A1/GAPVD1	9
CC	GO:0033162	melanosome membrane	3/99	21/19518	0.000157543841170097	0.00335568381692306	0.00293529051443233	ABCB6/CTNS/TYR	3
CC	GO:0045009	chitosome	3/99	21/19518	0.000157543841170097	0.00335568381692306	0.00293529051443233	ABCB6/CTNS/TYR	3
CC	GO:0090741	pigment granule membrane	3/99	21/19518	0.000157543841170097	0.00335568381692306	0.00293529051443233	ABCB6/CTNS/TYR	3
CC	GO:0030863	cortical cytoskeleton	4/99	104/19518	0.00194295544788991	0.0376226827636864	0.0329093889259822	EPB42/GYPC/SLC2A1/SLC4A1	4
MF	GO:0016209	antioxidant activity	9/100	82/18369	6.14181994896057e-10	1.7747940099488e-07	1.5035397334164e-07	FABP1/HBA1/HBB/HP/CLIC2/HBD/HBQ1/HBZ/MGST3	9
MF	GO:0031720	haptoglobin binding	5/100	10/18369	1.0659423483176e-09	1.7747940099488e-07	1.5035397334164e-07	HBA1/HBB/HBD/HBQ1/HBZ	5
MF	GO:0005344	oxygen carrier activity	5/100	14/18369	8.32330717961662e-09	9.23887096937445e-07	7.82682920749914e-07	HBA1/HBB/HBD/HBQ1/HBZ	5
MF	GO:0004601	peroxidase activity	7/100	55/18369	1.87696699095509e-08	1.56257501997011e-06	1.32375566730517e-06	HBA1/HBB/CLIC2/HBD/HBQ1/HBZ/MGST3	7
MF	GO:0016684	oxidoreductase activity, acting on peroxide as acceptor	7/100	57/18369	2.4238181362039e-08	1.6142628787118e-06	1.36754370632136e-06	HBA1/HBB/CLIC2/HBD/HBQ1/HBZ/MGST3	7
MF	GO:0020037	heme binding	9/100	137/18369	5.87088399682423e-08	3.25834061823745e-06	2.76034545815595e-06	FECH/AMBP/HBA1/HBB/ABCB6/BACH1/HBD/HBQ1/HBZ	9
MF	GO:0046906	tetrapyrrole binding	9/100	147/18369	1.07830598185017e-07	5.12965559937294e-06	4.34565418249391e-06	FECH/AMBP/HBA1/HBB/ABCB6/BACH1/HBD/HBQ1/HBZ	9
MF	GO:0043177	organic acid binding	10/100	212/18369	2.37696446729835e-07	9.89411459512936e-06	8.38192733205206e-06	FABP1/UGT1A1/AMBP/HBA1/HBB/FTCD/GCLC/HBD/HBQ1/HBZ	10
MF	GO:0019825	oxygen binding	5/100	39/18369	2.14902610337184e-06	7.95139658247579e-05	6.73612860472107e-05	HBA1/HBB/HBD/HBQ1/HBZ	5
MF	GO:0008514	organic anion transmembrane transporter activity	9/100	230/18369	4.58039907423562e-06	0.000152527289172046	0.000129215468620542	ABCC2/SLCO1B1/CTNS/SLC2A1/SLC4A1/SLC6A8/SLC7A11/TSPO2/UCP2	9
MF	GO:0046943	carboxylic acid transmembrane transporter activity	7/100	162/18369	2.93341303576136e-05	0.000846795600667414	0.000717373861162848	ABCC2/SLCO1B1/CTNS/SLC6A8/SLC7A11/TSPO2/UCP2	7
MF	GO:0005342	organic acid transmembrane transporter activity	7/100	163/18369	3.05151567808077e-05	0.000846795600667414	0.000717373861162848	ABCC2/SLCO1B1/CTNS/SLC6A8/SLC7A11/TSPO2/UCP2	7
MF	GO:0008519	ammonium transmembrane transporter activity	3/100	12/18369	3.32352360932207e-05	0.000851333355310962	0.000721218078784062	RHAG/RHCE/RHD	3
MF	GO:0140104	molecular carrier activity	5/100	88/18369	0.000118444781247383	0.00281729372538418	0.00238670687024802	HBA1/HBB/HBD/HBQ1/HBZ	5
MF	GO:1901682	sulfur compound transmembrane transporter activity	4/100	57/18369	0.000261768071017801	0.00581125117659518	0.00492307670405408	ABCC2/CTNS/SLC7A11/UCP2	4
MF	GO:0051537	2 iron, 2 sulfur cluster binding	3/100	25/18369	0.000330043400372205	0.00686902827024652	0.00581918626972046	FECH/GLRX5/ISCA1	3
MF	GO:0022804	active transmembrane transporter activity	9/100	428/18369	0.000544877100535019	0.0106731808516565	0.00904192340206718	ABCC2/SLCO1B1/ABCB6/ATP6V0A1/CTNS/SLC4A1/SLC6A8/SLC7A11/UCP2	9
MF	GO:0016829	lyase activity	6/100	198/18369	0.000748197127320157	0.0138416468554229	0.0117261304164797	FECH/ALAD/CA1/CA2/FTCD/MGST3	6
MF	GO:0072349	modified amino acid transmembrane transporter activity	3/100	35/18369	0.000902856858669546	0.0158237544177347	0.0134052985109938	CTNS/SLC6A8/SLC7A11	3
MF	GO:0015103	inorganic anion transmembrane transporter activity	5/100	141/18369	0.00104173148513898	0.0173337564427251	0.0146845162846541	ABCC2/APOL1/CLIC2/SLC4A1/UCP2	5
MF	GO:0015171	amino acid transmembrane transporter activity	4/100	83/18369	0.00109311977566735	0.0173337564427251	0.0146845162846541	CTNS/SLC7A11/TSPO2/UCP2	4
MF	GO:0005506	iron ion binding	5/100	152/18369	0.00145468197692099	0.0220185953779405	0.0186533382686519	FECH/HBA1/HBQ1/HBZ/SNCA	5
MF	GO:0000099	sulfur amino acid transmembrane transporter activity	2/100	12/18369	0.00186889223076442	0.027058309254111	0.0229227971553714	CTNS/SLC7A11	2
MF	GO:0005496	steroid binding	4/100	99/18369	0.00209572457833141	0.0290781785243483	0.0246339555698604	UGT1A1/APOA1/NR3C1/TSPO2	4
MF	GO:0016879	ligase activity, forming carbon-nitrogen bonds	3/100	48/18369	0.00226694187382236	0.0301956657593139	0.0255806493551323	GCLC/GCLM/GMPS	3
MF	GO:0015291	secondary active transmembrane transporter activity	6/100	255/18369	0.00271153934408968	0.0347285615993025	0.0294207507779771	SLCO1B1/CTNS/SLC4A1/SLC6A8/SLC7A11/UCP2	6
MF	GO:0004089	carbonate dehydratase activity	2/100	15/18369	0.00294176322438556	0.0362817464340885	0.0307365514282779	CA1/CA2	2
MF	GO:0005324	long-chain fatty acid transporter activity	2/100	17/18369	0.00378337361742266	0.0449951219500623	0.0381182003559877	FABP1/SLC2A1	2
MF	GO:0015172	acidic amino acid transmembrane transporter activity	2/100	18/18369	0.00424124794986159	0.0487012264587555	0.0412578747935719	SLC7A11/UCP2	2
MF	GO:0016836	hydro-lyase activity	3/100	62/18369	0.00469212329552972	0.0494631780798403	0.041903371978496	ALAD/CA1/CA2	3
MF	GO:0030506	ankyrin binding	2/100	19/18369	0.00472346704168906	0.0494631780798403	0.041903371978496	RHAG/SLC4A1	2
MF	GO:0031406	carboxylic acid binding	5/100	200/18369	0.00475321831397865	0.0494631780798403	0.041903371978496	FABP1/UGT1A1/AMBP/FTCD/GCLC	5
