# Supplementary material for: Identification of heme metabolism-related biomarkers in ovarian cancer and construction of a prognostic model via bulk RNA-Seq analysis
Source: Research Square preprint supplement (doi:10.21203/rs.3.rs-8411969/v1), 2026-01-08
Supplement: Supplementary file 2 [file 43e7ab52a392168526f6b9dd.docx]

| primer | sequence | |
| --- | --- | --- |
| EPB42 F | TCAGGGTGCTCACAGGAGTA | |
| EPB42 R | GCTCCTTCTGGGCTTTCTGT | |
| SLC7A11 F | ATACTCTGCAGCTTTCCCCG |
| SLC7A11 R | CCAGACAGCAGTGCTCAAGA |
| HMBS F | CTACTTTCCAAGCGGAGCCA |
| HMBS R | CCCTGTGGTGGACATAGCAA |
| GLRX5 F | CAGATGCACCAGAATGGGGA |
| GLRX5 R | CTTAGCCCGAACACCAGACC |
| internal reference-GAPDH F | ATGGGCAGCCGTTAGGAAAG |
| internal reference-GAPDH R | AGGAAAAGCATCACCCGGAG |
