# Supplementary material for: Identification of heme metabolism-related biomarkers in ovarian cancer and construction of a prognostic model via bulk RNA-Seq analysis
Source: Research Square preprint supplement (doi:10.21203/rs.3.rs-8411969/v1), 2026-01-08
Supplement: Supplementary file 3 [file 665a567b72fd8378503242c8.xlsx]

## Sheet: Online Resource 6
category	subcategory	ID	Description	GeneRatio	BgRatio	pvalue	p.adjust	qvalue	geneID	Count
Metabolism	Metabolism of cofactors and vitamins	hsa00860	Porphyrin metabolism	6/58	46/9397	3.2827660390388e-07	5.28525332285247e-05	4.90687134256326e-05	ALAS1/FECH/ALAD/HMBS/BLVRB/UGT1A1	6
Metabolism	Global and overview maps	hsa01240	Biosynthesis of cofactors	7/58	154/9397	4.13301647618486e-05	0.00332707826332881	0.00308888599799079	ALAS1/FECH/ALAD/HMBS/UGT1A1/GCLC/GCLM	7
Human Diseases	Infectious disease: parasitic	hsa05143	African trypanosomiasis	4/58	37/9397	7.41414132675785e-05	0.00397892251202671	0.00369406339789338	APOA1/APOL1/HBA1/HBB	4
Organismal Systems	Digestive system	hsa04976	Bile secretion	5/58	90/9397	0.000221343621544752	0.00716834536115524	0.00665514901133733	ABCC2/SLCO1B1/UGT1A1/CA2/SLC2A1	5
Human Diseases	Infectious disease: parasitic	hsa05144	Malaria	4/58	50/9397	0.000243556497597138	0.00716834536115524	0.00665514901133733	HBA1/HBB/LRP1/GYPC	4
Metabolism	Global and overview maps	hsa01100	Metabolic pathways	21/58	1572/9397	0.000267143305384667	0.00716834536115524	0.00665514901133733	ALAS1/FECH/ALAD/HMBS/BLVRB/UGT1A1/AGPAT4/ATP6V0A1/CA1/CA2/EZH1/FTCD/GCLC/GCLM/GMPS/MGST3/PGLS/SELENBP1/SMOX/SYNJ1/TYR	21
Organismal Systems	Excretory system	hsa04966	Collecting duct acid secretion	3/58	28/9397	0.000655159204029335	0.0150686616926747	0.0139898657101001	ATP6V0A1/CA2/SLC4A1	3
Cellular Processes	Cell growth and death	hsa04216	Ferroptosis	3/58	42/9397	0.00215958050159824	0.0434615575946647	0.0403500567403882	GCLC/GCLM/SLC7A11	3
