# Supplementary material for: Identification of heme metabolism-related biomarkers in ovarian cancer and construction of a prognostic model via bulk RNA-Seq analysis
Source: Research Square preprint supplement (doi:10.21203/rs.3.rs-8411969/v1), 2026-01-08
Supplement: Supplementary file 4 [file 66a9b09026178ecc152f745d.xlsx]

## Sheet: Sheet1
Genes
COX10	CD163	IGKV1-5	IGLV3-27	BTRC	EZH1	ICAM4	NFE2	SELENBP1	TRAK2
COX15	HBA1	IGKV1D-12	IGLV6-57	C3	FBXO34	IGSF3	NFE2L1	SIDT2	TRIM10
ALAS1	HBA2	IGKV1D-16	IGLV7-43	CA1	FBXO7	ISCA1	NNT	SLC10A3	TRIM58
FECH	HBB	IGKV1D-33	JCHAIN	CA2	FBXO9	KAT2B	NR3C1	SLC11A2	TSPAN5
CPOX	HP	IGKV1D-39	LRP1	CAST	FN3K	KDM7A	NUDT4	SLC22A4	TSPO2
ABCG2	HPR	IGKV2-28	ABCB6	CAT	FOXJ2	KEL	OPTN	SLC25A37	TYR
UROD	HPX	IGKV2-30	ACKR1	CCDC28A	FOXO3	KHNYN	OSBP2	SLC25A38	UBAC1
PPOX	IGHA1	IGKV2D-28	ACP5	CCND3	FTCD	KLF1	P4HA2	SLC2A1	UCP2
ALAD	IGHA2	IGKV2D-30	ACSL6	CDC27	GAPVD1	KLF3	PC	SLC30A1	USP15
ALAS2	IGHV1-2	IGKV2D-40	ADD1	CDR2	GATA1	LAMP2	PDZK1IP1	SLC30A10	VEZF1
FLVCR1	IGHV1-46	IGKV3-11	ADD2	CIR1	GCLC	LMO2	PGLS	SLC4A1	XK
ALB	IGHV1-69	IGKV3-15	ADIPOR1	CLCN3	GCLM	LPIN2	PICALM	SLC66A2	XPO7
UROS	IGHV2-5	IGKV3-20	AGPAT4	CLIC2	GDE1	LRP10	PIGQ	SLC6A8	YPEL5
HMBS	IGHV2-70	IGKV3D-20	AHSP	CROCCP2	GLRX5	MAP2K3	PPP2R5B	SLC6A9
ABCC2	IGHV3-11	IGKV4-1	ALDH1L1	CTNS	GMPS	MARCHF2	PRDX2	SLC7A11
BLVRB	IGHV3-13	IGKV5-2	ALDH6A1	CTSB	GYPA	MARCHF8	PSMD9	SMOX
HMOX1	IGHV3-23	IGLC2	ANK1	CTSE	GYPB	MARK3	RAD23A	SNCA
ABCC1	IGHV3-30	IGLC3	AQP3	DAAM1	GYPC	MBOAT2	RANBP10	SPTA1
HMOX2	IGHV3-33	IGLV1-40	ARHGEF12	DCAF10	GYPE	MFHAS1	RAP1GAP	SPTB
BLVRA	IGHV3-48	IGLV1-44	ARL2BP	DCAF11	H1-0	MGST3	RBM38	SYNJ1
SLCO1B3	IGHV3-53	IGLV1-47	ASNS	DCUN1D1	H4C3	MINPP1	RBM5	TAL1
SLCO1B1	IGHV3-7	IGLV1-51	ATG4A	DMTN	HAGH	MKRN1	RCL1	TCEA1
SLCO2B1	IGHV4-34	IGLV2-11	ATP6V0A1	E2F2	HBBP1	MOCOS	RHAG	TENT5C
FABP1	IGHV4-39	IGLV2-14	BACH1	EIF2AK1	HBD	MOSPD1	RHCE	TFDP2
UGT1A1	IGHV4-59	IGLV2-23	BCAM	ELL2	HBQ1	MPP1	RHD	TFRC
GSTA1	IGKV1-12	IGLV2-8	BMP2K	ENDOD1	HBZ	MXI1	RIOK3	TMCC2
UGT1A4	IGKV1-16	IGLV3-1	BNIP3L	EPB41	HDGF	MYL4	RNF123	TMEM9B
AMBP	IGKV1-17	IGLV3-19	BPGM	EPB42	HEBP1	NARF	RNF19A	TNRC6B
APOA1	IGKV1-33	IGLV3-21	BSG	EPOR	HTATIP2	NCOA4	SDCBP	TNS1
APOL1	IGKV1-39	IGLV3-25	BTG2	ERMAP	HTRA2	NEK7	SEC14L1	TOP1
