# Supplementary material for: Identification of heme metabolism-related biomarkers in ovarian cancer and construction of a prognostic model via bulk RNA-Seq analysis
Source: Research Square preprint supplement (doi:10.21203/rs.3.rs-8411969/v1), 2026-01-08
Supplement: Supplementary file 5 [file 756aa2361c03d1163934ece0.xlsx]

## Sheet: Online Resource 3
Gene	log2FC	AveExpr	t	P_Value	Padj	B	Significant	size_value
LINC00550	-7.85269	4.278946356416635	-36.9129	1.5942567023905736e-45	1.2158333031331309e-41	92.14577822415563	Down	40.91512596494166
LINC01105	-4.51881	5.334021722374203	-31.398	3.607303179923734e-41	2.063287236336878e-37	82.76297776201301	Down	36.68544030839494
BNC1	-4.77459	7.208250490449499	-30.8461	1.070654938898855e-40	4.899102869413381e-37	81.73243178163816	Down	36.30988344130514
ITLN1	-5.57378	7.758926834332066	-27.6687	7.967142554958815e-38	2.025336161276697e-34	75.42395388817768	Down	33.69350288313029
RP11-489G11.3	-8.64249	3.929252116315508	-24.9078	4.29078843108034e-35	9.81689485146871e-32	69.36133591238946	Down	31.00802586069855
TNFRSF8	-2.63401	5.95725306494461	-24.3367	1.6915633517288235e-34	2.764376994585982e-31	68.0318877737232	Down	30.55840272992892
LHX9	-3.97696	5.905866005169441	-23.8904	5.0330568338707935e-34	7.676753820141994e-31	66.97350816706381	Down	30.1148223862224
FITM1	-2.29315	6.136955273112297	-21.6787	1.4344227159706655e-31	1.8232309621496033e-28	61.46542180153552	Down	27.739158312566303
LOC101927247	-3.05321	5.102162710670594	-20.9764	9.469599936235484e-31	1.1402893523217455e-27	59.61901035519711	Down	26.942984930969264
RNF2	-2.43062	5.497206195357653	-20.8396	1.3753122498348724e-30	1.5732884481986023e-27	59.25352461856921	Down	26.803191646113795
LRRC37A7P	-7.04185	2.4155295843971984	-20.3408	5.4465016855472766e-30	5.933833907792198e-27	57.904520947795824	Down	26.226664614058755
HAS1	-3.77304	6.524165155444939	-20.2841	6.378175362749165e-30	6.633012460197189e-27	57.749636639232314	Down	26.17828918687322
FCAMR	-3.21828	4.573427692843445	-20.116	1.0208915032033669e-29	9.732073625745764e-27	57.28813877823462	Down	26.01179461417462
CCDC60	-4.03122	6.821433131931947	-19.8292	2.2924987597785163e-29	2.098003164998907e-26	56.49400912022598	Down	25.678193860975387
PDE8B	-2.88923	6.710442583044501	-19.6202	4.1558600847438783e-29	3.521552699216859e-26	55.90969654905936	Down	25.453265808107137
RP11-550I24.2	-2.60996	4.819451401290358	-19.4593	6.589964588883592e-29	5.38470713675242e-26	55.456658432425904	Down	25.268837912115504
CNPY1	-2.34114	4.493296674080925	-19.4069	7.663003633566903e-29	6.045581383875075e-26	55.30838018157655	Down	25.21856192810879
GADL1	-3.23828	5.461888478991473	-19.3847	8.168259010015013e-29	6.229386596337783e-26	55.245614082850246	Down	25.205554715931722
ABCA8	-5.04167	6.61281033315891	-19.1443	1.6380281150428727e-28	1.2089175885182542e-25	54.56141593527081	Down	24.917603303830433
ZBTB8B	-2.02762	5.4842407956794	-18.8051	4.418381013279266e-28	3.0632769455398884e-25	53.58507169115578	Down	24.51381373760981
FOXP1-IT1	-3.14265	5.724135696446838	-18.496	1.1034001124764011e-27	7.212768906670739e-25	52.68391528936787	Down	24.141897982154237
PEX5L	-3.99295	5.896825979021283	-18.3941	1.4952160501362638e-27	9.502513336407662e-25	52.384573252709785	Down	24.022161512209028
HBB	-4.66427	8.522052936855948	-17.4208	2.89272942619718e-26	1.5391338730689598e-23	49.4629474636395	Down	22.812723603815993
GFPT2	-3.03932	7.149098314554471	-17.0643	8.796533893818743e-26	4.573997703560887e-23	48.36468618917033	Down	22.339704057772796
SYT4	-3.31898	6.665652149961696	-17.0481	9.255177048569964e-26	4.7055376820940494e-23	48.31447804309448	Down	22.32739074438875
SNORA37	-2.94263	6.205440294876962	-16.9377	1.3106456010335843e-25	6.518752327401605e-23	47.9707398810415	Down	22.185835519172443
PPP1R12B	-1.961	7.017101811400979	-16.9154	1.406207566540507e-25	6.84523891805963e-23	47.90120092551253	Down	22.16461138916854
RP11-642D21.1	-2.93941	5.221569523992108	-16.8844	1.5509127296280624e-25	7.392360904408424e-23	47.804414672349786	Down	22.131216838464503
ZNF577	-4.41895	5.954655159316033	-16.7467	2.3997011224198792e-25	1.0980552395968884e-22	47.373020444770994	Down	21.959375811389876
CLTC-IT1	-2.98815	4.515777522643588	-16.2308	1.25690318114838e-24	5.0450329616655755e-22	45.73553162419075	Down	21.297135991959735
BC042374	-2.29608	4.792569648016987	-16.1728	1.5167198909830127e-24	5.982936963069026e-22	45.5496273155352	Down	21.223085572911838
SH3GL1P1	-1.97315	4.790248344612779	-16.0872	2.0041491831075774e-24	7.642154860053044e-22	45.27388233935484	Down	21.116784166047626
AADACL2	-3.29164	5.074570002586164	-15.8626	4.17932517051553e-24	1.5422383963907227e-21	44.54647491654177	Down	20.811848488649186
MNDA	-4.02107	7.185817470390622	-15.8415	4.4792294925219414e-24	1.6266712945938019e-21	44.4778690523705	Down	20.788700197134766
CPA1	-2.88805	4.415386972210704	-15.8128	4.92322394686024e-24	1.7599756356283658e-21	44.38430104709872	Down	20.754493344336645
DIRAS3	-4.05824	6.316434254609469	-15.6005	9.928872225483495e-24	3.34062746539466e-21	43.689692355956325	Down	20.476171952600176
CHST1	-1.94457	6.785114204086489	-15.5867	1.0393762727664103e-23	3.446360832554015e-21	43.64437361120456	Down	20.462639254054793
LOC100506236	-1.97522	4.944762094081636	-15.4429	1.677809454377288e-23	5.406563733337743e-21	43.17005358626911	Down	20.267078673118686
CHGB	-3.57547	5.870055570098606	-15.3566	2.239033063507698e-23	7.114838536110087e-21	42.88418799393525	Down	20.14783495133122
LOC101928002	-2.98494	3.9701621507182834	-15.3456	2.3225154732933145e-23	7.279018015544896e-21	42.84791972495104	Down	20.137927205741306
GATA5	-2.42716	6.1099841740276295	-15.2352	3.364975650952989e-23	1.040368620515587e-20	42.48054417457272	Down	19.98281275542123
KNG1	-3.33955	5.084407301230316	-15.172	4.162961103303808e-23	1.2369400919803612e-20	42.26965887219735	Down	19.90765133380046
ADIPOQ	-3.67948	5.380461106702678	-14.9739	8.137993334244929e-23	2.327364368677372e-20	41.60526311072419	Down	19.633135618897136
LINC01226	-1.68143	6.9522870908284755	-14.9137	9.987519437273226e-23	2.821042681547829e-20	41.402241455918954	Down	19.549590343046876
NPY1R	-4.84712	6.254392672915842	-14.8234	1.3587656320686436e-22	3.7911218165973776e-20	41.09704518920165	Down	19.421232260568008
GAL3ST2	-2.16048	7.115903304949823	-14.8083	1.4307256285828989e-22	3.943803814017849e-20	41.045877076989264	Down	19.404084697333428
GPD1	-4.43755	5.331897890080525	-14.7604	1.6854755598416064e-22	4.5907137301923936e-20	40.88339146141213	Down	19.338119788321773
AOX1	-4.77023	6.79202354208438	-14.7532	1.7278617490144518e-22	4.6507939947884293e-20	40.85876283370645	Down	19.33247289697699
SLC26A4	-3.24947	5.30224490802031	-14.7495	1.7496520706363544e-22	4.654684851638273e-20	40.84633554252437	Down	19.33210971786797
XAGE3	-1.95512	6.375493310894635	-14.6925	2.1275962258734804e-22	5.531508414972654e-20	40.65239013811923	Down	19.257156422588583
BCHE	-5.07265	6.279857266449128	-14.6819	2.2060161609159945e-22	5.670948735460341e-20	40.61649478209718	Down	19.24634427865428
GPRASP1	-2.66728	7.110966415904944	-14.6468	2.488927856784951e-22	6.327131159486987e-20	40.49682762377227	Down	19.198793162656223
PRG4	-3.80715	6.07791205192546	-14.441	5.063355673361722e-22	1.2591795049004657e-19	39.792401615218424	Down	18.899912353743805
RP5-1118D24.2	-3.35091	7.024720548605974	-14.3531	6.8697792334896185e-22	1.6720604157766912e-19	39.48971140145603	Down	18.776748034454176
ABCB1	-3.44414	5.752002583102321	-14.3313	7.411900765198524e-22	1.7546755810637076e-19	39.41435165718601	Down	18.755803167732527
EPB42	-1.77904	6.896779806384103	-14.3302	7.439290675430727e-22	1.7546755810637076e-19	39.4106919232456	Down	18.755803167732527
LGALS2	-3.18895	5.856348248040018	-14.2797	8.87001854974446e-22	2.0707872897918729e-19	39.23616065112546	Down	18.683864509321914
PPM1K	-2.12874	9.100701509836073	-14.2094	1.1335919763630798e-21	2.59354508272109e-19	38.992753178903214	Down	18.586106198410004
LOC285766	-1.57753	6.464692111370367	-14.1214	1.5421827960077251e-21	3.4934257613723507e-19	38.6872897891966	Down	18.45674848148332
NFIX	-3.07256	7.786489032004384	-14.0796	1.785650620254353e-21	3.9663981107572183e-19	38.54181047901201	Down	18.401603697435853
INMT	-2.57966	6.4151741132732125	-14.0735	1.8246916267306355e-21	4.0141461276894434e-19	38.52034469337917	Down	18.39640682185998
LOC101929315	-1.32022	5.503329673147912	-14.0508	1.976208088449735e-21	4.2654400807208946e-19	38.44117327630914	Down	18.370036154468597
CLEC4M	-3.22709	6.795807289496263	-13.9554	2.7647899146905723e-21	5.857002635019036e-19	38.10788003421464	Down	18.232324580586354
OLFM2	-2.05113	6.930616424869721	-13.9284	3.0411504369731366e-21	6.383346866743889e-19	38.013308866466474	Down	18.194951555661085
SMPD3	-3.70248	7.156749417244257	-13.9079	3.2686835217188443e-21	6.798564572127766e-19	37.94168561523808	Down	18.167582773207094
SHISA3	-6.2807	4.034184196587588	-13.8619	3.846701264337762e-21	7.788378604140148e-19	37.78004269595536	Down	18.108552944967574
TCEAL7	-4.00765	5.578034661908089	-13.7947	4.879803652300971e-21	9.624571358706371e-19	37.54387064076347	Down	18.01661860319025
TCEAL2	-3.79187	7.461492877583537	-13.7913	4.939062926543721e-21	9.65818980311058e-19	37.531886640931944	Down	18.015104264080257
LOC101927150	-1.17286	5.4857618940828425	-13.7391	5.945444388080519e-21	1.1430741357554134e-18	37.347762300032144	Down	17.941925601883476
HAND2-AS1	-2.56979	5.721785118979421	-13.6973	6.899756231222106e-21	1.315496023451088e-18	37.19995755653559	Down	17.880910460383948
RP5-1027O15.1	-2.59585	4.176158635704348	-13.6652	7.734685291618324e-21	1.462494750305253e-18	37.0865345783563	Down	17.834905684163765
KDR	-3.02121	7.861008525841615	-13.6376	8.534279801901824e-21	1.6004572753091134e-18	36.98884912839512	Down	17.795755914987613
RP11-210M15.2	-1.88041	5.4817460491497805	-13.5773	1.0586166482011751e-20	1.953233088241507e-18	36.774894579520215	Down	17.70924592727191
BC036308	-2.30837	4.452844585743274	-13.5241	1.2805537069281144e-20	2.3252212905403436e-18	36.5858808792941	Down	17.633535709145093
SLC12A4	-2.66407	7.743733431426331	-13.506	1.3660536190598442e-20	2.4609402165724538e-18	36.521691867034555	Down	17.608898936450817
ABCA5	-2.74609	6.351705879510727	-13.4603	1.609761553810075e-20	2.8773230148141176e-18	36.35865517389246	Down	17.54101138048827
MTTP	-1.78732	4.8797075895483335	-13.454	1.6465121014699484e-20	2.9201977030644147e-18	36.3362359295519	Down	17.534587744975084
TVP23A	-3.57552	5.133434493023895	-13.4476	1.684384012496536e-20	2.964386293992942e-18	36.31365003542899	Down	17.528065203385637
GABRG1	-1.91093	5.858967603639283	-13.3948	2.036696037909892e-20	3.4890399575811906e-18	36.12500869770293	Down	17.457294056846628
ADH1C	-3.08812	5.530541558137051	-13.3939	2.043495582481225e-20	3.4890399575811906e-18	36.12169824643367	Down	17.457294056846628
PCOLCE2	-3.73908	6.086264251421081	-13.3036	2.829729521498986e-20	4.760395714880536e-18	35.798362165604296	Down	17.32235694441272
KIAA1257	-2.19741	6.950433652873465	-13.2647	3.2565406788152745e-20	5.4384229336215085e-18	35.65881106440179	Down	17.264527021353935
PKD2	-3.89516	6.840670400878415	-13.146	5.0063032842380244e-20	8.299942959426213e-18	35.23160299831398	Down	17.080924892261464
DAPK1-IT1	-2.45806	5.924528318750166	-13.1285	5.334027757028933e-20	8.779656190867982e-18	35.16860651522744	Down	17.05652249062378
CD28	-1.58429	5.823951847218849	-13.0744	6.494376154908906e-20	1.0537931350933394e-17	34.973050109626676	Down	16.977244634953582
LINC00342	-3.65074	6.107747354230814	-13.0539	6.997431281829355e-20	1.1274241570209424e-17	34.898923775184365	Down	16.947912663902475
PTPRZ1	-3.37337	4.919845774897301	-13.0245	7.787231040066392e-20	1.2372504094838817e-17	34.792667464632686	Down	16.90754239378146
HAO2	-1.42556	5.6445132957569655	-12.9648	9.681637070480016e-20	1.5276287899000843e-17	34.5763097771208	Down	16.81598216544868
LOC100129476	-2.09169	5.898041687278226	-12.93	1.0995861770146297e-19	1.7231117906792948e-17	34.44982788636413	Down	16.763686545825205
AP000347.2	-1.79739	5.364020069374404	-12.9182	1.1482262761765923e-19	1.7870931273907653e-17	34.40681665332162	Down	16.747852815340973
PRSS35	-4.15023	4.9171827639234005	-12.8746	1.3468656975786358e-19	2.0820905604663248e-17	34.24825834372937	Down	16.681500384789235
FAM19A4	-2.14816	3.83906822205788	-12.8666	1.3868549175503462e-19	2.1295203797741187e-17	34.21918336569163	Down	16.671718199318295
HEXA-AS1	-1.52245	4.942395169705321	-12.8306	1.5825806383763278e-19	2.397871683802119e-17	34.08799002543268	Down	16.620174060815025
FRMD6-AS1	-1.51801	5.158605961229777	-12.7701	1.976667265410184e-19	2.9558281284522607e-17	33.867015215079206	Down	16.529320822318773
LOC101929765	-1.43606	6.341547332149841	-12.757	2.074052769462623e-19	3.081315150164633e-17	33.81922005083396	Down	16.511263880722996
KRT222	-1.62267	5.1411055098299805	-12.7491	2.1352946958863425e-19	3.1518327320763626e-17	33.79029949886028	Down	16.5014368386012
B3GALT2	-2.59902	4.239245340987289	-12.729	2.2993518393188428e-19	3.3507560975653384e-17	33.71673282194329	Down	16.474857183426018
RP1-142L7.8	-2.54424	5.881943029620544	-12.6985	2.5732567756772577e-19	3.726173529792404e-17	33.604878711493214	Down	16.428736923654373
LOC101930059	-1.87685	6.990611692368782	-12.6484	3.0956927295447363e-19	4.3991524198294415e-17	33.42116827573353	Down	16.356630990525048
LOC729164	-1.52706	6.269838105609068	-12.6329	3.2777515821469145e-19	4.6291159535764975e-17	33.3643698712785	Down	16.33450194054626
GOLGA6L2	-2.71153	4.822272291872549	-12.5838	3.9299989823516386e-19	5.5162237249830147e-17	33.1839878077848	Down	16.258358128182334
DGCR6L	-1.37407	6.118892081497432	-12.5515	4.429496549093029e-19	6.179417777237769e-17	33.065062225580455	Down	16.20905244207049
DFNA5	-3.24914	8.437285147063013	-12.5472	4.501314548048727e-19	6.241550033018596e-17	33.04907540960414	Down	16.20470754378042
SRMS	-1.38716	5.294238332317478	-12.5195	4.987790046026572e-19	6.874436654400119e-17	32.94706794101827	Down	16.1627628855573
EOGT	-3.07451	5.887708102652509	-12.5075	5.21507070600313e-19	7.144646867224291e-17	32.90277505645624	Down	16.146019231870337
GHSR	-1.29363	5.70323803211801	-12.4826	5.719306318085135e-19	7.703005792884603e-17	32.8110316282151	Down	16.11333977553658
AF131215.3	-1.77334	5.376771117050223	-12.4824	5.723637330260862e-19	7.703005792884603e-17	32.810279169077496	Down	16.11333977553658
KLHDC1	-3.81356	6.083788344616501	-12.4553	6.33026317741131e-19	8.469595978713062e-17	32.71014188143463	Down	16.072137306127434
LOC101927151	-2.85929	7.832154435533161	-12.452	6.408190442145863e-19	8.524010995689257e-17	32.69797950995011	Down	16.06935599873211
LOC100291323	-1.68758	4.737236714705172	-12.4482	6.501272537213963e-19	8.597838981440365e-17	32.683644212247245	Down	16.065610692520565
RETSAT	-2.76518	7.948745034557665	-12.4341	6.850058646998277e-19	9.00703975773986e-17	32.63169519033029	Down	16.045417920244038
LOC101929373	-1.42714	5.538019255886983	-12.4324	6.893320669065844e-19	9.012130490717571e-17	32.62543682318366	Down	16.045172528556254
BC047364	-1.46302	4.795410433084042	-12.4225	7.152135758207774e-19	9.244842599550036e-17	32.58879720265133	Down	16.03410047863448
LINC00116	-2.34331	6.717840850912869	-12.3989	7.808723360790929e-19	9.980769931370707e-17	32.50148633787747	Down	16.000835955300982
MRM1	-1.47267	6.847382940061413	-12.3842	8.247969131070119e-19	1.0483626986097404e-16	32.4471	Down	15.979488439915587
ALDH1A2	-4.53127	7.708410458866356	-12.2988	1.1344101200462815e-18	1.426053249260378e-16	32.130223836899376	Down	15.845864257493846
BC045559	-2.09863	3.3653134263539908	-12.2371	1.4287865731087054e-18	1.7669842165488686e-16	31.90085438206824	Down	15.752767329778095
TCF21	-4.30538	6.089566833629285	-12.1887	1.7134571874921042e-18	2.0963736359696182e-16	31.72021847401628	Down	15.678531310629868
FLJ11710	-1.87507	6.121039894956742	-12.1636	1.8821745283987538e-18	2.290546331661441e-16	31.626845288470065	Down	15.640060919176525
UBAP1L	-2.62002	6.7242872393576585	-12.1477	1.9983845752616432e-18	2.393602753849543e-16	31.567278640238406	Down	15.620947924157807
PROCR	-3.96566	6.8029616906939925	-12.1474	2.0006555324142783e-18	2.393602753849543e-16	31.566149418518386	Down	15.620947924157807
DSG4	-2.16887	3.268014644076928	-12.1463	2.0087054886101327e-18	2.393602753849543e-16	31.562156916835633	Down	15.620947924157807
ELMSAN1	-1.8491	7.359227635043096	-12.0584	2.7956278980991543e-18	3.280060034903105e-16	31.23348255635431	Down	15.484118207328402
RP11-798M19.6	-2.13008	4.435374669228818	-12.0521	2.8633069935302544e-18	3.3423265665805455e-16	31.209698309894	Down	15.475951119034182
PCDH9	-2.31879	7.0010358100789825	-12.0209	3.2196561344526e-18	3.7392138426467535e-16	31.093068015770527	Down	15.427219697181744
POLR2J2	-1.41215	6.653581433510156	-12.0162	3.277980098428278e-18	3.7877225591889183e-16	31.075217086874577	Down	15.421621839443322
CLYBL-AS2	-1.99643	3.7048121500456577	-11.9946	3.555969677015367e-18	4.08829297690626e-16	30.99427823947545	Down	15.388457989171165
CMAHP	-2.89341	6.013110413059756	-11.9837	3.704670541037723e-18	4.237957865420103e-16	30.95354362539385	Down	15.372843365441767
CALB2	-2.6801	8.53059077519871	-11.8845	5.391946385747476e-18	6.076962628547611e-16	30.58034579813548	Down	15.216313434422053
BC040734	-1.96176	4.351770089470088	-11.8793	5.4984007407543445e-18	6.165717464427457e-16	30.560904586663906	Down	15.210016380104388
RP11-420K14.2	-1.58195	5.39590190125452	-11.8781	5.5245949569807624e-18	6.165717464427457e-16	30.556178572269168	Down	15.210016380104388
BD495725	-1.85415	5.750863300041737	-11.876	5.568357027071926e-18	6.184390311765951e-16	30.548332690165076	Down	15.20870310885413
CPB1	-3.04432	6.218676376799515	-11.8313	6.596950266982473e-18	7.221608859248422e-16	30.379773539263276	Down	15.141366037768826
CSGALNACT1	-3.39783	6.24077938975075	-11.8001	7.426934972337329e-18	8.053120627114018e-16	30.261928626919563	Down	15.094035795593078
HDX	-1.80625	4.930734087866566	-11.7639	8.523098285655176e-18	9.154927966080037e-16	30.125027624136045	Down	15.038345068517613
LOC100130691	-1.61961	5.3319497450590365	-11.7231	9.95220748432926e-18	1.0541507177498571e-15	29.97087274730619	Down	14.977097291203577
LOC253805	-1.22288	5.145606860765785	-11.6886	1.1351229393032072e-17	1.1967962086782526e-15	29.840068391646973	Down	14.921979795275671
RP11-305O6.3	-2.37178	5.544611936340996	-11.5915	1.644459879522188e-17	1.7179724924012848e-15	29.471437492365503	Down	14.76498379422653
MIRLET7D	-2.01846	6.992077196384125	-11.5775	1.7348130318057893e-17	1.804126697940212e-15	29.418243129325596	Down	14.743732966636554
MGARP	-4.41395	7.0608762249264805	-11.5546	1.8935195215713375e-17	1.951433924956335e-15	29.33118493194761	Down	14.709646149231654
ZNF816	-1.83618	7.152982953279042	-11.5412	1.9934445980070594e-17	2.0452026438476913e-15	29.280039453916167	Down	14.689263654529638
LHX2	-3.29979	6.822221204948727	-11.5359	2.0341839667197638e-17	2.077682811365245e-15	29.259919422502534	Down	14.682420753115842
LOC202181	-2.84123	6.777443851326885	-11.5155	2.1997713276242553e-17	2.236825253542904e-15	29.182088297972665	Down	14.650367942763623
LOC100128644	-1.16519	5.759401374992204	-11.5047	2.292336253535948e-17	2.320635448878272e-15	29.1410951921222	Down	14.634393077973819
LOC101929248	-1.2332	6.479299659387659	-11.4682	2.6366643075617102e-17	2.657455625229267e-15	29.001914884211303	Down	14.575533978687625
HCN2	-2.25091	6.232848775269524	-11.4457	2.8749017843630106e-17	2.8722654115476564e-15	28.91588170311988	Down	14.541775431614694
IGHV7-81	-1.38111	4.757748096900686	-11.4359	2.9849578775918175e-17	2.9549298285941245e-15	28.878518831159504	Down	14.529452827952339
BTD	-2.32512	7.085061214217325	-11.4349	2.996388479539477e-17	2.9549298285941245e-15	28.87471751787598	Down	14.529452827952339
SEL1L2	-1.85568	6.31695488087699	-11.4277	3.080242248819584e-17	3.024586369559797e-15	28.847266983064905	Down	14.519334009342229
MXD1	-1.65084	7.274680093954952	-11.4096	3.3022207501452276e-17	3.228696946263789e-15	28.778057935688437	Down	14.490972717058405
FLNC	-1.90228	7.610157522308672	-11.364	3.935858095233751e-17	3.815614294951398e-15	28.603475946973113	Down	14.41843553282549
BMP2	-1.57944	6.789950171799923	-11.3624	3.959250285459347e-17	3.8220965097478644e-15	28.597582279642317	Down	14.417698351001107
RAB11FIP3	-2.46317	7.384626978641368	-11.346	4.217242082237097e-17	4.05404544535725e-15	28.53479732340932	Down	14.392111387227308
RPRD1B	-1.62998	7.207477633819077	-11.3184	4.6913305035396266e-17	4.490918434748248e-15	28.428838623045372	Down	14.347664832637225
IRX2	-1.67293	6.051115811221651	-11.3167	4.721620842175826e-17	4.501081802005864e-15	28.42243749886812	Down	14.346683094185066
HBG1	-3.59566	7.7668371373672125	-11.2913	5.2088120414553776e-17	4.904214431952988e-15	28.32476824753251	Down	14.309430548975374
ABHD12B	-2.14664	5.479751058205897	-11.2813	5.4120499971982854e-17	5.074684093684409e-15	28.2866987096371	Down	14.294590988023598
MRPS27	-2.5369	7.881120991891485	-11.2535	6.025884434296471e-17	5.627192243766079e-15	28.17984184896003	Down	14.249708247636017
L3HYPDH	-1.17855	6.641799391123075	-11.2515	6.072342707842061e-17	5.647525561492621e-15	28.17220303153708	Down	14.248141794725427
CHRDL1	-3.77127	7.644047680760251	-11.2101	7.127245944697462e-17	6.52257039874933e-15	28.012885357054905	Down	14.185581224819021
MPRIP-AS1	-1.71901	4.975320928239911	-11.208	7.184364686779597e-17	6.548648592383683e-15	28.00494612008235	Down	14.18384831366088
RPS4XP3	-2.81425	7.694967903738354	-11.1779	8.07151622440697e-17	7.328103956278059e-15	27.889138173163907	Down	14.135008378407116
TLR4	-2.16348	5.823512417365643	-11.1391	9.380012415024784e-17	8.35040093553899e-15	27.739705722124658	Down	14.078292671832335
LOC646762	-1.82807	7.853451439840827	-11.1097	1.0512038365803923e-16	9.285904469931582e-15	27.62637734729823	Down	14.03217578851337
OGN	-5.12506	6.258033958549739	-11.0966	1.1059564905790264e-16	9.73199174921444e-15	27.575875220888207	Down	14.011798267936056
DSC3	-2.97398	6.710531222400608	-11.0588	1.281215117251954e-16	1.1145597212018046e-14	27.429565597452367	Down	13.952896655857133
SFRP1	-2.91017	8.268681908679286	-11.0172	1.505642429079999e-16	1.2999091749026903e-14	27.26901965916958	Down	13.88608699093667
AF075036	-1.93134	5.905369745209592	-11.0098	1.5499008983146232e-16	1.3330895734037694e-14	27.240203490075203	Down	13.875140668344565
CD180	-1.44328	5.661478875638641	-11.0076	1.5628347281070632e-16	1.3391796158936887e-14	27.23193767829836	Down	13.873161169843844
LOC101927723	-2.42754	3.705588404545069	-11.0011	1.602986576094394e-16	1.3684600699426731e-14	27.206706316293193	Down	13.863767870271802
DENND4A	-1.65052	6.146876867211934	-10.9588	1.8897316706822008e-16	1.595393759909154e-14	27.043020858016924	Down	13.797132110944888
ADCYAP1	-1.79045	6.099153972562224	-10.9496	1.9587224937015704e-16	1.6415242466446236e-14	27.007355109796393	Down	13.784752698005494
PRICKLE2	-1.84766	7.215162344893535	-10.9422	2.0163919692041712e-16	1.6836872942854827e-14	26.97849308217988	Down	13.773738565435496
TTLL11-IT1	-1.33695	5.624850533680136	-10.9343	2.0791014003879143e-16	1.7297367614354583e-14	26.948030918128023	Down	13.762019984590651
GPR133	-4.42464	6.569076329591185	-10.918	2.215641522382104e-16	1.83665443444131e-14	26.884764985233065	Down	13.735972548284755
OMD	-2.89455	5.932557228619704	-10.881	2.559902257454923e-16	2.0992116038821213e-14	26.741110400602334	Down	13.67794378163368
SNCA	-1.79035	7.398618607928299	-10.879	2.5797511974896454e-16	2.107933130263057e-14	26.73342782771696	Down	13.67614317031831
LOC100996760	-3.85579	5.94920715745259	-10.8449	2.9478831431949305e-16	2.3832020647758592e-14	26.600746847257017	Down	13.622839133525652
RYR2	-2.50563	5.777252153782837	-10.8385	3.021858312074398e-16	2.4344048000686675e-14	26.576094749838585	Down	13.613607204323369
RP11-171I2.1	-3.01105	1.819507386904874	-10.8221	3.221830551054117e-16	2.5863951290374444e-14	26.512359718915192	Down	13.587305126303303
ITPK1-AS1	-1.26363	6.2870660147670865	-10.8182	3.271409538324088e-16	2.6078947326591234e-14	26.4971701387054	Down	13.58370994282813
MGC24103	-2.99466	6.888221153609918	-10.8148	3.315141894289678e-16	2.6335809513699152e-14	26.483961675532857	Down	13.579453327698403
UBE2NL	-2.58866	8.83041282884774	-10.8122	3.349015418705219e-16	2.6512845593272223e-14	26.47385007307578	Down	13.576543657437272
SERTM1	-3.94108	6.914822640220909	-10.8095	3.385647056579855e-16	2.671042034741052e-14	26.463029609500133	Down	13.573319277342746
RP1-305G21.1	-1.18726	6.5242387717747805	-10.8058	3.434257048834147e-16	2.7000813409029703e-14	26.44885027998411	Down	13.568623152369454
C9orf84	-1.80854	5.443978721769039	-10.7649	4.0300728539160166e-16	3.1576724939981007e-14	26.2897221637841	Down	13.500632915944331
AK057978	-1.88759	5.690295988794011	-10.717	4.863832562886239e-16	3.7850212655195345e-14	26.10268605826954	Down	13.421931676144927
OSR1	-3.41975	4.9031265938101365	-10.696	5.280922252560842e-16	4.0544369200113936e-14	26.020852429780337	Down	13.392069452060017
FLRT2	-4.01388	7.823546088973943	-10.6817	5.585617853354895e-16	4.2597783622302225e-14	25.965058470317096	Down	13.370612996804434
MYO1F	-1.42973	6.4259918857273215	-10.6505	6.313535379788518e-16	4.7989161446571936e-14	25.84321387181226	Down	13.318856838779984
GRIPAP1	-1.58187	6.969493228278388	-10.6017	7.647590566889599e-16	5.736695887864497e-14	25.65254662874324	Down	13.241338172206282
RP11-579O24.3	-1.48296	3.984647918738669	-10.5778	8.402248226810015e-16	6.241397311077477e-14	25.55894286168311	Down	13.20471817048491
LOC101928135	-1.78554	4.8745246462294824	-10.5497	9.384678596347215e-16	6.903924810476786e-14	25.448957448968297	Down	13.16090394709772
PLEKHH2	-4.12302	5.933719987612502	-10.5198	1.0559318164204522e-15	7.693842047096665e-14	25.33166087611807	Down	13.11385673390891
MS4A15	-1.43374	5.078012819026736	-10.4732	1.2688433202979353e-15	9.215830579395705e-14	25.14896708615769	Down	13.035465517765251
ANXA8	-3.32509	8.830497535132208	-10.4215	1.5567113627894953e-15	1.1235330999766833e-13	24.94559952985717	Down	12.949414128473625
SPOCK1	-4.00687	7.558600982776464	-10.4127	1.6117565749019397e-15	1.1596031030560214e-13	24.911037959303695	Down	12.935690631159137
PDGFD	-3.26279	7.738681339289682	-10.401	1.688129424787552e-15	1.2107433576712976e-13	24.864991516814847	Down	12.916947904882798
TMEM255A	-4.42963	5.413618814695405	-10.3762	1.8620422076864912e-15	1.3148661626438036e-13	24.767468666392645	Down	12.881118450811766
FAM106A	-1.59266	5.903064213750719	-10.3454	2.1033370463696756e-15	1.476142585395454e-13	24.646276799871146	Down	12.830871690575561
CTD-2540F13.2	-1.62413	4.3694021882388565	-10.3213	2.3135379376522124e-15	1.6099707818089661e-13	24.551540247231156	Down	12.793182005591927
ILDR2	-3.20507	7.6144683283013235	-10.2748	2.782177554087375e-15	1.9172722969868993e-13	24.368085868924343	Down	12.717316202885717
MEOX2	-4.79617	3.919099622695175	-10.2343	3.2673390976763602e-15	2.2248050957064714e-13	24.208218954456424	Down	12.652708029432162
ARX	-2.61601	6.659428540952101	-10.2332	3.2814135877753597e-15	2.227758500733307e-13	24.203944006248324	Down	12.652131890465785
IGFBP6	-3.15424	7.8820615897694335	-10.2282	3.347234758318106e-15	2.2657214211704125e-13	24.184192030695343	Down	12.644793489303138
ZDHHC8P1	-2.52439	6.683576800784922	-10.2263	3.3736315956858973e-15	2.276853017041228e-13	24.17637963957208	Down	12.642665004496097
CXorf57	-3.07444	5.88573465337877	-10.213	3.5566038585695194e-15	2.393280578829766e-13	24.123851486546915	Down	12.621006383419829
MMP21	-2.43164	2.6946310248994423	-10.1734	4.162308224689652e-15	2.768297961414958e-13	23.967447407816053	Down	12.557787167093155
CHIC2	-1.46595	6.790567463750947	-10.1686	4.243025263523878e-15	2.8138021740337044e-13	23.94834581333532	Down	12.550706439149181
SPINK6	-1.55626	6.1481317985781665	-10.1143	5.2664648991214155e-15	3.4426128693428245e-13	23.73344845897773	Down	12.46311181207926
KDM4B	-2.17614	8.47692956521398	-10.0712	6.252249189106829e-15	4.040825118575569e-13	23.562811385658208	Down	12.393529944826122
PTGIS	-3.49916	8.076008202338977	-10.0681	6.329709622953462e-15	4.079364125733866e-13	23.55056622408319	Down	12.389407527647112
DEFB127	-1.45923	5.205503988886333	-10.064	6.434568742798041e-15	4.135294895125741e-13	23.53422643818149	Down	12.383493514706538
NELL2	-2.77653	8.52511424171873	-10.0514	6.7653273694119195e-15	4.323573320803779e-13	23.484377425282993	Down	12.364157171694606
MARK3	-1.97816	8.252380077653346	-10.015	7.822888095405271e-15	4.930574565696341e-13	23.339938044783672	Down	12.307102468923217
CDON	-2.77162	7.782577880566877	-10.0103	7.969566268895414e-15	5.009222710605993e-13	23.321464767181997	Down	12.30022965909965
PRICKLE3	-1.0561	6.1377669891575914	-9.99799	8.372438093872593e-15	5.24802770273181e-13	23.272423312403305	Down	12.280003881118715
LYPD8	-1.06709	6.197734401059139	-9.99553	8.455165066408618e-15	5.285402228261279e-13	23.262645526567095	Down	12.276921956536832
PAPSS2	-2.51621	8.17786050880879	-9.95598	9.902309243214851e-15	6.089199534763079e-13	23.105533877360617	Down	12.21543979447451
SLC31A2	-1.63578	7.7347317295903935	-9.95535	9.927319491527724e-15	6.089199534763079e-13	23.103025421059485	Down	12.21543979447451
SLC30A4	-2.17366	8.192964826701164	-9.95444	9.963480768869789e-15	6.095039478902991e-13	23.099409701858683	Down	12.2150234770162
CES5A	-1.25309	6.285055833037279	-9.93808	1.0636903910014131e-14	6.472386291415247e-13	23.03437155294658	Down	12.188935570625757
MGC27382	-1.54491	4.262303140674493	-9.92223	1.1332704644683778e-14	6.87747876832149e-13	22.971362243730496	Down	12.162570741660206
KLF2	-2.76777	7.889119042474173	-9.91975	1.1445777910940064e-14	6.927723619693061e-13	22.96148960149656	Down	12.159409446746553
DPP10-AS1	-2.2676	6.288918127929808	-9.91155	1.1827387148335434e-14	7.12102080438859e-13	22.9288762266317	Down	12.147457745417118
CYP2B6	-1.32544	7.607809086818847	-9.90631	1.2078262441790744e-14	7.238203308343635e-13	22.90800418018599	Down	12.140369222491744
ARHGEF6	-2.62651	7.161670977065439	-9.89152	1.2814332633002952e-14	7.654807214372703e-13	22.849178771763277	Down	12.116065742495234
ZDHHC7	-1.31983	8.639216794511764	-9.88807	1.2992559609193054e-14	7.741061752571039e-13	22.835443678001603	Down	12.1111994680434
DHRS12	-1.7705	6.526250630042674	-9.88515	1.3145249721169388e-14	7.811692684951543e-13	22.823825638202376	Down	12.107254850363063
FAM153A	-3.90275	7.9895054573385504	-9.88231	1.3295488987675148e-14	7.880504988316573e-13	22.812525077085617	Down	12.103445951722085
PLCE1	-2.90198	6.651982988988619	-9.86246	1.4395757095613994e-14	8.488673365735891e-13	22.733463168052065	Down	12.071160177242414
DLGAP2	-2.47693	5.924267250234765	-9.86038	1.451611400628665e-14	8.537639392026539e-13	22.7251841833093	Down	12.068662192628858
LINC00310	-1.81019	5.398460045151745	-9.84696	1.531748552903771e-14	8.962883668001377e-13	22.671751073480657	Down	12.04755224038082
CYP51A1-AS1	-1.72802	4.955785468965336	-9.84238	1.5601253826076393e-14	9.082470388977144e-13	22.65349826755795	Down	12.041796009366683
FCN1	-2.10982	6.177965945255065	-9.80583	1.8062656272176105e-14	1.0383304342992892e-12	22.50783045217131	Down	11.983664416279446
JUNB	-2.0441	7.867013231715272	-9.80286	1.8278671475017278e-14	1.0481145981877702e-12	22.496009483916033	Down	11.979591230100711
SHC4	-1.22197	5.488544846227235	-9.78909	1.9316758634728244e-14	1.0993734348356902e-12	22.441084334868904	Down	11.958854761497685
GALNT9	-1.00619	6.578974269160153	-9.78127	1.9932439112172963e-14	1.1287977090282306e-12	22.40988687340575	Down	11.94738388068302
CXorf21	-1.4128	6.129778811049931	-9.76749	2.1065651231737723e-14	1.1870961441648457e-12	22.354905678890276	Down	11.92551410565423
HSD17B2	-2.03003	5.984331485456875	-9.73231	2.4260851482723363e-14	1.3571247459003124e-12	22.214489995329252	Down	11.867380230478702
RTN1	-3.07955	7.082509271532545	-9.71376	2.6137643930249756e-14	1.4549955121172365e-12	22.14040327792388	Down	11.837138346242146
PRR32	-1.79795	5.932726139129532	-9.68721	2.908069407307598e-14	1.608435224531198e-12	22.03431681838159	Down	11.793596424469888
ADH1B	-3.16892	7.41428034406667	-9.66413	3.19078693709726e-14	1.7590846827433305e-12	21.942072041118937	Down	11.75471325300252
RP3-508I15.21	-1.38566	6.434064763123805	-9.64665	3.4232708341174416e-14	1.8782017605221332e-12	21.872148500519607	Down	11.726257756705207
NOL4	-1.46392	5.511787161169172	-9.63876	3.5336857911372596e-14	1.934143474053334e-12	21.84058679253718	Down	11.71351131325274
PP2672	-1.31688	5.810311979475795	-9.63759	3.5502730537485683e-14	1.9385846586327807e-12	21.835930787858143	Down	11.712515228459072
MARCO	-2.98189	6.768284644422818	-9.62247	3.773087196269367e-14	2.0553443324630207e-12	21.77541375427135	Down	11.68711541020565
KCNB1	-1.38754	7.031717005647359	-9.61052	3.9589262971349385e-14	2.1412830910673817e-12	21.727612992562054	Down	11.669325912452859
BCAR3	-2.38714	8.036701819003994	-9.57178	4.6274522414571335e-14	2.4794257571966685e-12	21.57248645343843	Down	11.605648891495695
CCDC132	-1.86086	8.613025129903631	-9.5448	5.1589322426132734e-14	2.74491187857556e-12	21.464398173158827	Down	11.561471593386084
IL22RA1	-1.20821	6.307093145459824	-9.51989	5.704136446122604e-14	3.0209476331212744e-12	21.36452501595472	Down	11.519856802976829
PCIF1	-1.61059	7.28486949512115	-9.50577	6.038336763781378e-14	3.1905567394585252e-12	21.3079226686743	Down	11.496133527670759
BC033323	-1.13505	5.571357451793359	-9.48615	6.535779426177384e-14	3.437519482563502e-12	21.229226099544093	Down	11.463754831737436
LINC01359	-1.84753	7.456016197420233	-9.48507	6.564225273608078e-14	3.439206308084425e-12	21.22490884457866	Down	11.46354177132099
CHRNB3	-1.92855	6.886496037850501	-9.48489	6.569050905340679e-14	3.439206308084425e-12	21.224178310520543	Down	11.46354177132099
LOC101928845	-1.12855	5.627843603846235	-9.48098	6.673677829522848e-14	3.4860062799464204e-12	21.208469851719	Down	11.457671834855509
KIT	-1.76806	6.006318101216211	-9.48001	6.699862694787132e-14	3.491712040866396e-12	21.204577051377548	Down	11.456961579462277
LOC102723809	-2.17208	3.3981300996486627	-9.47929	6.71937663355016e-14	3.493923136340775e-12	21.20168587457942	Down	11.456686653397233
PMP22	-3.17549	8.332657783934167	-9.47816	6.750018555094547e-14	3.5018973814514308e-12	21.197162884868863	Down	11.455696584501105
NPL	-1.91544	8.384628978798485	-9.47527	6.829127850333019e-14	3.5349234408997547e-12	21.18558001611883	Down	11.451619987681743
LOC100506834	-1.44595	6.781690810727511	-9.46711	7.057727692143458e-14	3.6367962132556346e-12	21.152848563060527	Down	11.439281033819675
CNN1	-2.4314	6.549281567669937	-9.43998	7.87507732774718e-14	4.021738709409101e-12	21.04391846395106	Down	11.395586148743751
IL18	-2.46595	7.146397823324806	-9.40834	8.94898329011258e-14	4.529729838373578e-12	20.91684298655191	Down	11.34392769935635
C8orf49	-1.94199	3.427439124963893	-9.4052	9.063190722251088e-14	4.567329086660411e-12	20.904237418120417	Down	11.340337695340299
TSC1	-1.15253	8.369787620351655	-9.40386	9.112264964548789e-14	4.5819672554705866e-12	20.898869612085477	Down	11.338948018773694
PP12719	-1.56726	5.748647440054897	-9.38208	9.95113506969756e-14	4.960174711538355e-12	20.81133141499439	Down	11.304503026146753
GHR	-3.49504	6.170907006198257	-9.34018	1.1788872164390178e-13	5.82543426023937e-12	20.64288155646091	Down	11.234671694371306
SSTR1	-1.67032	5.032863736586486	-9.33124	1.2222946223170012e-13	6.001046923603148e-12	20.606941027724066	Down	11.221772977369508
MOP-1	-1.88527	3.80575031432517	-9.32783	1.2393117510379948e-13	6.07156607109171e-12	20.59319838471708	Down	11.216699274606734
LINC00266-1	-1.28034	3.7716028704033073	-9.32351	1.2611702666888161e-13	6.165451822985773e-12	20.57582029762917	Down	11.21003509148684
MAOA	-1.90823	7.868976292284652	-9.30587	1.3545016091936898e-13	6.593540918455837e-12	20.504859613662013	Down	11.180881294305712
ZMYND15	-1.1302	6.316827832370779	-9.29326	1.4254769856174705e-13	6.924307421219132e-12	20.45409711023347	Down	11.15962365882448
ABI3BP	-3.32051	6.791667303080844	-9.2632	1.610009424964843e-13	7.775886294127164e-12	20.333106124994952	Down	11.109250098672598
RAB27B	-2.19624	8.43069877222472	-9.26305	1.61098391687411e-13	7.775886294127164e-12	20.33250473772472	Down	11.109250098672598
LOC101928818	-1.95451	5.676342494231722	-9.25938	1.635155935611622e-13	7.875943715970168e-12	20.317702797516635	Down	11.10369739613104
TAGAP	-1.72735	7.763910289949455	-9.24382	1.7415901993493045e-13	8.370975245990069e-12	20.255028801605935	Down	11.077223942331841
ARHGAP23	-2.03637	8.774708346044696	-9.23659	1.793388231374499e-13	8.60187198021324e-12	20.22590066569446	Down	11.065407025243992
MIR101-1	-1.14011	5.859227282061165	-9.22819	1.855478951050419e-13	8.862526705862743e-12	20.192073782181	Down	11.052442443127202
LOC100287387	-1.75109	3.795891005665325	-9.21037	1.994497080508273e-13	9.467240395217586e-12	20.120269977706503	Down	11.023776594997237
LOC730102	-1.65812	6.061485523287664	-9.19863	2.0917916536961417e-13	9.908509574516359e-12	20.072935266931477	Down	11.00399166662901
AGRN	-1.95072	8.052479152759497	-9.19812	2.0961439850238954e-13	9.908611205240019e-12	20.070869614700843	Down	11.003987212131008
OR6B1	-1.60937	5.99876888082903	-9.19228	2.1463411404261898e-13	1.0124977103466142e-11	20.047350953293623	Down	10.994605950221892
SNORD50A	-1.50745	7.479284320183514	-9.18444	2.215732207872993e-13	1.0430810120149426e-11	20.015729818537924	Down	10.981681960312917
GPR112	-1.5057	6.318622471789096	-9.16692	2.3789869829845417e-13	1.1107927180347618e-11	19.945079563742105	Down	10.954366975993878
FGF13	-2.78828	7.137563036288268	-9.13887	2.6658366113353383e-13	1.2271966967955974e-11	19.831946495518483	Down	10.911085822369488
ID3	-2.6416	6.676233401513489	-9.12618	2.806818195924533e-13	1.286917705502152e-11	19.78073556589207	Down	10.89044922402725
ZNF80	-2.35208	2.9259253688212867	-9.12482	2.8223783765071593e-13	1.291463897522146e-11	19.77524182782211	Down	10.88891772989025
HBA1	-2.35986	10.860693069300032	-9.12283	2.8452460503507824e-13	1.2993290296601906e-11	19.767222812463416	Down	10.886280858417736
RTKN2	-2.11133	5.009922589700224	-9.1062	3.044074638523962e-13	1.3873582401352532e-11	19.70009976698744	Down	10.857811382023147
LOC101927018	-1.88097	4.377692671252544	-9.086	3.304353807937634e-13	1.5029882857217717e-11	19.61857303824195	Down	10.82304440428749
RP1-78O14.1	-2.71528	5.872210058133087	-9.08227	3.35484695426779e-13	1.5229274497359675e-11	19.60350364905968	Down	10.81732078539004
SMIM2-AS1	-1.86879	5.122586821174388	-9.06906	3.539923486124485e-13	1.6037605829513282e-11	19.550144564666407	Down	10.79486046476997
SLC19A3	-1.88895	5.815860979372921	-9.06739	3.5639564761133805e-13	1.6114577117983797e-11	19.54342126685315	Down	10.792781086846395
MAF	-3.1214	8.416378005118835	-9.05319	3.775752073355219e-13	1.7005006237459456e-11	19.486059447096324	Down	10.769423204431423
OLFML1	-2.40258	7.681326232510155	-9.04953	3.8322579298524665e-13	1.7191809642567566e-11	19.471299331583428	Down	10.764678406243938
ANKRD36C	-0.918794	4.831271312506326	-9.04837	3.8505103644938147e-13	1.7239887794374558e-11	19.46657802770588	Down	10.7634655651031
CROT	-1.48563	8.445379370259104	-9.04401	3.9192390818465014e-13	1.7513334170618378e-11	19.448998827337185	Down	10.756631165506672
DISP1	-1.92351	7.602674675396949	-9.02606	4.21607301129864e-13	1.8730006684563417e-11	19.376457983625777	Down	10.727462067629114
FAS	-1.87534	8.555677444143418	-9.01769	4.362092408675156e-13	1.9341145778697463e-11	19.34262804197957	Down	10.713517801678751
LINC00691	-2.05126	3.787809175351805	-8.99558	4.772512805885525e-13	2.0998138554972097e-11	19.25328385831935	Down	10.677819202939183
APOBEC3C	-1.69378	5.81430537572515	-8.98493	4.983880819392167e-13	2.188602865007167e-11	19.210226905742637	Down	10.65983303659707
PTGIR	-1.37294	8.17982151428532	-8.94612	5.836883004680537e-13	2.5436580240778287e-11	19.053260972564946	Down	10.594541276765401
ALDH1A1	-2.91359	7.430251915901413	-8.93541	6.09705709267082e-13	2.641942598924539e-11	19.009935259990066	Down	10.57807662246757
LOC101929241	-1.7184	5.587367547081078	-8.93184	6.186301363283187e-13	2.6755461037912295e-11	18.99549871229837	Down	10.572587561060642
ZNF546	-1.94937	4.392791005456228	-8.92335	6.403985866401088e-13	2.764467785611141e-11	18.961141013839068	Down	10.558388466536544
PABPC5	-2.7915	3.847425908378229	-8.91848	6.53216313592303e-13	2.8144888961729375e-11	18.941452853202343	Down	10.550600460395264
LOC100134040	-1.94564	6.438941879541178	-8.91535	6.615915065369532e-13	2.845216556026119e-11	18.92879613974681	Down	10.545884672851361
RP3-337H4.8	-1.44372	4.714910085808597	-8.9125	6.69339246960194e-13	2.873135578086731e-11	18.91722955238891	Down	10.541643879951083
ANKAR	-1.53768	4.535891470020023	-8.9053	6.892421386377673e-13	2.931072656114029e-11	18.888119747131977	Down	10.532973416035016
LYVE1	-1.91187	6.193349721853592	-8.9042	6.923459443072662e-13	2.936172606668752e-11	18.88365607919315	Down	10.532218417447941
NKX2-8	-1.44457	5.902277898520537	-8.90397	6.930080893400613e-13	2.936172606668752e-11	18.882706421293268	Down	10.532218417447941
ZIC5	-1.40956	5.7322056299922854	-8.88905	7.364145920226846e-13	3.1085663193518455e-11	18.82235355885031	Down	10.507439862791141
BAMBI	-2.34412	7.3681774487752385	-8.87258	7.875381784715341e-13	3.3182478794199317e-11	18.75567696520321	Down	10.479091174477052
L3MBTL3	-1.27484	6.867629311283058	-8.84827	8.695877645883036e-13	3.6371660815385374e-11	18.65722506044155	Down	10.439236867587319
RP5-1102E8.3	-2.14864	4.102200311661216	-8.80914	1.019999701055217e-12	4.243013301898602e-11	18.498749228147553	Down	10.372325606712737
RUFY2	-1.75572	6.99067358413349	-8.80416	1.040947390609652e-12	4.314462925680839e-11	18.478556358055997	Down	10.36507325856528
NUMB	-1.27294	5.801172741468535	-8.78806	1.1116048619127309e-12	4.5989887225499756e-11	18.41332335088829	Down	10.337337655383632
LOC102723697	-0.943098	5.099945926763697	-8.77461	1.1743029890417205e-12	4.840878934465859e-11	18.358822652029858	Down	10.315075778493355
BC041363	-1.16698	4.715749844133024	-8.76652	1.2137278921778446e-12	4.9854363456260146e-11	18.326023673153102	Down	10.302296824472823
PID1	-2.72147	5.777018158272351	-8.74866	1.3055331295045186e-12	5.333802226773907e-11	18.253602065869277	Down	10.272963091648231
VAV1	-1.43622	6.623531691656284	-8.74111	1.3463572127144376e-12	5.4810154216536686e-11	18.223019904684683	Down	10.261138975973838
LOC401220	-1.52974	4.663567148623589	-8.74067	1.3487705988169173e-12	5.4810874831851226e-11	18.22124114267274	Down	10.261133266134085
NR0B1	-1.43921	6.527983990002372	-8.73866	1.3598765757028494e-12	5.516421307713739e-11	18.21309642151198	Down	10.258342572694158
MUM1L1	-3.69727	7.396279682406976	-8.73221	1.3961738363319748e-12	5.6536391506972125e-11	18.18693397255238	Down	10.247671914251546
TOB2	-1.303	8.833884778031509	-8.73067	1.4050080704154221e-12	5.679360360960149e-11	18.18066937895926	Down	10.245700574033348
LRRC37A	-1.69173	6.213437645469387	-8.71399	1.504026138557758e-12	6.055397108314704e-11	18.11303132995259	Down	10.21785737088679
LINC00165	-1.22225	6.142819300917815	-8.71367	1.5059753287429817e-12	6.055397108314704e-11	18.111745038509323	Down	10.21785737088679
C5AR1	-2.94343	5.728553221704746	-8.71293	1.5105450675091013e-12	6.063115894656268e-11	18.108735936668378	Down	10.217304130275894
CGNL1	-2.27507	8.15631421438145	-8.70922	1.533563514669611e-12	6.143977060619185e-11	18.093715793442588	Down	10.211550414471516
LOC102725345	-1.50307	4.735325733546152	-8.70883	1.5360614007055265e-12	6.143977060619185e-11	18.09209944160279	Down	10.211550414471516
TRIM72	-1.20297	6.067957608691365	-8.6979	1.6061560285590884e-12	6.401958846237523e-11	18.04778297475959	Down	10.193687121961553
BDKRB1	-1.31167	6.1148679004855415	-8.69562	1.6211782001942014e-12	6.450597572564024e-11	18.038537442919537	Down	10.19040005118708
DOCK11	-2.75358	7.950322868274625	-8.65735	1.895525520493956e-12	7.490108529081386e-11	17.88327227207555	Down	10.125511889478144
LOC102723684	-1.17023	4.9078775677820845	-8.63774	2.053650387019638e-12	8.086999518867866e-11	17.803705622201438	Down	10.092212582727523
ZC3H3	-2.06016	6.672622967096367	-8.63614	2.067114086955395e-12	8.126031476881869e-11	17.79721650437202	Down	10.09012149972932
HBD	-2.93902	7.585590232082488	-8.62686	2.146995519480083e-12	8.411149056538497e-11	17.759564718754	Down	10.07514467069126
RIPPLY3	-1.89522	4.7846287984237685	-8.61564	2.2478048534413857e-12	8.767301351678558e-11	17.714000509621336	Down	10.057134065520279
S100PBP	-1.37024	8.300327525556623	-8.59888	2.4072288061881347e-12	9.31894887593542e-11	17.645958615791436	Down	10.03063307081396
LOC100996792	-1.43384	8.904373546108616	-8.59807	2.41519814054699e-12	9.334006462428136e-11	17.642676710454513	Down	10.029931902765636
DPP10	-4.3754	4.795883122222287	-8.59438	2.4518844076800706e-12	9.459808324335974e-11	17.627707095491647	Down	10.024117663231035
ATP10D	-2.1836	7.127132538170115	-8.59228	2.473068846861101e-12	9.525478475982344e-11	17.619164635089426	Down	10.021113199982027
LOC100507513	-1.15256	5.44989811122197	-8.56298	2.7877940289246813e-12	1.0701667716068419e-10	17.50021939242994	Down	9.970548537880383
ZNF587B	-1.28667	8.819670615959765	-8.55099	2.9278980874751864e-12	1.118320206065856e-10	17.451533074581402	Down	9.951433828098367
LOC283682	-0.978514	5.68538244880906	-8.54614	2.986580894908271e-12	1.1369381746190736e-10	17.431829716883865	Down	9.944263151101017
CT62	-1.37116	4.712206423756062	-8.53554	3.1189561883389656e-12	1.1814337522021058e-10	17.388769443246307	Down	9.927590626007662
TSLP	-1.62459	3.916278885954479	-8.51763	3.356058867104241e-12	1.2649632754609214e-10	17.316024212781738	Down	9.897922082785547
HCP5B	-1.03633	6.66151173082598	-8.51544	3.3863034263041098e-12	1.274263751487035e-10	17.307116937503665	Down	9.894740670933123
TMEM168	-1.45274	9.524350268065543	-8.48735	3.798746485728744e-12	1.4131954609266332e-10	17.193011385838027	Down	9.849797766154884
OR8D1	-1.07952	6.621566847426632	-8.48563	3.8256437751227915e-12	1.4189865012931542e-10	17.186006706575252	Down	9.848021735932083
TBC1D2	-2.42546	7.07025175680674	-8.48556	3.8267173884255264e-12	1.4189865012931542e-10	17.18572813630348	Down	9.848021735932083
TMEM109	-1.61266	8.679564642083403	-8.45839	4.276745097158686e-12	1.5757776533774644e-10	17.07534896748708	Down	9.802505062686334
ARHGAP6	-2.96058	6.246555416761156	-8.45837	4.277100934251521e-12	1.5757776533774644e-10	17.07526637315674	Down	9.802505062686334
GATA6-AS1	-1.8073	7.627624158183472	-8.45739	4.2943162518515025e-12	1.5795765518667286e-10	17.07127866808512	Down	9.801459321802088
ZNF587	-1.71512	9.109245824513833	-8.41473	5.113816725178229e-12	1.8600796956335877e-10	16.897902282665605	Down	9.730468447915191
NPFF	-2.20448	5.865072727616327	-8.40051	5.420619920873363e-12	1.9551015972561948e-10	16.840067382006172	Down	9.708830669479731
AQP9	-2.7179	8.237726689072215	-8.40025	5.426327699015184e-12	1.9551015972561948e-10	16.839022728889777	Down	9.708830669479731
HOXD10	-1.76112	7.280791881636343	-8.39402	5.5665766126831995e-12	1.9993360490043784e-10	16.813693590629065	Down	9.699114203399448
ZNF542P	-2.35693	7.077396596915095	-8.36555	6.255051578515272e-12	2.2118906501522548e-10	16.69794981134637	Down	9.655236347172648
AHSA2	-1.67747	8.184093256711447	-8.35679	6.4836058350252486e-12	2.2859107373495522e-10	16.662330016891442	Down	9.640940732398048
CD302	-2.43452	7.183254361076574	-8.35676	6.484357133353118e-12	2.2859107373495522e-10	16.662215012077944	Down	9.640940732398048
RP9P	-1.93518	8.879532143757842	-8.35035	6.656859339036024e-12	2.3395128236221997e-10	16.63615608064837	Down	9.630874569957548
GIMAP8	-1.91364	6.257404330354786	-8.34861	6.704502115329842e-12	2.3526426978010956e-10	16.629077971877173	Down	9.628444025291525
RNF112	-1.86864	6.500801202322705	-8.3462	6.771276681597361e-12	2.3688079388114065e-10	16.61924175729977	Down	9.625470150123904
HTR2B	-1.80959	5.177013127223787	-8.34469	6.813254934814431e-12	2.3798543458567837e-10	16.613107717251815	Down	9.623449622240285
CELSR3	-1.42933	7.737752567344381	-8.34357	6.844572583924863e-12	2.387149026640502e-10	16.608556027224594	Down	9.62212046770152
NR1H4	-0.890148	5.709252759808162	-8.33885	6.978200662031665e-12	2.4300495121251517e-10	16.589365897443983	Down	9.614384877585358
OTUD1	-2.19904	8.764885052591767	-8.32342	7.433593698395768e-12	2.576866518569648e-10	16.526622798841125	Down	9.588908077277592
LINC00238	-1.49798	2.7888197520715328	-8.31793	7.602686170138237e-12	2.627520496776325e-10	16.50430013558109	Down	9.580453887439726
DTNA	-2.02728	7.622160265966997	-8.31445	7.711966066813019e-12	2.6612680489082206e-10	16.490136316541516	Down	9.574911380127725
LOC102724537	-1.74927	5.113943421793494	-8.30389	8.053065263984304e-12	2.7747903640767606e-10	16.447183932658614	Down	9.55676982233005
TFR2	-1.54518	6.695440526332923	-8.28293	8.775452623972893e-12	3.0147574998232684e-10	16.361930714664787	Down	9.520747615770667
LILRA2	-1.64359	6.420659537467025	-8.27832	8.942851406473318e-12	3.067518700580256e-10	16.343178563215783	Down	9.513212780994094
DDX26B	-1.56959	7.196861951982802	-8.27567	9.040491287312351e-12	3.096368265904481e-10	16.33240235843009	Down	9.509147392194945
VWC2	-2.11418	2.5263611626478695	-8.27037	9.239045957284555e-12	3.15632199941839e-10	16.31084313415281	Down	9.500818697656166
SYT16	-1.13525	5.900586656034234	-8.27026	9.243130117620182e-12	3.15632199941839e-10	16.310404554611146	Down	9.500818697656166
LOC101928943	-1.22357	4.813178116441192	-8.26905	9.289273873939614e-12	3.167351668582182e-10	16.305462811514943	Down	9.499303714573852
RGS4	-2.38419	8.459291688407184	-8.26313	9.517260167601175e-12	3.230643848287052e-10	16.281401678133136	Down	9.490710916711278
RP11-295M18.6	-0.997071	4.829291177828736	-8.25928	9.668752809604258e-12	3.2723579220552626e-10	16.26573033569582	Down	9.485139200394286
LOC101929125	-1.2975	4.818874827830765	-8.25041	1.0026579239509044e-11	3.3784699031034964e-10	16.229669030848253	Down	9.471279945608117
HBM	-1.59872	5.7191577144226775	-8.24481	1.0259444513288629e-11	3.4518504561695656e-10	16.20688635359506	Down	9.461948027402704
UFSP2	-2.16327	7.92509310739811	-8.23515	1.06742177850015e-11	3.5704010044305445e-10	16.167559136731263	Down	9.447283003991137
FAM89A	-1.96433	7.454171343003157	-8.21461	1.1611871148710107e-11	3.867074235972904e-10	16.08401390436028	Down	9.412617490723953
CHAMP1	-1.41296	7.52880396670659	-8.21391	1.1645264685107451e-11	3.87255829550252e-10	16.081164505201624	Down	9.412002035873597
ITPR1-AS1	-1.88078	5.12054506303458	-8.20183	1.2236701113211036e-11	4.055931823933114e-10	16.03200951796129	Down	9.391909353659555
OLR1	-1.74731	4.606533604129158	-8.2015	1.2253228308249878e-11	4.055931823933114e-10	16.03067031439421	Down	9.391909353659555
PLA2G2A	-1.84145	6.762121089465259	-8.20121	1.2267602701873836e-11	4.055931823933114e-10	16.02950702164839	Down	9.391909353659555
MYZAP	-1.36849	7.637234404527641	-8.19816	1.2422162836492847e-11	4.0932024380344576e-10	16.017084229124446	Down	9.387936775866049
SLC25A21-AS1	-1.94516	5.7966462140406305	-8.19794	1.2433249795990167e-11	4.0932024380344576e-10	16.01619906664434	Down	9.387936775866049
GPR34	-2.13948	6.829004852516819	-8.19793	1.2434003647160926e-11	4.0932024380344576e-10	16.01613890922917	Down	9.387936775866049
WT1-AS	-1.8282	8.058594899733862	-8.19482	1.2593468914210295e-11	4.1397410242559965e-10	16.00349489785475	Down	9.383026826814977
IDNK	-3.08783	7.150106973679262	-8.18867	1.291520649884621e-11	4.2394119008192605e-10	15.978464808391411	Down	9.372694385375084
GOLGA1	-1.27194	7.589277204957328	-8.17776	1.3506333275626264e-11	4.4207639343784445e-10	15.934061808833786	Down	9.35450267548862
BPESC1	-1.44587	4.022774684189382	-8.15587	1.477493522547043e-11	4.80164407703889e-10	15.844994250284556	Down	9.318610035263335
BC032916	-1.35612	3.7270962073337297	-8.14902	1.5195606822040215e-11	4.924366692371927e-10	15.817141718049449	Down	9.307649614850352
SYNE1	-1.97284	6.761063732351179	-8.14742	1.5295906129831998e-11	4.949859071349733e-10	15.810614862934774	Down	9.305407165795003
MGRN1	-1.62681	8.050502034788675	-8.13962	1.5793207459183663e-11	5.10357052907716e-10	15.778873383678778	Down	9.29212587909479
AP001462.6	-1.24289	5.462999566103113	-8.13145	1.6331544412919708e-11	5.25593621247192e-10	15.745620749613945	Down	9.27934991413693
CRAMP1L	-1.42573	8.351038482796389	-8.11104	1.7757384457812048e-11	5.666264979222899e-10	15.662584495921148	Down	9.246703119839676
SDPR	-2.48587	6.435973319516794	-8.09682	1.8823972443547668e-11	5.998240467074193e-10	15.604721683628345	Down	9.221976127534473
MIR29B2	-2.15938	7.7595709926961565	-8.08269	1.99476430219356e-11	6.321082059541061e-10	15.547207890261696	Down	9.199208571675948
NAP1L2	-2.33855	6.758182927195747	-8.07681	2.0434854040902877e-11	6.466514876926931e-10	15.523271419769618	Down	9.189329718947178
ARHGEF33	-1.0655	6.072781988354451	-8.07471	2.0611308257827938e-11	6.513344221420516e-10	15.51474290900709	Down	9.186195969344242
EMP3	-2.38569	7.285023945600866	-8.07426	2.0649871509088603e-11	6.516529796640525e-10	15.512888771804544	Down	9.185983614602304
LOC101930421	-0.987219	6.017160687938451	-8.07006	2.1008257234131135e-11	6.620494728094853e-10	15.495821306655618	Down	9.179109555929843
LOC286059	-1.45306	6.955485427773566	-8.06426	2.151431786878342e-11	6.76038537690521e-10	15.472210775852602	Down	9.170028546322728
LINC00857	-2.10763	6.343441695726258	-8.06396	2.1540805716001128e-11	6.76038537690521e-10	15.470990323035656	Down	9.170028546322728
LOC401324	-1.68752	4.774576532050469	-8.04477	2.3305648704982962e-11	7.294253580318814e-10	15.392883068933363	Down	9.137019142774516
AC099684.1	-1.09363	5.404982754896257	-8.03138	2.462177532840997e-11	7.653826056232223e-10	15.338395810921448	Down	9.11612141194127
FAM195B	-1.18655	7.949930805052825	-8.01101	2.6768465968817557e-11	8.287357684716873e-10	15.25548788111885	Down	9.081583916478312
LOC284294	-0.982725	5.738633971794462	-8.00568	2.736026834389577e-11	8.436328563881284e-10	15.233800503794548	Down	9.073846514434939
EPB41L4A-AS2	-1.6052	6.033138714926179	-8.00298	2.7665013848869256e-11	8.518813618415607e-10	15.222815097942284	Down	9.069620883502257
MSMB	-1.00428	4.391475082723645	-7.99391	2.8713880629871367e-11	8.829904232941223e-10	15.185910179092373	Down	9.054044006652411
TFDP2	-1.76464	8.117122163107034	-7.99237	2.8895657451689443e-11	8.87387579647252e-10	15.179651679062854	Down	9.051886654195542
RNF128	-3.92513	5.543886890956138	-7.98611	2.9647827067013916e-11	9.080490434621303e-10	15.154166854887087	Down	9.041890694728053
CFHR2	-2.35704	6.526785466817302	-7.97126	3.1510752503193564e-11	9.625293812023572e-10	15.09373281560142	Down	9.016586004781225
LINC01213	-1.08178	5.094077828654081	-7.95429	3.378333493481872e-11	1.0278310106033475e-9	15.024674946608965	Down	8.988078283390731
PLCL1	-1.47392	5.953697485675593	-7.94815	3.4645724558947387e-11	1.051272589103657e-9	14.999679249553992	Down	8.978284659239055
PGK2	-1.01535	5.266634998633554	-7.92939	3.7418837324507574e-11	1.129426885418745e-9	14.923326288144494	Down	8.947141878322151
AKAP5	-1.41306	5.180258895045745	-7.92728	3.7744307331384466e-11	1.1377496804146842e-9	14.914738866123844	Down	8.943953277811602
BC039487	-2.05528	1.673878675089833	-7.92007	3.887703539263001e-11	1.1703522272999762e-9	14.885419375276534	Down	8.93168341402171
ODF3L1	-1.53816	5.7772954066653766	-7.91445	3.9784634734028434e-11	1.192965475858239e-9	14.86253747904822	Down	8.923372124528496
ANG	-1.75941	6.474622652499863	-7.91362	3.992023277304973e-11	1.1954646670348227e-9	14.859163774032638	Down	8.922463255297743
LOC728061	-1.8582	7.745487647459515	-7.91089	4.037007632239824e-11	1.205779342271735e-9	14.848053134914268	Down	8.918732160854017
IL26	-1.97925	3.638209398170418	-7.90727	4.0974696499648586e-11	1.2222426091466234e-9	14.83331326836012	Down	8.912842580217976
P2RX7	-2.09412	7.260161288837505	-7.85967	4.9814352595924067e-11	1.4649133329590575e-9	14.63963384472006	Down	8.83418806823207
GPM6A	-4.04802	6.529314665219983	-7.8549	5.079981451902292e-11	1.4919755537621635e-9	14.62021299726748	Down	8.826238292783708
AC010145.3	-1.19892	4.961569036926535	-7.84542	5.2815259573631164e-11	1.549179902288599e-9	14.581641355444296	Down	8.809898145807939
LOC100130458	-1.885	4.381458601277458	-7.84229	5.349775803796077e-11	1.5671897645973166e-9	14.568912797689023	Down	8.804878413405243
RASIP1	-2.70492	6.913929414288111	-7.83745	5.4572323982489785e-11	1.5945851856901455e-9	14.549197866973362	Down	8.797352274986741
SPRR2C	-1.90996	6.688183671789123	-7.8077	6.165908097664391e-11	1.790226032569335e-9	14.42816700503857	Down	8.74709213186914
LOC100132354	-0.992991	5.340586710155157	-7.80032	6.355571832555302e-11	1.840538326268294e-9	14.398135788097411	Down	8.735055134634848
PIGA	-1.8176	6.0236118291947935	-7.80002	6.363328012929851e-11	1.840538326268294e-9	14.396926847646627	Down	8.735055134634848
RP11-467D6.1	-1.23788	4.05253492714563	-7.79227	6.568972433550707e-11	1.885715436727812e-9	14.365400079726989	Down	8.724523843721233
MYO1G	-0.807664	6.42352732045938	-7.79105	6.602022028781608e-11	1.890458848516826e-9	14.360425632655122	Down	8.723432771915082
LOC101928995	-2.11156	3.8252676395473606	-7.78264	6.833843345502818e-11	1.951953831482634e-9	14.326218130075862	Down	8.709530458682366
FRMPD1	-1.43241	6.05610129978325	-7.77962	6.918931671064353e-11	1.9737934875596175e-9	14.31395309351251	Down	8.704698288295054
RP11-65D24.2	-1.19801	6.293577232146952	-7.77314	7.105398423005854e-11	2.0219454044770015e-9	14.287594465089995	Down	8.694230575181457
RFTN2	-1.113	5.783264712992571	-7.76363	7.388279298503683e-11	2.0972263284176893e-9	14.248900041203374	Down	8.678354698824638
AF086184	-1.41224	6.402929386254558	-7.75501	7.654342208249449e-11	2.1646933916259475e-9	14.213835891891122	Down	8.66460360866619
ETNPPL	-1.64468	4.414243696643569	-7.71765	8.922726345182951e-11	2.5109846992797132e-9	14.061878556505548	Down	8.600155933658497
AKR1C2	-2.33528	7.890617828995554	-7.70354	9.454424864893491e-11	2.650830716714438e-9	14.004519050004385	Down	8.576618005629495
NAP1L3	-2.99462	7.118663540325733	-7.69735	9.697714061245524e-11	2.7123960881080233e-9	13.979341523407289	Down	8.56664689064598
LINC00341	-2.11796	6.818456607207822	-7.69681	9.718985141413021e-11	2.7150263864516302e-9	13.977170351388285	Down	8.56622594528889
GIPC2	-2.75145	6.175456432384698	-7.69111	9.94932361077503e-11	2.775982620620999e-9	13.953959274734329	Down	8.556583257162437
CBLN1	-1.57865	5.716046679558135	-7.68413	1.0238142877120589e-10	2.846153959728335e-9	13.92560347455116	Down	8.545741610909516
PCNX	-1.46268	8.028268871636591	-7.68293	1.0288666932996975e-10	2.856728285922789e-9	13.92072549065072	Down	8.544131065020165
DACT3	-1.40248	6.1599309891012055	-7.67601	1.0584978571056439e-10	2.9318852872542403e-9	13.892591123988698	Down	8.532853025875072
CNTN1	-1.98682	6.352927274954929	-7.66832	1.0924482806805118e-10	3.0149727640156127e-9	13.86130873196428	Down	8.520716606738143
CBFA2T3	-0.970219	6.2176358883748195	-7.6635	1.1142449332265358e-10	3.0640396427031143e-9	13.841733714152614	Down	8.513705620078651
MFSD4	-1.85225	6.466326044760897	-7.66117	1.1249536700368634e-10	3.089773711497406e-9	13.832256415972282	Down	8.510073326221335
AKT3	-2.64791	8.272123255993309	-7.65525	1.1526213184266111e-10	3.161329381683897e-9	13.808182252226676	Down	8.500130252279586
ONECUT1	-1.36852	6.588232362081082	-7.65329	1.1619158045852848e-10	3.1760420182923212e-9	13.800224530244751	Down	8.498113760592616
ZNF671	-0.906704	6.77806446211666	-7.64594	1.1975133604552507e-10	3.261655734982819e-9	13.770324931888425	Down	8.486561880293735
EPHA1-AS1	-1.40613	5.91188780144877	-7.6347	1.2540396438092418e-10	3.407502732863615e-9	13.724627352567715	Down	8.467563787183058
LOC101928623	-1.94083	7.166990881339098	-7.63323	1.26158946164844e-10	3.419893992068087e-9	13.718680462002483	Down	8.465987355748952
SH3GL2	-1.59964	6.070544214026887	-7.62648	1.2970393982619876e-10	3.491172281510119e-9	13.691224961856705	Down	8.45702871919985
PTHLH	-1.87833	5.108894546609921	-7.60788	1.3998849357878564e-10	3.754744131991837e-9	13.6156280493914	Down	8.425419652761057
PCED1B-AS1	-0.902051	5.578991784000651	-7.60415	1.4214659521970538e-10	3.808163878257189e-9	13.600472028200493	Down	8.419284370715241
TMEM102	-1.08851	5.335392018095894	-7.60244	1.4314599696626652e-10	3.8304529410423535e-9	13.593531225277529	Down	8.41674986880823
KCNT2	-2.43701	6.695371335916061	-7.59952	1.4486991731930814e-10	3.872054717696789e-9	13.581671868154508	Down	8.412058514115227
AJ420595	-2.0825	6.10050919221451	-7.5936	1.4843554174974408e-10	3.956957153670097e-9	13.55758467490633	Down	8.402638652292827
LOC100134445	-1.49218	7.8918219864868915	-7.59338	1.4856533043413666e-10	3.956957153670097e-9	13.556718861346695	Down	8.402638652292827
RFPL1S	-1.20487	5.762631715715033	-7.58147	1.5600293709839739e-10	4.140593036977069e-9	13.508327032725305	Down	8.382937452540498
OR7E19P	-1.46065	5.575421094333884	-7.57882	1.5770847869805382e-10	4.181010757975404e-9	13.497555844441216	Down	8.378718714984064
CCDC69	-2.07782	6.7385579317468185	-7.57228	1.6199900784863335e-10	4.2897862275102805e-9	13.47096664459654	Down	8.3675643494297
NUDT12	-2.19265	6.921048302418751	-7.57175	1.6235406316191852e-10	4.294218047493103e-9	13.468797969281024	Down	8.36711590717066
DIXDC1	-0.935286	7.708558026805344	-7.57114	1.6275969620765032e-10	4.299975853966318e-9	13.466326166639792	Down	8.366533983145676
FABP4	-2.71423	6.595310834579418	-7.55907	1.7102016247557826e-10	4.5077998816575525e-9	13.417287335128744	Down	8.346035372178052
SLC25A27	-1.91602	7.904208477492499	-7.53681	1.8736338160718727e-10	4.910294166999814e-9	13.326886086392498	Down	8.308892489286826
MTMR10	-1.49045	7.484925946201942	-7.52246	1.9872477297858827e-10	5.196141806830996e-9	13.268577998431258	Down	8.284319005196426
RP11-804H8.6	-1.33923	5.448673170287707	-7.51701	2.0321455992041156e-10	5.301420657262368e-9	13.246450725148453	Down	8.275607733996623
APBB1	-1.02501	7.172638808753979	-7.51507	2.0483419145191392e-10	5.33758709137624e-9	13.238588492021542	Down	8.272655025691407
CNTN4	-2.15896	6.748764671998829	-7.50931	2.0972714126717379e-10	5.453177027064125e-9	13.21520893748506	Down	8.26335040353651
LOC102724985	-0.952515	9.454397065649934	-7.50929	2.0974674521685514e-10	5.453177027064125e-9	13.21511636781774	Down	8.26335040353651
DSE	-2.26525	8.414430535261422	-7.50613	2.1247977004625859e-10	5.511705962458447e-9	13.202295070655094	Down	8.258713959149766
LYG2	-1.38043	5.33241582729022	-7.50252	2.15650717840339e-10	5.581304042385877e-9	13.187624603054587	Down	8.253264318581023
CMTM4	-1.19524	9.082121099026956	-7.50102	2.1698091832387071e-10	5.609385796985128e-9	13.181534569513676	Down	8.251084689471698
RTN4R	-1.28395	6.775115715064201	-7.48847	2.2843537427841e-10	5.886525585322232e-9	13.130588143269776	Down	8.230140964014401
KLF4	-2.15433	8.243455436628034	-7.48843	2.2847304164369691e-10	5.886525585322232e-9	13.130424861842076	Down	8.230140964014401
LOC80154	-1.60329	7.777112669168758	-7.48371	2.3294283214364044e-10	5.988201187207134e-9	13.111237929354656	Down	8.222703616975261
ZKSCAN2	-1.5479	7.2795503239825825	-7.48154	2.350220349085054e-10	6.034869962594495e-9	13.102438006038147	Down	8.219332083501362
LRRN4	-1.70569	7.413583503772727	-7.47898	2.3750084195396917e-10	6.086886043670098e-9	13.092048068359738	Down	8.215604828864459
FBXL7	-1.53382	7.18350810343906	-7.4789	2.3757984339339124e-10	6.086886043670098e-9	13.091718720510013	Down	8.215604828864459
ADAMTS9-AS2	-1.27026	7.067345495302353	-7.47046	2.45947240892584e-10	6.280163978104274e-9	13.05744240942499	Down	8.2020290164768
ENOX1	-1.22703	6.456896591153537	-7.46412	2.5242481108253113e-10	6.438380437856443e-9	13.031699746843636	Down	8.191223364838933
HRC	-1.00671	6.050905588608425	-7.4597	2.5703579414343856e-10	6.5486881227257594e-9	13.013774810429798	Down	8.183845692088294
PDPN	-2.11873	7.830893653629339	-7.45929	2.5746526481206585e-10	6.552333474566468e-9	13.012121681538122	Down	8.183604007694736
LOC100130232	-1.80937	6.254569357006505	-7.44815	2.694987110822479e-10	6.835766087417682e-9	12.966890736855332	Down	8.165212806788315
MTUS1	-1.93955	8.438751339765547	-7.44358	2.7458977132754903e-10	6.9188759671839145e-9	12.948360068521026	Down	8.159964454806309
XPO6	-2.01946	8.601082868769158	-7.43481	2.8463780529513205e-10	7.164167598841944e-9	12.912774879016505	Down	8.144834262800556
EFEMP1	-3.85485	8.580294075025991	-7.43434	2.851870494242102e-10	7.170103850303852e-9	12.910866135951544	Down	8.144474554055034
NPHP3	-1.66395	7.53999037053868	-7.43265	2.87173774105384e-10	7.212128186341473e-9	12.903992425147448	Down	8.14193656285285
RP1-272E8.1	-1.29232	4.797504674282312	-7.42938	2.9105098082499635e-10	7.285509179753931e-9	12.890713990340233	Down	8.137540090259154
HYKK	-1.50417	6.573418982014655	-7.39992	3.2839268032505607e-10	8.175512658495058e-9	12.77120151548602	Down	8.087485004689118
AX747826	-1.0693	6.628477959685371	-7.3914	3.400575983603847e-10	8.456714992268741e-9	12.73664558060022	Down	8.072798305730212
SLCO1A2	-1.27008	5.976279099865639	-7.391	3.4061801907739617e-10	8.461454569459011e-9	12.735015408657322	Down	8.072554972990623
ST18	-1.52306	6.228137316363266	-7.38284	3.5219568270523936e-10	8.739571610209515e-9	12.701925328120256	Down	8.05850985476626
ARHGAP44	-2.09625	7.440792165145877	-7.37986	3.5652621039794835e-10	8.827882216119763e-9	12.689827289472008	Down	8.05414346994066
ANTXR2	-1.87557	7.876887654234755	-7.37251	3.6741491328921193e-10	9.077846437520387e-9	12.66004606929964	Down	8.042017168134434
FAM134B	-2.3069	7.387816989826249	-7.36641	3.76721496560999e-10	9.277729945983958e-9	12.635283992932395	Down	8.032558272976548
GUCY2C	-0.936387	4.749817697672591	-7.36462	3.7949161913410705e-10	9.335901886203481e-9	12.628031664558469	Down	8.029843721069833
CSF1	-1.86335	7.714082495499079	-7.35831	3.8942915925075055e-10	9.559817311693049e-9	12.602443679857084	Down	8.01955040702115
SNCAIP	-1.7149	7.951801207300409	-7.34963	4.0352108635101196e-10	9.884538473902358e-9	12.56725739673961	Down	8.00504360383304
SOBP	-2.31222	7.1458933368744155	-7.34925	4.041413687897011e-10	9.889144787742856e-9	12.565737003269383	Down	8.004841264522497
ERN1	-2.0659	7.938481747404243	-7.33921	4.211163009182075e-10	1.0271556341905832e-8	12.525011346949425	Down	7.988363747299292
INTU	-1.42579	6.225008055321807	-7.33266	4.325666914999585e-10	1.0517208644875185e-8	12.498457628383612	Down	7.978099510276084
IPO11	-1.11844	8.206831951247988	-7.32861	4.398019019438534e-10	1.068177039763633e-8	12.482039313680936	Down	7.971356761333296
PBX3	-1.59362	7.545207743301395	-7.32485	4.4661641445502876e-10	1.0824297612623521e-8	12.466821015891338	Down	7.965600275377244
ZNF652	-1.24586	9.05440683396253	-7.32106	4.5359800641699805e-10	1.0970262990290171e-8	12.451468737967096	Down	7.959782960951928
GNAT1	-0.875252	6.407144191116618	-7.3194	4.566944251543328e-10	1.1033486539710646e-8	12.44473537804841	Down	7.957287230470623
REEP1	-1.96891	8.85241818920285	-7.31889	4.576494544929015e-10	1.1044896486648834e-8	12.442667823267625	Down	7.956838350004214
ADAMTS3	-2.53876	6.115674175770887	-7.3067	4.810786850958551e-10	1.1573711079188298e-8	12.3932540252475	Down	7.936527363365283
KBTBD11	-1.31926	5.930690887758452	-7.30437	4.856877025571288e-10	1.1671949300691588e-8	12.383817358302052	Down	7.932856607550323
SLC25A21	-1.36403	4.136958195825425	-7.30412	4.861824242125565e-10	1.1671949300691588e-8	12.38280977899904	Down	7.932856607550323
FLJ30403	-0.859882	5.23624337297707	-7.30094	4.925566556937113e-10	1.1812582521610504e-8	12.36991865246575	Down	7.927655144530943
RP11-540O11.1	-1.56326	8.724479122814728	-7.29386	5.070274735845001e-10	1.2127204130541097e-8	12.341262369103308	Down	7.916239312128887
SEMA5A	-2.20088	7.672844608418262	-7.27981	5.370608762811298e-10	1.2746281938211585e-8	12.28431334565616	Down	7.8946164794811855
TMEM150C	-2.51016	6.441841707133944	-7.27947	5.377952475631207e-10	1.2750484423830717e-8	12.282961107416476	Down	7.894473314947669
ZP1	-0.863555	5.700988013323854	-7.27809	5.408361399037696e-10	1.2797918354546808e-8	12.277381346620018	Down	7.892860664778187
ZNF732	-0.950698	4.033047324602734	-7.27494	5.478706431848452e-10	1.2949103765936025e-8	12.264593088434474	Down	7.887760288955537
PLA2R1	-1.64935	6.427735365834177	-7.26954	5.60117672089936e-10	1.3197664489954324e-8	12.242716011385866	Down	7.8795029164356
LOC101928909	-1.00863	4.043968072537663	-7.26722	5.654411278206392e-10	1.3309390497333751e-8	12.233355520919826	Down	7.875841832557302
MST1	-1.87262	8.904495225024025	-7.26587	5.685732879342184e-10	1.3369361001692684e-8	12.227889220788192	Down	7.873889349661777
PCDH17	-2.81445	7.208710932951116	-7.26358	5.739275534593017e-10	1.3481405026278612e-8	12.218614290789294	Down	7.870264843456375
UNC5D	-0.983335	5.668350065587455	-7.25875	5.853873128313669e-10	1.3708368812967085e-8	12.199050787242133	Down	7.8630142197308075
LINC00889	-1.20817	3.6577014368555463	-7.24572	6.174554095467198e-10	1.4429787860081103e-8	12.146277842049429	Down	7.840740053651717
CA11	-1.96024	6.550507990362712	-7.24118	6.290352820318678e-10	1.4655497166606016e-8	12.127893116706035	Down	7.8339994441616625
GRK4	-1.19946	5.985553816779482	-7.21692	6.94675307567705e-10	1.600860926557931e-8	12.02968698652749	Down	7.795646395408585
KIF6	-1.49948	6.553380856750085	-7.21687	6.948096070947269e-10	1.600860926557931e-8	12.02949573391583	Down	7.795646395408585
CTC-428G20.3	-1.07833	7.166965257835477	-7.20932	7.166055094954877e-10	1.6494182547029442e-8	11.998937017299587	Down	7.782669203253616
LOC100499194	-0.791247	5.894444536497848	-7.19633	7.556959762127566e-10	1.7359004256798858e-8	11.946391003230245	Down	7.76047519034503
HOXD9	-1.29913	7.633728276048477	-7.19442	7.616141161296111e-10	1.747740156763227e-8	11.938673721262788	Down	7.757523135129696
RP11-75C9.1	-1.53519	3.4223420178546147	-7.1859	7.886173717864937e-10	1.806083768678998e-8	11.904206510815722	Down	7.743262110372818
TMEM63B	-1.03628	7.62233755373043	-7.17675	8.187057759262735e-10	1.8731169447417217e-8	11.867166201571802	Down	7.72743510737087
C19orf80	-1.17102	5.742172349931048	-7.17352	8.295831557475231e-10	1.8958112704865332e-8	11.854110060996046	Down	7.722204899205725
LIN7A	-1.18676	6.701556602210716	-7.17331	8.302823082422773e-10	1.8958112704865332e-8	11.853276737295854	Down	7.722204899205725
PGR	-2.95948	7.491273413071443	-7.15718	8.868839556691437e-10	2.0190067683337652e-8	11.788042582444724	Down	7.694862225164791
BC041347	-1.49969	6.02203493125865	-7.15543	8.93240057867247e-10	2.0314551972112072e-8	11.780978946043202	Down	7.69219275139246
CCL7	-1.16931	6.15472968845056	-7.15376	8.993786960508948e-10	2.0433848249203996e-8	11.774204578116247	Down	7.6896498362059615
DPYD	-3.20186	7.897958964018816	-7.14954	9.150133318271208e-10	2.0747859285304956e-8	11.757157679486411	Down	7.683026706110437
ARHGEF10	-1.55861	8.694217037458534	-7.14389	9.363697021806752e-10	2.119011119306792e-8	11.734337447995362	Down	7.673866764364754
ZFP14	-1.12162	5.0758269353159475	-7.12952	9.930287538634098e-10	2.238374863018813e-8	11.676230935577816	Down	7.650067179958001
FYCO1	-0.827548	8.858263757923979	-7.12451	1.013579207308574e-9	2.2817611266151885e-8	11.655972308771172	Down	7.641729823030405
MGP	-3.01095	7.716444568436335	-7.11839	1.0392411099048478e-9	2.3356382469069754e-08	11.631244427696686	Down	7.631594421635921
ZNF786	-1.35319	6.020815866537718	-7.11529	1.0524592921419363e-9	2.358395312920212e-8	11.61874481791665	Down	7.627383396937948
CCDC171	-1.09524	5.653062984806545	-7.11472	1.0549159782510192e-9	2.36158734504942e-8	11.616439009391264	Down	7.6267959870885615
KGFLP2	-1.29619	5.181646767016193	-7.11232	1.0653353997999515e-9	2.38258148700128e-8	11.606718871413534	Down	7.6229522370695655
SLC2A5	-1.30723	7.709360099665214	-7.11144	1.0691586490461322e-9	2.3887969464381305e-8	11.60317606056799	Down	7.621820764770556
RP11-680F8.4	-0.978491	6.121828359183183	-7.09722	1.1330847903348314e-9	2.5242304691402733e-8	11.545746971778708	Down	7.597870995344536
LOC101060429	-0.879023	5.528849910944592	-7.09507	1.1431115093653086e-9	2.544090294043667e-8	11.537034639740575	Down	7.594467478908444
RP11-324L17.1	-1.38743	5.790301059228421	-7.08858	1.1737930180411184e-9	2.6073019863847333e-8	11.510842626445402	Down	7.583808664487585
TMEM8B	-1.04968	7.737778054966109	-7.07825	1.2243548232943146e-9	2.7064747828164855e-8	11.469139256061666	Down	7.567596015029476
RP11-359K18.3	-1.53652	4.593966391421961	-7.06803	1.2765647536817551e-9	2.800242090075252e-8	11.42784795693352	Down	7.552804420858175
RP5-856G1.1	-0.92113	5.680025419068963	-7.06528	1.2909725896080319e-9	2.82913427946764e-8	11.416750662345432	Down	7.548346439093784
RUNX1T1	-2.7484	7.652074215137554	-7.05971	1.320654187916356e-9	2.885887981407671e-8	11.39427471239206	Down	7.53972053048462
PRMT8	-1.42257	6.66810713277645	-7.05799	1.329965505963925e-9	2.900913420879392e-8	11.387327953441396	Down	7.537465232726267
RNASE4	-2.70137	7.981681311035025	-7.04544	1.3998531484159672e-9	3.0502133507246584e-8	11.33669124452814	Down	7.515669782357525
CAPN3	-1.35282	7.1767077579486465	-7.03489	1.4614333316073264e-9	3.1753212909633454e-8	11.294128467018346	Down	7.498212324597866
LAMA4	-2.77643	8.54260814579386	-7.02993	1.4913106003912902e-9	3.2371627349480385e-8	11.27412067252924	Down	7.489835467692431
ENHO	-1.51568	6.618578387467656	-7.02301	1.5340357376630651e-9	3.326749160378508e-8	11.246195505376718	Down	7.477979944057649
CXCL6	-2.38091	6.6109401088278945	-7.02231	1.538411439587679e-9	3.3330791028718293e-8	11.24337961833703	Down	7.477154379248837
DHRS4	-1.65003	8.721273247648494	-7.00901	1.624230937470102e-9	3.5057339262621195e-8	11.189715821071474	Down	7.455221048522066
RP11-252E2.1	-0.959399	5.219001252702636	-6.99848	1.695508765184416e-9	3.646556019476857e-8	11.147260289873516	Down	7.438117110288888
PPAP2A	-1.01648	9.9966868541945	-6.99844	1.695756126481466e-9	3.646556019476857e-8	11.147116085827236	Down	7.438117110288888
CYS1	-2.23069	6.46993644671641	-6.99843	1.695850170341088e-9	3.646556019476857e-8	11.14706126666723	Down	7.438117110288888
PTPRE	-1.38763	7.829144095499657	-6.99285	1.734911437380867e-9	3.7235496037370414e-8	11.124551200793594	Down	7.429042856273201
PTTG3P	-2.5328	7.408441713152307	-6.98824	1.7678164483085704e-9	3.7906159813356886e-8	11.105979091390267	Down	7.42129021072906
PATL2	-0.917884	6.235143593814136	-6.98243	1.8102159824752806e-9	3.8778962044056136e-8	11.082551894574934	Down	7.411403819408205
GCAT	-1.13884	8.664892780826905	-6.97451	1.8695865677885254e-9	3.990137228025529e-8	11.050654518832255	Down	7.399012167884829
SUCLG2-AS1	-1.81456	5.998516613144076	-6.97127	1.8944858669094015e-9	4.0357488034469455e-8	11.03757789731366	Down	7.3940758733251
RSPO2	-1.28365	4.155686656282104	-6.9643	1.949098169736464e-9	4.1405215436769335e-8	11.009489052968323	Down	7.382944951324736
MCM3AP-AS1	-1.36768	6.452715186929046	-6.95575	2.018178134640734e-9	4.2635177786191475e-8	10.975066778548918	Down	7.37023192169438
ST8SIA1	-2.22959	4.862815218924997	-6.93639	2.183895744711007e-9	4.605101450990152e-8	10.897076586265698	Down	7.336760797797234
PEG3-AS1	-1.7971	7.264593154312437	-6.93194	2.2238206601755248e-9	4.6806617188735826e-8	10.879173438872211	Down	7.329692745100989
SCN1B	-1.64249	8.059735846497274	-6.92306	2.3057716280864484e-9	4.8353573857919204e-8	10.843411849424175	Down	7.315571421282879
PTGER3	-2.09084	7.694067124875609	-6.90393	2.492589841314789e-9	5.2032812937446236e-8	10.766429096695596	Down	7.283722695145887
TBC1D2B	-1.3778	8.836470073116976	-6.90252	2.506920565424618e-9	5.2262997053437236e-8	10.760764491299664	Down	7.281805689012665
FAM13C	-2.26109	6.749005985143981	-6.89962	2.536781422088475e-9	5.2762747414511127e-8	10.749064607239514	Down	7.2776725983437185
SLC16A1-AS1	-1.4239	6.732589612771747	-6.89793	2.554263289389451e-9	5.302993629577246e-8	10.74227879553174	Down	7.275478894593885
PAPLN	-1.88143	6.520145219342265	-6.88868	2.652322043867377e-9	5.4916267910987994e-8	10.705057343674383	Down	7.260298984922864
TDRD6	-1.28226	6.36935459421308	-6.88701	2.670371015547639e-9	5.5239980528674897e-8	10.698356636288617	Down	7.257746483176146
KPNA5	-1.41351	7.534815231150238	-6.88387	2.704724822201414e-9	5.59000896180182e-8	10.685727087674213	Down	7.252587495859917
MCC	-2.49585	7.49014	-6.88256	2.719239932507503e-9	5.6149359581082284e-8	10.680439063529803	Down	7.250655192777201
GPT	-1.04286	6.123096792167542	-6.87212	2.837293084490849e-9	5.848146709915869e-8	10.638451908500674	Down	7.23298174095654
SCN7A	-1.98244	5.524885640661119	-6.86993	2.86267787305646e-9	5.8898567497894564e-8	10.62965218982215	Down	7.229895267782086
SPATA31C2	-1.71246	4.366342099778561	-6.86814	2.883633203468058e-9	5.922319933765325e-8	10.622446618877316	Down	7.227508134988639
RP11-319G9.3	-0.710505	5.127655783829699	-6.86643	2.9037481951571663e-9	5.9529439925627984e-8	10.61557914290843	Down	7.2252682034276425
ARHGAP18	-2.13875	9.574140216517076	-6.86466	2.924765862162254e-9	5.985305738856012e-8	10.608454177556403	Down	7.222913660243922
LOC101060233	-0.744846	6.067806364056118	-6.86212	2.9551311794582155e-9	6.042041667097812e-8	10.598250377848103	Down	7.218816284072957
CNRIP1	-1.48494	8.273224780301376	-6.86158	2.961609816932711e-9	6.049881339428885e-8	10.596086921096363	Down	7.218253143386645
RP11-216L13.19	-1.50662	5.273315523314084	-6.85997	2.981098611209818e-9	6.084260046910743e-8	10.589607340375425	Down	7.215792232073868
LOC101929910	-1.3079	6.398724725510021	-6.8572	3.0148064433739503e-9	6.14757189108312e-8	10.5784997176101	Down	7.211296383822569
SBSPON	-2.79064	7.931399559737446	-6.85534	3.0377799520925054e-9	6.18339568718189e-8	10.571000355841257	Down	7.208772961286795
METTL25	-1.44915	8.594856942984686	-6.85237	3.074741160259035e-9	6.253066933828133e-8	10.559053264927565	Down	7.203906922536886
SLC38A10	-1.77325	8.873461569986958	-6.84989	3.105872818296724e-9	6.310769468011613e-8	10.549101502884398	Down	7.199917684283964
TMOD2	-1.74659	6.611183339732838	-6.83344	3.320864360767673e-9	6.711842377208798e-8	10.482986544566288	Down	7.17315825115317
LINC00993	-1.01937	5.676666562269898	-6.82791	3.396377125185076e-9	6.858403552260315e-8	10.460777365423256	Down	7.163776964341591
KITLG	-1.82312	8.000658210209894	-6.81883	3.524123203733351e-9	7.091329356043568e-8	10.424307889897086	Down	7.149272343395655
RP5-968J1.1	-1.63303	6.447272467395553	-6.81487	3.581241397709351e-9	7.19361035453839e-8	10.408427747539282	Down	7.143053089655784
OR8B8	-1.14852	6.119668113176831	-6.80827	3.678743251671322e-9	7.376508926817544e-8	10.38189699804344	Down	7.132149127680589
LRP2	-2.8966	7.194636188236283	-6.80422	3.739823006863838e-9	7.47278694969762e-8	10.365633179188244	Down	7.126517399369638
SLC4A9	-0.766192	6.15135138604706	-6.7956	3.873082042856688e-9	7.725566177726083e-8	10.331054124751564	Down	7.1120696829255365
BRMS1	-1.43942	8.150056499194669	-6.79309	3.912806143880884e-9	7.791217734190666e-8	10.320976439044308	Down	7.108394658642151
STAMBPL1	-1.86348	7.415707350510392	-6.78043	4.1193523002736414e-9	8.166955050083246e-8	10.270174982797478	Down	7.087939834708367
RP11-326I11.5	-1.28426	5.521886071604369	-6.77728	4.172537163803859e-9	8.258086312341566e-8	10.257506641029526	Down	7.083120582253546
CELF2	-2.25231	9.109283719930836	-6.7749	4.21301891373579e-9	8.330999112131475e-8	10.247972000196803	Down	7.07930291181461
SMAD3	-1.30963	8.479059799944134	-6.77411	4.226611197699171e-9	8.350659550272829e-8	10.244791175916006	Down	7.078279221794004
RP11-445L13__B.3	-1.34754	5.8119989150966855	-6.77383	4.23133692891079e-9	8.352783226622087e-8	10.243687673684754	Down	7.078168789359551
KCNQ4	-0.778223	5.824918332071618	-6.77096	4.280968366683075e-9	8.44347200528811e-8	10.23217223464037	Down	7.073478932204653
SYTL5	-1.75375	5.023557529085948	-6.76878	4.319014847770846e-9	8.51117490974584e-8	10.223434871089689	Down	7.070010484380865
RAET1E	-0.736798	6.165899595664303	-6.76649	4.359354317486894e-9	8.575895737728517e-8	10.214254690207303	Down	7.066720507595851
POLD1	-1.68138	7.634539438091825	-6.7658	4.371559463686069e-9	8.592517952721097e-8	10.211493880182612	Down	7.065879551799458
C16orf62	-0.982637	8.378052747679744	-6.76073	4.462669017317095e-9	8.74155859993132e-8	10.191125445932524	Down	7.0584111267475205
FCGR3A	-1.12367	5.589306951412182	-6.756	4.549215515338452e-9	8.895854852600723e-8	10.172159086895393	Down	7.050812311781446
CA3	-1.19864	5.626521405381825	-6.75278	4.608981080506716e-9	8.997344551272456e-8	10.1592713793702	Down	7.045885647993504
FGF21	-1.03437	6.149563768516544	-6.75184	4.626719459599617e-9	9.008911873717416e-8	10.155478502806083	Down	7.045327661382547
EMILIN2	-1.64228	8.024495676298798	-6.74929	4.674743378457102e-9	9.086954439738322e-8	10.14528248389902	Down	7.041581649411975
TRAPPC10	-1.55894	6.848550672592641	-6.7419	4.8172493269441605e-9	9.332247870546609e-8	10.115632925255124	Down	7.030013734582422
TWIST2	-1.85284	6.216064524576367	-6.74156	4.8238416711298364e-9	9.337112825192857e-8	10.114282670756136	Down	7.029787393355228
AK055910	-1.3158	4.835615225360373	-6.73602	4.933607703468088e-9	9.531092233148979e-8	10.092067704418415	Down	7.020857327730093
PLSCR2	-1.05417	5.818752531659133	-6.7332	4.990392643551393e-9	9.626913431012844e-8	10.080768756787716	Down	7.0165129335138525
PIP5K1B	-1.42824	7.188189596101246	-6.72998	5.056083333355067e-9	9.745419594257e-8	10.0678572559307	Down	7.011199457362425
C10orf54	-2.02001	7.978429236127034	-6.72476	5.164215599081901e-9	9.94546201106017e-8	10.046965283743258	Down	7.002375037155592
DPH6	-1.26176	7.395336375133947	-6.71479	5.377448016481998e-9	1.0321361843044601e-7	10.007020625722545	Down	6.986262996323227
RP11-499E18.1	-1.35296	6.637083749745872	-6.71101	5.460678168212368e-9	1.046355576302603e-7	9.99185795379314	Down	6.980320706879314
HSD17B6	-2.28993	6.570099185797634	-6.70222	5.658917499271028e-9	1.0834340875800993e-7	9.95665540585378	Down	6.9651975045296455
LINC01279	-3.05639	7.828864331759689	-6.69881	5.737543513045076e-9	1.0975690471150359e-7	9.943034145255368	Down	6.95956814913795
CDK2	-1.01718	6.779267745357195	-6.69778	5.761674264953511e-9	1.1012643734993428e-7	9.938891167699357	Down	6.9581084102114845
LOC100272216	-1.68235	7.582397932111184	-6.69151	5.910037779098433e-9	1.1267979528999421e-7	9.913794419550795	Down	6.948153950686146
BC062753	-1.47834	7.293729191700627	-6.68527	6.061434295538116e-9	1.1547007098053003e-7	9.888826665599652	Down	6.9375305672207945
CORO2B	-1.10554	6.675000428680508	-6.68279	6.122761401302903e-9	1.1644443732369837e-7	9.878890065373632	Down	6.9338812533493535
GNG11	-3.27633	7.427430830575428	-6.67012	6.445564392865021e-9	1.2192319368286852e-7	9.828177251881208	Down	6.913913669850595
NBEA	-2.29208	6.473712889944072	-6.67002	6.448143028815548e-9	1.2192319368286852e-7	9.827782467139496	Down	6.913913669850595
IL18RAP	-0.827297	6.253402709672995	-6.6665	6.540686750477402e-9	1.2344289385339637e-7	9.813717832252582	Down	6.908533905724639
FER	-1.57516	7.646527917396903	-6.66619	6.549022787167857e-9	1.2344289385339637e-7	9.812460732754849	Down	6.908533905724639
DNM1	-1.54897	7.380118984929053	-6.66582	6.558826406147161e-9	1.2344289385339637e-7	9.810984365831686	Down	6.908533905724639
NEURL4	-1.33443	6.913942099533713	-6.66576	6.560281557510018e-9	1.2344289385339637e-7	9.810765416996194	Down	6.908533905724639
TMEM52B	-1.6032	4.827266026880673	-6.66574	6.560888103751473e-9	1.2344289385339637e-7	9.81067416758857	Down	6.908533905724639
SUZ12P	-2.03635	3.5622364290209516	-6.66292	6.636373607113102e-9	1.2455585870150997e-7	9.799383489315726	Down	6.904635839850512
TSHZ3	-1.41747	7.183076551779011	-6.66208	6.6589912985512444e-9	1.2487791960619174e-7	9.79602549477531	Down	6.903514344979888
LOC286161	-1.65475	6.851541510443978	-6.64358	7.177266656167151e-9	1.3426711678368626e-7	9.72205552963322	Down	6.872030336907024
FFAR1	-0.666428	6.488799885098036	-6.64255	7.2074667597256e-9	1.3472192156516506e-7	9.717911756897053	Down	6.870561731372957
TECRL	-1.48322	2.653892341329003	-6.63897	7.3127409928960604e-9	1.363555021813113e-7	9.703601730968009	Down	6.8653273328322175
FRY	-2.55575	8.236284407960806	-6.63167	7.532121303514775e-9	1.3976269529855194e-7	9.674432528617416	Down	6.854608732653051
ZNF300P1	-1.59909	6.244977773868313	-6.62548	7.72318742372536e-9	1.427292448040489e-7	9.64971290705056	Down	6.845487032100842
LOC101930052	-1.34048	8.34627636214203	-6.61702	7.992393176164479e-9	1.474660995786025e-7	9.61590358864164	Down	6.83130780652038
AMDHD1	-1.31923	4.785976595987853	-6.61368	8.101030455634127e-9	1.491097954903083e-7	9.602581760948649	Down	6.8264938254427
RP11-36B6.1	-1.14462	5.792645917399696	-6.61138	8.176917071027998e-9	1.502648077655017e-7	9.59338173366006	Down	6.8231427198978025
LOC100288123	-1.41116	4.2950457571292	-6.61033	8.211947839220919e-9	1.507874435100605e-7	9.589163621818518	Down	6.821634821870347
LOC100129406	-0.900795	5.616614734345379	-6.60899	8.256503123862924e-9	1.5148398955161178e-7	9.58382460270528	Down	6.819633265622546
RNU2-22P	-1.25583	5.54337728417795	-6.60059	8.541877823106947e-9	1.563436981718911e-7	9.550297751202589	Down	6.805919619405574
KIAA0825	-1.34331	4.455854201019987	-6.59917	8.591181970001773e-9	1.571204254929421e-7	9.5446191477179525	Down	6.803767353456141
SLC17A8	-2.62447	3.2001794242164823	-6.59852	8.613877572389324e-9	1.5740966851333497e-7	9.54201614116845	Down	6.802968595655285
CTD-2035E11.5	-1.01612	5.150179314620858	-6.59299	8.808724387073893e-9	1.6058550219272e-7	9.519947232500344	Down	6.794293665794022
C6orf147	-1.40237	4.986833227736242	-6.58453	9.115439149553673e-9	1.657807093025743e-7	9.486179282163077	Down	6.780466006541231
ELOVL4	-1.48629	5.454571918583113	-6.58365	9.147923031779358e-9	1.6610740559053962e-7	9.482669796174758	Down	6.779611004903144
LYRM9	-0.782707	6.4708052448996085	-6.58173	9.219316478433512e-9	1.6727100849332304e-7	9.475000256450102	Down	6.776579324682768
POLI	-1.34158	7.584152596076812	-6.5794	9.306697403352048e-9	1.68589018124538e-7	9.465693772006489	Down	6.773170718698518
CAV1	-2.33248	9.663374017788588	-6.56625	9.815040811863588e-9	1.7751645749772884e-7	9.413229678859146	Down	6.750761377430731
CACNA1C	-0.840539	5.917057178605233	-6.56511	9.860422912934424e-9	1.7810198791103907e-7	9.40867902369833	Down	6.749331233069173
METTL2B	-1.4481	6.350758401256948	-6.56284	9.951076063668597e-9	1.794095108437146e-7	9.399651301232277	Down	6.746154537894722
CADPS2	-2.05973	7.997630414513307	-6.56058	1.0042623730105096e-8	1.8063300968637936e-7	9.39061768761605	Down	6.743202881848324
CLDN22	-1.59728	7.94677558113563	-6.55747	1.0169740619387937e-8	1.826322571671716e-7	9.378210024245613	Down	6.7384225133709315
LRRC2	-1.24226	5.452606173382613	-6.556	1.0230114973884517e-8	1.835723925392187e-7	9.372371279250032	Down	6.736192631791652
LOC101927122	-0.934198	7.316212512760813	-6.55087	1.0444663636264985e-8	1.872754383496133e-7	9.35189808050706	Down	6.727519177716595
RAB33A	-1.08895	6.006372264001668	-6.53694	1.1049126206943676e-8	1.9780356689253866e-7	9.296405629967822	Down	6.703765881253601
SIRPA	-1.85727	7.764108004495542	-6.53426	1.1169813968188325e-8	1.9980779810647434e-7	9.285690740818191	Down	6.699387566117431
LOC100288860	-0.807827	6.4688620687364224	-6.5321	1.1267636205181008e-8	2.0108599745580057e-7	9.277090617681036	Down	6.696618170275488
FLJ35934	-1.24859	5.1111072301339595	-6.52911	1.1404462866455144e-8	2.032108301570306e-7	9.265185983580205	Down	6.692053149970313
TMEM194B	-0.739227	5.99552492655554	-6.51718	1.1967478040666428e-8	2.127458664276668e-7	9.217660828989333	Down	6.672138869340176
FAM155A	-2.7101	6.2610254446475135	-6.51013	1.2312870914263758e-8	2.178702039036663e-7	9.18960135841101	Down	6.66180216013943
RP1-102H19.8	-1.11138	4.434408215524397	-6.50327	1.2658885885164164e-8	2.236468341055374e-7	9.16227078293645	Down	6.650437245223168
TRPM4	-1.47141	6.09361603908928	-6.48774	1.3477905880144892e-8	2.3647316612870787e-7	9.1004502342597	Down	6.626218133841243
PHACTR1	-1.65198	7.315500594733483	-6.478	1.4017763722615576e-8	2.4575664077373314e-7	9.061725452625248	Down	6.609494737941721
DDI1	-1.07246	5.960262678598252	-6.46744	1.4627570965822882e-8	2.5566401537590656e-7	9.019740100586354	Down	6.5923303944744
LINC01116	-3.1926	7.485664056427351	-6.461	1.5012529652409617e-8	2.6219211138738906e-7	8.9941287951394	Down	6.58138037913131
HEIH	-1.29258	8.225957725342075	-6.45991	1.507892436096178e-8	2.6315080888973653e-7	8.98977814002863	Down	6.57979529068258
OR10H2	-0.822215	4.918153777744244	-6.45851	1.5164177283316053e-8	2.642355004303031e-7	8.984219805144399	Down	6.578008834695572
CEP104	-1.16427	7.633650804452151	-6.45821	1.5182567413354982e-8	2.6435461175810397e-7	8.983024905918565	Down	6.577813108774564
CCNL2	-1.25066	9.926130143260202	-6.45607	1.5314266312279683e-8	2.662424764123457e-7	8.974509886493369	Down	6.57472265584905
SLIT1	-0.811314	6.4091963669334095	-6.45531	1.5360959670492545e-8	2.6685147782930825e-7	8.971508515495671	Down	6.573730387721414
LINC00620	-1.07948	5.867506209548379	-6.45097	1.5632101295659034e-8	2.7093871037705057e-7	8.954258536476686	Down	6.567128940695507
FLRT3	-2.04845	8.30343381546292	-6.4506	1.5655447140104934e-8	2.7093871037705057e-7	8.952787314765278	Down	6.567128940695507
RP4-621B10.8	-1.59613	2.812786430066483	-6.44567	1.5969946180564848e-8	2.761726369351044e-7	8.933179410197393	Down	6.558819353334451
CELF6	-1.08686	5.789765250268078	-6.44526	1.5996361778135703e-8	2.764205144425731e-7	8.931550133041856	Down	6.558429729103193
TCEB3-AS1	-1.21962	7.55536478626884	-6.44476	1.6028181375448682e-8	2.76761329576521e-7	8.929591118424241	Down	6.557894591689156
MAD2L1BP	-1.02367	7.607663988837994	-6.43922	1.6390076539951248e-8	2.8215843578445793e-7	8.907580638398418	Down	6.549506960953487
PPM1E	-1.29937	5.9705018450147405	-6.43711	1.6530013262467562e-8	2.841398748549927e-7	8.89919990103947	Down	6.54646781515313
AKR1C1	-1.54783	8.617507159024678	-6.43272	1.6825515765745643e-8	2.8872171110052356e-7	8.88173341355579	Down	6.539520557107758
ALDH1A3	-1.47491	9.08564820793256	-6.43258	1.6834422947161082e-8	2.8872171110052356e-7	8.88121171183985	Down	6.539520557107758
AMBN	-0.877199	5.968371824888233	-6.42447	1.7393777217646554e-8	2.969792753451758e-7	8.848991632089245	Down	6.527273856801559
CFD	-1.43207	7.998299670304354	-6.42351	1.7460889912157593e-8	2.976808497021263e-7	8.845195703317977	Down	6.526249103331799
MIR4435-1HG	-1.34663	6.448231663784781	-6.41362	1.8170443449789863e-8	3.088570398868814e-7	8.805933852044575	Down	6.510242495186959
ZFPM2	-2.98611	7.617359640458384	-6.41079	1.837881367983336e-8	3.1193536957040613e-7	8.794695408074368	Down	6.505935378887101
LHX8	-1.24893	3.687807912277526	-6.40402	1.8886884991194506e-8	3.1984681103888905e-7	8.767818789059682	Down	6.495057974960855
TAPT1-AS1	-0.910872	5.94315979093535	-6.39228	1.9800359386047224e-8	3.340799575172378e-7	8.721268933772595	Down	6.476149578240235
MYT1	-1.3065	7.365860476335658	-6.39062	1.9933185311338193e-8	3.360732105660328e-7	8.71467993751796	Down	6.47356610510578
SCNN1G	-0.679404	5.649289537422384	-6.38856	2.009909219518981e-8	3.3837169266648097e-7	8.706511406078988	Down	6.4706059761086685
LINC00838	-0.864053	4.852732508705411	-6.37619	2.1124630612427873e-8	3.54593120896359e-7	8.657469944410508	Down	6.450269693962769
IGLVIVOR22-2	-1.10523	5.372126781748905	-6.3743	2.128602633573393e-8	3.570403200405107e-7	8.649969793261231	Down	6.447282736878468
LL0XNC01-116E7.2	-1.09136	5.5117965440310766	-6.37154	2.1524147400803823e-8	3.605058333696858e-7	8.6390075294305	Down	6.443087703538813
RNASEL	-1.75334	7.823532275229621	-6.36879	2.1762705722269808e-8	3.6396852647646995e-7	8.628146253345378	Down	6.4389361695613
GAS1	-2.17393	10.144678547202112	-6.35761	2.2763935714525823e-8	3.798804414388303e-7	8.583825497663007	Down	6.420353065997404
RP11-305O4.3	-1.44778	3.7089413093587065	-6.35205	2.3277801497347182e-8	3.878898910836169e-7	8.561830976533365	Down	6.4112915385329945
LOC101928886	-1.68286	5.72903092184348	-6.3455	2.3899482308428717e-8	3.965165016204065e-7	8.53586273799693	Down	6.401738734163378
C11orf80	-1.64925	6.795694663459116	-6.33548	2.4881293500420293e-8	4.119096338611547e-7	8.496198488833592	Down	6.38519805052037
GLI3	-1.58997	7.573372782817409	-6.32158	2.6309720002870362e-8	4.333621914655658e-7	8.441205537523235	Down	6.363148981235243
BC052775	-0.963878	5.289397304270792	-6.31966	2.6512792172949527e-8	4.363929295862678e-7	8.433631231115449	Down	6.360122294441496
LOC101927406	-0.643826	5.589224350390951	-6.31062	2.749285612653681e-8	4.505795525207991e-7	8.397874495458009	Down	6.346228520621236
LRP1B	-2.01797	4.3616138629862835	-6.30882	2.7692733437538012e-8	4.529405643610251e-7	8.390739062196236	Down	6.343958783116409
MSL3	-1.11196	8.403312425737203	-6.30666	2.7933529470832815e-8	4.556677631763834e-7	8.38221105504648	Down	6.341351695073099
AQP8	-0.719231	5.28438472919675	-6.30658	2.7942736646552123e-8	4.556677631763834e-7	8.381886437871376	Down	6.341351695073099
SOCS2	-1.38842	6.729169684930983	-6.30522	2.8096163895358653e-8	4.57843400115321e-7	8.376492766317561	Down	6.339283041855393
FGF9	-2.51885	7.825990792280604	-6.29251	2.9566273254540706e-8	4.807723992826131e-7	8.326258205673163	Down	6.318060472751007
LOC101927066	-1.14718	4.180298818495753	-6.29052	2.980323574075832e-8	4.842772566887109e-7	8.318395885755244	Down	6.314905926424295
TEF	-0.68589	7.322511073473899	-6.28931	2.9947389694305236e-8	4.859335665361769e-7	8.313643486198195	Down	6.313423100406149
STAG3L2	-1.61217	6.511392378097515	-6.27516	3.1696723158899235e-8	5.125012926872476e-7	8.257731482778368	Down	6.290305034845417
AFAP1L1	-1.28648	6.404120244265191	-6.27229	3.206327852766549e-8	5.17331276046868e-7	8.246407984647636	Down	6.286231264865668
FAM78A	-1.18953	6.1386782404781215	-6.26902	3.24862207293617e-8	5.23785936622316e-7	8.233502609063493	Down	6.28084616633331
COX18	-1.62279	7.164813786383187	-6.26746	3.269011233201851e-8	5.263315130501418e-7	8.22734119207145	Down	6.278740626687896
TMEM132B	-1.71965	6.9727555472200144	-6.26617	3.2859129278380986e-8	5.286807445570172e-7	8.222262762172775	Down	6.276806507043197
FCGR2B	-1.69493	7.196147396842542	-6.26413	3.3129119158075896e-8	5.322760654618106e-7	8.214204438160515	Down	6.2738630620473534
TNFAIP8L3	-1.35428	5.123329969549459	-6.25853	3.3881122398446174e-8	5.43213874810126e-7	8.192101611159437	Down	6.265029145803182
WDR17	-2.89997	5.152940574787371	-6.24355	3.5977861199666145e-8	5.74816680437962e-7	8.132976007544478	Down	6.240470637689773
LOC283713	-1.31278	5.021654377727185	-6.24247	3.6133964875125833e-08	5.769078732575044e-7	8.128713075324644	Down	6.238893534037253
PCSK2	-1.34297	5.380280255539764	-6.24226	3.616324241784456e-8	5.769726801100876e-7	8.127915608762983	Down	6.23884475037691
PLXND1	-1.20314	8.605705663634001	-6.24158	3.6262212780058395e-8	5.781485478710495e-7	8.125224617169106	Down	6.237960560832025
MIR4800	-1.08592	7.5810630051987955	-6.24117	3.632137980100613e-8	5.786886131387321e-7	8.123619384495804	Down	6.237555063168972
LOC101929759	-1.79976	6.334157785510219	-6.23976	3.6527865423879746e-8	5.815734398280755e-7	8.118037766915709	Down	6.235395435710743
MCOLN2	-1.78264	7.175848610238258	-6.23708	3.69220237060836e-8	5.866242919246434e-7	8.10747026792151	Down	6.231639956987258
PTGFR	-1.02715	4.613387891615459	-6.22937	3.8079646545054174e-8	6.016741942709216e-7	8.077075075894662	Down	6.220638614943572
TMEM55A	-1.07619	7.219266193614847	-6.22464	3.8806724382155136e-8	6.118945879664558e-7	8.058454136036588	Down	6.213323387997498
RP6-99M1.2	-2.0021	4.303107201323967	-6.22166	3.927321537229376e-8	6.183977250534818e-7	8.04669012543069	Down	6.2087321167587755
AGBL1	-0.91953	5.849492120518571	-6.21386	4.0518838807520496e-8	6.362597893460956e-7	8.015950830323597	Down	6.196365522649237
CTRB1	-0.607905	5.87837391381048	-6.20983	4.1177550129204045e-8	6.452747735657939e-7	8.000075720787624	Down	6.190255312911351
NR3C2	-1.16196	7.348299134208617	-6.2089	4.1331056092771256e-8	6.472369831256082e-7	7.9964127399693	Down	6.188936675097132
FRAS1	-2.78678	8.61488843183759	-6.20707	4.1634035805234553e-8	6.515356396634482e-7	7.989222814638185	Down	6.186061822950889
LOC101927965	-1.0558	4.918447484503476	-6.20404	4.214137288470981e-8	6.581245530575262e-7	7.97729988771576	Down	6.181691906406379
ABHD3	-1.31106	7.214882939963412	-6.19895	4.300799022857125e-8	6.702859730514181e-7	7.957262221380417	Down	6.17373986891018
HS3ST1	-1.95567	6.398028536039554	-6.18783	4.496466613941761e-8	6.983413615104729e-7	7.91346906573104	Down	6.155932234711395
ST3GAL5	-1.23115	8.866236624103713	-6.1871	4.5096015271624266e-8	6.990187895660511e-7	7.910598027231264	Down	6.155511150298411
RP11-138A9.1	-1.48731	7.653845849540418	-6.18067	4.626914601690873e-8	7.162326060357611e-7	7.885320983061361	Down	6.144945911892845
RTN4RL2	-1.09406	4.66064541705204	-6.17462	4.740265199551243e-8	7.317984311776848e-7	7.861500250127254	Down	6.135608525884673
LOC149351	-0.937042	3.9417458777153023	-6.17302	4.77068499770741e-8	7.359979909814418e-7	7.855204579500456	Down	6.1331233711337845
SDR16C5	-2.33532	4.957723216219547	-6.16914	4.8451159361739875e-8	7.464741246042064e-7	7.839968367146068	Down	6.126985241838988
TMEM98	-2.42989	8.225157123000885	-6.16409	4.943921600653608e-8	7.591408208144558e-7	7.820100822706402	Down	6.119677654895139
ANKRD22	-1.33659	8.32248870904002	-6.16333	4.958851266362852e-8	7.609225896922582e-7	7.81713344451154	Down	6.118659522703142
XKR6	-0.871429	6.395706731207823	-6.1482	5.2678199291514427e-8	8.067098538089413e-7	7.757653729530959	Down	6.093282638199328
LOC440354	-0.818398	5.3359517600296815	-6.14243	5.390536019769034e-8	8.227489899686171e-7	7.734993882438709	Down	6.084732642186218
TSPAN8	-3.22868	6.728008219385728	-6.12576	5.761223471619477e-8	8.749554056925904e-7	7.669557611638244	Down	6.058014081326452
LOC339593	-0.801216	4.7877413002255365	-6.12568	5.76317931893323e-8	8.749554056925904e-7	7.669223657985834	Down	6.058014081326452
BBS12	-1.42658	6.99464029019322	-6.12393	5.8033817873719256e-8	8.804746148095641e-7	7.662384270307572	Down	6.055283160772291
TTBK2	-1.28486	7.60461080663069	-6.12276	5.830606954177179e-8	8.840189297854186e-7	7.65777952664721	Down	6.053538435198092
DGUOK	-1.18566	9.614375575397537	-6.11719	5.961530672707603e-8	9.03270597754154e-7	7.635932288356167	Down	6.044182126201708
BC045789	-1.24006	5.269604823149972	-6.1162	5.985192255757906e-8	9.062555500958646e-7	7.632035212301461	Down	6.042749320703844
LOC100289473	-0.821994	6.61141935213516	-6.1133	6.05490612380307e-8	9.155994527857928e-7	7.620642382897743	Down	6.0382944755564525
FOXL2	-1.97094	5.583870351590616	-6.10682	6.213295366451248e-8	9.358392672089408e-7	7.595238930806734	Down	6.028798736046617
TNN	-0.900873	5.172755360189286	-6.10587	6.23673049842015e-8	9.387510333773328e-7	7.591535445976425	Down	6.027449571916056
FAM226A	-1.05176	5.528507171677693	-6.10486	6.26200669904797e-8	9.419359057693523e-7	7.587556607849511	Down	6.025978647862872
C19orf84	-1.23733	8.61137459813273	-6.10412	6.280447704771607e-8	9.440891132553852e-7	7.584663865034705	Down	6.024987010396322
ARMCX5-GPRASP2	-1.86129	8.994262234433315	-6.09967	6.392829861245033e-8	9.584636592098632e-7	7.567216912331344	Down	6.018424349039257
CTC-471J1.2	-1.1825	5.36931647366667	-6.09885	6.413902627269465e-8	9.609933085088282e-7	7.563979667159107	Down	6.01727963635623
RNF216	-1.37227	8.02159516565912	-6.08778	6.702949125105963e-8	1.0029873972092829e-6	7.520620313808014	Down	5.9987045239654755
IRAK4	-0.804121	6.770606140145697	-6.08672	6.731261356826232e-8	1.006565546292989e-6	7.5164744122707345	Down	5.997157939139473
STX11	-0.937783	5.985396116505011	-6.07179	7.143808443811017e-8	1.0606307163267505e-6	7.457968615168823	Down	5.974435799678285
RP11-320H14.1	-1.30136	4.002358868876003	-6.07074	7.173754328520213e-8	1.0636962105133762e-6	7.4538544920647984	Down	5.9731823879582295
RPUSD4	-1.46943	8.280716952853428	-6.06661	7.292634960023123e-8	1.0796740699824994e-6	7.437690019055933	Down	5.96670732874574
AMZ2P1	-1.37584	6.351344376552318	-6.0665	7.295669007355848e-8	1.0796740699824994e-6	7.437280935513045	Down	5.96670732874574
LOC100130331	-1.66295	5.433652883278375	-6.06202	7.426914229345017e-8	1.0969681772316632e-6	7.419746227402697	Down	5.959805971015215
CEP83-AS1	-0.945218	5.73221958157621	-6.05545	7.623731222681234e-8	1.1224153580677218e-6	7.394024323906035	Down	5.949846399465057
HAB1	-1.32896	7.269878826560269	-6.05298	7.698923954911777e-8	1.13202879925724e-6	7.384372652409007	Down	5.9461425243850226
BC015159	-0.701157	5.853228815347118	-6.04486	7.951868241462032e-8	1.1647297919104344e-6	7.3525843375686195	Down	5.9337748158339565
RBM6	-1.80309	8.135945201036838	-6.03838	8.159246941474934e-8	1.192052431507056e-6	7.327269132140942	Down	5.923704642067754
NSUN6	-1.30699	7.23157611503523	-6.02747	8.520866433763926e-8	1.239344584476064e-6	7.284629520132513	Down	5.906807926610014
CRYGA	-1.37904	5.755251608588977	-6.02622	8.563178533731251e-8	1.243127929398714e-6	7.279759301295994	Down	5.905484176126604
SPRR3	-1.46607	7.6431849453838145	-6.02378	8.646805756872656e-8	1.2536772427851045e-6	7.270204126018316	Down	5.901814257539883
LRRC37A2	-1.11542	8.672729128626106	-6.01991	8.780914612353068e-8	1.2715097811140871e-6	7.255072564258486	Down	5.8956802946565485
CXCR2	-1.58782	5.545894082281428	-6.01809	8.844598191152244e-8	1.2783042452013403e-6	7.2479680053052595	Down	5.893365768801503
IPO5P1	-1.16709	7.53313302344243	-6.01002	9.132730732096734e-8	1.3174511123558714e-6	7.216451461586609	Down	5.880265491506689
LOC101928865	-0.873186	4.702603766565699	-6.00801	9.205809434760792e-8	1.3271563582727923e-6	7.2086163171771185	Down	5.877077907930751
LOC101928251	-1.43437	6.549857520168635	-6.00731	9.231456795420762e-8	1.3291787289013947e-6	7.205881294893916	Down	5.876416617434454
LOC102724891	-0.919567	6.098673716810242	-6.00699	9.24300260857344e-8	1.329308818950896e-6	7.2046525387489995	Down	5.876374114026273
CPEB1	-0.827546	6.791021294379026	-6.00146	9.448299484543224e-8	1.3569845819639952e-6	7.183057001158789	Down	5.867425086758832
LINC00254	-1.28068	4.979500674387768	-5.98923	9.918094649823585e-8	1.4182255468332112e-6	7.135356706252705	Down	5.8482546958414945
TMEM200A	-2.4113	6.8762358744248715	-5.98724	9.997040941842092e-8	1.4277297110387344e-6	7.127563708384257	Down	5.845354002724409
PKHD1L1	-3.64892	6.664171705962244	-5.98631	1.0033666735526005e-7	1.432066508060508e-6	7.123969192003501	Down	5.844036812047051
RASSF3	-2.17752	8.348694976951979	-5.98609	1.0042592691203129e-7	1.4324468714590797e-6	7.123095175993698	Down	5.84392147676723
BCMO1	-1.17778	4.796833254611778	-5.98542	1.0069502150699285e-7	1.4344965112443893e-6	7.120464944664705	Down	5.843300503639072
MGAT4C	-1.6622	4.204237965035839	-5.98281	1.0174017337632705e-7	1.4466832981211846e-6	7.110315597438494	Down	5.839626532414015
CEP120	-1.38874	8.213119915052111	-5.97837	1.0355107063970505e-7	1.4687817390984572e-6	7.092974985277734	Down	5.83304273555601
U2AF1L4	-1.45745	7.585256538994207	-5.9761	1.0448416957765905e-7	1.4810987086538172e-6	7.084158146581946	Down	5.829415996715027
LOC101929690	-1.13888	4.646803561056028	-5.97147	1.064211414753747e-7	1.5057571402690768e-6	7.0661048581277965	Down	5.822245068737089
SLIT2	-2.12289	8.428911960766031	-5.96691	1.0836111052916999e-7	1.5313118269282767e-6	7.04835062232882	Down	5.8149363632372095
SMEK3P	-1.32452	3.517164183349891	-5.9658	1.0883982729324313e-7	1.537127412742043e-6	7.044018482990928	Down	5.813290132267737
FPR3	-1.411	7.083964740390961	-5.96415	1.0955656779030159e-7	1.5453419941271946e-6	7.037567908188552	Down	5.810975393439034
TXNDC8	-0.753237	6.087678990303501	-5.95973	1.1148974407554439e-7	1.5687416080592742e-6	7.020378141265767	Down	5.804448584415236
BEAN1	-1.21639	5.9225389886237645	-5.94774	1.1691603004350965e-7	1.6396548872836649e-6	6.9736776031265775	Down	5.7852475521477755
KCNG2	-1.64389	5.177370879993624	-5.94765	1.1695951641448233e-7	1.6396548872836649e-6	6.973312182064084	Down	5.7852475521477755
LOC400590	-1.06022	3.7476832777820777	-5.94541	1.1799818634250892e-7	1.6521912517321064e-6	6.964624334566541	Down	5.781939681734532
TMX4	-1.64661	9.213628981760916	-5.93695	1.2202187060285424e-7	1.7043579838355936e-6	6.931676919739702	Down	5.7684391806516295
RP11-506O24.2	-1.47942	5.552028898975082	-5.93271	1.2408628425582985e-7	1.728970826729069e-6	6.915192839184187	Down	5.762212334602002
CCDC84	-0.788378	9.098526586821809	-5.92723	1.2680715637665254e-7	1.7647329262417477e-6	6.893881832538113	Down	5.753321011202991
OTUD7A	-0.916994	6.099375830898793	-5.92608	1.273878045927149e-7	1.7717359156697414e-6	6.8893933009800525	Down	5.751601010956018
GUF1	-1.03836	6.787523901308479	-5.92367	1.2860852666378826e-7	1.785457816468939e-6	6.880023336744446	Down	5.748250406065533
LOC399884	-0.608909	6.0783496542442865	-5.91926	1.3086885365754085e-7	1.8146354562611371e-6	6.862906509432752	Down	5.741210607672272
LOC101927143	-1.23338	6.440529333878571	-5.91558	1.327874955152236e-7	1.8401242337327683e-6	6.848608001924146	Down	5.735152855140873
LOC100507311	-0.691457	5.937154666037015	-5.91321	1.3403946058934504e-7	1.8563491639368191e-6	6.8393890151773205	Down	5.731340333230825
GLYATL1	-0.70099	6.472765815043403	-5.90447	1.387528295601849e-7	1.912365052715344e-6	6.805438849843992	Down	5.718429201365896
HS3ST4	-1.13853	5.919706817176718	-5.90366	1.3919890834812605e-7	1.9172217922222118e-06	6.802285833492758	Down	5.717327643216622
CSF2RB	-1.70181	6.625650408670834	-5.90317	1.394701135673599e-7	1.9187833603774065e-6	6.8003738197128625	Down	5.716974056376459
RP4-657D16.3	-0.54594	6.0061347235500575	-5.90242	1.398826688568521e-7	1.9233026326778357e-6	6.79747241060728	Down	5.715952373920095
HADHAP1	-0.710466	6.282907613775248	-5.89601	1.434719413285908e-7	1.9691029068127345e-6	6.772585722641863	Down	5.705731586709477
PLXNA4	-2.92725	6.621650391802876	-5.89347	1.4491954195791576e-7	1.987778297634985e-6	6.7627246771036225	Down	5.70163205529231
PHF21B	-1.26865	5.802204851219203	-5.89005	1.4689175111529006e-7	2.012416990279474e-6	6.749447656428496	Down	5.696282024702743
LOC100507201	-0.929743	4.566416649779509	-5.88525	1.4970546957697185e-7	2.047287171818015e-6	6.730811509216616	Down	5.688821234822345
FGR	-1.03222	6.66874505313118	-5.88491	1.4990457990477166e-7	2.0487854740987283e-6	6.729506064450658	Down	5.688503513679187
KCNA4	-0.867262	6.218167812688381	-5.88273	1.5120044202370993e-7	2.064030377721038e-6	6.721052101687486	Down	5.685283915194276
NKX2-5	-1.22829	5.088007666503224	-5.88155	1.519093813294924e-7	2.072471517851793e-6	6.716457783110742	Down	5.683511429281813
CLIC2	-1.39641	5.958805766171177	-5.87357	1.5677374656097746e-7	2.1362874017680777e-6	6.68550175293444	Down	5.670340320648365
GAREML	-1.01658	6.753104083114852	-5.86554	1.618223534637168e-7	2.1998417260228026e-6	6.654374788612835	Down	5.657608564626715
PRKAR2B	-2.15443	7.753459861521762	-5.85047	1.7173552539986148e-7	2.318074976768986e-6	6.595989974200447	Down	5.634872521146177
COL22A1	-1.34552	7.17882278516855	-5.84981	1.7218750460245682e-7	2.3228053760610906e-6	6.593409131825562	Down	5.633987177476425
NR2F1	-2.18563	8.680306925247868	-5.84878	1.7288872078330144e-7	2.329517693051327e-6	6.589418527605827	Down	5.6327339866687
SMARCA2	-1.63129	9.56494165647232	-5.8414	1.7799008167535406e-7	2.394024149706305e-6	6.560865875083922	Down	5.620871472964158
ZNF426	-1.39728	5.925585904515585	-5.83526	1.823520189607089e-7	2.449646297750599e-6	6.53709475624547	Down	5.610896618502607
CRYL1	-1.08294	7.935771239756384	-5.83513	1.8244666687211073e-7	2.449646297750599e-6	6.5365852950593935	Down	5.610896618502607
YPEL4	-0.884201	5.428666076486303	-5.83263	1.8424926490492363e-7	2.472398200445599e-6	6.526932676458453	Down	5.606881581184738
RAX2	-0.802478	6.756033655614105	-5.82581	1.892709191367672e-7	2.5368068886526635e-6	6.500533411336796	Down	5.595712591660652
C1orf216	-1.03095	7.9220350355427644	-5.8232	1.91225495255699e-7	2.5570123354501093e-6	6.490447325929886	Down	5.592267176860253
TMEM176A	-1.30893	8.800501036528797	-5.82235	1.918667005550923e-7	2.564087758177545e-6	6.487161042033523	Down	5.591067114785038
BC035400	-0.534084	5.475888384986208	-5.82169	1.9236835496495429e-7	2.5692910643567947e-6	6.4845976432360315	Down	5.59018669352125
LAMA2	-1.9526	6.463929863052431	-5.82035	1.933874965110423e-7	2.581395876707198e-6	6.479410504850324	Down	5.5881453879839835
LOC100289230	-1.7125	6.181758386195055	-5.8129	1.9914186864725437e-7	2.652017935262242e-6	6.450626803401133	Down	5.57642354317862
LOC100287290	-1.6924	5.851358584952714	-5.81248	1.994788567250367e-7	2.6549603042537025e-6	6.448967098263966	Down	5.575941967905469
PNLIP	-1.08695	5.670130028103489	-5.81088	2.0073588292820345e-7	2.6685858602640135e-6	6.442800788179242	Down	5.573718819452487
BC069004	-0.512914	6.055737323000363	-5.79973	2.0974328510560717e-7	2.783478317825514e-6	6.399715520395344	Down	5.5554121573228805
OSTM1	-1.57066	7.396736132771566	-5.79506	2.136355607040017e-7	2.8236672405238902e-6	6.381668319375875	Down	5.549186484716294
TSPAN4	-1.35803	8.065050283784483	-5.78488	2.223575230246085e-7	2.9304825859907935e-6	6.342395699950036	Down	5.53306085501281
PILRA	-1.19518	6.924908994422748	-5.78033	2.2637307130661857e-7	2.975628146444628e-6	6.324830935509715	Down	5.526421341955935
ASIC5	-0.864218	4.630797904922323	-5.78026	2.2643334948905538e-7	2.975628146444628e-6	6.324569652578876	Down	5.526421341955935
RP11-16N11.2	-1.33348	6.063773102854303	-5.77599	2.3026843007467377e-7	3.0190896341996913e-6	6.308087731110949	Down	5.520123992952243
PCYT1B	-0.886239	6.054257203370475	-5.77527	2.3092556632994567e-7	3.025971381479282e-6	6.305291203358736	Down	5.519135183690361
PRAMEF11	-1.40142	6.927025539668452	-5.7711	2.347416055204936e-7	3.0706993668972973e-6	6.289207525647879	Down	5.51276270055097
MIR6751	-1.26657	7.4748905477096015	-5.7671	2.384563446552702e-7	3.1139513181323777e-6	6.273800513613723	Down	5.506688181245015
TDRD10	-0.826368	7.030287855434924	-5.76674	2.3879460052900876e-7	3.1159625547541264e-6	6.2724095525920935	Down	5.506407769985792
MIR6824	-0.776115	6.143434924174018	-5.76595	2.395405704021305e-7	3.120984459128897e-6	6.269348973395897	Down	5.505708393888774
av27s1	-0.979275	4.670674233462271	-5.7649	2.405319748340835e-7	3.132117844182696e-6	6.265296169070276	Down	5.504161906219629
COL6A6	-1.79003	6.091830186219197	-5.76318	2.421565481657501e-7	3.15147876307406e-6	6.258691057986119	Down	5.501485615116448
IGSF11-AS1	-0.99331	4.4995695999028955	-5.74636	2.5869534976202125e-7	3.3495704058886724e-6	6.1938685462526495	Down	5.47501088917678
MAP3K8	-1.50737	8.32484855439366	-5.74588	2.5918064097933914e-7	3.352059855831713e-6	6.192029811217254	Down	5.4746882350222705
PDGFRA	-1.9429	8.900758956143822	-5.73863	2.6666837635064716e-7	3.4411200127052775e-6	6.164088466866022	Down	5.463300180634878
C1orf162	-1.22731	7.132763259213036	-5.72902	2.769041465512419e-7	3.559151667947114e-6	6.127138622380012	Down	5.448653504789341
LOC100129550	-1.37487	7.908041928738294	-5.72793	2.7809731002639706e-7	3.5724808288006393e-6	6.122920827442312	Down	5.447030093108982
AF007147	-0.913123	6.876034290017329	-5.72571	2.80531219204778e-7	3.5997048593304068e-6	6.1143729757938585	Down	5.443733105682356
STK32B	-1.4217	7.365066913589448	-5.72325	2.832500248116117e-7	3.630519505694602e-6	6.104912011446543	Down	5.440031225566261
RPS4XP9	-1.11957	9.005985258182827	-5.72222	2.8438795065509697e-7	3.643063786695388e-6	6.100979216501137	Down	5.438533224594674
ATG2B	-1.1674	8.540228887963183	-5.71361	2.941569073588881e-7	3.7534946366224207e-6	6.067851374479754	Down	5.425564200361589
ZCCHC24	-1.43625	8.663329224296055	-5.71295	2.949213997703294e-7	3.7611520096685423e-6	6.065305574675599	Down	5.424679113898483
ALDH8A1	-1.25533	5.177408691627609	-5.71253	2.9540121420006364e-7	3.765172356369502e-6	6.0637111431417905	Down	5.424215138531832
KCNK6	-0.697788	6.965827491105749	-5.70916	2.993295646962019e-7	3.8084601850292696e-6	6.050753944183502	Down	5.41925058031281
GPR137B	-1.50965	8.103930622956401	-5.70905	2.9946325769778645e-7	3.8084601850292696e-6	6.050315977840746	Down	5.41925058031281
C15orf45	-1.0054	5.8868396019949385	-5.70833	3.003085227744998e-7	3.814968735456847e-6	6.047551492405993	Down	5.4185090168373335
CDK5RAP3	-0.878179	9.251022941228884	-5.70559	3.035496321907141e-7	3.854002239118395e-6	6.037023059554605	Down	5.414088037361811
RARRES1	-3.09305	8.419023638434732	-5.70461	3.0471320306677013e-7	3.864486348650018e-6	6.03327077209035	Down	5.412908222514459
PXMP2	-1.39339	8.559164264323787	-5.70372	3.0577779787127437e-7	3.875839466757278e-6	6.029850220746735	Down	5.411634219274857
NDN	-2.15429	8.451977421555386	-5.69951	3.1086309400348434e-7	3.9381155745878845e-6	6.013674075792266	Down	5.40471154247184
SERPINB9	-1.53207	8.540470581990558	-5.69423	3.173527653294803e-7	4.011444153576342e-6	5.993411572029484	Down	5.396699249569539
TRAF5	-1.42619	8.236973254208717	-5.69218	3.1992023360064066e-07	4.039434340258862e-6	5.985509658252874	Down	5.393679446796335
PRKXP1	-1.35949	6.218301605317473	-5.68793	3.252777789433254e-7	4.100292178757213e-6	5.969223390189581	Down	5.387185195206885
LIPA	-1.36148	9.564295820222258	-5.67755	3.387688286866524e-7	4.2609631839042995e-6	5.929374275397328	Down	5.370492218227682
KLK3	-1.10997	8.645072634480186	-5.67324	3.445275819283598e-7	4.326260453863306e-6	5.912846511563722	Down	5.3638873382786505
CUEDC2	-1.23902	9.281362420637096	-5.67278	3.451436194922335e-7	4.330255890214059e-6	5.911094887745681	Down	5.363486438883519
CLIP4	-1.75687	9.193591958080782	-5.67126	3.47206693573136e-7	4.350351556549715e-6	5.90525153435891	Down	5.361475645826886
ZNF749	-1.15493	4.809602038759011	-5.66588	3.545908206649704e-7	4.430739151280097e-6	5.884618531928475	Down	5.353523817220541
MCHR2-AS1	-0.792161	5.862258101070993	-5.66367	3.576640030322701e-7	4.464263352632465e-6	5.876157944388708	Down	5.350250193725156
CLECL1	-1.16848	5.534805797772573	-5.65703	3.670648758013342e-7	4.571626180434799e-6	5.850722150007782	Down	5.339929288865505
KAT2A	-0.796489	7.983132004731871	-5.64609	3.830901450205784e-7	4.753888420091418e-6	5.808831633866975	Down	5.3229510159413005
MRGPRF	-1.71296	6.70755698645291	-5.64549	3.840016427557303e-7	4.7592489624097256e-6	5.806502030325118	Down	5.322461576106334
HERC3	-0.599997	5.484162236358699	-5.64518	3.844606768389007e-7	4.7623583245247474e-6	5.805330929645604	Down	5.322177930957758
NDNF	-1.53284	7.542893366113424	-5.64465	3.852591068822799e-7	4.769666183095066e-6	5.803297287092103	Down	5.321512015071599
CTD-2537I9.5	-0.969904	5.527926160935337	-5.64165	3.897991691967735e-7	4.820656860569178e-6	5.791813212887974	Down	5.31689378095529
MUL1	-1.20003	8.667724329995718	-5.63989	3.924814268425318e-7	4.845469670354822e-6	5.785091279564145	Down	5.314664120500222
MAPRE2	-0.84657	7.8578633668683135	-5.62993	4.08043266767673e-7	5.02461686293397e-6	5.746978269139084	Down	5.298897048466156
SMAD9	-1.74189	6.77397824257995	-5.62751	4.119228999648837e-7	5.064150471948723e-6	5.737703422597169	Down	5.295493398534513
FMO5	-0.990482	6.646009628981626	-5.62613	4.141431163808363e-7	5.085979795854618e-6	5.7324349696801145	Down	5.293625369399453
CDC16	-1.33883	9.766322526376657	-5.62175	4.212758426051561e-7	5.16802681124041e-6	5.715698945630391	Down	5.286675241927918
HYMAI	-1.20945	6.326307430273943	-5.61669	4.296781717399738e-7	5.2654562888263845e-6	5.696344526035607	Down	5.278563988175918
CERK	-1.05473	9.20216894147007	-5.61527	4.320563810544501e-7	5.286105851414312e-6	5.690935268191857	Down	5.276864144604826
METTL7A	-1.74207	10.092036022242286	-5.61277	4.362924163909133e-7	5.33507974057066e-6	5.681373872356734	Down	5.272859085024701
SLITRK5	-2.17684	5.817760770271793	-5.61238	4.36955117234504e-7	5.340329127782168e-6	5.679886474451888	Down	5.272431976309486
LOC100505776	-1.97569	3.8106288201293905	-5.60995	4.411242985306594e-7	5.388405139392929e-6	5.670580502540925	Down	5.26853975831134
ZNF252P-AS1	-0.819666	5.481747202859032	-5.60882	4.430651434895602e-7	5.403458111885739e-6	5.666278399127905	Down	5.267328210874651
TCEAL3	-1.25103	9.542168581677664	-5.60807	4.443655441198106e-7	5.416430092656977e-6	5.66340646781643	Down	5.266286857718128
ITGAM	-1.75531	7.387577310553517	-5.60485	4.4997873282762516e-7	5.476097568278318e-6	5.651105650786879	Down	5.261528822592942
CLDN11	-2.42866	7.880204665183726	-5.60259	4.539557809214981e-7	5.518626095485098e-6	5.642483026965624	Down	5.258169029773928
LIMA1	-0.969049	8.6452243126337	-5.59932	4.597753494723282e-7	5.580477570598088e-6	5.630001138147672	Down	5.253328633069514
MDFIC	-2.4629	8.043079043085392	-5.59632	4.651838688551397e-7	5.640138704576969e-6	5.618542033785535	Down	5.248710215539409
ULK2	-1.23348	7.805316515411373	-5.59563	4.664386588396259e-7	5.652357031563454e-6	5.615902579902712	Down	5.247770413712955
SLC16A4	-2.5627	5.200864757894573	-5.58433	4.874166912053239e-7	5.884752758884752e-6	5.572799162928692	Down	5.230271778820147
LDB3	-1.23852	6.798181178282297	-5.57494	5.055664599709384e-7	6.081416949355993e-6	5.536981552479635	Down	5.215995219807702
CNNM1	-1.20183	6.5536862412751065	-5.57204	5.113028405514644e-7	6.1342934918599655e-6	5.52592875194899	Down	5.212235449278534
LOC100507557	-1.64066	5.744346899330068	-5.57054	5.14288601446959e-7	6.166880981396737e-6	5.520224901595266	Down	5.209934433221405
STAR	-2.03491	6.834157463755914	-5.56993	5.15521512659505e-7	6.175191983317704e-6	5.517879285367925	Down	5.209349535882158
RP11-116O18.1	-2.14396	3.669599279892173	-5.56811	5.191687551144e-7	6.212375495953117e-6	5.510973177026508	Down	5.206742301995008
CLK1	-0.882557	8.990897706132401	-5.56618	5.230907881746901e-7	6.252766009743331e-6	5.503600803175229	Down	5.2039278231310515
MIR34A	-1.47338	6.8015074839277725	-5.55805	5.398861810146108e-7	6.4400708735314286e-6	5.472644256586823	Down	5.191109353165927
TLE4	-2.29236	8.202260661169358	-5.55787	5.402668251194316e-7	6.441253096356162e-6	5.471953909575087	Down	5.191029635762373
LOC441259	-1.00958	6.263531811706226	-5.55643	5.432953851179981e-7	6.470616926660426e-6	5.466478534771105	Down	5.189054310510363
PPP5D1	-1.03	5.470647868942359	-5.55029	5.564138147122355e-7	6.613086580156486e-6	5.443109545096964	Down	5.179595791368594
TMEM200B	-1.06543	6.77614526996286	-5.54641	5.648830540199904e-7	6.706777059119544e-6	5.428314120122079	Down	5.173486129860838
ZNF471	-1.26627	6.269450681590855	-5.53965	5.799053873674227e-7	6.867316437670426e-6	5.402609497646682	Down	5.163212940378061
BDNF-AS	-1.01689	4.481733777016268	-5.5362	5.877322558684241e-7	6.9564026290810536e-6	5.389480240293339	Down	5.157615289445674
RHBDL3	-1.49903	7.021464779102797	-5.53152	5.985037137018615e-7	7.0802308509746074e-06	5.371695287218567	Down	5.149952581904871
PLEKHM1	-1.10559	7.984015692169272	-5.52396	6.163342783679294e-7	7.2746802435242994e-06	5.342948410229028	Down	5.138186091211453
MAOB	-1.83273	9.05175536990279	-5.51706	6.330442913886131e-7	7.438839415860338e-6	5.316754992020953	Down	5.128494816417104
SMOC2	-2.19329	7.591657117930832	-5.51674	6.338242585938395e-7	7.444181320517687e-6	5.315549362771809	Down	5.128183057150452
PROS1	-2.29782	8.94871831129755	-5.51511	6.37845136809869e-7	7.478495875478018e-6	5.309357616824546	Down	5.126185741529503
LOC145474	-0.920194	5.964029505697615	-5.51195	6.457059687399103e-7	7.5565763983633805e-6	5.2973649427180325	Down	5.121674922497004
MGAM	-1.29207	5.367964795173926	-5.50919	6.526731600332767e-7	7.626409207559416e-6	5.286857341484466	Down	5.117679895650719
GYPC	-0.980378	7.864265027415095	-5.50518	6.628832871815897e-7	7.729921879422828e-6	5.271660273993304	Down	5.111824895151148
YIPF2	-1.41013	8.568846370183618	-5.50222	6.705443004613841e-7	7.81129483210591e-6	5.260410682719532	Down	5.1072769697298375
KLF8	-1.35456	5.868769522509903	-5.49571	6.876630826608391e-7	7.98631658284129e-6	5.235731794657252	Down	5.097653478081589
DTX4	-1.68187	8.839247744749876	-5.49318	6.944521319244689e-7	8.04474446901262e-6	5.226114664958639	Down	5.094487746152926
GBGT1	-1.05341	6.3938442481106375	-5.49251	6.962365170125565e-7	8.061333640045688e-6	5.223602607257818	Down	5.093593104026149
LOC93463	-1.3275	4.612416232981107	-5.4893	7.049672674567026e-7	8.157521782900885e-6	5.211403765138857	Down	5.08844175784888
LOC100506895	-0.843804	5.065848500859135	-5.48919	7.052571391484746e-7	8.157521782900885e-6	5.2110013507877175	Down	5.08844175784888
KATNAL1	-1.2494	7.158528832478833	-5.48461	7.178617531763028e-7	8.29492881359628e-6	5.193661476212218	Down	5.081187336703512
SEPSECS	-1.22271	7.688461191998683	-5.48297	7.224577797852924e-7	8.32708638255618e-6	5.187414662678569	Down	5.07950693008496
ZGPAT	-0.842318	7.975606609799215	-5.48296	7.22464551307925e-7	8.32708638255618e-6	5.1874054884025	Down	5.07950693008496
PBXIP1	-0.953507	9.267947615935432	-5.47986	7.312031677558149e-7	8.415089172578113e-6	5.175637389513095	Down	5.074941277554656
PLSCR4	-1.82454	9.57051417402915	-5.47682	7.398578820350439e-7	8.506134916120486e-6	5.16412042917056	Down	5.070267733206528
CAMKMT	-1.05882	8.121895372328712	-5.47475	7.458134738518734e-7	8.570299582248624e-6	5.156273409824412	Down	5.0670039966715015
SRGAP2B	-1.22378	7.105028485433043	-5.47039	7.58487377654237e-7	8.707191527020214e-6	5.13978142772356	Down	5.060121902512675
ANO5	-1.57873	6.524641773347663	-5.46239	7.823188805125956e-7	8.962781005131535e-6	5.109505380226072	Down	5.047557214915231
RP11-271C24.3	-1.04218	7.444580044825376	-5.46106	7.863633368545144e-7	9.004607999947164e-6	5.104459141405703	Down	5.045535188692913
FBXO25	-0.841044	7.993428420579248	-5.45638	8.007028215121594e-7	9.159639926688349e-6	5.086775185879545	Down	5.038121598485639
LOC102724250	-0.989719	8.62037427609853	-5.45355	8.095146306226452e-7	9.246572757870945e-6	5.0760649698563585	Down	5.034019208683069
BC042590	-0.743773	5.143407864642895	-5.45262	8.12446966873253e-7	9.27081005241554e-6	5.072526796504694	Down	5.032882316996381
LOC100129917	-0.625688	4.641475106599227	-5.44948	8.223505118917435e-7	9.369799482854185e-6	5.060671049983738	Down	5.028269703073989
LOC100129973	-0.676581	4.674562127697894	-5.4483	8.261022887961347e-7	9.40318122655063e-6	5.05621706210314	Down	5.026725193697654
SACS-AS1	-0.909174	5.561160428592029	-5.44724	8.2951326940879e-7	9.43262131749687e-6	5.0521852208010705	Down	5.025367600420036
LOC101928590	-1.14021	5.75409544672862	-5.44681	8.308915046743436e-7	9.443599967930605e-6	5.050560834219211	Down	5.024862417971955
TRMT44	-1.08344	6.3038981567728465	-5.44661	8.315082637776456e-7	9.44591736195072e-6	5.049834797281654	Down	5.024755858188261
VSIG4	-1.32848	8.287596210871204	-5.44389	8.403070782138386e-7	9.531673595664063e-6	5.03953538826759	Down	5.0208308381288855
C4orf32	-1.50412	6.407940364028921	-5.44206	8.462572192556127e-7	9.584910356113448e-6	5.032631575734288	Down	5.018411944551941
PHLDB2	-2.02195	8.297237353001714	-5.43746	8.614326857154927e-7	9.74232249949815e-6	5.015241811237771	Down	5.0113374981029635
ALAD	-1.03156	7.723796461157255	-5.43348	8.747746385291199e-7	9.87368966695004e-6	5.000204942733919	Down	5.005520526908786
CFH	-2.41552	8.724348211609014	-5.42951	8.882910044837148e-7	1.001636761536861e-5	4.985204153561745	Down	4.999289744597278
RASSF8-AS1	-2.05103	6.808903221681736	-5.42546	9.022624426745022e-7	1.0163890903963531e-5	4.969936942527794	Down	4.992940005178232
LOC101928230	-0.613082	6.774417464686207	-5.42332	9.097482063343364e-7	1.0238135372711897e-5	4.961854144811158	Down	4.989779132332844
PLCL2	-0.768288	8.5944384460629	-5.42279	9.116204921878576e-7	1.0254161868616518e-5	4.95984295712547	Down	4.989099831220557
AC079305.10	-0.916182	5.6082513168379595	-5.4187	9.261281651189456e-7	1.039690200674993e-5	4.944397920890249	Down	4.983096049336411
ZEB2	-1.60409	7.2280132388430225	-5.41675	9.33115823171837e-7	1.0459949494536236e-5	4.937045122932358	Down	4.980470412437882
LINC00705	-1.51615	7.553084299590695	-5.41615	9.352463089325896e-7	1.0478697503461664e-5	4.9348142869005835	Down	4.979692696571176
GTF2H2B	-1.06198	5.781504792094439	-5.41542	9.379059831152226e-7	1.0494253124321154e-5	4.932036476013358	Down	4.9790484647069455
ZNF563	-1.57652	5.979618851504923	-5.41536	9.381234197454604e-7	1.0494253124321154e-5	4.9318097306603965	Down	4.9790484647069455
SH3PXD2A-AS1	-1.27689	5.446601224459325	-5.41024	9.568349064456887e-7	1.0668336171818185e-5	4.912491962916545	Down	4.971903307636707
RP11-37C7.3	-1.20712	5.350806925736564	-5.40649	9.707535619179875e-7	1.0802466314747876e-5	4.89836640461363	Down	4.966477079271944
RGS2	-1.71557	7.917104268130327	-5.39692	1.0072145240002e-6	1.116475828226772e-5	4.862304853778888	Down	4.952150674994126
BDH2	-1.16995	9.347592478778925	-5.39152	1.0283903648260314e-6	1.1370219946957889e-5	4.841957086526606	Down	4.944231134184189
HMX2	-0.958575	4.770051243957783	-5.3903	1.033232823611049e-6	1.140894487036544e-5	4.837363023341976	Down	4.94275451843602
TTLL10	-1.2481	7.843762939955289	-5.38871	1.0395688657344923e-6	1.1472922111523956e-5	4.831384484358892	Down	4.9403259547853455
MIEN1	-1.07356	9.183750053379637	-5.38621	1.0496130519418637e-6	1.1567484111453708e-5	4.8219814861708885	Down	4.936761088353911
ZNF830	-1.33089	8.456076232533587	-5.38148	1.068913314024308e-6	1.1751882610073113e-5	4.8041638504750965	Down	4.9298925553774415
TRIM6	-1.63647	7.066760230439552	-5.38116	1.0702024609790026e-6	1.1760404469134774e-5	4.8029852519747225	Down	4.9295777415513236
POLK	-1.49244	6.783228552070197	-5.37953	1.0769412594325934e-6	1.182877535984556e-5	4.796847402712486	Down	4.9270602158109575
ALOXE3	-0.585273	7.030933712678595	-5.37865	1.080620219547803e-6	1.1857798562606322e-5	4.793512752778997	Down	4.925995931617265
LDOC1L	-0.997973	9.59927835057846	-5.37703	1.0873740990027365e-6	1.1926189842321958e-5	4.78742048466085	Down	4.923498281790828
SAT2	-1.32431	8.572610228897137	-5.37664	1.0889773531393685e-6	1.1934460939662146e-5	4.785979857938069	Down	4.923197192594995
CCDC68	-1.47631	7.103537405791146	-5.3766	1.089171486604072e-6	1.1934460939662146e-5	4.785805560918749	Down	4.923197192594995
NRXN3	-2.03873	7.618053905586845	-5.37521	1.0950075602300798e-6	1.1992665376019146e-5	4.780580305590532	Down	4.921084284002583
LOC101927943	-1.51556	5.475373029948007	-5.36937	1.1198796733710624e-6	1.2235781779874182e-5	4.758620049583906	Down	4.912368277081408
RAC2	-1.49416	8.452954473117282	-5.36856	1.123379120298526e-6	1.2268157944300705e-5	4.75556960016156	Down	4.911220641403549
AX746755	-0.911937	7.775548966328825	-5.36524	1.1378031369274052e-6	1.2401999985594142e-5	4.743096027034887	Down	4.906508273493534
RHOBTB1	-1.23387	7.791969737732804	-5.36468	1.140232383476651e-6	1.2421627847835555e-5	4.741010878179616	Down	4.905821486365025
TPBG	-1.88402	9.068749230975758	-5.364	1.1432513175933386e-6	1.2443599855003805e-5	4.738425768195445	Down	4.90505396281228
LOC102725188	-1.29623	8.21362717942763	-5.36143	1.1545935999071643e-6	1.254318469718709e-5	4.728774172450676	Down	4.901592182738405
PRKD1	-1.1433	7.420614327872012	-5.35707	1.1741044428288632e-6	1.272493394006706e-5	4.71239192268139	Down	4.895344463571857
ZXDB	-1.26189	8.014568915929063	-5.35422	1.187007665779564e-6	1.2818092013359808e-5	4.701707022498533	Down	4.8921766152023345
HGC6.3	-1.27982	5.6583532384275586	-5.35418	1.1871819999261082e-6	1.2818092013359808e-5	4.701563458613152	Down	4.8921766152023345
BC034456	-1.1193	4.877393526926842	-5.35268	1.1940722029758231e-6	1.2886404684850876e-5	4.6959062499956365	Down	4.889868234184927
CIDECP	-0.896634	7.259700404656795	-5.35181	1.198046104676961e-6	1.2923195110280146e-5	4.692658337536105	Down	4.888630098785728
OAS3	-1.29099	8.22013198937995	-5.34574	1.2263096116185414e-6	1.3194782400903882e-5	4.669865237759098	Down	4.879597767464844
CNKSR2	-1.66978	6.441031138650659	-5.34042	1.2516041784983596e-6	1.3450188820978848e-5	4.649908721250896	Down	4.871271618759449
CASP12	-0.875002	4.388130871189058	-5.33689	1.268678485951442e-6	1.361831223755198e-5	4.636665022749189	Down	4.865876712638854
LRRC75B	-1.07174	7.120921292830481	-5.33445	1.280609509738699e-6	1.372964619180492e-5	4.627516364788252	Down	4.862340654236413
MEIS2	-2.08564	8.86642971247565	-5.33374	1.28414351387071e-6	1.3761086395244953e-5	4.624822907472434	Down	4.861347278539797
RAB31	-1.48983	9.08164946871569	-5.3322	1.2917365467533075e-6	1.382949951013988e-5	4.619060895524467	Down	4.859193536732163
RAPGEF4	-1.32925	5.592932146326017	-5.33095	1.297963773665579e-6	1.3876688400791956e-5	4.6143606234600965	Down	4.857714163626066
PPWD1	-1.18682	7.517046642813596	-5.3291	1.3072080546577685e-6	1.396247109361115e-5	4.607424631490866	Down	4.855037712991691
BEX1	-2.0285	8.301048258302261	-5.3271	1.3172601271015277e-6	1.4056713828337618e-5	4.599938150111911	Down	4.852116196601235
LOC644135	-1.06216	4.161394303316737	-5.32563	1.3246983059219984e-6	1.4122913579305406e-5	4.59443520356256	Down	4.850075698405748
RP11-457K10.1	-0.816575	4.182195247605106	-5.31969	1.3552001266682768e-6	1.4407817703551816e-5	4.5721886382697	Down	4.841401795110953
ZNF397	-1.09598	7.799456710580368	-5.31882	1.359727969346667e-6	1.4449241156842729e-5	4.568929109779773	Down	4.840154960523323
FRG1B	-1.47186	7.016300736040968	-5.3145	1.3824577951696838e-6	1.465674323247785e-5	4.552728969129812	Down	4.833962520369746
CHPF2	-1.22254	8.129468918859393	-5.31197	1.3958868554012648e-6	1.4792262790516692e-5	4.5432827734354495	Down	4.829965386363654
ZNF408	-1.03755	8.482705684575091	-5.31023	1.405231298137709e-6	1.4884392069487336e-5	4.536763368674232	Down	4.827268898757177
PTPN21	-1.4481	8.508822054312994	-5.30717	1.4218398340385306e-6	1.5025530514072769e-5	4.525282545852469	Down	4.823170185197641
LINC00427	-1.20019	6.4013720343336376	-5.30666	1.4246025971873254e-6	1.504777600233094e-5	4.523385810918051	Down	4.822527682215497
GIMAP2	-1.91193	6.85135417565085	-5.30501	1.433653658436204e-6	1.5129410540296086e-5	4.517197671066861	Down	4.820177992273156
FOXE3	-0.887945	6.0734332986477355	-5.30178	1.4514933108336978e-6	1.5296506429555122e-5	4.505114716128239	Down	4.815407746412092
CXorf65	-0.69201	5.43875318959051	-5.29907	1.4665836334688642e-6	1.5427111241440985e-5	4.495009601017059	Down	4.811715388865886
LINC00671	-1.41919	7.054970909934821	-5.29847	1.469965204927854e-6	1.5455576251628846e-5	4.49275946083032	Down	4.810914797896885
FGF14-AS2	-1.84104	5.902718061185612	-5.29602	1.4838356748282836e-6	1.558708742166956e-5	4.483583866814674	Down	4.807235028805374
ARMCX1	-1.66349	9.256979711213082	-5.29406	1.494996535988437e-6	1.5689920067375896e-5	4.476262964509705	Down	4.804379268929698
KIAA0485	-1.13135	7.796769486411808	-5.29256	1.5036133345944191e-6	1.5765888855263846e-5	4.470648218201737	Down	4.802281539406761
KDELC2	-1.0476	7.75913760980036	-5.29156	1.509382230273643e-6	1.581912782704108e-5	4.466907181782928	Down	4.800817464602247
NLGN1	-1.8298	4.944535208966046	-5.28787	1.5308459452796758e-6	1.60147345139706e-5	4.453113114431786	Down	4.795480256505203
HSPA2	-1.80413	8.670026660122513	-5.28583	1.5428176893929998e-6	1.6125228833084716e-5	4.445503257445995	Down	4.792494113576986
VGLL3	-3.1043	7.149504744545231	-5.28393	1.5540591657616648e-6	1.622789577976318e-5	4.438411310906877	Down	4.789737790123436
CTD-2528L19.6	-1.38496	6.837367359616136	-5.28292	1.5601211460830238e-6	1.628376446224156e-5	4.4346082900381	Down	4.788245188133008
ARRDC4	-2.25736	8.329253940724564	-5.27322	1.6190531941968345e-6	1.683741728637699e-5	4.3983907025709685	Down	4.773724524730475
AC092192.1	-0.63143	4.482227855447157	-5.27309	1.619847194318523e-6	1.6838020880878458e-5	4.397911815893781	Down	4.773708956246405
ETS2	-1.14301	7.86709565791829	-5.2727	1.622258042014419e-6	1.684777201236854e-5	4.396459198255891	Down	4.773457523084053
GATA6	-2.17037	8.89531073391487	-5.27141	1.6302974518380271e-6	1.691590721115747e-5	4.391630778819608	Down	4.771704705754554
TMEM219	-1.09908	8.766603755130182	-5.26999	1.639175103911729e-6	1.6992608610057292e-5	4.386326579622737	Down	4.769739945557661
AX747191	-0.789749	4.344368760860602	-5.265	1.6706862090305849e-6	1.7280121960402688e-5	4.367729259576785	Down	4.762453196663666
INSM2	-0.851314	5.4332341053532325	-5.26124	1.6948534438850517e-6	1.7479673365935168e-5	4.35370297322429	Down	4.757466687073317
OR7C1	-1.17869	6.251791857377705	-5.26117	1.6953273831465596e-6	1.7479673365935168e-5	4.353429915890714	Down	4.757466687073317
LXN	-1.04772	9.769873022799064	-5.26092	1.696936011442538e-6	1.7488377930537762e-5	4.352503684627636	Down	4.757250470023055
BCL2	-1.65193	8.226077882230587	-5.25773	1.7177298516716296e-6	1.76787859992781e-5	4.340609434409601	Down	4.752547561263935
GPHB5	-0.606753	6.10194184544032	-5.25672	1.724360339903078e-6	1.7731074254670795e-5	4.336847084634122	Down	4.751264951441247
RAD17	-0.880679	8.40918074595525	-5.25406	1.7419800857897255e-6	1.7896166314675857e-5	4.326919149818598	Down	4.747239992858098
SESN1	-0.848232	7.973968111273361	-5.25167	1.7579606608391949e-6	1.801988439038527e-5	4.318001516818598	Down	4.744247999637688
AP5S1	-0.789242	7.287524086652748	-5.25153	1.7588643787029295e-6	1.8021073945519174e-5	4.317499647051666	Down	4.744219331297299
TET2	-0.825428	8.391528649096168	-5.25114	1.7614916923919056e-6	1.8039914248090605e-5	4.316042064706921	Down	4.743765531188178
DUSP26	-0.759585	6.030284393302645	-5.25093	1.7629168028538675e-6	1.8046431110735408e-5	4.31525235300044	Down	4.743608671994564
DMD	-2.05118	7.964572257951135	-5.24948	1.7726770316326898e-6	1.809775894989929e-5	4.309860958764314	Down	4.742375200597689
C5	-0.969559	6.722396748626346	-5.24812	1.7819177899024836e-6	1.8175879231020477e-5	4.304783876256983	Down	4.740504571613641
FBXW8	-0.853969	5.342474871231734	-5.24725	1.7878264704444229e-6	1.8221939349221787e-5	4.301551333479604	Down	4.7394054032223005
HLF	-1.3393	7.755511258531729	-5.24722	1.7880263053019326e-6	1.8221939349221787e-5	4.301442194477656	Down	4.7394054032223005
MIR646HG	-0.831053	6.381537572033471	-5.24387	1.8110601841659125e-6	1.84238532474575e-5	4.288943602328186	Down	4.734619534340029
AX747652	-0.676888	5.882415675891691	-5.24289	1.817844160640782e-6	1.847643560697488e-5	4.285292874589122	Down	4.733381807224617
MST4	-2.12669	9.352066294188464	-5.241	1.8309876945797023e-6	1.8585256195336737e-5	4.278258531954742	Down	4.730831447834107
ANGPTL1	-2.62829	6.298022696128947	-5.2401	1.8372553930033016e-6	1.8640605825508884e-5	4.274921908845088	Down	4.729539977046419
ABCD4	-1.28052	7.216275009398491	-5.23964	1.840471380336384e-6	1.8664957761842257e-5	4.273214299524441	Down	4.728972988530047
G0S2	-1.21943	8.771498150104678	-5.23935	1.8425508871962071e-6	1.8677767721826332e-5	4.272111725369013	Down	4.72867502982025
TRIM55	-1.30763	4.6683387694127285	-5.23908	1.844458950040441e-6	1.868637108367098e-5	4.271101149738285	Down	4.728475030957146
ATL1	-1.15504	7.625962412899431	-5.239	1.8450330992618884e-6	1.868637108367098e-5	4.270797265781591	Down	4.728475030957146
C16orf54	-1.85493	5.53787121840666	-5.22963	1.912063884080647e-6	1.9288408114586036e-5	4.235955903276353	Down	4.714703613495514
UPK3B	-2.88747	8.294628516289587	-5.21797	1.9989429374154077e-6	2.0058690993476803e-5	4.192577358927605	Down	4.697697411936689
GPATCH11	-1.45148	6.636271861305804	-5.21741	2.003251210772138e-6	2.0093110237288796e-5	4.190475744699683	Down	4.696952833070381
SGCG	-1.23205	7.432918408020011	-5.21704	2.006031602382815e-6	2.0103371454628304e-5	4.189121850120171	Down	4.696731102711037
APOL3	-1.32555	6.332171046287291	-5.21208	2.0442667629260827e-6	2.044177415602528e-5	4.17069201218716	Down	4.689481414176539
TMEM151A	-0.67324	6.472664018046292	-5.21101	2.052614357230965e-6	2.050732047121714e-5	4.166714360216813	Down	4.6880910817373
PRAP1	-1.34418	7.031890634083884	-5.20717	2.0828014953988075e-6	2.077050709895585e-5	4.152464295002173	Down	4.682552900306986
GSG1L	-0.510317	6.4325854605396815	-5.20709	2.083496384986393e-6	2.077050709895585e-5	4.152138711486601	Down	4.682552900306986
HNMT	-1.52429	8.401907054806978	-5.20541	2.0968711124635426e-6	2.0876550993060657e-5	4.145893248968592	Down	4.6803412493674506
HFM1	-0.997804	4.696722955107821	-5.20159	2.127564773786137e-6	2.112697676191538e-5	4.131710286219927	Down	4.675162645378143
SIGLEC16	-1.28794	5.952898619021471	-5.19446	2.1859978799230863e-6	2.1650842205523933e-5	4.105267801877436	Down	4.66452520517216
SMPDL3A	-1.57899	7.44867774514767	-5.19321	2.1963863059608268e-6	2.171612890841735e-5	4.100641088358967	Down	4.66321758900714
FBXO10	-0.932119	7.626142564855896	-5.19099	2.2150577057228333e-6	2.1881824373589248e-5	4.092380276407316	Down	4.659916471993424
C10orf91	-1.3052	5.540598277656659	-5.18274	2.2856227514283905e-6	2.2520569737265352e-5	4.061778579099616	Down	4.647420626670576
APH1B	-1.21062	7.608123087348091	-5.18222	2.290064957129104e-6	2.254492089249431e-5	4.059883970609502	Down	4.6469512842435705
CCND2	-2.02476	8.93186044972721	-5.17754	2.331197582708444e-6	2.292027051774237e-5	4.042513900342134	Down	4.639780260890099
C4A	-1.5452	9.879184190218195	-5.17354	2.36684027960187e-6	2.3220814218272376e-5	4.027709003797285	Down	4.634122556160617
ZNF564	-0.971351	8.426000239709627	-5.16785	2.418497715031113e-6	2.368473665841498e-5	4.0066442564472	Down	4.625531439664462
FBXO44	-0.644118	6.30451341723016	-5.16739	2.422745791298499e-6	2.369816201757946e-5	4.0049321156373425	Down	4.625285335701992
ADAM15	-0.655141	9.240732402438168	-5.16681	2.4281293025295e-6	2.37406710737489e-5	4.002766670859624	Down	4.624507009075321
MGC16275	-0.57466	6.098947960701134	-5.16277	2.4655557579553474e-6	2.4086016304978817e-5	3.98784	Down	4.618235023988027
C16orf13	-0.985479	8.861186896500234	-5.16175	2.4751840983125435e-6	2.4159444106353536e-5	3.984041964196183	Down	4.6169130627794095
TRPC1	-2.01728	7.965667823798367	-5.15518	2.537588562458095e-6	2.47474376472629e-5	3.95975245555507	Down	4.606469761306694
S1PR1	-0.69671	5.706145612633777	-5.15475	2.5417243499685422e-6	2.4777209800992873e-5	3.95816392851668	Down	4.605947601763796
LINC00663	-0.756923	6.3392053445758725	-5.151	2.5781501863940263e-6	2.510021196362082e-5	3.9442839626687745	Down	4.600322611019273
PACS2	-0.785069	9.85645074671364	-5.14765	2.611115130410363e-6	2.5388739085702803e-5	3.931891276494629	Down	4.595358867527991
CTD-2555O16.4	-0.862719	5.29306323015225	-5.14391	2.648371640409267e-6	2.5696393028381517e-5	3.9180727575626344	Down	4.590127833781863
FLJ43315	-0.841	6.015787334219566	-5.14362	2.651296526593446e-6	2.5713867414977295e-5	3.916996179101896	Down	4.58983259972158
LEPR	-1.7664	7.662111577215328	-5.14292	2.658309414472875e-6	2.57709580905614e-5	3.9144197527567792	Down	4.588869435321454
LOC220729	-1.13705	7.598414563527379	-5.13466	2.742750238317599e-6	2.6510934813041132e-5	3.883921897807429	Down	4.576574958159494
DCAF4L2	-0.822593	5.03511704102411	-5.13367	2.753077704265689e-6	2.65882924423363e-5	3.880256692312304	Down	4.575309553104063
RP11-121C2.2	-0.939	7.848878642338152	-5.13053	2.785951821135079e-6	2.686042634460576e-5	3.8686808583304617	Down	4.570887098233194
PGM5	-2.64758	5.90143765004578	-5.12929	2.7990688045135505e-6	2.696416639093285e-5	3.864100222928518	Down	4.569213001573262
FAM65C	-1.79039	6.670639508516952	-5.12914	2.800714607886742e-6	2.6968665620303355e-5	3.863527006080367	Down	4.56914054142533
DTWD1	-0.719803	7.519325882501835	-5.12901	2.8020459368860488e-6	2.697013419857632e-5	3.863063564661141	Down	4.569116892569868
ALX1	-0.54207	6.265958474846157	-5.12646	2.8292356162120293e-6	2.718609057678077e-5	3.8536467296012864	Down	4.5656532404817325
FLJ16734	-0.992813	5.211887635143924	-5.12578	2.836573719817559e-6	2.722563657718617e-5	3.8511208148353058	Down	4.565021956981657
GATM	-2.18895	8.021442999500609	-5.12513	2.8435667175474713e-6	2.7266539367463784e-5	3.848719784089981	Down	4.564369978632829
GRPR	-1.64369	8.304796819746896	-5.12339	2.862274720527075e-6	2.742294109335802e-5	3.842325433518632	Down	4.561885969235826
SPOCK3	-2.0947	6.066987309690846	-5.12277	2.8690052005655548e-6	2.74759187876682e-5	3.8400352208446362	Down	4.561047775965704
FLG2	-1.29152	4.98837710233517	-5.11844	2.916439609010072e-6	2.7895159621463813e-5	3.824045713095111	Down	4.554471149130021
SLC39A8	-1.87043	9.261483978602486	-5.11781	2.92334988852368e-6	2.794957045530015e-5	3.821738144287214	Down	4.5536248622078395
IGFBPL1	-1.11458	6.066140378267753	-5.11662	2.93654959584625e-6	2.8064042691464643e-5	3.817345497456365	Down	4.551849767657931
CLEC4A	-1.53032	6.801234801688589	-5.11312	2.9756976813477177e-6	2.8413587727940064e-5	3.804433192840075	Down	4.546473925303049
FFAR3	-1.03449	6.240554062998233	-5.11178	2.9907955224043624e-6	2.853478346834421e-5	3.7994989130363352	Down	4.544625418676967
RNASE2	-1.34349	6.318654298001498	-5.11103	2.999291117550848e-6	2.8603910578760255e-5	3.7967333547483806	Down	4.543574588315817
LINC00479	-0.573518	5.563130858448327	-5.10786	3.03539927072881e-6	2.892415656601601e-5	3.785066137327024	Down	4.538739296302426
LOC101928429	-0.701689	4.95321676131719	-5.09123	3.2321660138957645e-6	3.065867588388109e-5	3.723837205184703	Down	4.513446605800682
AIRE	-0.821234	5.696768067635187	-5.09001	3.2471378146550084e-6	3.0787926258388696e-5	3.719332549138996	Down	4.511619562310467
LOC286437	-0.678862	8.13124862310498	-5.08402	3.321336261060881e-6	3.142632436592717e-5	3.697311128782777	Down	4.502706411249172
AK021804	-2.2031	7.721725023065072	-5.08342	3.3289058440735818e-6	3.1484926335907184e-5	3.6950923492121186	Down	4.501897318463124
PCSK5	-1.68796	7.023412517738837	-5.08269	3.3380635324153703e-6	3.1558494032285646e-5	3.6924148232435625	Down	4.500883729450996
FAM221A	-1.32242	8.283307223988666	-5.07846	3.3917360257825693e-6	3.201680608079955e-5	3.676868703573038	Down	4.494621994423873
SLC46A3	-0.882322	8.846121026641482	-5.07843	3.39213855237808e-6	3.201680608079955e-5	3.676753047388618	Down	4.494621994423873
CAPN7	-1.32983	7.697649104588708	-5.06989	3.503047478308376e-6	3.291426006415496e-5	3.645399422326242	Down	4.482615903709272
LRCH3	-1.05639	8.431454359580199	-5.06824	3.5249959034542267e-6	3.307972980932291e-5	3.6393128394190017	Down	4.480438046362518
C8orf34	-1.30098	5.8120114415197675	-5.05411	3.7176421784540208e-6	3.471670832687737e-5	3.5874653041154927	Down	4.459461459280196
LIAS	-0.800283	6.452490745364933	-5.05224	3.7438650675983566e-6	3.4933070506355134e-5	3.580617118594245	Down	4.456763239573931
FAM127A	-1.01931	9.19459	-5.04934	3.784980689360666e-6	3.5287927136056516e-5	3.5699759347894338	Down	4.452373851977588
AK131021	-0.875148	5.997853365794411	-5.04615	3.830697569398011e-6	3.56270445895354e-5	3.558279210065039	Down	4.4482202026754125
LOC100130856	-0.940571	4.76160924701866	-5.0456	3.838603567418225e-6	3.5686067053621116e-5	3.5562706620301237	Down	4.447501312818468
TMEM127	-0.962472	8.796665987333558	-5.03678	3.967994672310427e-6	3.679925014503051e-5	3.5239754098449394	Down	4.434161030815433
AGPAT4	-1.09758	7.184349667880067	-5.03523	3.991238778758609e-6	3.6984832733583726e-5	3.5182859428181894	Down	4.431976341083903
LOC257396	-0.817818	6.024469383624492	-5.03469	3.999400515562276e-6	3.704545926945316e-5	3.51629607440094	Down	4.431265016701444
ALOX15	-1.2089	5.907033777244965	-5.02943	4.079196096423084e-6	3.767780681875806e-5	3.4970534318279105	Down	4.423914384919294
UBA5	-1.15551	8.11683382185708	-5.02712	4.114700942005341e-6	3.796672300459492e-5	3.48861256013664	Down	4.4205968862007055
AK026714	-0.734368	6.130136950096223	-5.02476	4.151397681569943e-6	3.8282880917629475e-5	3.479964778831868	Down	4.4169953875213475
ZFYVE20	-1.09764	8.800539096563648	-5.02442	4.1566605985758545e-6	3.831597011878202e-5	3.47873083681512	Down	4.416620174103116
SNAI2	-1.32981	7.521560564893457	-5.02236	4.189045253314994e-6	3.8564819336268495e-5	3.4711722668821023	Down	4.413808698826169
AHI1	-0.639983	8.365446481231526	-5.014	4.322602167201077e-6	3.963800199735208e-5	3.4406074622812133	Down	4.401888244787008
TMEM91	-0.782028	5.994192660266055	-5.00972	4.392506730815772e-6	4.021455041790078e-5	3.4249852986763054	Down	4.395616782167613
RSPO1	-2.30539	7.833746543660697	-5.00788	4.4230063360164095e-6	4.0461400224597933e-5	3.4182472993095727	Down	4.392959091923743
TMEM235	-1.48387	6.219268762965204	-5.00755	4.428412768568307e-6	4.0494666559582055e-5	3.417057771301571	Down	4.392602172742666
HCCAT5	-0.761419	5.879110311453443	-5.00287	4.506758607716706e-6	4.1128891179078785e-5	3.3999817237530037	Down	4.38585299876456
CLEC1B	-0.728587	5.394116588693288	-5.00023	4.5516758822518e-6	4.1522245817399896e-5	3.3903255047537337	Down	4.381719164800089
CDH17	-1.41027	5.8430569843223505	-4.99982	4.5585934189112824e-6	4.1568775939127634e-5	3.3888468889525294	Down	4.381232763819724
WASF3	-1.8372	7.995876664795301	-4.99795	4.590755897731053e-6	4.181206376759107e-5	3.3820016298495004	Down	4.378698395933037
COL4A6	-1.3179	7.0868688971838925	-4.98813	4.762794152370225e-6	4.320400366189752e-5	3.346184198768401	Down	4.364476005784573
CLDN17	-1.30122	7.522991305201014	-4.98471	4.8242946188507195e-6	4.367828911147037e-5	3.333694318437691	Down	4.359734381383898
CSDC2	-0.8186	6.883546917129489	-4.98084	4.894662306563515e-6	4.428033962509556e-5	3.3195981250822006	Down	4.353789056791976
TFPI2	-2.60223	8.314025459098627	-4.97408	5.019997941384301e-6	4.519973746593129e-5	3.2949870119169047	Down	4.344864087698097
B4GALT1	-1.06588	8.673888321252367	-4.96926	5.111306095214771e-6	4.591345589023116e-5	3.2774427377320796	Down	4.338060016805513
LOC102725017	-0.548822	7.309668119230115	-4.96823	5.131055719512072e-6	4.6072772294629786e-5	3.273689357997548	Down	4.336555654557916
ZNF818P	-0.72618	7.338259979167456	-4.96325	5.227607636589391e-6	4.673795823271929e-5	3.255546056706149	Down	4.330330263865735
ZNF573	-1.17428	7.616764873644157	-4.96211	5.249942471870002e-6	4.691931008356007e-5	3.2513969634054183	Down	4.328648382513578
TNFSF13B	-1.61562	8.716136279291291	-4.9604	5.283569878026654e-6	4.7201403842003835e-5	3.2451833640500913	Down	4.326045084591141
LOC101926912	-0.714557	4.757104019134925	-4.96025	5.286558956829925e-6	4.720967305749877e-5	3.244632970253192	Down	4.325969007190348
LINC01133	-1.16412	7.384318496974656	-4.96	5.291511567982396e-6	4.72354635832498e-5	3.2437217085461176	Down	4.325731817988323
FCGR3B	-1.61083	8.071397863577387	-4.95864	5.318435567084855e-6	4.745728835387457e-5	3.2387827189106764	Down	4.323697080416895
A2ML1	-0.677745	6.037062224150992	-4.95575	5.376227780790715e-6	4.793558667058097e-5	3.2282653907634424	Down	4.319341953048368
PEG3	-2.92506	8.393982441557174	-4.95185	5.4549538672756185e-6	4.854293641750248e-5	3.2141194930712063	Down	4.3138739562417054
RP11-38P22.2	-1.63461	6.757995820810489	-4.94904	5.512637132096133e-6	4.896103452842679e-5	3.203884115589589	Down	4.310149414284872
SOX14	-0.756179	4.798568318972341	-4.94607	5.574044562096254e-6	4.942967656441868e-5	3.193105354502726	Down	4.306012231269909
SNORA21	-0.878336	6.3410400282813475	-4.94547	5.5866001492893545e-6	4.9521822865397575e-5	3.190916166943375	Down	4.3052033776023775
BBS2	-1.20311	8.900409834622327	-4.94117	5.676897004199849e-6	5.0186138546788385e-5	3.1753159747422997	Down	4.299416218789689
ANKRD18B	-0.775077	5.7051244052171075	-4.93672	5.772089387432336e-6	5.091194589323213e-5	3.159137342760274	Down	4.2931803035805585
LPAR5	-0.736411	7.024168746764276	-4.93586	5.79066510611593e-6	5.105380615137817e-5	3.1560115058371396	Down	4.291971874949792
AK000798	-0.914858	5.599838829991499	-4.93101	5.896300283347004e-6	5.1885174685652345e-5	3.138424815339426	Down	4.284956716756166
TEP1	-1.38773	7.081985812295664	-4.92912	5.9379322413048835e-6	5.221135732083567e-5	3.131580422172905	Down	4.282235016437114
LEMD1-AS1	-1.13016	5.616294268568349	-4.92479	6.034628647628889e-6	5.2858449015735584e-05	3.115867335948958	Down	4.27688558418179
SPDYE1	-0.81821	6.772706992453076	-4.92056	6.130393217970621e-6	5.367671888019511e-5	3.1005527457650706	Down	4.2702140393326795
IGFBP4	-1.30703	8.086649437125642	-4.91945	6.155767045978242e-6	5.385766510322608e-5	3.096535210695346	Down	4.2687524785287625
FBXL2	-1.20782	8.086992924411401	-4.91739	6.203360064833356e-6	5.4211869718610525e-5	3.0890442454190543	Down	4.26590561403517
MICU3	-2.01543	6.332919476703042	-4.91531	6.251434501310885e-6	5.461113782187543e-5	3.081535832462378	Down	4.262718774854054
CCDC110	-0.827836	5.224832842593868	-4.91419	6.277645589757491e-6	5.481918070536704e-5	3.0774664760672	Down	4.261067459453161
ELAVL2	-1.64885	5.490643679177317	-4.90263	6.553604481939706e-6	5.694641737269219e-5	3.035629020009817	Down	4.2445335931689465
PRPF38B	-1.06108	8.198545101556428	-4.90247	6.5575075908456736e-6	5.6958700140834536e-5	3.035050044304829	Down	4.244439930328086
KCTD2	-0.780208	8.403621885163309	-4.9023	6.561851256115157e-6	5.6973871260256376e-5	3.03440612422384	Down	4.2443242701019175
CFHR3	-0.985209	4.88820462072432	-4.899	6.64269032889951e-6	5.759410923461332e-5	3.0224996923171217	Down	4.239621934245727
CYP3A7-CYP3AP1	-1.33986	5.628681830973422	-4.89898	6.64324726911773e-6	5.759410923461332e-5	3.0224181684029885	Down	4.239621934245727
TMEM254-AS1	-0.532409	6.186648312853126	-4.89869	6.650450542516984e-6	5.763471892509321e-5	3.0213643837171498	Down	4.239315820480638
PDZRN4	-1.3733	5.364960968145082	-4.89832	6.659719879894647e-6	5.7682554998221427e-5	3.0200100335522615	Down	4.238955511169112
H2BFXP	-1.10127	6.329730828394642	-4.89826	6.661012732431531e-6	5.7682554998221427e-5	3.0198212841992005	Down	4.238955511169112
DCTN1	-1.17651	8.892410206650032	-4.89696	6.693498401985654e-6	5.789812852137232e-5	3.015090584896922	Down	4.237335474026912
LOC101930114	-0.673924	6.572367248422836	-4.89637	6.707995295905194e-6	5.8001596513611085e-5	3.01299	Down	4.236560052169666
GCGR	-0.597599	6.159993689318928	-4.89053	6.85524935984225e-6	5.9163051717778513e-5	2.991873556539873	Down	4.22794943254517
SCIN	-1.71852	6.14853361880474	-4.88717	6.9413878198634935e-6	5.981620035052989e-5	2.979732976671571	Down	4.223181177717405
MYO15A	-0.822564	6.651240969612963	-4.88507	6.9959618607388945e-6	6.016020266769908e-5	2.972119164287366	Down	4.220690709362639
NPY5R	-0.976751	6.21220242473112	-4.88296	7.050821994807177e-6	6.048584792620675e-5	2.964525280378269	Down	4.218346226777604
OR7A10	-0.834796	5.392877828718198	-4.87567	7.2444109505592e-6	6.19838736491563e-5	2.9381941040834407	Down	4.2077212862463815
KIAA0430	-0.995678	8.640858036320925	-4.87524	7.256069273033177e-6	6.201404889717073e-5	2.9366310084384617	Down	4.207509912641206
SNRNP200	-0.799273	6.980879752966171	-4.87486	7.266176192995633e-6	6.20772386555441e-5	2.9352779562801112	Down	4.207067609780343
CTSO	-0.941332	8.273888889130898	-4.87456	7.2744249516028365e-6	6.210133151780645e-5	2.934175062464612	Down	4.206899087993524
GSTM3	-1.14145	8.947349043921983	-4.87272	7.324238828718266e-6	6.247996277488635e-5	2.927541297748772	Down	4.204259237880216
ALPL	-1.53943	6.77639646905995	-4.87135	7.361499291132502e-6	6.270429720097562e-5	2.922608820013962	Down	4.2027026954257165
CDR2	-1.15966	8.639214487242109	-4.87005	7.397008581769058e-6	6.293646684354567e-5	2.9179314222181736	Down	4.201097641362762
KRT6A	-2.9537	7.1606829426639544	-4.86793	7.4553984874535615e-6	6.338612485858418e-5	2.910288893878371	Down	4.198005798219766
CNNM3	-0.590895	7.278377658829675	-4.86396	7.565997013165747e-6	6.42210992855333e-5	2.8959761504851125	Down	4.19232226479949
LOC102725451	-1.25824	4.756892561251225	-4.86308	7.590912534879648e-6	6.434697587458742e-5	2.8927807787236217	Down	4.191471858889212
ZNF862	-0.679993	9.269292919081169	-4.8586	7.717882648428636e-6	6.520584826934962e-5	2.8766588754297677	Down	4.185713450936728
FRA10AC1	-0.795879	8.679758033025664	-4.85475	7.828987642960728e-6	6.607134204474309e-5	2.8627683321541246	Down	4.179986871688625
SOX2-OT	-1.4611	2.7817833647509507	-4.84916	7.992902581493554e-6	6.738010986071888e-5	2.8426325303507864	Down	4.1714682852536065
ADPRM	-1.21386	8.003742306675457	-4.84795	8.028791822235616e-6	6.765772674067355e-5	2.838279120395108	Down	4.169682598338859
ERC2	-1.20144	5.658600177836242	-4.8471	8.05405338954583e-6	6.782256116118584e-5	2.835226557241193	Down	4.168625814127848
ZC3H12D	-1.34311	5.6318805231441145	-4.84456	8.130173996860712e-6	6.838612164491774e-5	2.8260860504451175	Down	4.165032025539848
RP11-79P5.9	-1.01407	5.459459465001331	-4.84406	8.145142763636505e-6	6.84244620244167e-5	2.8242987216853175	Down	4.1647886084702055
SMYD2	-1.22537	8.968323660176921	-4.83694	8.362672980106232e-6	7.000716981772795e-5	2.798690458564768	Down	4.15485747923119
PLEKHA6	-0.864148	6.645859653760931	-4.83403	8.453171304756569e-6	7.06871733485108e-5	2.788233122983832	Down	4.150659384637873
KIAA1045	-0.580274	5.80418414132987	-4.83295	8.487111352795496e-6	7.091914559554716e-5	2.784340203712941	Down	4.149236505239399
PRDM13	-0.861952	4.687565575039413	-4.83071	8.557557302611111e-6	7.140348414530984e-5	2.776309696207673	Down	4.146280596232726
C7	-2.86661	8.207915785351155	-4.82887	8.616188797420646e-6	7.18141287782102e-5	2.7696764151023467	Down	4.143790103852867
PCDHB12	-1.22155	7.048823203646151	-4.81617	9.030102342610132e-6	7.471960632787602e-5	2.724098673359232	Down	4.126565424921452
MSANTD3	-0.566832	7.72064896742851	-4.8159	9.039371320520038e-6	7.47692611866153e-5	2.72310220371659	Down	4.126276910702276
LOC100506929	-0.631721	5.600509558200873	-4.81525	9.060872062128456e-6	7.492001876018683e-5	2.720794690877132	Down	4.125402122548207
ATP6AP1L	-0.633567	6.730633497576423	-4.81327	9.127498940359008e-6	7.538918709619991e-5	2.7136788778462035	Down	4.122690939557347
FW340027	-0.956708	4.304621848730402	-4.81273	9.14570579024603e-6	7.551230702816273e-5	2.711743438802599	Down	4.121982261101394
CFI	-1.43239	10.353170588700864	-4.81002	9.23777911314167e-6	7.621750751156446e-5	2.7020146453818805	Down	4.117945257763711
RAB38	-1.16757	8.550331922782965	-4.80903	9.271628153748565e-6	7.641411402363596e-5	2.6984624859919704	Down	4.1168264179104135
SCN10A	-1.53249	7.514746228180324	-4.80871	9.282498478574792e-6	7.644862587880226e-5	2.697324501927471	Down	4.1166303163813796
GPBAR1	-1.40418	8.426212385694937	-4.80691	9.34430443343529e-6	7.692995362812737e-5	2.6908795263493337	Down	4.1139045293464
FGF13-AS1	-0.634166	4.7515688490807015	-4.80648	9.35932251866407e-6	7.70258776634947e-5	2.689319939010331	Down	4.113363344458719
ZMAT1	-1.15141	7.625998994523679	-4.80533	9.398961441146976e-6	7.726871678476524e-5	2.6852155791121772	Down	4.1119963001002935
CCDC71	-0.634837	6.378580366056268	-4.8052	9.403701375174191e-6	7.727991514461578e-5	2.6847259524128715	Down	4.111933363459092
FBXO16	-1.21919	7.8321626858321	-4.79961	9.59958958303468e-6	7.869187032255481e-5	2.6647047796919425	Down	4.1040701323985624
TLCD2	-1.38538	7.477069431198381	-4.79856	9.636795628822053e-6	7.89685699111102e-5	2.660948439304126	Down	4.102545726813291
FLJ13224	-1.10579	5.437645905643085	-4.79556	9.743952010662607e-6	7.978950538724044e-5	2.6502106746471012	Down	4.098054227097087
TLR1	-1.05156	6.200523041504406	-4.79433	9.788299781593584e-6	8.012397520682634e-5	2.645801379323765	Down	4.096237512104847
SEMA6D	-1.73167	8.8160998229148	-4.79351	9.817996703636668e-6	8.033832138143896e-5	2.642859947015446	Down	4.095077246818866
RP11-999E24.3	-1.51729	5.9006518632884974	-4.79156	9.888632244503471e-6	8.085063746049617e-5	2.635899342730853	Down	4.092316551583374
RBM20	-0.631366	5.525008470308433	-4.78396	1.016969291679854e-5	8.27426757622453e-5	2.6086887143891255	Down	4.082270438843116
LOC100996668	-1.85871	7.413362951365515	-4.7828	1.021334007736158e-5	8.300923894492204e-5	2.6045308960348637	Down	4.080873567870936
RP11-247L20.4	-1.30049	6.675819089354342	-4.77773	1.040559169524448e-5	8.45117260899888e-5	2.5864268847222567	Down	4.073083028057882
PRKCG	-0.947683	7.093160536646889	-4.77706	1.0431239064598749e-5	8.468996400246798e-5	2.5840371373460984	Down	4.0721680517305705
PDCD4	-1.00932	4.0424407082767155	-4.77433	1.053679567815319e-5	8.532612418269739e-5	2.5742633826899626	Down	4.068917981125786
SLC16A1	-1.56249	8.787520059120302	-4.77426	1.0539430348367622e-5	8.532612418269739e-5	2.574020691087738	Down	4.068917981125786
CACHD1	-1.37607	7.633031199431289	-4.77258	1.0604797273587933e-5	8.579460990891736e-5	2.5680188635604067	Down	4.066539996071415
EID2	-0.873399	8.739459484961422	-4.77165	1.0641351606038705e-5	8.60599092946481e-5	2.564678706998065	Down	4.06519911599056
PDE1A	-1.635	6.869278359653394	-4.77129	1.0655447966586184e-5	8.611914924600853e-5	2.5633937267684415	Down	4.064900269136392
FLJ31306	-1.11562	7.861782494670678	-4.77001	1.070576588018231e-5	8.642809370948872e-5	2.5588207802961422	Down	4.063345065856572
IL12B	-1.00099	4.311326691635933	-4.76513	1.0899410598112682e-5	8.780549826557044e-5	2.5414211952947836	Down	4.056478288289419
MS4A14	-0.633906	5.729162544110307	-4.76474	1.0915366832454229e-5	8.7903089672552e-5	2.540001344675143	Down	4.055995859804974
TACC1	-1.70529	9.769711535260113	-4.76008	1.110398684330023e-5	8.926497364296063e-5	2.5233733088015713	Down	4.049318918912521
ZNF649	-0.62965	6.052156848217426	-4.75976	1.111683765119424e-5	8.933689098056655e-5	2.5222507687204727	Down	4.04896916551404
FCER2	-0.835523	7.066196324451984	-4.75743	1.121241135969912e-5	8.997851964172437e-5	2.51394288852532	Down	4.045861156277354
SCRG1	-0.741508	5.743066483009793	-4.75482	1.1320615958524618e-5	9.068780550248064e-5	2.504622430772023	Down	4.042451107196074
IGHD	-1.40799	6.634527080310429	-4.74484	1.1743442012191252e-5	9.374675847764258e-5	2.4690394172239385	Down	4.028043740129429
IZUMO2	-1.24788	6.06440840534801	-4.73705	1.208404832985619e-5	9.616380582218426e-5	2.441298820454578	Down	4.016988357166769
RP11-981G7.6	-0.729787	3.9123111361864114	-4.73154	1.2330888604625856e-5	9.78747884598207e-5	2.4216812712849807	Down	4.009329163588732
ZNF701	-0.867088	7.677398201884249	-4.7308	1.2364128876642169e-5	9.808561184767552e-5	2.419069680551213	Down	4.008394694490048
LPAR1	-1.62642	6.850651567338249	-4.7295	1.2423134839638064e-5	9.85195500852961e-5	2.4144510707474263	Down	4.006477580145149
TLR2	-0.991589	7.548564891287472	-4.72865	1.2461926449873652e-5	9.879293667590412e-5	2.4114266951938665	Down	4.005274104727511
LRRC42	-1.02587	8.179801081180647	-4.72512	1.26244043147969e-5	9.99424727744769e-5	2.398861032765592	Down	4.000249909455921
RBPMS	-1.38651	8.502394246411818	-4.72201	1.2769051272928864e-5	1.0101767775703302e-4	2.387810246442579	Down	3.995602619479366
KIF1C	-0.828146	8.119729536754264	-4.7215	1.2792950474912055e-5	1.0113680508483514e-4	2.385996493865913	Down	3.9950907698644604
FLJ36848	-1.00584	5.121953356483909	-4.72071	1.2830245548663997e-5	1.013615980344902e-4	2.3831728906632916	Down	3.9941265511229367
VIM	-1.54983	10.4696293957542	-4.71299	1.3197783700163471e-5	1.040496530930531e-4	2.3557793703853855	Down	3.9827593634102967
ASPHD1	-0.934621	8.221814211325935	-4.70761	1.3460357182146554e-5	1.0586439050200449e-4	2.3366742111953966	Down	3.9752500985248647
PLA2G3	-1.04874	7.927795518884145	-4.70648	1.3516355433536726e-5	1.0626828039996108e-4	2.3326481478940613	Down	3.973596346981688
CEACAM8	-0.981486	5.046451579013096	-4.70455	1.3611885421458233e-5	1.0690914059647884e-4	2.3258184025802757	Down	3.970985161574154
PJA2	-1.27328	8.277396819426516	-4.70314	1.368223891160213e-5	1.0731434489494176e-4	2.320819309124407	Down	3.9693422212557006
ECHDC2	-0.814748	9.467947386012094	-4.70302	1.3688506781596033e-5	1.0732671235645496e-4	2.3203751872220293	Down	3.969292173791669
AADAC	-1.7231	7.7064497599429025	-4.70243	1.3717795489262557e-5	1.0751950770772116e-4	2.318302582603546	Down	3.9685127327603915
DCAF10	-0.797268	8.821854864739654	-4.6992	1.3881067498110298e-5	1.086875233707274e-4	2.3068295101965584	Down	3.963820307268261
DPY19L2P2	-1.5847	6.613821836308438	-4.69812	1.393596713210044e-5	1.0904274692726604e-4	2.303002150562338	Down	3.9624032165981133
DKFZP434K028	-0.770101	6.656098989415317	-4.68945	1.4384466796546154e-5	1.120157303737847e-4	2.2722902391074813	Down	3.9507209850545633
DNAJC27	-0.722121	7.233711770332556	-4.68925	1.4394863005424242e-5	1.1203343218841592e-4	2.2715897946674692	Down	3.9506523590410394
ZNF23	-0.728961	7.878083003181809	-4.67847	1.497326848637226e-5	1.1604790301480724e-4	2.2333992747714335	Down	3.9353627028368963
GABRA4	-0.86312	6.771207596759698	-4.67723	1.5040816285241718e-5	1.164530747174434e-4	2.229036220463809	Down	3.933849040274938
ZNF175	-1.14509	7.155757373955182	-4.67408	1.5215104208248e-5	1.17563785606385e-4	2.217868847121891	Down	3.929726437898051
ZYG11B	-0.799645	9.234717543834131	-4.6739	1.5224944374969355e-5	1.1757509255397128e-4	2.2172421821370927	Down	3.929684670709349
OR10J1	-0.584109	6.423209556750077	-4.66953	1.5469648870973744e-5	1.1932909525253146e-4	2.2017877686790177	Down	3.9232536521634187
EXOC4	-1.12244	9.337609377123512	-4.66603	1.5667975923482446e-5	1.2051822457435088e-4	2.189441390917378	Down	3.9189472748018823
EIF1AY	-0.839596	4.048024957772927	-4.66106	1.5954677899178947e-5	1.2249230726688428e-4	2.171868089274585	Down	3.911891184903108
DKFZP586I1420	-0.934441	8.520066642285459	-4.65773	1.6149289737535268e-5	1.2373730740290333e-4	2.160119186167287	Down	3.9074993387183468
MTSS1	-1.46503	8.607339324675241	-4.65438	1.634790428746957e-5	1.2482625214885025e-4	2.1482743307957053	Down	3.9036940687848998
MRC1	-1.48715	7.901940012973311	-4.65303	1.6427990079199354e-5	1.2528532834066734e-4	2.143539055377718	Down	3.902099784502762
ZNF493	-1.18061	7.859078522536583	-4.65026	1.659491570232591e-5	1.2640993974989188e-4	2.13374322869054	Down	3.8982187756674898
RABEP1	-1.1222	7.90037702507875	-4.64914	1.6662422507918514e-5	1.268617519330009e-4	2.129809745485317	Down	3.896669295385494
CYCSP19	-0.972254	4.6755151739744765	-4.64357	1.7003816935728534e-5	1.2907442855757568e-4	2.110159368368703	Down	3.8891597889988567
GRM4	-0.570612	6.236034386429005	-4.6409	1.716995899531775e-5	1.3029236877408782e-4	2.1007392471713677	Down	3.885081020176581
CTD-3092A11.2	-1.17468	8.482270689350031	-4.63976	1.7241204620670085e-5	1.3074627793049746e-4	2.096727689249396	Down	3.8835706657284113
FAM102B	-0.970089	7.7638622102104415	-4.6339	1.7612093520652123e-5	1.3329377692987096e-4	2.0761096983038643	Down	3.8751901259657777
OGFRL1	-1.45686	8.478451119532032	-4.63062	1.7823596162349886e-5	1.3467174920687023e-4	2.064546468962278	Down	3.8707234989344665
SESN3	-1.09094	8.3352272421547	-4.62957	1.7891445718858898e-5	1.350235491154195e-4	2.060866189773802	Down	3.8695904806977786
NLRC4	-0.708493	6.123057859574658	-4.62731	1.803920936657581e-5	1.3589696117809945e-4	2.052899496904227	Down	3.866790254513557
VNN2	-0.99811	6.368752148270707	-4.62464	1.8215266001563377e-5	1.3700863351940562e-4	2.043492509567872	Down	3.8632520651669595
RP11-382B18.4	-0.880674	4.68597340909161	-4.62461	1.821671677809484e-5	1.3700863351940562e-4	2.0434153721824933	Down	3.8632520651669595
PRR9	-0.932366	7.245009564365546	-4.61662	1.8752964747587745e-5	1.4071796669729746e-4	2.0153177032851213	Down	3.851650448838568
HCG26	-0.696417	6.542553106841885	-4.6155	1.882987658272862e-5	1.4124876929057315e-4	2.0113540752713517	Down	3.8500153275272244
IRX5	-0.866325	5.860758458331495	-4.61503	1.8861691735380413e-5	1.4139470681971445e-4	2.0097192431128574	Down	3.8495668482620156
MAMDC2	-1.58545	5.826312066691885	-4.61344	1.897093060797685e-5	1.4202746118452305e-4	2.0041269723346646	Down	3.8476276761250148
CDC14A	-1.27788	7.438699144171361	-4.60994	1.92134316609134e-5	1.4360800489057095e-4	1.9918273243763212	Down	3.8428213512990825
CPQ	-0.917808	7.880219880882755	-4.6094	1.9250965653006776e-5	1.4379459457236108e-4	1.9899375461117996	Down	3.8422574393461755
LOC728392	-1.53067	8.41123430294877	-4.60161	1.980230383463178e-5	1.4767174362207967e-4	1.9625970898363925	Down	3.830702597193084
EIF3J-AS1	-0.860614	7.22623898334346	-4.60149	1.981112694616665e-5	1.476894015644662e-4	1.9621658009449312	Down	3.8306506692596076
POLR3GL	-0.794238	8.412512541218256	-4.59813	2.0053281010781453e-5	1.4915442660782472e-4	1.950403596359764	Down	3.8263638531110082
PDK3	-0.702414	9.017415134787647	-4.59753	2.009697791634741e-5	1.4943086049662408e-4	1.9482962992437816	Down	3.8255597026588455
BAI2	-0.699067	6.435999894826397	-4.59453	2.031679463672811e-5	1.5067356385533304e-4	1.937764892152113	Down	3.8219629393170047
ECHDC3	-1.52591	8.259645892195067	-4.5927	2.0451821955028307e-5	1.5157668756368405e-4	1.93135233443219	Down	3.8193675878924944
VLDLR	-0.962708	8.28161237532097	-4.58934	2.070200660000249e-5	1.533315665268556e-4	1.9195824615231745	Down	3.8143684272906406
CLDN15	-1.09266	10.19622636107696	-4.58887	2.0737463039812213e-5	1.5349479679322667e-4	1.9179259909025292	Down	3.8139063417652297
MYRF	-1.91695	9.13411479362641	-4.58652	2.09148446681053e-5	1.547576750199163e-4	1.9096814770802508	Down	3.810347803463623
LOC101927752	-1.0555	7.06600853880544	-4.58341	2.1151657569395054e-5	1.5600540732759174e-4	1.8987834633495837	Down	3.8068603482363343
LOC440434	-0.656218	8.170146604248043	-4.58113	2.1326155152648723e-5	1.569887721162967e-4	1.8908313103460117	Down	3.8041314073506745
NRK	-2.24851	6.282833835807059	-4.57564	2.175412966398669e-5	1.5957445738453075e-4	1.8716012136177893	Down	3.797036623666478
DOCK4	-1.24182	9.005903146420561	-4.5663	2.250041851533518e-5	1.6431122732599857e-4	1.8389600230125935	Down	3.7843327603681187
LALBA	-0.742864	5.985129932711992	-4.56598	2.2526666693963054e-5	1.6445041713183814e-4	1.83783187224656	Down	3.7839650205831155
POTEKP	-1.1077	5.635908969859736	-4.56422	2.267011012098315e-5	1.6532099027444865e-4	1.8316898829374937	Down	3.7816720019540813
LINC00051	-0.947254	4.159486725809933	-4.56417	2.2674822653141304e-5	1.6532099027444865e-4	1.8314887637228352	Down	3.7816720019540813
KIR2DL3	-0.819328	7.019622366171529	-4.56387	2.2699143384532845e-5	1.6544558824298407e-4	1.8304514821154827	Down	3.7813448092068978
GCNT1	-1.18735	7.863695302823751	-4.55848	2.314535366328231e-5	1.6826900110017035e-4	1.811616175557952	Down	3.7739958833772667
CAV2	-1.89787	8.521325091855617	-4.55808	2.3178335834692996e-5	1.6840176105491935e-4	1.8102384513288845	Down	3.7736533711948326
CDPF1	-0.61329	6.724028026879259	-4.55431	2.349565091186192e-5	1.704906429471896e-4	1.797083360620987	Down	3.7682994514393138
ATP6V0A1	-0.746498	8.348426597384796	-4.55116	2.3764195852988285e-5	1.723846027014962e-4	1.7860888451887105	Down	3.7635015277247943
C11orf95	-1.09954	8.649693117570196	-4.54942	2.391451866822461e-5	1.7336510538983234e-4	1.7799888273002038	Down	3.7610383120598105
ZNF697	-1.18562	7.525449800818242	-4.54899	2.395093978683723e-5	1.7357413727686066e-4	1.778516675107748	Down	3.760514984658936
MARVELD1	-0.696511	7.370541608009096	-4.54623	2.4190377976477263e-5	1.749768124324449e-4	1.768894145739842	Down	3.7570194993128583
RP11-1277A3.3	-0.628629	5.633728268503024	-4.54085	2.4664501060545028e-5	1.7778800244619083e-4	1.7501192343258447	Down	3.7500975495931343
SULT1A1	-0.854034	8.929975859640008	-4.53789	2.4928492105589553e-5	1.7929549540515038e-4	1.7398219147095348	Down	3.7464306214543335
HOXC6	-1.27453	8.78061035781241	-4.53672	2.503397301850849e-5	1.799410206379063e-4	1.7357380902613633	Down	3.744869820501524
ZDHHC14	-1.16411	8.541166199602953	-4.53506	2.518422016446112e-5	1.807370681125175e-4	1.7299508347687178	Down	3.7429527670530334
WNT5A	-2.09338	8.239964644108058	-4.52751	2.5878009890851032e-5	1.851933025626465e-4	1.7036694738592209	Down	3.7323747234460938
COL14A1	-2.03897	6.4413275868472715	-4.52676	2.594761128403009e-5	1.8557530433489352e-4	1.7010720862395408	Down	3.7314798185518825
PRSS12	-1.51745	5.330557039058115	-4.5253	2.6084267301501147e-5	1.8649435987220148e-4	1.6959926517822383	Down	3.729334297975505
GPR155	-0.685021	6.7816677770978195	-4.52423	2.6185333158217215e-5	1.870415976668285e-4	1.6922532532245134	Down	3.7280617965216054
LOC142937	-0.784086	4.988780736589285	-4.5233	2.627271346987632e-5	1.875486463267708e-4	1.689031883578953	Down	3.7268860661170193
CAPRIN2	-0.813098	7.810299066429812	-4.52159	2.6435341831851464e-5	1.8837225134207925e-4	1.6830649695180613	Down	3.7249830716948393
LINC00478	-1.18453	6.883552803686837	-4.52156	2.6437488485485224e-5	1.8837225134207925e-4	1.6829864545926432	Down	3.7249830716948393
REC8	-1.22111	8.243657605542353	-4.52111	2.648047269585614e-5	1.885610752594126e-4	1.6814156323953895	Down	3.7245479539356947
ATXN1	-1.15143	8.978654556053431	-4.51681	2.6893323062061415e-5	1.910252525106809e-4	1.6664575106432666	Down	3.718909217563162
PWAR6	-1.13213	7.2928643557441	-4.51372	2.719311481710616e-5	1.9297496088727413e-4	1.65573953673026	Down	3.7144990384220122
SCARNA13	-1.00836	6.630457251728248	-4.5124	2.7322756381874953e-5	1.9383483511966425e-4	1.6511413881096848	Down	3.7125681708315157
C10orf126	-1.42024	1.7079903742157343	-4.51209	2.735297795519075e-5	1.939890832724145e-4	1.6500726349381631	Down	3.7122227092860123
GNAI1	-1.75554	8.440121231319015	-4.51004	2.7555235709898543e-5	1.953629494288097e-4	1.642950402402394	Down	3.709157796729518
LGALSL	-0.93299	8.520616981061092	-4.50768	2.778962055032938e-5	1.9678078878705848e-4	1.6347622661949217	Down	3.706017302911927
RP11-799D4.4	-1.26498	6.020892025957313	-4.50415	2.81444805281095e-5	1.9892417979691605e-4	1.62249649592576	Down	3.70131242394381
CAHM	-1.08861	5.804763680245208	-4.49707	2.8868912725511712e-5	2.0316575030666947e-4	1.59793165741008	Down	3.692149503605234
PPM1D	-1.20304	7.663843176624259	-4.49686	2.8890216496315337e-5	2.0325315597146328e-4	1.5972186751234991	Down	3.691962702263535
IL1A	-0.706477	6.128083995168034	-4.49497	2.9087439552262912e-5	2.043892903919604e-4	1.5906430986207925	Down	3.689541864141668
MN1	-1.1835	6.595943384844917	-4.49251	2.9344976362900846e-5	2.0607234935752253e-4	1.5821237312046952	Down	3.685980277638839
BC047651	-0.714053	3.430148190236284	-4.48904	2.971211504830834e-5	2.0841639678644615e-4	1.5701077051688008	Down	3.6810681166884924
NT5E	-1.74195	8.892385477059973	-4.48615	3.002153794923806e-5	2.1030703206999923e-4	1.5600959344016632	Down	3.6771462054965696
RP5-855D21.1	-1.29334	5.811874823764413	-4.4833	3.032914994175114e-5	2.1213715118230644e-4	1.5502450060296686	Down	3.67338326764288
CYP4A11	-1.13216	7.28340942121481	-4.48215	3.0454873365661702e-5	2.128863573886264e-4	1.5462477231590492	Down	3.6718521690016974
PTGER4	-1.06783	8.542417557217359	-4.47974	3.071879057653423e-5	2.1420762255425988e-4	1.5379103322013732	Down	3.6691650789086836
RP11-549J18.1	-0.893698	2.760090312836227	-4.47881	3.08213573948419e-5	2.1472650299530688e-4	1.5346895558455629	Down	3.6681143486971513
HSD17B11	-1.41297	9.214537396481203	-4.47615	3.111621942492276e-5	2.1653347957233116e-4	1.525490010565485	Down	3.664474945179424
CRYGD	-0.584696	5.933169568627045	-4.47251	3.152443368731484e-5	2.1895795942078816e-4	1.512897481366566	Down	3.6596392629875067
ANKRD36B	-1.38717	7.520071417558297	-4.47238	3.153916517535329e-5	2.1899379667584455e-4	1.5124461155178706	Down	3.6595681870210988
LOC100505474	-0.868656	6.258193190627515	-4.47111	3.168226364843895e-5	2.1966585489550933e-4	1.508072636625946	Down	3.658237445050018
RGS18	-0.934048	6.302436710803619	-4.46938	3.1879551007546364e-5	2.20888021654044e-4	1.5020754338404112	Down	3.6558278344707986
LOC388692	-1.0088	6.9993646180314295	-4.46697	3.215580302781303e-5	2.225998842581949e-4	1.4937402119596692	Down	3.6524750658146092
LOC101929631	-0.589622	5.741153558464054	-4.46666	3.21914902024669e-5	2.227121573457031e-4	1.4926686913286504	Down	3.6522560751795097
NPNT	-1.92784	7.817156066462574	-4.46252	3.267071653552619e-5	2.2561412288697383e-4	1.4783942613180914	Down	3.6466337180756345
GRIK2	-0.951876	6.228244247768607	-4.45856	3.313711242419297e-5	2.282878636414065e-4	1.464702609054961	Down	3.6415171760860607
CACNA2D1	-1.88825	7.351868141178433	-4.45598	3.344324343069477e-5	2.301196891581551e-4	1.4558206035354564	Down	3.638046221283898
ABR	-1.01827	7.516082569588432	-4.45517	3.354005729660742e-5	2.3065490502898232e-4	1.4530286684848503	Down	3.6370373053983545
RP11-182L21.5	-0.911392	7.299819565834706	-4.45044	3.41121623026056e-5	2.34088830630268e-4	1.436693746700592	Down	3.630619307838468
DOCK3	-0.669681	5.624616556487712	-4.44869	3.432641423884335e-5	2.3541787511106025e-4	1.4306471135942518	Down	3.6281605645708868
PPP2R4	-1.05592	8.0292580873343	-4.4473	3.449704634300447e-5	2.3644635209155165e-4	1.4258585902330383	Down	3.626267381918086
PDE4B	-1.55365	6.372078494268507	-4.4469	3.454546915544765e-5	2.3670733417415e-4	1.424504014830263	Down	3.6257882856196417
MAPKAPK5-AS1	-0.958795	7.848990446828615	-4.44495	3.478751337342108e-5	2.3822314231382847e-4	1.4177615704619069	Down	3.6230160510354668
RXRA	-1.02148	9.177463185215748	-4.44471	3.481737058178614e-5	2.383114092318342e-4	1.4169331287975462	Down	3.622855165174248
LINC00702	-0.771576	5.089735911855876	-4.44468	3.482123524026495e-5	2.383114092318342e-4	1.4168259491212494	Down	3.622855165174248
RASSF8	-1.43096	8.203336975394748	-4.44341	3.497857646366052e-5	2.3917359561030752e-4	1.4124724800240722	Down	3.6212867674666662
ASTN1	-0.716135	5.707376142252565	-4.44253	3.5088709120017636e-5	2.397948624264279e-4	1.4094369154970048	Down	3.6201601258399823
FAM3D	-1.11754	7.177317243180067	-4.44252	3.5090397281510584e-5	2.397948624264279e-4	1.4093904595799964	Down	3.6201601258399823
KRBA2	-0.538964	6.263870938227442	-4.43948	3.547297114306318e-5	2.4204775030782657e-4	1.3989200545217466	Down	3.6160989495173586
AMFR	-0.937803	7.701745329314251	-4.43688	3.580286377399456e-5	2.4415312080036406e-4	1.3899821621400852	Down	3.612337720129745
TMEM71	-1.52311	6.037381717824564	-4.43492	3.605433113429384e-5	2.4557518369202404e-4	1.3832244852942663	Down	3.609815522425637
TAF1L	-1.40981	8.702199442775083	-4.43466	3.608820809620688e-5	2.4573277173604673e-4	1.3823177326662437	Down	3.609536920707412
FAM150B	-2.72	7.443349202365928	-4.43262	3.635075335062367e-5	2.4737325577302765e-4	1.375319299536499	Down	3.606647254981888
TUBG2	-0.73106	6.811748566742219	-4.43005	3.6686007450748224e-5	2.4935804054238524e-4	1.3664562143931098	Down	3.6031766234075606
RARRES2	-1.51593	9.084399719970406	-4.42974	3.672583849262028e-5	2.4955463583981567e-4	1.3654086185159278	Down	3.60283435807215
LOC401176	-0.812079	5.290029315641329	-4.42768	3.69962529292889e-5	2.5124288238919583e-4	1.3583264981196548	Down	3.599906232786904
DST	-1.2436	8.864311909057836	-4.42717	3.706336273280822e-5	2.5162393945516896e-4	1.3565769580744371	Down	3.599248042564247
SERGEF	-0.896321	7.490071107384691	-4.42585	3.723859847431784e-5	2.5251389878302245e-4	1.3520235621059404	Down	3.597714712600177
ZMAT3	-1.03593	8.687145212379377	-4.42546	3.729062780699493e-5	2.527282206472954e-4	1.3506757563572274	Down	3.597346260307669
ZNF700	-1.09713	7.519363710113769	-4.42483	3.737459321708907e-5	2.532109322516378e-4	1.3485046360529802	Down	3.596517547809235
PAXBP1	-0.795349	9.316941192374468	-4.42213	3.773493049011847e-5	2.553497411071933e-4	1.3392426028292723	Down	3.5928645781286854
ZBTB17	-0.732771	7.9839514455654355	-4.421	3.78866324655145e-5	2.5626032186650493e-4	1.335369845869951	Down	3.59131863270932
MAN1A1	-1.59598	8.568069841185801	-4.42096	3.789189513852818e-5	2.5626032186650493e-4	1.3352357764301166	Down	3.59131863270932
LOC283075	-0.711809	5.846297174498059	-4.41547	3.864010269032185e-5	2.6108886870994494e-4	1.316362771928632	Down	3.5832116435385952
PCCA	-1.15004	8.433527916782806	-4.41453	3.877004344744047e-5	2.61734973158451e-4	1.3131225769404962	Down	3.582138242836132
LOC642980	-0.702393	6.1876171274550025	-4.40939	3.948505734982642e-5	2.6624775334709066e-4	1.295486030852245	Down	3.5747140482032638
NFKB1	-0.692863	7.129090430785784	-4.40723	3.978969418448029e-5	2.6822286778041386e-4	1.2880691570572411	Down	3.5715041984177596
EVC2	-0.950835	6.613539157040896	-4.40714	3.980166580199758e-5	2.682245395828874e-4	1.2877788554860006	Down	3.5715014915183354
FZD7	-1.72495	8.785379323996725	-4.40652	3.98903409389372e-5	2.686638535007195e-4	1.285631287161805	Down	3.5707907603668443
PDK4	-1.51914	8.768720606644548	-4.40528	4.0065812661811024e-5	2.696075670263454e-4	1.281395751009323	Down	3.569267922701749
PRRT2	-0.633151	5.948211729898044	-4.4045	4.01764438756338e-5	2.7019308037349373e-4	1.278734906948464	Down	3.5683257774238664
RORA	-1.35177	7.471954948039852	-4.4038	4.02774361272457e-5	2.7063361561094107e-4	1.2763123159071244	Down	3.5676182603340396
LOC101927701	-0.880966	5.403062084717486	-4.4013	4.063595737650692e-5	2.728823213434405e-4	1.267761183320988	Down	3.5640245991475705
SAMD5	-1.17678	6.647739067799415	-4.39969	4.08701896591943e-5	2.740530683507346e-4	1.262215337230054	Down	3.5621653311202146
BTAF1	-0.776985	8.956605606303429	-4.39491	4.156983394614469e-5	2.7825518749381056e-4	1.245838321188958	Down	3.555556730393303
AK021977	-0.615204	6.348222399964926	-4.3933	4.1807910194749846e-5	2.796539291604777e-4	1.2403286307737984	Down	3.55337907442003
LOC101928823	-0.786534	4.103871237417241	-4.39232	4.195385273425874e-5	2.803335854868883e-4	1.2369667180685768	Down	3.552324868283766
RP11-329B9.5	-0.832813	5.098523733579101	-4.39223	4.196620750750575e-5	2.803342661501384e-4	1.2366826550415864	Down	3.5523238137974325
MAML3	-1.24596	8.13113360852792	-4.39061	4.220845195318245e-5	2.8178791136179205e-4	1.2311298469353842	Down	3.550077641962923
ROR2	-1.00336	5.728449121925725	-4.38875	4.2487297677507686e-5	2.8340142377950386e-4	1.224777572495248	Down	3.547597972232423
DLG2	-1.03898	6.220296404032095	-4.38674	4.2792248072931066e-5	2.8510304125235584e-4	1.2178784124820217	Down	3.544998149957914
ZNF177	-0.835659	6.830959712299726	-4.38535	4.3002912261619e-5	2.8625651138597066e-4	1.2131411721454226	Down	3.543244625781019
ARNTL	-0.588036	8.645976888976445	-4.38176	4.3554090756961235e-5	2.8950437025813947e-4	1.2008562368305364	Down	3.5383448759273266
C21orf91-OT1	-0.636669	5.257220184990107	-4.38063	4.372989275028784e-5	2.9041980151925563e-4	1.1969707265874474	Down	3.5369737757220623
ITGA1	-1.01425	7.250345379083344	-4.37937	4.3924653376134136e-5	2.914594386869411e-4	1.192684489467008	Down	3.5354218758282214
DNAJC7	-1.00083	8.519418275069926	-4.37575	4.449205183028584e-5	2.944557864695139e-4	1.180305385842881	Down	3.5309799067642915
LOC101928663	-0.546223	4.570461069301516	-4.37508	4.4597086965661086e-5	2.9498026964075165e-4	1.178031218489445	Down	3.530207031725944
ZFYVE1	-0.872968	8.86649955515175	-4.36227	4.666666677025327e-5	3.0654225352759825e-4	1.1342873727251197	Down	3.5135096542316617
CCDC28A	-1.03556	9.153603502973844	-4.35811	4.735936313391077e-5	3.108246899428412e-4	1.120080668030508	Down	3.5074844909005596
GKAP1	-0.995803	8.474924743379306	-4.35662	4.760946426187416e-5	3.1201860007087337e-4	1.115002541207379	Down	3.505819516022044
SLC22A24	-0.572015	5.632739973592751	-4.35573	4.775892900897227e-5	3.12818934095699e-4	1.1119805509122245	Down	3.50470696813003
C20orf194	-0.919803	7.776343639718969	-4.3542	4.801868475424032e-5	3.141605629088545e-4	1.1067511628668294	Down	3.502848333573676
SSTR5	-0.596221	5.785729389142846	-4.3539	4.806900872830176e-5	3.1439990014145685e-4	1.1057413323745484	Down	3.502517600571628
EPS8	-1.28664	9.026840082315664	-4.35077	4.860263443597266e-5	3.1743638974039923e-4	1.0950981981420125	Down	3.4983432888049566
CD163	-1.36511	8.706923513012121	-4.35016	4.870889573444693e-5	3.1803961915194385e-4	1.0929928526801147	Down	3.497518775275639
SCG5	-1.82243	8.715741634609902	-4.35008	4.8722849902520105e-5	3.180399665962218e-4	1.0927167230422876	Down	3.497518300828302
NOTCH2NL	-1.0007	9.596190097030306	-4.3471	4.923800238752014e-5	3.2077645305526815e-4	1.0825779725081557	Down	3.493797519077058
CD14	-1.4644	8.614211704983251	-4.34468	4.9660294714418955e-5	3.232369510017614e-4	1.0743460293007925	Down	3.490478998457832
IL18R1	-1.47512	5.268286972648597	-4.341	5.031012310931753e-5	3.270944321165319e-4	1.0618150820445047	Down	3.4853268484817037
LAMB1	-1.38114	8.854619108788572	-4.33242	5.185513465658714e-5	3.361001674671343e-4	1.032663484670171	Down	3.4735312711364905
P2RY14	-1.40515	4.372354185809781	-4.33224	5.1888716138123095e-5	3.361160635685499e-4	1.0320396025647345	Down	3.4735107313494065
C2orf40	-1.86919	7.721150770933408	-4.33074	5.216414487540897e-5	3.3770896168774245e-4	1.0269379089017798	Down	3.4714574144611414
SNHG18	-0.942038	6.423988543868331	-4.32886	5.25105348161282e-5	3.3937528984694836e-4	1.0205601289422352	Down	3.4693197821532613
LOC100996756	-0.946646	5.769182578477526	-4.32725	5.2809278332899435e-5	3.4082467672169424e-4	1.0150934998381027	Down	3.467468968552979
RTCB	-0.918456	9.088660045810686	-4.32671	5.291033881541732e-5	3.413806096328068e-4	1.0132512559164022	Down	3.4667611503818856
ACSS3	-1.45073	7.519031684832501	-4.32648	5.2952410618729255e-5	3.415557379605037e-4	1.0124853665394982	Down	3.466538414344248
PPP2R1B	-1.08723	8.330839183633264	-4.32455	5.331537481656976e-5	3.435095636238523e-4	1.0059031368597475	Down	3.4640611672761983
ERMARD	-0.99417	8.38595761556269	-4.32393	5.343098740242488e-5	3.440606700760143e-4	1.0038160001257923	Down	3.463364969184311
LINC00924	-1.21728	5.958204244630727	-4.32235	5.372929487272955e-5	3.456896899305904e-4	0.998451601011829	Down	3.4613135729395816
ATP7B	-0.786045	9.036253961550964	-4.31618	5.490894132351587e-5	3.5238756480805597e-4	0.977527634507214	Down	3.4529794255452613
SLC5A5	-0.930266	7.486225602740919	-4.31557	5.5028017047205074e-5	3.530527207019083e-4	0.9754406967645836	Down	3.4521604373875197
MPEG1	-1.11046	6.9459997727995875	-4.31308	5.551284493528553e-5	3.5556505578790524e-4	0.966990156011314	Down	3.4490809271849505
MRPS18C	-0.576339	8.21910829697707	-4.31089	5.594221322857712e-5	3.5781434063645955e-4	0.9595680024436932	Down	3.4463422575795057
LOC283665	-1.00683	2.7315065821926714	-4.31061	5.599618225389666e-5	3.580594337023202e-4	0.9586391367428204	Down	3.446044879538766
IL15	-1.2408	7.406088230735645	-4.3072	5.6672179150864935e-5	3.61977327412797e-4	0.9470801424466506	Down	3.441318630814565
RCAN2	-1.0243	7.755948499356434	-4.30499	5.7114505002508075e-5	3.643956385812555e-4	0.939591521683794	Down	3.4384268296996687
AGPS	-0.831251	8.006973500267053	-4.30374	5.7365318623924056e-5	3.657918408017722e-4	0.9353710862939152	Down	3.4367659859407573
KCTD9	-1.09417	7.406132301493758	-4.3033	5.745444410539767e-5	3.66258073749622e-4	0.9338758401165056	Down	3.436212792996164
CBY3	-1.33899	5.948279885708955	-4.30022	5.808000775885247e-5	3.6962795480244385e-4	0.9234460170888984	Down	3.4322351907058875
BEX5	-1.33023	8.341949042627085	-4.29906	5.831744267828015e-5	3.709326580584853e-4	0.9195168840675292	Down	3.430704928358625
FBP1	-0.661862	7.825457255946404	-4.29564	5.9023168307128536e-5	3.751086299163316e-4	0.9079326149589032	Down	3.425842944161918
FGF7	-1.48297	6.4094493192891004	-4.28941	6.032837422753627e-5	3.822356338830801e-4	0.8868704136720842	Down	3.417668828329116
RBP7	-1.01554	6.576140810538139	-4.2892	6.037295753551071e-5	3.82412208044006e-4	0.8861590876879335	Down	3.41746825185222
MBNL3	-1.19225	10.097544698433596	-4.2881	6.060558923611031e-5	3.83567157989756e-4	0.8824559999216328	Down	3.416158585324179
AC018462.2	-0.650456	3.8311738228823784	-4.2839	6.150427971827598e-5	3.8871724189901553e-4	0.8682834531626531	Down	3.4103661954234603
BOLL	-0.948678	6.2938480906308145	-4.28093	6.214916858173438e-5	3.9246779684833034e-4	0.85824115647734	Down	3.4061959726125797
LOC101928687	-0.871631	5.029588619819213	-4.27889	6.259469001120702e-5	3.947364698915119e-4	0.8513644486175069	Down	3.4036927470756138
S100A8	-2.25281	8.174695665640266	-4.27853	6.267528521605244e-5	3.9513580888896776e-4	0.8501257050544337	Down	3.4032536109204665
PRKACB	-1.21907	8.845240436789899	-4.27777	6.284266808057489e-5	3.960819292053644e-4	0.8475581499566145	Down	3.4022149713432968
RP11-1081M5.2	-0.677285	5.449804602528888	-4.2776	6.287814832285072e-5	3.961964074575879e-4	0.8470147872063398	Down	3.4020894667793478
SYNPO2	-1.14998	8.184493949702624	-4.27279	6.394717041852067e-5	4.0171535200585786e-4	0.8307862113613647	Down	3.3960815708970826
KCNJ2	-1.31297	7.721652563598854	-4.26391	6.59671923831837e-5	4.1257004886215934e-4	0.8008521839088933	Down	3.3845023034739508
HEG1	-1.6316	10.037445358369714	-4.25976	6.69327992881921e-5	4.1783233694803467e-4	0.7868673063015921	Down	3.3789979520660007
AK097119	-0.540909	4.93729901063743	-4.25176	6.883156329101448e-5	4.285162820503729e-4	0.7599496607232874	Down	3.3680326718264553
ANXA2P3	-0.686748	7.445139263688476	-4.25062	6.91053614996503e-5	4.2998682778093536e-4	0.7561299109337893	Down	3.3665448483964044
RP11-49K24.4	-0.601003	5.525588327516263	-4.25043	6.91513183558485e-5	4.301557946338927e-4	0.7554902603854954	Down	3.366374222337666
LINC00622	-1.17198	5.765702107662491	-4.24965	6.93419065717113e-5	4.311069240364627e-4	0.7528421130165599	Down	3.3654150018580586
TTYH2	-0.727429	6.98347892229355	-4.24924	6.94402490027438e-5	4.314838286077608e-4	0.7514785456421587	Down	3.3650354763752404
LINC01204	-0.600512	5.566373744485068	-4.24633	7.01487490381789e-5	4.3529515303620696e-4	0.7417118567831471	Down	3.3612161686371085
LINC01333	-0.940078	6.051968840071639	-4.24027	7.164941769408718e-5	4.434046598385233e-4	0.7213486301987588	Down	3.3531997470999175
DDR2	-1.00376	8.372082796704724	-4.23826	7.215501850163015e-5	4.461715319726476e-4	0.7145843987840452	Down	3.3504981433789602
RP11-285G1.14	-0.5918	5.253690195151577	-4.23737	7.237949356137931e-5	4.470762508614464e-4	0.7115965028433502	Down	3.3496183996774103
ZFP37	-0.770027	6.430247909869007	-4.23395	7.324810090602158e-5	4.514664064194147e-4	0.7001219749394698	Down	3.3453745599672287
SEPSECS-AS1	-0.865799	5.036649839008957	-4.2317	7.38249843421353e-5	4.544628701879255e-4	0.6925765748155275	Down	3.3425015930387154
LINC00276	-0.685302	4.460873427632412	-4.23167	7.383358051001001e-5	4.544628701879255e-4	0.6924645893966792	Down	3.3425015930387154
NACC2	-0.858126	7.843620915568646	-4.22949	7.439565895381665e-5	4.577994301248981e-4	0.6851705058857105	Down	3.3393247522769545
ANXA3	-1.46871	9.715586991841391	-4.22679	7.510027823194541e-5	4.617627695965276e-4	0.6761045700590387	Down	3.3355810857336854
HCK	-0.786519	6.83211055654081	-4.22465	7.566011967858482e-5	4.645807509732534e-4	0.6689621906822634	Down	3.3329387883353547
ACPP	-0.961858	8.388912013429293	-4.2245	7.570125540539032e-5	4.647086188408707e-4	0.6684394849615245	Down	3.3328192726893713
FOS	-1.478	8.936310418905656	-4.22419	7.5782055717037e-5	4.650798424758823e-4	0.6674135982715708	Down	3.332472483303373
ZSCAN23	-1.21894	6.362272155697045	-4.21815	7.739292503185627e-5	4.7331535199247247e-4	0.6471875163174978	Down	3.324849408953749
CTB-50L17.7	-0.779042	6.799715581581719	-4.21775	7.750150216948429e-5	4.73852717299741e-4	0.6458394922642983	Down	3.3243566245782654
PTRF	-1.41733	10.03178570754736	-4.2163	7.789421076754026e-5	4.7599937183508e-4	0.6409796842202793	Down	3.3223936204071087
AGAP9	-0.544397	5.740409242386469	-4.21122	7.928261664244298e-5	4.8354610663027694e-4	0.6239934438868087	Down	3.3155621091705756
LOC101927709	-0.827563	3.889186817744304	-4.21055	7.9468466448173e-5	4.841968159434754e-4	0.621742429479621	Down	3.3149780707859122
CASD1	-0.886366	7.685060222973685	-4.20913	7.986292646095937e-5	4.863412016237129e-4	0.6169822216717185	Down	3.3130589365189085
LOC101927783	-0.681765	5.247989661869423	-4.20828	8.009905055723617e-5	4.8751960034557225e-4	0.6141440595321095	Down	3.312007919143275
HDAC4	-0.79511	7.810457808733832	-4.20797	8.018424368639233e-5	4.879083274736623e-4	0.6131221214517613	Down	3.3116617694159234
MOSPD2	-1.13784	8.73827759158499	-4.20762	8.028199068785166e-5	4.883732158860298e-4	0.6119509373653367	Down	3.3112481623190253
PPP4R4	-0.973638	4.847961215215492	-4.20456	8.114010479509811e-5	4.925181844340068e-4	0.6017303377109489	Down	3.3075777301337754
FNBP4	-0.828432	8.88341985368255	-4.20085	8.219370901533878e-5	4.982803043354361e-4	0.5893290265992208	Down	3.302526278968794
CRNDE	-2.22425	9.097138054560345	-4.19942	8.260400929599926e-5	5.001050882993297e-4	0.5845428488769482	Down	3.3009387267179204
ATP6V1F	-0.932093	10.213471352509307	-4.1985	8.286792206345242e-5	5.015701557909333e-4	0.5814769115744385	Down	3.29966831260978
RPA3OS	-1.24343	6.346760432026899	-4.19337	8.435750483529747e-5	5.097769025691418e-4	0.5643541549559368	Down	3.292619845826369
SYCP1	-0.911231	6.108429850174729	-4.19218	8.470608636750738e-5	5.112082695864419e-4	0.5603911323372719	Down	3.291402129406169
FGF12	-1.05176	6.31750645194451	-4.18524	8.677094483365851e-5	5.225671089363709e-4	0.537247017685134	Down	3.28185792881644
SEMA3C	-1.55884	9.7021276841363715	-4.18339	8.733050880380611e-5	5.257986081374422e-4	0.5310704869252261	Down	3.279180567866454
DGKH	-1.18253	8.666841918000447	-4.18051	8.820565409426114e-5	5.305092429081494e-4	0.5214899104259967	Down	3.2753070451103556
SULT1A2	-0.608586	8.231701375856025	-4.17619	8.953659596958357e-5	5.369056998754089e-4	0.5071013094959538	Down	3.270101985473719
SLC9A3R1	-0.629958	9.482565270173662	-4.17605	8.958044878399436e-5	5.369429100678562e-4	0.5066308931078316	Down	3.2700718877837707
IMMP2L	-0.774454	8.562296697398352	-4.17341	9.040240314060412e-5	5.411608010083415e-4	0.4978562612198738	Down	3.266673669063184
TNRC6A	-0.715372	8.83354072592768	-4.17184	9.08970068369953e-5	5.439792360511681e-4	0.4926148010666181	Down	3.2644176772145084
TNFSF12	-0.580674	6.817604101691676	-4.1704	9.135062863599544e-5	5.462114547633238e-4	0.4878328018897413	Down	3.2626391963816768
ABCA6	-0.91472	5.69365066990321	-4.16629	9.26585311489704e-5	5.532188241537823e-4	0.4741777089172414	Down	3.257103050748148
NPFFR2	-0.842789	6.293319145995697	-4.1661	9.272067122414912e-5	5.534454048884184e-4	0.4735337730044966	Down	3.25692521403571
PRKCA	-1.62567	8.627011688003412	-4.16391	9.34251260604027e-5	5.57108319178133e-4	0.4662639636922963	Down	3.254060356266493
TNXA	-0.877031	8.66875182208937	-4.15973	9.47878907336434e-5	5.637789249205097e-4	0.45235576870318983	Down	3.2488911628769745
TIFAB	-1.08431	5.580763690293818	-4.15797	9.536620724366806e-5	5.665758129129788e-4	0.44651424617348034	Down	3.2467419694248965
CRIPAK	-1.11736	8.210414305250959	-4.15778	9.54288157150284e-5	5.66777608597981e-4	0.4458839829348928	Down	3.246587315542478
CHGA	-2.02167	5.796420253566564	-4.15757	9.549563956877548e-5	5.669031493757172e-4	0.4452117433488745	Down	3.246491130321261
RP11-493L12.3	-0.552762	5.573305947335705	-4.15746	9.553439213845585e-5	5.669215888456969e-4	0.4448221141385531	Down	3.2464770043989875
TNNI3K	-0.781173	6.148563353087019	-4.15508	9.632120271961204e-5	5.707673651960643e-4	0.43694550306221647	Down	3.243540866532247
SNX25	-0.921024	7.468097920526981	-4.15387	9.672575785459738e-5	5.728678783213392e-4	0.4329207411031888	Down	3.241945528699754
SUSD3	-1.10316	6.8474246831716385	-4.15301	9.701539860696289e-5	5.7443460267306e-4	0.43004960760859046	Down	3.2407594070364025
TSTD2	-0.763704	4.869629394575577	-4.1516	9.748692261085988e-5	5.767787179761735e-4	0.42539391027940887	Down	3.2389907726229334
HLA-DPA2	-0.547707	6.327341625418576	-4.14686	9.909748192424616e-5	5.855504361944287e-4	0.40966082159689154	Down	3.232435691167967
SERPING1	-1.31611	10.22458438935666	-4.14323	1.0034620691898638e-4	5.918557321623151e-4	0.3976384478696699	Down	3.2277841418605364
CTNNAL1	-1.06978	9.089497175495316	-4.14316	1.0037153025874307e-4	5.918557321623151e-4	0.3973962021045008	Down	3.2277841418605364
GNG12	-0.962031	9.047772639316731	-4.14303	1.00417373035546e-4	5.919734804638643e-4	0.39695782160340354	Down	3.2276977485915754
CCNDBP1	-1.01826	8.444654030529241	-4.14198	1.0077858627916328e-4	5.937968775382376e-4	0.3935106772425741	Down	3.22636209045752
COL21A1	-2.13758	5.889993068593719	-4.1407	1.0122627839609923e-4	5.961276765571054e-4	0.3892554557049266	Down	3.224660714612391
DCDC1	-1.76248	3.663974789685187	-4.13788	1.022162390199662e-4	6.007206094368884e-4	0.3799129263553782	Down	3.2213274680839805
CYBRD1	-1.63926	9.884498683674018	-4.13776	1.0225999432496894e-4	6.008234232565394e-4	0.3795020992548688	Down	3.221253144591155
GALC	-1.10002	8.663541379358271	-4.1374	1.023868200819232e-4	6.014141352129193e-4	0.3783123060412183	Down	3.2208263687648837
TBC1D4	-1.47924	9.008008471299632	-4.13629	1.0277969876642756e-4	6.030119389989167e-4	0.3746359746798156	Down	3.2196740892031
DHRS7	-1.22551	9.211773509191666	-4.13588	1.0292204862360415e-4	6.034734880726396e-4	0.3733074358550202	Down	3.2193418046663353
NAB2	-1.07657	7.98250665330344	-4.13525	1.0314780432965858e-4	6.046422278396768e-4	0.3712042639932065	Down	3.2185015252406757
FLG-AS1	-1.14754	3.939635826680088	-4.13476	1.0332164427318893e-4	6.055061217536602e-4	0.36958790072361314	Down	3.2178814617192866
DNER	-1.64904	6.144213390939117	-4.13405	1.0357452048181458e-4	6.066772795963737e-4	0.3672415372914619	Down	3.2170422693227856
RP11-73M18.8	-0.792563	7.627703809869657	-4.13158	1.044594655507133e-4	6.109223191039801e-4	0.3590755366932772	Down	3.2140140082995883
CCDC92	-1.03534	8.69793449738288	-4.12888	1.054375007153323e-4	6.158551388476098e-4	0.3501311176193802	Down	3.2105214303642393
CYB5R4	-0.517938	6.770615746330622	-4.12812	1.0571218623881516e-4	6.171444524005746e-4	0.3476340509532694	Down	3.209613170589368
RNF38	-0.841197	9.407994094366645	-4.12242	1.078094611392618e-4	6.273073909982632e-4	0.32878099254649396	Down	3.202519595531609
PDLIM5	-0.896538	10.176852559553618	-4.11814	1.0940853911396952e-4	6.355950023029394e-4	0.3146527109334487	Down	3.1968195263180075
SORBS2	-1.75741	8.88969260369053	-4.11809	1.09428240485654e-4	6.355950023029394e-4	0.314479942856007	Down	3.1968195263180075
NCR3LG1	-1.01286	6.216739704094667	-4.11735	1.0970821195566968e-4	6.370594368867429e-4	0.3120281543575789	Down	3.1958200466164075
GOLM1	-0.924884	8.9171270271156	-4.11439	1.1083079463369776e-4	6.423754838853798e-4	0.3022602164994508	Down	3.19221104216348
SFTPD	-0.883622	7.655292912356016	-4.11207	1.1171762704395556e-4	6.462674055976382e-4	0.29461375137050894	Down	3.189587747103859
CD79A	-1.21947	7.3692753861767795	-4.1058	1.1415320426408956e-4	6.585252547549434e-4	0.27392380242656333	Down	3.1814275649840544
ATP7A	-0.942148	7.616238455011666	-4.10553	1.1425639862302302e-4	6.589544099057584e-4	0.27305701711109265	Down	3.1811446312500915
CTD-3222D19.5	-0.612323	6.700873210797256	-4.10488	1.1451277242771556e-4	6.602665625941794e-4	0.27090700001238144	Down	3.1802806958339658
SSBP3	-0.820983	8.66968535953949	-4.1047	1.1458324987150822e-4	6.605064685840858e-4	0.2703168067434696	Down	3.1801229248221747
SLC14A1	-1.26663	5.294895434641678	-4.10418	1.14789042997373e-4	6.611929795410114e-4	0.2685955393407866	Down	3.179671766357072
LY96	-1.42437	7.516218083608323	-4.10256	1.1542951347906468e-4	6.644365725044713e-4	0.263258405710034	Down	3.1775464707424015
UNKL	-0.712698	8.569853972060109	-4.10244	1.1547506476089528e-4	6.64475353788864e-4	0.26287995615386706	Down	3.1775211229409646
CD36	-1.05875	6.284161530241479	-4.09627	1.1794784532952544e-4	6.759841566368268e-4	0.2425578639355077	Down	3.1700634827060465
ICA1L	-1.46136	6.772854779218264	-4.09417	1.1880322629100332e-4	6.800903190835027e-4	0.23562775308403516	Down	3.1674334071837253
SELL	-0.752215	7.421803939579583	-4.09099	1.2010475161022098e-4	6.864129851017855e-4	0.22517882539834133	Down	3.163414509389084
KCNK13	-0.740926	5.914849368470123	-4.0895	1.2071854904775922e-4	6.889298288011184e-4	0.2202906061174028	Down	3.1618250110625183
H6PD	-0.53863	9.100247056412606	-4.08744	1.2157711765746158e-4	6.934376044949239e-4	0.21349485694295112	Down	3.158992610643549
NIPAL3	-0.884934	7.945416321885866	-4.08572	1.22294659307597e-4	6.96187984647552e-4	0.20785231419752392	Down	3.157273476378211
LOC101927814	-0.523983	5.332091601282661	-4.08515	1.225349743775934e-4	6.972090720678835e-4	0.20596999092135615	Down	3.156636970495797
GFRA2	-1.00644	6.009433680372542	-4.08494	1.226226820996274e-4	6.973612587018084e-4	0.2052839252520009	Down	3.156542183142105
DECR2	-0.643172	8.79139037679837	-4.08207	1.238345742568892e-4	7.035538178354527e-4	0.1958545183520384	Down	3.152702675919356
ATP11A	-1.42486	9.571745941652772	-4.07999	1.247209578797964e-4	7.077584498581306e-4	0.1890164281207456	Down	3.150114936933043
CISH	-0.649141	8.709803702480707	-4.07774	1.2568257393613043e-4	7.12637325671556e-4	0.18165304737930033	Down	3.1471314344286463
LINC00528	-0.655861	4.729609970146119	-4.07662	1.2616612272433518e-4	7.150247019593917e-4	0.1779717680892512	Down	3.1456789543676673
BC047942	-0.60549	5.7776596891588605	-4.07544	1.2667888550825477e-4	7.17467345581001e-4	0.1740835625223145	Down	3.144197860387285
GOLGA6A	-1.00821	6.243052568248864	-4.07142	1.2843078439799e-4	7.258814022336452e-4	0.16091766931066065	Down	3.1391343304885218
SIK3	-0.591397	8.840475566140562	-4.0696	1.2923648354605115e-4	7.298942253888186e-4	0.15492323548503517	Down	3.1367400722882666
PCED1B	-0.79062	7.397355507331233	-4.06543	1.310898812782991e-4	7.385386342689496e-4	0.14127546083949838	Down	3.131626781041336
IL7	-1.05285	5.241502994382184	-4.06431	1.3159375625611955e-4	7.410124413939847e-4	0.13759867237786505	Down	3.1301745002751993
IGSF11	-0.710003	6.642582326403306	-4.06367	1.318838905218641e-4	7.423996396744679e-4	0.13548797890113207	Down	3.129362247575062
MAFK	-1.03714	8.701401680633607	-4.06262	1.323558264581847e-4	7.447538006730959e-4	0.13206466334143396	Down	3.1279872717891304
TMSB15B	-0.661501	5.241323630766325	-4.05933	1.3385130717580851e-4	7.516897537740115e-4	0.12129738116524091	Down	3.123961369548683
AKT1S1	-0.587364	5.894246314256791	-4.05343	1.365757225277717e-4	7.645425821339221e-4	0.1019895530913395	Down	3.1165983210158466
ACAA2	-1.35587	9.038612912769468	-4.05209	1.3720209872219335e-4	7.671179903873562e-4	0.09760527811604812	Down	3.115137832096475
LINC01115	-0.538501	4.679406917548235	-4.04826	1.3900568754258812e-4	7.762536307754145e-4	0.08509282484445801	Down	3.1099963554826227
AMELX	-0.756104	5.473569750180418	-4.04712	1.395490580813223e-4	7.783463735928646e-4	0.08135519476178743	Down	3.108827093673657
KLK11	-1.29542	8.243830631252957	-4.04512	1.4050378985071664e-4	7.830904282568931e-4	0.0748233202953994	Down	3.1061880843975205
EFNA5	-1.33967	8.57299015211639	-4.0446	1.4075166647992238e-4	7.837082933546225e-4	0.07313475792988822	Down	3.1058455574185118
GALNT10	-0.774825	7.814561263872339	-4.04329	1.413823399209679e-4	7.864543046564125e-4	0.06885200341180742	Down	3.104326506113919
POP1	-0.985561	7.33070192110092	-4.04174	1.4213108950586549e-4	7.90043050730004e-4	0.0637923216394416	Down	3.102349242652512
CMTR2	-0.93322	8.203228813441562	-4.03111	1.4737377634240718e-4	8.152235563196166e-4	0.02909911308845281	Down	3.0887232796495496
CREBL2	-1.01396	9.881774212179906	-4.02729	1.4930266416512378e-4	8.246971640352166e-4	0.01664659599341789	Down	3.083705498884152
ANAPC4	-0.810388	9.437993457903016	-4.02546	1.5023456041006217e-4	8.284445667924347e-4	0.01068836816965834	Down	3.081736545955058
ATG14	-0.711542	9.062032840402903	-4.0251	1.5042032259909003e-4	8.288695955550532e-4	0.00950511653883712	Down	3.0815137907834727
SUPT5H	-0.954161	7.791023500350427	-4.02057	1.527534709271521e-4	8.397036668290036e-4	-0.00523235	Down	3.0758739503271855
RP11-285J16.1	-0.585797	6.443668370241323	-4.01905	1.5354672966162692e-4	8.434563332361014e-4	-0.0101914	Down	3.0739373964482954
ERI1	-0.635847	7.159274191030165	-4.01861	1.537753756223527e-4	8.444603656377328e-4	-0.011616	Down	3.073420729028155
BC041025	-0.954112	6.147117115329491	-4.0146	1.5588736756125648e-4	8.544674370948699e-4	-0.0246751	Down	3.068304483159132
LOC100996255	-0.591419	5.874466012840136	-4.01408	1.5615956406937889e-4	8.557544111001963e-4	-0.0263452	Down	3.067650853555511
HHAT	-1.08275	6.645725811681018	-4.01216	1.5718384733884682e-4	8.60453792553054e-4	-0.0326036	Down	3.065272446868147
LOC100286925	-0.522947	6.145381065776949	-4.01019	1.5823854126166962e-4	8.652819277069166e-4	-0.0390051	Down	3.062842366872191
SNORA76C	-0.921594	7.896713325600166	-4.00915	1.5879849154104073e-4	8.672038432552856e-4	-0.0423863	Down	3.061878806104507
ATP8B2	-1.4374	8.094089166135957	-4.00911	1.5881743534418665e-4	8.672038432552856e-4	-0.0425005	Down	3.061878806104507
ELP5	-0.602922	7.757362466238064	-4.00327	1.6199791792337396e-4	8.811271402127318e-4	-0.0614784	Down	3.054961421543716
C15orf27	-0.530339	6.326080255914793	-4.00327	1.6199831179723406e-4	8.811271402127318e-4	-0.0614807	Down	3.054961421543716
MDC1	-0.888907	8.090885816908314	-4.00251	1.6241712438510436e-4	8.824880829351661e-4	-0.0639518	Down	3.0542911505865336
ENKD1	-0.968813	7.376819064242812	-3.99953	1.640685392778912e-4	8.899298506730377e-4	-0.0736332	Down	3.050644225564422
DYNC2H1	-1.2013	7.282137779029239	-3.99849	1.6464586450648245e-4	8.928496643858288e-4	-0.0769947	Down	3.0492216602872997
RP11-215H22.1	-0.878286	6.118587199147965	-3.99786	1.649975033450147e-4	8.945445210972965e-4	-0.0790362	Down	3.0483980399085455
TRANK1	-0.660807	6.627353539868322	-3.98949	1.6974584214589212e-4	9.164455083261376e-4	-0.106184	Down	3.037893353000537
OSMR	-1.21605	8.939915802380767	-3.9894	1.6979817779599183e-4	9.164455083261376e-4	-0.106479	Down	3.037893353000537
EPHX2	-0.974034	6.882302055314934	-3.98547	1.7206798863731064e-4	9.271652171533278e-4	-0.119183	Down	3.0328428694104264
AASS	-0.863237	5.964296429641086	-3.98514	1.722635178660567e-4	9.280002414074668e-4	-0.120269	Down	3.032451910804934
AGBL2	-1.35916	6.117664535165363	-3.98445	1.7266736189851278e-4	9.297379554897796e-4	-0.122509	Down	3.0316394391031207
ERCC6L2	-0.908017	8.408601168749756	-3.98294	1.7355032334448326e-4	9.340750632371724e-4	-0.127389	Down	3.0296182220142365
LOC389765	-0.727045	7.039281844883088	-3.98151	1.743925365650923e-4	9.374828111073184e-4	-0.132019	Down	3.0280366863838997
HDHD2	-1.02906	8.70256807233599	-3.97741	1.768240471771179e-4	9.48770491408368e-4	-0.145264	Down	3.022838831165526
TBC1D9	-0.985974	8.896979477810959	-3.97275	1.7963627656760877e-4	9.609301780664766e-4	-0.160355	Down	3.0173081673596283
ARSE	-0.770141	6.009155484085962	-3.9715	1.8039315958947883e-4	9.643025930485248e-4	-0.164376	Down	3.0157866654016363
AGA	-0.81126	8.351192671011365	-3.97139	1.804580076461009e-4	9.644239095854104e-4	-0.16472	Down	3.015732031317923
BC048141	-0.571249	6.016043502226426	-3.97048	1.8101452267076204e-4	9.6626954367344e-4	-0.167665	Down	3.0149017089870007
UBQLN1	-1.06541	9.232499381618815	-3.96972	1.8148362473980505e-4	9.683217934752798e-4	-0.17014	Down	3.013980293614522
RP11-774O3.3	-0.562829	6.030775085258795	-3.96944	1.8165502921942364e-4	9.690103552136148e-4	-0.171042	Down	3.0136715818882416
LOC100128288	-0.923067	6.046050171764044	-3.96788	1.8261275392703757e-4	9.736651589598444e-4	-0.176071	Down	3.011590370244497
SYNC	-0.640637	7.033755107890086	-3.96685	1.832471986545101e-4	9.7636531393026e-4	-0.179387	Down	3.010387657600059
EXTL3-AS1	-0.522264	5.494857837132895	-3.9646	1.8464629332121444e-4	9.826756326811038e-4	-0.18666	Down	3.007589812975494
SERPINB6	-1.13054	8.722686804618583	-3.96402	1.8500778918907607e-4	9.841416435379846e-4	-0.18853	Down	3.006942390816699
SMAD4	-0.94131	8.532003011002784	-3.96294	1.856847884887635e-4	9.86895217948705e-4	-0.192023	Down	3.0057289554178737
TCEAL1	-0.970779	9.063021825697128	-3.96236	1.8604735334594032e-4	9.883457758083783e-4	-0.193888	Down	3.0050910895682117
TFAP2A-AS1	-0.888248	7.766040832174683	-3.96031	1.8733673991916275e-4	9.94911158916092e-4	-0.200491	Down	3.0022156980634294
TBXAS1	-0.771178	6.760440566892108	-3.95939	1.8792013993930667e-4	9.973149806707022e-4	-0.203464	Down	3.0011676573722705
LATS2	-1.18889	9.491782065357592	-3.95807	1.8876107642210523e-4	0.00100140227677302	-0.207733	Down	2.9993914255306438
C22orf42	-0.873873	5.815658194272795	-3.95804	1.8877783206093155e-4	0.00100140227677302	-0.207818	Down	2.9993914255306438
TRIM35	-0.574248	6.490762235618612	-3.95711	1.8937384147726157e-4	0.00100363310612885	-0.210831	Down	2.998425021359082
PIK3CD	-0.808288	8.481776255028151	-3.9536	1.916287095710249e-4	0.00101464319515748	-0.222147	Down	2.9936866529399415
FKBP5	-1.10367	9.035725137126429	-3.95292	1.9206649874601312e-4	0.00101672591966914	-0.224328	Down	2.9927961047150227
RUFY3	-0.99111	8.882117462792195	-3.9509	1.9337763102765697e-4	0.00102212986020283	-0.230831	Down	2.9904939241751425
GGTA1P	-1.2948	8.001500496346837	-3.94824	1.9511679782197809e-4	0.00102872394399957	-0.239389	Down	2.987701151653807
NEFH	-2.08031	7.203703440156879	-3.94564	1.9683232013765857e-4	0.00103572370111073	-0.247756	Down	2.9847560854083746
FAM13B	-1.18889	9.14237293944652	-3.94483	1.973721180557981e-4	0.00103828967123023	-0.250373	Down	2.983681466269392
EBLN2	-0.596527	7.573170441805948	-3.9447	1.9745611082314644e-4	0.00103828967123023	-0.25078	Down	2.983681466269392
GALNT18	-0.807381	7.112746800411882	-3.94437	1.9767453886682305e-4	0.00103919939676793	-0.251836	Down	2.983301114033215
LOC400756	-0.566829	5.757228060380084	-3.94398	1.9793768294139031e-4	0.00104034372800736	-0.253108	Down	2.9828231467460777
STAG3L3	-0.61497	5.933209784248978	-3.94182	1.9938049255553255e-4	0.00104648458113742	-0.260049	Down	2.980267166155937
GNAT3	-0.684836	4.792962960780941	-3.94157	1.9954870378615207e-4	0.0010471272463127	-0.260855	Down	2.980000539893664
LOC102723742	-0.625562	4.829692269957592	-3.93593	2.0336916354080087e-4	0.00106375928044124	-0.278977	Down	2.973156638021961
DHFRL1	-0.72525	7.795193083984049	-3.92817	2.0874619281426217e-4	0.00108840112702769	-0.30391	Down	2.9632110171847703
WDR73	-0.554714	8.064182817439331	-3.92779	2.0901136424205735e-4	0.00108953543005104	-0.305123	Down	2.9627586425857153
BMP4	-1.26354	7.682695232168371	-3.92762	2.091353041992365e-4	0.00108993317193037	-0.305689	Down	2.962600129537924
CDH11	-1.5736	9.132194898886391	-3.92646	2.0994926853695644e-4	0.00109293044706644	-0.3094	Down	2.961407475210753
ZNF658	-0.703333	6.071693966378824	-3.92606	2.1023398842221928e-4	0.00109416365357414	-0.310694	Down	2.9609177159105533
CITED2	-1.22027	7.689509540961978	-3.92457	2.1128441935375713e-4	0.00109888070706856	-0.315456	Down	2.9590494514107846
ATP6AP1	-0.93193	9.46176877861712	-3.92387	2.1178172909395228e-4	0.00110065697783278	-0.317701	Down	2.9583480087719427
BTN3A3	-1.04982	7.475319994194211	-3.92308	2.123481123209509e-4	0.00110315905126953	-0.320253	Down	2.9573618673341495
TIMP1	-1.29639	10.717511230721144	-3.92247	2.1278306349212703e-4	0.00110491686555523	-0.322207	Down	2.9566703972629043
RP11-68I3.11	-0.520551	4.948139828068573	-3.92237	2.128527872378815e-4	0.00110502811872373	-0.32252	Down	2.9566266707108335
MIR3185	-0.576746	6.360817967581206	-3.92161	2.1339283373853624e-4	0.0011073292454307	-0.32494	Down	2.9557232298765626
IKZF4	-0.688962	6.862184490418726	-3.92048	2.142085673091738e-4	0.00111030308370335	-0.328585	Down	2.9545584539945664
RP3-388M5.9	-0.861831	5.971099985275709	-3.92027	2.1435693571824203e-4	0.00111082046031657	-0.329246	Down	2.9543561295332768
PRSS27	-0.95108	5.019887126184731	-3.9189	2.1534743466215665e-4	0.00111560816886337	-0.333649	Down	2.9524883143420793
GSAP	-1.18577	8.707902084856457	-3.91766	2.1624017640845997e-4	0.0011195652853698	-0.337601	Down	2.9509505762706065
TPM2	-1.58055	8.95959685764771	-3.91733	2.1648410087505543e-4	0.00112032113637647	-0.338677	Down	2.9506574703964774
CTD-2194D22.4	-0.744727	4.136853619219684	-3.91544	2.1786156050562975e-4	0.00112566726350684	-0.344735	Down	2.948589963816861
PTGFRN	-1.08651	8.674808470998178	-3.91418	2.1877899873804283e-4	0.00112964222796833	-0.348748	Down	2.9470590813145408
SETX	-0.69674	8.468462871253536	-3.91063	2.2139664112011176e-4	0.00114109793921762	-0.360106	Down	2.942677078950428
CHST15	-1.03969	9.787098546919188	-3.90915	2.225033939382881e-4	0.00114473918370004	-0.364868	Down	2.9412934513002256
AP1AR	-0.866975	6.8846849214378985	-3.90782	2.2349472567729936e-4	0.00114958089675605	-0.369113	Down	2.939460461733927
ME1	-0.918731	8.361723718542397	-3.90722	2.239440266511384e-4	0.00115163303793018	-0.371031	Down	2.9386858846197987
PAN3-AS1	-0.806455	5.329205775875135	-3.90709	2.240391544380979e-4	0.00115186332907623	-0.371436	Down	2.938599047778442
DCBLD2	-0.731137	8.130915070119359	-3.90665	2.2437102687124905e-4	0.00115331042996794	-0.372849	Down	2.938053780410099
NCF2	-0.918899	7.111955195495756	-3.90492	2.2567631836418808e-4	0.00115906802475699	-0.378388	Down	2.9358910748995135
HPS5	-0.764975	7.386121617958884	-3.9025	2.2751259991168603e-4	0.00116785413398368	-0.386125	Down	2.932611397602028
CCDC101	-0.644081	8.157296139293981	-3.90068	2.2890086309891792e-4	0.00117448370640057	-0.391933	Down	2.930153003807113
FAM185A	-0.541149	6.518773954567751	-3.8987	2.30421927973288e-4	0.00118043512989271	-0.398256	Down	2.927957874323272
GRAMD1B	-0.565656	7.863501945046187	-3.89841	2.306459194442728e-4	0.00118131810856626	-0.399183	Down	2.9276331386335452
DDX50	-1.06696	9.02004881697963	-3.89805	2.309258111045525e-4	0.00118248693649531	-0.400341	Down	2.9272036484246873
ISL1	-0.783147	6.598853074145328	-3.89603	2.3249208506062624e-4	0.00118944240029116	-0.406794	Down	2.924656584178535
COL8A1	-2.19462	8.690528559069824	-3.89512	2.3319839154211825e-4	0.00119198972298751	-0.409689	Down	2.923727488949017
RPP25	-0.724116	7.496863436558984	-3.89083	2.3657068333385943e-4	0.00120653157913405	-0.423394	Down	2.9184613066070977
F13A1	-1.07472	8.039035303508886	-3.88741	2.3928675175580977e-4	0.00121739861984015	-0.434289	Down	2.9145671949406142
FAM13A	-1.10046	9.051920373838708	-3.88685	2.3973799377876453e-4	0.00121888123548096	-0.436087	Down	2.9140386088098644
PCDHB16	-1.83994	6.362119359918651	-3.88511	2.411341650320905e-4	0.00122461899262357	-0.441628	Down	2.911999009372235
GLI2	-0.638101	7.687062290447573	-3.87693	2.478093512738448e-4	0.00125462052396421	-0.467684	Down	2.9014876122462403
RAB5C	-0.798686	6.952352780150431	-3.87623	2.4839376243688914e-4	0.00125674500017549	-0.469932	Down	2.900752833890231
GLIPR1	-0.762335	8.027164891783029	-3.87591	2.4865588117556223e-4	0.0012577930367932	-0.470938	Down	2.900390813877355
DENND1A	-0.503532	7.366048191264351	-3.87393	2.502987588926401e-4	0.00126442598911563	-0.477221	Down	2.898106586216268
RP11-359E8.5	-0.860112	6.27500006013131	-3.87374	2.5046253627526943e-4	0.00126497403254787	-0.477845	Down	2.897918389616164
CHD9	-0.789328	8.828098961784148	-3.86973	2.5383533037406133e-4	0.00127946651765326	-0.490606	Down	2.892971074676126
FOXP2	-1.0603	7.936386986661871	-3.86791	2.553758981519105e-4	0.00128609843139281	-0.496378	Down	2.8907257914624678
FDXR	-0.945973	7.331873575062562	-3.8664	2.5666577008144885e-4	0.00129174134485118	-0.501183	Down	2.888824439707569
PIGH	-0.88158	7.475226742285136	-3.86462	2.5819208146136117e-4	0.00129828057840757	-0.506839	Down	2.8866314396728026
BTK	-0.729042	6.554669619844655	-3.86454	2.582600404290665e-4	0.00129833695121437	-0.50709	Down	2.886612582526036
GSDMC	-0.736817	7.554747836855147	-3.86249	2.600258886480982e-4	0.00130635316345626	-0.513589	Down	2.883939398707038
MUM1	-0.571495	8.855479750365522	-3.86091	2.613968644190344e-4	0.00131295254907641	-0.518604	Down	2.8817509693002075
KLF3-AS1	-0.555669	6.980425858693742	-3.85987	2.6230869835685335e-4	0.00131618479782407	-0.521925	Down	2.8806831296880118
MYH3	-0.578522	5.375466657921803	-3.85874	2.632958254094634e-4	0.00132075097337055	-0.525508	Down	2.8791790605734078
AF198444	-0.544643	5.16867227014531	-3.85861	2.634142237386132e-4	0.00132105524439187	-0.525936	Down	2.8790790205134984
CNIH3	-0.816738	6.466062516411178	-3.85788	2.6405373187438666e-4	0.00132339218653977	-0.528249	Down	2.878311433809606
LOC153682	-0.687146	6.375581137940127	-3.85638	2.6537276314280914e-4	0.00132917894374716	-0.533001	Down	2.8764165472359764
HSDL2	-0.932622	8.291204852131301	-3.85372	2.6773274149909196e-4	0.00133952253768643	-0.541443	Down	2.873049974918401
MYO5A	-1.08826	8.774361859558509	-3.85327	2.68132899974855e-4	0.00134089893301086	-0.542867	Down	2.872603954802989
COX7A1	-0.710506	6.508808398375267	-3.85273	2.6861402086610206e-4	0.00134271797758259	-0.544577	Down	2.872015196297473
IGFBP1	-0.665491	6.621365962714776	-3.85019	2.7089024708404493e-4	0.00135291376621608	-0.552623	Down	2.868729884148889
SSUH2	-0.877779	6.530609328594442	-3.84949	2.71526227058433e-4	0.0013549069899389	-0.554858	Down	2.8680905167030195
MAPK8IP1	-0.562445	5.602193905414989	-3.84836	2.725423283182499e-4	0.00135826216535234	-0.55842	Down	2.8670163964935926
TAF6L	-0.918141	6.757714793779931	-3.84835	2.7255481450817824e-4	0.00135826216535234	-0.558463	Down	2.8670163964935926
RNF146	-0.947906	9.480195067111437	-3.84701	2.737679622206898e-4	0.00136312017576652	-0.562698	Down	2.865465854090842
MZF1	-0.663659	8.30102007785283	-3.84546	2.751835826751455e-4	0.00136987058051015	-0.567615	Down	2.863320461183205
CCDC64	-1.30335	9.153421741325992	-3.84483	2.7575641460887506e-4	0.00137212505651075	-0.569597	Down	2.862606304899325
PRR15	-1.18721	7.327079640161868	-3.83998	2.8023738204782016e-4	0.00139079198782474	-0.584963	Down	2.856737819896693
RP1-142L7.9	-1.01264	4.923215086211874	-3.83892	2.812235834291541e-4	0.001394476455413	-0.588311	Down	2.855588814040839
SEMA3D	-0.736844	5.001771879489018	-3.83803	2.820590459245672e-4	0.00139831612388042	-0.591139	Down	2.854394634501138
C7orf60	-0.928255	7.979795514943133	-3.83729	2.8275262948810817e-4	0.00140145091205771	-0.59348	Down	2.8534221094597556
TLL1	-0.95385	5.5514533586512105	-3.83634	2.8364070019790626e-4	0.00140463347722217	-0.596469	Down	2.8524369850728006
SGK1	-0.982888	9.779113267181136	-3.83321	2.865998338479662e-4	0.0014174486810652	-0.60636	Down	2.8484926558450434
DPP9	-0.766806	9.023311035222653	-3.82951	2.9013824992644494e-4	0.00143005307216157	-0.618054	Down	2.8446478446893364
ARHGAP15	-0.87709	6.3573030340876295	-3.82777	2.9181652772793635e-4	0.00143610891329048	-0.62355	Down	2.842812622316975
LOC101243545	-0.542658	7.13234348816192	-3.8264	2.931503306793491e-4	0.00144112299433021	-0.627896	Down	2.841298952232898
DSEL	-1.67424	6.51856979164092	-3.8251	2.944086235875213e-4	0.00144669613045622	-0.631977	Down	2.83962268016274
SSBP3-AS1	-0.711042	7.524568419193596	-3.8251	2.9441079153713124e-4	0.00144669613045622	-0.631984	Down	2.83962268016274
C2orf80	-0.63686	4.9891131077966495	-3.82392	2.9556818768396663e-4	0.00145113831888872	-0.635722	Down	2.8382911897213905
OR2F2	-0.863258	3.3053582448907437	-3.82323	2.9624355727442443e-4	0.00145319904764754	-0.637897	Down	2.8376748954236595
CATSPER2	-0.506462	7.012668834635917	-3.82316	2.963055009954887e-4	0.00145319904764754	-0.638096	Down	2.8376748954236595
CD1D	-0.602017	5.761033850311814	-3.8228	2.966643387090639e-4	0.00145402386575078	-0.639249	Down	2.837428465087154
BST1	-1.15009	6.7781430405691765	-3.82145	2.979880159831297e-4	0.00145957349982402	-0.643491	Down	2.8357740303338863
C3	-1.57213	11.31938257636306	-3.81793	3.014839847934215e-4	0.00147259865245275	-0.654603	Down	2.831915601273824
SLC32A1	-0.628143	6.019129647466711	-3.81211	3.0734405252692284e-4	0.00149898200336036	-0.672941	Down	2.8242035812199036
KIFAP3	-0.733452	8.338276546472924	-3.81137	3.0809826131868726e-4	0.001502020055553	-0.675275	Down	2.82332426842516
EID3	-1.02404	6.24200060477455	-3.8099	3.0959721195431195e-4	0.00150836341829273	-0.679898	Down	2.8214940089011677
SPI1	-0.691299	4.885757140668553	-3.80867	3.1086291020086435e-4	0.00151227567988211	-0.683784	Down	2.820369032023849
LOC100507562	-0.707713	6.707541998924985	-3.80718	3.123913978644234e-4	0.00151874262467916	-0.688455	Down	2.818515818074186
GABARAPL1	-1.32158	9.740467900779764	-3.80669	3.12901211639141e-4	0.00152068348607608	-0.690008	Down	2.8179611702698475
CMTM2	-0.605865	5.481926274594098	-3.80567	3.1395901165756456e-4	0.00152474383946368	-0.693222	Down	2.8168031126791213
LOC728705	-0.78646	6.222404645674598	-3.80467	3.1499368689660477e-4	0.00152879519781659	-0.696355	Down	2.815650690137392
C1S	-1.30154	10.64542561639248	-3.80421	3.1547680980924015e-4	0.00153081525591211	-0.697815	Down	2.815077218301843
KLHL36	-0.919973	9.108551554676367	-3.80397	3.157300045104315e-4	0.0015317189934678	-0.698579	Down	2.8148209023145214
LOC101928401	-0.828811	5.159533201767519	-3.80073	3.1912365966542947e-4	0.00154588825100261	-0.70876	Down	2.8108219035140842
NEK5	-1.08972	6.439873134298011	-3.79852	3.2146357497270754e-4	0.0015555763815145	-0.715716	Down	2.8081086594149047
GXYLT2	-1.28953	8.300493925792088	-3.7932	3.27148895155747e-4	0.00157841408103507	-0.732407	Down	2.8017790533966704
RUNDC3B	-1.15828	6.86272469440975	-3.79081	3.2974326684299607e-4	0.00158892085132706	-0.739927	Down	2.798897735698865
MSANTD2	-0.821169	7.493781170840241	-3.78913	3.31573627638744e-4	0.00159639583896187	-0.745196	Down	2.7968594128839137
SFSWAP	-0.657554	8.721611827703835	-3.78187	3.396006930869021e-4	0.00162949478716624	-0.767964	Down	2.787947024525967
CDRT4	-0.696342	7.557621380982754	-3.78181	3.3965910398163534e-4	0.00162949478716624	-0.768128	Down	2.787947024525967
TPT1P8	-0.581579	5.88626	-3.78113	3.4042020211344943e-4	0.00163280373252696	-0.770258	Down	2.7870660155102556
NHLRC4	-0.613864	7.398713997906699	-3.78096	3.406165140140468e-4	0.00163324298557427	-0.770807	Down	2.786949198335107
TGFBR2	-1.12144	9.389503672219838	-3.77997	3.4172577134411393e-4	0.00163666399886581	-0.773901	Down	2.786040470506349
PTMAP1	-0.595446	6.585709905729059	-3.77926	3.4252078461856285e-4	0.00163978510803266	-0.776113	Down	2.7852130620196878
RHOBTB3	-1.39497	8.238368303979552	-3.77445	3.4798772759237525e-4	0.00166282606925354	-0.791181	Down	2.7791531753829206
ZNF337	-0.543416	8.184082478532696	-3.77322	3.494057998974148e-4	0.00166855673050573	-0.795051	Down	2.7776590228559064
NAIP	-1.1032	7.190693251984495	-3.77024	3.528359133964063e-4	0.00168212812306655	-0.804346	Down	2.7741409282636353
MINOS1P1	-0.502667	5.848996886277098	-3.77007	3.5303450735201804e-4	0.00168237377498579	-0.804881	Down	2.774077510095706
PCNXL4	-0.79722	8.08135999192536	-3.76839	3.549966734523281e-4	0.00169101996500433	-0.810154	Down	2.7718512648800666
LINC00849	-0.777352	7.448586360147359	-3.76823	3.551784163405705e-4	0.00169128582092924	-0.810641	Down	2.7717829920693187
GRHL3	-0.853269	6.164011872456525	-3.76723	3.5634541040932137e-4	0.00169532681321581	-0.813762	Down	2.7707465691453126
ACBD4	-0.544842	6.992177610025977	-3.76629	3.5744776470517396e-4	0.00169986435433167	-0.8167	Down	2.769585733042692
LINC01165	-0.591652	5.79138326701767	-3.76272	3.616719430493717e-4	0.0017185238598186	-0.827876	Down	2.7648444337824305
LOC100507487	-0.901652	6.90303652367232	-3.75907	3.660280709635243e-4	0.00173561787265792	-0.839264	Down	2.760545886339123
LOC100996251	-0.725699	4.023763593284613	-3.75682	3.687401197848205e-4	0.00174702944720582	-0.846286	Down	2.7576997746672043
C1orf101	-0.868023	6.432918956425871	-3.75589	3.6986944327406176e-4	0.00175165452135525	-0.849194	Down	2.756551545579007
LILRA3	-0.555775	5.58514252435553	-3.75127	3.7551615853113456e-4	0.00177407331671431	-0.863603	Down	2.7510284361466244
RP11-219B4.3	-1.13468	5.882098301995739	-3.7496	3.775686975188136e-4	0.00178314538539715	-0.868786	Down	2.7488132459992625
ZNF395	-1.10138	9.702905909931085	-3.74811	3.7941891727701814e-4	0.00179057867334589	-0.873434	Down	2.7470065924686833
MLXIP	-0.742766	8.369839000707957	-3.74532	3.829031693671496e-4	0.00180478813596024	-0.882126	Down	2.7435737725859006
CYP39A1	-0.636284	7.651110341085078	-3.74493	3.8339933291604194e-4	0.00180638248306963	-0.883357	Down	2.743190286857928
MITF	-1.12915	8.479463163537805	-3.74451	3.839187140040374e-4	0.00180845712532393	-0.884644	Down	2.742691782979747
GNPDA2	-0.857531	7.397661453045424	-3.74417	3.843491010053367e-4	0.00181011179125177	-0.885709	Down	2.7422946025758317
ADIRF	-1.20641	6.45350783023655	-3.74393	3.846592315285808e-4	0.00181119953861749	-0.886476	Down	2.742033701123395
HIST1H2AK	-0.977551	6.126870335095045	-3.73942	3.9037131608729813e-4	0.00183545115921933	-0.90049	Down	2.736257167446427
RPA3	-0.916002	8.142635536447528	-3.7387	3.9130193731567054e-4	0.0018383509217938	-0.902753	Down	2.735571582802138
SLC6A16	-0.552184	6.876525564611693	-3.73752	3.928056767391077e-4	0.00184386562948585	-0.906399	Down	2.7342707310584826
RP11-548H18.2	-0.770681	5.80756392102137	-3.73738	3.929933677763926e-4	0.00184433037328912	-0.906853	Down	2.7341612815226255
SGTB	-0.946704	7.239454457507107	-3.73176	4.0027926422200736e-4	0.00187356572956941	-0.924313	Down	2.727331066120462
STX2	-0.610157	7.893205429724765	-3.73026	4.0225317919371655e-4	0.00188126543065679	-0.928989	Down	2.725549924844613
LINC01189	-0.972085	3.809594316937067	-3.72829	4.0484405267598864e-4	0.00189106310354715	-0.93509	Down	2.7232939787884565
PLEKHB2	-0.90648	9.555350081883876	-3.72637	4.07395359782519e-4	0.00190103986058826	-0.94106	Down	2.7210087768473206
MEIS3P1	-0.841338	8.205429154574615	-3.72556	4.084706591390236e-4	0.00190411577229863	-0.943565	Down	2.720306649574494
LOC101929841	-0.777004	7.316991864100455	-3.72411	4.1041500125505863e-4	0.00191005944249178	-0.948077	Down	2.7189531169698293
TXNDC12	-0.749136	10.160291040571352	-3.72406	4.104797301702425e-4	0.00191005944249178	-0.948227	Down	2.7189531169698293
CPE	-1.58776	10.169197916465146	-3.72361	4.110760775694678e-4	0.00191158731274631	-0.949607	Down	2.718605860565218
GALT	-0.568942	7.672159587846412	-3.72141	4.140500921834519e-4	0.00192268156262739	-0.956456	Down	2.716092638302074
RND1	-0.697463	5.789122318119583	-3.72016	4.1573237631635425e-4	0.00192971009083827	-0.960308	Down	2.7145079321354553
USP20	-0.882815	7.620371569220524	-3.7191	4.1717439650441814e-4	0.00193561813377095	-0.963598	Down	2.7131803178716543
SPOCK2	-1.62194	9.869027171549716	-3.71813	4.184984985509818e-4	0.00194058110019211	-0.966609	Down	2.7120682026379965
NUDT11	-0.796536	7.774182093342168	-3.71582	4.216687944165794e-4	0.00195211662231018	-0.973779	Down	2.709494240504961
FERMT2	-0.976425	9.526552107416048	-3.7154	4.222426117157025e-4	0.00195437764787448	-0.97507	Down	2.708991513011842
RAB8B	-1.04611	9.353074835037276	-3.71484	4.230106870102126e-4	0.00195753671280474	-0.976797	Down	2.7082900841772988
SYNE2	-0.998244	9.238271490570662	-3.71358	4.247522080832843e-4	0.00196400682472462	-0.9807	Down	2.706857007417148
CLCN7	-0.980635	9.179518424610825	-3.71286	4.257501322310329e-4	0.0019678257121846	-0.982929	Down	2.7060133691101522
ARHGAP22	-0.54646	6.227892599849816	-3.71207	4.268549792547697e-4	0.00197094148746112	-0.985391	Down	2.7053262686936463
UBXN8	-0.901593	6.782960269930387	-3.70718	4.3370724573739953e-4	0.00199372876737511	-1.00052	Down	2.7003339246825946
IGFBP5	-1.38072	9.17437541498557	-3.70681	4.342382820905567e-4	0.00199576891441338	-1.00168	Down	2.6998897461173224
ART3	-0.59207	4.68978309960083	-3.70636	4.3486889591772346e-4	0.00199786455214891	-1.00306	Down	2.6994339586767544
C9orf72	-0.543475	8.57832759892539	-3.70628	4.349751536076163e-4	0.00199795152366766	-1.00329	Down	2.6994150532767236
FAM46A	-0.748083	8.455842456725819	-3.70568	4.358304517438309e-4	0.00200147830298014	-1.00515	Down	2.698649113501456
FAM206A	-0.71936	9.253654605357143	-3.70502	4.367715585998824e-4	0.00200499528274612	-1.0072	Down	2.697886644829205
RAB9B	-0.608439	6.271468438870202	-3.70491	4.3692641019071464e-4	0.00200503378798254	-1.00754	Down	2.6978783044349552
C8orf44-SGK3	-0.83647	8.371132857818044	-3.70438	4.3768226628934426e-4	0.0020074414200824	-1.00918	Down	2.697357119178129
LOC153577	-0.60133	5.394947378798345	-3.70434	4.377431375842955e-4	0.0020074414200824	-1.00931	Down	2.697357119178129
ZNF106	-0.596881	8.59596807474796	-3.70062	4.4307204418556897e-4	0.00202659842041616	-1.0208	Down	2.693232300184946
EDNRA	-1.05913	8.052098270846558	-3.70031	4.435190426628539e-4	0.00202823749292093	-1.02176	Down	2.692881193408619
KAL1	-1.67692	8.196238227609795	-3.69751	4.475757626584333e-4	0.00204433736751093	-1.03041	Down	2.6894474330196108
ACAD11	-0.894077	8.386730090371529	-3.69726	4.479459557251354e-4	0.00204561986447811	-1.03119	Down	2.6891750676414095
KLF11	-0.688806	8.411330558887547	-3.69703	4.482827605531e-4	0.00204674940704337	-1.03191	Down	2.6889353267563245
ZNF211	-0.615101	7.811252854181229	-3.69661	4.488947661235142e-4	0.00204891478013066	-1.0332	Down	2.6884761046972314
ID2	-1.10527	8.552679689561797	-3.69582	4.500479863854793e-4	0.00205276074172914	-1.03564	Down	2.687661666607025
PTPN13	-2.00791	7.954160431086675	-3.69338	4.536271204694407e-4	0.00206784915107	-1.04316	Down	2.684481146065239
BTF3P11	-1.02834	5.675161015196212	-3.6905	4.578967869695178e-4	0.00208274763202298	-1.05205	Down	2.681363350628268
LOC100130872	-0.831174	8.637085782268713	-3.69017	4.583853423871086e-4	0.00208372705115729	-1.05306	Down	2.681159170180441
EEF1A1P42	-1.07459	7.274168805155065	-3.68655	4.638053149208255e-4	0.00210460170568694	-1.06422	Down	2.6768300819609445
MICAL2	-1.17078	8.811328374054678	-3.68585	4.64859041435715e-4	0.00210820501903747	-1.06638	Down	2.676087157070925
BC044765	-0.585638	4.076805876929285	-3.68546	4.6545868969131646e-4	0.00211042991705264	-1.0676	Down	2.675629065278195
LOC100132352	-0.567942	6.261361907503766	-3.68029	4.733331849493147e-4	0.00214188883276411	-1.08352	Down	2.669203073452799
NOL4L	-1.13525	8.1495034063741425	-3.67563	4.8053844173535974e-4	0.00217105825601565	-1.09786	Down	2.6633285229635026
TTC28	-0.965775	8.61345821964575	-3.67555	4.806615256081728e-4	0.00217118559612821	-1.0981	Down	2.6633030508296893
LINC00052	-1.51867	2.7017216624887026	-3.67341	4.84000532610193e-4	0.00218333619392539	-1.10467	Down	2.660879385717865
ADRBK2	-0.83409	7.777038063127759	-3.67028	4.889423062009905e-4	0.00220337030206272	-1.11431	Down	2.6569125084652696
TTLL5	-0.658132	8.050434788633838	-3.66677	4.945350533643522e-4	0.0022233184291458	-1.1251	Down	2.652998332120099
MEF2D	-0.784083	8.5119510838983	-3.66438	4.983751790044962e-4	0.00223926271022071	-1.13243	Down	2.6498949520189137
BICC1	-1.0386	8.37491655113347	-3.66355	4.997190181461521e-4	0.00224397868815815	-1.13499	Down	2.6489812720412176
SPARCL1	-1.36513	9.818664392241107	-3.66215	5.019902031235904e-4	0.00225196742299306	-1.13929	Down	2.647437896288135
FEZ2	-1.1087	10.208745342405852	-3.661	5.038566021571059e-4	0.00225948947826972	-1.14281	Down	2.6459896767005775
PMS2P4	-0.58956	5.198519827670316	-3.66025	5.050736143312026e-4	0.00226358065079012	-1.1451	Down	2.645204027093573
ZNF230	-0.642543	6.596206658095641	-3.65852	5.07917472918892e-4	0.00227409860330945	-1.15042	Down	2.643190708537997
C5AR2	-0.541449	5.203923754401698	-3.65812	5.085616870734235e-4	0.00227609210456824	-1.15163	Down	2.642810167717915
AMIGO2	-1.5656	9.512451458847108	-3.658	5.087670043137605e-4	0.00227656567410415	-1.15201	Down	2.6427198166979244
IGFBP7-AS1	-0.79587	4.084598288363068	-3.65696	5.104868919427455e-4	0.002283368445896	-1.15521	Down	2.6414240048002458
ZC3H12C	-1.06491	7.659237394547343	-3.65564	5.126618041103311e-4	0.00229113083437971	-1.15924	Down	2.639950109838644
ZNF182	-0.609238	6.476554292714643	-3.65546	5.129610579623445e-4	0.00229174693323969	-1.15979	Down	2.639833341139859
MIB1	-0.934527	9.082710927827309	-3.65515	5.134736792725969e-4	0.00229358928310772	-1.16074	Down	2.6394843493160427
FAM184B	-0.802017	5.929072025612808	-3.655	5.137234466927299e-4	0.00229420760457241	-1.1612	Down	2.6393672850220655
FKBP7	-0.583589	7.312422838676731	-3.65381	5.157080984008093e-4	0.00230177245089975	-1.16486	Down	2.637937612158524
TPRG1	-1.26613	6.3273049023744194	-3.65322	5.16696107171975e-4	0.00230483334684882	-1.16667	Down	2.637360471211649
TICAM2	-1.07087	6.677128355295134	-3.65243	5.180017481194415e-4	0.00230761076976883	-1.16907	Down	2.6368374428287074
B4GALT6	-1.2249	7.872334485401223	-3.65242	5.180330571108348e-4	0.00230761076976883	-1.16912	Down	2.6368374428287074
STMN3	-1.13523	8.53543186920684	-3.65017	5.218122019322725e-4	0.00232267341790047	-1.17602	Down	2.6340118503695997
GAPT	-0.800488	4.990884899399597	-3.64773	5.259323284500462e-4	0.00233828327683805	-1.18347	Down	2.631102876358437
HSPB3	-0.665837	6.534344728658561	-3.64716	5.269080281191595e-4	0.00234171110632056	-1.18523	Down	2.630466684272083
ZNF514	-0.548244	6.905991649067019	-3.64262	5.346766349257875e-4	0.00237120961998073	-1.19911	Down	2.625030051767537
APBB3	-0.557699	7.540284734599403	-3.64049	5.383605120032407e-4	0.00238427219398415	-1.20561	Down	2.622644166046998
PTPRJ	-0.739308	8.361108139947987	-3.6396	5.399107820233016e-4	0.00238989525274745	-1.20834	Down	2.621621133424533
SESN2	-0.791375	8.288772347591866	-3.63809	5.425508893904311e-4	0.00240037562631899	-1.21296	Down	2.619720791758011
RP11-355B11.2	-0.648887	6.314822795377079	-3.63802	5.42674944609323e-4	0.00240037562631899	-1.21318	Down	2.619720791758011
PTPRCAP	-0.659098	7.073772452197837	-3.63751	5.435535994233003e-4	0.00240269976510946	-1.21471	Down	2.6193004940743814
DFNB59	-0.59298	7.062765693064143	-3.635	5.479705722950328e-4	0.00241793996596683	-1.22238	Down	2.61655448625978
UGP2	-1.16944	10.080162126747084	-3.63363	5.503939454613018e-4	0.00242676104802642	-1.22657	Down	2.614972984538501
LCN15	-0.619538	6.256794102005309	-3.63004	5.568070965194873e-4	0.00244966071980248	-1.23754	Down	2.610894061644044
SLC35F6	-0.599129	8.562595643807404	-3.62882	5.58993025336779e-4	0.00245757137330518	-1.24126	Down	2.6094938604409013
AF070581	-1.90738	5.73009	-3.62842	5.597076708439992e-4	0.00245976792186704	-1.24247	Down	2.609105866476753
WDR59	-0.761458	8.436899505661899	-3.62717	5.619666430456114e-4	0.00246874418516715	-1.24628	Down	2.6075239099571785
FAM71C	-0.79135	5.909681957707791	-3.62627	5.636031405994932e-4	0.00247403611929696	-1.24904	Down	2.6065939642473777
RP11-173M1.8	-0.517136	5.96693212311222	-3.62585	5.643588378186786e-4	0.00247687816045531	-1.25031	Down	2.6060953561688507
CTSC	-1.16336	9.51952687717722	-3.62539	5.651909639229252e-4	0.00247941101049518	-1.2517	Down	2.6056514745252977
OGT	-0.873757	10.381343607063975	-3.62411	5.675355833671745e-4	0.00248843361668409	-1.25563	Down	2.6040739403297755
ZBTB7A	-0.726728	8.319847063533299	-3.624	5.677249098136099e-4	0.002488786781304	-1.25594	Down	2.604012308561992
PCGEM1	-0.9448	6.340101709375801	-3.62161	5.721161132742511e-4	0.00250371931055883	-1.26324	Down	2.6014143610479983
LINC00086	-0.993719	8.239839956559335	-3.6193	5.763790581698922e-4	0.0025194834680682	-1.27028	Down	2.59868848698089
KDM3B	-0.58395	8.833452456732676	-3.61815	5.785104812317137e-4	0.00252686928218793	-1.27377	Down	2.5974172240447992
STMN2	-0.805285	5.812132673274355	-3.61796	5.78865744244399e-4	0.00252793841621828	-1.27435	Down	2.597233510224443
ZSWIM2	-1.10334	5.380386382865915	-3.6164	5.8178179109009e-4	0.00253921892376004	-1.27911	Down	2.595299853958029
CNTF	-0.78706	5.710045679551221	-3.61618	5.821809846710233e-4	0.00253999213354087	-1.27976	Down	2.595167628405685
VAT1L	-0.501326	6.425359017684006	-3.61434	5.856369716660637e-4	0.00255117827013478	-1.28537	Down	2.5932591928873725
MS4A6E	-0.635675	5.474310025367557	-3.61388	5.865047122714438e-4	0.00255398578455621	-1.28677	Down	2.592781524341976
GREB1	-1.89434	8.097532299739203	-3.61273	5.886666961406197e-4	0.00256096317569903	-1.29026	Down	2.59159666624289
FKBP11	-1.21766	9.244854150362746	-3.6109	5.921442567775605e-4	0.00257462342280764	-1.29583	Down	2.5892862840428097
SYNJ1	-0.964954	7.069886310845024	-3.60971	5.944031002191975e-4	0.00258248168057634	-1.29944	Down	2.5879627505645186
RGS16	-0.88572	7.216117831556945	-3.60722	5.991815064342123e-4	0.00260077284873996	-1.30702	Down	2.584897577387646
AMPD3	-0.593778	7.2543459381616	-3.60695	5.997054840066162e-4	0.00260255344624191	-1.30785	Down	2.5846003430202686
FRMD6	-1.34129	8.115443643632975	-3.60204	6.092142258962228e-4	0.0026393130608369	-1.32274	Down	2.5785090930955255
FAM114A2	-0.562458	7.053507691228655	-3.59767	6.178053208450775e-4	0.00266945570077705	-1.336	Down	2.5735772817990346
DDA1	-1.19131	8.07214460051212	-3.59736	6.184253090500842e-4	0.00267112566466997	-1.33695	Down	2.5733056798599634
ZNF204P	-1.02018	5.949757789355431	-3.59695	6.192479514660549e-4	0.00267316488331922	-1.33821	Down	2.5729742527259813
SEMG2	-0.796214	2.989573827846007	-3.59433	6.24458502516708e-4	0.00269058118250089	-1.34614	Down	2.570153899517783
TMX3	-0.855262	8.923725397634945	-3.59406	6.250073175708278e-4	0.00269193193123173	-1.34697	Down	2.5699359259726524
RCHY1	-0.722849	9.283371627745115	-3.59347	6.261862776127335e-4	0.00269581973633905	-1.34876	Down	2.5693091515026816
COBLL1	-0.993663	8.848448014684726	-3.58958	6.340311040516901e-4	0.00272566659706851	-1.36054	Down	2.564527268056989
LHFP	-1.26752	7.797135300514102	-3.58821	6.368093207037296e-4	0.00273617610842931	-1.36468	Down	2.562855953568267
AMPD1	-0.777799	5.648668156163889	-3.58625	6.408072028117297e-4	0.00274859917381506	-1.3706	Down	2.5608885883822268
TRIM34	-0.625095	7.472440653525391	-3.58475	6.439035085893965e-4	0.00275985708954235	-1.37516	Down	2.5591134059166887
LOC101927263	-0.728672	5.699486826628121	-3.58474	6.439143819212848e-4	0.00275985708954235	-1.37518	Down	2.5591134059166887
SLC37A2	-0.582579	5.876570629333696	-3.58293	6.476467978266438e-4	0.00277386976654678	-1.38065	Down	2.556913932951924
SYT1	-0.780033	7.599479648918622	-3.58243	6.486887091947453e-4	0.00277719853624	-1.38217	Down	2.5563930723161965
ADRA1B	-0.554808	5.082822465279366	-3.58024	6.532409184311787e-4	0.00279250728191086	-1.38879	Down	2.5540056857183226
TRAK2	-0.8499	9.079618237573063	-3.57393	6.665503784245597e-4	0.00284244924755281	-1.40787	Down	2.5463072809777945
PAQR7	-0.5504	8.235068204363282	-3.56973	6.755313176737205e-4	0.00287490346299424	-1.42053	Down	2.5413767339979354
C15orf39	-0.674944	8.424772112524463	-3.5696	6.758245501807584e-4	0.00287561649313475	-1.42094	Down	2.541269034151868
SND1-IT1	-0.616002	7.33430783326924	-3.56903	6.770479225784207e-4	0.00287921550570105	-1.42265	Down	2.5407258275032865
AASDH	-0.56156	7.69335758639966	-3.56865	6.778640979898364e-4	0.00288215065934017	-1.42379	Down	2.540283320950926
SDC2	-0.960789	9.877432898855512	-3.56586	6.839260185900029e-4	0.00290253076967551	-1.43221	Down	2.5372231676171397
PLIN2	-1.18507	9.805516058765743	-3.56489	6.860439291228082e-4	0.00291021930305163	-1.43513	Down	2.5360742830015304
ZNF200	-0.830196	7.955410329327836	-3.56486	6.861192762210104e-4	0.00291021930305163	-1.43523	Down	2.5360742830015304
EFHC1	-0.985378	8.715006476404648	-3.56246	6.913866185405023e-4	0.00293038800399928	-1.44247	Down	2.5330748721921266
SPTBN1	-1.16902	9.724690909792576	-3.56015	6.96478193568078e-4	0.00294596498255575	-1.4494	Down	2.530772419738192
SULF1	-1.55337	9.56238349329633	-3.55849	7.001834104884327e-4	0.00295890215156351	-1.45442	Down	2.528869396359698
FOXR2	-0.538811	4.775875042199752	-3.55632	7.050237259628119e-4	0.00297660782917571	-1.46093	Down	2.5262783802824695
FMOD	-1.1092	8.914514623215705	-3.55452	7.090741269168494e-4	0.00299260412280586	-1.46635	Down	2.523950730086685
CDC42EP3	-1.05078	8.403579804089421	-3.55411	7.10019531685247e-4	0.00299493673772617	-1.46761	Down	2.523612346812769
ZDHHC17	-0.746636	8.976471454733032	-3.5526	7.134283956456501e-4	0.00300433062101542	-1.47214	Down	2.522252275735255
COLCA1	-0.573214	9.587389269036915	-3.55249	7.136884394692531e-4	0.00300487261807453	-1.47248	Down	2.52217393379099
FRMD4B	-1.03872	9.729939223489795	-3.55124	7.165231616804895e-4	0.0030140344578209	-1.47623	Down	2.52085178693979
FAM175A	-0.996362	7.393008092827829	-3.55025	7.187809126566732e-4	0.00302242023537438	-1.4792	Down	2.5196451517720253
MYO1D	-0.852405	6.043351036279904	-3.54615	7.282205772542606e-4	0.00305481455573894	-1.49154	Down	2.5150151487156216
LTA	-0.582538	6.368425486231119	-3.54291	7.357520215188036e-4	0.00308132354023955	-1.50126	Down	2.5112626981895323
JAK2	-0.581664	6.198829974700853	-3.53798	7.473510734347529e-4	0.00312132990308757	-1.51604	Down	2.5056603269711197
SAP30L	-0.975923	8.874417138114689	-3.53689	7.499578459527496e-4	0.00312993169601476	-1.51933	Down	2.5044651398872757
PSD3	-0.617224	8.744574443130967	-3.53539	7.535219465632557e-4	0.0031419406990014	-1.52381	Down	2.502802016094105
ZNF112	-1.0439	7.38369239585023	-3.5322	7.611812747678624e-4	0.00316918491316954	-1.53336	Down	2.499052420189227
LONRF2	-1.75554	9.06416306733523	-3.53215	7.61302516839888e-4	0.00316918491316954	-1.53351	Down	2.499052420189227
LOC643733	-0.572427	6.505035305705263	-3.53003	7.664392352582717e-4	0.00318766829003344	-1.53987	Down	2.496526877772559
MGAT5B	-1.23613	7.560034708275438	-3.52993	7.666900406578348e-4	0.00318813185027455	-1.54018	Down	2.496463725963949
ZNF596	-0.588121	5.947042642391018	-3.52915	7.685792304470853e-4	0.00319308592943505	-1.5425	Down	2.495789393963741
MAGEH1	-1.25118	8.296311438553145	-3.52864	7.698358326750744e-4	0.00319714540130205	-1.54404	Down	2.4952376122277786
ADCY9	-1.01631	7.61944817191029	-3.52487	7.790903921847748e-4	0.00322913208021656	-1.55533	Down	2.4909141908031915
MPHOSPH8	-0.890522	9.10943328716063	-3.51867	7.945360774280893e-4	0.00328203842266472	-1.57387	Down	2.483856338988717
ERCC3	-0.65248	7.869511863069117	-3.51799	7.962457092470451e-4	0.00328772885433372	-1.5759	Down	2.4831040068018035
LRRTM4	-0.815633	4.565400751943937	-3.51782	7.966751016788714e-4	0.0032889082734231098	-1.57641	Down	2.4829482386796116
OSBPL1A	-0.852714	8.959840082847084	-3.51639	8.002818326728546e-4	0.0033020104688408	-1.58067	Down	2.481221554164508
OGG1	-0.582786	7.316685074795263	-3.51526	8.031520052707657e-4	0.0033102505847259	-1.58405	Down	2.480139129050716
CNTN6	-0.794602	4.331443672952734	-3.51465	8.047002986064125e-4	0.00331387095342823	-1.58587	Down	2.4796644075959917
AKAP17A	-0.862668	9.162227598841945	-3.51463	8.047496401611653e-4	0.00331387095342823	-1.58593	Down	2.4796644075959917
COG4	-0.731586	7.890169267022701	-3.51383	8.067860528672187e-4	0.00332106119171448	-1.58832	Down	2.4787231223001074
TRIM61	-0.949137	7.304672230521292	-3.51076	8.146434197913034e-4	0.00334738268703398	-1.59747	Down	2.4752946344105196
TSPAN5	-1.0519	8.159897774794475	-3.50711	8.240981338931237e-4	0.00338258722736648	-1.60836	Down	2.4707509953584283
PLXNB2	-0.909294	9.226169002597052	-3.49964	8.437529726914481e-4	0.00344718290396565	-1.6306	Down	2.4625356727639076
CNOT1	-0.764781	9.4823760106381485	-3.49948	8.441991250102382e-4	0.00344838989128892	-1.6311	Down	2.462383636680716
PDE6A	-1.10786	6.503315497923447	-3.49852	8.467387786817347e-4	0.00345691229790496	-1.63394	Down	2.461311638397737
RP1-151F17.2	-0.628308	5.8794880344554405	-3.49807	8.479639561727287e-4	0.00345944496313763	-1.6353	Down	2.4609935742657942
CAND2	-1.05628	7.874966842231387	-3.49767	8.490286935447591e-4	0.00346317123901061	-1.63649	Down	2.4605260339143653
PLCXD1	-0.98834	7.613216052947902	-3.49702	8.507500750018429e-4	0.00346957414723122	-1.6384	Down	2.4597238268970663
TXLNG	-0.918389	8.523921902046482	-3.49621	8.529302508578384e-4	0.00347598703408914	-1.64081	Down	2.458921852198642
HAUS1	-0.926237	6.467213277620059	-3.49606	8.53355353328115e-4	0.00347626070231537	-1.64128	Down	2.4588876610693577
WDR16	-1.07156	6.310248367554799	-3.48974	8.705037826994424e-4	0.00353438439119441	-1.66005	Down	2.451686219431305
DEF8	-0.706142	9.039787300929634	-3.48803	8.751967326080487e-4	0.00354840085864603	-1.66513	Down	2.449967324335178
ZBTB8A	-0.845631	8.149353352214206	-3.47864	9.014440314789788e-4	0.00363037106076528	-1.693	Down	2.4400489833917205
SLC22A1	-0.512998	5.770275055655647	-3.4776	9.043978772793536e-4	0.00364098522510545	-1.69608	Down	2.43878108340283
MBIP	-0.96023	8.063518802556223	-3.47648	9.075953498789886e-4	0.00364936274338864	-1.69941	Down	2.4377829660071706
TXNIP	-1.20947	11.060924151640153	-3.47589	9.09282573977288e-4	0.00365357850544895	-1.70116	Down	2.4372815564132004
FUT7	-1.10531	5.802600654190755	-3.47562	9.100528818517088e-4	0.00365538972680569	-1.70196	Down	2.4370663130486534
PLA2G4A	-1.61721	6.963108770415701	-3.47489	9.121296517962392e-4	0.00366308834534775	-1.70411	Down	2.4361526070154023
NAP1L5	-1.04777	8.004600837974856	-3.47152	9.218476905153692e-4	0.00369692433151641	-1.7141	Down	2.432159438456157
NOX3	-0.594047	5.243253012169421	-3.47081	9.239155532166272e-4	0.00370326978662284	-1.71621	Down	2.431414648044095
SETDB2	-0.576777	7.71408614846135	-3.46877	9.298379832611533e-4	0.00372244325792334	-1.72224	Down	2.429171913578097
SETD7	-1.04918	9.19769483171232	-3.46783	9.32598675347415e-4	0.00373088391209538	-1.72503	Down	2.4281882639907297
ZNF30	-0.618584	7.299816542887482	-3.46759	9.33286248270252e-4	0.00373298183114949	-1.72573	Down	2.427944123829581
ZNF223	-1.01641	6.747263834634452	-3.4668	9.355970479231782e-4	0.00373895630732478	-1.72806	Down	2.427249609892215
LOC101928102	-1.06806	7.072546390724072	-3.46635	9.369376819663282e-4	0.00374300632542476	-1.72941	Down	2.4267794389569786
HP	-1.8284	9.3472661558477	-3.46538	9.39769845398063e-4	0.00375301000049961	-1.73225	Down	2.4256202783377807
CLK4	-0.789235	8.45089447941591	-3.4639	9.441430603073076e-4	0.0037678438996635	-1.73663	Down	2.4239070981612927
RP11-1109F11.3	-0.50414	6.923399551519388	-3.46098	9.52848989068737e-4	0.00379464439006155	-1.74528	Down	2.4208289171783277
SLC4A1	-0.88579	8.508723030625001	-3.45972	9.566259753483934e-4	0.00380637316347754	-1.74901	Down	2.419488637253715
ERICH3	-1.40106	5.1300859373419945	-3.45894	9.58965454733804e-4	0.00381501836878015	-1.75131	Down	2.4185033666368456
LOC284600	-0.624834	5.6226408556292755	-3.45199	9.800488541481607e-4	0.0038847085471337	-1.7718	Down	2.4106415588758567
DENND4C	-0.618249	9.526780215611266	-3.45119	9.825204001689064e-4	0.00389261136170539	-1.77417	Down	2.4097589540758775
ISOC1	-1.00673	9.157636775151904	-3.44942	9.87955944932202e-4	0.00390792601384921	-1.77937	Down	2.4080536670825348
TTC31	-0.603421	7.686673860042823	-3.44911	9.889215406157338e-4	0.00390926132327953	-1.78029	Down	2.4079052972155095
CYP4F12	-0.504936	6.385496412595358	-3.44843	9.910200630502551e-4	0.00391395615786756	-1.78229	Down	2.4073840433951443
OR7E47P	-0.905104	7.819543488258042	-3.44749	9.939651362920927e-4	0.00392242619366909	-1.78508	Down	2.406445219566089
C9orf131	-1.06129	6.943788766853258	-3.44648	9.970941951072294e-4	0.00393183696826237	-1.78804	Down	2.4054044982793554
TRPV4	-0.552976	6.193370608921384	-3.44558	9.998973323387342e-4	0.00393881733239977	-1.79069	Down	2.404634159675835
GABRB1	-0.623712	6.033460972357789	-3.44211	0.00101081790330002	0.0039729432760009	-1.80092	Down	2.400887635572793
DSCR3	-0.727121	7.612628000791367	-3.44127	0.00101345641016631	0.00398228978177891	-1.80337	Down	2.3998671405797043
CPEB2-AS1	-0.60614	5.710136420604905	-3.43943	0.00101931926769874	0.00400085872802873	-1.80881	Down	2.3978467834674833
DPY19L2	-0.876323	6.171975086614088	-3.43607	0.00103006263836309	0.00403472061344107	-1.81868	Down	2.3941865328729532
C1R	-1.18812	9.863545078489407	-3.43446	0.00103526173254207	0.00404815470497866	-1.82342	Down	2.392742898778259
BBIP1	-0.922378	9.447348596537218	-3.43387	0.00103714963602885	0.00405484390340126	-1.82514	Down	2.3920258598736215
CYB5D1	-0.822921	8.329622707992696	-3.4329	0.00104031900610863	0.00406376276946549	-1.82801	Down	2.39107165282041
MAP3K3	-0.89475	8.418467869685273	-3.4308	0.00104714568824108	0.0040841538017845	-1.83417	Down	2.3888979115389457
GFRA1	-0.912424	7.3996774729955295	-3.43073	0.00104738203590105	0.00408437934197718	-1.83438	Down	2.3888739290541032
GCOM1	-0.641402	10.12825083931218	-3.43063	0.0010477155037278	0.0040849834713341	-1.83468	Down	2.3888096963709575
STOML3	-0.685638	4.88760494467694	-3.43047	0.00104823639388613	0.00408631801937652	-1.83515	Down	2.388667837242037
DPY19L3	-0.990311	8.579057996359237	-3.42865	0.00105418299675573	0.00410460394533263	-1.84047	Down	2.386728741749092
ZNF804B	-0.622919	4.302140179570763	-3.42822	0.00105560127527166	0.00410733020015993	-1.84174	Down	2.3864403815527533
KLRC1	-0.935273	5.721011994720581	-3.42775	0.00105715494188795	0.0041112779050577	-1.84312	Down	2.386023165750956
MIR100HG	-1.30293	7.261704432293673	-3.42688	0.00106003114874522	0.00411966241755425	-1.84568	Down	2.38513837042321
USP3	-0.712268	9.058217360536707	-3.42403	0.00106946614711498	0.00414857849776936	-1.85402	Down	2.3821006879456617
ZFP90	-0.683576	7.997192723672571	-3.41941	0.00108499180552291	0.00419741757161966	-1.86759	Down	2.377017823728861
RNFT1	-0.955635	6.705595232782346	-3.41924	0.00108556933817847	0.00419823206358779	-1.86809	Down	2.3769335588098155
CPXM1	-1.30335	8.280823006716487	-3.41803	0.00108966082427908	0.00420907479295648	-1.87163	Down	2.375813357008051
PNMA2	-1.36164	6.68630581783919	-3.4166	0.00109451779383856	0.00422445146659507	-1.87581	Down	2.374229674997523
USP12	-0.761551	8.238826728782083	-3.41591	0.00109684835883657	0.00423112352079279	-1.87781	Down	2.3735442959602038
GNE	-0.926719	7.596653778105693	-3.41586	0.00109703453434453	0.0042311283060129	-1.87797	Down	2.373543804791959
GMFG	-0.753064	7.458493722104848	-3.41551	0.00109822363320586	0.00423500059061467	-1.87899	Down	2.373146524766409
ARHGAP28	-0.815236	7.950639688060053	-3.41335	0.00110562269430012	0.00425850869072266	-1.88531	Down	2.370742462113649
UBE2Q2L	-0.547634	5.407220924404115	-3.41322	0.001106087558403	0.00425958209875482	-1.88571	Down	2.3706330067910453
FAM131C	-0.553394	6.181576688659122	-3.41076	0.00111458581994274	0.00428725772939982	-1.89291	Down	2.3678204080005085
YAF2	-0.630279	5.813320646576731	-3.40876	0.00112152535129004	0.00430887968298319	-1.89875	Down	2.3656356325642207
ZNF404	-1.17983	6.628849461818769	-3.40691	0.00112799576464676	0.00432792471899265	-1.90416	Down	2.363720302062861
LOC100506016	-1.01091	4.707943321527313	-3.40605	0.00113100049101625	0.0043365443663417	-1.90666	Down	2.3628562060685834
LRRN4CL	-0.81257	7.562477835497472	-3.40271	0.00114279147406482	0.00437515497575788	-1.91642	Down	2.359006558887513
BC065766	-0.593521	6.268786054655762	-3.39998	0.00115250993958157	0.00440363669505081	-1.92438	Down	2.356188518002527
NAV3	-0.660099	8.002133948715013	-3.39966	0.00115366000472299	0.00440676836800806	-1.92532	Down	2.3558797766150414
RP11-334C17.5	-0.800163	5.711149588296529	-3.39719	0.0011625587369182	0.00443376918518947	-1.93254	Down	2.353226919297245
SMYD3	-0.960715	9.143187666296413	-3.39627	0.00116587516164759	0.00444567630388921	-1.93522	Down	2.352062162094181
LOC102724356	-0.755089	7.912766380151353	-3.39603	0.00116673144227659	0.00444820007796136	-1.93591	Down	2.351815686623764
PTPRO	-0.931012	10.999549199185282	-3.39593	0.00116709378424777	0.00444852199165169	-1.9362	Down	2.351784258118225
LINC00597	-0.737581	5.990256345948572	-3.39348	0.00117597465968177	0.00447896191757271	-1.94333	Down	2.3488226301336423
PALMD	-1.02365	8.360985888730733	-3.39211	0.00118100116587308	0.00449660936495429	-1.94734	Down	2.3471148393641523
RABL2A	-0.724532	7.25893301620945	-3.3885	0.00119428545734461	0.00453602144673062	-1.95786	Down	2.3433249007256562
RAB22A	-0.729636	8.799799050929401	-3.38758	0.00119768095537055	0.00454725233619697	-1.96053	Down	2.342250945250085
SNX30	-0.68508	7.750941468289448	-3.38617	0.00120292736162882	0.00456565612254576	-1.96464	Down	2.3404968019357653
FAM171B	-1.34358	6.862911801372739	-3.38565	0.00120484756461569	0.00457075652928255	-1.96613	Down	2.3400119116805267
LOC100288675	-0.723419	6.00950935995975	-3.38348	0.00121299012565475	0.00459622409487499	-1.97247	Down	2.3375988048760425
ITPKA	-0.846429	5.96401545926838	-3.38142	0.00122073392164495	0.00462250436830767	-1.97845	Down	2.335122669756454
ACTR1B	-0.673767	7.962277698227432	-3.38079	0.0012231140944737	0.0046299846736373	-1.98028	Down	2.334420446598843
GPR65	-1.05477	6.534037945983897	-3.38058	0.00122391545285663	0.00463117637452019	-1.98089	Down	2.334308678945158
TENC1	-0.62378	6.903333337967777	-3.3803	0.0012249650449879	0.0046339244815275	-1.9817	Down	2.334051048129801
MOCS2	-0.645515	6.782584119065808	-3.38022	0.00122528622502594	0.00463437320918639	-1.98194	Down	2.334008995111482
CAMK1D	-1.05542	7.900237022989348	-3.37593	0.00124162699198311	0.0046885712839735	-1.99439	Down	2.3289594766910455
TWIST1	-1.42693	6.894786353310322	-3.37565	0.00124270738452816	0.00469173304465675	-1.99521	Down	2.3286667068145617
CROCCP2	-0.735845	8.722077708263301	-3.37402	0.00124899749925747	0.00471237034721498	-1.99995	Down	2.3267605854893216
CISD2	-0.632977	8.747221864930202	-3.37243	0.00125512265998877	0.00473235849338878	-2.00455	Down	2.3249223634094305
KAT2B	-0.944697	8.474106236981745	-3.37106	0.00126045151968578	0.00474775606172063	-2.00853	Down	2.3235116030641647
EPB41L3	-1.21638	7.004757659896566	-3.36957	0.00126628441641286	0.00476423633664035	-2.01287	Down	2.3220067028666445
BC042811	-0.940367	6.005031076495684	-3.36748	0.00127444682161856	0.00479021994936934	-2.0189	Down	2.3196445449143845
LOC101927027	-0.774682	6.352308659994054	-3.36664	0.00127775146726241	0.00480106352759021	-2.02134	Down	2.318662547415683
VNN1	-1.04239	5.846613038960534	-3.36606	0.00128006590720713	0.00480607362708112	-2.02304	Down	2.3182095802674247
TRIM71	-1.37904	5.681943893750471	-3.36442	0.00128656359792957	0.0048215050871467	-2.02779	Down	2.316817370680298
GTF2H1	-0.759145	9.122880381683288	-3.36279	0.00129304310498722	0.00484102981492435	-2.03251	Down	2.3150622426189225
GJA1	-1.73031	9.883515122115242	-3.36174	0.00129721313696887	0.00485346514484232	-2.03553	Down	2.31394808491428
ZDHHC2	-1.03177	8.45523919461882	-3.35768	0.00131356096153579	0.00490308914136619	-2.04729	Down	2.3095302109244265
PDLIM3	-0.963904	7.912421394264599	-3.35749	0.0013143176428924	0.00490382800908926	-2.04784	Down	2.3094647701399946
WSB1	-0.719137	10.225826595763667	-3.35499	0.00132449809963442	0.00493398706151255	-2.05508	Down	2.306801993703411
TPM1	-1.03218	10.335702350438725	-3.35442	0.00132680458931775	0.00493833775809352	-2.05671	Down	2.306419209774722
SRL	-0.702638	6.599945850303908	-3.35365	0.00132997217671312	0.00494610426381982	-2.05895	Down	2.305736732955647
KDELC1	-1.06971	6.799185980430662	-3.34738	0.00135588509288353	0.00502694782694579	-2.07707	Down	2.298695622149512
RP11-5C23.1	-0.737227	7.237907533119141	-3.33998	0.00138705426739445	0.00512672287297538	-2.0984	Down	2.2901601578844364
TIMD4	-0.887782	6.18763381175525	-3.33781	0.00139634984324049	0.00515617740886193	-2.10466	Down	2.2876721482689315
ING3	-0.578434	8.47028325505238	-3.33626	0.00140298168796066	0.00517806388753863	-2.10911	Down	2.2858325954935914
PDP2	-0.685621	6.731195886781465	-3.33336	0.00141553453984362	0.00521309408387969	-2.11747	Down	2.2829044370255858
C10orf32	-1.10354	9.427157637069945	-3.33222	0.00142050195884157	0.00522670703061055	-2.12075	Down	2.281771842461088
RNASE6	-0.818949	7.781529923010782	-3.33099	0.0014258573361862	0.00524303921481904	-2.12428	Down	2.280416894009369
MET	-1.37718	9.77472909028571	-3.33008	0.00142985096403476	0.00525519039456245	-2.12691	Down	2.2794115449430716
DAK	-1.0136	7.041659324989633	-3.32618	0.001447049751522	0.00530451945022378	-2.13812	Down	2.275353953811489
LHX4-AS1	-0.555148	5.763298204615283	-3.32526	0.00145111457283534	0.00531513907197508	-2.14075	Down	2.274485367565672
PLA2G12A	-0.670662	9.885210637675044	-3.32509	0.0014518696307628	0.00531513907197508	-2.14124	Down	2.274485367565672
TTN-AS1	-0.577146	6.527590842679825	-3.3243	0.00145538876329384	0.00532595001845806	-2.14351	Down	2.2736029135278915
HSD17B8	-0.585294	9.199845556857678	-3.32305	0.00146096458849807	0.00534122863858221	-2.1471	Down	2.27235883106488
LOC286189	-1.63496	5.995315547342974	-3.32287	0.00146175890099434	0.00534327878189001	-2.14761	Down	2.2721921662105116
PPP3CB	-0.667788	9.761829213974076	-3.32215	0.00146498884302662	0.0053525199200904	-2.14968	Down	2.271441707747818
PSCA	-0.829704	5.394056723695357	-3.31891	0.00147960956598443	0.00539645899253272	-2.15899	Down	2.26789111877651
SDF2	-0.656987	8.319019399058686	-3.31834	0.00148219948654361	0.00540504336191129	-2.16063	Down	2.2672008175731575
LYSMD3	-0.790084	8.495805223831267	-3.31582	0.00149367928601017	0.00543737285356036	-2.16786	Down	2.264610885373902
TMEM119	-0.517344	5.956023684891752	-3.31569	0.00149427291724701	0.0054386684813386	-2.16823	Down	2.2645074131674208
APBB1IP	-0.899631	7.883316417322094	-3.31261	0.00150838289280208	0.00548304610810595	-2.17704	Down	2.260978102026096
DPYSL2	-1.25536	10.023014443578663	-3.31226	0.00150998322537701	0.00548711979247151	-2.17804	Down	2.2606555583675347
SURF1	-0.689544	9.02699799364176	-3.31092	0.00151618536248928	0.00550703364159269	-2.18188	Down	2.259082270474693
L3MBTL4	-0.693892	7.060127958303541	-3.31026	0.0015192670591531	0.00551475964963232	-2.18378	Down	2.258473410714822
LOC101928834	-0.696835	4.008227841815088	-3.30937	0.00152342054505678	0.00552629437931731	-2.18634	Down	2.2575659844379845
ZFP3	-0.602483	7.603845233732241	-3.30767	0.0015313345878947	0.00555236197091012	-2.1912	Down	2.2555222290005017
CD44	-1.13693	9.129070509338506	-3.3045	0.00154621143526252	0.00559389175005869	-2.20026	Down	2.252285942113053
TUBE1	-0.801536	7.782659172066186	-3.30429	0.00154723178963488	0.00559669820000892	-2.20088	Down	2.252068111639751
ZNF814	-0.54351	6.689086012430054	-3.30163	0.00155980208253641	0.00563949302249535	-2.20846	Down	2.248759936340975
LOC100507389	-0.698153	5.367470590403769	-3.30135	0.00156113062914374	0.00564162180764171	-2.20926	Down	2.2485960306158557
TRIM22	-1.28929	8.64434224926267	-3.29496	0.00159187578035364	0.0057355159021592	-2.22753	Down	2.241427511784687
RP11-7F17.4	-0.910822	2.766728120290584	-3.29127	0.0016098573392327	0.00579118334344419	-2.23805	Down	2.237232685492172
CCL23	-0.775269	4.668712287532494	-3.28811	0.00162543309193302	0.00583228676006029	-2.24707	Down	2.234161130909195
ARNT2	-1.13196	7.918521068087532	-3.28602	0.00163579148409628	0.00586235485035071	-2.25302	Down	2.2319278971079264
PCDHGA4	-0.942845	6.574795716289875	-3.28518	0.00163998327850515	0.0058736971554351	-2.25541	Down	2.2310884492183933
WDPCP	-0.946921	8.36121093824272	-3.28129	0.00165947138114212	0.00593327796986259	-2.26647	Down	2.2267053047976257
[truncated: 522 more rows]
