# Supplementary material for: Identification of heme metabolism-related biomarkers in ovarian cancer and construction of a prognostic model via bulk RNA-Seq analysis
Source: Research Square preprint supplement (doi:10.21203/rs.3.rs-8411969/v1), 2026-01-08
Supplement: Supplementary file 6 [file 766155677d572abbef7a33db.xlsx]

## Sheet: Online Resource 4
gene
ALAS1
FECH
ALAD
HMBS
ABCC2
BLVRB
SLCO1B1
FABP1
UGT1A1
AMBP
APOA1
APOL1
CD163
HBA1
HBB
HP
HPX
IGHA1
LRP1
ABCB6
ADD2
ADIPOR1
AGPAT4
ARHGEF12
ATP6V0A1
BACH1
BMP2K
BTG2
BTRC
C3
CA1
CA2
CCDC28A
CDR2
CLIC2
CROCCP2
CTNS
CTSB
DAAM1
DCAF10
DCAF11
DCUN1D1
E2F2
ELL2
EPB42
EPOR
ERMAP
EZH1
FBXO9
FOXJ2
FOXO3
FTCD
GAPVD1
GCLC
GCLM
GDE1
GLRX5
GMPS
GYPC
HBD
HBQ1
HBZ
HDGF
HTRA2
IGSF3
ISCA1
KAT2B
KLF3
MARK3
MGST3
NR3C1
OPTN
PGLS
RAD23A
RANBP10
RAP1GAP
RBM38
RCL1
RHAG
RHCE
RHD
RNF123
SEC14L1
SELENBP1
SLC25A37
SLC2A1
SLC4A1
SLC6A8
SLC7A11
SMOX
SNCA
SYNJ1
TFDP2
TMCC2
TRAK2
TRIM10
TSPAN5
TSPO2
TYR
UCP2
XK
