# Supplementary material for: Identification of heme metabolism-related biomarkers in ovarian cancer and construction of a prognostic model via bulk RNA-Seq analysis
Source: Research Square preprint supplement (doi:10.21203/rs.3.rs-8411969/v1), 2026-01-08
Supplement: Supplementary file 7 [file 9004f4afe6d65e09ecbc3bea.xlsx]

## Sheet: Online Resource 9
ID	Description	setSize	enrichmentScore	NES	pvalue	p.adjust	qvalue	rank	leading_edge	core_enrichment
Stem cell up	Stem cell up	258	0.6824763375357166	2.8145453253859345	1e-10	5.2040404040404045e-9	3.779904306220096e-9	3309	tags=62%, list=18%, signal=52%	ATP1A2/HAS1/ADH1B/PLA2G2A/PTGFR/RERGL/PLP1/OMD/NTRK2/MYH11/PTGIS/ABI3BP/CES1/MFAP4/FGF7/EFEMP1/DPT/GSTM5/COL16A1/LRP1/SVEP1/CCN5/SFRP4/CXCL12/COL14A1/ITGBL1/SPOCK1/FBN1/CRISPLD2/ABCA6/THBS2/ASPA/OGN/FLRT2/ECM2/COL5A1/PTPRD/PRRX1/PDGFRA/CXCL14/CILP/AEBP1/CFD/DDR2/SLIT3/ABCA8/SLC22A3/DCLK1/CELF2/PLN/PTGDS/COL5A2/EFS/RHOBTB3/TGFB2/OLFML1/VCAN/NPY1R/MRC2/COL3A1/MXRA8/TNC/FXYD1/SERPINE2/ELOVL2/C7/COL1…
Core matrisome	Core matrisome	269	0.6816222525974616	2.8145231136138955	1e-10	5.2040404040404045e-9	3.779904306220096e-9	2434	tags=54%, list=13%, signal=48%	COL2A1/COL9A3/ADIPOQ/NCAN/EMILIN3/SLIT1/TNXB/PODN/HAPLN4/LTBP4/FBN2/COL11A2/OMD/COL26A1/BMPER/ABI3BP/ASPN/MFAP4/COMP/NELL1/FBLN2/TNR/COL4A3/DSPP/ZP2/EFEMP1/EMILIN1/DPT/COL4A4/COL16A1/SVEP1/CCN5/FN1/COL14A1/LAMA1/SPOCK1/FBN1/NTN3/CRISPLD2/ELN/THBS2/COL24A1/OGN/ZPLD1/ECM2/HSPG2/COL8A1/PRG4/COL5A1/VWA5B1/OTOG/PXDN/LGI4/KCP/CILP/AEBP1/SLIT3/TNN/THBS4/LAMB1/FBN3/SNED1/CCN2/BGN/COL8A2/VTN/COL11A1/FNDC1…
Multicancer invasiveness signature	Multicancer invasiveness signature	64	0.8012340306596202	2.7506622043844136	1e-10	5.2040404040404045e-9	3.779904306220096e-9	2661	tags=84%, list=14%, signal=73%	ASPN/COMP/SFRP4/FN1/ITGBL1/SPOCK1/FBN1/CRISPLD2/THBS2/COL5A1/PRRX1/AEBP1/LRRC15/NUAK1/BGN/TIMP3/COL11A1/COL5A2/VCAN/COL3A1/ACTA2/PDGFRB/COL1A1/PCOLCE/GLT8D2/COL10A1/ADAM12/EDNRA/COL6A3/GREM1/LOX/FAP/DCN/INHBA/MMP2/OLFML2B/C1QTNF3/CDH11/SERPINF1/NID2/NTM/CTSK/SNAI2/COL1A2/COL6A2/SPARC/EPYC/POSTN/LUM/MXRA5/RAB31/SULF1/LOXL2/TMEM158
Breast cancer ductal invasive up	Breast cancer ductal invasive up	349	0.6346188783677726	2.6945754189969873	1e-10	5.2040404040404045e-9	3.779904306220096e-9	4167	tags=61%, list=22%, signal=48%	FBN2/CPA3/ASPN/COMP/FBLN2/COL16A1/FN1/COL14A1/ITGBL1/SPOCK1/FBN1/CRISPLD2/PDE10A/RGS4/THBS2/FCGR3B/ECM2/COL5A1/PRRX1/PDGFRA/XYLT1/CILP/AEBP1/LRRC15/NUAK1/FXYD5/LAMB1/MMP3/CCN2/BGN/TIMP3/COL8A2/CELF2/COL11A1/PLN/COL5A2/OLFML1/VCAN/TNFSF4/MRC2/ZEB1/COL3A1/MXRA8/JCAD/GEM/C9/CCND2/CH25H/FSTL1/ACKR3/DACT1/SERPINE2/PDGFRB/CAVIN1/LHFPL6/COL1A1/MME/COL10A1/HEG1/ADAM12/EDNRA/COL6A3/GREM1/LOX/FAP/GRK5/DCN/…
Ecm glycoproteins	Ecm glycoproteins	191	0.652412375461194	2.629832602993684	1e-10	5.2040404040404045e-9	3.779904306220096e-9	1908	tags=47%, list=10%, signal=43%	ADIPOQ/EMILIN3/SLIT1/TNXB/LTBP4/FBN2/BMPER/ABI3BP/MFAP4/COMP/NELL1/FBLN2/TNR/DSPP/ZP2/EFEMP1/EMILIN1/DPT/SVEP1/CCN5/FN1/LAMA1/FBN1/NTN3/CRISPLD2/ELN/THBS2/ZPLD1/ECM2/VWA5B1/OTOG/PXDN/LGI4/KCP/CILP/AEBP1/SLIT3/TNN/THBS4/LAMB1/FBN3/SNED1/CCN2/VTN/FNDC1/CILP2/MEPE/HMCN1/TNC/VIT/CRISPLD1/PAPLN/PCOLCE/SMOC2/ANOS1/RSPO2/LGI2/IGSF10/NID1/IGFBP4/CCN4/IGFBP3/LAMA4/MATN3/SMOC1/NID2/NTNG1/THBS1/TGFBI/PCOLCE…
Ecm proteoglycans	Ecm proteoglycans	76	0.7424138090328528	2.627426429407247	1e-10	5.2040404040404045e-9	3.779904306220096e-9	2301	tags=62%, list=12%, signal=54%	COL2A1/COL9A3/NCAN/LRP4/TNXB/SERPINE1/ASPN/COMP/TNR/COL4A3/DSPP/COL4A4/FN1/LAMA1/HSPG2/COL5A1/TNN/LAMB1/BGN/VTN/COL5A2/TGFB2/VCAN/MUSK/COL3A1/TNC/COL1A1/COL9A2/COL6A3/TGFB3/DCN/LAMA4/MATN3/ACAN/LAMA2/COL1A2/COL6A2/SPARC/ITGA7/COL4A6/COL4A5/LUM/TGFB1/DMP1/ITGA8/AGRN/FMOD
Gastric cancer advanced vs early up	Gastric cancer advanced vs early up	172	0.6444338574121558	2.569620440468874	1e-10	5.2040404040404045e-9	3.779904306220096e-9	4164	tags=62%, list=22%, signal=48%	ZNF423/EFEMP1/SFRP4/FN1/ITGBL1/SPOCK1/FBN1/SFRP2/THBS2/COL8A1/BCAT1/PRRX1/DDR2/THBS4/GPC6/NUAK1/BGN/TIMP3/ISM1/COL11A1/FNDC1/COL5A2/VCAN/EPHA4/FSTL1/CRISPLD1/ADAMTS2/ANOS1/COL10A1/ADAM12/EDNRA/LOX/FAP/INHBA/ANTXR1/CYP1B1/AKT3/CD163/CCN4/CDH11/IGFBP3/GFPT2/NID2/LPL/THBS1/NTM/AXL/IL6/FRMD6/LAMA2/SNAI2/SLIT2/IGF2BP3/COL1A2/SPARC/CCDC88A/TWIST1/ADAMTS12/MOXD1/MGP/CTHRC1/CEP170/PDE3A/CDK14/GSDME/ARMCX…
Endmetrium cancer dn	Endmetrium cancer dn	75	0.7284045949981663	2.565863795813718	1e-10	5.2040404040404045e-9	3.779904306220096e-9	3207	tags=72%, list=17%, signal=60%	LTBP4/EFEMP1/EMILIN1/SFRP4/FBN1/CRISPLD2/LMOD1/OGN/FLRT2/ECM2/VGLL3/ADAMTS5/PDGFRA/XYLT1/HIC1/ADGRD1/EFS/COL3A1/KIF26A/JPH4/MME/GLT8D2/PEG3/DCN/DPP6/NID1/EHD2/CNRIP1/PAPPA/CD248/TRO/WNT4/PLEKHH2/TSHZ3/ALDH1A2/SRPX/LDB2/PID1/PARM1/MICU3/ATP8A2/PWWP3B/TRPC1/NDN/RORB/COX7A1/P2RY14/RIPOR3/TWIST2/TBX3/MASP1/HGF/TMEM132C/TCEAL7
Cdh1 targets 2 up	Cdh1 targets 2 up	255	0.621512284469833	2.5617764536713765	1e-10	5.2040404040404045e-9	3.779904306220096e-9	3566	tags=52%, list=19%, signal=43%	PTGFR/ZFHX4/SERPINE1/NPTX2/FN1/ITGBL1/SPOCK1/FBN1/RGS4/COL8A1/COL5A1/PRRX1/TRPA1/ZCCHC24/DDR2/ABCA8/PNMA2/ZBTB16/SNED1/CCN2/BGN/COL5A2/CDH18/RHOBTB3/VCAN/SV2A/NEBL/ZEB1/COL3A1/ENPP1/ACTA2/ACKR3/HOXA5/NLRP1/ACKR1/COL1A1/MME/DLC1/ENOX1/PCOLCE/ANOS1/KCNJ6/PLPP3/ADAM12/COL6A3/GREM1/LOX/LIN7A/DCN/MMP2/NID1/IGFBP4/CYP1B1/NAP1L3/ENPP2/CDH11/SERPINF1/IGFBP3/NR2F1/OLFML3/NID2/GALNT10/RNASE4/DUSP1/PCOLCE2/…
Breast lobular carcinoma vs ductal normal up	Breast lobular carcinoma vs ductal normal up	67	0.7328405710387131	2.549717974089598	1e-10	5.2040404040404045e-9	3.779904306220096e-9	3018	tags=69%, list=16%, signal=58%	ASPN/COMP/FN1/FBN1/SFRP2/THBS2/COL8A1/COL5A1/PRRX1/CILP/AEBP1/LRRC15/LAMB1/BGN/SULF2/COL11A1/FNDC1/COL5A2/VCAN/ZEB1/COL3A1/HSPA6/COL1A1/ADAM12/EDNRA/COL6A3/LOX/INHBA/CCN4/COL1A2/SPARC/POSTN/CTHRC1/C5AR1/RGS1/TIE1/ZNF117/PLXNC1/MXRA5/COL12A1/SULF1/IGF1/DOCK1/WIPF1/PLXDC1/CD69
Breast cancer luminal a up	Breast cancer luminal a up	83	0.7032278292366914	2.538395303974483	1e-10	5.2040404040404045e-9	3.779904306220096e-9	2840	tags=66%, list=15%, signal=56%	ATP1A2/GFRA1/ADH1B/ADIPOQ/FABP4/PLIN1/OMD/CPA3/MYH11/ASPN/MFAP4/CIDEC/DPT/SVEP1/CCN5/SFRP4/COL14A1/LMOD1/OGN/LEP/CXCL14/CILP/CFD/ABCA8/TNN/PNMA2/ZBTB16/ADRA2A/F13A1/GPD1/RBP4/HLF/ELOVL2/RTN1/PSD3/ENPP2/FOSB/LIPE/DUSP1/LAMA2/C1orf21/PPARG/ITGA7/HBB/FBLN1/TIMP4/FAXDC2/FHL1/LEPR/IGF1/MAP3K12/CHRDL1/RUNX1/PTGER3/ESR1
Breast lobular carcinoma vs lobular normal dn	Breast lobular carcinoma vs lobular normal dn	72	0.7158726748890408	2.5070144749140275	1e-10	5.2040404040404045e-9	3.779904306220096e-9	2446	tags=53%, list=13%, signal=46%	ASPN/COMP/TMEM119/SFRP4/FN1/FBN1/SFRP2/THBS2/COL8A1/COL5A1/PRRX1/AEBP1/LRRC15/THBS4/LAMB1/BGN/SULF2/COL11A1/FNDC1/COL5A2/VCAN/COL3A1/COL1A1/COL10A1/ADAM12/COL6A3/LOX/MMP2/CCN4/COL1A2/POSTN/CTHRC1/C5AR1/SRPX/RGS1/MXRA5/COL12A1/PABPC1L
Extracellular matrix organization	Extracellular matrix organization	300	0.5990705476412748	2.506497084616236	1e-10	5.2040404040404045e-9	3.779904306220096e-9	2147	tags=42%, list=11%, signal=37%	COL2A1/COL9A3/SCUBE3/NCAN/LRP4/EMILIN3/TNXB/LTBP4/FBN2/CTSG/COL11A2/MMP17/COL26A1/SERPINE1/ASPN/MFAP4/COMP/FBLN2/TNR/COL4A3/DSPP/ADAMTS16/JAM2/EFEMP1/EMILIN1/COL4A4/COL16A1/TLL1/FN1/COL14A1/LAMA1/FBN1/SCUBE1/ELN/CMA1/COL24A1/HSPG2/COL8A1/COL5A1/MMP16/ADAMTS5/PXDN/DDR2/TNN/MMP14/LAMB1/FBN3/MMP3/BGN/COL8A2/MMP8/VTN/COL11A1/ADAMTS4/COL5A2/TGFB2/VCAN/TPSAB1/MUSK/COL3A1/TNC/COL1A1/ADAMTS2/PCOLCE/SH3PX…
Ecm receptor interaction	Ecm receptor interaction	83	0.68440644202204	2.4704569788205792	1e-10	5.2040404040404045e-9	3.779904306220096e-9	3573	tags=58%, list=19%, signal=47%	COL2A1/TNXB/COL11A2/COMP/TNR/COL4A4/FN1/LAMA1/THBS2/SV2B/CD36/HSPG2/COL5A1/TNN/THBS4/LAMB1/VTN/COL11A1/COL5A2/SV2A/CHAD/COL3A1/TNC/COL1A1/COL6A3/ITGA11/LAMA4/GP5/THBS1/ITGA10/LAMA2/VWF/ITGA5/COL1A2/COL6A2/ITGA7/COL4A6/ITGA8/AGRN/GP6/COL6A1/COL6A6/LAMB2/ITGA4/LAMC1/ITGB1/SV2C/LAMA5
Collagen chain trimerization	Collagen chain trimerization	44	0.7610405411655539	2.4600208243514037	1e-10	5.2040404040404045e-9	3.779904306220096e-9	3031	tags=75%, list=16%, signal=63%	COL2A1/COL9A3/COL11A2/COL26A1/COL4A3/COL4A4/COL16A1/COL14A1/COL24A1/COL8A1/COL5A1/COL8A2/COL11A1/COL5A2/COL3A1/COL1A1/COL10A1/COL9A2/COL6A3/COL13A1/COL23A1/COL1A2/COL6A2/COL20A1/COL4A6/COL4A5/COL22A1/COL21A1/COL12A1/COL6A1/COL28A1/COL6A6/COL27A1
Collagens	Collagens	44	0.7610405411655539	2.4600208243514037	1e-10	5.2040404040404045e-9	3.779904306220096e-9	3031	tags=75%, list=16%, signal=63%	COL2A1/COL9A3/COL11A2/COL26A1/COL4A3/COL4A4/COL16A1/COL14A1/COL24A1/COL8A1/COL5A1/COL8A2/COL11A1/COL5A2/COL3A1/COL1A1/COL10A1/COL9A2/COL6A3/COL13A1/COL23A1/COL1A2/COL6A2/COL20A1/COL4A6/COL4A5/COL22A1/COL21A1/COL12A1/COL6A1/COL28A1/COL6A6/COL27A1
Collagen biosynthesis and modifying enzymes	Collagen biosynthesis and modifying enzymes	67	0.7063562171798702	2.457572921352781	1e-10	5.2040404040404045e-9	3.779904306220096e-9	3831	tags=69%, list=20%, signal=55%	COL2A1/COL9A3/COL11A2/COL26A1/COL4A3/COL4A4/COL16A1/TLL1/COL14A1/COL24A1/COL8A1/COL5A1/COL8A2/COL11A1/COL5A2/COL3A1/COL1A1/ADAMTS2/PCOLCE/COL10A1/COL9A2/COL6A3/COL13A1/COL23A1/PCOLCE2/P4HA3/P3H3/COL1A2/COL6A2/COL20A1/COL4A6/COL4A5/COL22A1/COL21A1/P3H2/COL12A1/COL6A1/COL28A1/COL6A6/COL27A1/ADAMTS14/BMP1/COL18A1/P3H1/COL4A2/COLGALT2
Soft tissue tumors pca2 dn	Soft tissue tumors pca2 dn	80	0.6833879391886892	2.4486560779138213	1e-10	5.2040404040404045e-9	3.779904306220096e-9	2816	tags=54%, list=15%, signal=46%	ATP1A2/ADH1B/ADIPOQ/PLA2G2A/FABP4/PLIN1/SFRP1/CCL14/NTRK2/CES1/AOC3/SVEP1/SLC7A10/LMOD1/ASPA/PDK4/CD36/CFD/ABCA8/SEMA3G/GPD1/NPY1R/RBP4/ACKR1/GPX3/ANGPT1/AGT/CLDN5/FOSB/LIPE/ACACB/LPL/PPARG/APOD/CTAG1B/P3H2/TIMP4/AKR1C1/IGF1/ANGPTL4/AQP7/CHRDL1/PTGER3
Invasive carcinoma ductal vs lobular dn	Invasive carcinoma ductal vs lobular dn	46	0.7440571654928685	2.4225997597062383	1.6702077131284332e-10	8.195152512416847e-9	5.9524695941569724e-9	4092	tags=85%, list=22%, signal=66%	ADIPOQ/FABP4/TNXB/SFRP1/NGFR/OMD/ALDH1L1/MFAP4/CIDEC/DPT/TF/ELN/ABCA6/PDK4/MMP3/RBP4/ADCY2/CAV1/VWF/MRGPRF/TNFRSF1B/SPARCL1/SYNE3/EMCN/TEK/PIK3CD/IGF1/ERG/F2R/TXNIP/CD34/GDPD2/PECAM1/ADAM11/RCSD1/POU2F2/TGFBR2/SELENOP/FOXN3
Ncam signaling for neurite out growth	Ncam signaling for neurite out growth	63	0.7003896861429624	2.3967510432934955	1.4141597767806092e-10	7.142893303895783e-9	5.18817131729109e-9	3040	tags=52%, list=16%, signal=44%	COL2A1/COL9A3/GFRA1/NCAN/CACNA1G/CACNA1C/CACNA1I/COL4A3/COL4A4/CACNB4/COL5A1/COL5A2/CACNA1H/ST8SIA2/GFRA2/COL3A1/KRAS/COL9A2/COL6A3/SPTA1/COL6A2/COL4A5/CACNB2/AGRN/SPTB/CNTN2/SPTBN1/CACNB3/FGFR1/COL6A1/FYN/COL6A6/SPTBN4
Breast cancer cluster 4	Breast cancer cluster 4	19	0.8830088023472926	2.368587834742485	4.494726057877382e-10	2.049276871697723e-8	1.4884723927111409e-8	2212	tags=100%, list=12%, signal=88%	FBN1/THBS2/COL5A1/AEBP1/COL5A2/COL3A1/DACT1/PCOLCE/FILIP1L/ADAM12/FAP/CDH11/SERPINF1/NID2/CTSK/COL1A2/HTRA1/SPARC/SRPX2
Degradation of the extracellular matrix	Degradation of the extracellular matrix	140	0.6098621768519762	2.361387994717478	1e-10	5.2040404040404045e-9	3.779904306220096e-9	1749	tags=41%, list=9%, signal=37%	COL2A1/COL9A3/SCUBE3/FBN2/CTSG/COL11A2/MMP17/COL26A1/COL4A3/ADAMTS16/COL4A4/COL16A1/TLL1/FN1/COL14A1/FBN1/SCUBE1/ELN/CMA1/HSPG2/COL8A1/COL5A1/MMP16/ADAMTS5/MMP14/LAMB1/FBN3/MMP3/COL8A2/MMP8/COL11A1/ADAMTS4/COL5A2/TPSAB1/COL3A1/COL1A1/COL10A1/COL9A2/COL6A3/DCN/MMP2/NID1/MMP9/CAPN6/COL13A1/ADAMTS9/ACAN/COL23A1/CTSK/TIMP2/COL1A2/HTRA1/COL6A2/ELANE/MMP19/COL4A6/COL4A5
Non integrin membrane ecm interactions	Non integrin membrane ecm interactions	59	0.6946332168181435	2.3544328829734122	3.9420434590404974e-10	1.8296763874753734e-8	1.3289677095200542e-8	1838	tags=46%, list=10%, signal=41%	COL2A1/COL11A2/COL4A3/COL4A4/FN1/LAMA1/HSPG2/COL5A1/DDR2/LAMB1/VTN/COL11A1/COL5A2/COL3A1/TNC/COL1A1/COL10A1/FGF2/LAMA4/NRXN1/DMD/THBS1/LAMA2/COL1A2/COL4A6/COL4A5/TGFB1
Elastic fibre formation	Elastic fibre formation	45	0.7251777808619211	2.354096245582556	5.268686172026354e-9	1.9813336611883049e-7	1.439122500311463e-7	3026	tags=64%, list=16%, signal=54%	EMILIN3/LTBP4/FBN2/MFAP4/FBLN2/EFEMP1/EMILIN1/FN1/FBN1/ELN/FBN3/VTN/TGFB2/LOX/TGFB3/BMP2/GDF5/BMP4/ITGA5/LOXL3/TGFB1/MFAP2/FBLN1/ITGA8/LTBP2/LOXL2/LOXL1/LTBP1/LTBP3
Integrated tgfb emt up	Integrated tgfb emt up	118	0.6191321762244065	2.341031077062102	1e-10	5.2040404040404045e-9	3.779904306220096e-9	2628	tags=54%, list=14%, signal=47%	SERPINE1/FOXD1/FN1/SPOCK1/FBN1/RGS4/COL5A1/CRLF1/XYLT1/NUAK1/CCN2/MN1/COL5A2/VCAN/MRC2/COL3A1/ACKR3/DACT1/SERPINE2/COL1A1/DLC1/COL6A3/GREM1/LOX/INHBA/MMP2/NEDD9/CDH11/TGM2/GFPT2/SCG2/IL11/THBS1/TGFBI/GALNT10/HS3ST3B1/SNAI2/TIMP2/ZNF365/ITGA5/HTRA1/IGFBP5/SPARC/GASK1B/POSTN/NT5E/LUM/TGFB1/SRPX/MFAP2/ARHGEF40/PMEPA1/CDK14/FSTL3/PID1/TCF4/DSE/SACS/GLIPR1/EPHB2/MAF/DOCK4/ANGPTL4/TGFB1I1
Ncam1 interactions	Ncam1 interactions	42	0.7344271660839933	2.3326090804725883	5.163033859167883e-9	1.9558787090024215e-7	1.4206335425187174e-7	3015	tags=62%, list=16%, signal=52%	COL2A1/COL9A3/GFRA1/NCAN/CACNA1G/CACNA1C/CACNA1I/COL4A3/COL4A4/CACNB4/COL5A1/COL5A2/CACNA1H/ST8SIA2/GFRA2/COL3A1/COL9A2/COL6A3/COL6A2/COL4A5/CACNB2/AGRN/CNTN2/CACNB3/COL6A1/COL6A6
Avb3 integrin pathway	Avb3 integrin pathway	74	0.6622686715338257	2.3298451852817745	1.2603441209542225e-10	6.493292911156155e-9	4.716340368412907e-9	1749	tags=39%, list=9%, signal=36%	COL2A1/COL9A3/COL11A2/COL4A3/COL4A4/COL16A1/FN1/COL14A1/ADGRA2/COL8A1/COL5A1/COL8A2/VTN/COL11A1/COL5A2/COL3A1/COL1A1/COL10A1/COL9A2/COL6A3/FGF2/COL13A1/IRS1/KDR/COL1A2/COL6A2/CSF1R/COL4A6/COL4A5
Mcv6 hcp with h3k27me3	Mcv6 hcp with h3k27me3	432	0.5317225552610445	2.3001728609718173	1e-10	5.2040404040404045e-9	3.779904306220096e-9	2866	tags=45%, list=15%, signal=39%	POU3F3/SYT16/TMEM151B/ZIC1/EMILIN3/SLIT1/SSTR1/TMEM59L/NKX2-4/FOXE1/DHH/PTGIS/GRIN2C/CACNA1G/COMP/NELL1/CACNA1I/SIM2/GABRA4/PTPN5/VSTM2L/NPTX2/FOXC2/TCERG1L/KLHL40/MYOD1/GDF7/NKX6-2/AFF3/SLC7A10/SCUBE1/ADGRA2/CDH22/EFNA2/HTR6/TMEM132E/NTSR1/SLITRK3/ASIC2/SHE/SLC35D3/FEZF2/CRLF1/PAX2/CXCL14/CHRDL2/AEBP1/DOK6/IRX4/DPP10/NKX6-1/CLMP/ZBTB16/NXPH2/NPHS2/CACNA2D2/ELFN2/GJB6/GRID1/PLPPR5/STUM/SYNDIG1L/C…
Proteoglycans	Proteoglycans	34	0.7420325487604694	2.294725098237189	7.96210709392912e-8	2.4417128421382638e-6	1.7735144560725579e-6	2434	tags=65%, list=13%, signal=56%	NCAN/PODN/HAPLN4/OMD/ASPN/SPOCK1/OGN/HSPG2/PRG4/BGN/VCAN/CHAD/DCN/KERA/ACAN/EPYC/LUM/IMPG1/PODNL1/SPOCK2/FMOD/IMPG2
Integrin1 pathway	Integrin1 pathway	66	0.6632385688852406	2.293124277064108	2.482396432554158e-9	9.914191023658156e-8	7.20107655465527e-8	1749	tags=52%, list=9%, signal=47%	COL2A1/COL11A2/COL4A3/JAM2/COL4A4/FN1/LAMA1/FBN1/THBS2/COL5A1/CSPG4/LAMB1/VTN/COL11A1/COL5A2/F13A1/COL3A1/TNC/COL1A1/COL6A3/ITGA11/NID1/TGM2/LAMA4/THBS1/TGFBI/ITGA10/LAMA2/ITGA5/COL1A2/COL6A2/ITGA7/COL4A6/COL4A5
Integrin cell surface interactions	Integrin cell surface interactions	84	0.6334862094972761	2.2899334926253374	1.0575663170759664e-9	4.61744208947066e-8	3.3538343061597334e-8	2147	tags=45%, list=11%, signal=40%	COL2A1/COL9A3/COMP/COL4A3/JAM2/COL4A4/COL16A1/FN1/FBN1/HSPG2/COL8A1/COL5A1/COL8A2/VTN/COL5A2/COL3A1/TNC/COL1A1/COL10A1/COL9A2/COL6A3/ITGA11/COL13A1/THBS1/COL23A1/ITGA10/KDR/VWF/ITGA5/COL1A2/COL6A2/ITGA7/COL4A6/COL4A5/LUM/JAM3/ITGA8/AGRN
Smarce1 targets up	Smarce1 targets up	290	0.5472156987541551	2.2840848324597944	1e-10	5.2040404040404045e-9	3.779904306220096e-9	4490	tags=52%, list=24%, signal=40%	POU3F3/PLP1/NEGR1/NTRK2/GHR/TBX18/FN1/SPOCK1/COL8A1/PRG4/BCAT1/COL5A1/PRRX1/ZNF521/VAT1L/BOC/SULF2/FNDC1/RHOBTB3/TGFB2/VCAN/HMCN1/COL3A1/JCAD/PRSS35/ACTA2/DLL1/SLC22A17/DACT1/COL1A1/TOX2/ANOS1/SLC16A7/HEG1/RTN1/COL6A3/PLXND1/FRY/FAP/DCN/SAMD5/MMP2/SIPA1L2/NID1/ANTXR1/IGFBP4/RASGRF2/GNG2/CCN4/NAP1L3/MAN1C1/IRS1/ACAN/NID2/CGNL1/MCC/GATA3/TGFBI/RNASE4/HS3ST3B1/FZD1/TMEM108/SERPINB7/FOXO1/TIMP2/IGFBP…
Angioimmunoblastic lymphoma up	Angioimmunoblastic lymphoma up	207	0.5635661406343546	2.2789602222262695	1e-10	5.2040404040404045e-9	3.779904306220096e-9	4388	tags=52%, list=23%, signal=40%	CCL14/ABI3BP/MFAP4/EMILIN1/CCDC80/CXCL12/FN1/FBN1/FLRT2/HSPG2/PRRX1/PDGFRA/DDR2/CLMP/LAMB1/DCLK1/COL8A2/PTGDS/CYP26B1/RHOBTB3/ADRA2A/CCL21/COL3A1/ACTA2/TNC/FSTL1/KCNJ10/CAVIN1/C7/ACKR1/COL1A1/PCOLCE/SMOC2/PLPP3/ANTXR1/MMP9/CYP1B1/CCN4/ADAMTS9/ENPP2/CDH11/LAMA4/PAPSS2/PDPN/ANKRD29/IRAK3/VWF/COL1A2/IGFBP5/SPARC/GASK1B/CYBRD1/CTHRC1/SLCO2B1/SPARCL1/GJC1/LUM/CD93/IL33/EMCN/ACVRL1/CFH/PGF/GABBR1/CDH5/…
Tgfb emt up	Tgfb emt up	192	0.566773027270679	2.278916483821649	1e-10	5.2040404040404045e-9	3.779904306220096e-9	4281	tags=55%, list=23%, signal=43%	SERPINE1/FOXD1/KCNJ15/FN1/SPOCK1/FBN1/RGS4/HMGA2/COL5A1/VGLL3/CRLF1/XYLT1/NUAK1/CCN2/MN1/COL5A2/VCAN/MRC2/COL3A1/ACKR3/DACT1/SERPINE2/COL1A1/DLC1/ADAM12/COL6A3/GREM1/LOX/INHBA/MMP2/MMP9/AKT3/NEDD9/BMP2/CDH11/TGM2/RUNX2/MATN3/VIM/GFPT2/SCG2/IL11/THBS1/TGFBI/GALNT10/SLCO2A1/HS3ST3B1/SNAI2/TIMP2/ZNF365/ITGA5/HTRA1/IGFBP5/SPARC/GASK1B/POSTN/ELK3/NT5E/LUM/TGFB1/SRPX/MFAP2/ARHGEF40/PMEPA1/CDK14/FSTL3/P…
Collagen formation	Collagen formation	90	0.6245641313224086	2.2745948611862117	4.0112990184617775e-10	1.8451975484924176e-8	1.3402413543826712e-8	3247	tags=56%, list=17%, signal=46%	COL2A1/COL9A3/COL11A2/COL26A1/COL4A3/COL4A4/COL16A1/TLL1/COL14A1/COL24A1/COL8A1/COL5A1/PXDN/MMP3/COL8A2/COL11A1/COL5A2/COL3A1/COL1A1/ADAMTS2/PCOLCE/COL10A1/COL9A2/COL6A3/LOX/MMP9/COL13A1/COL23A1/PCOLCE2/P4HA3/P3H3/COL1A2/COL6A2/COL20A1/COL4A6/COL4A5/LOXL3/COL22A1/COL21A1/DST/P3H2/COL12A1/LOXL2/LOXL1/COL6A1/COL28A1/COL6A6/COL27A1/ADAMTS14/BMP1
Molecules associated with elastic fibres	Molecules associated with elastic fibres	38	0.7262130009362981	2.265334947206412	7.033959275348943e-8	2.183069770276973e-6	1.5856515677784081e-6	3510	tags=68%, list=19%, signal=56%	EMILIN3/LTBP4/FBN2/MFAP4/FBLN2/EFEMP1/EMILIN1/FN1/FBN1/ELN/FBN3/VTN/TGFB2/TGFB3/BMP2/GDF5/BMP4/TGFB1/MFAP2/FBLN1/ITGA8/LTBP2/LTBP1/LTBP3/ITGB1/BMP7
Breast cancer normal like up	Breast cancer normal like up	456	0.5215509091374539	2.2580952443721514	1e-10	5.2040404040404045e-9	3.779904306220096e-9	4494	tags=47%, list=24%, signal=37%	OPRPN/ADH1B/PLA2G2A/FABP4/CD1E/SFRP1/CTSG/CCL14/NTRK2/MYH11/LYVE1/CES1/MFAP4/AOC3/EFEMP1/EMILIN1/DPT/KIT/SVEP1/CXCL12/COL14A1/GDF7/FCER1A/TF/CMA1/ABCA6/LMOD1/FLRT2/CD22/PDGFRA/HOXA9/SNCAIP/WIF1/SLIT3/ABCA8/SELE/CELF2/PTGDS/CCL21/F13A1/AOAH/HOXA7/EPHA4/ZEB1/GEM/CH25H/ACTA2/FXYD1/LHFPL6/HOXA5/C7/NLRP1/ACKR1/MME/LZTS1/CD1C/CDKN1C/SLC16A7/LILRA4/PLPP3/CLEC10A/PDGFD/DES/KANK3/TP63/BCL11B/DCN/CLDN5/CYP…
Breast carcinoma metaplastic	Breast carcinoma metaplastic	33	0.7368646463441886	2.2503872127681115	1.7637918993961978e-7	4.992887838290775e-6	3.6265356867284466e-6	2491	tags=61%, list=13%, signal=53%	COL16A1/SFRP2/THBS2/MMP16/KCNE4/PRRX1/ADAMTS5/PDGFRA/IGF2/TIMP3/HOXA7/MXRA8/HTRA3/ACAN/THBS1/SPARC/POSTN/LUM/IQCA1/EDIL3
Lymphatic vessels during metastasis dn	Lymphatic vessels during metastasis dn	35	0.723777166961171	2.249956204840477	1.6666174971463972e-7	4.823827722077662e-6	3.5037405099677363e-6	2877	tags=66%, list=15%, signal=56%	JAM2/FOXC2/FBN1/COL5A1/BGN/COL5A2/VCAN/COL3A1/PCOLCE/COL6A3/LOX/CDH11/PCOLCE2/LAMA2/COL1A2/COL6A2/NT5E/GPC1/LTBP2/LOXL1/COL6A1/TWIST2/LTBP1
Basement membranes	Basement membranes	40	0.7162685480918355	2.2363428615762206	1.087400509080645e-7	3.2571438504555137e-6	2.3657948652274747e-6	4140	tags=75%, list=22%, signal=59%	COL4A3/COL4A4/LAMA1/NTN3/HSPG2/LAMB1/HMCN1/PAPLN/COL6A3/NID1/LAMA4/NID2/NTNG1/LAMA2/COL6A2/COL4A6/COL4A5/AGRN/NTN5/COL6A1/COL6A6/LAMB2/LAMC1/LAMA5/COL18A1/COL4A2/NTN1/LAMB3/COL4A1/COL15A1
Pdef targets up	Pdef targets up	71	0.6386599667581743	2.2352207450279025	6.6562700044371575e-9	2.4495073616328736e-7	1.7791759297574508e-7	4442	tags=65%, list=24%, signal=50%	SERPINE1/COL16A1/FN1/COL5A1/DKK3/CCN2/COL5A2/CDH18/ZEB1/TNC/COL1A1/COL6A3/COL13A1/BMP2/CDH11/VIM/TGFBI/FZD1/SERPINB7/SNAI2/ITGA5/COL6A2/COL4A6/COL4A5/TGFB1/SERPINI1/PLCG1/DOCK10/TCF4/PIK3CD/DOCK4/MAP4K4/DOCK1/COL6A1/WIPF1/LAMB2/LAMC1/MAPKBP1/FZD8/COL4A2/COL4A1/WNT5A/PLCE1/SDC1/CDH2/SDC2
Targets of ewsr1 ets fusions dn	Targets of ewsr1 ets fusions dn	223	0.5426573883331212	2.215289880739089	1e-10	5.2040404040404045e-9	3.779904306220096e-9	3638	tags=43%, list=19%, signal=35%	DKK1/PDE1C/FOXD1/FGF7/CCDC80/AFF3/ADAMTSL1/HMGA2/TENM3/COL8A1/COL5A1/VGLL3/PRRX1/ADAMTS5/NRG1/MMP14/RBMS3/HSPB7/COL11A1/VCAN/APCDD1L/COL3A1/ALDH1A3/BMERB1/MME/FILIP1L/GLT8D2/SLC16A7/PLPP3/ANGPT1/ADAM12/ITGA11/ACTG2/GRIA1/ENPP2/IGFBP3/IRS1/GFPT2/KCTD4/NID2/FIBIN/IL6/PRICKLE2/SERPINB7/PDZRN3/GALNT5/EYA4/ZNF365/COL1A2/PLXNA1/SPARC/GASK1B/HR/SYNC/ADAMTS12/SVIL/LUM/SRPX/SPOCD1/C10orf90/EGFR/FAM126A/TA…
Prodrank tgfb emt up	Prodrank tgfb emt up	185	0.5523080481947004	2.213435040498045	1e-10	5.2040404040404045e-9	3.779904306220096e-9	4281	tags=54%, list=23%, signal=42%	SERPINE1/FOXD1/KCNJ15/FN1/SPOCK1/FBN1/RGS4/HMGA2/COL5A1/CRLF1/XYLT1/NUAK1/CCN2/MN1/VCAN/MRC2/ACKR3/DACT1/SERPINE2/COL1A1/DLC1/ADAM12/GREM1/LOX/INHBA/MMP2/MMP9/AKT3/NEDD9/BMP2/CDH11/TGM2/RUNX2/MATN3/VIM/GFPT2/IL11/THBS1/TGFBI/GALNT10/SLCO2A1/SNAI2/TIMP2/ZNF365/ITGA5/HTRA1/IGFBP5/SPARC/GASK1B/POSTN/ELK3/NT5E/TGFB1/SRPX/MFAP2/ARHGEF40/PMEPA1/CDK14/FSTL3/PID1/TCF4/DSE/SACS/GLIPR1/APBB2/EPHB2/CHST11/M…
Pilocytic astrocytoma vs glioblastoma up	Pilocytic astrocytoma vs glioblastoma up	34	0.715046863707202	2.211272251204671	8.549766870018359e-7	1.9752645253064836e-5	1.4347142422900767e-5	2191	tags=47%, list=12%, signal=42%	ATP1A2/PLA2G2A/GFAP/SPOCK1/TF/SCRG1/DKK3/GALNT13/OLIG2/SERPINE2/ANGPTL2/SOX8/HTRA1/APOD/NLGN2/RASSF2
Mir21 targets heart disease up	Mir21 targets heart disease up	18	0.8388300675724698	2.2110831135107776	3.263893967572362e-7	8.492718040875157e-6	6.168603431536283e-6	1899	tags=83%, list=10%, signal=75%	ASPN/SVEP1/CCN5/ELN/CRLF1/BGN/COL5A2/COL1A1/LOX/TGFB3/COL1A2/POSTN/APOD/LUM/NMRK2
Adipogenesis late dn	Adipogenesis late dn	35	0.7058186341916193	2.1941297515077047	7.876571386503696e-7	1.836203429107106e-5	1.3337085629445415e-5	2558	tags=49%, list=14%, signal=42%	COL9A3/SERPINE1/MYH11/ABI3BP/CXCL12/THBS2/DKK3/TIMP3/SERPINE2/LOX/ACTG2/POSTN/CCN1/NT5E/GLIPR1/EDIL3/RAI14
Neural crest differentiation	Neural crest differentiation	100	0.5949994277504367	2.190997459002818	1.0871328815472138e-9	4.706645887169114e-8	3.4186266199914597e-8	2782	tags=44%, list=15%, signal=38%	OLIG3/COL2A1/ZIC1/PAX3/GBX2/GFAP/COL11A2/ISL1/OLIG1/CDH7/PRTG/TCF7L1/HOXA1/FGF19/OLIG2/ZIC5/DLL1/WNT8A/FGF2/LHX1/WNT1/ID1/BMP4/MIA/SNAI2/NOTCH3/TWIST1/WNT3A/NOTCH2/NOTCH1/FGFR3/FOXD3/TCF4/DCT/MPZ/ASCL1/DLL4/SNAI1/HDAC5/HDAC4/MSX2/RHOB/FGFR1/SOX10
Mll targets	Mll targets	290	0.523731397151856	2.1860610783663996	1e-10	5.2040404040404045e-9	3.779904306220096e-9	3522	tags=42%, list=19%, signal=35%	COL2A1/ADH1B/FGF10/PTGFR/FABP4/PAX3/FBN2/SFRP1/OMD/NEGR1/KCNC2/ABI3BP/CACNA1G/ASPN/FOXD1/KCNA4/TMEM119/JAM2/SLC8A3/EMILIN1/KCNJ15/HOXA10/SVEP1/FOXC2/CCDC80/COL14A1/LAMA1/SFRP2/THBS2/ASPA/PDK4/HOXC13/EGR3/NKX6-1/SLIT3/MMP14/CLMP/PNMA2/DKK3/SNED1/SLC10A6/GDF6/ANO4/ABCA9/MRC2/ENPP1/WNK4/HLF/DLL1/HTR2A/MME/SMOC2/SH3RF3/ZIC2/GLT8D2/SLC16A7/COL10A1/ANGPT1/AGT/RSPO2/SASH1/MMP2/CPZ/FABP7/GATA4/SMOC1/F5/T…
Sensory perception of taste	Sensory perception of taste	44	0.6753119603444688	2.1829079996667007	5.259232938675943e-7	1.2602589813980677e-5	9.153768958136097e-6	3690	tags=64%, list=20%, signal=51%	TAS1R2/TAS2R13/GNAT3/SCN3A/CALHM1/SCNN1G/GRM1/SCN2A/GNB3/ITPR3/TAS2R38/TAS2R31/SCNN1B/TAS2R43/TAS1R3/TAS2R46/TAS2R40/TAS2R3/TAS2R50/SCN4B/TAS2R30/TAS2R20/TAS1R1/SCN1B/CALHM3/TAS2R8/PLCB2/TRPM5
Breast cancer basal vs mesenchymal dn	Breast cancer basal vs mesenchymal dn	52	0.659866920618762	2.176777127056935	2.997453643688904e-7	7.919426242197555e-6	5.752198490317978e-6	3000	tags=60%, list=16%, signal=50%	FLNC/KLF2/BCAT1/MMP16/ZCCHC24/PNMA2/NUAK1/ZEB1/GRK5/GFPT2/SCG2/IL11/ALPK2/FZD2/SHOX2/COL6A2/ADAMTS12/KIF3C/ARHGEF40/APLP1/SH2B3/ARNT2/MAP1B/EDIL3/GULP1/GNG11/LOXL2/RNF182/TUBB2A/UTRN/CMTM3
Nf1 targets dn	Nf1 targets dn	109	0.5828566185927917	2.176525638350722	2.8424794756165975e-9	1.1094283529073265e-7	8.058225307669063e-8	2751	tags=48%, list=15%, signal=41%	ADGRL3/DCHS1/ZNF423/FN1/EFNA2/ADCY1/PDK4/MMP16/SLC35D3/ADAMTS5/PDGFRA/BOC/BGN/ST8SIA2/LHX9/GFRA2/HMCN1/COL3A1/TNRC18/FSTL1/ST6GAL2/C7/LIX1/NECAB2/LRRN1/SERPINF1/NR2F1/PHACTR3/LATS2/GATA3/FRMD4A/ARHGAP28/IGFBP5/FAM124A/HRK/ST8SIA1/MFAP2/FBLN1/SNAP91/PRKD1/FBXL7/GREM2/LEPR/TMEM44/PRICKLE1/TMEM204/TMEM200B/SSTR2/SATB1/CCDC3/UCMA/CAMK1D
Breast cancer luminal vs mesenchymal dn	Breast cancer luminal vs mesenchymal dn	462	0.5007357420976335	2.1740182404195196	1e-10	5.2040404040404045e-9	3.779904306220096e-9	4114	tags=42%, list=22%, signal=34%	FLNC/SFRP1/SERPINE1/CAVIN2/FBN1/RGS4/HMGA2/FLRT2/BCAT1/COL5A1/ADAMTS5/PXDN/PHLDB2/NAV3/NAV1/ZCCHC24/CLMP/PNMA2/FXYD5/DKK3/RBMS3/LAMB1/CYP26B1/TGFB2/APCDD1L/SV2A/MRC2/ZEB1/SMAD9/MSRB3/C9/ACTA2/CLIP2/FSTL1/SERPINE2/CAVIN1/CDK6/LHFPL6/TOX2/ZIC2/SLC16A7/HEG1/COL6A3/GRK5/RGS2/INHBA/MMP2/ANTXR1/AKT3/COL13A1/GNG2/GPR176/CDH11/CCBE1/KATNAL1/RUNX2/NR2F1/CNRIP1/VIM/GFPT2/PDE7B/NID2/ANTXR2/DMD/PAPPA/IL11/FZ…
Emt breast tumor up	Emt breast tumor up	139	0.5607649141132014	2.173117471015955	1.4591767285821844e-10	7.298716995781955e-9	5.30135234553875e-9	5652	tags=65%, list=30%, signal=46%	FLNC/LRP1/MEDAG/FN1/ADGRA2/HSPG2/PRRX1/PDGFRA/DDR2/FXYD5/LAMB1/F13A1/MRC2/ZEB1/MXRA8/RRAD/PCOLCE/PLXND1/HTRA3/DCN/IGFBP4/ANKRD1/OSR1/NR2F1/VIM/ANGPTL2/AXL/MARVELD1/PKD1/TIMP2/TTYH2/ITGA5/CSF1R/LOXL3/MRC1/ARHGEF40/CFH/APBB1/SACS/GLIPR1/APBB2/MRAS/B3GNT9/DAB2/IL18R1/FKBP7/DNM1/SPTBN1/LOXL1/SEMA7A/EPB41L2/C1QTNF6/VSIG4/NRROS/CLEC4A/ZFPM2/ST3GAL2/AOX1/FCGR2B/P3H1/NFATC1/TSPAN4/TGFBR2/FOLR2/GPR34/DBN1…
Glioblastoma plasticity dn	Glioblastoma plasticity dn	60	0.6379016881923854	2.1719966391621304	2.1997340501840658e-7	5.996312077538787e-6	4.355363157006045e-6	3459	tags=52%, list=18%, signal=42%	COL9A3/CNGA2/EMILIN1/KCNA6/CSPG4/TIMP3/PGM5/PTGDS/EFS/PLAGL1/FOSB/SYN2/MAPT/PVALB/PCOLCE2/CAV1/ITGA5/COL6A2/LSAMP/ITGA7/CCN1/PADI2/EPHB1/DRAXIN/PSD2/ZFP36/NDRG2/EMP1/NISCH/ARVCF/ZDHHC14
Assembly of collagen fibrils and other multimeric structures	Assembly of collagen fibrils and other multimeric structures	61	0.6357952685742274	2.1696584504280643	2.2284545260383209e-7	6.042630377973383e-6	4.389006005576859e-6	3031	tags=57%, list=16%, signal=48%	COL2A1/COL9A3/COL11A2/COL4A3/COL4A4/TLL1/COL14A1/COL24A1/COL8A1/COL5A1/PXDN/MMP3/COL8A2/COL11A1/COL5A2/COL3A1/COL1A1/PCOLCE/COL10A1/COL9A2/COL6A3/LOX/MMP9/COL1A2/COL6A2/COL4A6/COL4A5/LOXL3/DST/COL12A1/LOXL2/LOXL1/COL6A1/COL6A6/COL27A1
Met activates ptk2 signaling	Met activates ptk2 signaling	30	0.7227798680503927	2.169336060069493	4.528617823029104e-6	8.771217678287949e-5	6.370888943754835e-5	3878	tags=70%, list=21%, signal=56%	COL2A1/COL11A2/FN1/LAMA1/COL24A1/COL5A1/LAMB1/COL11A1/COL5A2/COL3A1/COL1A1/LAMA4/LAMA2/COL1A2/COL27A1/HGF/LAMB2/LAMC1/ITGB1/LAMA5/LAMB3
Signaling by type 1 insulin like growth factor 1 receptor igf1r	Signaling by type 1 insulin like growth factor 1 receptor igf1r	53	0.6484662505919299	2.164366225598096	9.332030941188727e-7	2.1368277070668586e-5	1.5520640933766517e-5	2880	tags=47%, list=15%, signal=40%	FGF10/FGF17/IRS4/FGF7/FGF23/FGF19/IGF2/CILP/KLB/TLR9/KRAS/FGF1/FGF2/KL/IRS1/FGF4/IRS2/FGF22/PDE3B/FRS2/FGFR3/IGF1/AKT2/FGFR1/IGF1R
Gdnfret signaling axis	Gdnfret signaling axis	23	0.7646017598635978	2.1618303632388987	4.346206168532375e-6	8.513936950676348e-5	6.18401558100164e-5	1542	tags=57%, list=8%, signal=52%	GFRA1/SOX11/SALL1/EYA1/FOXC2/PAX2/GLI3/GREM1/LHX1/GATA3/BMP4/FAT4/SLIT2
Signaling by pdgf	Signaling by pdgf	58	0.6378100729204523	2.1592155994464597	1.0784851471811865e-7	3.249330689051154e-6	2.3601198511721258e-6	4222	tags=52%, list=23%, signal=40%	COL2A1/COL9A3/COL4A3/COL4A4/THBS2/COL5A1/PDGFRA/THBS4/COL5A2/COL3A1/KRAS/PDGFRB/COL9A2/PDGFD/COL6A3/THBS1/COL6A2/COL4A5/PLCG1/COL6A1/RASA1/STAT5B/COL6A6/STAT5A/PIK3CB/PLG/COL4A2/COL4A1/PDGFA/PTPN11
Syndecan 1 pathway	Syndecan 1 pathway	46	0.6615410731975566	2.1539329493623005	4.737399958603989e-7	1.1622421231775121e-5	8.441833008940944e-6	1838	tags=52%, list=10%, signal=47%	COL2A1/COL9A3/COL11A2/COL4A3/COL4A4/COL16A1/COL14A1/COL8A1/COL5A1/COL8A2/COL11A1/COL5A2/COL3A1/COL1A1/COL10A1/COL9A2/COL6A3/MMP9/COL13A1/COL1A2/COL6A2/COL4A6/COL4A5/TGFB1
Endochondral ossification	Endochondral ossification	63	0.629366588330888	2.15370822420738	4.1503917780860086e-7	1.053340809886656e-5	7.650838875341334e-6	2928	tags=49%, list=16%, signal=42%	COL2A1/GHR/PTH1R/ADAMTS5/NKX3-2/IGF2/DDR2/TIMP3/ADAMTS4/TGFB2/GLI3/BMP6/ENPP1/CDKN1C/COL10A1/MMP9/FGF2/RUNX2/ACAN/RUNX3/MGP/TGFB1/FGFR3/CHST11/HDAC4/IGF1/FRZB/SOX6/FGFR1/IGF1R/STAT5B
Endochondral ossification with skeletal dysplasias	Endochondral ossification with skeletal dysplasias	63	0.629366588330888	2.15370822420738	4.1503917780860086e-7	1.053340809886656e-5	7.650838875341334e-6	2928	tags=49%, list=16%, signal=42%	COL2A1/GHR/PTH1R/ADAMTS5/NKX3-2/IGF2/DDR2/TIMP3/ADAMTS4/TGFB2/GLI3/BMP6/ENPP1/CDKN1C/COL10A1/MMP9/FGF2/RUNX2/ACAN/RUNX3/MGP/TGFB1/FGFR3/CHST11/HDAC4/IGF1/FRZB/SOX6/FGFR1/IGF1R/STAT5B
Tp53 and tp63 targets	Tp53 and tp63 targets	203	0.5309166992477472	2.150716307842615	1e-10	5.2040404040404045e-9	3.779904306220096e-9	4233	tags=47%, list=23%, signal=37%	COL9A3/NGFR/SHISAL1/CRISPLD2/ADCY1/CXCL14/IGF2/ZCCHC24/PLIN4/NUAK1/FOXP4/CELF2/ST8SIA2/SMAD9/NLRP1/ZIC2/CDKN1C/PLPP3/SASH1/FRY/GRK5/NEFL/SIPA1L2/WFDC5/EPB41L3/BMP2/IGFBP3/MAN1C1/SOX8/CGNL1/KSR1/FOXF1/CABP7/FZD1/APC2/NOTCH3/SLIT2/FAM43A/ZNF750/HR/ARX/MOXD1/APAF1/EGR1/PPP2R2C/NPTX1/BAMBI/GLIS2/PGF/ARHGEF6/TSC22D3/ANKRD20A1/BTBD11/SHANK3/WNT7B/HIC2/PTPRJ/MAF/MXRA5/KCNK3/RAB11FIP1/STAR/RHOB/ARID1B/UL…
Ewing sarcoma progenitor dn	Ewing sarcoma progenitor dn	185	0.5350288412151918	2.1441867245890576	1e-10	5.2040404040404045e-9	3.779904306220096e-9	3390	tags=45%, list=18%, signal=38%	PTGFR/GALNT15/PTGIS/PIEZO2/FGF7/KCNJ15/SVEP1/CCN5/SFRP4/CXCL12/COL14A1/SCRG1/PDK4/ECM2/PRG4/MMP16/PRRX1/PDGFRA/IGF2/ZNF521/SLIT3/GPC6/IL13RA2/VCAN/APCDD1L/ALDH1A3/MME/GLT8D2/COL10A1/HEG1/PLPP3/ADAM12/PDE4B/BDKRB1/DCN/PSD3/GNG2/CCN4/OSR1/CCBE1/LAMA4/RUNX2/GFPT2/KCTD4/PDE7B/GDF5/EBF1/FIBIN/BMP4/PCOLCE2/PDZRN3/BICC1/CLDN11/COL6A2/ITPR3/MOXD1/MRGPRF/LUM/SRPX/FBLN1/EGFR/KCNK2/TANC2/HEPH/RPS6KA2/PPL/ET…
Prostate cancer dn	Prostate cancer dn	494	0.49024901077700367	2.1358996922424796	1e-10	5.2040404040404045e-9	3.779904306220096e-9	4350	tags=47%, list=23%, signal=37%	ATP1A2/ANGPTL1/FLNC/SEMG1/PODN/SEMG2/MYH11/FCGBP/HOXD13/AOC3/EFEMP1/DPT/KIT/COL16A1/COL14A1/DTNA/FBN1/CRISPLD2/ADGRA2/SCRG1/LMOD1/PDK4/CPAMD8/HSPG2/COL5A1/PRRX1/ADAMTS5/TRPC4/IGF2/AEBP1/WIF1/CFD/DDR2/CLMP/GPC6/DKK3/LAMB1/TSLP/PENK/TIMP3/TSPAN18/PGM5/PTGDS/EFS/TGFB2/MRC2/MSRB3/RBP4/CCND2/ACTA2/HLF/ACKR3/CAVIN1/C7/NLRP1/MME/SH3PXD2A/IRAG1/PLPP3/PDGFD/DES/PLAGL1/GRK5/TP63/TGFB3/EPHA7/NID1/EHD2/ACTG2…
Mdm4 targets neuroepithelium dn	Mdm4 targets neuroepithelium dn	155	0.5432268463589243	2.1357778191345953	8.68056806103109e-10	3.85536953883036e-8	2.800310295550411e-8	3652	tags=44%, list=19%, signal=36%	POU3F4/GFRA1/ELAVL3/NCAN/CNMD/BRINP1/SOGA3/JAM2/MYT1/TAL1/SLC17A6/RGS4/HAND2/PDGFRA/ELAVL2/FSTL5/TBR1/F13A1/FOXG1/STMN2/RTN1/RSPO2/LRRN1/FABP7/SCG3/C1QTNF3/MAPK10/NEUROD1/NHLH2/APC2/KCNA5/SHOX2/CSF2RB/FMN2/IGFBP5/SYT11/CSF1R/MRC1/ZCCHC18/EOMES/JAKMIP2/GREM2/TSPYL4/DACH1/MAP2/FGD4/BHLHE22/PRMT8/MAF/ASCL1/SCRN1/SATB1/CACNG4/ZMAT1/RNF182/FYN/CDK5R1/PKIA/VCAM1/CX3CR1/RAPGEF5/BRSK2/FOS/SLC4A5/RHBDL3/T…
Differentiation of white and brown adipocyte	Differentiation of white and brown adipocyte	25	0.7425537392078533	2.1352870753836033	6.4516268144369846e-6	1.1870993338564051e-4	8.62238094936973e-5	1697	tags=48%, list=9%, signal=44%	ADIPOQ/ZIC1/CIDEA/ZNF423/SLC7A10/LEP/HSPB7/SMAD9/PRDM16/BMP2/BMP4/PPARG
Lung cancer kras dn	Lung cancer kras dn	415	0.4945645508738047	2.1288401347897445	1e-10	5.2040404040404045e-9	3.779904306220096e-9	3864	tags=45%, list=21%, signal=37%	ATP1A2/ADH1B/ADIPOQ/SOX11/TNXB/LTBP4/OMD/MYH11/LYVE1/PTGIS/CAVIN2/CES1/CIDEC/FGF7/ADRB3/DPT/KIT/CCN5/INMT/KLF2/GPR182/ACTC1/OGN/SHE/PTPRD/PDGFRA/CXCL14/SCN7A/ALAS2/HOXA6/CFD/EPHA5/ZBTB16/LAMB1/TIMP3/CCL21/MYH1/GFRA2/ZEB1/BMP6/COL3A1/ACTA2/FXYD1/ACKR3/STMN2/PDGFRB/CAVIN1/CYP2A6/HOXA5/COL1A1/GPX3/HBD/PEG3/CDKN1C/PLPP3/ANGPT1/PRX/KANK3/CCKAR/LOX/SASH1/GRK5/DCN/RGS2/NID1/CLDN5/IL11RA/PLAC9/ANKRD1/COL…
Met promotes cell motility	Met promotes cell motility	41	0.6724534258491226	2.1257106297079846	2.0759226854448883e-6	4.3476234452894567e-5	3.157854149232596e-5	3573	tags=54%, list=19%, signal=44%	COL2A1/COL11A2/FN1/LAMA1/COL24A1/COL5A1/LAMB1/COL11A1/COL5A2/COL3A1/COL1A1/LAMA4/LAMA2/COL1A2/TNS4/COL27A1/HGF/LAMB2/GAB1/LAMC1/ITGB1/LAMA5
Response to progesterone dn	Response to progesterone dn	59	0.6259332377831811	2.121576915560259	2.979501900168314e-7	7.912574118385131e-6	5.747221516602472e-6	3764	tags=59%, list=20%, signal=48%	CUX2/COL16A1/FN1/COL8A2/PCDHGC3/COL11A1/COL5A2/MYH1/COL1A1/MME/DES/INHBA/MMP2/L1CAM/PCDHGA1/IGFBP3/THBS1/NTM/FRMD4A/COL1A2/IGFBP5/MGP/DST/COX7A1/KCNK3/STAR/LOXL2/PIEZO1/COL6A1/IGF1R/SPON2/PLAU/NBPF10/PECAM1/MICAL2
Cmv 24 hr dn	Cmv 24 hr dn	83	0.5874320550895025	2.120414904031605	2.0847394848490134e-7	5.774504207495762e-6	4.194255160519662e-6	4450	tags=59%, list=24%, signal=45%	SERPINE1/PTGIS/EFEMP1/CXCL12/THBS2/PDGFRA/IGF2/CFD/DDR2/TIMP3/MN1/COL5A2/ADRA2A/VCAN/COL3A1/ACTA2/ACKR3/COL1A1/LOX/CYP1B1/CDH11/IGFBP3/LAMA4/THBS1/BCL2/COL1A2/MBL2/IGFBP5/COL6A2/POSTN/HSD17B2/AKR1C1/HIVEP2/MYLK/RUNX1/TRAM2/CNN2/IGF1R/LAMB2/MITF/ABL1/GAS1/ID2/XPC/CCND1/FLNA/TGFBR3/TAGLN/NR3C1
Breast cancer 7p15 amplicon	Breast cancer 7p15 amplicon	11	0.9138866459034434	2.119456646398786	1.185768064324325e-7	3.490901181370813e-6	2.535582236795775e-6	915	tags=82%, list=5%, signal=78%	HOXA2/HOXA4/HOXA10/HOXA1/HOXA9/HOXA3/HOXA6/HOXA7/HOXA5
Stem cell cultured vs fresh dn	Stem cell cultured vs fresh dn	31	0.6985567432637336	2.118238476486762	9.5769287162842e-6	1.6612907995385923e-4	1.2066624698348515e-4	2576	tags=58%, list=14%, signal=50%	ADH1B/FABP4/OMD/NTRK2/DPT/CCN5/OGN/CXCL14/CFD/C7/FOSB/PTGER4/APOD/SPARCL1/PPL/CPVL/NAALAD2/IGF1
Laminin interactions	Laminin interactions	30	0.7057225092362374	2.1181404676066	1.3748837147330394e-5	2.2608405701484254e-4	1.642139634455225e-4	4017	tags=67%, list=21%, signal=52%	COL4A3/COL4A4/LAMA1/HSPG2/LAMB1/NID1/LAMA4/NID2/LAMA2/ITGA7/COL4A6/COL4A5/LAMB2/LAMC1/ITGB1/LAMA5/COL18A1/COL4A2/LAMB3/COL4A1
Monoamine gpcrs	Monoamine gpcrs	33	0.6914967147745976	2.1118333907324462	5.784874890129706e-6	1.0720746558974188e-4	7.786910350023137e-5	3574	tags=61%, list=19%, signal=49%	HTR1E/ADRA1A/HTR5A/ADRB3/HTR6/ADRA2B/HTR7/ADRA2A/DRD1/HTR2A/HRH2/HTR1D/ADRB2/HTR4/DRD4/HTR1A/ADRB1/ADRA1D/HTR2C/ADRA1B
Adipogenesis	Adipogenesis	143	0.5427192057261037	2.1043048908844333	4.054921820858002e-9	1.570748663237626e-7	1.1408980667313177e-7	3313	tags=41%, list=18%, signal=34%	ADIPOQ/FABP4/PLIN1/SERPINE1/IRS4/PTGIS/CNTFR/AOC3/ADRB3/FOXC2/SFRP4/SPOCK1/LEP/CFD/CYP26A1/WNT10B/BMP3/CYP26B1/ASIP/AGT/GATA2/SLC2A4/BMP2/WNT1/GATA4/ID3/IRS1/NR2F1/LIPE/LPL/GATA3/EBF1/BMP4/IL6/FZD1/FOXO1/TWIST1/PPARG/IRS2/NCOR2/LUM/TGFB1/KLF15/NDN/IGF1/FRZB/EPAS1/KLF6/LPIN1/STAT5B/STAT5A/LPIN3/RB1/MIXL1/MEF2D/KLF7/BMP1/PPARA
Collagen degradation	Collagen degradation	64	0.6124601201901649	2.102595296548884	1.326604607909962e-6	2.9715943217183146e-5	2.1583887327779934e-5	1749	tags=50%, list=9%, signal=45%	COL2A1/COL9A3/COL11A2/COL26A1/COL4A3/COL4A4/COL16A1/COL14A1/COL8A1/COL5A1/MMP14/MMP3/COL8A2/MMP8/COL11A1/COL5A2/COL3A1/COL1A1/COL10A1/COL9A2/COL6A3/MMP2/MMP9/COL13A1/COL23A1/CTSK/COL1A2/COL6A2/ELANE/MMP19/COL4A6/COL4A5
O glycosylation of tsr domain containing proteins	O glycosylation of tsr domain containing proteins	38	0.6730682575347173	2.0995562509661903	6.752372229136738e-6	1.212133161132839e-4	8.804211727335816e-5	2070	tags=45%, list=11%, signal=40%	ADAMTS16/ADAMTSL1/THBS2/ADAMTS5/ADAMTSL2/ADAMTS7/ADAMTSL4/ADAMTS4/ADAMTS19/ADAMTS10/ADAMTS2/ADAMTS9/THBS1/THSD7A/ADAMTS12/ADAMTSL3/ADAMTS18
Familial partial lipodystrophy fpld	Familial partial lipodystrophy fpld	29	0.7020741814743323	2.0916448346058707	1.002287045407618e-5	1.7270176782408186e-4	1.2544025511086369e-4	3313	tags=52%, list=18%, signal=43%	CIDEA/FABP4/PLIN1/CIDEC/KLF2/PRRX1/GATA2/LIPE/LPL/GATA3/PPARG/AKT2/STAT5B/KLF9/PPARA
Bladder cancer cluster 2b	Bladder cancer cluster 2b	383	0.4886295086976554	2.090336054353647	1e-10	5.2040404040404045e-9	3.779904306220096e-9	4167	tags=43%, list=22%, signal=34%	ATP1A2/CTSG/ABI3BP/FBLN2/AOC3/EFEMP1/COL16A1/SVEP1/CCDC80/CXCL12/CRISPLD2/ELN/THBS2/ECM2/PRRX1/PXDN/PDGFRA/NR4A1/AEBP1/DDR2/GPC6/NUAK1/SELE/DKK3/CCN2/STUM/CELF2/COL5A2/GEM/CH25H/ACTA2/TNC/HLF/PDGFRB/CAVIN1/PCOLCE/FILIP1L/IGDCC4/CLEC10A/EDNRA/COL6A3/HTRA3/GRK5/PREX1/RGS2/MMP2/ACTG2/ADAMTS9/SERPINF1/LAMA4/RUNX2/NR2F1/PPP1R12B/CNRIP1/RUNX3/ANGPTL2/NID2/LATS2/THBD/PAPPA/FOXF1/PDPN/EBF1/LIX1L/CD302/CO…
Ewing family tumor	Ewing family tumor	31	0.6889934587633811	2.089239662309417	1.3685382943670188e-5	2.2598427219804108e-4	1.6414148571102403e-4	2179	tags=52%, list=12%, signal=46%	NPY5R/PCDH11X/CNMD/ADRB3/CYP26B1/NPY1R/PRSS35/BCL11B/MAGED4/PAPPA/LIPI/DKK2/ARX/UGT3A2/PCDH8/BHLHE22
Prostate development 48hr dn	Prostate development 48hr dn	404	0.48471123755362655	2.0829182535600776	1e-10	5.2040404040404045e-9	3.779904306220096e-9	4115	tags=43%, list=22%, signal=34%	WFIKKN2/ADGRL3/EMILIN3/CDH10/NEGR1/NTRK2/BACH2/KIF26B/CACNA1G/MFAP4/KCNA4/TRIL/LRFN5/GABRA1/PRTG/GABRA4/CCDC80/TCERG1L/ZMAT4/SLC7A10/LRFN2/TMEM132E/ELN/LMO3/CAMKV/SLC1A6/COL8A1/BCAT1/MMP16/PRRX1/MEX3B/SLITRK1/ZNF521/SHISA2/DPP10/DDR2/RAB3B/EPHA5/SLC26A7/NUAK1/RBMS3/MMP3/TSPAN18/BMP3/AMHR2/STARD9/HAVCR1/ZEB1/ENPP1/ADGRB2/KRT75/PDGFRB/ADAMTS19/ONECUT2/FILIP1L/IGDCC4/RSPO2/CCKAR/EDNRA/GREM1/IL17RD/T…
Medullary vs ductal breast cancer dn	Medullary vs ductal breast cancer dn	172	0.5215296582762533	2.0795513066289875	2.6424935541531663e-9	1.0392463199234437e-7	7.548464913631583e-8	4660	tags=51%, list=25%, signal=39%	FLNC/PTPRZ1/AOC3/DACT3/SPOCK1/RGS4/HSPG2/COL8A1/NAV3/ZCCHC24/DDR2/SLIT3/THBS4/BOC/BGN/TIMP3/MSRB3/MXRA8/ENPP1/MDFI/ACTA2/FSTL1/CAVIN1/CTNND2/DLC1/SH3PXD2A/IRAG1/ADAM12/PDGFD/EDNRA/FAP/ACTG2/KATNAL1/EFR3B/CAV1/LAMA2/SNAI2/AQP1/ELAPOR2/ADAMTS12/NPR2/SLC4A3/ZNF385D/GPC1/FHL1/SRPX2/SPRED2/SPEG/PRICKLE1/KANK2/LIMS2/PDE5A/KIDINS220/TGFB1I1/MYLK/SMIM10L2A/RUNX1/RFLNB/KCNMB1/EPHA3/CNN2/MPRIP/MAPK7/APBA1/…
Solid nodular breast tumor dn	Solid nodular breast tumor dn	29	0.6973121119446015	2.077457504553399	1.4454200488010868e-5	2.3503063661878295e-4	1.707122248242427e-4	3232	tags=66%, list=17%, signal=54%	COL2A1/TSPAN11/RBMS3/GLI3/NID1/IGFBP4/ADAMTS9/ENPP2/BMP2/PDPN/SPARC/TWIST1/AQP1/RYR1/LRRC8C/ANKRD44/PTPRS/VASH2/GJA1
Stem cell cultured vs fresh up	Stem cell cultured vs fresh up	427	0.480868637732995	2.076832937797925	1e-10	5.2040404040404045e-9	3.779904306220096e-9	3306	tags=37%, list=18%, signal=32%	ADH1B/FLNC/LTBP4/OMD/DKK1/SERPINE1/NTRK2/ABI3BP/FOXD1/CES1/MFAP4/COMP/AOC3/ACTC1/FN1/COL14A1/LMO3/RGS4/ABCA6/SCRG1/TENM3/ASPA/PDK4/ECM2/PRG4/PTPRD/CRLF1/TRPC4/CILP/AEBP1/ZBTB16/DCLK1/HSPB7/CELF2/ARHGAP6/COL11A1/SEMA3G/PTGDS/CYP26B1/TGFB2/NPY1R/GEM/FXYD1/HLF/ACKR3/HSPA6/SERPINE2/ELOVL2/RRAD/GPX3/PEG3/CDKN1C/ADAM12/GREM1/LOX/DCN/RGS2/INHBA/CAPN6/CYP1B1/FGF2/C1QTNF3/BMP2/SERPINF1/TGM2/MAN1C1/PPP1R12…
Focal adhesion pi3kaktmtorsignaling pathway	Focal adhesion pi3kaktmtorsignaling pathway	298	0.4959913551312951	2.076641952243856	1e-10	5.2040404040404045e-9	3.779904306220096e-9	4114	tags=39%, list=22%, signal=31%	COL2A1/FGF10/FGF17/TNXB/NGFR/COL11A2/IRS4/COMP/TNR/FGF7/KIT/COL4A4/GHR/FN1/LAMA1/EFNA2/HIF3A/THBS2/COL5A1/PDGFRA/FGF19/TNN/THBS4/LAMB1/VTN/COL11A1/COL5A2/CHAD/COL3A1/KRAS/NOS1/TNC/PDGFRB/COL1A1/NGF/FGF1/ANGPT1/PDGFD/ITGA11/ANGPT4/CSF3R/FGF2/AKT3/GNG2/SLC2A4/LAMA4/IRS1/LIPE/FGF4/THBS1/ITGA10/KDR/LAMA2/FOXO1/VWF/FGF11/ITGA5/GNB3/COL1A2/COL6A2/IL7R/IRS2/CSF1R/ITGA7/PRL/COL4A6/FGF22/CREB3L3/PPP2R2C/E…
Stroma s up	Stroma s up	298	0.4952004571970501	2.0733305803556075	1e-10	5.2040404040404045e-9	3.779904306220096e-9	3474	tags=40%, list=19%, signal=33%	FGF10/FABP4/BACH2/BMPER/SORCS2/KCNA4/KIRREL3/AOC3/SELP/SVEP1/MEDAG/CCN5/CCDC80/CXCL12/PEAR1/SFRP2/TCF7L1/RGS4/PDK4/PDGFRA/GNAO1/MN1/WNT10B/SULF2/GALNT13/CYP26B1/EN1/LHX9/MMP23B/COL3A1/PDGFRB/TMEFF2/ONECUT2/COL1A1/ADAMTS2/SMOC2/CDKN1C/PLPP3/ADAM12/ROR2/RSPO2/PLAGL1/PLXND1/HTRA3/MMP2/CAPN6/FABP7/SERPINF1/NID2/LPL/PAPPA/GATA3/TGFBI/ELFN1/THSD7A/ARHGAP28/FAT4/FZD1/SP8/DOCK3/CD248/SNAI2/EYA4/PYGO1/COL…
Potassium channels	Potassium channels	102	0.5588244031891931	2.072303294451056	2.780019579216874e-7	7.421067809391364e-6	5.390220673092984e-6	4028	tags=49%, list=21%, signal=39%	KCNA1/KCNH5/KCNC2/KCNA4/KCND1/KCNJ15/KCNA6/KCNS1/KCNH7/HCN1/KCNJ10/KCNH1/KCNJ6/GNG2/KCNK13/KCNA5/GNB3/KCNN2/KCNG2/KCNMB2/HCN4/ABCC8/KCNV1/KCNK2/GNG4/KCNJ8/KCNA7/GABBR1/KCNN3/KCNB1/KCNK3/GNG11/KCNJ4/KCNJ9/KCNV2/KCNG1/KCNMB1/KCNA10/KCNAB1/ABCC9/KCNQ3/KCNAB2/KCNJ1/KCNAB3/KCNJ12/KCNA3/KCNK10/GNGT1/KCNJ5/GNG3
Hcc progenitor wnt up blocked by fzd8crd	Hcc progenitor wnt up blocked by fzd8crd	118	0.5473205128709399	2.069500470090298	3.897116747987458e-8	1.2735243153594068e-6	9.250120425593927e-7	3326	tags=42%, list=18%, signal=34%	SERPINE1/KIF26B/DPT/FN1/FBN1/CRISPLD2/THBS2/MEX3B/PI15/NAV1/COL5A2/TGFB2/VCAN/COL3A1/MDFI/TNRC18/ST6GAL2/DISC1/LZTS1/DCN/CYP1B1/CENPVL3/PRICKLE2/MYL2/KLHL4/MAGED4B/IGF2BP3/IGFBP5/EPYC/MOXD1/LUM/SPOCD1/BMF/PPP2R2C/RDH10/GNG4/SRPX2/DPYSL3/EPHB2/ZNF608/NKD2/CCDC3/TMEM158/ARID3A/RSPO3/KLF7/F3/SH3BP4/MRTFA
Hcmv infection 2hr up	Hcmv infection 2hr up	39	0.662662423397927	2.068935816021995	4.7151172859959616e-6	9.098233804288838e-5	6.608413937203092e-5	2693	tags=44%, list=14%, signal=37%	ATP1A2/ADH1B/MFAP4/NR4A3/ADCY1/ECM2/IGF2/NR4A1/CFD/SNED1/PTGDS/RGS2/ELANE/EGR1/COL21A1/SLC29A1/CHRDL1
Mammary tumorigenesis	Mammary tumorigenesis	30	0.6892333740465553	2.0686503293950524	3.220087942550625e-5	4.6470288739554116e-4	3.37532438029411e-4	3798	tags=63%, list=20%, signal=51%	FGF10/PTGIS/FOXC2/IGF2/EGR3/DPP10/LAMB1/PDGFRB/RSPO2/WNT1/FGF4/ERAS/KLF15/NKD2/SFMBT2/NOTCH4/RSPO3/AGAP1/RREB1
Heart atrium vs ventricle up	Heart atrium vs ventricle up	253	0.5003681479672671	2.0613553461442065	1e-10	5.2040404040404045e-9	3.779904306220096e-9	4350	tags=43%, list=23%, signal=34%	COL2A1/PLA2G2A/PLP1/SFRP1/CCL14/NTRK2/MYH11/PTGIS/GRIN2C/COMP/FBLN2/EFEMP1/DPT/CCN5/SPOCK1/PTH1R/FLRT2/HSPG2/PLA2G5/GNAO1/XYLT1/AEBP1/DDR2/SLIT3/CACNA2D2/CCN2/TIMP3/FEV/VCAN/EPHA4/ACTA2/GPX3/LILRA4/HEG1/TBX5/PDE4B/ROR2/EDNRA/PAM/EPB41L3/NR2F1/VIM/GPRASP1/AGTR1/VASH1/KCNA5/ZNF365/BASP1/LRRN3/DSC1/COL4A6/ABCC8/ALDH1A2/TGFB1/CDK14/FBLN1/CFH/BAMBI/PARM1/IL1RL1/PBXIP1/EPS8/TNK2/DPYSL3/EPHB2/TRPC1/FMOD…
Targets of ewsr1 flii fusion dn	Targets of ewsr1 flii fusion dn	328	0.48798563034763054	2.0605903729419652	1e-10	5.2040404040404045e-9	3.779904306220096e-9	4665	tags=45%, list=25%, signal=35%	DKK1/EYA1/ZNF423/KIF26B/C11orf96/CCDC80/DACT3/KLF2/FN1/FBN1/ATOH8/CLIP3/PTH1R/LMO3/COL5A1/ADAMTS5/ZCCHC24/SHISA2/SLC26A7/NUAK1/BOC/RBMS3/DCLK1/SULF2/XKR4/COL5A2/CYP26B1/TGFB2/HMCN1/COL3A1/MXRA8/GEM/C9/TNC/FSTL1/NLRP1/COL1A1/DLC1/IGDCC4/ANGPT1/LOX/IL17RD/SIPA1L2/IL11RA/ENPP2/LAMA4/VIM/ANGPTL2/PAPSS2/FRMD4A/EBF1/TFPI/FRMD6/COLEC12/FZD1/MLC1/FOXO1/TRO/TIMP2/ITM2C/MAGED4B/IGFBP5/SPARC/POSTN/MGP/NCOR2…
Cardiac conduction	Cardiac conduction	126	0.5394051835530675	2.0601119456048043	7.591035829264995e-8	2.3418572809804343e-6	1.7009853370965685e-6	3125	tags=42%, list=17%, signal=35%	ATP1A2/SCN4A/FXYD7/TRDN/CACNA1C/SLC8A3/KCND1/ATP1B2/CAMK2A/KCNIP1/KCNE4/SCN7A/SCN10A/CACNA2D2/PLN/SCN11A/SCN3A/SCN5A/NOS1/FXYD1/TBX5/ITPR1/KCNK12/GATA4/KCNK13/SCN2A/FGF11/ITPR3/NPR2/KCNE5/KCNK2/SCN8A/KCNIP3/CACNB2/ATP1A4/RYR1/TRPC1/CAMK2B/FXYD6/CACNG4/SLC8A2/KCNK3/KCNJ4/FGF12/SCN4B/ITPR2/KCNIP2/SLC8A1/KCNE2/ABCC9/SCN1B/ATP2A3/ORAI2
Hcc progenitor wnt up	Hcc progenitor wnt up	186	0.513191742363762	2.0597825762212754	1.4448262458788384e-9	6.05182505590876e-8	4.395684470773874e-8	3378	tags=42%, list=18%, signal=35%	SERPINE1/KIF26B/JAM2/DPT/CCDC80/FN1/SPOCK1/FBN1/CRISPLD2/THBS2/CPEB1/MEX3B/PI15/NAV1/LRRC15/COL5A2/TGFB2/VCAN/HMCN1/MRC2/COL3A1/MDFI/NANOS1/DACT1/ST6GAL2/COL1A1/DISC1/LZTS1/ADAM12/FAP/DCN/PDLIM3/MMP2/CYP1B1/CENPVL3/OLFML3/TGFBI/PRICKLE2/CARD11/MYL2/KLHL4/ITGA5/MAGED4B/IGF2BP3/COL1A2/IGFBP5/SPARC/EPYC/MOXD1/CSF1R/CTHRC1/CCN1/LUM/SPOCD1/BMF/PPP2R2C/RDH10/CLSTN2/GNG4/GLIPR1/SRPX2/DPYSL3/EPHB2/FBLIM1…
Adipogenesis by activated pparg	Adipogenesis by activated pparg	17	0.7900714000260485	2.0579197600456856	3.955618957470595e-5	5.557716891526694e-4	4.0367937948221236e-4	1697	tags=47%, list=9%, signal=43%	ADIPOQ/FABP4/AOC3/ADRB3/CFD/AGT/LIPE/PPARG
Npc hcp with h3k4me2 and h3k27me3	Npc hcp with h3k4me2 and h3k27me3	343	0.48556082782732374	2.056679371282666	1e-10	5.2040404040404045e-9	3.779904306220096e-9	2857	tags=37%, list=15%, signal=32%	ELAVL3/SCUBE3/PAX3/KCNA1/PODN/NKX2-1/SFRP1/UNC5D/PRPH/SNTG1/NKX2-4/FOXE1/ISL1/HOXD13/CBLN4/CACNA1I/SIM2/FOXC2/XKR7/LAMA1/AFF3/SCUBE1/TBX1/TMEM132E/ALK/CPEB1/SORCS3/SRCIN1/PAX2/CXCL14/IGF2/DPP10/NKX6-1/VAT1L/CACNA2D2/CYP26A1/WNT6/PENK/AMER3/SLC22A3/STUM/SYNDIG1L/HTR7/GALNT13/SLC18A3/XKR4/HCRTR1/FAM163B/FEV/HCN1/BMP6/SCN5A/C1QL1/FOXG1/ST6GAL2/SYT14/STXBP5L/KCNH1/CDH8/ADAMTS2/SMOC2/SHISA6/GATA2/NXPH…
Hcc progenitor wnt up ctnnb1 independent	Hcc progenitor wnt up ctnnb1 independent	22	0.7286651519033155	2.04446798780052	5.2528369991652295e-5	7.084454507774676e-4	5.145724864158831e-4	1910	tags=64%, list=10%, signal=57%	FN1/SPOCK1/FBN1/COL5A1/LRRC15/VCAN/MRC2/MDFI/FAP/MMP2/OLFML3/TGFBI/SPOCD1/PPP2R2C
Irs mediated signalling	Irs mediated signalling	47	0.6238279201692005	2.0398043312914145	1.5393385126338874e-5	2.4706143355419897e-4	1.7945067756725594e-4	2771	tags=43%, list=15%, signal=36%	FGF10/FGF17/FGF7/FGF23/FGF19/KLB/TLR9/KRAS/FGF1/FGF2/KL/IRS1/FGF4/IRS2/FGF22/PDE3B/FRS2/FGFR3/AKT2/FGFR1
Pancreatic cancer 19q13 amplification	Pancreatic cancer 19q13 amplification	32	0.6703836000828487	2.038983729080281	4.9572855364060966e-5	6.703395035056223e-4	4.8689460096487566e-4	4113	tags=66%, list=22%, signal=51%	SELENOV/LGALS13/FCGBP/PLEKHG2/MAP3K10/CLC/ZNF780A/LRFN1/ZNF780B/PLD3/SAMD4B/EID2B/C19orf47/ZNF546/ZFP36/AKT2/SUPT5H/DYRK1B/PAF1/MED29/DLL3
Kras targets up	Kras targets up	83	0.5647270690011238	2.0384582071157498	1.8962411382004062e-6	4.020343351443824e-5	2.9201374252988714e-5	4077	tags=51%, list=22%, signal=40%	SERPINE1/CCN5/SPOCK1/FLRT2/HSPG2/COL5A1/NUAK1/DKK3/TIMP3/TGFB2/ACKR3/SERPINE2/NLRP1/COL1A1/IGFBP3/TGFBI/SPARC/MSC/PMEPA1/GSDME/NPTX1/ADCY7/CHST3/GLIPR1/EPHB2/CDH4/SNAI1/PALLD/ULK1/ECE1/WIPF1/C1S/BMP1/SGK1/ADAM19/ACVR1B/CALD1/COL4A2/JUN/COL4A1/TNS1/GADD45B
Gpcrs class a rhodopsinlike	Gpcrs class a rhodopsinlike	238	0.4977159387299014	2.0370657902431746	1e-10	5.2040404040404045e-9	3.779904306220096e-9	2870	tags=37%, list=15%, signal=32%	NPY5R/PTGFR/HTR1E/GPR17/SSTR1/OR3A1/ADRA1A/MC5R/OR1G1/AVPR2/HTR5A/NPBWR2/FFAR1/MAS1L/NPFFR2/ADRB3/GPR50/OR8B8/HTR6/NMBR/NTSR1/ADRA2B/GPR45/OR1E1/OR3A2/HTR7/HCRTR1/RHO/ADRA2A/OR3A3/MLNR/NPY1R/FFAR3/DRD1/GPR15/ACKR3/HTR2A/CCKAR/EDNRA/HRH2/BDKRB1/MC3R/GPR21/SSTR3/OR1C1/OR2B2/HTR1D/OPRL1/NTSR2/ADRB2/GPR68/AGTR1/OR2H2/OR2AG1/NPBWR1/P2RY12/PTGER4/OR10A5/ADORA2A/APLNR/AVPR1B/GPR20/OR2S2/OR8D2/OR6B1/GPR8…
Diseases associated with glycosaminoglycan metabolism	Diseases associated with glycosaminoglycan metabolism	41	0.6441234806183737	2.036156077078551	1.5515207059267857e-5	2.482433129482857e-4	1.8030912420953656e-4	2301	tags=44%, list=12%, signal=39%	NCAN/OMD/OGN/HSPG2/CSPG4/GPC6/BGN/VCAN/GPC2/DCN/KERA/ACAN/PAPSS2/LUM/GPC1/CHST3/AGRN/FMOD
Bladder cancer high recurrence	Bladder cancer high recurrence	49	0.6204168597019315	2.0329196039077444	2.5590966746948882e-5	3.7868700833549733e-4	2.750556380011223e-4	3780	tags=49%, list=20%, signal=39%	ABI3BP/PRRX1/NR4A1/AEBP1/COL5A2/VCAN/HTRA3/LAMA4/NID2/PAPPA/COL1A2/SPARC/IL7R/MGP/NDRG2/MYLK/ANXA6/FYN/VCAM1/ADAM19/UBR4/COL18A1/MICAL2/COL4A2
Suz12 targets dn	Suz12 targets dn	312	0.4818058236911545	2.027370922293167	1e-10	5.2040404040404045e-9	3.779904306220096e-9	4967	tags=45%, list=26%, signal=34%	FLNC/SOX11/BACH2/PRTG/EFEMP1/GHR/ACTC1/FN1/HMGA2/TENM3/GAP43/POU3F1/COL5A1/VGLL3/PXDN/PHLDB2/CRLF1/TMCC3/MMP14/NUAK1/COL11A1/DOCK11/RHOBTB3/TGFB2/VCAN/GLI3/COL3A1/ACTA2/STMN2/CAVIN1/CDK6/LHFPL6/COL1A1/SH3PXD2A/FILIP1L/TTYH3/PDLIM3/NEFL/IGFBP4/CYP1B1/GNG2/CCN4/BMP2/IGFBP3/IRS1/VIM/THBS1/AXL/DUSP1/BMP4/COLEC12/CAV1/FZD2/TIMP2/WNT4/COL1A2/IGFBP5/PROM1/SYT11/IRS2/CCN1/COL4A5/DPYSL2/NT5E/RDH10/CNN1/ER…
Mir5093p alteration of yap1ecm axis	Mir5093p alteration of yap1ecm axis	17	0.7763814933388031	2.0222612999572243	8.33576943693495e-5	0.001039851916200699	7.552863603492737e-4	2322	tags=65%, list=12%, signal=57%	FN1/THBS2/COL5A1/GPC6/COL3A1/COL1A1/EDNRA/SNAI2/SPARC/TWIST1/TEAD1
Prefrontal cortex 22q11 deletion up	Prefrontal cortex 22q11 deletion up	194	0.5025365650344995	2.0188663871073644	1.2499962562362973e-9	5.3222981091978544e-8	3.865799644123565e-8	6204	tags=57%, list=33%, signal=39%	OPCML/CAMK2A/ZBTB16/PLPPR5/TNRC18/SLC6A1/LIN7A/BSN/TTYH3/SEMA6B/PAQR8/GRIA1/SYN2/NTM/TIMP2/ZEB2/OR51E2/TMEM178B/ILDR2/ACVR1C/SP4/KIAA0513/NUMBL/CYGB/PPP2R2C/ZNF804A/TCF4/SKI/SPOCK2/TMOD2/PLXNC1/PTPRJ/PRRC2B/CYRIA/PYGM/SPTBN1/DLG4/CDK5R1/IGF1R/FNDC3A/SOBP/SLC8A1/DGKD/MARCKS/GPRIN3/SMARCC2/ZNF445/DLGAP2/KLF9/TNFRSF19/ATN1/KLHL24/STK4/SLC17A7/NPTXR/MAPRE2/CNR1/TRIM8/GSK3B/NRXN3/KIF5C/MEF2C/POM121/PB…
Soft tissue tumors pca1 dn	Soft tissue tumors pca1 dn	76	0.5703038278967066	2.0183236518188488	1.584190300981854e-6	3.502896322171035e-5	2.544294791050595e-5	2085	tags=38%, list=11%, signal=34%	COL2A1/COL9A3/ADIPOQ/SOX11/CUX2/SFRP1/NTRK2/CACNA1G/NELL1/NPTX2/MAGEA9/SEMA6A/CRLF1/WIF1/GPD1/RBP4/MDFI/PEG3/CAPN6/ACACB/LPL/TRO/ITM2C/MAGED4B/COL4A5/LRRN2/EFNB3/FGFR3/CTAG1B
Unstable aterosclerotic plaque dn	Unstable aterosclerotic plaque dn	42	0.635208952375417	2.017482793030184	2.5799522501117925e-5	3.7868700833549733e-4	2.750556380011223e-4	4309	tags=62%, list=23%, signal=48%	MYH11/PTGIS/ACTC1/LMOD1/LHFPL6/GRK5/PAM/RASL12/FIBIN/CPED1/PMEPA1/JAM3/EGFR/SUSD5/FMOD/MAP1B/ADCY9/MYLK/KCNMB1/GJA1/SOD3/PKD2/NIBAN1/PFKM/TNS1/CRIM1
Cmv all dn	Cmv all dn	118	0.5332829886729736	2.016422497963488	2.1922066782252456e-7	5.996312077538787e-6	4.355363157006045e-6	4450	tags=49%, list=24%, signal=38%	ADH1B/SERPINE1/PTGIS/FGF7/EFEMP1/CXCL12/THBS2/PDGFRA/IGF2/ZNF521/CFD/DDR2/TIMP3/MN1/COL5A2/ADRA2A/VCAN/COL3A1/ACTA2/ACKR3/COL1A1/LOX/CYP1B1/CDH11/IGFBP3/LAMA4/THBS1/BMP4/BCL2/COL1A2/MBL2/IGFBP5/COL6A2/POSTN/FBLN1/HSD17B2/ENG/AKR1C1/HIVEP2/MYLK/RUNX1/TRAM2/CNN2/IGF1R/MARCKS/LAMB2/MITF/TP53BP1/ABL1/TCF7L2/GAS1/ID2/XPC/CCND1/FLNA/TGFBR3/TAGLN/NR3C1
Resistance to neoplastic transfromation	Resistance to neoplastic transfromation	50	0.6129863550928609	2.0160739862030908	1.0525342478559816e-5	1.796663171847596e-4	1.3049888803363444e-4	4588	tags=56%, list=24%, signal=42%	FBLN2/CCN5/CXCL12/FBN1/CCN2/BGN/COL5A2/FSTL1/PDGFRB/COL1A1/PCOLCE/SLC16A7/TGFB3/ID3/ST3GAL5/IL1RL1/LTBP2/TGFB1I1/CACNB3/AMOTL2/LAMB2/P3H1/SELENOP/MMP11/TAGLN/SDC2/FBLN5/APP
Voltage gated potassium channels	Voltage gated potassium channels	43	0.6272417155241143	2.0111115662609222	2.4067184172281912e-5	3.573317949729003e-4	2.5954448576509087e-4	3781	tags=51%, list=20%, signal=41%	KCNA1/KCNH5/KCNC2/KCNA4/KCND1/KCNA6/KCNS1/KCNH7/KCNH1/KCNA5/KCNG2/KCNV1/KCNA7/KCNB1/KCNV2/KCNG1/KCNA10/KCNAB1/KCNQ3/KCNAB2/KCNAB3/KCNA3
Ewing sarcoma progenitor up	Ewing sarcoma progenitor up	427	0.4647834981634932	2.0073625148056755	1e-10	5.2040404040404045e-9	3.779904306220096e-9	4268	tags=42%, list=23%, signal=33%	FABP4/GPR17/NGFR/UGT3A1/BRINP1/OPCML/TRDN/CES1/MFAP4/LRFN5/ADRB3/GABRQ/KIT/COL4A4/NPTX2/GDF7/TSPAN11/EBF2/TCF7L1/LMO3/SV2B/CD36/FLRT2/ALK/KCNE4/TMEM132B/CYYR1/ZBTB16/LRATD1/MMP8/COL11A1/PTGDS/CYP26B1/NPY1R/NRK/GFRA2/HMCN1/EPHA4/ENPP1/JCAD/CCND2/PKP1/PRSS35/NOS1/TNC/TMEFF2/CLCA2/GNA14/GPX3/TOX2/PEG3/IGDCC4/GATA2/EDNRA/SCNN1G/GRK5/BCL11B/PREX1/RGS2/SAMD5/MMP9/ANKRD1/CDH11/MAPT/NR2F1/ACACB/OLFML3/LP…
Crosslinking of collagen fibrils	Crosslinking of collagen fibrils	18	0.7611997178893705	2.0064562624764846	5.330141200682795e-5	7.138202858174824e-4	5.184764457504802e-4	4017	tags=89%, list=21%, signal=70%	COL4A3/COL4A4/TLL1/PXDN/COL1A1/PCOLCE/LOX/COL1A2/COL4A6/COL4A5/LOXL3/LOXL2/LOXL1/BMP1/COL4A2/COL4A1
Neuroactive ligand receptor interaction	Neuroactive ligand receptor interaction	265	0.48577614087430543	2.0055086333842196	1e-10	5.2040404040404045e-9	3.779904306220096e-9	3335	tags=40%, list=18%, signal=33%	NPY5R/GCGR/PTGFR/HTR1E/SSTR1/CTSG/ADRA1A/MC5R/GLP2R/AVPR2/GRIN2C/HTR5A/NPBWR2/GRIN2B/NPFFR2/GABRA1/ADRB3/CHRND/GABRQ/GPR50/GABRA4/GHR/P2RX2/PTH1R/HTR6/NMBR/NTSR1/GABRG2/LEP/ADRA2B/GRID1/HTR7/HCRTR1/ADRA2A/MLNR/NPY1R/DRD1/HTR2A/CGA/CRHR2/GABRA3/CCKAR/EDNRA/HRH2/BDKRB1/MC3R/GRM2/SSTR3/GRIA1/GRM3/GRM1/HTR1D/OPRL1/NTSR2/ADRB2/AGTR1/NPBWR1/GRIK2/P2RX6/CHRNG/PTGER4/GRIK1/CALCRL/ADORA2A/PRL/APLNR/C5AR1/…
Neural crest stem cell up	Neural crest stem cell up	144	0.5150642200743154	2.0024399308650214	8.995634440842583e-8	2.726206390542411e-6	1.9801535874424388e-6	3305	tags=42%, list=18%, signal=35%	ATP1A2/SLIT1/PAX3/NGFR/TRIL/HOXA2/COL14A1/SLC17A6/SCRG1/GAP43/PDGFRA/ZCCHC24/LAMB1/CYP26A1/BGN/NEFM/COL3A1/SCN3A/MDFI/DACT1/STMN2/LZTS1/DLC1/EDNRA/FAP/DCN/NEFL/SCG3/L1CAM/NR2F1/NRXN1/RASL12/NHLH2/TGFBI/SNAI2/COL1A2/KCNN2/ZEB2/IGFBP5/POSTN/BMP5/ELK3/MOXD1/LRRN3/LUM/KLHL41/PCDH8/ST18/ROR1/TMEM204/AKR1C1/FST/RHOB/STMN4/SOX10/CHN2/MSTN/SGCD/BCHE/ITGA4/MITF
Cardiac hypertrophy	Cardiac hypertrophy	34	0.646945477726572	2.0006696841130545	7.411072868161398e-5	9.404395915459982e-4	6.830791819111686e-4	3448	tags=53%, list=18%, signal=43%	ASPN/EFEMP1/FN1/FBN1/OGN/COL5A2/ACTA2/FSTL1/PDLIM3/NID1/ENPP2/IGFBP3/LPL/TUBA1A/LOXL1/LTBP3/ARID5B/OSBPL8
Temporal response to progesterone cluster 1	Temporal response to progesterone cluster 1	67	0.5748654209598437	2.0000867234006714	2.1422550509712688e-5	3.236626986100873e-4	2.3508926396674986e-4	4077	tags=52%, list=22%, signal=41%	TNXB/INMT/PDK4/CXCL14/NR4A1/PEG3/C1QTNF3/IGFBP3/ID3/TFCP2L1/TNS2/TGFBI/DUSP1/BMP4/IRS2/MSC/KCNK2/CFH/LRP6/PARM1/LEPR/ITPR2/TXNIP/LTBP1/IGF1R/HSPA2/FAM20C/CITED2/FOXO3/KLF9/MITF/MYCN/HP/KRT7/GADD45B
Pi3kakt signaling pathway	Pi3kakt signaling pathway	323	0.4741704306730802	1.9992715231885154	1e-10	5.2040404040404045e-9	3.779904306220096e-9	4147	tags=38%, list=22%, signal=30%	COL2A1/COL9A3/FGF10/FGF17/TNXB/NGFR/NTRK2/IFNA1/COMP/TNR/FGF7/COL4A3/KIT/COL4A4/GHR/FN1/LAMA1/EFNA2/THBS2/FGF23/PDGFRA/FGF19/IGF2/TNN/THBS4/LAMB1/VTN/CHAD/KRAS/CCND2/TNC/PDGFRB/CDK6/COL1A1/NGF/FGF1/ANGPT1/COL9A2/PDGFD/COL6A3/ITGA11/ANGPT4/CSF3R/FGF2/AKT3/GNG2/LAMA4/IRS1/FGF4/THBS1/ITGA10/IL6/KDR/LAMA2/BCL2/VWF/FGF11/ITGA5/GNB3/COL1A2/COL6A2/IL7R/CSF1R/ITGA7/PRL/COL4A6/COL4A5/CCNE1/FGF22/CREB3L3/P…
Mirna targets in ecm and membrane receptors	Mirna targets in ecm and membrane receptors	22	0.7125135831106874	1.9991503748159656	1.1291973030265508e-4	0.001331264188831302	9.669508399998528e-4	4608	tags=86%, list=25%, signal=65%	TNXB/FN1/THBS2/COL5A1/COL5A2/COL3A1/COL6A3/ITGA11/LAMA4/THBS1/COL1A2/COL6A2/COL6A1/LAMB2/LAMC1/COL4A2/COL4A1/SDC2/ITGB5
Neovascularisation processes	Neovascularisation processes	37	0.6433521916945352	1.9979145916373298	2.157724255387071e-5	3.25046648062988e-4	2.3609448223764351e-4	3413	tags=49%, list=18%, signal=40%	KIT/CXCL12/TGFB2/SMAD9/ANGPT1/TGFB3/MMP9/KDR/EPHB4/NOTCH3/TGFB1/ACVRL1/NOTCH1/EPHB2/DLL4/NOTCH4/KITLG/REL
Colorectal adenoma dn	Colorectal adenoma dn	281	0.4796100810670273	1.997526186718634	1e-10	5.2040404040404045e-9	3.779904306220096e-9	3368	tags=44%, list=18%, signal=37%	ATP1A2/ADH1B/ANGPTL1/FABP4/RFX6/PLP1/SFRP1/CTSG/XPNPEP2/MYH11/LYVE1/ABI3BP/ASPN/MFAP4/AOC3/JAM2/EFEMP1/DPT/GHR/CCDC80/CXCL12/FN1/COL14A1/LAMA1/AFF3/SV2B/LMOD1/ASPA/OGN/CD36/FLRT2/PI15/SCN7A/TMCC3/DPP10/RAB3B/ABCA8/ZBTB16/GPC6/UNC5C/VSTM2A/BRINP3/BMP3/XKR4/CCL21/F13A1/FEV/CHAD/FXYD1/C7/ACKR1/GPX3/RTN1/RSPO2/SCNN1G/ADCY2/EPHA7/PLAC9/TMEM200A/NAP1L3/OSR1/EPB41L3/L1CAM/NEUROD1/SCG2/NRXN1/DUSP1/COLEC1…
Fgf pathway	Fgf pathway	54	0.5968579542248997	1.9944482979800837	1.6293276124474273e-5	2.593937483322071e-4	1.8840813487271092e-4	4496	tags=56%, list=24%, signal=42%	FGF17/CAMK2A/FGF23/FGF19/KLB/FGF1/IL17RD/MMP9/FGF2/RUNX2/FGF4/PLCG1/FRS2/FGFR3/FGFR1/SSH1/STAT5B/SPRY2/HGF/GAB1/FOS/BGLAP/PLAU/JUN/PTPN11/PLAUR/NCAM1/CDH2/SDC2/PAK4
Targets of pax foxo1 fusions up	Targets of pax foxo1 fusions up	256	0.48403547951356996	1.9937816413737832	2.426767479604354e-10	1.1576579680482991e-8	8.408536442488771e-9	4052	tags=41%, list=22%, signal=32%	MAGEL2/FBN2/DKK1/EYA1/NELL1/MYOD1/COL14A1/TCF7L1/ALK/COL5A1/MMP16/PRRX1/ADAMTS5/PXDN/FXYD5/DENND2A/MN1/NEBL/SCN3A/CCND2/ACKR3/SERPINE2/MME/STATH/HEG1/PDGFD/GATA2/INHBA/NID1/ID3/THBS1/GALNT10/DUSP1/BMP4/FZD1/CAV1/SNAI2/FOXO1/COL6A2/ST3GAL5/DKK2/BMP5/IRS2/ELK3/CYBRD1/KLF4/CCN1/GSDME/PTPRU/JAKMIP2/ANK1/TMEFF1/PGF/P3H2/VSTM4/KCNN3/CAMK2N1/CDH4/PLXNC1/CHST11/FST/SATB1/CYRIA/HDAC5/SULF1/MSX2/RHOB/TGFB1…
Focal adhesion	Focal adhesion	213	0.4915908919412838	1.993246282747001	2.3465409873811053e-9	9.454107918078046e-8	6.866899650369291e-8	5301	tags=50%, list=28%, signal=36%	COL2A1/FLNC/TNXB/COL11A2/COMP/TNR/COL4A4/FN1/LAMA1/THBS2/COL5A1/PDGFRA/TNN/THBS4/LAMB1/VTN/COL11A1/COL5A2/CHAD/COL3A1/CCND2/TNC/PDGFRB/COL1A1/ACTN3/PDGFD/COL6A3/ITGA11/AKT3/MYL10/MAPK10/LAMA4/PPP1R12B/THBS1/ITGA10/CAV1/KDR/LAMA2/BCL2/VWF/MYL2/ITGA5/COL1A2/COL6A2/ITGA7/COL4A6/EGFR/PGF/ITGA8/TNK2/SHC2/PIK3CD/IGF1/PAK3/AKT2/MYLK/DOCK1/COL6A1/VEGFD/FYN/IGF1R/PIK3R5/COL6A6/PXN/HGF/LAMB2/TLN1/ITGA4/LAM…
Ion homeostasis	Ion homeostasis	54	0.5950676599494995	1.9884658873492453	1.7571162600159162e-5	2.734943495952266e-4	1.986499699270658e-4	3502	tags=44%, list=19%, signal=36%	ATP1A2/FXYD7/TRDN/SLC8A3/ATP1B2/CAMK2A/PLN/NOS1/FXYD1/ITPR1/ITPR3/ATP1A4/RYR1/TRPC1/CAMK2B/FXYD6/SLC8A2/ITPR2/SLC8A1/ABCC9/ATP2A3/ORAI2/CLIC2/CASQ2
Aml cluster 9	Aml cluster 9	34	0.6418749092779877	1.9849890233378196	9.722186150899286e-5	0.0011757911513951436	8.540245062131695e-4	2213	tags=44%, list=12%, signal=39%	MYH11/CLIP3/MN1/CLIP2/CD1C/CLEC10A/RUNX3/PAPSS2/TGFBI/COLEC12/SPARC/BAHCC1/NT5E/RPS6KA2/ST18
Response to leukotriene and thrombin	Response to leukotriene and thrombin	36	0.6368728307251659	1.982309091248172	3.996477371729662e-5	5.579905533645316e-4	4.0529102999569105e-4	3447	tags=58%, list=18%, signal=48%	NR4A3/KLF2/PDK4/NR4A1/EGR3/SELE/GEM/RGS2/NEDD9/BMP2/DUSP1/KLF4/CCN1/EGR1/APOLD1/PTGS2/ZFP36/CITED2/SIK1/F3/ARID5B
Downstream signaling of activated fgfr1	Downstream signaling of activated fgfr1	30	0.6598919522016058	1.9805856124935546	1.5406454182726508e-4	0.0017143423747172132	0.0012451959672523073	2076	tags=47%, list=11%, signal=42%	FGF10/FGF17/FLRT1/FLRT2/FGF23/KRAS/FGF1/FGF2/KL/FGF4/FGF22/PLCG1/FRS2/FLRT3
Insulin receptor signalling cascade	Insulin receptor signalling cascade	52	0.5996185129052429	1.978028937453172	2.7426577380580502e-5	4.014253598430419e-4	2.915714192223795e-4	2771	tags=38%, list=15%, signal=33%	FGF10/FGF17/FGF7/FGF23/FGF19/KLB/TLR9/KRAS/FGF1/FGF2/KL/IRS1/FGF4/IRS2/FGF22/PDE3B/FRS2/FGFR3/AKT2/FGFR1
Tp63 targets	Tp63 targets	344	0.46599040669107294	1.9764520431811605	1e-10	5.2040404040404045e-9	3.779904306220096e-9	4479	tags=41%, list=24%, signal=32%	COL9A3/ELAVL3/NGFR/KIT/SHISAL1/CRISPLD2/ADCY1/CXCL14/IGF2/ZCCHC24/PLIN4/NUAK1/FOXP4/COL8A2/CELF2/ST8SIA2/EPHA4/SMAD9/HSPA6/NLRP1/COL1A1/ADAMTS10/DLC1/ZIC2/CDKN1C/PLPP3/PLA2G4F/SASH1/FRY/GRK5/NEFL/SIPA1L2/WFDC5/EPB41L3/BMP2/IGFBP3/MAN1C1/GFPT2/RUNX3/ANGPTL2/SOX8/CGNL1/KSR1/FOXF1/CABP7/ELFN1/FZD1/APC2/NOTCH3/SLIT2/FAM43A/ZNF750/HR/ARX/MOXD1/APAF1/TSHZ3/ACVR1C/EGR1/RCOR2/CYGB/PPP2R2C/NPTX1/BAMBI/GLI…
Adipogenesis dn	Adipogenesis dn	84	0.5466729009093677	1.9761197111085589	1.0564317115809365e-5	1.796663171847596e-4	1.3049888803363444e-4	1747	tags=33%, list=9%, signal=30%	FGF7/DPT/CXCL12/FN1/THBS2/OGN/MMP14/CCN2/TIMP3/VCAN/CCND2/FSTL1/PDGFRB/LOX/MMP2/CAPN6/CCN4/OSR1/OLFML3/THBD/THBS1/PDPN/RNASE4/TIMP2/XDH/GAS7/POSTN/CCN1
Response to tgfb1 c2	Response to tgfb1 c2	21	0.710420135806339	1.973507296250125	2.4076583409247485e-4	0.0025109829498875112	0.0018238281274211552	1592	tags=43%, list=8%, signal=39%	LRP1/FN1/MMP14/MMP3/TIMP3/PCDHGC3/COL3A1/COL6A3/COL1A2
Breast cancer progression dn	Breast cancer progression dn	72	0.5629894223358134	1.9716112662606367	5.609238607803817e-6	1.0432778811337642e-4	7.577747767715208e-5	2047	tags=33%, list=11%, signal=30%	CIDEC/DPT/GHR/CCDC80/CXCL12/COL5A1/LAMB1/PENK/ZEB1/COL3A1/FSTL1/COL1A1/COL6A3/ANGPTL2/THBD/TGFBI/VWF/HTRA1/KLF4/MRC1/MAN1A1/LUM/SRPX/HEPH
Primary focal segmental glomerulosclerosis fsgs	Primary focal segmental glomerulosclerosis fsgs	72	0.5628897177089821	1.9712620967065386	5.609238607803817e-6	1.0432778811337642e-4	7.577747767715208e-5	4424	tags=47%, list=24%, signal=36%	DKK1/KIRREL3/COL4A3/COL4A4/PAX2/NPHS2/VTN/MME/CDKN1C/WNT1/VIM/COL4A5/LMX1B/TGFB1/PTPRO/PLCG1/NOTCH1/LRP6/AGRN/CR1/CAMK2B/DNM1/FYN/UTRN/LAMB2/TLN1/ITGB1/LAMA5/TLR4/PARVA/FAT1/PLAUR/PLCE1/CDH2
White fat cell differentiation	White fat cell differentiation	31	0.6488677679397609	1.9675662506391	1.1833972300503814e-4	0.0013825085100271123	0.0010041716560040832	4867	tags=61%, list=26%, signal=45%	ZNF423/KLF2/TCF7L1/WNT10B/GATA2/GATA3/EBF1/FOXO1/PPARG/KLF4/KLF15/STAT5B/STAT5A/EGR2/TLE3/NR3C1/IRF4/NR2F2/MECOM
Tgfb1 targets 10hr up	Tgfb1 targets 10hr up	194	0.4880281797564383	1.9605810932460705	1.5606943822991975e-8	5.432903687571261e-7	3.9461369339072885e-7	4555	tags=46%, list=24%, signal=35%	SERPINE1/FOXC2/CRISPLD2/ELN/PRG4/CXCL14/TMCC3/CSPG4/THBS4/NUAK1/CCN2/TIMP3/ELAVL2/COL8A2/NEBL/ALDH1A3/ENPP1/PKP1/TNC/GAREM2/NGF/ADAM12/INHBA/MMP9/FGF2/ANKRD1/GFPT2/PAPSS2/IL11/IL6/HIVEP3/ITGA5/RASL11B/GJB2/ALDH1A2/TGFB1/PMEPA1/CNN1/PPP1R13L/FSTL3/GREM2/PTGS2/BTBD11/LRRC8C/CHST11/WNT9A/SNAI1/RGS16/MEGF10/IL18R1/ARG1/STMN4/RUNX1/ENTPD7/SEMA7A/LMO1/HSPA2/KLHL29/SPHK1/HIP1R/CSRNP1/SOCS2/LPIN3/DUSP5/O…
Stromal stimulation up	Stromal stimulation up	54	0.5866309101017873	1.960273817100127	3.403166579426455e-5	4.8568183427160933e-4	3.527702927499941e-4	2786	tags=50%, list=15%, signal=43%	SERPINE1/THBS2/CCN2/VCAN/ACTA2/COL6A3/LOX/RGS2/IGFBP4/FOSB/TGM2/IGFBP3/LAMA4/ID1/TGFBI/DUSP1/IL6/NOTCH3/COL1A2/SPARC/BASP1/LUM/FSCN1/TSC22D3/SULF1/SPTBN1/COL6A1
Calcium signaling pathway	Calcium signaling pathway	177	0.48986416773156044	1.959989995961338	6.733598310976979e-8	2.102515060494145e-6	1.5271414351210946e-6	3574	tags=40%, list=19%, signal=33%	PTGFR/ADRA1A/PDE1C/GRIN2C/HTR5A/CACNA1G/CACNA1C/CACNA1I/ADRB3/SLC8A3/P2RX2/CAMK2A/HTR6/ADCY1/NTSR1/PDGFRA/HTR7/PLN/CALML5/CACNA1H/DRD1/NOS1/HTR2A/PDGFRB/GNA14/CCKAR/EDNRA/HRH2/BDKRB1/ADCY2/ITPR1/GRM1/ADRB2/AGTR1/P2RX6/ITPR3/ADORA2A/PDE1B/AVPR1B/PLCG1/EGFR/ADCY7/RYR1/TRPC1/NOS2/HTR4/CAMK2B/BDKRB2/SLC8A2/PLCG2/GRIN2D/PLCD4/ADCY9/PLCZ1/MYLK/ITPR2/ADRB1/F2R/PTGER3/SLC8A1/GNAL/SPHK1/ADRA1D/ATP2A3/P2RX…
Ovarian cancer lmp dn	Ovarian cancer lmp dn	195	0.4865473662326636	1.9571784334780946	3.196930767053835e-8	1.06261853624912e-6	7.718226741511974e-7	4490	tags=46%, list=24%, signal=35%	FLNC/EFEMP1/CCDC80/FLRT2/COL8A1/DDR2/TIMP3/CELF2/DOCK11/TGFB2/OLFML1/GLI3/C9/NLRP1/PDGFD/DCN/LAMA4/NR2F1/FZD7/GPRASP1/LIX1L/CTSK/NELL2/CAV1/KDR/PLEKHM3/SLIT2/HTRA1/BASP1/HBB/GSDME/KIF1B/PLSCR4/ZNF483/ARMCX1/FER/CDON/FBXL7/TCF4/DSE/DPYSL3/SPOCK2/NDN/SRGAP2/MAF/DAB2/SULF1/HDAC4/CPVL/TAOK1/SOX6/ZBTB20/KPNA5/SMIM10L2A/GPRASP2/CAP2/TMEM45A/ZNF532/C1S/ZFPM2/PLPP1/FRAS1/WASF3/WNT2B/MYH10/ARNT/CALD1/SH3B…
Stem cell adipose vs bone dn	Stem cell adipose vs bone dn	107	0.5255515678901406	1.95514544313973	3.5843004638851793e-6	7.129851733566195e-5	5.1786986990903525e-5	2911	tags=43%, list=16%, signal=37%	PODN/MYH11/PTGIS/ASPN/MFAP4/JAM2/CCDC80/FBN1/SFRP2/RGS4/KCNE4/MYH2/NUAK1/LAMB1/CELF2/COL5A2/DOCK11/EN1/ACKR3/IRAG1/LOX/CDH11/LAMA4/FZD7/ID1/GATA3/IGF2BP3/POSTN/FBLN1/ASAP3/KDM5B/TCF4/HYAL1/GPR87/NDN/AKR1C1/DAB2/LTBP2/SLC29A1/IGF1/LOXL2/AKAP12/FAM234B/TXNIP/HSPA2/SLC22A23
Gpcrs class b secretinlike	Gpcrs class b secretinlike	23	0.690865822119435	1.953349821544015	3.464221055034665e-4	0.0032990142098962283	0.0023962069949699846	2652	tags=52%, list=14%, signal=45%	GCGR/ADGRL3/GLP2R/PTH1R/CRHR2/CALCRL/CALCR/ADGRE2/VIPR2/ADGRL2/ADGRL4/CRHR1
Epithelial to mesenchymal transition in colorectal cancer	Epithelial to mesenchymal transition in colorectal cancer	158	0.49288274840040797	1.9449699039159514	3.566495708299022e-7	9.187292944578282e-6	6.6731011805279075e-6	4113	tags=44%, list=22%, signal=34%	CLDN19/COL4A3/COL4A4/FOXC2/FN1/WNT6/WNT10B/VTN/TGFB2/ZEB1/KRAS/PKP1/DLL1/WNT8A/TGFB3/MMP2/MMP9/CLDN5/AKT3/WNT1/WNT9B/LATS2/FZD7/ID1/PROX1/FZD1/FZD2/SNAI2/NOTCH3/PKD1/CLDN11/WNT4/ITGA5/CLDN15/ZEB2/SPARC/TWIST1/COL4A6/COL4A5/TGFB1/WNT3A/NOTCH2/CLDN14/NOTCH1/LRP6/WNT7B/WNT9A/DLL4/PIK3CD/SNAI1/CLDN20/AKT2/FZD10/TWIST2/CLDN9/CLDN18/NOTCH4/MEF2D/WNT2B/PIK3CB/FZD8/CLDN8/COL4A2/GSK3B/TGFBR2/COL4A1/WNT5A/…
Npc hcp with h3k4me2	Npc hcp with h3k4me2	486	0.44676550139479065	1.9435529552039792	1e-10	5.2040404040404045e-9	3.779904306220096e-9	3581	tags=35%, list=19%, signal=29%	COL2A1/COL9A3/TMEM151B/FLNC/HAPLN4/LTBP4/SLC16A12/BRINP1/CACNA1G/COMP/FBLN2/GPR50/SLC8A3/KIAA1755/COL16A1/NPTX2/MARCHF11/TCERG1L/ZMAT4/GDF7/NKX6-2/SPOCK1/PEAR1/EFNA2/HTR6/EBF2/SLC1A6/SHE/NEURL1/ADAMTS5/CRLF1/ALX4/AEBP1/SLIT3/HIC1/CLMP/ADAMTSL4/PLPPR5/MN1/ELAVL2/BMP3/MTUS2/CHD5/LHX9/NRK/SMAD9/ALDH1A3/RBP4/CH25H/RADIL/WNK4/BARX1/KCNJ10/ELOVL2/ADAMTS19/ONECUT2/C19orf12/RRAD/CDKN1C/ROR2/RTN1/LGI2/PLA…
Imatinib resistance up	Imatinib resistance up	20	0.7103972594333832	1.9401210634230557	3.574513634243859e-4	0.0033915090688074333	0.002463389739214291	2067	tags=50%, list=11%, signal=45%	SPOCK1/CXCL14/DKK3/SCN3A/SERPINE2/GREM1/AXL/CYTL1/HSD17B2/BAMBI
Adipogenesis early dn	Adipogenesis early dn	35	0.6239358860510875	1.9395864947458303	1.1862796357289355e-4	0.0013827404260804243	0.0010043401059815116	2558	tags=46%, list=14%, signal=40%	COL9A3/SERPINE1/MYH11/ABI3BP/RGS4/THBS2/TIMP3/SERPINE2/LOX/ACTG2/POSTN/CCN1/NT5E/GLIPR1/EDIL3/RAI14
Osteoblast differentiation and related diseases	Osteoblast differentiation and related diseases	116	0.5139555152651033	1.9392738161561633	1.5452797652328837e-6	3.431586788999921e-5	2.4924998028143836e-5	3598	tags=39%, list=19%, signal=32%	FGF10/MAPK4/FGF7/MYOD1/WNT6/WNT10B/GLI3/SMAD9/DLL1/WNT8A/FGF1/FGF2/BMP2/MAPK10/WNT1/RUNX2/FGF4/WNT9B/FZD7/BMP4/FZD1/FZD2/NOTCH3/WNT4/PPARG/GLI2/WNT3A/NOTCH2/NOTCH1/FGFR3/PRKD1/LRP6/WNT7B/WNT9A/DLL4/PIK3CD/FGFR1/FZD10/MAPK7/PIK3R5/NOTCH4/WNT2B/PIK3CB/PIK3R6/FZD8
Liver cancer recurrence up	Liver cancer recurrence up	104	0.5202358882764397	1.938268510988775	9.892298125913314e-6	1.710238924318973e-4	1.2422154658291005e-4	4326	tags=47%, list=23%, signal=36%	SEMA6A/CCN2/COL11A1/TGFB2/GEM/CCND2/COL1A1/ANOS1/COL9A2/PLAGL1/COL6A3/LOX/RGS2/ENPP2/MICAL1/IGFBP3/LAMA4/BHLHE41/FZD1/SLIT2/BCL2/COL1A2/ZEB2/GAS7/POSTN/MGP/DPYSL2/TGFB1/NOTCH2/RGS1/DPYSL3/DAB2/FGD6/FGFR1/EPHA3/MARCKS/LAMA5/PLAU/TPBG/PFKM/MEF2C/PMP22/DBN1/PDGFA/ENO2/FLNA/PLAUR/PLCE1/CCND3
Glypican 1pathway	Glypican 1pathway	27	0.6616284632724048	1.9379867649076012	1.193986117205237e-4	0.0013885815972553906	0.0010085827840476697	5189	tags=74%, list=28%, signal=54%	PLA2G2A/LAMA1/NRG1/TGFB2/TGFB3/FGF2/SLIT2/TGFB1/GPC1/FGFR1/FYN/TDGF1/FLT1/TGFBR2/APP/SRC/HCK/BLK/FGR/VEGFA
Glis2 targets up	Glis2 targets up	85	0.5367087618287443	1.936502697056681	1.6611002666362378e-5	2.6251498692361644e-4	1.906752162703205e-4	4154	tags=49%, list=22%, signal=39%	SERPINE1/MFAP4/CIDEC/DPT/CXCL12/COL14A1/FBN1/OGN/PDGFRA/CXCL14/MMP14/CCN2/COL3A1/COL1A1/ADAMTS2/IGSF10/DCN/NID1/VIM/LILRB5/TGFBI/COL1A2/SPARC/POSTN/MGP/SPARCL1/LUM/MFAP2/CFH/HLA-DQB2/LTBP2/ANGPTL4/CMTM3/VCAM1/CX3CL1/PDGFRL/COL18A1/TGFBR2/COL4A1/TLR2/COL15A1/CCL23
Shh targets up	Shh targets up	126	0.5068806136885826	1.9358931636084475	2.4422822410050553e-6	5.0532683155253196e-5	3.6703924611173e-5	3579	tags=37%, list=19%, signal=30%	PI16/FBN2/OMD/FOXD1/DSPP/INMT/FBN1/ALX4/NR4A1/KLB/CCN2/PENK/RASSF8/ENPP1/CLVS1/SMOC2/FILIP1L/PLPP3/TBX5/DCN/OLFML2B/NID1/IGFBP4/CYP1B1/IGFBP3/THBD/DUSP1/PTK7/BMP5/MGP/KLF4/APOD/TEK/TSC22D3/TSPAN5/AKAP12/ABCA3/ARHGEF10/TWIST2/IGF1R/LY6H/NCOA6/GLI1/KLF9/SLC35E3/RAMP2/BGLAP
Dilated cardiomyopathy	Dilated cardiomyopathy	90	0.5315319473689109	1.9357817322645956	1.7002995460669127e-5	2.6707144089441263e-4	1.9398475244762116e-4	3677	tags=47%, list=20%, signal=38%	SGCA/CACNA1C/ACTC1/CACNB4/ADCY1/CACNA2D2/ADCY5/PLN/TGFB2/DES/ITGA11/TGFB3/ADCY2/CACNG5/MYH7/DMD/ITGA10/LAMA2/MYL2/ITGA5/CACNA2D1/ITGA7/TGFB1/ADCY7/CACNB2/ITGA8/ADCY6/CACNG4/IGF1/ADCY9/ADRB1/CACNB3/SLC8A1/SGCD/ITGA4/ITGB1/ADCY4/CACNA1S/TTN/MYH6/CACNA1D/MYBPC3
Axon guidance	Axon guidance	129	0.5059123803315446	1.9349247879578482	1.6893540223889081e-6	3.641653524413245e-5	2.6450797399658967e-5	4496	tags=45%, list=24%, signal=34%	DPYSL5/SLIT1/UNC5D/CXCL12/NTN3/SEMA6C/EFNA2/SEMA6A/SEMA3D/SLIT3/EPHA5/UNC5C/SEMA3G/PLXNB3/EPHA4/KRAS/EPHA7/SEMA6B/EPHA8/L1CAM/NFATC2/NTNG1/EPHB4/SLIT2/PLXNA1/ABLIM3/DPYSL2/EPHB1/EFNB3/EPHB2/PLXNC1/SRGAP2/PAK3/LRRC4C/SEMA7A/EPHA3/RASA1/FYN/ABLIM1/SEMA3E/ITGB1/NFAT5/ROCK2/NFATC3/ROBO2/ABL1/GSK3B/PLXNA3/NFATC1/NTN1/SRGAP1/UNC5B/SEMA5A/EPHA2/PLXNB2/SEMA4C/NFATC4/PAK4
Pluripotent stem cell differentiation pathway	Pluripotent stem cell differentiation pathway	46	0.5934926983376337	1.9323720475532995	5.310997131931775e-5	7.138202858174824e-4	5.184764457504802e-4	3372	tags=63%, list=18%, signal=52%	FGF10/DKK1/KIT/TF/ALK/NODAL/FGF1/TGFB3/INHBA/FGF2/WNT1/FGF4/GDF5/IL11/BMP4/IL6/CSF1R/NT5E/TGFB1/WNT3A/NOTCH1/WNT7B/CXCR1/FST/IGF1/HGF/TNFSF11/WNT2B/KITLG
Pancreatic endocrine progenitor	Pancreatic endocrine progenitor	14	0.7833980608809725	1.9289934936175621	1.3492915298185214e-4	0.001531178405644278	0.0011121565936714221	2888	tags=71%, list=15%, signal=60%	POU3F4/ISL1/MYT1/NKX6-1/PAX4/NEUROD1/MAFA/ARX/MAFB/NKX2-2
Amine ligand binding receptors	Amine ligand binding receptors	37	0.620631307546816	1.9273554382534508	6.638898464228783e-5	8.615517603956345e-4	6.257797703919747e-4	3574	tags=54%, list=19%, signal=44%	HTR1E/ADRA1A/HTR5A/ADRB3/HTR6/ADRA2B/HTR7/ADRA2A/DRD1/HTR2A/HRH2/HTR1D/ADRB2/HTR4/DRD4/HTR1A/ADRB1/ADRA1D/HTR2C/ADRA1B
Colon and rectal cancer dn	Colon and rectal cancer dn	101	0.5206454830032178	1.9242215204468702	6.949337304755215e-6	1.243159228961766e-4	9.02956656374444e-5	4480	tags=49%, list=24%, signal=37%	PTPRZ1/PDK4/NAV1/CFD/CACNA2D2/ADAMTSL4/KRT84/TOX2/SASH1/LYPD3/FABP7/TLE4/CHST15/PRRT2/SYNC/COL4A5/JAM3/NUDT11/LRFN1/LDB2/GPC1/NR1H4/PARM1/SNCA/FHL1/GPR87/HIC2/RERE/STAR/HAUS5/PLD1/STAT5A/SIX1/SOCS2/MEF2D/CX3CR1/ZBTB4/PLPP1/MITF/CD28/SLC30A3/NAT8L/MYCN/TYRP1/UNC5B/TGFBR3/NR3C1/SCAMP5/PRKACB
Phospholipase c mediated cascade fgfr2	Phospholipase c mediated cascade fgfr2	17	0.7383453147313919	1.9231874649212541	5.594286775937792e-4	0.004835866689535488	0.003512484897290508	1930	tags=53%, list=10%, signal=48%	FGF10/FGF17/FGF7/FGF23/FGF1/FGF2/FGF4/FGF22/PLCG1
Hypothesized pathways in pathogenesis of cardiovascular disease	Hypothesized pathways in pathogenesis of cardiovascular disease	25	0.6686890279558501	1.9228817571751187	2.6403074856448395e-4	0.002698980985325836	0.001960378678251338	4266	tags=56%, list=23%, signal=43%	FBN2/SERPINE1/FBN1/FBN3/CCN2/RUNX2/AGTR1/POSTN/ENG/LTBP2/LTBP1/TGFBR2/FLNA/TGFBR3
Muscle contraction	Muscle contraction	194	0.4784335936273445	1.9220362613234336	5.202156205880151e-8	1.6646899858816483e-6	1.2091314358878025e-6	3822	tags=42%, list=20%, signal=34%	ATP1A2/SCN4A/FXYD7/MYH11/TRDN/CACNA1C/SLC8A3/KCND1/ACTC1/ATP1B2/CAMK2A/KCNIP1/LMOD1/KCNE4/SCN7A/SCN10A/CACNA2D2/PLN/SCN11A/SCN3A/SCN5A/NOS1/ACTA2/FXYD1/ACTN3/TBX5/DES/ITPR1/ACTG2/MYL10/KCNK12/GATA4/KCNK13/VIM/DMD/SCN2A/MYL2/FGF11/ITPR3/NPR2/KCNE5/KCNK2/SCN8A/KCNIP3/CACNB2/ATP1A4/MYH8/RYR1/TRPC1/TMOD2/CAMK2B/FXYD6/CACNG4/SLC8A2/KCNK3/KCNJ4/DYSF/FGF12/SCN4B/MYLK/ITPR2/KCNIP2/ANXA6/SLC8A1/KCNE2/ABCC…
Syndecan 4 pathway	Syndecan 4 pathway	31	0.6320108276343012	1.9164508331798995	3.249972233099053e-4	0.003159218291495532	0.0022946675846409405	1573	tags=35%, list=8%, signal=33%	CXCL12/FN1/LAMA1/TNC/ADAM12/MMP9/FGF2/FZD7/THBS1/TFPI/ITGA5
Il6 signaling scar dn	Il6 signaling scar dn	16	0.7446017040458494	1.9147866864255765	2.5281484119852975e-4	0.002615465987660292	0.0018997183691836258	3348	tags=62%, list=18%, signal=51%	SERPINE1/PDGFRA/CCN2/PSG6/ID3/THBS1/CCN1/SULF1/LOXL2/SGK1
Neoplastic transformation kras cdc25 dn	Neoplastic transformation kras cdc25 dn	53	0.5730021468585927	1.9124919650388548	2.2417400785333032e-4	0.0023715492576188045	0.0017225518165321287	3097	tags=42%, list=17%, signal=35%	CCN5/CCDC80/CXCL12/PDK4/TNC/IGSF10/LOX/NID1/CYP1B1/IL11RA/LAMA4/RNASE4/MGP/IL1RL1/PTGS2/LTBP2/ZFP36/LOXL1/VEGFD/PTX3/LY6H/VCAM1
Frs mediated fgfr2 signaling	Frs mediated fgfr2 signaling	24	0.6711204238315718	1.910761239332598	3.530803775027908e-4	0.003356217905709184	0.002437756344964889	2039	tags=42%, list=11%, signal=37%	FGF10/FGF17/FGF7/FGF23/KRAS/FGF1/FGF2/FGF4/FGF22/FRS2
Kshv infection angiogenic markers up	Kshv infection angiogenic markers up	162	0.48368553917077617	1.9095724015753104	8.114269247132143e-7	1.8830952775326487e-5	1.3677680025393441e-5	4263	tags=48%, list=23%, signal=38%	ANGPTL1/IFNA1/COL4A3/SFRP4/CXCL12/SFRP2/EFNA2/THBS2/STAB2/PDGFRA/TIMP3/WNT10B/EPHA4/DLL1/FGF1/HEG1/ANGPT1/PDGFD/ANGPT4/TGFB3/MMP2/EPHA7/MMP9/EPHA8/SERPINF1/WNT1/ANGPTL2/FZD7/STAB1/IL6/KDR/TIMP2/SPARC/PROM1/CALCRL/MMP19/PRL/CCN1/TGFB1/EPHB1/NOTCH2/TEK/FRS2/FGFR3/PGF/TIE1/PTGS2/CXCR1/ENG/DLL4/IGF1/FRZB/S1PR1/ROBO4/FGFR1/F2R/EPHA3/VEGFD/IL12A/PLXDC1/SPHK1/LPA/NOTCH4/HGF/F3/WNT2B/PLAU/COL18A1/PECAM1/…
Early response to tgfb1	Early response to tgfb1	54	0.570515035472235	1.9064213409827369	1.1153622228104051e-4	0.0013179693054860566	9.57294230345483e-4	1929	tags=37%, list=10%, signal=33%	SERPINE1/LRP1/FN1/HSPG2/MMP14/MMP3/TIMP3/PCDHGC3/VCAN/COL3A1/COL6A3/NID1/IGFBP3/LAMA4/IGF2R/COL1A2/IGFBP5/SPARC/MMP19/NOTCH2
Tgf beta signaling pathway	Tgf beta signaling pathway	85	0.5274893116507862	1.903237933362191	3.297133199355305e-5	4.7185639564107035e-4	3.4272831940666994e-4	2422	tags=33%, list=13%, signal=29%	COMP/GDF7/THBS2/THBS4/NODAL/LEFTY2/GDF6/AMHR2/TGFB2/BMP6/SMAD9/TGFB3/DCN/INHBA/BMP2/ID3/GDF5/THBS1/ID1/BMP4/CHRD/BMP5/ACVR1C/TGFB1/ACVRL1/ACVR2B/CREBBP/FST
Mammary luminal mature dn	Mammary luminal mature dn	95	0.5190585150072002	1.9007165864691355	1.4008657968005616e-5	2.2911938365449184e-4	1.664186435296908e-4	4092	tags=52%, list=22%, signal=41%	LTBP4/SFRP1/NTRK2/COL16A1/LAMA1/SLC6A15/ZNF521/AEBP1/FSTL1/IGFBP3/VIM/TLE4/RASL12/LPL/FRMD4A/FZD1/SNAI2/FOXO1/PDZRN3/HTRA1/COL6A2/IRS2/MOXD1/TIAM2/DPYSL2/SPARCL1/CYGB/EGFR/P3H2/TSHZ2/BTBD11/RECK/PRICKLE1/DAB2/CYRIA/MAP4K4/EPB41L2/SOX10/COL6A1/RASA3/B4GALT6/LRIG3/CALD1/WTIP/COL4A2/PALM2AKAP2/NREP/COL4A1/FOXN3
Adipogenesis peak at 2hr	Adipogenesis peak at 2hr	46	0.58310120151600775	1.8985380373850302	8.910119882362975e-5	0.0011008378329480585	7.995828898599112e-4	2979	tags=43%, list=16%, signal=37%	SERPINE1/FOXC2/NR4A1/CCN2/ACKR3/RGS2/FOSB/ID3/THBS1/DUSP1/IL6/KLF4/CCN1/TNFRSF1B/RHOJ/ERRFI1/PTGS2/RHOB/ZFP36/DNAJB4
Hypertrophic cardiomyopathy hcm	Hypertrophic cardiomyopathy hcm	83	0.5259483997383024	1.898481391838159	3.5927736663694573e-5	5.099165269734282e-4	3.7037292689411116e-4	3677	tags=42%, list=20%, signal=34%	SGCA/CACNA1C/PRKAG3/ACTC1/CACNB4/CACNA2D2/TGFB2/DES/ITGA11/TGFB3/CACNG5/MYH7/DMD/ITGA10/IL6/LAMA2/MYL2/ITGA5/CACNA2D1/ITGA7/TGFB1/CACNB2/ITGA8/CACNG4/IGF1/CACNB3/SLC8A1/SGCD/ITGA4/ITGB1/CACNA1S/TTN/MYH6/CACNA1D/MYBPC3
Tcf21 targets up	Tcf21 targets up	35	0.6095954746080691	1.8950074458630743	2.3125691489450978e-4	0.0024315012766051316	0.0017660973844253114	2895	tags=51%, list=15%, signal=44%	SOX11/PENK/COL8A2/VCAN/EPHA4/COL3A1/CCND2/IGDCC4/FAP/DCN/SERPINF1/COL6A2/LUM/CFH/CYP7B1/ISLR/COL6A1/CLDN9
Breast ductal carcinoma vs ductal normal up	Breast ductal carcinoma vs ductal normal up	46	0.5819799167131049	1.8948872099754517	9.439417125765962e-5	0.0011502389293806421	8.35464897423215e-4	2485	tags=39%, list=13%, signal=34%	ASPN/FN1/FBN1/SFRP2/LRRC15/DCLK1/COL11A1/COL5A2/VCAN/COL3A1/COL1A1/COL10A1/EPB41L3/COL1A2/POSTN/LUM/FAR2/SULF1
Brain hcp with h3k4me2 and h3k27me3	Brain hcp with h3k4me2 and h3k27me3	60	0.5559387356971063	1.8929203165080644	9.36703779835502e-5	0.0011490233032648825	8.345819391767444e-4	3291	tags=47%, list=18%, signal=39%	COL2A1/FOXI2/FLNC/PRPH/COMP/NR4A3/HOXA1/USH1G/LRRC15/GDF6/HTRA3/WNT9B/ACAN/VWA2/ATOH1/VGLL2/TWIST1/EOMES/TSC22D3/SLC6A4/LOXL2/FAM83G/SPHK1/ARID3C/SHISA3/RAB37/TMPRSS2/TNFSF11
Syndecan interactions	Syndecan interactions	27	0.6461559589928089	1.8926659992840589	2.920633966624049e-4	0.0029217681934072042	0.002122198007429432	1838	tags=41%, list=10%, signal=37%	FN1/COL5A1/VTN/COL5A2/COL3A1/TNC/COL1A1/FGF2/THBS1/COL1A2/TGFB1
Immortalized by tert dn	Immortalized by tert dn	173	0.47366871665329746	1.8907762287024514	4.875691338385784e-7	1.1905005580741024e-5	8.647085411804173e-6	4718	tags=53%, list=25%, signal=40%	GCGR/NTRK2/NR4A3/DPT/GHR/CCN5/CCDC80/FN1/PDE10A/ELN/THBS2/OGN/HSPG2/NR4A1/MYH2/LRRC15/EGR3/SLIT3/THBS4/MMP3/LRATD1/CELF2/FNDC1/VCAN/SNTG2/MYH1/NPY1R/ALDH1A3/MDFI/PLPP3/ADAM12/FAP/ANTXR1/MMP9/LAMA4/PAPPA/OPRL1/PDPN/CTSK/SH3PXD2B/PTK7/CCN1/ACHE/EGR1/SVIL/SERPINI1/CDON/ARHGEF6/DCT/FMOD/AKR1C1/ISLR/IMPG2/TSPAN5/MAP1B/MSX2/LTBP2/DNM1/SPN/MAFB/AKAP12/CPXM2/FGFR1/ABCC9/MYH4/KRT34/ZFPM2/KLF9/ADAM19/CNR1/…
Hdac1 targets dn	Hdac1 targets dn	247	0.46147979260079053	1.890608566278182	2.1962256426611215e-8	7.444049020388222e-7	5.406912852950339e-7	4344	tags=43%, list=23%, signal=33%	KCNA1/TUBB2B/PDE1C/C11orf96/COL16A1/COL5A1/CSDC2/PHLDB2/PNMA2/NXPH2/DKK3/ELFN2/COL11A1/RHOBTB3/TGFB2/MRC2/COL3A1/ADGRB2/C9/FSTL1/CAVIN1/NLRP1/CRISPLD1/COL1A1/LRRN1/NAP1L3/L1CAM/RUNX2/MATN3/IRS1/TGFBI/EBF1/BMP4/NOTCH3/TRO/MAGED4B/IGFBP5/HR/SYNC/CYTL1/CYS1/ITGA7/TIAM2/GLI2/FOXO6/ARHGEF40/FBLN1/CNN1/EFNB3/JAKMIP2/GLIS2/P3H2/TCF4/APLP1/EPHB2/ZNF608/FXYD6/MAF/COL12A1/IQCA1/EDIL3/TUBA1A/FKBP7/MYLK/PCDH…
Cdh1 signaling via ctnnb1	Cdh1 signaling via ctnnb1	83	0.5235615508052219	1.8898657400235765	4.2992698959334615e-5	5.92018693756485e-4	4.300070399444884e-4	2877	tags=36%, list=15%, signal=31%	SERPINE1/SPOCK1/FBN1/PRRX1/BGN/VCAN/ACTA2/ACKR1/ANOS1/KCNJ6/COL6A3/GREM1/CDH11/IGFBP3/GALNT10/ADRB2/AGTR1/SAA1/COL1A2/POSTN/MMP19/MFAP2/DOCK10/CREB3L1/PPL/EPHB2/MAP1B/LTBP2/EPAS1/LTBP1
Transcription factor regulation in adipogenesis	Transcription factor regulation in adipogenesis	22	0.672774544546042	1.8876517090719396	7.677360960106748e-4	0.006268425303719487	0.004553009961327799	1698	tags=41%, list=9%, signal=37%	ADIPOQ/LEP/SLC2A4/IRS1/IL6/FOXO1/TWIST1/PPARG/IRS2
Anchoring fibril formation	Anchoring fibril formation	15	0.7441959290693388	1.8850819588243728	0.0010331275581594228	0.007885441747610883	0.0057275141820768	4017	tags=73%, list=21%, signal=58%	COL4A3/COL4A4/TLL1/COL1A1/COL1A2/COL4A6/COL4A5/BMP1/COL4A2/LAMB3/COL4A1
Ips with hcp h3k27me3	Ips with hcp h3k27me3	99	0.5117012220727012	1.8844011828994494	1.1506562075155484e-5	1.92473401984419e-4	1.3980118994250768e-4	1774	tags=33%, list=9%, signal=30%	NPY5R/PCDH11X/CA10/ADGRL3/TMEM59L/MPPED1/CACNA1G/HOXA2/KCNS1/KCNIP1/SLITRK3/ASIC2/SORCS3/CRLF1/USH1G/IGF2/HOXA3/LHX9/RPH3A/TBX5/DUOX2/OSR1/CDH11/WNT1/PRDM8/PAPPA/PCDHA13/NTM/NPAS4/ZNF536/LRRK2/ARX/ACHE
Shc mediated cascade fgfr4	Shc mediated cascade fgfr4	19	0.70231545840514	1.8838949810103292	6.510903152835919e-4	0.0055080743913646394	0.004000736445999774	1295	tags=42%, list=7%, signal=39%	FGF17/FGF23/FGF19/KLB/KRAS/FGF1/FGF2/FGF4
Downstream signaling of activated fgfr2	Downstream signaling of activated fgfr2	29	0.6316598742940057	1.8818639798437793	4.442061485224768e-4	0.004036243522377073	0.0029316863603404907	2039	tags=38%, list=11%, signal=34%	FGF10/FGF17/FGF7/FGF23/KRAS/FGF1/FGF2/FGF4/FGF22/PLCG1/FRS2
Pretumor drug resistance dn	Pretumor drug resistance dn	13	0.7856114340568503	1.8814368695334507	2.5943303075870065e-4	0.0026575941734399704	0.0019303177685884062	4033	tags=100%, list=21%, signal=79%	DCHS1/COL8A1/VCAN/MMP2/ACAN/FRMD4A/DSE/LTBP2/TRAM2/CALD1/SEPTIN11/RREB1/TNS1
Immortalization dn	Immortalization dn	33	0.6156375040102147	1.8801590951588887	4.830252036751976e-4	0.004312904418257569	0.0031326363204694477	3181	tags=45%, list=17%, signal=38%	SERPINE1/CXCL14/CCN2/ALDH1A3/FILIP1L/IGFBP4/CYP1B1/IGFBP3/HTRA1/IGFBP5/SPARC/NDN/TGFB1I1/HSPA2/RB1
Kshv infection angiogenic markers dn	Kshv infection angiogenic markers dn	128	0.49029115564375314	1.8755680893401836	4.990249218408592e-6	9.486997776103714e-5	6.890788879954379e-5	2834	tags=40%, list=15%, signal=34%	ANGPTL1/SFRP1/CNMD/CD36/HAND2/LEP/PDGFRA/EPHA5/CCN2/TIMP3/TGFB2/EPHA4/SFRP5/DLL1/PDGFRB/ANGPT1/CFHR3/MMP2/EPHA7/FGF2/EPHA8/ID3/FZD7/THBS1/ID1/STAB1/FZD1/FZD2/EPHB4/NOTCH3/IL17F/MMP19/TGFB1/NOTCH2/NOTCH1/FRS2/FGFR3/CFH/TIE1/CDH5/EPHB2/WNT7B/RHOB/IGF1/ANGPTL4/FRZB/EPAS1/ADGRB1/FGFR1/EPHA3/FZD10
Uv low dose dn	Uv low dose dn	63	0.54795764448816	1.8751247799493889	2.0146987286094223e-4	0.00216244330204078	0.0015706697325014248	5761	tags=60%, list=31%, signal=42%	CXCL12/HMGA2/XYLT1/NAV3/CDH18/ANGPT1/COL13A1/SLIT2/IGFBP5/CDK14/ZNF804A/DOCK1/EIF4G3/COL6A1/RASA1/IGF1R/CEMIP/UTRN/SAMD4A/ERC1/DYNC1LI2/SLC20A2/FTO/MICAL2/SEMA5A/UBL3/PPP2R3A/CDH2/AP3B1/PTPRK/SEMA3C/DDIT4/VEGFC/MARF1/SATB2/STX12/EHBP1/TPST1
Embryonic stem cell pluripotency pathways	Embryonic stem cell pluripotency pathways	115	0.4968592281938189	1.8733397371386686	1.254628342149147e-5	2.0784068227499696e-4	1.509630650309771e-4	4262	tags=43%, list=23%, signal=34%	FGF10/FGF17/MAPK4/FGF7/FGF23/PDGFRA/FGF19/WNT6/WNT10B/SMAD9/PDGFRB/FGF1/FGF2/AKT3/WNT1/FGF4/WNT9B/FZD7/BMP4/FZD1/FZD2/WNT4/FGF11/FGF22/WNT3A/EGFR/FGFR3/ERAS/LRP6/WNT7B/PIK3CD/FGF12/AKT2/FGFR1/MAPK7/GAB1/WNT2B/APC/FOS/FZD8/GSK3B/JUN/MTOR/FGF13/SELENOP/WNT5A/MDM2/PDGFA/PTPN11/WNT5B
Signaling by met	Signaling by met	79	0.5234285715219192	1.8724300136916454	7.828650107476323e-5	9.861419401887045e-4	7.162746398681851e-4	3573	tags=33%, list=19%, signal=27%	COL2A1/COL11A2/FN1/LAMA1/COL24A1/COL5A1/LAMB1/COL11A1/COL5A2/COL3A1/KRAS/COL1A1/LAMA4/LAMA2/COL1A2/TNS4/HGFAC/RAB4B/PTPRJ/COL27A1/HGF/LAMB2/GAB1/LAMC1/ITGB1/LAMA5
Lymphoid stem cell up	Lymphoid stem cell up	92	0.5115076836057323	1.8650985415448318	4.4896650538448555e-5	6.119247184499654e-4	4.444655880372727e-4	6585	tags=62%, list=35%, signal=40%	C11orf21/MN1/SCN3A/NLRP1/PLXND1/RUNX3/BASP1/SLC35E2B/NCOR2/ADGRE2/RPS6KA2/MED13L/TCF4/USP34/RAB31/SATB1/P2RY14/RERE/PALLD/DOCK1/IQSEC1/LPIN1/TPR/SETBP1/NF1/ITGA4/ITSN2/MCM3AP/TNFAIP3/MACF1/ARHGAP45/TARBP1/ARHGAP25/TRAF5/TRIB2/CYTH4/SLC38A1/HLX/ABCA1/CHD3/UBR2/MSL1/TRIM33/BTK/RBM39/TNS3/DPEP2/ITIH4/MEF2A/IRF8/SF3B1/SETD5/ATR/CCNL1/TRAF3IP3/KDM3A/OSBPL3
Erythroid differentiation 12hr	Erythroid differentiation 12hr	36	0.5990251948995113	1.86450580468935	3.244780584164389e-4	0.003159218291495532	0.0022946675846409405	5161	tags=75%, list=28%, signal=54%	HOXA4/HAND2/HIC1/CAVIN1/TFCP2L1/HR/ARX/EGR1/NOTCH1/TEAD1/NDN/ARNT2/SATB1/HDAC5/KLF6/ESR1/ZFP14/ZFP37/KLF9/FOS/JUN/PBX3/NAB2/SPIB/FOXB1/BACH1/DLX5
Npc hcp with h3k27me3	Npc hcp with h3k27me3	354	0.438574037360978	1.863142668442901	1.1196793487723172e-9	4.807156670729148e-8	3.49163165340841e-8	3276	tags=38%, list=17%, signal=32%	IGF2BP1/CA10/SIX6/PAX3/NKX2-1/CBLN2/SFRP1/PRPH/ISL1/MPPED1/ST8SIA3/GRIN2B/CBLN4/NELL1/LRFN5/TMEM130/SIM2/VSTM2L/HOXA10/TCERG1L/COL14A1/SCUBE1/PTH1R/TMEM132E/SLC17A6/ALK/FEZF2/SORCS3/SRCIN1/HOXA9/CXCL14/IGF2/SLC38A4/HOXC13/DPP10/NKX6-1/NXPH2/VAT1L/CACNA2D2/CYP26A1/PENK/SLC22A3/HTR7/GALNT13/HCRTR1/HPCAL4/FAM163B/HOXD12/FEV/HCN1/BMP6/SFRP5/SCN5A/C1QL1/FOXG1/STMN2/KCNH1/CDH8/SHISA6/BHLHE23/SCNN1G/CPZ…
Burn wound healing	Burn wound healing	98	0.5048219558191269	1.8616410689219332	3.459136877634685e-5	4.923058893252458e-4	3.575816109331581e-4	2056	tags=38%, list=11%, signal=34%	FOXE1/CXCL12/FN1/FBN1/SFRP2/ELN/CXCL14/TLR9/MMP3/SLURP1/TGFB2/F13A1/TNC/KRT222/PDGFRB/COL1A1/ADAM12/TGFB3/DCN/INHBA/MMP2/MMP9/VIM/IL6/KDR/CD248/SNAI2/TIMP2/BCL2/COL1A2/SPARC/KLF4/ACHE/TLR8/TGFB1/SCEL/FGFR3
Negative regulation of tcf dependent signaling by wnt ligand antagonists	Negative regulation of tcf dependent signaling by wnt ligand antagonists	15	0.7338029838818235	1.8587561584447119	0.0013851505875471233	0.009966893613188239	0.007239356569729526	2363	tags=60%, list=13%, signal=52%	SFRP1/DKK1/SFRP2/WIF1/WNT4/DKK2/WNT3A/LRP6/WNT9A
Integrin3 pathway	Integrin3 pathway	43	0.5795322205334574	1.858141642830361	2.8503661720359597e-4	0.002857020723410363	0.0020751693101756785	4344	tags=63%, list=23%, signal=48%	COL4A3/COL4A4/FN1/FBN1/LAMB1/VTN/TNC/PDGFRB/COL1A1/L1CAM/LAMA4/THBS1/TGFBI/KDR/COL1A2/COL4A6/CCN1/COL4A5/EDIL3/SPHK1/LAMC1/PLAU/PECAM1/TGFBR2/COL4A1/PLAUR/SDC1
Constitutive signaling by aberrant pi3k in cancer	Constitutive signaling by aberrant pi3k in cancer	77	0.520615367322591	1.857676140235008	7.116403094454898e-5	9.075175431344464e-4	6.591665711513071e-4	3563	tags=39%, list=19%, signal=32%	FGF10/FGF17/FGF7/KIT/FGF23/PDGFRA/FGF19/NRG1/KLB/PDGFRB/FGF1/FGF2/KL/IRS1/FGF4/IRS2/FGF22/EGFR/FRS2/FGFR3/PIK3CD/NRG2/FGFR1/ESR1/FYN/HGF/GAB1/KITLG/CD28/PIK3CB
Targets of runx1 runx1t1 fusion monocyte dn	Targets of runx1 runx1t1 fusion monocyte dn	55	0.5529023903157579	1.8570521145715984	1.0382441020619594e-4	0.0012439613055402826	9.035392369229538e-4	6269	tags=64%, list=33%, signal=43%	CD1E/CPA3/CD1A/HDC/CD1C/RGS2/CYP1B1/CLC/HBB/HBA1/PLXNC1/CCR6/P2RY14/PTGER3/UTRN/S100B/RNF24/ROCK2/ENTPD1/FGL2/BTG2/SDC2/LDLRAD4/IRF4/CD1B/SLC38A1/GPR171/HIP1/PTPN22/ARL4C/MDM4/ADAM8/HLA-DQB1/MAP3K2/IVNS1ABP
Targets of pax3 foxo1 fusion dn	Targets of pax3 foxo1 fusion dn	95	0.5070745045488231	1.8568328878261393	4.111924246979779e-5	5.710143859956826e-4	4.147507645910942e-4	4227	tags=45%, list=23%, signal=35%	SERPINE1/NELL1/KIT/THBS2/COL5A1/CPEB1/AJAP1/CFD/DKK3/TIMP3/MTUS2/ADRA2A/BMERB1/PKP1/TNC/DISC1/IL11/ID1/FOXF1/BMP4/PDZRN3/CELA2B/BMP5/JAKMIP2/EPHB2/KCNG1/MAFB/CDH3/DGKD/BMP1/ZFYVE16/SH3BP4/ADAM19/CNR1/FLNB/MYCN/RASSF4/RREB1/GTF3C1/GADD45B/EPHA2/ARHGAP25/NKAIN1
Malignant pleural mesothelioma	Malignant pleural mesothelioma	434	0.42890764016867533	1.8561614804107036	1.7186923668788618e-10	8.353493466188581e-9	6.067479011176122e-9	4114	tags=35%, list=22%, signal=28%	FGF10/FGF17/FABP4/CTNNA3/SFRP1/NGFR/CDH10/DKK1/NTRK2/LIN28B/FGF7/COL4A3/CDH7/KIT/COL4A4/PRKAG3/SFRP4/CXCL12/ACTC1/FN1/LAMA1/SFRP2/CDH22/EFNA2/TCF7L1/FGF23/PDGFRA/FGF19/CDH20/IGF2/WIF1/MMP14/SELE/LAMB1/MMP3/CCN2/WNT6/WNT10B/CDH18/SFRP5/CXXC4/CCND2/ACTA2/PDGFRB/CDH8/NGF/FGF1/ANGPT1/PDGFD/ROR2/ANGPT4/MAP3K10/MMP2/MMP9/ACTG2/FGF2/AKT3/MAPK10/CDH11/SERPINF1/WNT1/LAMA4/FGF4/LATS2/FZD7/IL6/NLRP3/FZD1/KD…
Fgfr1 ligand binding and activation	Fgfr1 ligand binding and activation	15	0.7325699128501479	1.855632733732261	0.0014310667219359918	0.010225874828591166	0.007427465065307616	1811	tags=60%, list=10%, signal=54%	FGF10/FGF17/FGF23/ANOS1/FGF1/FGF2/KL/FGF4/FGF22
Uterine fibroid up	Uterine fibroid up	44	0.573782012581877	1.8547181434354372	2.9918208689199777e-4	0.002981404471310585	0.0021655142398474036	4316	tags=59%, list=23%, signal=46%	PLP1/FN1/IGF2/ART4/COL5A2/COL3A1/COL1A1/COL9A2/EDNRA/ITM2C/IGSF3/MFAP2/HEPH/SULF1/LTBP2/LOXL2/HSD17B6/PDE8B/CRMP1/STARD13/ZMAT3/COL4A2/COL4A1/TGOLN2/CCND1/MMP11
Neuroblastoma copy number gains	Neuroblastoma copy number gains	49	0.5659898791141731	1.8545787447126574	5.960626531899371e-4	0.005126735875182898	0.00372375491097483	2645	tags=27%, list=14%, signal=23%	LYVE1/FGF7/FBN1/ALK/IGF2/HDC/IRAG1/MYT1L/RNF144A/ARAP3/HSD17B2/NKD2/ZFHX3
Serotonin receptors	Serotonin receptors	12	0.7841548759535868	1.8504140286732722	2.5195127331562847e-4	0.0026117765797225713	0.0018970386034884235	2468	tags=67%, list=13%, signal=58%	HTR1E/HTR5A/HTR6/HTR7/HTR2A/HTR1D/HTR4/HTR1A
Signaling by fgfr1	Signaling by fgfr1	49	0.5646984231753014	1.8503470317044441	6.388930077832497e-4	0.005426184217004719	0.003941256311591161	3278	tags=39%, list=17%, signal=32%	FGF10/FGF17/FLRT1/FLRT2/FGF23/KRAS/ANOS1/FGF1/FGF2/KL/FGF4/FGF22/PLCG1/FRS2/FLRT3/SPRED2/FGFR1/SPRY2/GAB1
Pi 3k cascade fgfr2	Pi 3k cascade fgfr2	22	0.6592669607974397	1.8497525142299498	0.0014981860949229498	0.010609554942752258	0.007706147397328433	2039	tags=41%, list=11%, signal=37%	FGF10/FGF17/FGF7/FGF23/FGF1/FGF2/FGF4/FGF22/FRS2
Shc mediated cascade fgfr1	Shc mediated cascade fgfr1	20	0.6761380284141528	1.846557842514659	0.001275882982140331	0.009284391418060712	0.006743627715594525	1811	tags=45%, list=10%, signal=41%	FGF10/FGF17/FGF23/KRAS/FGF1/FGF2/KL/FGF4/FGF22
Neuronal differentiation up	Neuronal differentiation up	18	0.7000617977280079	1.845302021480849	8.854647452076275e-4	0.006969801699799401	0.005062447908382411	3920	tags=67%, list=21%, signal=53%	CA10/KCND1/SNCAIP/SCN2A/SYT11/KCNK2/GABBR1/KCNB1/KCNAB1/ANK2/CNR1/ASIC1
Thyroid cancer dn	Thyroid cancer dn	289	0.4415259790671004	1.8419357217032102	6.27896602672485e-8	1.984615519612664e-6	1.4415062463678942e-6	3900	tags=39%, list=21%, signal=32%	COL9A3/ADH1B/RERGL/TNXB/SFRP1/CCL14/FCGBP/AOC3/DPT/KIT/GHR/CXCL12/TAL1/PDE10A/SEMA3D/OGN/CD36/FLRT2/COL8A1/IGF2/BGN/PLN/CCL21/GFRA2/ENPP1/CCND2/FXYD1/HLF/ACKR3/GNA14/ROR2/DCN/DPP6/MMP2/ITPR1/CLDN5/EPB41L3/BMP2/FOSB/MAGED4/ID3/IRS1/LRP2/TLE4/GATA3/SYNE1/TFPI/LAMA2/RGS17/BCL2/SALL2/PROM1/CYBRD1/MGP/HBB/CCN1/APOD/EGR1/ALDH1A2/RECQL/TGFB1/SRPX/FBLN1/CLCNKA/KCNK2/EMCN/TEK/LDB2/LLGL1/TSC22D3/FAXDC2/FHL…
Wilms tumor vs fetal kidney 2 dn	Wilms tumor vs fetal kidney 2 dn	48	0.5645210437070753	1.8412884944336816	3.031956663860188e-4	0.003009757366514006	0.002186108090462016	4344	tags=60%, list=23%, signal=47%	COL5A1/DDR2/TIMP3/ANGPT1/AGT/INHBA/LHX1/CDH11/RUNX3/THBS1/GATA3/FZD1/IGFBP5/AGRN/DAB2/GNG11/FRZB/IGF1R/RET/CX3CL1/BMP7/COL4A2/PMP22/TGFBR2/SELENOP/COL4A1/IGFBP6/TGFBR3/SDC1
Dlbcl vs follicular lymphoma dn	Dlbcl vs follicular lymphoma dn	43	0.5739069766951365	1.8401055449971162	3.3523113251054856e-4	0.0032312182281045566	0.0023469640407223972	4439	tags=44%, list=24%, signal=34%	RAPSN/CCL14/CSN2/CCL21/ACKR1/ST8SIA1/TSC22D3/GLIPR1/POU6F1/TXNIP/PDCD1/CD69/ANK2/ITGA4/MEF2C/SELENOP/TRAF5/TRIB2/LY9
Peptide gpcrs	Peptide gpcrs	74	0.5229974313089671	1.8398923271243655	9.637428626711919e-5	0.001171038497283486	8.50572461965265e-4	2789	tags=35%, list=15%, signal=30%	NPY5R/SSTR1/MC5R/AVPR2/NMBR/NTSR1/HCRTR1/NPY1R/ACKR1/CCKAR/EDNRA/BDKRB1/MC3R/SSTR3/OPRL1/NTSR2/AGTR1/C5AR1/AVPR1B/CXCR1/FPR1/BDKRB2/SSTR2/CCR6/OPRK1/CCR4
Frs mediated fgfr1 signaling	Frs mediated fgfr1 signaling	22	0.6555531344658186	1.8393323657880802	0.0015430545709421764	0.010875262858405052	0.00789914176643306	2039	tags=45%, list=11%, signal=41%	FGF10/FGF17/FGF23/KRAS/FGF1/FGF2/KL/FGF4/FGF22/FRS2
Hcc progenitor wnt up ctnnb1 dependent blocked by fzd8crd	Hcc progenitor wnt up ctnnb1 dependent blocked by fzd8crd	45	0.5664669093618663	1.8388837327455767	4.8746124939017156e-4	0.004344983316363606	0.0031559365171773086	2384	tags=40%, list=13%, signal=35%	SERPINE1/DPT/CRISPLD2/PI15/COL5A2/COL3A1/ST6GAL2/PRICKLE2/KLHL4/MAGED4B/IGF2BP3/IGFBP5/EPYC/LUM/RDH10/SRPX2/EPHB2/NKD2
Cell migration and invasion through p75ntr	Cell migration and invasion through p75ntr	30	0.6119399110801855	1.8366633803494525	0.0012358854217184108	0.009044434222575642	0.00656933713248946	2687	tags=40%, list=14%, signal=34%	NGFR/NTRK2/EFNA2/MMP8/MMP2/MMP9/AKT3/CDH11/TWIST1/EFNB3/KIDINS220/AKT2
Uterine fibroid dn	Uterine fibroid dn	65	0.5340335031292889	1.834101531905518	2.819621848427742e-4	0.0028317137939765547	0.002056787867274161	4634	tags=48%, list=25%, signal=36%	ADH1B/GSTM5/KLF2/ABCA8/ACKR3/HOXA5/GATA2/TFPI/MOXD1/KLF4/EGR1/PHYHIP/GSDME/LEPR/EFHD1/HIVEP2/MAP3K5/PTGER3/LTBP1/CBX7/ABLIM1/CITED2/C1S/GIMAP6/MS4A4A/GADD45B/PLCE1/PTCH1/NR3C1/MDFIC/ATF3
Orexin receptor pathway	Orexin receptor pathway	148	0.46822941460911416	1.8323539012664032	6.715967620935686e-6	1.2098134679391837e-4	8.78736286066484e-5	3615	tags=37%, list=19%, signal=30%	ADIPOQ/GRIN2B/NR4A3/CRH/HMGA2/SP7/LEP/NR4A1/EGR3/SELE/MMP3/CCN2/DCLK1/HCRTR1/TNC/CGA/TRIM9/PRDM16/SLC2A4/GRIA1/FOSB/RUNX2/ID3/LIPE/LPL/PAPPA/ID1/NPAS4/IL6/LAMA2/PPARG/KLF4/EGR1/HSD3B2/CYP11B1/GLIS2/LRRC8C/COX7A1/KCNK3/LUZP1/STAR/OPRK1/AVP/JARID2/RUNX1/OPN3/PLD1/VCAM1/SGK1/ARC/EGR2/BMP7/FOS/BGLAP/GRIA2
Neuronal system	Neuronal system	409	0.42586234580422433	1.831099494569582	5.705694898270242e-10	2.556151314425068e-8	1.8566357311991497e-8	3860	tags=37%, list=21%, signal=30%	LRRC4B/KCNA1/SLC1A7/KCNH5/TUBB2B/KCNC2/GRIN2C/GRIN2B/KCNA4/GABRA1/CHRND/GABRQ/GABRA4/KCND1/KCNJ15/KCNA6/KCNS1/PRKAG3/KCNH7/CACNB4/LRFN2/CAMK2A/GNAT3/ADCY1/SLITRK3/SLC1A6/GABRG2/PTPRD/SLITRK1/NLGN4Y/NRG1/SYT1/CACNA2D2/ADCY5/SLC18A3/HCN1/KRAS/KCNJ10/KCNH1/KCNJ6/GABRA3/SLC6A1/LRRTM4/LIN7A/ADCY2/NEFL/GJD2/RASGRF2/GNG2/GRIA1/EPB41L3/KCNK13/SYN2/MAPT/GRM1/HTR3E/NLGN3/NRXN1/TUBB4A/GRIK2/KCNA5/GNB3/CHRNG…
Serotonin and anxiety	Serotonin and anxiety	17	0.7023007302212132	1.8293011874231853	0.0022914756371938253	0.014800774652393506	0.010750399209149011	3548	tags=65%, list=19%, signal=53%	ADRA1A/CRH/GABRA1/HTR2A/GRM1/CAMK2B/HTR1A/PLCD4/HTR2C/ARC/FOS
Prostate development 12hr dn	Prostate development 12hr dn	52	0.5542319851486408	1.8283073005442267	3.3668888234636034e-4	0.003236233436284419	0.002350606788572881	1670	tags=37%, list=9%, signal=33%	ELAVL3/PRPH/NTRK2/CXCL12/HMGA2/SYT4/GAP43/COL8A1/PRRX1/HIC1/NUAK1/AMHR2/RFLNA/GNA14/LIX1/INHBA/IGFBP4/TGFBI/BASP1
Methylated de novo in cancer	Methylated de novo in cancer	87	0.5054063913402796	1.8276093483988796	9.771911060853549e-5	0.001179037137834133	8.56382197000724e-4	2330	tags=32%, list=12%, signal=28%	PCDH11X/SLIT1/SFRP1/FOXE1/NTRK2/CACNA1G/CXCL12/MYOD1/FBN1/TBX1/ASIC2/POU3F1/EGR3/HIC1/RBP4/SFRP5/DLC1/GATA4/PRKG1/THBD/BCL2/GATA5/HRK/KLF4/GJB2/NPTX1/CDH4/HBA1
Chronic lymphocytic leukemia dn	Chronic lymphocytic leukemia dn	76	0.5163821068093642	1.8274929407244918	7.054449812851376e-5	9.040926725325943e-4	6.566789495859294e-4	4790	tags=50%, list=26%, signal=37%	COL9A3/PDE10A/ABCA6/NEURL1/OR3A2/FILIP1L/STATH/COL9A2/PDGFD/FRY/NEFL/ID3/VASH1/CCDC88A/IGSF3/IL33/CDK14/PTPRO/APBB2/ROR1/SPOCK2/FMOD/HIVEP2/MAP3K5/CCR4/GNRH2/TTN/RXRA/MICAL2/ABR/PBX3/NEK3/TBXA2R/SYT17/PROS1/INPP5F/CCR7/FCER2
Diseases of glycosylation	Diseases of glycosylation	142	0.47154875842581223	1.827304855971419	1.1370659911035406e-5	1.908196738164639e-4	1.386000205168211e-4	2301	tags=28%, list=12%, signal=25%	MUC7/NCAN/OMD/ADAMTS16/ADAMTSL1/THBS2/OGN/HSPG2/ADAMTS5/ADAMTSL2/ADAMTS7/CSPG4/GPC6/ADAMTSL4/BGN/MUC17/ADAMTS4/VCAN/ADAMTS19/ADAMTS10/ADAMTS2/GPC2/DCN/ADAMTS9/KERA/ACAN/PAPSS2/THBS1/THSD7A/NOTCH3/ADAMTS12/ADAMTSL3/LUM/NOTCH2/NOTCH1/ADAMTS18/GPC1/CHST3/AGRN/FMOD
Breast cancer pathway	Breast cancer pathway	153	0.46505533681988614	1.8272307520126896	2.94517522908891e-6	6.0195757486480776e-5	4.372260499028261e-5	4262	tags=39%, list=23%, signal=31%	FGF10/FGF17/FGF7/KIT/SFRP4/TCF7L1/FGF23/FGF19/WNT6/WNT10B/KRAS/DLL1/CDK6/FGF1/FGF2/AKT3/WNT1/FGF4/FZD7/FZD1/APC2/FZD2/NOTCH3/WNT4/FGF22/WNT3A/NOTCH2/EGFR/NOTCH1/LRP6/SHC2/WNT7B/DLL4/PIK3CD/IGF1/AKT2/FGFR1/FZD10/ESR1/IGF1R/BRCA1/NOTCH4/RB1/NCOA3/TNFSF11/WNT2B/APC/SHC4/FOS/FZD8/GSK3B/TCF7L2/JUN/MTOR/POLK/WNT5A/GADD45B/DLL3/CCND1/WNT5B
G alpha s signalling events	G alpha s signalling events	136	0.4739446844103319	1.8267361852387407	2.2783771370903772e-5	3.422215454894934e-4	2.4856930251208507e-4	3458	tags=44%, list=18%, signal=36%	MC5R/GLP2R/AVPR2/CRH/ADRB3/PTH1R/HTR6/PDE10A/GNAT3/ADCY1/GPR45/ADCY5/HTR7/DRD1/GPR15/CGA/CRHR2/HRH2/GRK5/ADCY2/MC3R/GNG2/GPR176/ADCYAP1/PDE7B/ADRB2/NPSR1/GNB3/PTGER4/CALCRL/ADORA2A/PDE1B/PDE3A/CALCR/GPR20/PDE3B/ADCY7/SCT/VIPR2/GNG4/GNAZ/ADCY6/HTR4/PTGIR/CALCB/GNG11/AVP/CRHR1/ADCY9/GPR150/ADRB1/PTGDR/PDE2A/VIP/PTGER2/PDE8B/GPR83/PTHLH/ADCY4/RAMP2
Diseases associated with o glycosylation of proteins	Diseases associated with o glycosylation of proteins	67	0.5250016064344991	1.826599243072259	5.532160340061959e-4	0.004802093644399669	0.00348795417330844	2070	tags=33%, list=11%, signal=29%	MUC7/ADAMTS16/ADAMTSL1/THBS2/ADAMTS5/ADAMTSL2/ADAMTS7/ADAMTSL4/MUC17/ADAMTS4/ADAMTS19/ADAMTS10/ADAMTS2/ADAMTS9/THBS1/THSD7A/NOTCH3/ADAMTS12/ADAMTSL3/NOTCH2/NOTCH1/ADAMTS18
H3k27me3 in normal and methylated in cancer	H3k27me3 in normal and methylated in cancer	28	0.6189586163972043	1.8249751822920743	0.0017758848904951628	0.01218823533535834	0.008852806598806577	1778	tags=39%, list=9%, signal=36%	KCNA1/MYT1/SFRP4/HOXA9/HOXD12/COL1A1/CRHR2/DES/GJD2/PCDHGB5/GRIA4
Targets of mir15a and mir16 1	Targets of mir15a and mir16 1	91	0.5017420773708272	1.8249341647050186	1.2407802933145736e-4	0.001430089501377334	0.0010387316478825644	5199	tags=43%, list=28%, signal=31%	EYA1/ZNF423/FGF7/GHR/HMGA2/HSPG2/HOXA3/CYP26B1/CCND2/DLL1/PLAGL1/FGF2/AKT3/PAPPA/BCL2/CCNE1/WNT3A/RECK/SPEG/LUZP1/PIM1/CDK5R1/KCNAB1/RSPO3/WNT2B/OTX1/WSB1/MACF1/PCDHAC1/BTG2/UBE4B/CCND1/PTCH1/HAS2/PRDM4/AGO4/BTRC/ADAMTS3/ACVR2A
Development of ureteric collection system	Development of ureteric collection system	60	0.5353719196751074	1.8228921975911334	3.6450559395288714e-4	0.0034268847081118147	0.0024890844919372144	3755	tags=55%, list=20%, signal=44%	GFRA1/SALL1/EYA1/BMPER/PAX2/TGFB2/GLI3/ANOS1/LHX1/BMP2/GATA3/BMP4/FAT4/SLIT2/HOXD11/BMP5/GLI2/VANGL2/ITGA8/FST/SIX2/GRIP1/FREM2/SIX1/GLI1/RET/RARB/FRAS1/ITGB1/GREB1L/BMP7/ROBO2/MYCN
Esr1 targets via akt1 dn	Esr1 targets via akt1 dn	82	0.5052541937937374	1.8227262897542222	1.4513378105412557e-4	0.0016279241653947365	0.0011824269385375713	5274	tags=48%, list=28%, signal=34%	PDK4/LAMB1/TGFB2/TNC/DLL1/CDK6/PLPP3/SASH1/ATP8B2/PSD3/CHST15/GALNT10/IGSF3/KIAA0513/PLEKHF1/AFAP1L2/PPL/FAXDC2/EPS8/CDH3/ESR1/CLDN9/SLC22A23/MKX/MEF2D/SEMA3E/KLF9/ARID5B/ABCC5/RBL2/S1PR3/ZMYND8/PTPN14/GTF2IRD1/CDYL2/HBP1/SNTB2/ZKSCAN1/IL1R1
Carcinogenesis by kras and stk11 dn	Carcinogenesis by kras and stk11 dn	17	0.6997327937898932	1.8226124158458563	0.002449506015258748	0.015560856955133253	0.011302477622486663	2771	tags=65%, list=15%, signal=55%	FN1/ITGBL1/THBS2/PDGFRB/DCN/MMP2/NEDD9/LOXL3/LUM/LOXL1/FGFR1
Fgfr2 ligand binding and activation	Fgfr2 ligand binding and activation	19	0.6793466711095023	1.8222833753019663	0.0018520074099649105	0.012587786512057017	0.00914301672326796	1811	tags=47%, list=10%, signal=43%	FGF10/FGF17/FGF7/FGF23/FGFBP2/FGF1/FGF2/FGF4/FGF22
Defective b4galt7 causes eds progeroid type	Defective b4galt7 causes eds progeroid type	20	0.6669581120529493	1.8214871530429142	0.0018273139778320448	0.01245280636744801	0.00904497520355461	2147	tags=50%, list=11%, signal=44%	NCAN/HSPG2/CSPG4/GPC6/BGN/VCAN/GPC2/DCN/GPC1/AGRN
Transformed by rhoa reversibly dn	Transformed by rhoa reversibly dn	29	0.6094993631227238	1.8158425821813555	0.0010728559039810924	0.008164480970916673	0.005930191617278681	2160	tags=48%, list=12%, signal=43%	SERPINE1/PHLDB2/IGF2/CCN2/TNC/INHBA/IRGM/ACTG2/LATS2/THBS1/PTGER4/CCN1/ERRFI1/FHL1
Wilms tumor	Wilms tumor	27	0.6196265438883224	1.8149582551236227	9.694094600096873e-4	0.007521683039111308	0.005463301569965819	1602	tags=44%, list=9%, signal=41%	COL2A1/BRINP1/EYA1/HMGA2/PAX2/HOXA9/MN1/GLI3/FOXG1/COL13A1/FZD7/SALL2
Facioscapulohumeral muscular distrophy up	Facioscapulohumeral muscular distrophy up	20	0.6645202072403	1.8148291452665133	0.0018887348742510004	0.012816130467516531	0.009308872142044228	2910	tags=70%, list=16%, signal=59%	BRINP1/EBF2/THBS2/PRG4/PDGFRA/COL6A3/NID1/CCN4/ID3/ID1/POSTN/PGF/ADGRL2/RARRES1
Frs mediated fgfr4 signaling	Frs mediated fgfr4 signaling	21	0.6531279710802411	1.8143528756387415	0.003015530178190732	0.0183423984392428	0.013322823318794572	2039	tags=43%, list=11%, signal=38%	FGF17/FGF23/FGF19/KLB/KRAS/FGF1/FGF2/FGF4/FRS2
Molecular arms vs erms dn	Molecular arms vs erms dn	176	0.45374714327559357	1.8136430716997733	5.214786420291505e-6	9.822758843636927e-5	7.13466567692246e-5	2046	tags=27%, list=11%, signal=24%	MAGEL2/ZIC1/LTBP4/FBN2/ZFHX4/CACNA1G/MFAP4/TRIL/EMILIN1/HOXA10/ADGRA2/PTH1R/HMGA2/HIF3A/NAV3/SNCAIP/NUAK1/RBMS3/DENND2A/COL5A2/CYP26B1/OLFML1/DLC1/GLT8D2/PLPP3/TP63/MMP2/PSD3/OLFML3/FZD7/PVALB/BMP4/COLEC12/FAT4/LAMA2/CD248/EPHB4/ITM2C/CSRNP3/GNB3/PTGER4/MFAP2/ARHGEF40/FBLN1/EGFR/ASAP3/CREB3L1
Breast cancer 19q13.1 amplicon	Breast cancer 19q13.1 amplicon	22	0.6460156385751724	1.812572330700259	0.00217224438452683	0.014238426296542274	0.010341942931556021	6112	tags=91%, list=33%, signal=61%	ZNF540/ZNF781/ZNF585A/ZNF585B/ZNF568/ZNF569/ZNF790/ZNF571/ZNF260/ZNF529/ZNF382/ZNF793/ZNF383/ZNF875/ZNF829/ZNF527/ZNF570/ZNF420/ZNF567/ZNF345
Nitric oxide stimulates guanylate cyclase	Nitric oxide stimulates guanylate cyclase	22	0.6456866535271292	1.8116492737962304	0.0022022059042783554	0.014402297994720143	0.010460969551166663	2949	tags=50%, list=16%, signal=42%	PDE10A/NOS1/IRAG1/ITPR1/PRKG1/KCNMB2/PDE1B/NOS2/PDE5A/KCNMB1/PDE2A
Tgfb1 targets 1hr up	Tgfb1 targets 1hr up	33	0.5931802387144796	1.8115745282292692	0.0012189964797519087	0.008984649304265856	0.006525912936553024	4077	tags=45%, list=22%, signal=36%	SERPINE1/FBLN2/NR4A1/EGR3/ID1/IL6/RASL11B/PTGS2/WNT9A/SNAI1/CDK5R1/CSRNP1/EGR2/ID2/GADD45B
Regulation of wnt bcatenin signaling by small molecule compounds	Regulation of wnt bcatenin signaling by small molecule compounds	17	0.6942630566974566	1.8083652477488856	0.003176447256054838	0.019118056382236598	0.013886214947460588	3813	tags=65%, list=20%, signal=52%	LRP1/SFRP4/DKK3/WNT1/FZD7/FZD1/TCF4/TNKS/APC/FZD8/GSK3B
Tumor vasculature dn	Tumor vasculature dn	13	0.7549194454844703	1.8079335619235002	0.0010320065804640649	0.007885441747610883	0.0057275141820768	2275	tags=54%, list=12%, signal=47%	ABI3BP/OGN/SELE/CELF2/PLN/ARX/PWWP3B
Methylated in lung cancer up	Methylated in lung cancer up	366	0.42369756988381757	1.8075929684455838	1.614515809944208e-8	5.582540572370845e-7	4.054824234794532e-7	3094	tags=29%, list=16%, signal=25%	COL2A1/ADRA1A/CNTNAP5/GALNT15/ISL1/HTR5A/HOXD13/CACNA1C/KCNA4/NELL1/LRFN5/GABRQ/NKAIN4/KIT/MEDAG/KCNH7/CXCL12/TF/PCDHGB2/SLC17A6/BCAT1/COL5A1/HOXA9/AJAP1/ZCCHC24/EPHA5/CLMP/CYYR1/CACNA2D2/ADAMTSL4/PENK/SLC22A3/ELAVL2/PCDHGC4/SULF2/HOXD12/APCDD1L/NEFM/HOXA7/PKP1/ST6GAL2/CAVIN1/COL1A1/GNA14/DLC1/RSPO2/NEFL/IGFBP4/LHX1/ENPP2/PAM/JPH2/KL/PRDM8/ADAM30/GFPT2/FGF4/ANGPTL2/NID2/NHLH2/GATA3/TGFBI/AGTR1/C1…
Neoplastic transformation kras dn	Neoplastic transformation kras dn	140	0.4666607831185515	1.8069118116978589	1.4585366569449462e-5	2.3630128479812463e-4	0.00017163514781328318	5380	tags=51%, list=29%, signal=37%	TNXB/HOXA2/CCDC80/KLF2/FBN1/ELN/TCF7L1/COL5A1/CRLF1/SLC38A4/CCN2/TIMP3/COL5A2/FSTL1/COL1A1/PCOLCE/PER1/GRK5/ID3/LPL/PAPSS2/RNASE4/DUSP1/FZD2/COL1A2/ST3GAL5/AQP1/COL4A5/SLC4A3/NOTCH1/FHL1/RECK/SLC29A1/KAZALD1/SPTBN1/AKAP12/RFLNB/TUBB2A/TMEM45A/AMOTL2/ABLIM1/LY6H/CITED2/LAMB2/ANXA8L1/FOS/RBMS2/COL4A2/RAB11FIP5/CTDSP2/GAS1/COPZ2/TSPAN4/PMP22/STK10/PSTPIP1/PLTP/INPP5A/TP53INP2/LASP1/APP/ITGB5/ATF3/JU…
Il22 signaling dn	Il22 signaling dn	38	0.5792215276155261	1.8068125563574597	9.242000432583529e-4	0.007225308987658626	0.005248033150360905	2994	tags=39%, list=16%, signal=33%	DPYSL5/FADS6/PRTG/GHR/ADGRA2/BGN/COL11A1/SCN3A/C7/MYL10/PDE7B/ARHGEF15/IL1RL1/SOX6/GRIPAP1
Pathways in cancer	Pathways in cancer	324	0.42795617580050693	1.8068109732771216	8.55754518958985e-8	2.6087853737731896e-6	1.8948659700399824e-6	4150	tags=37%, list=22%, signal=29%	FGF10/FGF17/CTNNA3/FGF7/KIT/COL4A4/FN1/LAMA1/TCF7L1/FGF23/PDGFRA/FGF19/ZBTB16/LAMB1/WNT6/WNT10B/TGFB2/GLI3/KRAS/PDGFRB/CDK6/WNT8A/FGF1/TGFB3/CSF3R/MMP2/MMP9/FGF2/AKT3/BMP2/MAPK10/WNT1/LAMA4/FGF4/WNT9B/FZD7/BMP4/IL6/FZD1/LAMA2/APC2/FZD2/FOXO1/BCL2/WNT4/FGF11/PPARG/CSF1R/COL4A6/GLI2/EGLN2/CCNE1/FGF22/TGFB1/WNT3A/PLCG1/EGFR/PTCH2/FGFR3/PGF/CREBBP/PTGS2/WNT7B/NOS2/ARNT2/WNT9A/PIK3CD/SUFU/PLCG2/IGF1/F…
Glycosaminoglycan metabolism	Glycosaminoglycan metabolism	124	0.47442610805209695	1.8066975338466764	6.152180851373958e-5	8.024312847159147e-4	5.828381859196382e-4	4738	tags=44%, list=25%, signal=33%	HAS1/NCAN/OMD/LYVE1/OGN/HSPG2/STAB2/XYLT1/CSPG4/GPC6/BGN/VCAN/GPC2/DCN/KERA/ACAN/PAPSS2/CHST15/HS3ST3B1/LUM/GPC1/CHST3/HS3ST4/DSE/AGRN/CHSY3/HYAL1/FMOD/CHST11/SLC26A1/GNS/NDST1/CEMIP/B4GALT6/UST/ARSB/ST3GAL2/B3GAT2/ST3GAL3/CHST2/ABCC5/CHST13/B3GNT7/CHST12/HGSNAT/SDC1/B4GALT5/CHPF/HS3ST5/SDC2/HAS2/CSGALNACT2/PRELP/HS6ST2
Ovarian cancer poor survival up	Ovarian cancer poor survival up	31	0.5956455525816045	1.8061801564346545	0.001636293442725558	0.011423013302062432	0.008296994991997375	4177	tags=52%, list=22%, signal=40%	EFEMP1/ZBTB16/ARHGAP6/PSD3/KL/THSD7A/FAT4/IGFBP5/LEPR/RECK/GULP1/KCNAB1/REV3L/HERC1/SEC63/UBL3
Hematopoiesis stem cell long term	Hematopoiesis stem cell long term	212	0.4452521431595613	1.8057288955962223	1.9321839927353324e-6	4.079758987939522e-5	2.9632933969689846e-5	5260	tags=49%, list=28%, signal=36%	PTPRZ1/CACNA1C/JAM2/HOXA10/TCF7L1/PRRX1/SLC6A15/FGF19/HOXA3/EGR3/EPHA5/ADGRD1/PLN/HAVCR1/LHX9/NPY1R/HLF/FSTL1/HOXA5/ANOS1/ANGPT1/TSBP1/GJD2/PRDM16/SYN2/CGNL1/LIX1L/PROX1/CNTN1/BICC1/FMN2/NBEA/JAM3/HSD3B2/LGI3/PLSCR4/ADAM22/LDB2/CASTOR2/FLRT3/TIE1/SKI/BEND5/KAZALD1/FKBP7/DNM1/ZBTB20/EPB41L2/ZBTB39/ARHGEF10/ZKSCAN2/TWIST2/IGF1R/SETBP1/UTRN/CBX7/PLXDC2/ABLIM1/LAMB2/MBOAT2/RNF151/PADI6/MYOM1/RORC/HP1…
Amb2 neutrophils pathway	Amb2 neutrophils pathway	41	0.5704453202315638	1.803250060555837	7.725931371225165e-4	0.006297228649749958	0.0045739309925345514	5118	tags=56%, list=27%, signal=41%	APOB/SELP/JAM2/LRP1/MYH2/CCN2/MMP2/MMP9/IL6/JAM3/ITGAM/FYN/LPA/TLN1/PLAU/PLG/SELPLG/PLAUR/ITGB2/SRC/HCK/BLK/FGR
Uv response via ercc3 ttd dn	Uv response via ercc3 ttd dn	83	0.4992115976059407	1.8019713133764619	2.0739544280111696e-4	0.002216807720562976	0.001610156800956477	6467	tags=64%, list=34%, signal=42%	NAV3/SLC16A7/HEG1/PLPP3/GPR176/DMD/COL1A2/ZEB2/DST/LRP6/AHDC1/ROR1/TEAD1/DOCK4/ZFHX3/TSC22D2/ARHGEF10/ASXL1/CREB5/CDC42BPA/RALGAPB/WDR37/UST/MITF/SKAP2/UBXN7/PCNT/GPATCH8/CTIF/TMCC1/CCND1/PLCE1/SYNJ2/HAS2/FAM168A/PDS5B/ATRN/ACVR2A/VPS13B/GSE1/BICD1/CDKN1B/MAD1L1/MSH3/SON/AVL9/MPHOSPH9/ATXN1/FAM193A/PHF14/BTAF1/NFIB/TMEM131L
Protein protein interactions at synapses	Protein protein interactions at synapses	87	0.49824247725147286	1.801703786886076	1.4950084469007893e-4	0.0016707773358856544	0.001213552923560294	4098	tags=47%, list=22%, signal=37%	LRRC4B/GRIN2C/GRIN2B/LRFN2/SLITRK3/PTPRD/SLITRK1/NLGN4Y/SYT1/LRRTM4/LIN7A/GRIA1/EPB41L3/GRM1/NLGN3/NRXN1/GRIA4/LRRTM2/LRFN1/NLGN2/SLITRK4/PPFIA2/NRXN2/PPFIBP1/LRFN3/GRIN2D/DLG4/PTPRS/EPB41L2/DLGAP3/APBA1/DLG2/DLGAP2/GRIA3/NLGN1/IL1RAPL1/SYT9/EPB41/NRXN3/DLGAP4/EPB41L1
Pi3k akt signaling in cancer	Pi3k akt signaling in cancer	104	0.48345501182792283	1.801232185288679	1.7101575757538356e-4	0.0018666804725177458	0.001355845268020715	4222	tags=40%, list=23%, signal=31%	FGF10/FGF17/FGF7/KIT/FGF23/PDGFRA/FGF19/NR4A1/NRG1/KLB/PDGFRB/FGF1/FGF2/AKT3/KL/IRS1/FGF4/FOXO1/IRS2/FGF22/FOXO6/EGFR/FRS2/FGFR3/PIK3CD/NRG2/AKT2/FGFR1/ESR1/FYN/HGF/FOXO3/GAB1/KITLG/CD28/PIK3CB/GSK3B/TSC2/MTOR/MDM2/PDGFA/PTPN11
Tgfbeta receptor signaling in skeletal dysplasias	Tgfbeta receptor signaling in skeletal dysplasias	58	0.5320229550887015	1.8010883061647724	2.538982412766835e-4	0.0026214102987123715	0.0019040359618998205	3985	tags=45%, list=21%, signal=35%	SERPINE1/ZNF423/FBN1/ADAMTSL2/LEFTY2/SMAD9/ADAMTS10/INHBA/WNT1/RUNX2/RUNX3/THBS1/BMP4/ZEB2/TGFB1/BAMBI/SKI/CREBBP/ENG/FST/LTBP1/LTBP3/FOS/JUN/TFE3/TGFBR2
A tetrasaccharide linker sequence is required for gag synthesis	A tetrasaccharide linker sequence is required for gag synthesis	26	0.6233496940002266	1.8007967637507787	0.0011138028847107702	0.008413947891539425	0.006111389497062492	2147	tags=42%, list=11%, signal=38%	NCAN/HSPG2/XYLT1/CSPG4/GPC6/BGN/VCAN/GPC2/DCN/GPC1/AGRN
Tnc targets up	Tnc targets up	156	0.4583414236004646	1.8002325490260889	1.929752539212725e-5	2.9589538934595116e-4	2.1492074802322174e-4	5442	tags=51%, list=29%, signal=37%	EYA1/CXCL12/FLRT2/PDGFRA/SLC6A15/ZCCHC24/SNCAIP/COL5A2/COL3A1/JCAD/PDGFRB/CLCA2/EDNRA/OLFML2B/ENPP2/CDH11/NR2F1/SCG2/CHST15/FOXF1/ARHGAP28/TRO/STON1/MAGED4B/COL1A2/SLC35E2B/COL4A5/MAN1A1/LDB2/BAMBI/KDM5B/TIMP4/PHF21A/PDE5A/SLC2A3/IQGAP2/ZBTB20/MAFB/SLC2A10/TNKS/RARRES1/LTBP3/VCAM1/ZNF532/PLK2/PLPP1/KLF9/KLHL24/ARID5B/WSB1/NBR1/COL18A1/TCF12/CTDSP2/SELENOP/ID2/SEMA5A/RCBTB1/TRIB2/BAZ2B/ATP9A/PROS1…
Oligodendrocyte specification and differentiation leading to myelin components for cns	Oligodendrocyte specification and differentiation leading to myelin components for cns	29	0.6040163303058428	1.7995073321863764	0.001222903385040507	0.009000568913898133	0.006537475990705267	2888	tags=52%, list=15%, signal=44%	PLP1/OLIG1/MYT1/MAG/OLIG2/FGF2/BMP2/SOX8/BMP4/GLI2/ASCL1/IGF1/SOX6/SOX10/NKX2-2
Islet hnf1a targets up	Islet hnf1a targets up	167	0.4550211439717996	1.7994173437503598	1.6872095807280675e-5	2.6582580305538236e-4	1.930799954768479e-4	3649	tags=46%, list=19%, signal=37%	CIDEA/ZFHX4/EFEMP1/DPT/CXCL12/FBN1/THBS2/SV2B/GAP43/SLC6A15/ZNF521/AEBP1/EGR3/EPHA5/MMP14/DKK3/RBMS3/BGN/DCLK1/ELAVL2/FSTL5/COL5A2/TGFB2/NEBL/HCN1/COL3A1/CEACAM4/STMN2/SERPINE2/STXBP5L/PCOLCE/PLXND1/TGFB3/NEFL/CACNG5/CYP1B1/FABP7/CCN4/MICAL1/CDH11/TGM2/ADCYAP1/NR2F1/VIM/NTM/SNAI2/TIMP2/HTRA1/POSTN/ITGA7/DUSP26/SPARCL1/PTPRO/NOTCH2/ADCY7/SNCA/MAF/FST/DNM1/NDRG2/AKAP12/EPB41L2/ABCC3/COL6A1/CNN2/VIP…
Phospholipase c mediated cascade fgfr4	Phospholipase c mediated cascade fgfr4	14	0.7298537335747364	1.7971490786879318	0.0014373577016339517	0.010242416153275407	0.007439479696161751	1930	tags=57%, list=10%, signal=51%	FGF17/FGF23/FGF19/KLB/FGF1/FGF2/FGF4/PLCG1
Hippo signaling regulation pathways	Hippo signaling regulation pathways	96	0.4893413744538546	1.7969563651520102	1.7268362270022892e-4	0.001880900685309893	0.0013661739817498917	4550	tags=40%, list=24%, signal=30%	NGFR/CDH10/NTRK2/CDH7/KIT/PRKAG3/CDH22/TCF7L1/PDGFRA/CDH20/CDH18/PDGFRB/CDH8/CDH11/LATS2/KDR/CSF1R/EGFR/TEK/FGFR3/CDH5/CDH4/TEAD1/LATS1/FGFR1/CDH3/IGF1R/GNAL/PLCB2/FLT1/TCF7L2/MTOR/EPHA2/PRKD3/CDH24/CDH2/PRKACB/PRKCI
Tretinoin response wt1 up	Tretinoin response wt1 up	23	0.6355211430320766	1.7968686126646256	0.0028430428567417705	0.01752076172001627	0.012726035451670859	4263	tags=52%, list=23%, signal=40%	KIT/TAL1/PDGFRA/DLC1/IGFBP3/CLDN11/ETV1/AKAP12/RARRES1/RARB/IGFBP6/PLAUR
Ncrnas involved in wnt signaling in hepatocellular carcinoma	Ncrnas involved in wnt signaling in hepatocellular carcinoma	86	0.49634238920746365	1.7962027767359976	1.5292841662378306e-4	0.0017053835550773385	0.0012386888154421252	4326	tags=44%, list=23%, signal=34%	SFRP1/DKK1/SFRP4/SFRP2/TCF7L1/WIF1/WNT6/WNT10B/SFRP5/CXXC4/CCND2/ROR2/NKD1/SERPINF1/WNT1/FZD7/FZD1/FZD2/WNT4/DKK2/KLF4/WNT3A/LRP6/ROR1/WNT7B/NKD2/FZD10/WNT2B/APC/FZD8/PLAU/GSK3B/TCF7L2/JUN/WNT5A/CCND1/WNT5B/CCND3
Brain hcp with h3k27me3	Brain hcp with h3k27me3	264	0.4342018787464316	1.7923236667721354	1.1209556089709336e-6	2.5441248006247794e-5	1.847900389469821e-5	3519	tags=39%, list=19%, signal=32%	OLIG3/IGF2BP1/SIX6/FGF17/EMILIN3/TNXB/NKX2-1/GBX2/NKX2-4/FOXE1/DHH/HOXD13/HOXA4/SIM2/GPR50/LBX2/HOXA10/FOXC2/MYOD1/GDF7/TBX1/HMGA2/HAND2/RBMXL2/CRLF1/PAX2/NKX3-2/ALX4/IGF2/KCP/HOXC13/AEBP1/IRX4/NKX6-1/THBS4/CYP26A1/COL8A2/WNT10B/SLC18A3/HOXD12/FEV/WDR86/ALDH1A3/SFRP5/PKP1/BARX1/HOXA5/BHLHE23/MMP2/ECEL1/LHX1/COL13A1/GATA4/FGF4/GATA3/MAFA/NOTCH3/RSPO4/IGF2BP3/GATA5/HOXD11/SCNN1B/KCNE5/EVX1/LMX1B/CA…
Targets of nup98 hoxa9 fusion 8d dn	Targets of nup98 hoxa9 fusion 8d dn	196	0.4454428946904421	1.7922583430892602	3.156732387115645e-6	6.37783735624306e-5	4.632480345178997e-5	4943	tags=52%, list=26%, signal=38%	CD1E/BPI/CD1A/OLIG1/MS4A2/LGALS12/KLF2/PDK4/PAX2/TMCC3/MMP14/C9/CDH8/SLC16A7/MARCO/ANTXR1/MMP9/CD163/ATP6V0D2/F5/IGF2R/TGFBI/COLEC12/ANKRD29/BCL2/HTRA1/PADI4/GASK1B/IL7R/CYTL1/ST8SIA1/C5AR1/PADI2/MRC1/SLCO2B1/SRPX/FCAR/GSDME/RPS6KA2/PID1/DACH1/CR1/C10orf82/CST7/FPR1/MAF/DAB2/DOCK4/ITGAM/NDRG2/EPAS1/CAMK1D/TEX15/SOBP/AKAP13/CLEC4A/CREB5/S100B/EMP1/S100A12/PLXDC2/RAPH1/HTR2C/CYBB/SGK1/ALDH2/ADAM19/…
Lncrna in canonical wnt signaling and colorectal cancer	Lncrna in canonical wnt signaling and colorectal cancer	94	0.4903987580002911	1.7912486796208522	1.1440091107401402e-4	0.0013425819905542602	9.751714155811531e-4	4731	tags=46%, list=25%, signal=34%	SFRP1/DKK1/SFRP4/SFRP2/TCF7L1/WIF1/WNT6/WNT10B/SFRP5/CXXC4/CCND2/CDK6/ROR2/NKD1/SERPINF1/WNT1/FZD7/FZD1/APC2/FZD2/WNT4/DKK2/WNT3A/LRP6/ROR1/WNT7B/NKD2/FZD10/WNT2B/APC/FZD8/PLAU/GSK3B/TCF7L2/JUN/WNT5A/CCND1/WNT5B/CCND3/MAP3K7/KREMEN1/ATF3/AXIN2
Glioblastoma proneural	Glioblastoma proneural	176	0.44796017939659466	1.7905123763315194	9.114462484327695e-6	1.6040790586401894e-4	1.1651072763701116e-4	4283	tags=43%, list=23%, signal=33%	PCDH11X/ADGRB3/CA10/SOX11/ADGRL3/GPR17/MYT1/FLRT1/CRB1/PDE10A/MMP16/SORCS3/OLIG2/CXXC4/SCN3A/C1QL1/GABRA3/LRRTM4/DPP6/SCG3/MAPT/NLGN3/ZC4H2/NRXN1/PCDH11Y/CNTN1/ZEB2/SEZ6L/KIF21B/DUSP26/EPHB1/GNG4/TMEFF1/LRP6/ZNF804A/MAP2/MLLT11/NRXN2/FXYD6/ASCL1/SATB1/DGKI/LPAR4/STMN4/PAK3/SOX10/CDK5R1/NKX2-2/AMOTL2/PURG/MARCKS/ARHGAP33/CRMP1/P2RX7/IL1RAPL1/GRIA2/ZFP69B/RAB33A/EPB41/ZNF711/WASF1/KLRC4/PODXL2/GSK3…
Interactions between loxl4 and oxidative stress pathway	Interactions between loxl4 and oxidative stress pathway	18	0.6789208315133728	1.7895762729561717	0.002063155687374544	0.01361774062482918	0.009891113910033455	1838	tags=33%, list=10%, signal=30%	COL2A1/FGF7/FN1/BMP2/PKD1/TGFB1
Thoc1 targets dn	Thoc1 targets dn	20	0.6552337397273589	1.789467460677497	0.0028100519887169486	0.017338189036969723	0.012593425552964076	2119	tags=45%, list=11%, signal=40%	DHH/KIT/AMHR2/NR5A1/GATA4/SOX8/CLDN11/NOTCH1/MAGEA4
Uv response via ercc3 xpcs dn	Uv response via ercc3 xpcs dn	83	0.4954839844669015	1.7885159930751575	2.5797869197727427e-4	0.002652906628876082	0.0019269130160294362	6323	tags=57%, list=34%, signal=38%	DKK1/NAV3/HEG1/GRK5/IL6/SLIT2/ZEB2/DST/AHDC1/DOCK4/MYO9B/TSC22D2/ADCY9/ARHGEF10/IGF1R/ASXL1/PTX3/RALGAPB/WDR37/DUSP5/UBXN7/NFATC3/PCNT/GPATCH8/CTIF/RANBP2/TMCC1/TGFBR3/PLCE1/CDH2/FAM168A/PDS5B/ATP2C1/BTRC/ATRN/VPS13B/GSE1/BICD1/CDKN1B/SON/AVL9/MPHOSPH9/DLG1/FAM193A/PHF14/BMPR1A/AGFG1
S1p s1p1 pathway	S1p s1p1 pathway	21	0.6438094523846462	1.7884665532935469	0.0035634383487826923	0.0209098341377317	0.015187655352982225	3532	tags=43%, list=19%, signal=35%	GNAO1/PDGFRB/KDR/PLCG1/GNAZ/PTGS2/S1PR1/SPHK1/PLCB2
Silenced during tumor angiogenesis	Silenced during tumor angiogenesis	76	0.5053404077369903	1.7884160113687326	1.4348372600677816e-4	0.0016175670818094554	0.0011749041712636103	2101	tags=29%, list=11%, signal=26%	COL2A1/FABP4/ABI3BP/GABRA1/LRP1/SLCO1A2/FBN1/CLIP3/NUAK1/DKK3/VCAN/SERPINE2/INHBA/PDLIM3/IGFBP3/OLFML3/DMD/IGF2R/IL6/CNN1/CREB3L1/P3H2
Other semaphorin interactions	Other semaphorin interactions	19	0.6666254137386919	1.78815980216087	0.00272352307758753	0.016844646933650606	0.012234946029978733	4078	tags=58%, list=22%, signal=45%	SEMA6A/PLXNB3/PLXNA4/PLXND1/PLXNA1/PLXNC1/SEMA7A/SEMA3E/PTPRC/ITGB1/SEMA5A
Wnt signaling	Wnt signaling	135	0.46418095892772726	1.7858657995141196	2.864517760609446e-5	4.16892528323725e-4	3.0280584712954453e-4	4621	tags=42%, list=25%, signal=32%	SFRP1/DKK1/SFRP4/CAMK2A/SFRP2/TCF7L1/WIF1/WNT6/WNT10B/VCAN/SFRP5/CXXC4/CCND2/ROR2/NKD1/SERPINF1/WNT1/NFATC2/FZD7/PRICKLE2/FZD1/FZD2/WNT4/DKK2/WNT3A/VANGL2/LRP6/ROR1/WNT7B/PRICKLE1/CAMK2B/NKD2/MSX2/DAAM2/FZD10/CITED2/GJA1/NCOA3/WNT2B/APC/PLCB2/FZD8/PLAU/ROCK2/NFATC3/GSK3B/TCF7L2/JUN/NFATC1/WNT5A/ID2/CCND1/WNT5B/CCND3/NFATC4/MAP3K7/KREMEN1
Calcium regulation in cardiac cells	Calcium regulation in cardiac cells	150	0.4567788259739236	1.7847333468124704	2.0236810392154672e-5	3.084616779301209e-4	2.2404814993494195e-4	4028	tags=38%, list=21%, signal=30%	ADRA1A/CACNA1C/ADRB3/SLC8A3/ATP1B2/CAMK2A/ADCY1/RGS4/GNAO1/GJB6/ADCY5/PLN/GRK5/ADCY2/RGS2/ITPR1/GJD2/GNG2/ADRB2/RGS17/GNB3/ITPR3/GJB2/GJC1/ADCY7/RGS1/PRKD1/GNG4/ATP1A4/GJC2/GNAZ/RYR1/KCNB1/ADCY6/CAMK2B/RGS16/GNG11/ADCY9/ITPR2/ADRB1/CACNB3/ANXA6/GJB4/PKIA/SLC8A1/ADRA1D/ATP2A3/GJA1/ADCY4/CACNA1S/CASQ2/ADRA1B/CACNA1D/CAMK4/GNGT1/KCNJ5/GNG3
Targets of nup98 hoxa9 fusion 6hr dn	Targets of nup98 hoxa9 fusion 6hr dn	42	0.5615917769106443	1.7836677874068305	8.608869632663074e-4	0.006818165186227011	0.004952308196517863	3275	tags=36%, list=17%, signal=30%	SERPINE1/CACNA1G/SLC1A6/HTRA3/INHBA/ATP6V0D2/VASH1/GAS7/AQP1/KDM6B/RHOB/ZFP36/HIP1R/P2RX7/PTPRC
Adipocyte differentiation dn	Adipocyte differentiation dn	31	0.5882098193405931	1.7836327307546547	0.0022259348989979912	0.014455875107627447	0.010499884767819464	2786	tags=42%, list=15%, signal=36%	FN1/THBS2/PSG9/PTGDS/COL3A1/COL6A3/LOX/DCN/MMP9/SPARC/LUM/LOXL1/COL6A1
Ilf3 targets dn	Ilf3 targets dn	46	0.5475816633582764	1.782888825743077	6.592764651384624e-4	0.005540933684165348	0.004024603474829972	2853	tags=41%, list=15%, signal=35%	COL2A1/NPTX2/THBS4/MN1/CELF2/ACKR3/ROR2/CDH11/DMD/AXL/CYP19A1/IGFBP5/NT5E/TEK/CREBBP/NDN/MSX2/HCFC1/MAPK7
Prox1 targets dn	Prox1 targets dn	56	0.530630746078774	1.7822264460465949	7.488448169282287e-4	0.00613362241146937	0.004455097187147273	4480	tags=45%, list=24%, signal=34%	SERPINE1/SELP/RGS4/MMP14/NUAK1/VCAN/BMP6/FAP/AXL/IL6/ITGA5/IGF2BP3/SRPX/MLLT11/TCN2/LTBP2/TRAM2/ANXA6/CAP2/PLA2G4A/PLAU/PFKM/KRT7/CDH2/PRKACB
Tgfb1 targets 10hr dn	Tgfb1 targets 10hr dn	250	0.4337217424490881	1.7815567414785924	1.1544563212195937e-6	2.6086662135628713e-5	1.8947794191762034e-5	4424	tags=40%, list=24%, signal=31%	FOXP2/ZIC1/ZFHX4/EYA1/CAVIN2/FGF7/SIM2/OGN/PDK4/CD36/MMP16/PTPRD/PRRX1/ADAMTS5/PDGFRA/ZNF521/UNC5C/DCLK1/CELF2/PRSS35/STMN2/PEG3/PLPP3/RSPO2/EPHA7/CYP1B1/OSR1/LAMA4/IRS1/LILRB5/THBD/LPL/THSD7A/ARHGAP28/FAT4/PRICKLE2/EYA4/RTL3/SHOX2/SBK1/PLEKHH2/IGFBP5/AQP1/SYT11/MRGPRF/LRRN3/MRC1/MAN1A1/SVIL/LUM/CD93/LDB2/FBXL7/MAP2/CYP7B1/MED12L/DDIT4L/PWWP3B/ZNF608/ARNT2/DAB2/GULP1/LPAR4/IGF1/PDE5A/RCBTB2/VEGFD…
Response to tnf troglitazone dn	Response to tnf troglitazone dn	38	0.5705840069645347	1.7798688396205236	0.0012347254665874172	0.009044434222575642	0.00656933713248946	1706	tags=26%, list=9%, signal=24%	ADIPOQ/AOC3/ADRB3/CFD/FXYD1/RGS2/SLC2A4/LPL/PPARG/RASD1
Cell adhesion molecules cams	Cell adhesion molecules cams	130	0.4646666035631333	1.7798154614036228	2.7643796117826115e-5	4.0345846345337153e-4	2.9304814432345864e-4	4643	tags=43%, list=25%, signal=33%	NEGR1/CLDN19/SELP/JAM2/MAG/CD22/SELE/VCAN/CLDN5/CNTNAP1/L1CAM/NLGN3/NRXN1/CNTNAP2/CNTN1/CLDN11/CLDN15/JAM3/CLDN14/NLGN2/ITGA8/NRXN2/CDH5/MPZ/CDH4/CNTN2/CLDN20/ITGAM/SPN/CDH3/CLDN9/CLDN18/PDCD1/SIGLEC1/CD34/VCAM1/PTPRC/ITGA4/ICOSLG/ITGB1/CD28/NLGN1/CD8A/CLDN8/PECAM1/SELPLG/NRXN3/CD6/NCAM1/SDC1/CDH2/SDC2/ITGB2/GLG1/NFASC/CD4
T lymphocyte and nk progenitor up	T lymphocyte and nk progenitor up	78	0.4975925040792514	1.7793960883759117	3.201056985890023e-4	0.003141303922153409	0.0022816556561080768	3426	tags=36%, list=18%, signal=29%	TAL1/HMGA2/COL5A1/PTPRD/TIMP3/HLF/CAVIN1/LOX/GRK5/ID3/GATA3/FOXO1/TRO/CCDC88A/SERPINI1/ARMCX1/CFH/CACNB2/DACH1/MPDZ/ASAP2/FAM124B/CHN2/RASA1/PLXDC2/FOXO3/KLF9/MYH10
Interaction between l1 and ankyrins	Interaction between l1 and ankyrins	31	0.5863303321017401	1.777933548513848	0.0024323100801753165	0.01547685200043959	0.011241461437880589	3096	tags=58%, list=16%, signal=49%	SCN4A/SCN7A/SCN10A/SCN11A/SCN3A/SCN5A/L1CAM/SPTA1/SCN2A/SCN8A/ANK1/SPTB/SPTBN1/SCN4B/SPTBN4/SCN1B/ANK2/KCNQ3
Ulcerative colitis with cancer up	Ulcerative colitis with cancer up	18	0.674259973862565	1.7772906574965324	0.0023151395403951942	0.014909498640145052	0.010829369823822259	2491	tags=39%, list=13%, signal=34%	FBN1/SLC35D3/MN1/CDKN1C/ANGPTL2/LRP6/EDIL3
Hdac1 and hdac2 targets dn	Hdac1 and hdac2 targets dn	220	0.43561902399580976	1.7761219509131845	2.667345527197286e-6	5.4968656624481675e-5	3.992595094394254e-5	4624	tags=43%, list=25%, signal=33%	PDE1C/CAVIN2/COL4A4/COL16A1/CCDC80/ITGBL1/DTNA/KRT81/CSDC2/CXCL14/RBMS3/TIMP3/MN1/CELF2/COL5A2/RHOBTB3/TGFB2/COL3A1/NANOS1/FSTL1/ACKR3/DACT1/COL1A1/PCOLCE/GLT8D2/FGF1/LOX/EPB41L3/KATNAL1/ACADL/CNRIP1/OLFML3/ALPK2/EBF1/DUSP1/TFPI/PRICKLE2/CAV1/CCL26/IGFBP5/AQP1/GLI2/LUM/MGAT5B/SCEL/GPC1/TCF4/MAF/TMEM200C/EDIL3/TUBA1A/TMEM255A/ZNF219/RHOBTB1/SPTBN1/MYLK/LOXL1/ABCC3/FGFR1/FIGN/PLEKHG4/CAP2/TMEM45A/A…
Growth spherical vs adherent up	Growth spherical vs adherent up	22	0.6329608503045486	1.7759435765501697	0.003583097585913371	0.021001272767492248	0.015254070915420675	3104	tags=55%, list=17%, signal=46%	ADGRL3/PTPRZ1/OLIG1/OLIG2/ADGRB2/CCND2/PCSK1N/MAGED4B/VANGL2/MAP2/ADGRB1/CRMP1
Taste transduction	Taste transduction	48	0.5444445072153099	1.7758052036645473	7.162944370245712e-4	0.005933036880306416	0.004309403830804453	3690	tags=54%, list=20%, signal=44%	TAS1R2/TAS2R13/GNAT3/ASIC2/TAS2R9/SCNN1G/GNB3/ITPR3/TAS2R38/TAS2R31/SCNN1B/TAS2R43/TAS1R3/TAS2R46/TAS2R19/TAS2R40/TAS2R3/KCNB1/ADCY6/TAS2R50/TAS2R20/TAS1R1/ADCY4/TAS2R8/PLCB2/TRPM5
Resistance to tamoxifen and aromatase inhibitors dn	Resistance to tamoxifen and aromatase inhibitors dn	19	0.66188078631296	1.7754327865624975	0.0034095146648596823	0.02026046084585592	0.014715989356615276	3499	tags=63%, list=19%, signal=51%	FBN2/EFEMP1/CCN5/CCN2/ACTG2/L1CAM/SNAI2/APOD/NT5E/EPAS1/KRT17/CALD1
Methylated in cancer	Methylated in cancer	56	0.5286035856579052	1.775417833957775	8.60818564196392e-4	0.006818165186227011	0.004952308196517863	3411	tags=48%, list=18%, signal=40%	SFRP1/GFAP/SFRP4/HIC1/TIMP3/VCAN/SFRP5/CCND2/HOXA5/BMP2/GATA4/RUNX3/TIMP2/GATA5/TWIST1/SEZ6L/APOD/CALCR/PTGS2/DRD4/DAB2/CDX1/ESR1/CDKN2B/BRCA1/RARB/APC
O linked glycosylation	O linked glycosylation	110	0.47518838630806703	1.7741551844494878	5.6498342005650186e-5	7.502047886935819e-4	5.449039767500988e-4	3600	tags=35%, list=19%, signal=29%	MUC7/GALNT15/GALNT9/ADAMTS16/ADAMTSL1/THBS2/ADAMTS5/ADAMTSL2/ADAMTS7/ADAMTSL4/GALNT13/MUC17/ADAMTS4/ADAMTS19/ADAMTS10/ADAMTS2/ADAMTS9/THBS1/GALNT10/THSD7A/GALNT5/ADAMTS12/ADAMTSL3/ADAMTS18/GCNT3/B3GNT9/A4GNT/MUC3A/GALNTL5/ST6GALNAC3/SPON2/B4GALT6/ADAMTS14/POMK/MUC4/GCNT7/GALNT16/ST3GAL2/ADAMTS6
Parp1 targets up	Parp1 targets up	31	0.5850085299006451	1.7739254384960663	0.0024617922678075222	0.015600435133756894	0.011331224848910134	1749	tags=42%, list=9%, signal=38%	FGF7/ELN/COL8A1/TIMP3/CCND2/SERPINE2/GPX3/DCN/IGFBP4/CAV1/TIMP2/MGP/COL4A5
Signaling	Signaling	88	0.49066547290058526	1.7738963107975927	2.7656824382717404e-4	0.002799370515122988	0.002033295640172896	4326	tags=41%, list=23%, signal=32%	SFRP1/DKK1/SFRP4/TCF7L1/WIF1/WNT6/CXXC4/CCND2/WNT8A/NKD1/CCN4/WNT1/FGF4/FZD7/FZD1/FZD2/PYGO1/WNT4/WNT3A/FOXN1/LRP6/WNT7B/WNT9A/FRZB/TLE2/WNT2B/APC/FZD8/BCL9/GSK3B/JUN/WNT5A/RHOU/CCND1/WNT5B/CCND3
Secreted factors	Secreted factors	320	0.4199260390953247	1.7727421265056555	1.9747653465560598e-7	5.5595579592660215e-6	4.038131036529648e-6	3394	tags=36%, list=18%, signal=30%	ANGPTL1/SCUBE3/WFIKKN2/FGF10/FGF17/CBLN2/SFRP1/ANGPTL7/CCL14/DHH/IFNA1/CBLN4/FGF7/TCHHL1/SFRP4/CXCL12/GDF7/SCUBE1/SFRP2/FGF23/LEP/CRLF1/CXCL14/FGF19/IGF2/CHRDL2/WIF1/NRG1/WNT6/IL36B/NODAL/LEFTY2/GDF6/WNT10B/BRINP3/BMP3/ISM1/FGFBP2/TGFB2/CCL21/TNFSF4/BMP6/SFRP5/FLG2/FSTL1/WNT8A/CCL18/NGF/IL36RN/FGF1/ANGPT1/PDGFD/ANGPT4/TGFB3/INHBA/FGF2/MEGF8/BMP2/WNT1/CCBE1/THPO/CCL16/IFNK/FGF4/WNT9B/ANGPTL2/GDF5/…
Targets of pax foxo1 fusions dn	Targets of pax foxo1 fusions dn	66	0.5126310436352933	1.7724039983268842	9.734142567262888e-4	0.007541398873163669	0.005477621974929889	4865	tags=48%, list=26%, signal=36%	SOX11/TRIL/ACTC1/COL11A1/NEFM/EDNRA/RGS2/ITPR1/IGFBP3/OLFML3/MOXD1/LRRN3/SPARCL1/RADX/KLHL41/ARHGEF6/GREM2/TCF4/SPOCK2/PKIA/MSTN/PLK2/TTN/MICAL2/REEP1/TNNC2/WDR7/TRIB2/SPRY4/PPFIA4/ATP2B4/ZFP36L2
Response to sodium butyrate dn	Response to sodium butyrate dn	58	0.5235074916669835	1.7722604117219978	4.339332998847017e-4	0.003970913607470663	0.0028842346098721418	1700	tags=28%, list=9%, signal=25%	HSPG2/THBS4/TIMP3/FSTL1/C7/COL6A3/DPP6/GRM3/CDH11/IL11/ALPK2/IL6/THSD7A/ELANE/AQP1/ELK3
Mmp14 targets subset	Mmp14 targets subset	33	0.5802886866517443	1.7722036830426449	0.0020392536901516086	0.013565961416088604	0.009853504583645594	4639	tags=67%, list=25%, signal=50%	EFEMP1/FN1/COL5A1/LAMB1/TIMP3/SULF2/PLXND1/ANKRD1/LAMA4/ANGPTL2/COL6A2/LOXL3/GJB2/COL6A1/CALD1/COL18A1/P3H1/COL4A2/COL4A1/NR3C1/HAS2/HHIP
Skil targets up	Skil targets up	20	0.6488804647294781	1.7721164328104428	0.0034257785234300445	0.020314191724208206	0.014755016259308633	3849	tags=50%, list=21%, signal=40%	SERPINE1/FN1/ECM2/MMP16/DCN/ENPP2/EGFR/IGFBP1/PLAU/PPP1R15A
Smarca2 targets dn	Smarca2 targets dn	285	0.42432785446132526	1.7703117551333019	5.208951744837669e-7	1.254042962121667e-5	9.108619504622684e-6	2942	tags=29%, list=16%, signal=25%	SMR3B/SCN4A/IVL/SLC1A7/SSX3/COL11A2/XPNPEP2/TNR/GABRA1/CHRND/MYT1/SLC7A10/FLRT1/CAMK2A/TF/HTR6/CAMKV/CD22/FGF23/GABRG2/ALAS2/ADRA2B/VRTN/SULT1B1/AQP6/WNT10B/AMHR2/CTXND1/RHO/CDH18/OR3A3/MEPE/PAX4/RGR/KCNJ10/DPPA4/CYP2A6/LZTS1/FGF1/LILRA4/PRX/CCKAR/GPR21/SEMA6B/GJD2/FABP7/PRDM16/RUNX2/CCL16/GDF5/IL11/SCN2A/NLRP3/MAP1A/RUNDC3A/ASIC4/PADI4/USH1C/MMP19/FBLN1/TP53TG5/CLCNKA/EFNB3/CEACAM3/TSHZ2/PHF24/A…
Wt1 targets 12hr up	Wt1 targets 12hr up	165	0.4479967175442566	1.7701006916357551	1.6312805601637248e-5	2.593937483322071e-4	1.8840813487271092e-4	5942	tags=49%, list=32%, signal=34%	LRP4/SERPINE1/CSDC2/PDGFRA/CXCL14/ZCCHC24/CSPG4/TIMP3/MN1/PCDHGC3/C9/HSPA6/FGF1/HEG1/PSD3/IL11/BHLHE41/FZD7/SNAI2/HTRA1/SYNC/AQP1/ST8SIA1/GPR183/GLI2/KIF3C/CREB3L1/FGFR3/MED13L/EPS8/DAB2/CALCOCO1/TMEM255A/MYLK/FGFR1/TBX3/AAK1/KLF9/CX3CL1/SLC17A7/NFAT5/SUPT6H/SH3BP5/PLAU/CDC42EP3/PJA2/MYCN/NYNRIN/NPPB/TLE3/MTUS1/ENO2/TRIB2/ZMYND8/ATP9A/EPOR/GGT1/ITGB5/OGA/KIF5B/RIPOR1/ATP2B4/C1orf116/GRB10/RBFOX2/…
Melanoma metastasis dn	Melanoma metastasis dn	41	0.5598358888933288	1.7697123015023153	0.0013170742896604724	0.009557136253986976	0.006941733283532957	3371	tags=32%, list=18%, signal=26%	PI16/CD1A/HOXA9/CXCL14/PTGDS/STMN2/CD1C/CLEC10A/DPYSL2/P2RY14/TXNIP/CRY2/TOM1L2
Wound blood vessel up	Wound blood vessel up	49	0.540056565277881	1.7696030686528246	0.0022925112912674725	0.014800774652393506	0.010750399209149011	3247	tags=45%, list=17%, signal=37%	COL5A2/VCAN/COL3A1/MCTP1/HEG1/ANGPTL2/NID2/KDM5D/SLCO2A1/POSTN/CCN1/LUM/KCNJ8/FBXL7/HYAL1/CDH5/RAB31/SULF1/GNA12/ANXA6/PLXDC1/BMP1
Hoxc6 targets dn	Hoxc6 targets dn	21	0.6364967106664503	1.7681521669057343	0.004659857361779114	0.02604775960558273	0.018919537716134076	3097	tags=62%, list=17%, signal=52%	PDGFRA/RFLNA/DCN/COL23A1/ARMH4/CNTN1/ZNF536/ERRFI1/APBB1/CYRIA/MEGF10/PLXDC1/VCAM1
Serum response 60 mcf10a	Serum response 60 mcf10a	58	0.5222392809916939	1.767967064235447	4.5476166414473067e-4	0.004103208570356659	0.0029803257738676707	3888	tags=41%, list=21%, signal=33%	SERPINB13/FN1/VGLL3/EGR3/CCN2/TNC/INHBA/PTGER4/IRS2/CYBRD1/CCN1/EGR1/PTGS2/RHOB/MAFB/PLK2/KLF7/BMP1/DUSP5/SGK1/CALD1/MBNL2/TNFAIP3/GAS1
Influence of laminopathies on wnt signaling	Influence of laminopathies on wnt signaling	35	0.5684843519635236	1.7672081317863217	0.0016738323507615093	0.011637765548074623	0.00845297820435708	1697	tags=23%, list=9%, signal=21%	ADIPOQ/TCF7L1/HMGA2/WNT10B/CDK6/SLC2A4/RUNX2/PPARG
Arrhythmogenic right ventricular cardiomyopathy	Arrhythmogenic right ventricular cardiomyopathy	74	0.5020996217861745	1.7663743381383392	3.824234957033839e-4	0.003575763792856323	0.0025972213720995892	3818	tags=39%, list=20%, signal=31%	CTNNA3/SGCA/CACNA1C/CACNB4/TCF7L1/CACNA2D2/ACTN3/DES/ITGA11/CACNG5/DMD/ITGA10/LAMA2/ITGA5/CACNA2D1/ITGA7/CACNB2/ITGA8/CACNG4/CACNB3/SLC8A1/SGCD/GJA1/ITGA4/ITGB1/CACNA1S/DSG2/CACNA1D/TCF7L2
Arrhythmogenic right ventricular cardiomyopathy arvc	Arrhythmogenic right ventricular cardiomyopathy arvc	74	0.5020996217861745	1.7663743381383392	3.824234957033839e-4	0.003575763792856323	0.0025972213720995892	3818	tags=39%, list=20%, signal=31%	CTNNA3/SGCA/CACNA1C/CACNB4/TCF7L1/CACNA2D2/ACTN3/DES/ITGA11/CACNG5/DMD/ITGA10/LAMA2/ITGA5/CACNA2D1/ITGA7/CACNB2/ITGA8/CACNG4/CACNB3/SLC8A1/SGCD/GJA1/ITGA4/ITGB1/CACNA1S/DSG2/CACNA1D/TCF7L2
Transcriptional regulation of white adipocyte differentiation	Transcriptional regulation of white adipocyte differentiation	83	0.48889504587618254	1.7647323342358714	3.355399363423792e-4	0.0032312182281045566	0.0023469640407223972	5014	tags=43%, list=27%, signal=32%	ADIPOQ/FABP4/PLIN1/CD36/LEP/WNT10B/SLC2A4/WNT1/LPL/EBF1/CDK19/PPARG/NCOR2/KLF4/TGFB1/MED13L/CREBBP/ANGPTL4/FAM120B/NCOA6/NCOA3/PPARA/MED21/EGR2/RXRA/MED29/MED23/CCND3/MED1/NCOR1/NCOA2/MED24/NCOA1/NR2F2/ZNF638/MED12
Pi 3k cascade fgfr1	Pi 3k cascade fgfr1	20	0.6461566821835838	1.76467768242212	0.0034875026076210806	0.020581458687816506	0.01494914302778434	3278	tags=55%, list=17%, signal=45%	FGF10/FGF17/FGF23/FGF1/FGF2/KL/FGF4/FGF22/FRS2/FGFR1/GAB1
Mir302a targets	Mir302a targets	77	0.4942393175464671	1.7635602892282602	3.412702254621867e-4	0.0032680747241285984	0.002373734399370131	3291	tags=32%, list=18%, signal=27%	SOX11/ZFHX4/MYT1/SLITRK3/EPHA4/CCND2/FOXG1/NANOS1/HLF/DLL1/CDK6/SASH1/WNT9B/NEUROD1/TWIST1/TSHZ3/EFNB3/RORB/MAP1B/KAT6A/RB1/RARB/ZFPM2/KLF9/TNFSF11
Negative regulation of fgfr1 signaling	Negative regulation of fgfr1 signaling	32	0.5796829957971237	1.7631162163107457	0.0033855898763100988	0.020141523144052688	0.014629600109739153	3055	tags=38%, list=16%, signal=31%	FGF10/FGF17/FGF23/ANOS1/FGF1/FGF2/KL/FGF4/FGF22/FRS2/FGFR1/SPRY2
Purinergic signaling	Purinergic signaling	33	0.5771974420996072	1.7627630113450927	0.0023033254130902835	0.014851980636096546	0.010787592179086963	3500	tags=39%, list=19%, signal=32%	P2RX2/GNAT3/GNAO1/P2RX6/P2RY12/ADORA2A/GNAZ/P2RY14/P2RY8/LPAR4/P2RY13/P2RX7/GNAT1
Foxp3 targets in t lymphocyte dn	Foxp3 targets in t lymphocyte dn	38	0.5650235556179113	1.7625236740265358	0.001590049937644457	0.011145492896250669	0.008095420735160824	5714	tags=58%, list=30%, signal=40%	BACH2/BCL11B/BCL2/ST8SIA1/SATB1/ANKRD44/ABTB2/RCBTB2/PTGER3/WIPF1/UTRN/PTPRC/TESPA1/MS4A4A/LRCH1/TGFBR2/STK10/WNK1/JAK1/CDK17/GFI1/FOXP1
Downstream signaling of activated fgfr4	Downstream signaling of activated fgfr4	26	0.6095214606315991	1.760848339714806	0.00181221220942021	0.012382648942881859	0.00899401703823656	2039	tags=38%, list=11%, signal=34%	FGF17/FGF23/FGF19/KLB/KRAS/FGF1/FGF2/FGF4/PLCG1/FRS2
Glioblastoma signaling pathways	Glioblastoma signaling pathways	82	0.48809906015397325	1.7608384054505637	4.5072782750077867e-4	0.00408110679663271	0.0029642723647493635	6308	tags=56%, list=34%, signal=37%	PDGFRA/KRAS/CCND2/PDGFRB/CDK6/AKT3/IRS1/FOXO1/CCNE1/PLCG1/EGFR/ERRFI1/PIK3CD/PLCG2/AKT2/FGFR1/IGF1R/CDKN2B/BRCA1/NF1/SPRY2/FOXO3/RB1/GAB1/PIK3CB/TSC2/MDM2/CCND1/PRKCI/SRC/MAP2K6/PDPK1/PRKCH/PIK3CG/RAF1/CDKN1B/MDM4/PRKCG/FOXO4/EP300/NRAS/PIK3CA/PIK3C2B/TSC1/ERBB2/ERBB3
Esr1 targets not via akt1 dn	Esr1 targets not via akt1 dn	88	0.48704580313506635	1.7608101671865453	3.402620416351197e-4	0.0032644879674192493	0.002371129193399688	5331	tags=47%, list=28%, signal=34%	PDK4/LAMB1/TGFB2/EPHA4/ENPP1/DLL1/CDK6/SASH1/ATP8B2/PSD3/CHST15/GATA3/FRMD6/PPARG/IGSF3/PLEKHF1/TSC22D3/RERE/MAP3K5/TRAM2/CDH3/ESR1/CLDN9/SLC22A23/MEF2D/SEMA3E/KLF9/TNFRSF19/ARID5B/RXRA/TCF7L2/PBX1/BTG2/S1PR3/GTF2IRD1/CDYL2/HBP1/PTPRK/SNTB2/ZKSCAN1/DDIT4
Mll af4 fusion targets f up	Mll af4 fusion targets f up	180	0.4392015813449673	1.7601820254849596	4.2228689601132236e-5	5.832766992628238e-4	4.2365737697763544e-4	3359	tags=34%, list=18%, signal=28%	OTOR/ADGRL3/BMPER/CACNA1G/NR4A3/RGS4/OGN/NUAK1/DKK3/ADAMTSL4/ADAMTS4/LHX9/EPHA4/COL3A1/SCN3A/MME/RRAD/ADAMTS2/LOX/IL17RD/TGFB3/ACTG2/PLAC9/OSR1/OLFML3/BMP4/C1QTNF1/ARHGAP28/FAM43A/TCP11L2/COL6A2/ST3GAL5/NT5E/MFAP2/FBLN1/EGFR/AFAP1L2/CNN1/TEK/KLHL30/BHLHE22/FMOD/PRICKLE1/DAB2/FST/ATP8B4/PLCG2/LTBP2/DYSF/RCBTB2/JARID2/COL6A1/OR51B2/PLXDC2/ABLIM1/LY6H/ARSB/TLE2/FBLN7/CX3CL1/CDA
Cgmp effects	Cgmp effects	16	0.6840774641386889	1.7591450754131976	0.0030554244033747704	0.018519466501396256	0.013451434989470353	2949	tags=56%, list=16%, signal=47%	PDE10A/IRAG1/ITPR1/PRKG1/KCNMB2/PDE1B/PDE5A/KCNMB1/PDE2A
Es icp with h3k4me3 and h3k27me3	Es icp with h3k4me3 and h3k27me3	136	0.4562424873320601	1.7585061891552534	9.35841944050369e-5	0.0011490233032648825	8.345819391767444e-4	4029	tags=45%, list=21%, signal=35%	FGF10/NCAN/PTGFR/CNMD/DKK1/OPCML/PROKR1/PDE1C/COL4A3/ADAMTS16/COL4A4/TSPAN11/SLITRK1/GPAT2/VRTN/FXYD5/AQP6/BRINP3/NR5A1/NPY1R/RFLNA/WNT8A/PAPLN/TGFB3/HSPA12B/CNTNAP1/PIWIL2/GRM3/LAMA4/ISLR2/PVALB/FIBIN/ADAM33/COL1A2/LOXL3/PHYHIP/AVPR1B/RHOJ/CHST3/KCNN3/ZNF608/ISLR/PCARE/IGF1/GGT7/ABCC3/TNFRSF13C/CCDC38/PDE8B/SGCD/RGS8/CLEC14A/PCDH20/GNAT1/TMEM26/EXTL1/SLFN5/MCHR1/HOXB13/KCNJ5/PAMR1
Methylated in adult cancers	Methylated in adult cancers	27	0.6000862336445381	1.7577224124463842	0.0020088071796431927	0.013413154637133228	0.009742514860863158	3235	tags=48%, list=17%, signal=40%	SFRP1/SFRP4/SFRP2/HIC1/TIMP3/SFRP5/GATA4/THBS1/GATA5/ESR1/CDKN2B/BRCA1/RARB
Cell surface interactions at the vascular wall	Cell surface interactions at the vascular wall	136	0.45587219251529615	1.7570789531016817	9.667781748100567e-5	0.001171962625087391	8.512436932383286e-4	5301	tags=50%, list=28%, signal=36%	PSG4/APOB/SELP/JAM2/FN1/SLC7A10/ATP1B2/MAG/PSG8/PSG1/PSG9/SELE/PSG6/KRAS/COL1A1/ANGPT1/ANGPT4/L1CAM/THBD/CAV1/ITGA5/COL1A2/TGFB1/JAM3/PLCG1/PSG7/TEK/CEACAM5/GPC1/CEACAM3/CD177/PF4V1/JAML/GP6/PSG3/INPP5D/ITGAM/SPN/FYN/CD84/SLC7A6/ITGA4/OLR1/SLC7A9/ITGB1/CEACAM6/PIK3CB/PECAM1/SELPLG/ITGAX/PTPN11/CEACAM8/SDC1/PSG5/SDC2/TNFRSF10D/PROS1/ITGB2/GLG1/SRC/CD74/SLC7A7/IGLL1/ESAM/PROCR/CD244/GAS6/SHC1
Ar targets dn	Ar targets dn	18	0.6665866044209914	1.7570643229242715	0.002913602702970524	0.017848847949707657	0.012964337704562507	2049	tags=50%, list=11%, signal=45%	DSPP/MMP8/MEPE/COL1A1/FGF1/CTSK/COL1A2/TGFB1/DMP1
Serotonin and anxietyrelated events	Serotonin and anxietyrelated events	13	0.7332374616190955	1.7560080398644697	0.002009890407582852	0.013413154637133228	0.009742514860863158	3548	tags=77%, list=19%, signal=62%	CRH/HTR2A/HTR1A/GRIN2D/CRHR1/PLCD4/HTR2C/ARC/NLGN1/FOS
Progeriaassociated lipodystrophy	Progeriaassociated lipodystrophy	21	0.6320090706139465	1.7556857545108937	0.005390805676985897	0.02911261095160518	0.02114566278460208	1838	tags=29%, list=10%, signal=26%	FBN1/FFAR3/KCNJ6/PPARG/RECQL/TGFB1
Ascl1 targets up	Ascl1 targets up	46	0.5390936585038948	1.7552524565576675	9.812676427663623e-4	0.007590827170468917	0.0055135237395834025	3242	tags=46%, list=17%, signal=38%	SSTR1/SEMA6A/RAB3B/RHOBTB3/DLL1/BDKRB1/SCG3/SCG2/IGFBP5/BMF/CLDN14/TAMALIN/BDKRB2/SSTR2/RGS16/CCR6/CHGB/IGFBP1/RAB37/RET/SEMA3E
Wnt noncanonical pathway	Wnt noncanonical pathway	32	0.576406179542517	1.7531497209706104	0.0038566173214628643	0.022294617461938324	0.016193479298216483	4961	tags=47%, list=26%, signal=35%	CAMK2A/ROR2/MAPK10/NFATC2/FZD7/FZD2/PPARG/CTHRC1/TAB2/CHD7/WNT5A/FLNA/SETDB1/MAP3K7/DAAM1
Hedgehog signaling pathway	Hedgehog signaling pathway	56	0.5217447862544563	1.7523812237061323	0.0013227128089312395	0.009571090437659755	0.006951868769589823	5023	tags=59%, list=27%, signal=43%	DHH/WNT6/WNT10B/GLI3/BMP6/WNT8A/ZIC2/BMP2/WNT1/LRP2/WNT9B/BMP4/WNT4/BMP5/GLI2/WNT3A/PTCH2/WNT7B/WNT9A/SUFU/GLI1/WNT2B/BMP7/GSK3B/GAS1/WNT5A/WNT5B/PTCH1/RAB23/PRKACB/HHIP/SMO/BTRC
Temporal response to progesterone cluster 0	Temporal response to progesterone cluster 0	70	0.5004828243013839	1.7523163466781433	8.715148161992712e-4	0.006876025012340958	0.004994334120397211	5092	tags=47%, list=27%, signal=34%	ATP1A2/DKK3/GEM/LOX/SASH1/ENPP2/IGFBP3/ANGPTL2/ADRB2/PROM1/NT5E/CFH/EPS8/RECK/ABLIM1/CREBRF/KLHL24/AOX1/ALDOC/PLA2G7/LAMB3/NREP/BBS9/ABCA4/NCAM1/PROS1/RIN2/MXI1/TEF/BACH1/GABARAPL1/SESN1/ABCA1
Methylated in breast cancer	Methylated in breast cancer	35	0.5629960836128347	1.7501471301505453	0.0020522553545807734	0.013604610945545496	0.009881577294747926	3488	tags=46%, list=19%, signal=37%	DKK1/CAVIN1/INHBA/CLC/THBS1/DUSP1/CAV1/IRS2/PTPRG/ETV5/KLF6/FYN/SPHK1/KRT17/F3/MYO1B
Dental caries dn	Dental caries dn	79	0.48908355599725994	1.7495696247333317	5.608384572008715e-4	0.004839932548574355	0.0035154380945941963	5089	tags=53%, list=27%, signal=39%	ATP1A2/OMD/ZNF423/TUBB2B/DSPP/KIT/GHR/SPOCK1/GAP43/SYT1/COL8A2/OLFML1/NEBL/DPP6/NAP1L3/NRXN1/SLIT2/ST8SIA1/CCN1/EGR1/DMP1/TRPC1/TMEM255A/FGFR1/LTBP1/ABLIM1/DIO3/PLK2/OSR2/NBPF10/KIF5C/AHNAK/PER3/PHLPP1/ATP9A/PER2/CD24/PEG10/MAGI2/PTPRK/PLCL1/SESN1
Negative regulation of fgfr2 signaling	Negative regulation of fgfr2 signaling	33	0.5726528426586285	1.748883788722768	0.002596738919595639	0.016295248372419892	0.011835895710189755	2039	tags=27%, list=11%, signal=24%	FGF10/FGF17/FGF7/FGF23/FGF1/FGF2/FGF4/FGF22/FRS2
Keratan sulfate degradation	Keratan sulfate degradation	13	0.7300345273604659	1.7483374302683758	0.002202835951055798	0.014402297994720143	0.010460969551166663	2356	tags=54%, list=13%, signal=47%	OMD/OGN/KERA/ACAN/LUM/FMOD/GNS
Adrenocortical tumor markers dn	Adrenocortical tumor markers dn	19	0.651453847830999	1.7474635074609428	0.004973475240666961	0.02728790675177442	0.01982030657538372	1905	tags=42%, list=10%, signal=38%	ADH1B/PDGFRA/DCN/FOSB/WNT4/IGFBP5/HSD3B2/FBLN1
Hcc progenitor wnt up ctnnb1 dependent	Hcc progenitor wnt up ctnnb1 dependent	82	0.48387689271154305	1.745606754349804	5.591717753072582e-4	0.004835866689535488	0.003512484897290508	2384	tags=38%, list=13%, signal=33%	SERPINE1/DPT/CCDC80/CRISPLD2/CPEB1/PI15/COL5A2/HMCN1/COL3A1/NANOS1/DACT1/ST6GAL2/COL1A1/PRICKLE2/KLHL4/MAGED4B/IGF2BP3/COL1A2/IGFBP5/SPARC/EPYC/CSF1R/CTHRC1/CCN1/LUM/RDH10/CLSTN2/SRPX2/EPHB2/FBLIM1/NKD2
Brain cancer progenitors	Brain cancer progenitors	43	0.5441556048955932	1.744714364121663	0.0014991762419106452	0.010609554942752258	0.007706147397328433	3558	tags=56%, list=19%, signal=45%	GPR17/OPCML/KCNA4/FOXC2/SHISA2/BGN/ARHGAP6/SCG3/PAPSS2/MIA/CAV1/COL6A2/CYTL1/MGP/ERVFRD-1/PID1/SRPX2/TEAD1/KAZALD1/COL6A1/CREBRF/GJA1/PLPPR4/AOX1
Ovarian cancer survival suboptimal debulking	Ovarian cancer survival suboptimal debulking	496	0.40025532276638354	1.7444835787609998	9.151404741018504e-9	3.320284311670939e-7	2.4116563272291167e-7	4177	tags=31%, list=22%, signal=25%	DCHS1/ADRA1A/AVPR2/JAM2/EFEMP1/GSTM5/FOXC2/SPOCK1/CAMK2A/LMOD1/ECM2/PTPRD/PDGFRA/IGF2/ADAMTS7/CILP/ZCCHC24/SNCAIP/ABCA8/ZBTB16/LEFTY2/ARHGAP6/RHOBTB3/ZEB1/CAVIN1/C7/FILIP1L/PEG3/PLPP3/PDGFD/EDNRA/DCN/NID1/IGFBP4/PSD3/KCNK12/COL13A1/ENPP2/PAM/EPB41L3/KL/PITX3/IGFBP3/IRS1/NR2F1/TLE4/PAPSS2/GPRASP1/FRMD4A/RNASE4/GPR68/AGTR1/SYNE1/TFPI/THSD7A/CD302/FAT4/CAV1/SERPINB7/IRAK3/KDR/SNAI2/PDZRN3/IGFBP5/DKK…
Nrp1triggered signaling pathways in pancreatic cancer	Nrp1triggered signaling pathways in pancreatic cancer	53	0.5219045309969224	1.741944995356727	0.0025255412301617456	0.01596513916293658	0.011596124085534397	4266	tags=43%, list=23%, signal=34%	CCN2/TGFB2/COL1A1/PLXNA4/TGFB3/MMP2/MMP9/AKT3/KDR/SNAI2/COL1A2/PLXNA1/CCNE1/TGFB1/EGFR/CDH5/SNAI1/AKT2/HGF/REL/FLT1/TGFBR2/TGFBR3
Angiogenesis	Angiogenesis	24	0.6114874357764198	1.7409788901219527	0.005638459413643452	0.03015936705929572	0.021905963937519677	2210	tags=42%, list=12%, signal=37%	PDGFRA/TIMP3/ANGPT1/MMP9/FGF2/KDR/TIMP2/PLCG1/TEK/CREBBP
Thyroid cancer cluster 1	Thyroid cancer cluster 1	52	0.5275252218090372	1.7402067006219597	0.0011298120054122533	0.008460452691691758	0.006145167807895596	5289	tags=44%, list=28%, signal=32%	LRP4/NKX2-1/FBN1/NR4A1/FOSB/ST3GAL5/SLC35E2B/PLD3/RUBCN/SATB1/ADCY9/FYN/CLASP1/POMK/ITSN2/BTG2/CCND1/EPOR/LASP1/GOLGA8A/SMARCC1/ARHGAP1/GAS6
Id signaling pathway	Id signaling pathway	16	0.6763747276179892	1.7393370394407583	0.003810611444328731	0.022083543488393278	0.01604016776341086	4879	tags=69%, list=26%, signal=51%	MYOD1/PAX2/ID3/ID1/ELK3/CCNE1/RB1/ID2/RBL2/PAX8/ELK4
Hoxa10 targets via progesterone up	Hoxa10 targets via progesterone up	77	0.4873225260302514	1.7388795760316171	5.03453609762114e-4	0.004456688999131291	0.003237072857124825	1668	tags=32%, list=9%, signal=30%	ATP1A2/ADIPOQ/TNXB/CAVIN2/INMT/ELN/NR4A1/CFD/GEM/PEG3/CDKN1C/CSF3R/CLDN5/ENPP2/IGFBP3/TNS2/THBD/ID1/PDPN/RNASE4/LAMA2/BCL2/WNT4/XDH/AQP1
Ascl1 targets dn	Ascl1 targets dn	24	0.6102717140549105	1.7375175829395362	0.005700081310876431	0.03040043365800763	0.02208106032490543	4309	tags=58%, list=23%, signal=45%	DKK1/NRG1/DKK3/CYP1B1/TGFBI/AXL/DUSP1/RASSF2/WNT7B/FGFR1/RSPO3/AHNAK/IGFBP6/CRIM1
Overlap between signal transduction pathways contributing to lmna laminopathies	Overlap between signal transduction pathways contributing to lmna laminopathies	55	0.517304444220612	1.737488078987228	7.872292947514621e-4	0.006377052400250838	0.004631910200002396	4105	tags=36%, list=22%, signal=28%	MYOD1/TCF7L1/HMGA2/WNT10B/TGFB2/BMP2/RUNX2/CTSK/PPARG/TGFB1/NOTCH1/CREBBP/WNT7B/MSTN/RB1/APC/GSK3B/TCF7L2/LEMD3/MAOA
Ngf stimulated transcription	Ngf stimulated transcription	39	0.5562792016083458	1.7367907448473365	0.0017769665910846466	0.01218823533535834	0.008852806598806577	4764	tags=54%, list=25%, signal=40%	EGR3/RRAD/FOSB/ID3/ID1/CDK5R2/EGR1/VGF/ASCL1/CDK5R1/EGR4/MEF2D/F3/SGK1/ARC/EGR2/FOS/TCF12/ID2/NAB2/TPH1
Npc hcp with h3k4me3 and h3k27me3	Npc hcp with h3k4me3 and h3k27me3	239	0.42430891293244966	1.7364757749632653	4.453128787554403e-6	8.690348300560713e-5	6.312150255086086e-5	3063	tags=32%, list=16%, signal=27%	VSTM2B/KCNA1/PODN/NGFR/KIF26B/HOXD13/CRH/ADRB3/GABRA4/PTPN5/FOXC2/CXCL12/LAMA1/AFF3/KANK4/ATOH8/CDH22/SLC35D3/CPEB1/SLC6A15/FGF19/ADRA2B/GPR45/WNT6/AMER3/TSPAN18/GDF6/ADRA2A/ST8SIA2/NEFM/PLXNA4/ADAMTS2/SMOC2/SH3RF3/RSPO2/GREM1/NXPH3/NEFL/KCNK12/CDH11/ACAN/NTNG1/FOXF1/ELFN1/ATOH1/CDK5R2/FGF11/HRK/PTGER4/HCN4/FOXO6/TGFB1/BMF/VGF/EOMES/PTPRU/PCDH8/FLI1/BHLHE22/SLC24A4/DISP3/PRMT8/WNT9A/DLL4/TUB/SATB…
Tnf signaling dn	Tnf signaling dn	83	0.48087877365955467	1.7357965229609447	4.981720105516801e-4	0.0044251417213142345	0.0032141587976610227	4037	tags=40%, list=22%, signal=31%	LYVE1/CAVIN2/EFEMP1/RGS4/ZNF521/CCN2/BGN/SASH1/ANTXR1/IGFBP4/TGM2/THSD7A/KDR/VWF/BMX/GASK1B/ZBTB47/CALCRL/POSTN/NT5E/RHOJ/EMCN/LDB2/EPAS1/TXNIP/MMRN1/DNAJB4/CD34/GIMAP6/CDCA7L/PECAM1/MTUS1/KRT7
Small ligand gpcrs	Small ligand gpcrs	19	0.6469683310027807	1.7354315316033886	0.005911855405211979	0.03101617010962537	0.022528294528383095	4315	tags=63%, list=23%, signal=49%	PTGFR/GPR50/PTGER4/PTGIR/S1PR1/PTGER3/PTGDR/MTNR1B/PTGER2/CNR1/TBXA2R/S1PR3
Glioma stem cell up	Glioma stem cell up	36	0.5574266498845316	1.7350275635277705	0.002222379092450071	0.014455875107627447	0.010499884767819464	4199	tags=47%, list=22%, signal=37%	COL9A3/SLITRK1/EPHA4/NELL2/PROM1/RLBP1/RDH10/FGFR3/ZNF516/SIX1/GIMAP1/SV2C/OBSL1/RTTN/C18orf54/LAMP5/RALGAPA2
Prostate development and cancer box5 up	Prostate development and cancer box5 up	11	0.7480949090274656	1.734957758911031	0.0025332545699136566	0.015994273951219558	0.011617285856608683	2116	tags=55%, list=11%, signal=48%	SFRP1/ASPN/PLPP3/SVIL/EMCN/PID1
Aging hypothalamus dn	Aging hypothalamus dn	35	0.5579832935605828	1.7345642151368257	0.0023433508276069722	0.015053545466123591	0.010933996839667656	2714	tags=29%, list=14%, signal=24%	ATP1B2/SYT1/PTGDS/FSTL1/GRIA1/ACHE/PLD3/DNM1/EPAS1/DLG4
Runx targets dn	Runx targets dn	29	0.5821109860764733	1.7342461371209097	0.0025181999466116225	0.015938287622780194	0.011576620729605998	4450	tags=55%, list=24%, signal=42%	PRRX1/RGS2/SIPA1L2/ID3/XDH/RNF144A/ERRFI1/FNDC3A/VIP/PDE8B/SIX1/KITLG/TENM4/ID2/ENO2/NR3C1
Negative regulation of the pi3k akt network	Negative regulation of the pi3k akt network	111	0.46316202904064613	1.7341643446038377	1.7077522908371632e-4	0.0018666804725177458	0.001355845268020715	3591	tags=32%, list=19%, signal=26%	FGF10/FGF17/FGF7/KIT/FGF23/PDGFRA/FGF19/NRG1/KLB/PDGFRB/FGF1/FGF2/AKT3/KL/IRS1/FGF4/IRS2/FGF22/IL33/EGFR/FRS2/FGFR3/IL1RL1/PIK3CD/NRG2/AKT2/FGFR1/ESR1/FYN/HGF/GAB1/KITLG/CD28/PIP4K2A/PIK3CB/PIP5K1B
Mll af4 fusion targets b up	Mll af4 fusion targets b up	26	0.5996890099969713	1.732443344167362	0.0026345442721482895	0.01641254182600724	0.011921090673311489	1311	tags=35%, list=7%, signal=32%	OMD/PROKR1/CRLF1/COL11A1/ENPP1/ADAM12/IRGM/RUNX3/NRXN1
Adora2b mediated anti inflammatory cytokines production	Adora2b mediated anti inflammatory cytokines production	125	0.4538721191102311	1.7318404876446125	1.9199055433996107e-4	0.002073658985239999	0.001506182104553816	3458	tags=42%, list=18%, signal=35%	MC5R/GLP2R/AVPR2/CRH/ADRB3/PTH1R/HTR6/GNAT3/ADCY1/GPR45/ADCY5/HTR7/DRD1/GPR15/CGA/CRHR2/HRH2/ADCY2/MC3R/GNG2/GPR176/ADCYAP1/ADRB2/IL6/NPSR1/GNB3/PTGER4/CALCRL/ADORA2A/CALCR/GPR20/ADCY7/SCT/VIPR2/GNG4/GNAZ/ADCY6/HTR4/PTGIR/CALCB/GNG11/AVP/CRHR1/ADCY9/GPR150/ADRB1/PTGDR/VIP/PTGER2/GPR83/PTHLH/ADCY4/RAMP2
Upa upar pathway	Upa upar pathway	42	0.5449836696711059	1.730918892015372	0.0017598529481528521	0.01213756678565394	0.008816003988844346	3691	tags=52%, list=20%, signal=42%	CTSG/SERPINE1/LRP1/FN1/KLK4/MMP3/VTN/PDGFRB/PDGFD/MMP9/ITGA5/ELANE/TGFB1/EGFR/FPR1/ITGAM/DOCK1/GPLD1/HGF/ITGB1/PLAU/PLG
Breast cancer 7p22 amplicon	Breast cancer 7p22 amplicon	37	0.5571965273556582	1.7303602704474539	0.0017034338875113108	0.011795821758680476	0.00856778080093762	5575	tags=62%, list=30%, signal=44%	GRIFIN/RADIL/TNRC18/TTYH3/FOXK1/PAPOLB/FBXL18/IQCE/INTS1/MAFK/SLC29A4/GNA12/FAM20C/GPR146/TMEM184A/AP5Z1/LFNG/CHST12/SNX8/SUN1/COX19/MAD1L1/MICALL2
Adipocyte differentiation up	Adipocyte differentiation up	65	0.5036270608867941	1.7296726862058227	0.0017836790988247553	0.012203870806301646	0.008864163271576159	2945	tags=32%, list=16%, signal=27%	ADIPOQ/FABP4/CTSG/PTPRZ1/APOB/DPT/ECM2/VTN/GPD1/FXYD1/AGT/FABP7/LPL/PPARG/APLNR/ALDH1A2/ATP8A2/PTPRS/CAP2/STAT5B/MASP1
Ercc6 targets dn	Ercc6 targets dn	38	0.5544652436048447	1.729588277447472	0.0023924856030245376	0.015311907859357042	0.01112165585976101	3566	tags=53%, list=19%, signal=43%	SCUBE3/SERPINE1/CCDC80/ITGBL1/RGS4/PSG9/AEBP1/RAB3B/COL11A1/PSG6/NGF/GALNT5/KCNK2/RECK/CEMIP/CNTN3/SGCD/KRT34/ZMAT3/SEPTIN11
Senescence tp53 targets up	Senescence tp53 targets up	32	0.5684778645852635	1.7290356089982024	0.004798675280251488	0.026498151172406934	0.01924667526518197	2456	tags=38%, list=13%, signal=33%	GBX2/SIM2/ADAMTS5/NRG1/ABCA8/MMP3/CCND2/C7/HSD17B2/SNCA/APLP1/COX7A1
Gastric cancer early dn	Gastric cancer early dn	360	0.404916440058127	1.7281575566392553	2.381639978100638e-7	6.4241932812431865e-6	4.666150521988299e-6	4713	tags=45%, list=25%, signal=35%	ATP1A2/ADH1B/ANGPTL1/ADIPOQ/ADGRL3/FABP4/PLIN1/SSTR1/PLP1/SFRP1/UNC5D/OMD/PTPRZ1/LYVE1/CAVIN2/GKN2/BPIFA1/JAM2/EFEMP1/DPT/KIT/KCNJ15/SVEP1/GHR/CXCL12/AFF3/DTNA/KANK4/RGS4/SYT4/ASPA/PDK4/CD36/GNAO1/SCN7A/WIF1/ABCA8/SLC26A7/ZBTB16/RBMS3/VSTM2A/SULT1B1/PLN/F13A1/UGT2B11/HLF/TMEFF2/C7/GPX3/MCTP1/SLC16A7/PLPP3/ANGPT1/PDGFD/FUT9/CYP1B1/PRDM16/C16orf89/RGS13/ARHGAP24/ENPP2/RIMS3/DMD/CGNL1/EBF1/ADRB2/AGT…
Il6 signaling scar up	Il6 signaling scar up	30	0.5751619688113258	1.7262788498641224	0.0035401479020586227	0.020820595880600486	0.015122838009875515	2877	tags=47%, list=15%, signal=40%	TNC/MME/IRS1/MOXD1/CIC/NT5E/PPL/AGRN/MAF/DNM1/ADCY9/TMEM158/ZFP36/LTBP1
Integrin a4b1 pathway	Integrin a4b1 pathway	33	0.565239568992782	1.7262436249625175	0.002978176996389687	0.018201148144009093	0.013220227535949725	4773	tags=45%, list=25%, signal=34%	JAM2/FN1/THBS2/MYH2/THBS1/JAML/DOCK1/VCAM1/PXN/TLN1/ITGA4/ITGB1/PRKACB/CD14/SRC
Micrornas in cardiomyocyte hypertrophy	Micrornas in cardiomyocyte hypertrophy	84	0.47737770181983463	1.7256306003839712	9.397922976112648e-4	0.0073360756322624785	0.0053284874290399475	5271	tags=44%, list=28%, signal=32%	PLA2G2A/MAPK4/NRG1/AGT/FGF2/GATA4/PRKG1/FZD1/FZD2/TGFB1/WNT3A/LRP6/PIK3CD/HDAC5/HDAC4/IGF1/AKT2/MYLK/MAPK7/IGF1R/PLCB2/PIK3CB/ROCK2/GSK3B/NPPB/MTOR/WNT5A/RCAN1/NFATC4/MAP2K6/IKBKB/IL6ST/MYLK3/PDPK1/PIK3CG/RAF1/MAP3K14
Serum sensitive via tsc2	Serum sensitive via tsc2	31	0.5690060488435744	1.7254010037651568	0.004533109241538723	0.025552055593443652	0.01855948791163211	2792	tags=35%, list=15%, signal=30%	TUBB2B/THBS2/CCN2/COL3A1/COL1A2/CCDC88A/CCN1/KIF1B/SMG6/NEDD4/FAM234B
Fgfrl1 modulation of fgfr1 signaling	Fgfrl1 modulation of fgfr1 signaling	13	0.7197809770062935	1.7237815151637064	0.0031354093354002874	0.018893133211675184	0.013722844182638378	2229	tags=54%, list=12%, signal=47%	FGF10/FGF17/FGF23/FGF2/FGF4/FGF22/SPRED2
Eicosanoid ligand binding receptors	Eicosanoid ligand binding receptors	15	0.6796248783813778	1.7215205659712436	0.008015271586649353	0.039290846065097494	0.0285385252046056	5024	tags=80%, list=27%, signal=59%	PTGFR/GPR17/OXER1/PTGER4/PTGIR/PTGER3/PTGDR/PTGER2/TBXA2R/CYSLTR2/PTGDR2/CYSLTR1
Wnt signaling pathway	Wnt signaling pathway	179	0.42943764371066856	1.7209903913187947	7.087018133662894e-5	9.060128393208743e-4	6.580736441209766e-4	4621	tags=39%, list=25%, signal=30%	SFRP1/DKK1/SFRP4/CAMK2A/SFRP2/TCF7L1/WIF1/WNT6/WNT10B/SFRP5/CXXC4/CCND2/CDK6/WNT8A/ROR2/NKD1/IGFBP4/MAPK10/WNT1/WNT9B/NFATC2/FZD7/PRICKLE2/FZD1/APC2/FZD2/WNT4/DKK2/PPARG/CTHRC1/WNT3A/TEK/VANGL2/LRP6/TCF4/CREBBP/ROR1/WNT7B/PRICKLE1/CAMK2B/WNT9A/NKD2/DAAM2/FZD10/GJA1/WNT2B/NFAT5/APC/PLCB2/PPARD/PIP5K1B/FZD8/ROCK2/NFATC3/BCL9/GSK3B/TCF7L2/JUN/TSC2/NFATC1/MTOR/WNT5A/CCND1/WNT5B/CCND3/PRKACB/NFATC4/MA…
S1p s1p4 pathway	S1p s1p4 pathway	14	0.6987131843345052	1.7204704144536453	0.0037976941173988032	0.022033468573016482	0.01600379633398856	2563	tags=36%, list=14%, signal=31%	GNAO1/PLCG1/S1PR5/GNAZ/GNA12
Tumor escape from immune attack	Tumor escape from immune attack	19	0.6411601691496921	1.7198516852067607	0.00634976667502973	0.03282970452725287	0.023845537674563575	3950	tags=53%, list=21%, signal=42%	C14orf39/ACKR3/HTRA1/PRL/RGS16/GJB4/VCAM1/PLA2G7/NPPB/CHD7
Inflammatory response live up	Inflammatory response live up	418	0.3994581064754509	1.7182582553427297	1.0962668106387253e-7	3.264720582896366e-6	2.3712981513968174e-6	4455	tags=34%, list=24%, signal=27%	FOXP2/NCAN/ADGRL3/PAX3/SNTG1/COL26A1/BRINP1/SERPINE1/WDR87/LIN28B/NR4A3/GABRA1/C11orf96/CCN5/AFF3/SEMA6C/SEMA6A/LMO3/PLA2G5/KCNE4/PXDN/SLC6A15/HOXA6/DDR2/TSLP/XIRP1/MN1/HSPB7/PGM5/MMP8/COL11A1/DMRTC2/MAB21L1/ARHGAP31/PKP1/WNK4/PLPP3/EDNRA/FRY/NEFL/PSD3/STARD8/SYCE1/BTBD19/DUSP1/IL6/DYNC1I1/EYA4/MYL2/KLHL4/NLRP14/ZEB2/BASP1/MSC/NCOR2/CATSPER2/BTBD9/SYDE1/SVIL/KIF1B/KLHL41/ADAM22/FSCN1/BAMBI/GPC1/C…
Liver cancer subclass ctnnb1 dn	Liver cancer subclass ctnnb1 dn	166	0.4342595157370336	1.7182195566521934	1.2404570115006347e-4	0.001430089501377334	0.0010387316478825644	3461	tags=36%, list=18%, signal=30%	SERPINE1/ASPN/C11orf96/EFEMP1/CCDC80/CXCL12/SEMA6A/THBS2/PRG4/COL5A1/AEBP1/BGN/HAL/PTGDS/CCL21/VCAN/TNFSF4/KCNT2/COL3A1/GEM/C9/SERPINE2/C7/COL1A1/PAPLN/COL6A3/MMP9/BMP2/MCC/CRP/TIMP2/RCAN2/COL1A2/BASP1/IL7R/MOXD1/CTHRC1/GPR183/EGR1/LUM/SRPX/RGS1/HSD17B2/PKDCC/CHST11/MXRA5/ISLR/SULF1/TBX15/MAP3K5/LOXL1/TMEM45A/CMTM3/GLT1D1/SPHK1/F3/DUSP5/CDA/LSR/EGR2
Etv5 targets sertoli	Etv5 targets sertoli	24	0.6034439335602562	1.7180780638061848	0.006750083153889883	0.03436405969253031	0.024960001676803137	5735	tags=71%, list=31%, signal=49%	CXCL12/CD36/ELAVL2/IGFBP4/ANGPTL2/THBD/IL6/KIDINS220/CEMIP/ARSB/FCGR2B/CCL23/FCGR2A/MS4A6A/GPNMB/C1QB/CLEC7A
Atf2 pathway	Atf2 pathway	58	0.5074224009406112	1.7178066169491042	8.861063884644037e-4	0.006969801699799401	0.005062447908382411	4634	tags=45%, list=25%, signal=34%	COL24A1/PDGFRA/SELE/TGFB2/MMP2/DUSP1/IL6/BCL2/HRK/ACHE/NOS2/ARG1/IL23A/ESR1/BRCA1/NF1/RB1/DUSP5/FOS/PLAU/TH/JUN/POU2F1/CCND1/DUSP8/ATF3
Uv response 1hr dn	Uv response 1hr dn	10	0.75787829625314	1.7168730901537568	0.007067595776111184	0.03566332364204194	0.025903709453142187	1823	tags=50%, list=10%, signal=45%	TNR/VTN/ACAN/IL6/EGR1
Melanogenesis	Melanogenesis	101	0.46444007879120786	1.716495434500022	3.6063298312769254e-4	0.003409139686374077	0.002476195567395359	4032	tags=41%, list=21%, signal=32%	KIT/CAMK2A/TCF7L1/ADCY1/GNAO1/WNT6/ADCY5/WNT10B/CALML5/ASIP/KRAS/WNT8A/ADCY2/WNT1/WNT9B/FZD7/FZD1/FZD2/WNT4/CREB3L3/WNT3A/ADCY7/CREB3L1/CREBBP/ADCY6/DCT/WNT7B/CAMK2B/WNT9A/ADCY9/FZD10/MITF/WNT2B/KITLG/ADCY4/PLCB2/FZD8/GSK3B/TCF7L2/TYRP1/WNT5A
Class c 3 metabotropic glutamate pheromone receptors	Class c 3 metabotropic glutamate pheromone receptors	36	0.5509339899860206	1.7148187272856183	0.0026050352100735804	0.01631603901862808	0.011850996794545364	3030	tags=56%, list=16%, signal=47%	TAS1R2/TAS2R13/GPRC6A/TAS2R9/GRM2/GRM3/GRM1/TAS2R38/TAS2R31/TAS2R43/TAS1R3/TAS2R46/TAS2R19/GABBR1/TAS2R40/TAS2R3/TAS2R50/TAS2R30/TAS2R20/TAS1R1
Genes controlling nephrogenesis	Genes controlling nephrogenesis	44	0.5301847204860576	1.7137923442962875	0.0017679265593613111	0.012176948708328176	0.00884460866666122	3385	tags=52%, list=18%, signal=43%	EYA1/FOXD1/FOXC2/CXCL12/CD36/PAX2/NPHS2/GLI3/PDGFRB/LHX1/KDR/SLIT2/WNT4/HOXD11/LMX1B/NOTCH2/ITGA8/KIRREL1/SIX1/LAMB2/RET/TCF21/ITGB1
Adipogenesis up	Adipogenesis up	62	0.49947005640117714	1.712735458543853	0.00137589218693111	0.009914121044851858	0.007201025726227599	1807	tags=23%, list=10%, signal=20%	ADIPOQ/CIDEA/FABP4/CIDEC/ADRB3/GHR/CD36/CFD/AGT/ENPP2/LIPE/PPARG/ITGA7/SPARCL1
Anti inflammatory response favouring leishmania parasite infection	Anti inflammatory response favouring leishmania parasite infection	158	0.4339908661295361	1.7125760151593605	1.069369215766364e-4	0.001272376489521549	9.241783303876077e-4	3458	tags=39%, list=18%, signal=32%	MC5R/GLP2R/AVPR2/CRH/ADRB3/PTH1R/HTR6/GNAT3/ADCY1/GPR45/ADCY5/HTR7/DRD1/GPR15/CGA/CRHR2/HRH2/ADCY2/MC3R/ITPR1/CD163/GNG2/GPR176/ADCYAP1/ADRB2/IL6/NPSR1/GNB3/ITPR3/PTGER4/CALCRL/ADORA2A/CALCR/GPR20/PLCG1/ADCY7/SCT/VIPR2/GNG4/GNAZ/ADCY6/HTR4/PLCG2/PTGIR/CALCB/GNG11/AVP/CRHR1/ADCY9/GPR150/ITPR2/ADRB1/PTGDR/FYN/VIP/PTGER2/PLK2/GPR83/PTHLH/ADCY4/RAMP2
Tnfsf11 targets	Tnfsf11 targets	16	0.6657284556356817	1.711959530443636	0.0054481979075514594	0.02936099960220201	0.021326077473403923	4113	tags=62%, list=22%, signal=49%	DLL1/NOTCH3/CALCR/NOTCH2/NOTCH1/DLL4/NOTCH4/TNFSF11/NFATC1/DLL3
Gr targets dn	Gr targets dn	136	0.44399582652045255	1.7113035952898055	2.658153787493864e-4	0.0027118432303303735	0.001969721045240372	3848	tags=39%, list=21%, signal=31%	LRP4/FCGBP/CXCL12/CACNB4/CRISPLD2/THBS2/FLRT2/CPEB1/SORCS3/ARSI/PHLDB2/SLC38A4/TSLP/ELAVL2/RHOBTB3/TGFB2/GFRA2/CH25H/GNA14/MME/PDZRN4/IGDCC4/PDLIM3/GATA4/IGFBP3/KCTD4/SYNE1/CNTN1/COL1A2/IGFBP5/PTGER4/LRRN3/EGR1/NPTX1/PRKD1/CHSY3/STAG3/TMEM255A/PALLD/LOXL1/RASA3/CNN2/PKIA/DAB1/RSPO3/SYT9/PLA2G4A/SMARCA1/NEXN/FKBP14/NRXN3/JUN/CA8
Hematopoietic stem cell dn	Hematopoietic stem cell dn	227	0.41938012650169315	1.7110247540680625	2.5788986571855848e-5	3.7868700833549733e-4	2.750556380011223e-4	5118	tags=46%, list=27%, signal=34%	CMTM5/OLIG1/KLF2/CRISPLD2/FCGR3B/CD36/ALAS2/MMP8/SULF2/FGFBP2/F13A1/VCAN/EPHA4/HBD/CLEC10A/RTN1/BCL11B/NID1/MMP9/CYP1B1/CD163/RASGRF2/MAN1C1/F5/IGF2R/THBS1/TGFBI/NELL2/ACSL6/IL7R/KLF4/LRRN3/HBB/C5AR1/SLC4A1/S1PR5/RGS1/GZMK/SNCA/PF4V1/STAG3/CST7/HBA1/FPR1/CTSE/CPVL/ARG1/ITGAM/SLC2A3/TXNIP/PTGDR/TUBB2A/CDK5R1/MPEG1/CLEC4A/PIK3R5/SPON2/PLXDC1/IL10RA/S100A12/CITED2/ITK/CX3CR1/STX11/FBLN7/CYBB/SGK1/SA…
Mll af4 fusion targets e up	Mll af4 fusion targets e up	98	0.463803585292795	1.710376881079366	6.558346776762883e-4	0.005527065503408448	0.004014530456157453	3548	tags=40%, list=19%, signal=32%	SFRP1/SORCS2/ASPN/SVEP1/MEDAG/SFRP2/PDE10A/SLC1A6/PDGFRA/SLC38A4/EGR3/MTUS2/ENPP1/L1CAM/CDH11/MAN1C1/TGFBI/COLEC12/RCAN2/BVES/POSTN/CTHRC1/CARNS1/TBX20/FLRT3/BEND5/CYP7B1/PCDHB4/ISLR/SULF1/IL7/NIPAL4/CDH3/CEMIP/CD34/C1S/PDGFRL/MYO1B/FOS
Mll af4 fusion targets a dn	Mll af4 fusion targets a dn	94	0.4682057426487508	1.7101856491854688	5.618738580872979e-4	0.004840759392752104	0.0035160386648483443	4805	tags=43%, list=26%, signal=32%	COL2A1/HOXD13/KLF2/SEMA3D/CSDC2/SLIT3/LRRN4CL/GALNT13/TGFB2/PDE4B/C1QTNF3/C16orf89/AHRR/ENPP2/FBXO2/PCOLCE2/WSCD2/PPM1L/AGMO/PARM1/APLP1/WNT7B/SLC2A3/KCNMB1/ESR1/LY6H/NPTXR/LAMA5/SOD3/EPPK1/CAMK4/MYO1D/B4GALNT4/NAT2/AARS2/LOXL4/ITGB5/ATF3/GIMAP7/MACC1
Cardiac progenitor differentiation	Cardiac progenitor differentiation	52	0.5183979014027867	1.7100973836205626	0.0017790281390119315	0.01218823533535834	0.008852806598806577	2025	tags=44%, list=11%, signal=40%	DKK1/ISL1/LIN28B/KIT/ACTC1/PDGFRA/IGF2/NRG1/IRX4/NODAL/SCN5A/TBX5/ROR2/INHBA/FGF2/GATA4/BMP4/KDR/MYL2/TGFB1/WNT3A/TBX20/NOTCH1
Pi 3k cascade fgfr4	Pi 3k cascade fgfr4	19	0.6374003954659248	1.7097664468885432	0.007104171058590977	0.03574566528314027	0.025963517506040305	2039	tags=42%, list=11%, signal=38%	FGF17/FGF23/FGF19/KLB/FGF1/FGF2/FGF4/FRS2
Hair follicle development cytodifferentiation part 3 of 3	Hair follicle development cytodifferentiation part 3 of 3	83	0.47360896458937773	1.7095551706746472	8.241728017260608e-4	0.006603636507764643	0.004796487370280996	4074	tags=52%, list=22%, signal=41%	SFRP1/DKK1/FOXE1/KLK4/WIF1/ZBTB16/DKK3/GJB6/CCN2/BMP6/TP63/BCL11B/FOSB/RUNX3/GATA3/BMP4/FZD1/IGFBP5/ELANE/HR/PROM1/GLI2/TGFB1/NOTCH2/EGFR/FOXN1/NOTCH1/TCF4/FST/MSX2/IGF1/DSG4/SPINK5/CD34/KITLG/EGR2/FOS/GSDMA/JUN/NFATC1/GAS1/WNT5A/DLX3
Inner ear	Inner ear	41	0.5407218994956622	1.7092905549888817	0.002883771347005401	0.017729343651279025	0.012877536915719382	1759	tags=32%, list=9%, signal=29%	ATP1A2/COL9A3/OTOR/FOXD1/ZP2/LRP1/DDR2/LHFPL6/FBXO2/MIA/USH1C/MGP/APOD
Spinal cord injury	Spinal cord injury	116	0.4529538408055247	1.7091002962550816	2.5552123887005913e-4	0.0026328908453170895	0.0019123747456485482	2676	tags=30%, list=14%, signal=26%	COL2A1/PLA2G2A/NCAN/SLIT1/GFAP/NGFR/PTPRZ1/SELP/SEMA6A/MAG/GAP43/PLA2G5/LEP/XYLT1/NR4A1/SLIT3/CSPG4/VCAN/EPHA4/NOS1/MMP9/VIM/ACAN/IL6/SLIT2/AQP1/EGR1/TGFB1/EGFR/PTGS2/NOS2/CHST11/RHOB/ARG1/ZFP36
Vascular smooth muscle contraction	Vascular smooth muscle contraction	115	0.45321514214789743	1.7087856823047907	2.364764323468634e-4	0.0024813168624257436	0.0018022804523380846	3662	tags=39%, list=20%, signal=32%	PLA2G2A/ADRA1A/MYH11/CACNA1C/ADCY1/PLA2G5/ADCY5/CALML5/ACTA2/IRAG1/EDNRA/ADCY2/ITPR1/ACTG2/PRKG1/PPP1R12B/AGTR1/ITPR3/CALCRL/ADORA2A/KCNMB2/NPR2/AVPR1B/ADCY7/ADCY6/PLA2G2E/PTGIR/GNA12/ADCY9/MYLK/ITPR2/KCNMB1/JMJD7-PLA2G4B/ADRA1D/PLA2G12B/PLA2G1B/ADCY4/RAMP2/CACNA1S/CALD1/PLA2G4A/PLCB2/ADRA1B/ROCK2/CACNA1D
Melanoma	Melanoma	104	0.4584649230327058	1.70812537876086	8.457854180815797e-4	0.00673490954243632	0.004891836266623308	4221	tags=39%, list=22%, signal=31%	FGF10/FGF17/FGF7/KIT/FGF23/PDGFRA/FGF19/CALML5/KRAS/PDGFRB/CDK6/FGF1/PDGFD/FGF2/AKT3/GRM3/FGF4/KDR/FGF11/FGF22/EGFR/SHC2/PIK3CD/IGF1/FGF12/AKT2/FGFR1/IGF1R/PIK3R5/NF1/HGF/RB1/MITF/FOS/PIK3CB/FGF13/POLK/MDM2/GADD45B/PDGFA/CCND1
Aging kidney no blood up	Aging kidney no blood up	214	0.4197320572066613	1.7057451509575365	4.313222924064274e-5	5.92018693756485e-4	4.300070399444884e-4	3224	tags=33%, list=17%, signal=27%	GFRA1/PAPPA2/ABI3BP/TRIL/FN1/COL14A1/FBN1/COL5A1/PXDN/CXCL14/ZCCHC24/AEBP1/NUAK1/DKK3/RBMS3/ADRA2A/TPSAB1/COL3A1/SCN5A/TNC/SERPINE2/CAVIN1/C7/COL1A1/LIX1/COL6A3/INHBA/ANTXR1/TMEM200A/PAM/CDH11/NR2F1/ANTXR2/BHLHE41/ALPK2/AXL/FIBIN/STAB1/TFPI/TIMP2/ITM2C/COL1A2/ZEB2/ITPR3/PROM1/MOXD1/CTHRC1/MRC1/SPARCL1/LUM/TSPAN1/FSCN1/RGS1/FHL1/GABBR1/PRICKLE1/MRAS/ISLR/PCDHA9/PIGR/LOXL1/KIRREL1/ABCC3/RARRES1/COL…
Leukemia with mll fusions	Leukemia with mll fusions	79	0.4764542042182174	1.7043913929532213	0.0011408789706172857	0.008506235103647258	0.0061784214190638296	4154	tags=37%, list=22%, signal=29%	CES1/HOXA4/HOXA10/HOXA9/CSPG4/PCDHGC3/RHOBTB3/HOXA7/C9/CCND2/HOXA5/MICAL1/ZEB2/PROM1/ITGA7/PLD3/DACH1/DAB2/PALLD/LILRA1/ADCY9/MAP3K5/PTPRC/RNASE3/FEZ1/PBX3/LAMP5/BMI1/CCL23
Pou5f1 targets up	Pou5f1 targets up	15	0.672480994427816	1.7034247846981112	0.009506457379615786	0.04456530338469566	0.032369576154910325	1747	tags=47%, list=9%, signal=42%	AOC3/FN1/COL5A1/SLIT3/COL3A1/TGFB3/CCN1
Alpc vs multiple myeloma up	Alpc vs multiple myeloma up	26	0.5896388654807737	1.7034094521253942	0.0037647505076545277	0.021916378096537997	0.015918748801322446	5357	tags=58%, list=29%, signal=41%	CXCL12/CD36/PDGFRB/DCN/IGFBP3/RUNX2/IGFBP5/FGFR1/RB1/JUN/CCND1/APP/HMOX1/BTRC/CDKN1B
Dorso ventral axis formation	Dorso ventral axis formation	24	0.5981367158539875	1.702967771343408	0.007493191761276522	0.03734853107608096	0.027127743538629418	2025	tags=38%, list=11%, signal=33%	PIWIL3/CPEB1/KRAS/PIWIL2/NOTCH3/FMN2/NOTCH2/EGFR/NOTCH1
Targets of runx1 runx1t1 fusion granulocyte dn	Targets of runx1 runx1t1 fusion granulocyte dn	18	0.645888384013797	1.7025056138468602	0.005855980970661086	0.03088025993945334	0.022429577493616508	6033	tags=83%, list=32%, signal=57%	CPA3/MS4A2/FCER1A/HDC/CYP1B1/HBA1/IL10RA/KRT86/ENTPD1/PMP22/PDE4C/ALOX5AP/CAMK1/GDPD5/ADAM8
Nephrogenesis	Nephrogenesis	18	0.6458577659768717	1.7024249073640678	0.005855980970661086	0.03088025993945334	0.022429577493616508	3510	tags=72%, list=19%, signal=59%	FOXD1/PAX2/OSR1/WNT9B/WNT4/ALDH1A2/WNT3A/NOTCH2/SIX2/RSPO3/TCF21/GREB1L/BMP7
Phase 0 rapid depolarisation	Phase 0 rapid depolarisation	32	0.5593691542549311	1.7013313033526616	0.006094588763057832	0.03178068958226109	0.023083595837066474	3062	tags=56%, list=16%, signal=47%	SCN4A/CACNA1C/CAMK2A/SCN7A/SCN10A/CACNA2D2/SCN11A/SCN3A/SCN5A/SCN2A/FGF11/SCN8A/CACNB2/CAMK2B/CACNG4/FGF12/SCN4B/SCN1B
Classic adipogenic targets of pparg	Classic adipogenic targets of pparg	27	0.5807702373840187	1.7011436115303193	0.004462441428814239	0.025236551307630032	0.01833032443172294	601	tags=22%, list=3%, signal=22%	FABP4/CIDEC/LGALS12/CD36/CFD/PLIN4
Shh targets dn	Shh targets dn	63	0.4969153708430599	1.7004568414697883	0.0030066741550857333	0.018310148046101298	0.013299398558329954	4353	tags=46%, list=23%, signal=35%	SFRP1/AOC3/SFRP2/POU3F1/CRLF1/PGM5/VCAN/COL1A1/MME/TGFBI/ECRG4/SPARC/CALCRL/ACHE/CCNE1/BAMBI/MEGF10/TUBA1A/GNA12/ANGPTL4/PTX3/HGF/RET/LRRC17/NREP/CCL23/WNT5B/SDC1/FAM102B
Gpcr ligand binding	Gpcr ligand binding	446	0.3930634858233194	1.6992006728324212	1.9855624912973125e-7	5.559574975632475e-6	4.038143396202486e-6	3053	tags=33%, list=16%, signal=28%	NPY5R/PTGFR/HTR1E/GPR17/SSTR1/ADRA1A/MC5R/DHH/GLP2R/PROKR1/AVPR2/HTR5A/NPBWR2/CRH/FFAR1/NPFFR2/ADRB3/TAS1R2/TAC3/CXCL12/TAS2R13/PTH1R/HTR6/NMBR/NTSR1/ADRA2B/WNT6/PENK/PLPPR5/WNT10B/HTR7/HCRTR1/RHO/ADRA2A/CCL21/MLNR/NPY1R/FFAR3/RGR/DRD1/GPRC6A/ACKR3/HTR2A/WNT8A/ACKR1/CGA/CRHR2/AGT/TAS2R9/CCKAR/EDNRA/HRH2/BDKRB1/MC3R/GRM2/SSTR3/GNG2/GRM3/WNT1/ADCYAP1/GRM1/CCL16/HTR1D/GPR55/WNT9B/FZD7/OPRL1/NTSR2/AD…
Lvad support of failing heart up	Lvad support of failing heart up	102	0.4578010513284857	1.6976757304386894	6.530319653785265e-4	0.005515443746934702	0.004006089105989062	3617	tags=37%, list=19%, signal=30%	FLNC/SERPINE1/MFAP4/KLF2/PDK4/PLA2G5/CSDC2/ZBTB16/LAMB1/CCN2/TIMP3/PER1/NID1/CD163/ANKRD1/AGTR1/SNAI2/POSTN/IRS2/CCN1/CNN1/FSTL3/TIMP4/TSC22D3/CHST3/FHL1/TMEM204/RERE/ZFP36/ZBTB20/TXNIP/FOXO3/DEPP1/PLPP1/KLF9/CALD1/MYOM1/MAPRE2
Response to tsa and decitabine 1a	Response to tsa and decitabine 1a	21	0.6110694948590538	1.6975167873746244	0.010345146963309237	0.04741832487096904	0.034441840657955	2536	tags=43%, list=14%, signal=37%	SFRP1/TIMP3/COL6A3/LAMA2/TIMP2/SEZ6L/PCDH8/PTGS2/ADGRL2
Adipogenesis peak at 0hr	Adipogenesis peak at 0hr	62	0.49502553036242014	1.6974947103839946	0.0016536778079928008	0.011528752458428836	0.008373797603325128	3300	tags=39%, list=18%, signal=32%	ADH1B/KLF2/SFRP2/THBS2/OGN/COL8A1/PDGFRA/TIMP3/COL11A1/ACTA2/PDGFRB/TGFB3/IL11RA/LPL/CTSK/FZD2/MGP/RASL11B/DAB2/IGF1/VEGFD/MARCKS/TLN1/F3
Localized to distal and proximal dendrites	Localized to distal and proximal dendrites	18	0.6438458928774063	1.6971217848262359	0.006299132123244872	0.03268190201304892	0.02373818275097845	3196	tags=44%, list=17%, signal=37%	CAMK2A/ADCY1/HPCAL4/ITPR1/KIF5A/SBK1/DLG4/RGS8
Netrin 1 signaling	Netrin 1 signaling	50	0.5160073138778503	1.6971159530004079	0.002227865845391342	0.014455875107627447	0.010499884767819464	5877	tags=54%, list=31%, signal=37%	SLIT1/UNC5D/TRPC5/TRPC4/SLIT3/UNC5C/SLIT2/ABLIM3/PLCG1/TRPC7/TRPC1/AGAP2/DOCK1/FYN/ABLIM1/NTN1/UNC5B/PTPN11/SRC/ROBO1/RGMA/TRIO/DSCAML1/ABLIM2/HJV/DCC/MAPK11
Nfkb targets	Nfkb targets	24	0.5960472963843383	1.6970189407110166	0.00798859846988846	0.039197389825586036	0.02847064417088068	2025	tags=38%, list=11%, signal=33%	ACTC1/CMA1/HOXA1/MYH1/MIOX/MYH7/CHRNG/APLNR/NOTCH1
Plateletapp pathway	Plateletapp pathway	13	0.7083303372711404	1.6963587272006904	0.0046213263066266635	0.02588803267842254	0.01880352161077806	4588	tags=85%, list=24%, signal=64%	SERPINE1/COL4A3/COL4A4/COL4A6/COL4A5/PLAU/PLG/COL4A2/COL4A1/F11/APP
Glycosaminoglycan biosynthesis chondroitin sulfate	Glycosaminoglycan biosynthesis chondroitin sulfate	22	0.6044951440524882	1.6960753064257426	0.00889603685696718	0.042437390636198995	0.030823987355281027	5151	tags=68%, list=27%, signal=50%	XYLT1/CHST15/CHST3/DSE/CHSY3/CHST11/UST/B3GAT2/CHST13/CHST12/CHPF/CSGALNACT2/CHSY1/CSGALNACT1/B3GAT1
Epithelioid hemangioendothelioma	Epithelioid hemangioendothelioma	93	0.4645013945567366	1.6957735090370345	9.435723598047528e-4	0.0073544399360273615	0.005341826163079698	2514	tags=37%, list=13%, signal=32%	ANKRD33/SERPINE1/KIF26B/SELP/EFEMP1/FOXC2/SEMA3D/COL8A1/HOXA1/TGFB2/BMP6/MSRB3/CUBN/EHD2/FGF2/ANKRD1/LATS2/FOXF1/BMP4/MAFA/STON1/MYL2/KCNN2/MMP19/CCN1/OR6B2/PDE3A/KCNV1/PPP1R13L/FSTL3/SRPX2/FMOD/SLC6A4/TRIM58
Disruption of postsynaptic signaling by cnv	Disruption of postsynaptic signaling by cnv	33	0.5549410472392029	1.6947919034290577	0.004865288955954047	0.02683722559001633	0.01949295868186255	3828	tags=48%, list=20%, signal=39%	GRIN2C/GRIN2B/CAMK2A/RPH3A/GRM1/NLGN3/NRXN1/NLGN2/NRXN2/CAMK2B/SYNGAP1/GRIN2D/DLG2/ARC/NLGN1/NRXN3
Frs mediated fgfr3 signaling	Frs mediated fgfr3 signaling	20	0.6204600733848988	1.6944992979663083	0.008125970998382111	0.03975783721145739	0.02887771969735433	2056	tags=40%, list=11%, signal=36%	FGF17/FGF23/KRAS/FGF1/FGF2/FGF4/FRS2/FGFR3
Hdac2 targets dn	Hdac2 targets dn	118	0.4481248822823193	1.6944269997808434	3.8489729728096014e-4	0.003592374774622295	0.0026092865976998733	4873	tags=45%, list=26%, signal=33%	PDE1C/CAVIN2/DTNA/KRT81/CXCL14/ZCCHC24/TIMP3/COL11A1/COL5A2/COL3A1/NANOS1/ACKR3/DACT1/COL1A1/LOX/NEFL/CDH11/MGAM/OLFML3/ALPK2/CCL26/MYL2/AQP1/SYT11/LUM/SCEL/TMEM200C/TMEM255A/RHOBTB1/ZBTB20/LOXL1/SPX/CAP2/UNKL/JPH3/KRT17/NPTXR/LPAR5/NEXN/GXYLT2/NRXN3/NPPB/WNT5A/IGFBP6/PLCE1/TAGLN/PTCH1/SDC2/FKBP9/CHRNB1/BCAM/JUP/GALNT2
Aging brain up	Aging brain up	262	0.41053798717505086	1.6935946053568267	4.791986745816432e-6	9.21205810240532e-5	6.691089112874085e-5	4955	tags=40%, list=26%, signal=30%	LRP4/PLP1/SFRP1/GFAP/EYA1/ZNF423/NTRK2/EFEMP1/ECM2/ZCCHC24/EFS/RHOBTB3/VCAN/OLIG2/NEBL/FXYD1/ELOVL2/FGF1/AGT/PDLIM3/CLDN5/CYP1B1/FGF2/TGM2/VIM/TLE4/CD302/MLC1/CAV1/BCL2/VWF/HTRA1/ZEB2/HBB/COL4A5/APOD/CEP170/IL33/HEPH/FGFR3/CFH/BAMBI/RASSF2/RYR1/DPYSL3/HBA1/PLXNC1/ASCL1/EFHD1/GNG11/PALLD/ZBTB20/MAP3K5/S1PR1/HSD17B6/TP53BP2/TXNIP/FYN/LPIN1/LTBP1/NKX2-2/HSPA2/AMOTL2/S100B/GNE/TLN1/GJA1/PLPP1/CLIC2/S…
Methylated in lymphoma tcl1	Methylated in lymphoma tcl1	59	0.4989638984649569	1.6912191664886371	0.001140754150014885	0.008506235103647258	0.0061784214190638296	4338	tags=47%, list=23%, signal=37%	SOGA3/HOXD13/HOXA2/MEDAG/TBX18/PTPRD/AJAP1/ISM1/FOXG1/SAMD5/EPHA7/TSHZ3/FOXD3/FAM184A/BHLHE22/CLVS2/MDGA2/ADGRL2/FIGN/ESR1/KLHL29/SPRY2/EGR2/PCDH10/GAS1/EVX2/NCAM1/CLEC16A
Signaling by insulin receptor	Signaling by insulin receptor	76	0.4775916963952429	1.6902124264215763	6.276323337571304e-4	0.0053447302206888194	0.003882092990877075	2056	tags=25%, list=11%, signal=22%	FGF10/FGF17/FGF7/FGF23/FGF19/KLB/TLR9/KRAS/FGF1/FGF2/ATP6V0D2/KL/IRS1/FGF4/IRS2/FGF22/PDE3B/FRS2/FGFR3
Mir30 targets up	Mir30 targets up	116	0.4479161686570782	1.6900919863883759	3.1900404136998454e-4	0.0031364672159125196	0.0022781425614107976	6418	tags=47%, list=34%, signal=31%	ADGRL3/DTNA/GNAO1/CELF2/KRAS/CCND2/CDK6/RRAD/IRS1/GFPT2/DMD/BCL2/IRS2/DPYSL2/ARHGEF6/HIC2/USP34/MAF/NEDD4/SNAI1/RAI14/TAOK1/MAP4K4/RASA1/FNDC3A/MARCKS/RAPH1/NFAT5/MYH10/LRRC17/PIP4K2A/ARID4B/JUN/WDR7/NCAM1/B4GALT5/FNDC3B/SPPL3/ITSN1/PPP1R12A/EPC2/BNC2/NOVA1/ELMO1/SON/MAML1/USP47/CCPG1/TNRC6A/ARID4A/CAST/BECN1/NFIB/SEC23A
Binding and uptake of ligands by scavenger receptors	Binding and uptake of ligands by scavenger receptors	42	0.5320845814101006	1.6899501863398017	0.002913348231073478	0.017848847949707657	0.012964337704562507	1744	tags=36%, list=9%, signal=32%	APOB/LRP1/CD36/STAB2/SSC5D/COL3A1/COL1A1/MARCO/CD163/STAB1/COLEC12/SAA1/COL1A2/SPARC/HBB
Silenced by methylation in bladder cancer	Silenced by methylation in bladder cancer	51	0.5110243062683429	1.6896766578209454	0.004348613686725583	0.024728540523190068	0.017961335722446205	3305	tags=51%, list=18%, signal=42%	MYH11/NR4A3/DPT/SCRG1/PXDN/NR4A1/ZCCHC24/COL5A2/VCAN/PEG3/COL6A3/LAMA2/USH1C/PROM1/KLF4/HBB/CNN1/ETV1/IGF1/PTGER3/PTX3/CX3CR1/FMO5/CLIC2/PTPRC/MITF
Serum response 240 mcf10a	Serum response 240 mcf10a	55	0.502382779619571	1.6873701752023194	0.0014422166582514263	0.010262845612308492	0.00745431843571361	3037	tags=33%, list=16%, signal=28%	DSG3/DKK1/SERPINE1/ALDH1A3/CDKN1C/THBS1/ADRB2/ITGA5/ABLIM3/FBXL18/GLIPR1/FST/ANGPTL4/TGFB1I1/AKAP12/KRT6A/KRT6B/EMP1
Long term depression	Long term depression	70	0.481922554164961	1.6873321690408487	0.001944727005164116	0.013079939334994158	0.009500487155913746	3615	tags=37%, list=19%, signal=30%	PLA2G2A/CRH/PLA2G5/GNAO1/KRAS/NOS1/ITPR1/GRIA1/GRM1/PRKG1/ITPR3/GNAZ/RYR1/PLA2G2E/GNA12/IGF1/CRHR1/ITPR2/IGF1R/JMJD7-PLA2G4B/PLA2G12B/PLA2G1B/GRIA3/PLA2G4A/PLCB2/GRIA2
Multiple myeloma pr dn	Multiple myeloma pr dn	48	0.5171890098819067	1.6869064208654	0.002288929242374867	0.014800774652393506	0.010750399209149011	5491	tags=52%, list=29%, signal=37%	PCDHGC3/FGF2/CNTN1/DUSP26/MAP2/FGD4/SATB1/ANKRD44/RGPD5/ZBTB20/CBX7/GAB1/PHF1/DDHD2/TBC1D10C/ARID5B/PRDM2/UBE2QL1/BAZ2B/TK2/NR3C2/SLC7A7/PLCL1/DPYD/TFEB
Basal cell carcinoma	Basal cell carcinoma	55	0.5022152524562578	1.6868074960055421	0.0014982233455008561	0.010609554942752258	0.007706147397328433	4904	tags=60%, list=26%, signal=44%	TCF7L1/WNT6/WNT10B/GLI3/WNT8A/BMP2/WNT1/WNT9B/FZD7/BMP4/FZD1/APC2/FZD2/WNT4/GLI2/WNT3A/PTCH2/WNT7B/WNT9A/SUFU/FZD10/GLI1/WNT2B/APC/FZD8/GSK3B/TCF7L2/WNT5A/WNT5B/PTCH1/HHIP/AXIN2/SMO
Atg16l1 targets up	Atg16l1 targets up	102	0.45479089852706567	1.6865131012986876	7.378872876730228e-4	0.006053495710336645	0.004396897934424398	1604	tags=26%, list=9%, signal=24%	ADIPOQ/WFIKKN2/FABP4/PLIN1/DHH/CIDEC/INMT/CCDC80/TF/CD36/LEP/CFD/PLIN4/SLC36A2/RBP4/KRAS/HBD/FABP1/CD163/THPO/LPL/SLC5A12/HAO2/C1QTNF1/SAA2/SAA1/FMN2
Liver development up	Liver development up	164	0.4264914868234809	1.686244744276937	2.012328357257071e-4	0.00216244330204078	0.0015706697325014248	3955	tags=38%, list=21%, signal=31%	ZNF423/HMGA2/SEMA3D/HAND2/PXDN/PDGFRA/SLC22A3/COL5A2/TGFB2/ACKR3/SERPINE2/CAPN6/AKT3/CCN4/ID3/NR2F1/PDPN/PCOLCE2/COLEC12/CD248/FZD2/PDZRN3/TRO/IGFBP5/BASP1/GJC1/MFAP2/MAP4K1/CDK14/EMCN/LDB2/HEPH/ARMCX1/FLRT3/GPC1/TSPYL4/ITGA8/TULP4/RECK/PRPH2/NDN/SATB1/RPRM/RHOB/ADGRL2/LPAR4/PTPRS/MGAT5/FGFR1/TBX3/WLS/PLK2/GJA1/RARB/SMARCA1/MYCN/WASF1/JUN/LRP12/SEPTIN6/GAS1/NNAT/FGF13
Gpr40 pathway	Gpr40 pathway	15	0.6655863876020366	1.6859604336679768	0.010624849043576107	0.048356203420940026	0.03512305965214159	5259	tags=67%, list=28%, signal=48%	FFAR1/PKD1/ITPR3/PLCG1/PLCG2/PLCZ1/PLCB2/PLCE1/PLCL1/PLCB1
Cholangioma stem cell like dn	Cholangioma stem cell like dn	272	0.4071724596475576	1.6859194965056257	5.030192210723663e-6	9.527775834429525e-5	6.920407627369436e-5	3359	tags=34%, list=18%, signal=28%	LTBP4/ADRA1A/DKK1/SGCA/PTGIS/ABI3BP/AOC3/EFEMP1/EMILIN1/LRP1/FBN1/ADGRA2/THBS2/HSPG2/COL5A1/KCNE4/AEBP1/DDR2/MMP14/DKK3/UNC5C/CCN2/BGN/SULT1B1/COL5A2/TPSAB1/SV2A/COL3A1/MXRA8/GEM/ACTA2/CCL18/ADAMTS2/FABP1/ROR2/FAP/ATP8B2/PDLIM3/CYP1B1/CNTNAP1/ANGPTL2/PAPSS2/KSR1/IRAK3/PDZRN3/IGF2BP3/COL6A2/ELK3/MSC/MOXD1/CACNA2D1/NCOR2/RASL11B/PHYHIP/MFAP2/TSPAN1/NOVA2/CREB3L1/SNCA/CR1/PTGS2/PLA2R1/CTSE/RAB31/GRI…
Platelet calcium homeostasis	Platelet calcium homeostasis	28	0.5717171936870362	1.6856857019645244	0.007664378770362949	0.03793168052344853	0.027551308487426346	3243	tags=43%, list=17%, signal=36%	SLC8A3/P2RX2/ITPR1/P2RX6/ITPR3/TRPC7/SLC8A2/ITPR2/SLC8A1/ATP2A3/ORAI2/P2RX7
Stat3 targets	Stat3 targets	24	0.5916839386820187	1.684595932149698	0.008855561633829095	0.04228346018302826	0.030712181462623715	1355	tags=25%, list=7%, signal=23%	FN1/MMP3/CCND2/TNC/TP63/THBS1
Sdhb targets 2	Sdhb targets 2	113	0.4467338375743657	1.683868850829521	6.439358543244597e-4	0.005456509081380947	0.003963282482900718	3272	tags=35%, list=17%, signal=29%	IGDCC3/FBN2/TF/FLRT2/PKHD1/VGLL3/PRRX1/PAH/THBS4/NUAK1/TGFB2/TNFSF4/SERPINE2/CGA/FILIP1L/PEG3/SIPA1L2/F5/DUSP1/PCOLCE2/AGTR1/HS3ST3B1/NOTCH3/MOXD1/CCN1/NT5E/SERPINI1/GSDME/FSTL3/P3H2/LEPR/LTBP2/GULP1/ITPR2/KIRREL1/WLS/CREB5/GJA1/FMO5/TNFRSF19
Npp1 pathway	Npp1 pathway	10	0.743204384821371	1.683631283667074	0.009920501690574662	0.04591792186976414	0.03335203748100106	1749	tags=50%, list=9%, signal=45%	COL4A3/COL4A4/ENPP1/COL4A6/COL4A5
Platelet homeostasis	Platelet homeostasis	86	0.4652044418446307	1.683518330009039	0.001174526276321439	0.008706704137565545	0.00632403015876216	4222	tags=38%, list=23%, signal=30%	APOB/SLC8A3/P2RX2/PDE10A/NOS1/IRAG1/ITPR1/GNG2/PRKG1/P2RX6/GNB3/ITPR3/KCNMB2/PDE1B/GNG4/TRPC7/NOS2/SLC8A2/PTGIR/GNG11/PDE5A/ITPR2/KCNMB1/SLC8A1/PDE2A/ATP2A3/ORAI2/P2RX7/PLA2G4A/PECAM1/GNGT1/GNG3/PTPN11
Aml with flt3 itd	Aml with flt3 itd	39	0.5391783944522262	1.6833993480230514	0.003451436032737524	0.020391970688834547	0.014811510256376026	4617	tags=54%, list=25%, signal=41%	PIEZO2/HOXA4/HOXA9/HOXA5/PDE4B/PDGFD/ADCY2/MMP2/ENPP2/MAP1A/COL4A5/MRC1/BAHCC1/PIM1/SOCS2/SELENOP/PBX3/HOXB3/CYSLTR2/APP/GOLGA8A
Prostate development 12hr up	Prostate development 12hr up	110	0.45087198156302444	1.6833678740087379	3.2399072037549365e-4	0.003159218291495532	0.0022946675846409405	3517	tags=39%, list=19%, signal=32%	FGF10/CIDEA/LRP4/FABP4/ASPN/EFEMP1/SFRP2/COL24A1/CXCL14/WIF1/PENK/ALDH1A3/PDGFD/TP63/RGS2/PDLIM3/CYP1B1/SMOC1/FZD7/COL23A1/COLEC12/CALCRL/CYS1/RASL11B/COL4A6/OR2AK2/NT5E/TSPAN1/ERRFI1/SYNPR/PID1/KLF15/MAF/LOXL2/EPHA3/TMEM45A/SETBP1/MKX/STAT5A/KLF9/ARC/NLGN1/PLA2G4A
Hcmv infection 30min up	Hcmv infection 30min up	50	0.5115754072086341	1.682539687687401	0.002572821253191295	0.016184584977340113	0.011755516425801756	3624	tags=44%, list=19%, signal=36%	COL2A1/SIX6/ST8SIA3/ASPA/AJAP1/EGR3/GPX3/THBS1/DUSP1/CBARP/EYA4/COL6A2/PTK7/RHOB/ZFP36/COL6A1/VEGFD/PLXDC1/KITLG/EGR2/FOS/NFATC3
Transcriptional cascade regulating adipogenesis	Transcriptional cascade regulating adipogenesis	13	0.7020875120559165	1.681407975441233	0.006237151739210515	0.03239294935525461	0.023528304788723878	3461	tags=46%, list=18%, signal=38%	KLF2/GATA2/GATA3/PPARG/KLF15/EGR2
Crmps in sema3a signaling	Crmps in sema3a signaling	16	0.65361814233032	1.6808171538420893	0.0067727302488964245	0.03442179756509514	0.025001939020904144	3820	tags=62%, list=20%, signal=50%	DPYSL5/PLXNA4/PLXNA1/DPYSL2/DPYSL3/FYN/CDK5R1/CRMP1/GSK3B/PLXNA3
Phosphodiesterases in neuronal function	Phosphodiesterases in neuronal function	52	0.5091945829123752	1.6797373632028663	0.0026757575843606857	0.01660903984894729	0.012063815107675634	3067	tags=46%, list=16%, signal=39%	PDE1C/GRIN2C/GRIN2B/PDE10A/ADCY1/ADCY5/DRD1/NOS1/PDE4B/ADCY2/GRIA1/PDE7B/ADORA2A/PDE1B/PDE3A/PDE3B/ADCY7/ADCY6/ADCY10/GRIN2D/PDE5A/ADCY9/PDE2A/PDE8B
Egf signaling up	Egf signaling up	56	0.4998669959381261	1.6789004147425344	0.003025035523971753	0.018378517711677443	0.01334905820223384	4634	tags=48%, list=25%, signal=36%	NR4A3/NR4A1/EGR3/CCN2/GEM/NEDD9/FOSB/ID3/ID1/DUSP1/CCN1/EGR1/SPRED2/KDM6B/ZFP36/KLF6/EGR4/SIK1/DUSP5/ARC/FOS/JUN/KBTBD2/EPHA2/TIPARP/NAB2/ATF3
Hcmv infection 12hr dn	Hcmv infection 12hr dn	98	0.45502401797245423	1.6780003116720574	0.0010427155262991558	0.007946849691558063	0.0057721172469534406	4645	tags=43%, list=25%, signal=32%	ZIC1/SERPINE1/FGF7/CXCL12/CMA1/THBS2/FLRT2/ECM2/PDGFRA/IGF2/GLI3/DLC1/TBX5/AKT3/PTPRB/KCNK2/LDB2/GZMK/MYH8/PTP4A1/DAB2/TSPAN5/TUBA1A/MAP3K5/RUNX1/FYN/SSH1/ASXL1/ZNF516/EXOC6B/LRRC17/KIAA1549L/NREP/PMP22/ID2/PLCE1/DENND3/ZMYND8/SDC2/RIN2/OGA/TRAK1
Es icp with h3k27me3	Es icp with h3k27me3	41	0.5306748399206834	1.677530524457587	0.004072096454519145	0.023336419281070785	0.016950181951660398	2811	tags=46%, list=15%, signal=39%	LRRC4B/ZIC4/FXYD7/MYH11/COL24A1/PCDHB6/LEP/TLR9/XIRP1/MC3R/ZEB2/CNN1/ALPI/ADCY6/POU6F1/CALCB/TMEM255A/KCNJ9/PLEKHG4
Hedgehog signaling paracrine up	Hedgehog signaling paracrine up	141	0.4327047511133472	1.676502528237636	3.0209306071526585e-4	0.0030046012525194008	0.0021823629970387525	4110	tags=41%, list=22%, signal=32%	SFRP1/CADM2/NTRK2/FOXD1/SPOCK1/TSPAN11/KCNE4/ALAS2/WIF1/PENK/BRINP3/TSPAN32/ST8SIA2/NEBL/ALDH1A3/RADIL/C14orf39/COL10A1/WNT9B/IL11/SCN2A/IGFBP5/GLI2/RDH10/DMP1/ATP1A4/C1QTNF7/LEPR/TRPC1/SRGAP2/SPATA9/BDKRB2/FRZB/PTPRS/TRAM2/EPHA3/PTGER3/ADD2/MASP1/SHISAL2B/BCHE/RET/TNFRSF19/ZC3H13/DUSP5/PTHLH/RIC3/AGBL4/HSD11B1/BMP7/GRIA2/TDGF1/TECPR1/CTDSP2/ADAMTSL5/ZFP2/GPR174/TNFRSF9
Neoplastic transformation by ccnd1 myc	Neoplastic transformation by ccnd1 myc	22	0.5974555947169866	1.6763239388361408	0.010711528952086748	0.04866472412799905	0.03534715067731216	2570	tags=45%, list=14%, signal=39%	COL5A1/ARHGAP6/ADAM12/IGFBP4/ARHGAP24/IGFBP3/IGFBP5/BMF/CLSTN2/LPAR4
Integration of energy metabolism	Integration of energy metabolism	106	0.4492032969187232	1.675919334485584	8.025266482075332e-4	0.00647044959556371	0.00469974834754597	2758	tags=26%, list=15%, signal=23%	ADIPOQ/KCNC2/CACNA1C/FFAR1/ADCY1/CD36/CACNA2D2/ADCY5/ADRA2A/GNA14/ADCY2/ITPR1/GNG2/ACACB/GNB3/ITPR3/KCNG2/ABCC8/ADCY7/GNG4/CACNB2/KCNB1/ADCY6/GNG11/SLC2A2/ADCY9/ITPR2/CACNB3
Major depressive disorder up	Major depressive disorder up	46	0.5146317458643561	1.6756061250244632	0.002778379925104187	0.017163325388653203	0.012466415036912011	4008	tags=41%, list=21%, signal=33%	ZNF423/COMP/PTH1R/XYLT1/PENK/MN1/CELF2/ANOS1/PLAGL1/ADAM22/LTBP1/DOP1A/REV3L/SAMD4A/CEP250/APC/CALD1/JUN/PCM1
Class 2 transiently induced by egf	Class 2 transiently induced by egf	49	0.5109052106875889	1.6740828401156076	0.005999211787110136	0.031367006451109125	0.022783121104464888	3390	tags=39%, list=18%, signal=32%	JAM2/HOXC13/EGR3/CCN2/FSTL1/INHBA/OSR1/GFPT2/EGR1/SPOCD1/ERRFI1/GLIPR1/IL7/LMNTD1/SPHK1/CITED2/F3/PTHLH/RNF24
Response to tzd dn	Response to tzd dn	13	0.698937452377099	1.673863993564145	0.007079930149193402	0.0356906067794955	0.025923526295584046	1697	tags=38%, list=9%, signal=35%	GHR/CXCL12/CFD/AGT/PPARG
Adipogenic potential dn	Adipogenic potential dn	47	0.5111347987969461	1.6713182317601116	0.005360346179525163	0.028978492672522185	0.021048247272559738	3458	tags=40%, list=18%, signal=33%	FABP4/PAX3/AOC3/SFRP2/DKK3/ENPP1/PLPP3/COL6A3/CAPN6/THBD/TGFBI/SNAI2/SPARCL1/PPL/COL6A1/LY6H/SIX1/GJA1/RAMP2
Wt1 targets up	Wt1 targets up	215	0.4102994113629308	1.671232969940088	6.711045888221882e-5	8.665490831107552e-4	6.294095273085027e-4	5208	tags=39%, list=28%, signal=29%	FLNC/SERPINE1/FOXD1/PDE10A/RGS4/HMGA2/CSDC2/PDGFRA/IGF2/NR4A1/CSPG4/TIMP3/ZEB1/GEM/FGF1/INHBA/GFPT2/IL11/THBS1/SNAI2/ZNF365/ST3GAL5/CCN1/SYDE1/EGR1/CHST3/GLIPR1/SPRED2/SH2B3/TET3/KDM6B/RAI14/ITPKC/RGPD5/AKAP12/TBX3/BAHD1/SPHK1/SPRY2/PTX3/KRT17/KLF9/F3/DUSP5/SGK1/PTHLH/CX3CL1/ARC/MYH10/ARID5B/CALD1/BAZ2A/SH3BP5/NFATC1/CSRNP2/TNFAIP3/LAMB3/TPBG/CHD7/TNS1/EPHA2/PDGFA/ENO2/PLAUR/CDH2/NR3C1/SYNJ2/EVI2…
Integrin4 pathway	Integrin4 pathway	11	0.7200255497408315	1.669860199638349	0.007104728503481296	0.03574566528314027	0.025963517506040305	3878	tags=64%, list=21%, signal=51%	LAMA1/LAMB1/LAMA2/LAMB2/LAMC1/LAMA5/LAMB3
G alpha z signalling events	G alpha z signalling events	48	0.5118977656159625	1.6696480612404987	0.0028935449223124543	0.01776822817610699	0.01290578031343175	2659	tags=35%, list=14%, signal=30%	GNAT3/ADCY1/RGS4/ADRA2B/ADCY5/ADRA2A/ADCY2/GNG2/RGS17/GNB3/ADCY7/GNG4/GNAZ/ADCY6/RGS16/GNG11/ADCY9
Signaling by fgfr	Signaling by fgfr	86	0.4612759036487147	1.6693014277869958	0.0015782754444078533	0.011108299302717568	0.008068405529004771	2229	tags=24%, list=12%, signal=22%	FGF10/FGF17/FGF7/FLRT1/FLRT2/FGF23/FGF19/KLB/FGFBP2/KRAS/ANOS1/FGF1/FGF2/KL/FGF4/FGF22/PLCG1/FRS2/FGFR3/FLRT3/SPRED2
Insulin signaling	Insulin signaling	158	0.4226499152230589	1.6678233670570026	2.4198368979085072e-4	0.002518585797580733	0.0018293503821509294	6479	tags=50%, list=35%, signal=33%	IRS4/MAPK4/ENPP1/RRAD/MAP3K10/EHD2/SLC2A4/MAPK10/IRS1/LIPE/FOXO1/CYTH3/IRS2/EGR1/MAP4K1/RHOJ/RPS6KA2/SHC2/PIK3CD/MAP3K12/MAP4K4/AKT2/MAP3K5/MAPK7/MAP3K4/IGF1R/ARHGAP33/FOXO3/GAB1/SGK1/TBC1D4/FOS/PIK3CB/STXBP4/INPP4A/GSK3B/JUN/TSC2/PFKM/MTOR/PTPN11/PIK3R4/PRKCI/MAP3K7/RAPGEF1/KIF5B/MAP2K6/IKBKB/GRB10/MAP3K3/PDPK1/CBLB/SORBS1/PRKCH/PIK3CG/SGK2/RAF1/REG1A/MAP3K14/SHC1/RPS6KA6/KIF3A/MAP3K9/MYO1C/MAPK…
Semaphorin interactions	Semaphorin interactions	64	0.4855497744601449	1.666907996725215	0.004705971288353304	0.026154438055659354	0.018997022574343946	4078	tags=42%, list=22%, signal=33%	DPYSL5/MYH11/SEMA6A/PLXNB3/PLXNA4/PLXND1/PLXNA1/DPYSL2/DPYSL3/PLXNC1/RHOB/PAK3/MYH14/SEMA7A/FYN/CDK5R1/CRMP1/TLN1/SEMA3E/PTPRC/ITGB1/MYH10/ARHGAP35/ROCK2/GSK3B/PLXNA3/SEMA5A
Response to oxidized phospholipids tan dn	Response to oxidized phospholipids tan dn	11	0.7186440796219234	1.6666563383734472	0.007495803791278671	0.03734853107608096	0.027127743538629418	623	tags=27%, list=3%, signal=26%	FN1/NAV1/NUAK1
G alpha i signalling events	G alpha i signalling events	307	0.39718233156653104	1.666488839489463	1.5217000763745323e-5	2.4575288636103943e-4	1.7850022699687296e-4	3571	tags=33%, list=19%, signal=27%	NPY5R/HTR1E/GPR17/SSTR1/PDE1C/HTR5A/NPBWR2/TAS1R2/CXCL12/CAMK2A/TAS2R13/GNAT3/ADCY1/RGS4/ADRA2B/ADCY5/PENK/RHO/ADRA2A/CCL21/NPY1R/RGR/ACKR3/GNA14/AGT/PDE4B/TAS2R9/BDKRB1/ADCY2/GRM2/SSTR3/ITPR1/GNG2/RGS13/GRM3/CCL16/HTR1D/GPR55/OPRL1/NPBWR1/SAA1/RGS17/OXER1/GNB3/ITPR3/TAS2R38/P2RY12/TAS2R31/APLNR/GPR183/C5AR1/PDE1B/TAS2R43/NBEA/TAS1R3/TAS2R46/S1PR5/ADCY7/TAS2R19/RGS1/GNG4/RGS21/PPY/GABBR1/GNAZ/TAS…
Uv response via ercc3 common dn	Uv response via ercc3 common dn	462	0.3836596941246919	1.6657152725842852	4.3758420743149525e-7	1.0943853576150794e-5	7.94896196943774e-6	7130	tags=52%, list=38%, signal=33%	SERPINE1/FOXD1/CXCL12/THBS2/NRG1/NUAK1/CCN2/COL5A2/TGFB2/EPHA4/DLC1/FILIP1L/HEG1/FGF2/IRS1/TLE4/ID1/DUSP1/IGF2BP3/IL7R/CCN1/CEP170/ZHX3/EGFR/DST/MED13L/FBXL7/ZNF804A/EPS8/CREBBP/C2CD5/STAG1/SRGAP2/PHF21A/NEDD4/TSPAN5/MAP1B/SCHIP1/HIVEP2/ASAP2/JARID2/RUNX1/MGAT5/TRAM2/SPEN/EIF4G3/KAT6A/TP53BP2/KLF6/RASA1/FYN/CAP2/FNDC3A/CEMIP/BRCA1/REV3L/CDC42BPA/SCAF8/SAMD4A/FOXO3/RB1/KLF7/CCDC93/CLASP1/NCOA3/WAS…
Gpcrs other	Gpcrs other	86	0.4598584868307887	1.6641719686081895	0.0016592107240857984	0.011551694122283828	0.00839046105849931	3649	tags=41%, list=19%, signal=33%	ADGRL3/PTGFR/GPR17/OR3A1/OR1G1/NTSR1/ADGRD1/OR1E1/HTR7/OR3A3/HTR2A/ACKR1/EDNRA/GPR176/GRM1/GPR55/ADRB2/ADGRV1/OR10A5/ADORA2A/GPR183/ADGRE2/CXCR1/DRD4/SSTR2/ADGRL2/S1PR1/F2R/P2RY13/ADRA1D/GPR83/CELSR3/OR10A2/ADGRF5/CNR1
Adipogenesis 1	Adipogenesis 1	31	0.5484054316024003	1.6629336086674378	0.008039124002437283	0.03937031070395141	0.02859624357480943	3348	tags=35%, list=18%, signal=29%	FOXC2/CCN2/PER1/ID3/THBD/IL6/IRS2/ERRFI1/RHOB/DNAJB4/SGK1
Lung cancer scc dn	Lung cancer scc dn	13	0.693919259679683	1.6618460768816103	0.00772944756951361	0.03814378723959207	0.027705370144808315	4882	tags=77%, list=26%, signal=57%	ABCA8/PGM5/RASL12/CAV1/VWF/ADAMTSL3/ADARB1/PHACTR2/NR2F2/SSC4D
Erbb2 breast tumors 324 dn	Erbb2 breast tumors 324 dn	152	0.42375341916013565	1.661721670762219	4.5614924374419723e-4	0.004108533048549133	0.0029841931569941508	1843	tags=23%, list=10%, signal=21%	FCGBP/CAVIN2/CES1/CIDEC/ADRB3/DPT/GHR/CCDC80/CXCL12/CD36/COL5A1/LAMB1/MMP3/PENK/ZEB1/COL3A1/ACTA2/FSTL1/COL1A1/GPX3/COL6A3/ANGPTL2/THBD/PAPSS2/TGFBI/VWF/HTRA1/PTPRB/POSTN/KLF4/MRC1/MAN1A1/GJB2/LUM/SRPX
Delta fosb targets 8wk	Delta fosb targets 8wk	49	0.506995931575675	1.661273307267685	0.007164073658427192	0.036009080476309165	0.026154846578391445	3976	tags=39%, list=21%, signal=31%	CAMK2A/GNAO1/KCNH1/KIF5A/ADORA2A/KIF1B/MAP2/RASSF2/KCNB1/ARNT2/NDST1/SYT6/TSPAN5/SYNGR1/CRY2/MYH10/GRIA2/CLCN4/AFF4
Neuron markers	Neuron markers	66	0.4803503339598594	1.6607945677082556	0.004434182744691026	0.025104296154558427	0.01823426218320023	4086	tags=38%, list=22%, signal=30%	GRIN2B/CAMK2A/GAP43/SYT1/LHX9/UNC80/BMERB1/SLC22A17/RTN1/DPP6/NEFL/CLSTN3/GRIA4/EGR1/PHF24/CAMK2B/CYRIA/CHGB/DISP2/ADD2/GRIA3/CX3CL1/GRIA2/MADD/FLYWCH1
Pgr positive meningioma dn	Pgr positive meningioma dn	12	0.7036528233697584	1.66044884194028	0.005276864949787039	0.028579462406242935	0.020758415506332468	2649	tags=58%, list=14%, signal=50%	FSTL1/PDGFRB/HEG1/EDNRA/BCL2/FMNL3/MAP4K4
L1cam interactions	L1cam interactions	121	0.4379146222487318	1.6597188448711095	4.230681002901312e-4	0.0038852885074772835	0.0028220416484312162	3385	tags=34%, list=18%, signal=28%	SCN4A/NCAN/TUBB2B/LAMA1/GAP43/SCN7A/SCN10A/LAMB1/SCN11A/SCN3A/SCN5A/CNTNAP1/L1CAM/SPTA1/SCN2A/ITGA10/TUBB4A/CNTN1/ITGA5/DPYSL2/EGFR/SCN8A/RPS6KA2/ANK1/EPHB2/SPTB/CNTN2/TUBA1A/DNM1/SPTBN1/SCN4B/DLG4/FGFR1/TUBB2A/TUBB8B/SPTBN4/SCN1B/ANK2/KCNQ3/LAMC1/ITGB1
Leishmania infection	Leishmania infection	298	0.396378736659008	1.6595787507337125	1.903564714872207e-5	2.927512062991525e-4	2.1263700114283412e-4	4861	tags=40%, list=26%, signal=30%	CTSG/MC5R/GLP2R/AVPR2/CRH/ADRB3/PTH1R/HTR6/GNAT3/ADCY1/FCGR3B/MYH2/GPR45/ADCY5/HTR7/TGFB2/DRD1/GPR15/CGA/CRHR2/HRH2/TGFB3/ADCY2/MC3R/ITPR1/CD163/GNG2/GPR176/ADCYAP1/FZD7/ADRB2/IL6/NLRP3/NPSR1/GNB3/ITPR3/PTGER4/CALCRL/ADORA2A/NT5E/CALCR/TGFB1/GPR20/PLCG1/ADCY7/SCT/VIPR2/GNG4/CR1/GNAZ/PTGS2/ADCY6/NOS2/HTR4/PLCG2/PTGIR/CALCB/GNG11/MYO9B/ITGAM/AVP/CRHR1/ADCY9/GPR150/DOCK1/ITPR2/ADRB1/TXNIP/PTGDR/FYN/…
Choroid plexus markers	Choroid plexus markers	103	0.4455130675709027	1.6591162751996555	7.1767141199951e-4	0.0059349006655240386	0.004310757573132143	2969	tags=36%, list=16%, signal=30%	COL9A3/ADH1B/OTX2/INMT/COL8A1/C21orf62/COL8A2/EFS/F13A1/MXRA8/FXYD1/PCOLCE/SLC39A12/KL/ACACB/F5/NID2/TGFBI/PCOLCE2/KDR/CPED1/ECRG4/MROH7/MGP/LUM/NOTCH2/CFH/PBXIP1/KLHDC7A/LEPR/SULF1/PGPEP1/TCN2/TXNIP/CDH3/TMPRSS11A/KCNE2
Lt hsc s1pr3 oe up	Lt hsc s1pr3 oe up	29	0.5567396692879526	1.658658991049795	0.005970470551541445	0.03126002467636334	0.02270541592932161	3764	tags=45%, list=20%, signal=36%	CPA3/CD36/ARHGAP6/VCAN/NID1/TGM2/ABCB4/CST7/AKAP12/TMEM121B/TBC1D4/LPAR5/MICAL2
Hair follicle development organogenesis part 2 of 3	Hair follicle development organogenesis part 2 of 3	32	0.5452540204197408	1.6583998709307068	0.00834301670029983	0.04055020947164597	0.029453251608307748	4420	tags=62%, list=24%, signal=48%	PDGFRA/GJB6/CCND2/FGF1/TP63/INHBA/RUNX2/BMP4/FZD1/GLI2/SNAI1/FOXI3/GLI1/ITGB1/LAMA5/WNT5A/PDGFA/CCND1/NCAM1/PTCH1
Shc mediated cascade fgfr3	Shc mediated cascade fgfr3	18	0.6285549494262598	1.6568161875885006	0.009225004438195255	0.043523097862254535	0.03161258027548114	2056	tags=39%, list=11%, signal=35%	FGF17/FGF23/KRAS/FGF1/FGF2/FGF4/FGFR3
Chondroitin sulfate dermatan sulfate metabolism	Chondroitin sulfate dermatan sulfate metabolism	50	0.5036551505234534	1.6564904561924765	0.00355331366167081	0.020874198386462955	0.015161771670455177	5151	tags=58%, list=27%, signal=42%	NCAN/HSPG2/XYLT1/CSPG4/GPC6/BGN/VCAN/GPC2/DCN/CHST15/GPC1/CHST3/DSE/AGRN/CHSY3/HYAL1/CHST11/UST/ARSB/B3GAT2/CHST13/CHST12/SDC1/CHPF/SDC2/CSGALNACT2/CHSY1/CSGALNACT1/B3GAT1
G protein mediated events	G protein mediated events	54	0.49571470507482007	1.656470091119259	0.004622307429216211	0.02588803267842254	0.01880352161077806	3775	tags=39%, list=20%, signal=31%	PDE1C/CAMK2A/GNAT3/ADCY1/ADCY5/GNA14/ADCY2/ITPR1/ITPR3/PDE1B/NBEA/ADCY7/ADCY6/CAMK2B/ADCY9/ITPR2/GNAL/ADCY4/PLA2G4A/PLCB2/CAMK4
Dermatan sulfate biosynthesis	Dermatan sulfate biosynthesis	11	0.713591915296047	1.6549395206398954	0.008929750408907942	0.042488289029107666	0.030860956909626872	2141	tags=55%, list=11%, signal=48%	NCAN/CSPG4/BGN/VCAN/DCN/DSE
Mapk signaling pathway	Mapk signaling pathway	274	0.39870984937507736	1.6542558517017063	2.3674227684774345e-5	3.52513355583692e-4	2.5604465901847524e-4	3985	tags=30%, list=21%, signal=24%	PLA2G2A/FGF10/FLNC/FGF17/NTRK2/CACNA1G/CACNA1C/CACNA1I/FGF7/PTPN5/CACNB4/FGF23/PLA2G5/PDGFRA/FGF19/NR4A1/CACNA2D2/TGFB2/CACNA1H/KRAS/HSPA6/PDGFRB/NGF/FGF1/PLA2G4F/TGFB3/CACNG5/FGF2/AKT3/RASGRF2/MAPK10/MAPT/FGF4/NFATC2/DUSP1/FGF11/LRRK2/CACNA2D1/FGF22/TGFB1/MAP4K1/EGFR/FGFR3/RPS6KA2/CACNB2/PLA2G2E/MOS/MRAS/CACNG4/GNA12/TAOK1/FGF12/MAP3K12/MAP4K4/MAPK8IP3/AKT2/MAP3K5/CACNB3/FGFR1/DUSP16/RASA1/MAPK7…
Downstream signaling of activated fgfr3	Downstream signaling of activated fgfr3	25	0.5750497408058362	1.653612680686649	0.009273816591851643	0.04367340318210207	0.031721753087686516	2056	tags=36%, list=11%, signal=32%	FGF17/FGF23/KRAS/FGF1/FGF2/FGF4/PLCG1/FRS2/FGFR3
Systolic heart failure up	Systolic heart failure up	408	0.3849082866954991	1.653129904124653	1.6989036283715393e-6	3.646979788904237e-5	2.6489484205529926e-5	5693	tags=39%, list=30%, signal=28%	ANGPTL1/OMD/TRDN/ASPN/CAVIN2/MFAP4/GABRA4/SELP/DPT/SFRP4/CXCL12/ITGBL1/NRAP/RGS4/MYOM3/BCAT1/VGLL3/PRRX1/DKK3/RBMS3/TSPAN18/F13A1/VCAN/EPHA4/ZEB1/SERPINE2/FGF1/EPHA7/ARHGAP24/ENPP2/TGM2/IGFBP3/NFATC2/THBS1/GASK1B/CALCRL/CTHRC1/RASL11B/MRC1/MAN1A1/NT5E/IL33/JAM3/DIRAS3/KLHL41/PLSCR4/NOTCH2/DHRS9/SLC9A9/FLI1/SRPX2/ETV1/APBB2/PPFIBP1/LEPR/FMOD/ZNF608/ENG/AKR1C1/DOCK2/LTBP2/LOXL1/EPHA3/P2RY13/VSIG4/T…
Egr2 and sox10 mediated initiation of schwann cell myelination	Egr2 and sox10 mediated initiation of schwann cell myelination	29	0.5546793176662453	1.6525207168606404	0.006395958817877608	0.033018015861428295	0.023982315786894737	4427	tags=52%, list=24%, signal=40%	MAG/POU3F1/LAMB1/PRX/LAMA2/ADGRV1/DRP2/MPZ/TEAD1/SOX10/UTRN/LAMC1/EGR2/PMP22/NAB2
Angiopoietin receptor pathway	Angiopoietin receptor pathway	49	0.5040579920252872	1.651646562259581	0.007746506321955695	0.038191388105948076	0.02773994457270461	3691	tags=35%, list=20%, signal=28%	FN1/ANGPT1/ANGPT4/MMP2/FGF2/AGTR1/FOXO1/ITGA5/BMX/TEK/RASA1/FYN/STAT5B/STAT5A/PXN/ITGB1/PLG
Bmp2wnt4foxo1 pathway in primary endometrial stromal cell differentiation	Bmp2wnt4foxo1 pathway in primary endometrial stromal cell differentiation	13	0.6894680099738386	1.6511859146830676	0.008508870155373938	0.0410982914709914	0.029851345656132407	1557	tags=62%, list=8%, signal=56%	SFRP1/DKK1/LEFTY2/SMAD9/DCN/BMP2/FOXO1/WNT4
Neural crest stem cell dn	Neural crest stem cell dn	119	0.43626352042720296	1.6499204164192065	0.0011363716583219906	0.008497223198367047	0.0061718757090133336	4328	tags=45%, list=23%, signal=34%	COL9A3/ZIC1/FGF17/FBN2/EFEMP1/GDF7/DTNA/FEZF2/NAV3/WIF1/HDC/FOXG1/ACKR3/PLAGL1/AGPAT4/FUT9/CAPN6/FABP7/IGFBP3/DMD/NELL2/CNTNAP2/DOCK3/SLIT2/BCL2/HTRA1/PROM1/COL4A6/COL4A5/NOTCH1/NOS2/ETV5/TMEM255A/PALLD/CHRDL1/SIX3/CREB5/SPRY2/PLK2/F3/HTR2C/CEP290/ZMAT3/BMP7/FOS/LGI1/WASF1/QKI/MTUS1/EPHA2/WNT5B/ZNF236/ZMYM2
Signaling by erythropoietin	Signaling by erythropoietin	25	0.5734566262887556	1.6490315215619813	0.009765137621476468	0.045406127279645096	0.03298030044114464	6758	tags=80%, list=36%, signal=51%	KRAS/IRS2/PLCG1/PIK3CD/PLCG2/STAT5B/PIK3R5/STAT5A/GAB1/PIK3CB/EPOR/RAPGEF1/PIK3CG/SHC1/NRAS/PIK3CA/VAV1/SOS1/EPO/CRKL
Nos targets	Nos targets	178	0.4113251770138445	1.6472034508358122	2.3976074250930748e-4	0.0025055727087382397	0.0018198984512022807	3913	tags=32%, list=21%, signal=26%	ZIC1/SALL1/SFRP1/DKK1/DTNA/TAL1/SFRP2/TCF7L1/THBS2/CCN2/LEFTY2/NEBL/TNC/DPPA4/ZIC2/LRRN1/FGF2/RASGRF2/ANKRD1/ENPP2/LAMA4/OLFML3/KDR/FOXO1/KCNN2/ZEB2/USP44/MSC/CACNA2D1/DPYSL2/CDK14/EOMES/BAMBI/DPYSL3/ROR1/LRFN3/COL12A1/SULF1/ARID1B/NAALAD2/JARID2/FGFR1/KAT6A/IRX2/SMIM3/FZD10/GJA1/PLPP1/RNF24/OBSL1/BMP7/TDGF1/PNISR/GNPTAB/CSRNP2/FEZ1/TLE3
Multiple myeloma by taci up	Multiple myeloma by taci up	357	0.38723924432131474	1.6461958931196494	3.5623014636301727e-6	7.113557031249089e-5	5.166863200002148e-5	4187	tags=32%, list=22%, signal=26%	PI16/PCDH11X/SLC1A7/PMP2/COL11A2/CNMD/TUBB2B/CIDEC/CACNA1I/BPIFA1/GSTM5/BIRC7/KLF2/KCNIP1/HMGA2/SCRG1/FLRT2/CD22/PLA2G5/VGLL3/NEURL1/NR4A1/NRG1/HOXA6/LRRC15/MMP14/SCN10A/NUAK1/CTXND1/HPCAL4/HORMAD2/MRC2/MXRA8/C1QL1/NOS1/HSPA6/PRX/SASH1/LCN10/PIWIL2/GNG2/MAN1C1/MASP2/OR2H2/ACSL6/KIF5A/CFC1/EPHB4/CELA2B/PLXNA1/HRK/CAMK1G/MSC/APAF1/SYDE1/PDE3B/ARHGEF15/AFDN/CYP11B1/CEACAM5/GNG4/SNCA/CR1/GABBR1/KCNB1…
Alveolar rhabdomyosarcoma up	Alveolar rhabdomyosarcoma up	99	0.44689785429240314	1.6457550010388327	0.0011806291833934882	0.00873937004718858	0.006347756725595661	4415	tags=40%, list=24%, signal=31%	SOX11/RAPSN/EYA1/SGCA/TUBB2B/CHRND/MYOD1/SEMA6A/IGF2/CACNA2D2/CELF2/MAB21L1/CDKN1C/DES/ARPP21/VWF/ZNF536/IGSF3/KCNN3/RYR1/PLXNC1/POGZ/NDRG2/PKIA/ALPK3/PDE2A/ATP2A3/SIX1/SIK1/CASQ2/CNR1/MYCN/RASSF4/CHD7/DCX/FOXN3/DMPK/ZNF106/NCAM1/ASXL2
Npas4 targets dn	Npas4 targets dn	68	0.47165983066332706	1.645585803805215	0.0021156474176234814	0.013920581731285027	0.010111079612356627	3544	tags=34%, list=19%, signal=28%	KCNA1/KCNA4/NPTX2/RGS4/SV2B/SORCS3/PXDN/SHISA2/EGR3/ARPP21/EGR1/VGF/NPTX1/ERRFI1/KCNIP2/OPN3/EGR4/HPCA/KLF9/ARC/EGR2/HSD11B1/ITPRIP
Response to tnf dn	Response to tnf dn	78	0.46010372023136137	1.6453357985000798	0.002957310848061938	0.018095089654649767	0.013143192980197763	1706	tags=18%, list=9%, signal=16%	ADIPOQ/CIDEC/AOC3/ADRB3/CFD/PLIN4/GPD1/FXYD1/RGS2/SLC2A4/LAMA4/LPL/PPARG/RASD1
Fgfr1c ligand binding and activation	Fgfr1c ligand binding and activation	11	0.7093366710121878	1.6450708943502967	0.009842264193804021	0.04572348523577846	0.03321081031652347	1295	tags=55%, list=7%, signal=51%	FGF17/FGF23/ANOS1/FGF1/FGF2/FGF4
Lysophospholipid pathway	Lysophospholipid pathway	65	0.4784570879449647	1.6432281360790615	0.004375347497336193	0.024825760249202716	0.01803195032811288	3832	tags=42%, list=20%, signal=33%	ADCY1/GNAO1/ADCY5/GNA14/ADCY2/MMP2/MMP9/GNG2/MAPT/IL6/PLCG1/EGFR/ADCY7/PRKD1/GNAZ/ADCY6/GNA12/LPAR4/ADCY9/PXN/GAB1/ADCY4/FOS/PIK3CB/ADRA1B/GSK3B/JUN
Hippomerlin signaling dysregulation	Hippomerlin signaling dysregulation	118	0.4344466882666063	1.6427077086528328	8.631009865237019e-4	0.006820086322960294	0.004953703595563063	2880	tags=30%, list=15%, signal=25%	NGFR/CDH10/NTRK2/LIN28B/CDH7/KIT/CDH22/PDGFRA/CDH20/CCN2/CDH18/KRAS/PDGFRB/CDH8/ITGA11/CDH11/LATS2/ITGA10/KDR/ITGA5/CSF1R/ITGA7/EGFR/TEK/FGFR3/ITGA8/CDH5/CDH4/TEAD1/LATS1/ITGAM/PAK3/FGFR1/CDH3/IGF1R
Aldosterone regulated sodium reabsorption	Aldosterone regulated sodium reabsorption	41	0.5194900291886433	1.6421739181106902	0.006631195189316467	0.03399394787597854	0.024691174546237284	3563	tags=39%, list=19%, signal=32%	ATP1A2/IRS4/ATP1B2/KRAS/SCNN1G/IRS1/IRS2/SCNN1B/ATP1A4/PIK3CD/IGF1/PIK3R5/KCNJ1/SGK1/HSD11B1/PIK3CB
Carcinogenesis by kras pten dn	Carcinogenesis by kras pten dn	350	0.3863895625744258	1.6419792435230218	4.930867672358062e-6	9.415548723875026e-5	6.838892553403016e-5	4381	tags=34%, list=23%, signal=26%	ADH1B/PAPPA2/ASCL3/ZFHX4/IRS4/CAVIN2/MYT1/DPT/INMT/GPR182/ACTC1/ZMAT4/SV2B/OGN/PTPRD/HOXA3/TTC6/BGN/SLC22A3/DCLK1/GALNT13/ZEB1/SHISA6/MYT1L/GREM1/CFHR3/RGS2/PDLIM3/GPR153/MMP2/NID1/CLDN5/ENPP2/SYN2/TGM2/ANGPTL2/EBF1/HS3ST3B1/CYTH3/TTLL8/CALCRL/KLF4/SPARCL1/CD93/RASSF6/RHOJ/PLCG1/IRGQ/CNN1/TEK/LDB2/CCNJL/GLIS2/CDON/FBXL7/GREM2/HLA-DQB2/MAP2/FHL1/MPDZ/ST18/OTUD3/NDN/ENG/PLVAP/SATB1/ADGRL2/OPRK1/ADG…
Yolk sac tumor	Yolk sac tumor	61	0.48110269707276376	1.6417683235807077	0.0037429283943976534	0.021838694323824136	0.015862323945978016	2182	tags=31%, list=12%, signal=28%	SALL1/OTX2/PRTG/HMGA2/NRG1/SHISA2/CYP26A1/VTN/ROR2/LRRN1/DCN/BMP2/MGP/COL4A6/LUM/EOMES/FLRT3/P3H2/SLC5A9
Ovarian cancer grades 1 2 dn	Ovarian cancer grades 1 2 dn	71	0.4689612331702576	1.641298862549397	0.0022128621074318957	0.014431222249986237	0.01048197840362477	5474	tags=49%, list=29%, signal=35%	FLRT2/CELF2/DOCK11/C9/PDGFD/CAV1/KDR/BASP1/HBB/PLSCR4/ZNF483/ARMCX1/SNCA/DAB2/SULF1/DOCK4/RARRES1/NISCH/WSB1/SH3BP5/MNDA/CTDSP2/GAS1/IGFBP6/TTC28/ANXA8/TCEAL2/ATP2B4/ATP2C1/CLIC5/PROCR/N4BP2L2/IL1R1/SLC26A11/DPYD
Egf response 40 hela	Egf response 40 hela	42	0.5166410033193142	1.6408999439833853	0.0046665532057361915	0.02604775960558273	0.018919537716134076	4211	tags=45%, list=22%, signal=35%	KLF2/NR4A1/EGR3/ID1/DUSP1/IL6/EGR1/PTGS2/SLC2A3/ZFP36/KLF6/DUSP5/SGK1/KCNJ12/MBNL2/JUN/PPP1R15A/BTG2/UBE4B
E2f targets up	E2f targets up	145	0.42075367240478573	1.640892673788555	6.688904829156326e-4	0.005585289737408978	0.0040568210641731195	4154	tags=34%, list=22%, signal=27%	ADIPOQ/CES1/FBLN2/ELN/OGN/ALAS2/CFD/COL5A2/COL3A1/CCND2/ACTA2/COL1A1/CDKN1C/COL6A3/DCN/IGFBP4/ENPP2/SERPINF1/ACADL/LAMA4/SCG2/ANGPTL2/NID2/LPL/COL1A2/IGFBP5/COL6A2/SPARC/POSTN/MRC1/LUM/MFAP2/CTSE/DAB2/TUBA1A/RHOB/TUBB2A/TMEM45A/EMP1/CD34/GJA1/KITLG/ITGB1/PKD2/COL18A1/CDO1/PMP22/COL4A1/COL15A1/CCL23
Multiple myeloma with 14q32 translocations	Multiple myeloma with 14q32 translocations	37	0.5281218141846473	1.6400694554911364	0.00497176235192353	0.02728790675177442	0.01982030657538372	3590	tags=46%, list=19%, signal=37%	NTRK2/CXCL12/PXDN/NUAK1/CCND2/GALNT10/KCNMB2/KLF4/DPYSL2/FGFR3/P3H2/MAF/MAFB/ABLIM1/CX3CR1/CYBB/TLR4
Cell cell communication	Cell cell communication	127	0.4291290793263186	1.639838360054732	4.492381804919742e-4	0.00407478011601171	0.002959677041602981	4424	tags=36%, list=24%, signal=28%	FLNC/CADM2/CDH10/CLDN19/KIRREL3/CDH7/SDK1/NPHS2/CDH18/CDH8/ACTN3/CLDN5/CDH11/CLDN11/CLDN15/CLDN14/AFDN/DST/ARHGEF6/CDH5/FBLIM1/CDH4/CLDN20/SFTPA2/LIMS2/SPTBN1/KIRREL1/CDH3/FYN/CLDN9/CLDN18/PXN/SDK2/ITGB1/PARD6G/SKAP2/PIK3CB/CLDN8/LAMB3/PARVA/CDH24/FYB1/PTPN11/FLNA/ANG/CDH2
Hoxa9 targets dn	Hoxa9 targets dn	31	0.5405161232259645	1.6390108039461522	0.011016530241333252	0.04965631128901917	0.0360673804005523	4281	tags=45%, list=23%, signal=35%	CD36/IGF2/GATA2/TSC22D3/DCT/TPR/CLCN7/DYNC1LI2/OSBPL8/WSB1/SBNO1/JUN/BMI1/ARNTL
Inflammatory response fima up	Inflammatory response fima up	467	0.37744015396273484	1.638675399290547	8.764918585394872e-7	2.0159312746408206e-5	1.4642521414980628e-5	4359	tags=34%, list=23%, signal=27%	POU3F4/FOXP2/NCAN/FGF17/BRINP1/SERPINE1/C11orf96/EFEMP1/SVEP1/CCN5/AFF3/SEMA6C/NRAP/SEMA6A/TRPC5/ADCY1/COL5A1/PXDN/SLC6A15/CHRDL2/DOK6/HOXA6/DDR2/TNN/PNMA2/TSLP/HSPB7/GALNT13/HAL/TGFB2/IL13RA2/TPSAB1/COL3A1/GEM/ARHGAP31/PKP1/WNK4/CCL18/PLPP3/TBX5/HTRA3/OR51B5/NEFL/IGFBP3/NKAIN3/PAPPA/FZD7/SYCE1/IL6/HS3ST3B1/C12orf50/GRIK2/DYNC1I1/VWF/CYTH3/NLRP14/ZEB2/POSTN/MSC/KLF12/IGSF3/BTBD9/FCAR/RHOJ/KIF1B/K…
Fgfr2c ligand binding and activation	Fgfr2c ligand binding and activation	12	0.6942692776582521	1.6383059653788699	0.006571786488841958	0.03382182810204903	0.02456615701675064	1295	tags=42%, list=7%, signal=39%	FGF17/FGF23/FGF1/FGF2/FGF4
Mcv6 icp with h3k27me3	Mcv6 icp with h3k27me3	71	0.4680345657139454	1.6380556557885204	0.0023241996486098202	0.01494915928793732	0.010858176950927015	2953	tags=37%, list=16%, signal=31%	SCN4A/FGF10/NCAN/CUX2/COL11A2/IQCJ/VTN/FFAR3/ASIP/ISLR2/IFNK/PVALB/APC2/OR2B11/CHRNG/PROK1/CLDN14/ALPI/SACS/CD177/ODF1/PIK3CD/GGT7/SOX6/SLC2A10/KCNAB1
T lymphocyte and nk progenitor dn	T lymphocyte and nk progenitor dn	62	0.47766973672038526	1.6379798649975335	0.0032678288326694976	0.019645104020902276	0.014269030891285471	2801	tags=31%, list=15%, signal=26%	CTSG/NPTX2/CFD/HAL/F13A1/VCAN/SCN3A/MME/SERPINF1/ELANE/IL7R/CSF1R/GPR183/MPO/NRXN2/CST7/RAB31/PALLD/ARHGEF10
Elevation of cytosolic ca2 levels	Elevation of cytosolic ca2 levels	16	0.6369598429072297	1.6379793658266861	0.010570432211841695	0.04815107582264227	0.034974067209360346	3243	tags=50%, list=17%, signal=41%	P2RX2/ITPR1/P2RX6/ITPR3/TRPC7/ITPR2/ORAI2/P2RX7
Senescence dn	Senescence dn	12	0.6931546718713175	1.6356757678913187	0.006832046919096536	0.034644395400772986	0.02516362080127247	3007	tags=58%, list=16%, signal=49%	LAMA1/COL3A1/CCN4/ID1/EGR1/LDB2/MARCKS
Tgfbeta receptor signaling	Tgfbeta receptor signaling	54	0.48934280902928895	1.6351778939843156	0.005643173494790581	0.03015936705929572	0.021905963937519677	3985	tags=41%, list=21%, signal=32%	SERPINE1/ZNF423/LEFTY2/SMAD9/INHBA/WNT1/RUNX2/RUNX3/THBS1/BMP4/ZEB2/TGFB1/BAMBI/SKI/CREBBP/ENG/FST/LTBP1/FOS/JUN/TFE3/TGFBR2
Tumor suppression by smad1 and smad5 up	Tumor suppression by smad1 and smad5 up	131	0.4270526841041193	1.6351573428044612	5.085869052974131e-4	0.004479042283918415	0.0032533089488660434	5571	tags=51%, list=30%, signal=36%	ANGPTL1/ZNF423/BMPER/SORCS2/CACNA1C/EMILIN1/HMGA2/NAV1/TMCC3/NUAK1/RBMS3/CELF2/EFS/FSTL1/GNA14/ENOX1/IRAG1/TP63/MMP2/NID1/NEDD9/TGM2/TGFBI/NHSL2/EYA4/TMEM178B/ZHX3/CDK14/TCF4/APBB2/C16orf54/TMEM204/COL12A1/SMTNL2/UNC13D/VEGFD/MCF2L/WIPF1/PKIA/PLXDC1/GLI1/ARHGEF25/BMP7/SEPTIN11/MNDA/GXYLT2/NFATC1/PLTP/FBLN5/LASP1/ETS1/TCIM/HS6ST2/LAPTM5/EMP3/SEPTIN4/RGMA/CAV2/L3MBTL3/RGS5/SMAD5/NFIX/ZFP36L1/SARDH/…
Synaptic signaling pathways associated with autism spectrum disorder	Synaptic signaling pathways associated with autism spectrum disorder	50	0.49711601571316244	1.6349836486203804	0.004304405510668727	0.02453130220239522	0.017818073579910717	3904	tags=44%, list=21%, signal=35%	NTRK2/GRIN2C/CACNA1C/GRIN2B/PRKAG3/KRAS/AKT3/GRM1/SHANK3/CAMK2B/SYNGAP1/PIK3CD/GRIN2D/AKT2/DLG4/NF1/ARC/PIK3CB/CAMK4/GSK3B/TSC2/MTOR
Multiple myeloma dn	Multiple myeloma dn	106	0.4377630203043372	1.6332371438128344	0.0015871721632361349	0.011140478181188783	0.008091778345481802	3888	tags=37%, list=21%, signal=29%	TMEM119/HOXA10/CXCL12/HOXA9/PENK/WNT10B/SULF2/COL11A1/RBP4/CH25H/MME/LIN7A/CCN4/GP5/ACAN/OLFML3/COLEC12/HS3ST3B1/FZD1/LAMA2/PRRT2/IGF2BP3/COL1A2/ELANE/MRC1/DPYSL2/FBLN1/PF4V1/MAF/IGF1/SETBP1/S100A12/VCAM1/TNFRSF19/LRIG3/FOS/PLA2G7/MEOX2/GAS1
Metastasis stroma up	Metastasis stroma up	108	0.4375925204391917	1.632917031008728	7.919047184671865e-4	0.006404855744965377	0.004652104889946043	3850	tags=34%, list=21%, signal=27%	DKK1/FBLN2/SVEP1/THBS2/HSPG2/COL5A1/XYLT1/TIMP3/COL5A2/VCAN/COL3A1/TNC/CLIP2/ANOS1/PSD3/SNAI2/CLDN11/SPARC/RDH10/AGRN/FHL1/EPS8/PTGS2/AKR1C1/PRRC2B/COL12A1/ETV5/JMY/PTPRS/KRT34/PLK2/IGIP/FZD8/CDC42EP3/PTGFRN/SOCS5/CTDSP2
Liver cancer early recurrence	Liver cancer early recurrence	11	0.7040898921257891	1.6329027327595675	0.010754779226074618	0.04877519592670461	0.03542739079753083	4762	tags=73%, list=25%, signal=54%	PDGFRA/CCND2/VIM/SGK1/REL/TNFAIP3/MEF2C/LAPTM5
Stemness dn	Stemness dn	73	0.464117648232502	1.6327403457599763	0.0028638581126863567	0.017627953400908135	0.012803893090108784	4577	tags=40%, list=24%, signal=30%	COL11A2/CMA1/HDC/HBD/PAPSS2/NHSL2/CSF1R/ACVRL1/MLLT11/EFHD1/RFLNB/MPEG1/CLEC4A/PGLYRP1/ABLIM1/PLD4/LY6H/BMP1/KCNAB2/PTPRC/ZDHHC14/HSD11B1/GRIA2/ABR/CCL23/NCAM1/ZAP70/NIN/ITGB2
Ncadherin pathway	Ncadherin pathway	33	0.5341774195315578	1.6313797116299462	0.009541574150784264	0.04468635623022828	0.03245750171593281	7596	tags=76%, list=40%, signal=45%	GAP43/MYL2/PLCG1/FER/FGFR1/GJA1/DAGLA/DCTN1/GRIA2/CNR1/PTPN11/CDH2/KIF5B/JUP/PIP5K1C/DAGLB/CTNNB1/PIK3CA/PTPN1/MAPRE1/CTNNA1/GSN/AXIN1/MAPK8/ROCK1
Ecm affiliated	Ecm affiliated	168	0.4123167564338078	1.631190257081216	3.087900833605577e-4	0.003059397133603064	0.0022221634541432847	3486	tags=39%, list=19%, signal=32%	OPRPN/MUC7/REG1B/LGALS13/CLEC3A/MUC2/LGALS12/SEMA6C/SEMA6A/SEMA3D/CLEC9A/CSPG4/CLEC18B/GPC6/ELFN2/GRIFIN/CD209/MUC17/SEMA3G/CLEC17A/PLXNB3/C1QL1/PLXNA4/GPC2/CLEC10A/LGALS7/PLXND1/GREM1/SEMA6B/C1QTNF3/C1QTNF5/CLC/C1QL2/ITLN2/ELFN1/FREM3/C1QTNF1/COLEC12/PLXNA1/MBL2/C1QTNF4/CLEC4F/EMCN/CLEC18A/GPC1/PARM1/C1QTNF7/SFTA3/CLEC1A/PLXNC1/MUC3A/SFTPA2/SEMA7A/ANXA6/C1QTNF6/FREM2/CLEC4A/PLXDC1/PLXDC2/C1QTNF2…
Cmv 8 hr dn	Cmv 8 hr dn	49	0.49750903445053973	1.630187596355172	0.00926083473961618	0.04365216887328688	0.0317063297532966	5441	tags=53%, list=29%, signal=38%	ADH1B/FGF7/ZNF521/MN1/ADRA2A/BMP4/FBLN1/ENG/AKR1C1/RUNX1/IGF1R/MARCKS/TP53BP1/TCF7L2/GAS1/ID2/TGFBR3/NR3C1/MYH9/NR2F2/IL6ST/ADM/ITSN1/ACVR2A/DDIT4/ZFP36L1
Wt1 targets 8hr up	Wt1 targets 8hr up	167	0.41218911179197665	1.6300346621024415	5.533700626066687e-4	0.004802093644399669	0.00348795417330844	5691	tags=41%, list=30%, signal=29%	ATP1A2/SERPINE1/PDE10A/RGS4/CSDC2/CSPG4/TIMP3/GEM/HSPA6/FGF1/PEG3/PLXND1/GFPT2/IL11/SYNE1/SNAI2/NBL1/CREB3L1/CHST3/SPRED2/DAB2/PIK3CD/RGPD5/TGFB1I1/PIM1/SPEN/FGFR1/GOLIM4/DNAJB4/EMP1/SPHK1/B4GALT6/PTHLH/CX3CL1/ADAM19/SERTAD2/AFF1/ARC/MARK4/SUPT6H/WSB1/SH3BP5/JUN/QKI/LAMB3/TPBG/POM121/HIPK1/TNS1/ENO2/PLAUR/SYNJ2/ATP9A/DPEP3/SLC7A1/RIPOR1/IL6ST/GRB10/BMPR2/SOX9/ADM/ZMIZ1/RYBP/CSF1/SWAP70/PPP3CA/SLC…
Delayed response to tgfb1	Delayed response to tgfb1	37	0.5246747022991757	1.629364533328906	0.005448093420578319	0.02936099960220201	0.021326077473403923	1573	tags=30%, list=8%, signal=27%	MMP17/COL16A1/THBS2/COL8A1/LAMB1/TNC/MMP2/IGFBP4/THBS1/EPHB4/ITGA5
Ips icp with h3k4me3 and h327me3	Ips icp with h3k4me3 and h327me3	124	0.4273851053109804	1.6275571741582138	0.0013071330043105214	0.00949837692271905	0.006899054012803658	4029	tags=43%, list=21%, signal=34%	FGF10/CNMD/DKK1/OPCML/PROKR1/COL4A3/ADAMTS16/COL4A4/COL24A1/CRYGN/MRGPRE/FXYD5/BRINP3/RFLNA/WNT8A/TGFB3/MIOX/GRM3/PCDHGA1/LAMA4/ISLR2/FIBIN/PDZD7/OR2B11/ADAM33/TRIM46/LOXL3/PHYHIP/RHOJ/YPEL4/CNN1/CHST3/SNCA/ISLR/MEGF10/ERICH6/CACNB3/OSBPL5/ABCC3/SLC2A10/TNFRSF13C/KCNAB1/RGS8/CLEC14A/GNAT1/TMEM26/EXTL1/ROBO2/KCNK10/SLFN5/HOXB13/KCNJ5/PAMR1
Targets of bmi1 and pcgf2	Targets of bmi1 and pcgf2	57	0.4818100500107354	1.6256601994168984	0.004382027417179454	0.02483630940958036	0.018039612608503227	4298	tags=51%, list=23%, signal=39%	CCDC80/CRISPLD2/COL5A1/NAV1/TIMP3/RFLNA/KRT75/CDK6/INHBA/PAPPA/AXL/CAV1/FAM43A/ABLIM3/IL7R/BMP5/TEK/KCNN3/MAP1B/BMP1/ITGA4/PTHLH/ADAM19/MICAL2/RREB1/JUN/CCND1/PLAUR/LFNG
Hcmv infection 48hr dn	Hcmv infection 48hr dn	469	0.37431429456959836	1.625495171347138	2.2521787858208455e-6	4.683840497538021e-5	3.402062146278945e-5	4976	tags=41%, list=27%, signal=31%	EPB42/SIGLEC6/CD1E/PLP1/GFAP/PSG4/NTRK2/MYH11/CACNA1C/GABRA1/EFEMP1/COL16A1/SVEP1/CXCL12/FN1/DTNA/ABCA6/THBS2/LMOD1/ECM2/HSPG2/MMP16/PTPRD/PAX2/XYLT1/PAH/DDR2/RAB3B/LAMB1/SNED1/MMP3/OR1E1/CELF2/ARHGAP6/COL11A1/PAX4/CUBN/ENPP1/JCAD/CAVIN1/NGF/ADAMTS2/CRHR2/SLC16A7/LOX/FAP/INHBA/IGFBP4/AKT3/NAP1L3/ENPP2/IGFBP3/ACACB/IGF2R/TGFBI/PVALB/RNASE4/DUSP1/OR2H2/SLCO2A1/SERPINB7/LAMA2/FZD2/RCAN2/WSCD1/C1orf2…
Vegfa targets 6hr	Vegfa targets 6hr	49	0.49577815478702136	1.6245160238552527	0.009493808680221065	0.04454654127549993	0.03235594847875169	1721	tags=35%, list=9%, signal=32%	ISL1/ELN/BGN/ART4/VCAN/GEM/ROR2/COL6A3/FAP/MMP2/ANKRD1/NID2/PVALB/BMP4/COL1A2/POSTN/MGP
Glioblastoma classical	Glioblastoma classical	161	0.41198405302681895	1.6244125439928916	4.525049089073594e-4	0.004090009281913536	0.0029707385986438833	5039	tags=42%, list=27%, signal=31%	ZFHX4/SEMA6A/PLA2G5/DENND2A/MAB21L1/CLIP2/ELOVL2/CDK6/LHFPL6/DLC1/TGFB3/MEGF8/GARRE1/MCC/FZD7/HS3ST3B1/MLC1/EPHB4/WSCD1/KLHL4/SHOX2/GRIK1/IRS2/ITGA7/GLI2/EGFR/GRIK5/ARAP3/FGFR3/NOS2/CDH4/CAMK2B/LRFN3/AKT2/SLC2A10/CREB5/SPRY2/FBXO17/LAMB2/SOCS2/GJA1/TLE2/DOCK6/ADAM19/SEPTIN11/MEOX2/GAS1/PMP22/RGS12/PDGFA/POFUT1/TRIB2/ARNTL/LFNG/PTPN14/CDH2/EXTL3/GLG1/RFX2/SLC12A4/DMWD/ABCD2/SMO/TBX2/ITGB8/GNG7/RGS6
Stat5a targets dn	Stat5a targets dn	188	0.40358556680306346	1.6241976239913198	3.5933771113339636e-4	0.0034031394995574595	0.00247183738985918	4687	tags=40%, list=25%, signal=31%	CTSG/CAVIN2/SELP/EMILIN1/LGALS12/FCER1A/GCSAML/TSPAN32/ADRA2A/MSRB3/SH3PXD2A/ANGPT1/CLDN5/NAP1L3/SERPINF1/ACOT11/VASH1/VWF/SALL2/PADI4/IRS2/ADORA2A/LOXL3/CD93/JAM3/SLC9A9/NOTCH1/ARAP3/BAMBI/PF4V1/ACRBP/FAR2/TMEM44/GP6/PLCG2/IL7/PTGIR/GNG11/ASAP2/MYLK/SPX/MCEMP1/SLC22A23/CD84/PLXDC2/TLN1/WASF3/STX11/LILRA2/PPM1F/SAMD14/PLCB2/GAPT/ROCK2/TRIM8/PECAM1/GFOD1/CTIF/CLCN4/PBX1/MTMR11/ALOX12/TNNC2/LY6G6D/…
Lgi adam interactions	Lgi adam interactions	14	0.6595659758161816	1.624076621443466	0.010913084424468809	0.04927625850557695	0.03579133274504047	5826	tags=79%, list=31%, signal=54%	LGI4/LGI2/LGI3/ADAM22/CACNG4/DLG4/LGI1/ADAM11/STX1A/CACNG8/ADAM23
Soft tissue tumors pca2 up	Soft tissue tumors pca2 up	89	0.4470457730079344	1.62242805989648	0.003676296297532265	0.021523043778279804	0.015633054231731103	1572	tags=26%, list=8%, signal=24%	COL2A1/COL9A3/FBN2/SSX3/PRPH/FOXD1/NPTX2/SHISAL1/HMGA2/CRLF1/WIF1/COL11A1/SV2A/TNC/GLT8D2/ROR2/GREM1/INHBA/PSD3/CCN4/CDH11/FZD1/SHOX2
Estradiol response 6hr dn	Estradiol response 6hr dn	91	0.446006600151373	1.6222133223612623	0.0030862854934699826	0.018662608993377173	0.013555405151082021	5397	tags=48%, list=29%, signal=35%	EFEMP1/CRISPLD2/MMP16/NUAK1/LRATD1/TGFB2/CDK6/CTNND2/MME/TGFB3/GALNT10/TFPI/STON1/N4BP3/PTGER4/NBEA/KIAA0513/BMF/PLA2R1/EFHD1/EPAS1/UTRN/CREBRF/SH3BP4/KLHL24/ARID5B/MYO1B/LIMA1/ABCC5/FGF13/INPP5J/LIPH/S1PR3/RCAN1/NR3C1/NPNT/DRAM1/CDYL2/TMTC2/PLIN2/AHNAK2/IL1R1/UACA/SALL4
Adipogenesis late up	Adipogenesis late up	96	0.44173140850753756	1.6221233430161053	0.0020429502285070193	0.013565961416088604	0.009853504583645594	5668	tags=48%, list=30%, signal=34%	FABP4/TMEM119/PDE10A/CD36/XYLT1/IGF2/COL11A1/TGFB2/GLT8D2/COL6A3/NID1/LIPE/ACACB/IGF2R/FOXO1/PPARG/IRS2/ELK3/CYBRD1/MGP/TGFB1/P3H2/RAB31/SMIM3/LPIN1/TPR/STAT5B/NPTXR/ABL1/GCC2/TGFBR3/S1PR3/PHKG1/CCDC50/ATF3/PRKAR2B/PLIN2/ABCA1/IL22RA1/ACVR2A/GAS6/PUS7L/MYADM/NOVA1/SERPINB9/PLK3
Signaling by ntrks	Signaling by ntrks	134	0.42214782159810854	1.620471552292383	0.0010291927937462117	0.007878753749450941	0.005722656419438152	6658	tags=51%, list=35%, signal=33%	NTRK2/GRIN2B/EGR3/KRAS/RRAD/NGF/FOSB/ADCYAP1/ID3/IRS1/ID1/CDK5R2/DOCK3/IRS2/ADORA2A/EGR1/VGF/PTPRO/PLCG1/FRS2/RPS6KA2/SHC2/ASCL1/KIDINS220/DNM1/PTPRS/MAPK7/FYN/CDK5R1/EGR4/MEF2D/GAB1/F3/SGK1/ARC/EGR2/FOS/PIK3CB/TCF12/MEF2C/ID2/PTPN11/NAB2/RAPGEF1/AP2B1/TPH1/SRC/AP2A2/SHC1/DUSP4/FRS3/MAPK11/EP300/NRAS/PIK3CA/SHC3/RIT1/AP2A1/DUSP7/LYL1/SRF/MEF2A/MAPKAPK2/SH3GL2/RPS6KA1/MAPK14/DUSP6/SOS1/PPP2R5D
Calorie restriction muscle up	Calorie restriction muscle up	128	0.42328518751452826	1.6192423241863965	8.122799046784468e-4	0.0065388532326614976	0.004749432666335327	2497	tags=26%, list=13%, signal=23%	ATP1A2/ADIPOQ/CPA3/NR4A3/LRP1/ACTC1/FN1/PDK4/HSPG2/PSG1/GPD1/COL3A1/HSPA6/COL1A1/DES/COL6A3/FAP/IGFBP4/MYH7/SLC2A4/KL/MAPT/THBD/CD302/LAMA2/COL1A2/ELANE/PPARG/LUM/RASSF2/NDN/ENG/TUBA1A
Glucocorticoid receptor pathway	Glucocorticoid receptor pathway	70	0.46243439813142984	1.6190992293154154	0.004962042813393679	0.02728329196862778	0.01981695467237491	4450	tags=44%, list=24%, signal=34%	PMP2/CAVIN2/NAV3/ACKR3/ZIC2/CDKN1C/PDE4B/RGS2/GPR153/ANKRD1/MGAM/THBD/IL11/SNAI2/TNS4/TSC22D3/FGD4/PTGS2/ANGPTL4/AKAP13/PLK2/ETNK2/SERTAD2/ABHD2/CDC42EP3/RXRA/JUN/TNFAIP3/GADD45B/TGFBR3/NR3C1
Brainderived neurotrophic factor bdnf signaling pathway	Brainderived neurotrophic factor bdnf signaling pathway	144	0.41632835208422747	1.6185797500055497	7.237956519769358e-4	0.005956861340231907	0.0043267084963477505	3928	tags=32%, list=21%, signal=25%	IGF2BP1/NGFR/NTRK2/GRIN2B/CAMK2A/NGF/GRIA1/BMP2/MAPK10/MAPT/IRS1/ACACB/KSR1/DOCK3/KCNN2/IRS2/DPYSL2/EGR1/PLCG1/FRS2/SHC2/KIDINS220/CRTC1/GRIP1/MAPK7/FYN/CDK5R1/STAT5B/MARCKS/STAT5A/FOXO3/GRIA3/APC/EGR2/SHC4/FOS/GRIA2/CNR1/CAMK4/KCNA3/VAV2/GSK3B/JUN/TSC2/MTOR/MEF2C
Melo covid19 sars cov 2 low moi infection a594 ace2 expressing cells up	Melo covid19 sars cov 2 low moi infection a594 ace2 expressing cells up	141	0.41772942141846614	1.6184810296752508	8.486639072573945e-4	0.006747401929305704	0.004900909990740802	4512	tags=38%, list=24%, signal=29%	COL2A1/NGFR/NR4A3/C11orf96/FOXC2/TCERG1L/GPR142/PRG4/NR4A1/EGR3/SELE/PER1/FOSB/CD300LB/ARHGAP40/ACAN/BHLHE41/ID1/SAA2/RASD1/ACHE/EGR1/VGF/FRS2/FOXD3/PTGS2/FST/KDM6B/IL23A/ZFP36/CEMIP/IGFBP1/PTX3/CSRNP1/ARHGAP30/CREBRF/SERTAD2/ARC/REL/EGR2/FOS/LSMEM1/CD200R1/PPP1R15A/TNFAIP3/ZNF596/SLCO5A1/ARRDC3/PER3/NFKBID/DUSP8/ZNF292/NFKBIZ
Negative regulation of fgfr4 signaling	Negative regulation of fgfr4 signaling	30	0.5390567120353599	1.6179133032510968	0.009912653180819055	0.04591792186976414	0.03335203748100106	2039	tags=27%, list=11%, signal=24%	FGF17/FGF23/FGF19/KLB/FGF1/FGF2/FGF4/FRS2
Soft tissue tumors pca1 up	Soft tissue tumors pca1 up	75	0.45929032887979027	1.6178871395546264	0.0033795468013051192	0.020128815168004594	0.01462036979451135	4923	tags=48%, list=26%, signal=36%	SERPINE1/EFEMP1/CCN5/ITGBL1/THBS2/F13A1/HSPA6/MME/FAP/DCN/CD163/THBS1/CSF1R/MRC1/LUM/CFH/GZMK/GABBR1/SRPX2/DOCK2/ITGAM/VSIG4/SLA/SIGLEC1/C1S/MS4A4A/ECM1/FCGR2B/NCKAP1L/SLAMF8/BIN2/PLTP/FCGR2A/CD14/HLA-DQA1/LILRB1
Nuclear events kinase and transcription factor activation	Nuclear events kinase and transcription factor activation	61	0.4737669268727395	1.6167349258950454	0.004924886182857723	0.02710792052786644	0.019689575326202437	6658	tags=59%, list=35%, signal=38%	EGR3/RRAD/FOSB/ID3/ID1/CDK5R2/EGR1/VGF/RPS6KA2/ASCL1/MAPK7/CDK5R1/EGR4/MEF2D/F3/SGK1/ARC/EGR2/FOS/TCF12/MEF2C/ID2/NAB2/TPH1/DUSP4/MAPK11/EP300/DUSP7/LYL1/SRF/MEF2A/MAPKAPK2/RPS6KA1/MAPK14/DUSP6/PPP2R5D
Hif1a and hif2a targets dn	Hif1a and hif2a targets dn	105	0.4319611421996219	1.6146357131274645	0.00199171828018947	0.013343735474039206	0.009692092924609631	6550	tags=59%, list=35%, signal=39%	SERPINE1/CCN5/SPOCK1/CAVIN1/LOX/ITPR1/PAM/IGFBP3/RNASE4/CAV1/MAGED4B/IGFBP5/SCNN1B/DPYSL2/EGR1/SRPX/EGFR/DST/UPK1A/ANGPTL4/LOXL2/AKAP12/LOXL1/FYN/TMEM45A/CITED2/SAMD4A/GJA1/WSB1/OBSL1/FOS/ALDOC/YEATS2/SFXN3/ENO2/PLAUR/ANG/ZNF292/PPFIA4/DPYSL4/MXI1/PLIN2/SOX9/ADM/VEGFA/AHNAK2/RASA4/VEGFC/LIMCH1/DSC2/P4HA2/KDM4B/BNIP3L/KRT15/SLC2A1/ATXN1/FAM13A/PGAP1/SH2B2/ZNF395/RRAGD/QSOX1
Regulation of insulin secretion	Regulation of insulin secretion	76	0.4559729046481405	1.6137028247451417	0.002064335292700231	0.01361774062482918	0.009891113910033455	5327	tags=47%, list=28%, signal=34%	KCNC2/CACNA1C/FFAR1/CD36/CACNA2D2/ADCY5/ADRA2A/GNA14/ITPR1/GNG2/GNB3/ITPR3/KCNG2/ABCC8/GNG4/CACNB2/KCNB1/ADCY6/GNG11/SLC2A2/ITPR2/CACNB3/MARCKS/PLCB2/CACNA1D/GNGT1/GNG3/PRKACB/STX1A/PRKAR2B/RAPGEF4/GNG7/SYT5/PLCB1/GNA15/GNGT2
Wnt ligand biogenesis and trafficking	Wnt ligand biogenesis and trafficking	26	0.5584714158990424	1.6133697153911575	0.008181847173106925	0.039955333304120266	0.02902116906998765	4262	tags=50%, list=23%, signal=39%	WNT6/WNT10B/WNT8A/WNT1/WNT9B/WNT4/WNT3A/WNT7B/WNT9A/WLS/WNT2B/WNT5A/WNT5B
Agr pathway	Agr pathway	33	0.5281701805488216	1.6130335827202995	0.011082431042860188	0.04990968945176196	0.03625141917313947	3832	tags=45%, list=20%, signal=36%	RAPSN/NRG1/MUSK/LAMA4/DMD/LAMA2/EGFR/ARHGEF6/AGRN/NRG2/PAK3/UTRN/GIT2/ITGB1/JUN
Class 3 transiently induced by egf	Class 3 transiently induced by egf	218	0.39543866646723547	1.6119620627409705	2.2102045637648017e-4	0.002342998747431329	0.0017018144301892725	5441	tags=39%, list=29%, signal=28%	SERPINE1/CAVIN2/NR4A3/HOXA1/VGLL3/PHLDB2/NR4A1/NRG1/GEM/DLC1/PLPP3/PER1/TP63/RGS2/PSD3/ADAMTS9/FOSB/LATS2/DUSP1/IL6/FRMD6/MMP19/KLF4/NUMBL/RGS21/MAFK/PTGS2/PPFIBP1/PTP4A1/KDM6B/PYGM/HIVEP2/ASAP2/RUNX1/MPRIP/IGF1R/FNDC3A/EMP1/CSRNP1/PLK2/SIK1/STX11/SH3BP4/DUSP5/OLR1/SERTAD2/AFF1/ITPRIP/FOS/SLC20A2/MBNL2/RAPGEF2/PPP1R15A/TNFAIP3/TLE3/PPP1R3B/EPHA2/PLAUR/DENND3/TIPARP/RCAN1/PROS1/ANO6/KLF13/NFKBIZ/E…
Wnt signaling in kidney disease	Wnt signaling in kidney disease	36	0.5178063314447259	1.6117066842998933	0.009096434457491783	0.04315361908379159	0.031344212945995244	2295	tags=33%, list=12%, signal=29%	WNT6/WNT10B/MAPK10/WNT1/WNT9B/FZD7/FZD1/FZD2/WNT4/WNT3A/LRP6/WNT7B
Inflammatory response pathway	Inflammatory response pathway	30	0.5369367106269465	1.6115503762992511	0.010277531623679767	0.0471923733736169	0.03427772297793562	4397	tags=47%, list=23%, signal=36%	FN1/LAMB1/VTN/COL3A1/COL1A1/THBS1/COL1A2/TNFRSF1B/LAMB2/LAMC1/CD28/LAMA5/IL5/ZAP70
Lvad support of failing heart dn	Lvad support of failing heart dn	42	0.5073676249727417	1.6114468306771177	0.007706497079298496	0.038098088755485204	0.027672177493819446	2093	tags=33%, list=11%, signal=30%	PTGIS/JAM2/CXCL12/CCL21/RRAD/PDE4B/B3GALT2/F5/TGFBI/PTGER4/HBB/APLNR/CACNB2/KCNJ8
Acute promyelocytic leukemia up	Acute promyelocytic leukemia up	159	0.4074222859691661	1.6075753132656005	5.198528735640869e-4	0.0045471680893075985	0.0033027914672868	5339	tags=42%, list=28%, signal=30%	KLF2/CFD/HAL/PTGDS/MRC2/NLRP1/PER1/PLAGL1/BCL11B/RGS2/FOSB/DUSP1/STAB1/ST3GAL5/IRS2/COL4A5/GPR183/ADGRE2/PDE3B/MED13L/TSC22D3/GLIPR1/HIC2/CHST11/PLEKHA5/ZFP36/SPEN/NFYA/KLF6/JMJD7-PLA2G4B/SPRY2/CITED2/HGF/AAK1/SIK1/CD8A/FOS/TCF7L2/JUN/TPBG/FGF13/ID2/KAT6B/TGOLN2/ARHGAP25/TLR2/N4BP2L1/ZMYM2/DMXL2/FNDC3B/PTPRE/TMEM131/ANXA8/AUTS2/CSGALNACT2/SLC31A2/ANKS1A/ATP2B4/TCL1A/CBLB/AFF2/SIN3B/CD33/ZNF264/PL…
Sox9 targets in prostate development dn	Sox9 targets in prostate development dn	45	0.4951362543980276	1.6073277867736326	0.00992868108752276	0.04591792186976414	0.03335203748100106	4627	tags=42%, list=25%, signal=32%	SFRP1/HOXA10/SYT4/SLITRK1/NAV1/ZNF521/INHBA/SLIT2/BASP1/TCF4/RASSF2/IGF1/SPTBN1/CRMP1/TRIM8/ANKRD11/FBLN5/ETS1/PCDH18
Epithelial to mesenchymal transition up	Epithelial to mesenchymal transition up	130	0.41913656295084295	1.6054214558549131	8.178973314051304e-4	0.0065641060688379025	0.004767774819123641	4490	tags=42%, list=24%, signal=32%	TNXB/SERPINE1/FBLN2/FN1/PDGFRA/DDR2/LAMB1/CCN2/TIMP3/COL5A2/COL3A1/PKP1/ACTA2/TNC/ACKR3/PDGFRB/COL1A1/PCOLCE/GATA2/TGFB3/DCN/INHBA/IRGM/MMP2/CYP1B1/NR2F1/VIM/IL11/HTRA1/COL6A2/SPARC/CFH/MPDZ/DAB2/SNAI1/COL6A1/BRCA1/LY6H/ITGB1/PLA2G4A/COL18A1/PLA2G7/COL4A2/JUN/GAS1/PMP22/COL4A1/GADD45B/PDGFA/NCAM1/SDC1/CDH2/SDC2/PROS1
Liver cancer with h3k27me3 dn	Liver cancer with h3k27me3 dn	187	0.39879312957807167	1.6037344710593107	5.078214824706076e-4	0.004479042283918415	0.0032533089488660434	3173	tags=29%, list=17%, signal=25%	PCDH11X/ZFHX4/OR4N2/TMEM119/DTNA/SCUBE1/KCNIP1/PRG4/TTC6/GPC6/PCDHGC4/PCDHGC3/TNFSF4/PCDHGA8/PDGFRB/SHISA6/PCDHGB7/PCDHGC5/GP5/PCDHGB3/CHST15/ALPK2/BMP4/AGTR1/PROX1/PCDH11Y/ANKRD29/GRIK2/RCAN2/FAM217A/USH1C/ADAMTSL3/PCDHGB5/IGSF3/RECQL/HAUS7/SOGA1/SCN8A/GGN/TPTE2/PCDHGB4/PCDHGA7/TSHZ2/ATP8A2/TUB/PCDHGA6/ZFHX3/ULK1/RUNX1/ANKRD36C/COL27A1/NBPF15/CRMP1/PCDHGB6/TMEM132C
Immunoregulatory interactions between a lymphoid and a non lymphoid cell	Immunoregulatory interactions between a lymphoid and a non lymphoid cell	126	0.41989111995844575	1.6036603622936294	0.0022208342450851484	0.014455875107627447	0.010499884767819464	5360	tags=39%, list=29%, signal=28%	COL2A1/SIGLEC6/TREML2/CD1A/CD300LG/PIANP/CD22/COL3A1/COL1A1/CD1C/LILRA4/SIGLEC10/CD300LB/LILRB5/CD300E/COLEC12/COL1A2/TREML4/JAML/LILRA1/SIGLEC1/KLRD1/CD34/VCAM1/ITGA4/LILRA2/ITGB1/CD8A/SIGLEC11/FCGR2B/SIGLEC8/CD200R1/LILRB2/LILRA6/TREML1/LAIR1/CD300C/ITGB2/CD1B/SH2D1A/LILRB3/KLRG1/LILRB1/SIGLEC9/CD33/SIGLEC7/SIGLEC5/CD160/SLAMF6
Burkitts lymphoma up	Burkitts lymphoma up	38	0.5138070212609179	1.6027597962054168	0.008704238058619715	0.04178955731563079	0.030353439902146832	4282	tags=42%, list=23%, signal=33%	SOX11/TUBB2B/BACH2/LHFPL6/MME/LZTS1/ID3/APBB2/TUBA1A/TUBB2A/SLC35E3/BMP7/WASF1/SUGCT/RCBTB1/TFDP2
Egfr tyrosine kinase inhibitor resistance	Egfr tyrosine kinase inhibitor resistance	84	0.4428689436978852	1.600887930649977	0.004342621449077936	0.024721752160938703	0.017956405061322553	5301	tags=46%, list=28%, signal=33%	PDGFRA/NRG1/KRAS/PDGFRB/PDGFD/FGF2/AKT3/AXL/IL6/KDR/BCL2/PLCG1/EGFR/FGFR3/SHC2/MRAS/PIK3CD/NRG2/PLCG2/IGF1/AKT2/IGF1R/NF1/HGF/FOXO3/GAB1/SHC4/PIK3CB/GSK3B/MTOR/PDGFA/CCND1/SRC/JAK1/PDPK1/VEGFA/RAF1/GAS6/SHC1
Prostate cancer with h3k27me3	Prostate cancer with h3k27me3	173	0.4009386935086607	1.600454757091495	4.046008459468622e-4	0.0037491071192773994	0.0027231276170789384	2360	tags=29%, list=13%, signal=26%	SMR3B/IGF2BP1/EPB42/OTOR/SIGLEC6/ASCL4/ZIC1/ZIC4/SEMG2/EYA1/LIN28B/CD1A/KIRREL3/GABRA1/SLC8A3/COL14A1/LALBA/SLC17A6/ABCA6/GAP43/FGF23/ASTN1/CDH20/GFRAL/GJB6/ABCA9/SDR9C7/GPR15/KRT222/MARCO/OR8A1/ENPP2/GRM3/ACADL/LILRB5/OR52I2/OR2AG1/VWA2/ATOH1/ARPP21/NLRP14/POSTN/SLC22A25/ZPBP2/NR1H4/C1QTNF7/CHAT/JAML/PWWP3B/CSMD3/CCDC181
Trim24 targets up	Trim24 targets up	46	0.4904636096160123	1.5969163095329322	0.006920271027080155	0.03498845567371635	0.025413525645648423	5022	tags=54%, list=27%, signal=40%	SERPINE1/IGF2/COL1A1/TGM2/VIM/COL1A2/SPARC/EGR1/TGFB1/RAI14/CDKN2B/EMP1/VCAM1/SAMD4A/CYBB/FOS/COL4A2/TGFBR2/COL4A1/PDGFA/BTG2/APP/LAPTM5/CP/HCK
G protein signaling pathways	G protein signaling pathways	93	0.4369100900400714	1.595044848526157	0.004081983358488394	0.023367086958813562	0.016972457122135957	5929	tags=49%, list=32%, signal=34%	PDE1C/ADCY1/GNAO1/ADCY5/KRAS/GNA14/PDE4B/ADCY2/ITPR1/PDE7B/GNB3/PDE1B/ADCY7/PRKD1/GNG4/GNAZ/ADCY6/GNA12/GNG11/ADCY9/AKAP12/AKAP13/GNAL/PDE8B/ADCY4/AKAP6/PALM2AKAP2/GNGT1/GNG3/PRKD3/AKAP11/ARHGEF1/PRKACB/PDE4C/PRKCI/KCNJ3/PRKAR2B/GNG7/PRKCH/GNA15/GNGT2/PPP3CA/ADCY3/GNG13/PRKCG/NRAS
Oncofetal targets of let7a1	Oncofetal targets of let7a1	12	0.6757336415186911	1.5945663902071698	0.009955188759422825	0.045999221962821885	0.03341108901557531	2794	tags=42%, list=15%, signal=35%	IGF2BP1/LIN28B/HMGA2/COL4A5/FIGN
Tight junction	Tight junction	130	0.4158414322176365	1.592800095547683	0.001020782932004352	0.007837665671663817	0.0056928124923923	3704	tags=32%, list=20%, signal=25%	CTNNA3/CLDN19/MYH11/JAM2/MYH2/RAB3B/MYH7B/MYH1/MYH15/KRAS/ACTN3/CLDN5/AKT3/MYL10/MYH7/EPB41L3/CLDN11/MYL2/CLDN15/JAM3/PPP2R2C/CLDN14/AFDN/LLGL1/MYH8/AMOTL1/MPDZ/MRAS/CLDN20/MYH14/AKT2/EPB41L2/CLDN9/CLDN18/MYH4/MYH3/PARD6G/MYH10/CLDN8/MYH6/EPB41
Gnrh signaling pathway	Gnrh signaling pathway	100	0.4325495009201595	1.5927996115762835	0.0035385731084966315	0.020820595880600486	0.015122838009875515	3832	tags=35%, list=20%, signal=28%	PLA2G2A/CACNA1C/CAMK2A/ADCY1/PLA2G5/MMP14/ADCY5/CALML5/KRAS/CGA/ADCY2/MMP2/ITPR1/MAPK10/ITPR3/EGFR/ADCY7/ADCY6/PLA2G2E/CAMK2B/ADCY9/ITPR2/MAPK7/MAP3K4/JMJD7-PLA2G4B/PLD1/GNRH2/PLA2G12B/PLA2G1B/ADCY4/CACNA1S/PLA2G4A/PLCB2/CACNA1D/JUN
Tp53 hras cooperation response dn	Tp53 hras cooperation response dn	67	0.4570863498673844	1.5903067161197202	0.009138361515012808	0.043249108698020976	0.03141357090173761	3406	tags=34%, list=18%, signal=28%	COL9A3/SFRP2/SEMA3D/HOXC13/ELAVL2/CPZ/ARHGAP24/PRKG1/NOTCH3/SBK1/SBSN/NBEA/PRKD1/EPHB2/WNT9A/SATB1/RPRM/STMN4/TEX15/UNC45B/PLXDC2/RB1/PARD6G
Gaba receptor activation	Gaba receptor activation	60	0.4668101421919024	1.5894456445799876	0.008214045047708103	0.0400440161536805	0.029085582998188576	4028	tags=48%, list=21%, signal=38%	GABRA1/GABRQ/GABRA4/KCNJ15/GNAT3/ADCY1/GABRG2/ADCY5/KCNJ10/KCNJ6/GABRA3/ADCY2/GNG2/GNB3/ADCY7/GNG4/GABBR1/ADCY6/GNG11/KCNJ4/KCNJ9/ADCY9/GNAL/GABRA5/ADCY4/KCNJ12/GNGT1/KCNJ5/GNG3
Aml with npm1 mutated dn	Aml with npm1 mutated dn	243	0.38768286053188267	1.5891249016634168	1.6773669980300144e-4	0.0018426001650001353	0.0013383547700587368	4145	tags=39%, list=22%, signal=31%	DCHS1/BPI/MYH11/KIT/FCER1A/CLIP3/HSPG2/PXDN/XYLT1/ALAS2/CACNA2D2/MN1/PCDHGC3/RHOBTB3/TPSAB1/CCND2/CEACAM4/SERPINE2/CAVIN1/CD1C/CLEC10A/PDE4B/PLXND1/CSF3R/MMP9/PALM/PAM/SERPINF1/RUNX3/GATA3/TGFBI/TFPI/THSD7A/CAV1/FZD2/FOXO1/ITM2C/CLDN15/SPARC/ELANE/PTGER4/PROM1/CYTL1/MAN1A1/DPYSL2/NT5E/NBL1/PDE3B/MPO/RGS1/RPS6KA2/DACH1/SNCA/DSE/FHL1/EPS8/ST18/NRXN2/CST7/TMEM204/SCRN1/NEDD4/PTGIR/ERG/TGFB1I1/SYNGR1…
Cell junction organization	Cell junction organization	89	0.4372604857637943	1.5869150866002126	0.005637494605828495	0.03015936705929572	0.021905963937519677	4550	tags=40%, list=24%, signal=31%	FLNC/CADM2/CDH10/CLDN19/CDH7/SDK1/CDH18/CDH8/CLDN5/CDH11/CLDN11/CLDN15/CLDN14/AFDN/DST/ARHGEF6/CDH5/FBLIM1/CDH4/CLDN20/LIMS2/CDH3/CLDN9/CLDN18/PXN/SDK2/ITGB1/PARD6G/CLDN8/LAMB3/PARVA/CDH24/FLNA/ANG/CDH2/PRKCI
Hematopoiesis stem cell	Hematopoiesis stem cell	188	0.39404772084011475	1.5858133307329443	7.938483408707325e-4	0.006410511993990616	0.0046562132516011455	5550	tags=46%, list=30%, signal=33%	SEMA3D/SLC35F1/CXCL14/NR4A1/WNT6/SV2A/GEM/KCNJ6/IGDCC4/PDE4B/SASH1/LRRTM4/TRIM9/SYN2/PRKG1/NRXN1/NKAIN3/NFATC2/GATA3/KIF5A/SLIT2/MEX3A/SEPTIN3/SGSM1/SYT11/TCTN2/RASD1/EGR1/CDK14/EMCN/TCF4/PEAK1/ETV1/HYAL1/AGXT/ENG/USP34/PYGM/LPAR4/DNMT3A/IQGAP2/ZBTB20/ROBO4/ESR1/CCDC136/FAM168B/EMP1/MEF2D/ZDBF2/DUSP5/PARD6G/PKD2/COL18A1/IFT81/SOCS5/SLC41A1/NRXN3/JUN/CDIP1/COL4A1/TGOLN2/ASH1L/TBXA2R/ZBTB37/ZC2HC1A…
Targets of runx1 runx1t1 fusion hsc up	Targets of runx1 runx1t1 fusion hsc up	180	0.39566460071358134	1.585699478048361	0.0011205345966531493	0.008433552650355398	0.006125629223605231	3818	tags=37%, list=20%, signal=29%	NCAN/PSG9/VCAN/TNFSF4/COL3A1/CH25H/ACTA2/HLF/FSTL1/HOXA5/NLRP1/PDE4B/RGS2/NID1/NEDD9/RGS13/FZD7/ID1/AGTR1/TFPI/THSD7A/SPARC/CALCRL/KIF3C/ALDH1A2/MFAP2/PLCG1/NPTX1/RGS1/BAMBI/IL1RL1/EPS8/PPFIBP1/SENP7/FAR2/DAB2/TUBA1A/PALLD/ERG/TGFB1I1/SLC2A3/ZBTB20/SPTBN1/MALL/S1PR1/RUNX1/TXNIP/KLF6/CD69/EMP1/SOCS2/RB1/ZFYVE16/LILRA2/KLHL24/MARK4/ARID5B/WSB1/ECM1/CDC42EP3/RAB33A/ZDHHC17/SMARCA1/FNBP1L/CEP162/TCF7…
Pubertal breast 6 7wk up	Pubertal breast 6 7wk up	186	0.3948504379609963	1.5847995694149537	6.882046018554539e-4	0.005718758239934353	0.004153764617310932	7616	tags=60%, list=41%, signal=36%	PI16/LALBA/PRRX1/LRATD1/CSN2/GPD1/TPSAB1/CCND2/CAVIN1/IGFBP4/EHD2/SLC2A4/LAMA4/TIMP2/ZEB2/IGFBP5/CYGB/FSCN1/KCNB1/DPYSL3/SH2B3/NDST1/KCNK3/TAOK1/ZBTB20/AKT2/EPAS1/RUNX1/EPB41L2/ABCC3/TPR/STAT5B/ATP6V0A1/ITSN2/SOD3/ECM1/NFATC3/GPAM/FTO/CA8/QKI/MEF2C/TNS1/CRIM1/PRKACB/LASP1/KIAA0100/ETS1/EXTL3/BTN1A1/PRELP/WNK1/KDM5A/GALNT2/IL6ST/GRB10/CP/LPGAT1/NR2C2/SNTB2/SORBS1/SOX9/BRD4/ARHGEF2/NFIX/FADS2/MAPK8…
Alveolar rhabdomyosarcoma dn	Alveolar rhabdomyosarcoma dn	407	0.3689555983273145	1.584231965544376	1.0692099574824254e-5	1.812029506891268e-4	1.316150068853886e-4	4473	tags=31%, list=24%, signal=24%	EFEMP1/LRP1/KLF2/FN1/ITGBL1/FBN1/THBS2/COL8A1/COL5A1/PDGFRA/XYLT1/NRG1/MMP14/FXYD5/CCN2/COL8A2/COL5A2/VCAN/MRC2/FSTL1/SERPINE2/PDGFRB/CAVIN1/COL1A1/NGF/ADAMTS2/PCOLCE/PLPP3/LOX/FAP/INHBA/MMP2/FGF2/PAM/GPR176/IGFBP3/LAMA4/ID3/PAPSS2/THBS1/TGFBI/AXL/DUSP1/FZD1/CAV1/CD248/FZD2/TIMP2/ITGA5/GNB3/HTRA1/COL6A2/TWIST1/ELK3/CCN1/NT5E/TGFB1/EGFR/FSTL3/CREB3L1/PRKD1/GLIPR1/SRPX2/DPYSL3/GNS/ENG/DAB2/RAB31/ND…
Mutated and amplified in breast cancer	Mutated and amplified in breast cancer	93	0.433606068795485	1.5829827282278706	0.004784831900156825	0.02645005788584545	0.019211743172642324	5466	tags=53%, list=29%, signal=38%	FABP4/ZFHX4/GRIN2C/CACNA1G/HOXA4/HOXA3/ZCCHC24/GDF6/MYH7B/SULF2/CACNA1H/RADIL/AHRR/NID2/HEPACAM2/SLCO2B1/ANK1/EP400/CSMD3/AGAP2/MYO9B/ADGRB1/FGFR1/SIGLEC1/DYRK2/KCNQ3/NCOA6/ARC/ZCCHC14/PCNT/ZFC3H1/PIGS/HOOK3/CHD7/ZNF569/HCN3/KIAA0100/ZNF529/TAC4/SEPTIN4/IKBKB/ARRB1/ATRN/ZMIZ1/ARFGEF2/THBS3/VPS13B/NUFIP2/UTS2R
Major depressive disorder dn	Major depressive disorder dn	158	0.4007483118901122	1.5813972150597309	0.0012325197053941177	0.009044434222575642	0.00656933713248946	3364	tags=25%, list=18%, signal=20%	PLP1/NTRK2/COL16A1/SPOCK1/TF/MAG/ASPA/BCAT1/ABCA8/EPHA5/EFS/OLIG2/CDKN1C/LILRA4/ENPP2/MAPT/LIPE/CYP19A1/COL4A5/APOD/JAM3/KIF1B/ST18/APLP1/HTR4/CNTN2/ABCA2/MYO9B/SOX10/ARHGEF10/KIF13B/CAP2/NKX2-2/HSPA2/PLAGL2/P2RX7/AAK1/MYRF/DYNC1LI2
Aml prognosis	Aml prognosis	79	0.44195040707341293	1.5809630039136016	0.005824039996606883	0.030806421008746063	0.02237594530199662	5893	tags=52%, list=31%, signal=36%	HOXA4/HOXA10/PXDN/HOXA9/TSPAN32/ADGRB2/COL1A1/ANGPT1/AGT/TGM2/FOXO1/BAHCC1/SRPX/PMEPA1/NBL1/PLCG1/TCF4/AGRN/FARP1/TMEM158/S1PR1/FGFR1/TUBB2A/VASN/SKAP2/PALM2AKAP2/PMP22/PBX3/PIK3R4/NR2F2/DMWD/IL6ST/SLC7A7/PLIN2/MSI2/TBXAS1/GLUL/SNX9/UGGT2/DENND4B/CKMT1B
Tnf response via p38 partial	Tnf response via p38 partial	162	0.3995522318653214	1.5774172539163958	9.461016559140959e-4	0.007363014699802752	0.005348054359635254	5283	tags=43%, list=28%, signal=31%	DKK1/SERPINE1/TUBB2B/HOXA9/TGFB2/TNC/LHFPL6/HOXA5/PLPP3/RGS2/INHBA/BMP2/ID3/IRS1/FZD7/THBS1/ID1/DUSP1/IL6/FOXO1/PTGER4/BMP5/EGFR/IRGQ/FLRT3/SNCA/AGRN/GLIPR1/CHST11/KDM6B/FGD6/KANK2/HIVEP2/TSC22D2/KLF6/TUBB2A/BAHD1/DNAJB4/SPHK1/PTX3/PDE8B/CITED2/PLK2/LAMC1/PTHLH/REL/PLAU/RXRA/TCF7L2/JUN/TNFAIP3/ID2/SLC39A14/PLAUR/TRIB2/FNDC3B/TIPARP/HAS2/KLHL21/SLC31A2/FOSL2/TCIM/SLC12A7/NR2F2/IL6ST/GABARAPL1/GABR…
Breast ductal carcinoma vs lobular normal dn	Breast ductal carcinoma vs lobular normal dn	67	0.4533674896030585	1.577367960769918	0.01046756249492237	0.04785171426250226	0.03475662884177745	2760	tags=40%, list=15%, signal=34%	ATP1A2/ADH1B/SFRP1/NTRK2/MYH11/BACH2/GHR/PI15/CFD/ZBTB16/CRISPLD1/ACTG2/FOSB/CAV1/SAA1/IQCN/ECRG4/PROM1/MGP/FAM126A/CNN1/ROPN1/IQCA1/PIGR/PAK3/MYLK/TMEM150C
Gaba b receptor activation	Gaba b receptor activation	43	0.49137182764612075	1.5754748790713846	0.010524526961548791	0.048015338444446776	0.034875475680371096	4028	tags=53%, list=21%, signal=42%	KCNJ15/GNAT3/ADCY1/ADCY5/KCNJ10/KCNJ6/ADCY2/GNG2/GNB3/ADCY7/GNG4/GABBR1/ADCY6/GNG11/KCNJ4/KCNJ9/ADCY9/GNAL/ADCY4/KCNJ12/GNGT1/KCNJ5/GNG3
G alpha 12 13 signalling events	G alpha 12 13 signalling events	80	0.4394502276380732	1.5745997392404525	0.005160631344222438	0.028075578337311505	0.0203924241968663	6371	tags=61%, list=34%, signal=41%	ADRA1A/PLEKHG2/PREX1/RASGRF2/GNG2/OBSCN/GNB3/TIAM2/ARHGEF40/ARHGEF15/GNG4/ARHGEF6/FGD4/MCF2/RHOB/GNA12/GNG11/ARHGEF10L/ARHGEF10/MCF2L/AKAP13/ADRA1D/ADRA1B/ROCK2/ARHGEF17/VAV2/ABR/GNGT1/GNG3/TBXA2R/ARHGEF1/TRIO/GNG7/ITSN1/KALRN/GNGT2/ARHGEF2/NGEF/ARHGEF33/ARHGEF11/ARHGEF7/GNG13/FGD1/BTK/FGD2/PLEKHG5/VAV1/GNB4/ARHGEF9
Breast cancer 20q12 q13 amplicon	Breast cancer 20q12 q13 amplicon	142	0.40620034767601076	1.5740723616440824	0.0012575032129358906	0.009176567355588822	0.006665310752925437	3573	tags=27%, list=19%, signal=22%	COL9A3/SEMG1/SEMG2/NPBWR2/CBLN4/NKAIN4/MYT1/KCNS1/BIRC7/NTSR1/SULF2/APCDD1L/BHLHE23/PREX1/MC3R/WFDC5/PHACTR3/NFATC2/OPRL1/WFDC12/GATA5/COL20A1/PMEPA1/TP53TG5/TSHZ2/CDH4/SNAI1/CTCFL/SYCP2/RIPOR3/LIME1/KCNG1/ZBTB46/NCOA3/STK4/CASS4/BMP7/RTEL1/LAMA5
Angioimmunoblastic lymphoma dn	Angioimmunoblastic lymphoma dn	130	0.4105773952963819	1.572637221284705	0.0014144998640435323	0.010149726043944677	0.007372155133667729	6647	tags=51%, list=35%, signal=33%	NR4A3/PER1/RGS2/FOSB/GATA3/PTGER4/IRS2/KLF4/RGS1/TSC22D3/PTP4A1/KDM6B/SLC2A3/TSC22D2/ZFP36/JMY/TSPYL2/EIF4G3/HECA/KLF6/TUBB2A/WIPF1/CD69/CSRNP1/SIK1/PHF1/REL/IRF2BP2/THAP2/ZNF331/ETNK1/ZFC3H1/JUN/PPP1R15A/TNFAIP3/HIPK1/CD6/ID2/GADD45B/TTC7A/ZBTB24/TIPARP/MGAT4A/LY9/TP53INP2/CSGALNACT2/FOSL2/PCIF1/GABARAPL1/COG3/MXD1/DUSP4/EPC1/CHD1/SON/FOXP1/CNST/MCL1/PPP1R15B/IKZF5/C16orf72/CCNL1/KDM3A/RGCC/NR4A…
Class a 1 rhodopsin like receptors	Class a 1 rhodopsin like receptors	318	0.3722494976891586	1.5707871494854047	1.2614747409908677e-4	0.0014442484145744333	0.0010490158372450373	2870	tags=29%, list=15%, signal=25%	NPY5R/PTGFR/HTR1E/GPR17/SSTR1/ADRA1A/MC5R/PROKR1/AVPR2/HTR5A/NPBWR2/FFAR1/NPFFR2/ADRB3/TAC3/CXCL12/HTR6/NMBR/NTSR1/ADRA2B/PENK/PLPPR5/HTR7/HCRTR1/RHO/ADRA2A/CCL21/MLNR/NPY1R/FFAR3/RGR/DRD1/ACKR3/HTR2A/ACKR1/CGA/AGT/CCKAR/EDNRA/HRH2/BDKRB1/MC3R/SSTR3/CCL16/HTR1D/GPR55/OPRL1/NTSR2/ADRB2/GPR68/AGTR1/NPBWR1/NPSR1/SAA1/OXER1/P2RY12/PTGER4/PROK1/ADORA2A/APLNR/GPR183/C5AR1/AVPR1B/S1PR5/PPY/HCAR2/CXCR1/H…
Cerebellum markers	Cerebellum markers	85	0.43530908429055204	1.57064180005116	0.0059085539856841215	0.03101617010962537	0.022528294528383095	4233	tags=35%, list=23%, signal=27%	ZIC1/NKAIN4/KIT/ZNF521/DMRTC2/TNC/ZIC2/LHX1/DMD/MCC/PRL/SOGA1/AFAP1L2/KANK2/H6PD/HEPACAM/RNF182/NAT8/PLXDC1/ERC1/IL16/CASQ2/COL18A1/LRCH1/NTN1/CALB2/CHD7/ZNF385C/ARHGAP5/SLC9A3
Hgf targets repressed by akt1 dn	Hgf targets repressed by akt1 dn	85	0.43465811463591864	1.5682930318149113	0.0059085539856841215	0.03101617010962537	0.022528294528383095	4239	tags=41%, list=23%, signal=32%	PSG4/CDH10/CYP1A2/CIDEC/PRRX1/PSG1/WNT6/CTXND1/CYP2A6/GPX3/PDGFD/TP63/MMP9/ADAMTS9/MCC/KIF5A/FAXDC2/FMOD/CYP2C9/PIK3R5/BRCA1/SIGLEC1/ITK/ADAM21/SLC22A14/RARB/ATN1/NFAT5/GNPTAB/FXYD3/SLC5A5/RFPL3/RANBP2/TBXA2R/LYST
G alpha q signalling events	G alpha q signalling events	211	0.38660133708352074	1.5672551808560888	5.226070609736979e-4	0.004563511149383884	0.0033146620905646676	6012	tags=52%, list=32%, signal=36%	PTGFR/GPR17/ADRA1A/PROKR1/FFAR1/NPFFR2/TAC3/NMBR/RGS4/NTSR1/MMP3/HCRTR1/MLNR/FFAR3/KRAS/GPRC6A/HTR2A/GNA14/AGT/CCKAR/EDNRA/GRK5/BDKRB1/RGS2/ITPR1/GNG2/RGS13/GRM1/NTSR2/GPR68/AGTR1/NPSR1/SAA1/RGS17/GNB3/ITPR3/PROK1/AVPR1B/EGFR/DGKB/RGS1/RPS6KA2/GNG4/TRPC7/RGS21/BDKRB2/RGS16/DGKI/GHRL/LPAR4/GNG11/AVP/ITPR2/F2R/MAPK7/DGKD/GNRH2/ADRA1D/DAGLA/HTR2C/TACR3/ARHGEF25/PLCB2/LPAR5/ADRA1B/GAST/GNGT1/OXT/MCHR…
Elavl1 targets up	Elavl1 targets up	169	0.39546734710649967	1.5670500048339024	0.001235099796752834	0.009044434222575642	0.00656933713248946	3626	tags=33%, list=19%, signal=26%	SCUBE3/PAPPA2/CDH10/MYH11/FOXD1/CXCL12/ADAMTS5/C21orf62/HOXA6/COL11A1/NRK/HMCN1/EPHA4/ALDH1A3/PRSS35/HOXA5/ADAMTS10/GPX3/IRGM/MMP2/EPHA7/OLFML2B/ANKRD1/TGM2/IGF2R/FOXF1/FIBIN/BMP4/NOTCH3/PLEKHH2/KIF21B/EMCN/ALX1/LDB2/FBXL7/KLHL30/ENG/ANKRD44/PGPEP1/IGF1/PDE5A/RFLNB/KCNMB1/TXNIP/MPEG1/SPON2/ABLIM1/RARB/CYBB/KLHL24/CCL17/SUSD2/MYOM1/LAMA5/ADGRF5
Pubertal tgfb1 targets up	Pubertal tgfb1 targets up	168	0.3957686945924076	1.5657235089365702	0.0010138899170129589	0.007808013232362876	0.0056712747305185576	5189	tags=40%, list=28%, signal=29%	GFRA1/COL16A1/FN1/HSPG2/COL8A1/MMP14/DKK3/VCAN/TPSAB1/ACTA2/TNC/PCOLCE/MMP2/ACTG2/CDH11/TGM2/LPL/KDR/TIMP2/HTRA1/BASP1/CCN1/CNN1/FHL1/DPYSL3/EPAS1/RUNX1/EPB41L2/F2R/DUSP16/STAT5B/CDKN2B/UTRN/NOTCH4/SOCS2/GJA1/BMP1/F3/VASN/EGR2/CALD1/ECM1/CITED1/SMARCA1/CA8/QKI/TLE3/MEF2C/WNT5A/TNS1/CRIM1/TAGLN/PTPN14/PRKACB/PIAS3/LASP1/HAS2/ETS1/EXTL3/CD14/GALNT2/GRB10/CP/PTPRK/SNTB2/SOX9/VEGFA
Elavl1 targets dn	Elavl1 targets dn	143	0.4036607305719694	1.565128413806792	0.0020349152243551616	0.013562591508250703	0.009851056883751073	3090	tags=29%, list=16%, signal=24%	FGF10/FBN2/HOXD13/SFRP2/PRG4/PDGFRA/AEBP1/TNN/CLMP/THBS4/STMN2/SIGLEC10/IGSF10/IGFBP4/ADAMTS9/CCBE1/ANGPTL2/TGFBI/FAM131B/SLCO2A1/LAMA2/COL6A2/HOXD11/GJB2/HAUS7/FAM126A/IL1RL1/EPS8/PKDCC/BTBD11/PLXNC1/FST/EDIL3/IQGAP2/GGT7/COL6A1/CDH3/VEGFD/TMEM45A/TEP1/SGCD
Olfactory transduction	Olfactory transduction	200	0.38783824603385997	1.5644040271195547	4.3686702849468314e-4	0.003990390375014207	0.0028983813711947345	3588	tags=42%, list=19%, signal=34%	OR3A1/OR1G1/PDE1C/OR4N2/OR56A4/OR2C3/OR11H4/OR8B8/OR56A5/CAMK2A/OR56A1/OR52L1/OR1E1/OR3A2/CALML5/OR52E4/OR3A3/OR13C2/CNGA3/OR2L2/CLCA2/OR52E2/OR2L13/OR2AG2/OR13A1/OR51B5/OR52W1/OR52B6/OR1C1/OR8A1/OR56B4/OR2B2/OR52N5/PRKG1/OR51M1/OR2H2/OR52I2/OR2AG1/OR2L3/OR8S1/OR2B11/OR51E2/OR6C75/OR10A5/OR52N1/OR51E1/OR6B2/OR8B12/OR2AK2/OR2T2/OR51Q1/OR2S2/OR13H1/OR8D2/OR6B1/OR52D1/OR52E6/OR10AG1/CAMK2B/OR2AE1/OR…
Targets of pax3 foxo1 fusion up	Targets of pax3 foxo1 fusion up	250	0.38082183623247623	1.5642649266582807	3.4255269980567075e-4	0.003268976965214715	0.00237438973343787	4350	tags=39%, list=23%, signal=31%	OMD/COL16A1/CD36/ADAMTS5/GNAO1/C21orf62/AEBP1/SLIT3/AQP6/PLN/CELA3B/EFS/MYH1/NEBL/EPHA4/ACTA2/CAVIN1/COL1A1/DES/COL6A3/TP63/DCN/RGS2/IGFBP4/EPB41L3/TGM2/ACADL/NR2F1/ADAM30/DMD/FAM131B/HIVEP3/SLIT2/ABLIM3/CALCRL/LRRN3/ACHE/MAN1A1/ALDH1A2/NT5E/PLSCR4/IRGQ/FER/CLSTN2/TMEFF1/ARHGEF6/DACH1/RUSC2/MYH8/FHL1/PBXIP1/PTPRG/HBA1/PLXNC1/CAMK2B/MRAS/PAN2/PYGM/MUC3A/GNG11/TXNIP/KLF6/MAPK7/LTBP1/GOLIM4/UTRN/MYH…
Bound by pml rara fusion	Bound by pml rara fusion	439	0.36117050624952923	1.5639200126563975	3.24625598445772e-5	4.6717069362922273e-4	3.3932490516751533e-4	5424	tags=37%, list=29%, signal=27%	CACNA1C/OLIG1/KLF2/SLC7A10/SCUBE1/C11orf21/AJAP1/ZBTB16/MN1/SULF2/CELF2/OLIG2/ADAMTS10/TOX2/SH3PXD2A/IRAG1/PLXND1/GRK5/PREX1/INHBA/ITPR1/MMP9/FOSB/RUNX3/LATS2/KSR1/CHST15/ID1/NPAS4/NLRP3/HIVEP3/TIMP2/GAS7/NCOR2/C5AR1/ADGRE2/CPNE9/RPS6KA2/WDR81/SKI/NRXN2/PTPRJ/WNT9A/FXYD6/SMG6/RAB31/ATP8B4/PLCG2/PGPEP1/HDAC4/ADCY10/RAB11FIP1/H6PD/HIVEP2/MYO9B/CDH23/SPTBN1/SPN/CRTC1/MAFB/RUNX1/ITPR2/ECE1/GRIP2/IQSE…
Adipogenesis 9	Adipogenesis 9	85	0.4319494723224826	1.5585199602379571	0.00635030261842748	0.03282970452725287	0.023845537674563575	3622	tags=32%, list=19%, signal=26%	CXCL12/SFRP2/THBS2/GEM/NEDD9/C16orf89/ID3/LATS2/FZD2/CYTH3/KLF4/CCN1/TSPYL4/PTGS2/RECK/DNM1/AKAP12/CDKN2B/SLC8A1/VCAM1/CITED2/PLK2/F3/SKAP2/PLA2G4A/FOS/ROCK2
Response to tsa up	Response to tsa up	77	0.4367148260630451	1.558299588113209	0.0045265206879098385	0.02554286372849013	0.0185528114896172	2081	tags=26%, list=11%, signal=23%	FBN2/NGFR/COL11A2/CD36/CCN2/TIMP3/VTN/BMP6/PDGFRB/IGFBP4/FOSB/BMP4/TIMP2/COL1A2/MMP19/ITGA7/LUM/TGFB1/EFNB3/ANK1
Hypoxia up	Hypoxia up	469	0.35879125675602075	1.558084913773024	1.8921675882548067e-5	2.918696830745139e-4	2.1199671529296686e-4	4634	tags=35%, list=25%, signal=27%	DCHS1/SERPINE1/PTGIS/FOXD1/CCN5/CXCL12/SPOCK1/DTNA/TCF7L1/HIF3A/COL5A1/PXDN/NUAK1/DKK3/LAMB1/TSLP/BGN/MN1/CELF2/CUBN/ENPP1/CLIP2/ACKR3/CAVIN1/FILIP1L/CDKN1C/KANK3/LOX/GRK5/NDUFA4L2/TGFB3/INHBA/MMP2/ITPR1/CYP1B1/FGF2/NEDD9/PAM/IGFBP3/CHST15/BHLHE41/TGFBI/AXL/RNASE4/DUSP1/CAV1/N4BP3/VWF/SHOX2/COL1A2/HTRA1/IGFBP5/PTPRB/CDK19/PPARG/ADORA2A/KLF4/SCNN1B/CCN1/COL4A5/APOD/DPYSL2/EGR1/SRPX/ADGRE2/EGFR/PPP…
Tgfb1 signaling via nfic 1hr dn	Tgfb1 signaling via nfic 1hr dn	105	0.41655876119766394	1.557062862230926	0.00508780684378218	0.02782630664454967	0.02021136811894698	2688	tags=26%, list=14%, signal=22%	COL2A1/TUBB2B/MYH11/PTH1R/RGS4/HMGA2/IGF2/ZCCHC24/GPC6/CACNA1H/COX6B2/COL3A1/PEG3/CDKN1C/ANGPT4/IGF2R/FAT4/RGS17/PTK7/ST3GAL5/PARM1/CREBBP/TSPAN5/MAP1B/LUZP1/LOXL2/SPTBN1
Aml with pml rara fusion	Aml with pml rara fusion	76	0.43989740725487897	1.5568111206806048	0.00459458866817916	0.02581387221206001	0.018749655874851532	5098	tags=41%, list=27%, signal=30%	COL2A1/CPA3/PXDN/CFD/PTGDS/MRC2/CDKN1C/MMP2/RASL12/STAB1/MAP1A/PDE3B/MPO/AGRN/CST7/ITPR2/CHN2/S100B/NISCH/HGF/MEGF6/FGF13/TNFRSF4/FNDC3B/ATG13/ANXA8/AUTS2/LDLRAD4/GRB10/TMEM94/AFF2
Midbrain markers	Midbrain markers	82	0.43109511742446305	1.555194224147362	0.007908161280729993	0.038876762326642104	0.028237759494772127	2115	tags=24%, list=11%, signal=22%	GFRA1/PLP1/PRPH/ZFHX4/GABRQ/SLC8A3/KANK4/SLC17A6/BCAT1/VAT1L/PTGDS/EN1/AGT/GLRA4/PCOLCE2/ITGA10/PCSK1N/ARHGEF40/EPHB1/TSC22D3
Cell cell junction organization	Cell cell junction organization	62	0.45334105206845715	1.5545542415210774	0.009150141397679126	0.043249108698020976	0.03141357090173761	3619	tags=35%, list=19%, signal=29%	CADM2/CDH10/CLDN19/CDH7/SDK1/CDH18/CDH8/CLDN5/CDH11/CLDN11/CLDN15/CLDN14/AFDN/CDH5/CDH4/CLDN20/CDH3/CLDN9/CLDN18/SDK2/PARD6G/CLDN8
Tceb3 targets up	Tceb3 targets up	167	0.39305358142915103	1.5543616836641823	0.0021365942153481437	0.01402259031525304	0.010185172558582168	4052	tags=33%, list=22%, signal=26%	FBLN2/KIT/GHR/LAMA1/SPOCK1/PTH1R/SEMA6A/HSPG2/PXDN/NR4A1/LAMB1/CYP26A1/TIMP3/CCND2/NID1/IGFBP4/NID2/THBD/TFPI/EPHB4/SPARC/CCN1/COL4A5/PDE1B/CREB3L1/FLRT3/GREM2/CDH5/GNS/SNAI1/SFMBT2/GNA12/ZFHX3/EPAS1/FNDC3A/AMOTL2/DYRK2/CITED2/LAMC1/F3/AQP8/ITGB1/RNF24/RAMP2/SUSD2/FAM189A2/MYH6/CITED1/MBNL2/FBXL22/COL4A2/TCF7L2/ENPEP/COL4A1/ID2
Targets of ewsr1 ets fusions up	Targets of ewsr1 ets fusions up	258	0.376627606082495	1.5532193715878182	3.622543558122605e-4	0.0034119459618734303	0.0024782338784038994	3722	tags=32%, list=20%, signal=26%	IGF2BP1/NGFR/CES1/KIT/MEDAG/KLF2/ELN/KCNE4/MMP3/HMCN1/MDFI/JCAD/C1QL1/PRSS35/NANOS1/TMEFF2/TOX2/GATA2/GRK5/PREX1/NID1/CDH11/TGM2/NTNG1/KSR1/BHLHE41/FZD7/HS3ST3B1/FAM43A/ARRDC2/ZEB2/ST3GAL5/PADI2/DPYSL2/BAHCC1/CDK14/COL21A1/HSD17B2/PGF/ARHGEF6/FLI1/TSC22D3/PHOSPHO1/EPHB2/SH2B3/TMEM44/FARP1/RAB11FIP1/STAR/ITGAM/ADCY9/SPTBN1/MALL/MAFB/MGAT5/FGFR1/OPN3/FYN/NKX2-2/AKAP13/DGKD/CMTM3/ADRA1D/HIP1R/SIX1/R…
Hcmv infection 20hr dn	Hcmv infection 20hr dn	99	0.42174849862809055	1.5531394794830597	0.004662697997583283	0.02604775960558273	0.018919537716134076	3012	tags=34%, list=16%, signal=29%	PTGFR/RGS4/LRRC15/CCN2/RHOBTB3/FILIP1L/PDE4B/ROR2/FRY/FGF2/AKT3/AXL/SYNE1/TFPI/BICC1/IGF2BP3/COL1A2/SLC35E2B/SYT11/SVIL/DST/SRPX2/FST/FARP1/LILRA1/TMEM158/RHOBTB1/MAP3K5/TRAM2/F2R/TNKS/LTBP1/CAP2/REV3L
Tip30 targets up	Tip30 targets up	46	0.4768488647557305	1.5525876219580572	0.011107245790015338	0.04997775572939653	0.03630085845415264	3261	tags=30%, list=17%, signal=25%	LAMB1/MMP3/VCAN/ENPP1/NEDD9/IGFBP3/IRS1/AXL/DUSP1/CALCRL/CCN1/FYN/IGFBP1/RAPGEF5
Breast cancer grade 1 vs 3 dn	Breast cancer grade 1 vs 3 dn	52	0.470299736692666	1.5514305653229719	0.010692144606888353	0.04861953134570944	0.03531432533793664	4188	tags=44%, list=22%, signal=34%	FRY/RNASE4/SYNC/CYBRD1/ARHGEF40/RGPD5/RUNX1/KIF13B/STAT5B/NF1/LTBP3/LAMB2/CX3CR1/CRY2/STARD13/FOS/NBR1/TP53BP1/WDR19/NYNRIN/ZFP2/AASS/AKAP11
Myometrial relaxation and contraction pathways	Myometrial relaxation and contraction pathways	155	0.39453135645102066	1.5511591993456557	0.00204332027540465	0.013565961416088604	0.009853504583645594	4480	tags=39%, list=24%, signal=30%	CRH/GPR182/ACTC1/CAMK2A/ADCY1/RGS4/ADCY5/NOS1/ACTA2/ACKR3/PDE4B/GRK5/ADCY2/RGS2/ITPR1/IGFBP4/GNG2/IGFBP3/IL6/RGS17/MYL2/GNB3/IGFBP5/ITPR3/PLCG1/CNN1/ADCY7/RGS1/PRKD1/GNG4/RYR1/ADCY6/CAMK2B/RGS16/PLCG2/GNG11/CRHR1/ADCY9/ITPR2/CACNB3/CNN2/PKIA/SLC8A1/IGFBP1/ATP2A3/GJA1/ADCY4/RAMP2/CALD1/FOS/JUN/GNGT1/OXT/CALCA/GNG3/IGFBP6/RGS18/DGKZ/RGS7/PRKACB
Gap junction	Gap junction	89	0.4272854133335232	1.5507133408561937	0.009906560053587917	0.04591792186976414	0.03335203748100106	3599	tags=34%, list=19%, signal=27%	TUBB2B/ADCY1/PDGFRA/ADCY5/DRD1/KRAS/HTR2A/PDGFRB/PDGFD/ADCY2/ITPR1/GJD2/GRM1/PRKG1/TUBB4A/ITPR3/EGFR/ADCY7/ADCY6/TUBA1A/ADCY9/ITPR2/ADRB1/TUBB2A/MAPK7/GJA1/HTR2C/ADCY4/PLCB2/TUBB3
Tfrc targets up	Tfrc targets up	355	0.3648046802336704	1.5489986045237203	9.44392599239153e-5	0.0011502389293806421	8.35464897423215e-4	5122	tags=40%, list=27%, signal=30%	COL2A1/IGFN1/DPYSL5/PCDH11X/CA10/FOXE1/AVPR2/NR4A3/DSPP/BIRC7/ADGRA2/SEMA6A/POU3F1/SHE/ART4/GALNT13/MYH1/KRAS/RRAD/PDE4B/RGS2/NID1/PLAC9/TPPP2/ENPP2/GATA4/ACACB/NHLH2/PAPPA/THBS1/DUSP1/SYNE1/TFPI/GRIK2/DYNC1I1/HMCN2/CYP19A1/ARPP21/PCDHB12/PADI4/PCYT1B/IGSF3/SPOCD1/RGS1/LRP6/TSC22D3/FAXDC2/GLIPR1/MPDZ/EP400/WNT9A/RORB/GP6/ZNF155/NRG2/SATB1/PCDHA9/CARMIL3/IL7/UNC13D/ITGAM/SLC2A3/RCBTB2/PIM1/MAP3K12…
Immortalized by tert up	Immortalized by tert up	147	0.3967438773727806	1.5479897905903455	0.003378218219353973	0.020128815168004594	0.01462036979451135	3499	tags=29%, list=19%, signal=24%	DKK1/MAPK4/EFEMP1/PIANP/ELN/CD36/COL8A1/CSPG4/LAMB1/BGN/LEFTY2/PGM5/TGFB2/SCN11A/TNC/ACTG2/FGF2/SLC38A11/PAPSS2/IGF2R/FZD7/FRMD4A/BMP4/COL6A2/ST3GAL5/POSTN/PPARG/CACNA2D1/COL4A6/LUM/TGFB1/LEPR/TSPAN5/DOCK2/PDE5A/RARRES1/MKX/VCAM1/CITED2/GRIA3/CLN8/SKAP2/CALD1
Diseases of metabolism	Diseases of metabolism	241	0.37819335525989245	1.5474129142531912	6.565535885260035e-4	0.005527065503408448	0.004014530456157453	2540	tags=23%, list=14%, signal=20%	MUC7/NCAN/OMD/ADAMTS16/ADAMTSL1/THBS2/OGN/HSPG2/ADAMTS5/ADAMTSL2/ADAMTS7/PAH/CSPG4/GPC6/ADAMTSL4/BGN/MUC17/ADAMTS4/CYP26B1/VCAN/CUBN/ADAMTS19/ADAMTS10/ADAMTS2/GPC2/DCN/CYP1B1/ADAMTS9/KERA/ACAN/PAPSS2/THBS1/THSD7A/NOTCH3/CYP19A1/CSF2RB/ADAMTS12/ADAMTSL3/LUM/NOTCH2/NOTCH1/CYP11B1/ADAMTS18/GPC1/CHST3/AGRN/CYP7B1/HYAL1/SI/FMOD/SFTA3/UGT1A1/GNS/MUC3A/SFTPA2/TCN2
Transformed by rhoa dn	Transformed by rhoa dn	397	0.3607315249282682	1.5467840790576954	3.848566590324329e-5	5.43227810228793e-4	3.945682546100357e-4	3900	tags=28%, list=21%, signal=23%	LTBP4/CACNA1G/AOC3/GHR/CCDC80/CXCL12/FN1/SFRP2/TCF7L1/THBS2/OGN/PDK4/COL5A1/PDGFRA/AEBP1/MMP14/DKK3/TIMP3/ELAVL2/CELF2/EN1/MRC2/SERPINE2/PDGFRB/COL1A1/PCOLCE/SMOC2/PLPP3/PER1/COL6A3/IGSF10/LOX/DCN/CAPN6/CYP1B1/IL11RA/LAMA4/ID3/FOXF1/RNASE4/EBF1/FZD1/CAV1/LAMA2/SNAI2/ITM2C/XDH/COL1A2/COL6A2/TWIST1/ST3GAL5/POSTN/MGP/COL4A5/SPARCL1/LUM/CDK14/MEIS3/FSCN1/PLD3/LRP6/TSPYL4/TCF4/RECK/GNS/POU6F1/ISLR/NAA…
Heparan sulfate heparin hs gag metabolism	Heparan sulfate heparin hs gag metabolism	55	0.4603382887430991	1.5461539098075392	0.008540931390063976	0.041162655305528165	0.029898095703488194	2435	tags=25%, list=13%, signal=22%	NCAN/HSPG2/XYLT1/CSPG4/GPC6/BGN/VCAN/GPC2/DCN/HS3ST3B1/GPC1/HS3ST4/AGRN/NDST1
Targets of ewsr1 fli1 fusion dn	Targets of ewsr1 fli1 fusion dn	338	0.3654831404661498	1.5460179517461772	1.1101223606355983e-4	0.001314793195860828	9.549872939043078e-4	5207	tags=38%, list=28%, signal=28%	ELAVL3/SIGLEC6/SFRP1/PRPH/ISL1/CAVIN2/CMA1/HMGA2/GAP43/HOXA9/CELF2/RHOBTB3/F13A1/FEV/JCAD/HLF/ANGPT1/PDE4B/PDGFD/GATA2/ITPR1/IGFBP4/SMIM36/ENPP2/TGM2/VIM/F5/RUNX3/SCG2/LATS2/GATA3/APC2/IGF2BP3/RNF144A/GJB2/SVIL/MYCT1/PDE3B/DOCK10/BAMBI/MLLT11/PLXNC1/NDST1/ATP8B4/SATB1/DOCK2/RERE/ADGRL2/DBH/PDE5A/DNMT3A/MAP4K4/IQGAP2/PTPRS/EPB41L2/CNN2/FYN/CHGB/LTBP1/WIPF1/TDRKH/CD34/CRMP1/PITPNM2/NISCH/SLC7A6/ARH…
Hex targets up	Hex targets up	78	0.4317240280741612	1.5438497174199846	0.007943570958106397	0.039013610654112636	0.02833715795099919	5346	tags=40%, list=28%, signal=29%	MAGEL2/SOX11/FBLN2/SFRP2/EFNA2/EPHA4/RTN1/BMP4/CIC/GRIK5/PGF/NDN/ISLR/SATB1/ZFHX3/AKAP12/TBX3/IGF1R/KLF7/NNAT/POU2F1/PCM1/GNG3/ENPP5/GLG1/PCGF2/ATXN2/SMARCC1/PTPN13/VEGFA/SP1
Senescence up	Senescence up	77	0.43238054726567654	1.542833878085466	0.005184916147978506	0.028177940922347322	0.020466774268336207	4221	tags=40%, list=22%, signal=31%	SERPINE1/FN1/CXCL14/NRG1/CCN2/ALDH1A3/FILIP1L/CDKN1C/IGFBP4/CYP1B1/IGFBP3/VIM/THBS1/COL1A2/IGFBP5/SPARC/IGSF3/NDN/RAB31/RHOB/TGFB1I1/HSPA2/CDKN2B/IGFBP1/CITED2/F3/TNFAIP3/MDM2/RBL2/IGFBP6/CCND1
Mef lcp with h3k27me3	Mef lcp with h3k27me3	68	0.4413134405373631	1.539709522762179	0.007553907382942866	0.03752915220532463	0.02725893594514733	2154	tags=32%, list=11%, signal=29%	ATP1A2/CDH7/SP7/FGF23/BTBD17/ADAMTSL2/CD207/PAX4/SP6/HDC/ANOS1/C16orf89/RD3/CNTNAP2/MYL2/MRGPRG/CLSTN3/OR6B2/SLC4A1/KCNIP3/FUT7/PPY
Small cell lung cancer	Small cell lung cancer	103	0.41335547501796277	1.539359551863295	0.004622862978289739	0.02588803267842254	0.01880352161077806	4495	tags=38%, list=24%, signal=29%	COL4A3/COL4A4/BIRC7/FN1/LAMA1/LAMB1/CDK6/CDKN1C/AKT3/LAMA4/LAMA2/BCL2/APAF1/COL4A6/COL4A5/CCNE1/PTGS2/NOS2/PIK3CD/AKT2/CDKN2B/PIK3R5/LAMB2/RB1/RARB/LAMC1/ITGB1/PIK3CB/LAMA5/RXRA/COL4A2/LAMB3/POLK/COL4A1/GADD45B/TRAF5/CCND1/ZBTB17/PIAS3
Hematopoietic stem cell up	Hematopoietic stem cell up	310	0.36561149786779107	1.5367574906536017	2.2805931920949675e-4	0.0024027844837777655	0.0017452392202987	4191	tags=31%, list=22%, signal=25%	NEGR1/CPA3/KIT/BEND4/HMGA2/COL24A1/BCAT1/COL5A1/PXDN/HOXA9/ZNF521/HOXA3/CYYR1/SV2A/MSRB3/SCN3A/HLF/DPPA4/CDK6/HOXA5/CRISPLD1/ANGPT1/GATA2/PLAGL1/AKT3/PRDM16/TMEM200A/NAP1L3/PAM/RUNX2/TFPI/FRMD6/TRO/ITM2C/PROM1/C1QTNF4/CYTL1/CTHRC1/CEP170/WDR17/MYCT1/SLC25A27/DST/ARMCX1/SLITRK4/CFH/KDM5B/PRDM11/FHL1/ZNF117/MICU3/DPYSL3/SHANK3/TMEM44/NDN/SCRN1/POGZ/ZMAT1/SCHIP1/SMIM24/ERG/PLEKHA5/IQGAP2/RHOBTB1/CHR…
Pax3foxo1 enhancers ko down	Pax3foxo1 enhancers ko down	436	0.3552271200106963	1.5366275528077669	5.45050585909498e-5	7.274872068926771e-4	5.284032814039448e-4	5007	tags=35%, list=27%, signal=26%	PAX3/EYA1/NELL1/MEDAG/SDK1/KANK4/TCF7L1/SEMA6A/TENM3/ALK/PXDN/PHLDB2/NAV1/NRG1/MN1/SULF2/CELF2/C3orf70/ALDH1A3/MDFI/BMERB1/CCND2/PKP1/NOS1/SERPINE2/PEG3/IL17RD/FOXK1/MAN1C1/PRKG1/VIM/CHST15/MCC/FOXF1/PROX1/RGS17/BCL2/N4BP3/WSCD1/ELAPOR2/BMP5/TSHZ3/CDK14/SORCS1/NOTCH2/PLCG1/ZNF483/DOCK10/FSCN1/ERRFI1/VIPR2/VANGL2/JAKMIP2/PGF/CDON/KIAA1614/PID1/PARM1/ZNF804A/GNAZ/KCNN3/APBB2/DPYSL3/EPHB2/CDH4/MAF/A…
Fcer1 pathway	Fcer1 pathway	70	0.43883493751291164	1.5364715773628403	0.010084522210239196	0.04655507027522611	0.033814824049613605	6274	tags=51%, list=33%, signal=34%	MS4A2/FCER1A/NFATC2/DUSP1/PLCG1/FER/S1PR1/RASA1/FYN/WIPF1/SPHK1/ITK/PXN/PLA2G1B/PLPP1/PLA2G4A/FOS/NFATC3/FCGR2B/JUN/NFATC1/PTPN11/NFATC4/IKBKB/CBLB/PTPN13/PIK3CG/RAF1/SHC1/PPP3CA/BTK/LAT2/PIK3CA/LCP2/VAV1/HCLS1
Heme signaling	Heme signaling	48	0.47098633707486387	1.5362079645367548	0.009595279590763449	0.04475893564187157	0.032510219068088715	4984	tags=46%, list=27%, signal=34%	APOB/HBB/MAFK/RAI1/CREBBP/HBA1/CRTC1/NCOA6/MEF2D/PPARA/TLR4/RXRA/MEF2C/ARNTL/SLC46A1/MED1/NCOR1/NCOA2/NCOA1/HMOX1/BACH1/HBA2
Ion transport by p type atpases	Ion transport by p type atpases	55	0.45736056422237725	1.5361525249072854	0.009106547973696836	0.04316185387349227	0.031350194205676904	3112	tags=27%, list=17%, signal=23%	ATP1A2/FXYD7/ATP1B2/CAMK2A/PLN/FXYD1/ATP8B2/ATP4A/ATP1A4/ATP8A2/CAMK2B/FXYD6/ATP8B4/ATP7B/ATP2A3
Head and neck cancer f	Head and neck cancer f	55	0.4570891095364682	1.535240780796015	0.009219671347509515	0.043523097862254535	0.03161258027548114	3738	tags=47%, list=20%, signal=38%	PLA2G2A/PTGIS/ACTC1/PDK4/MYH2/ABCA8/THBS4/DCLK1/MYH1/DES/CYP1B1/MYL2/APOD/KLHL41/FHL1/DDIT4L/KLHDC7B/IGF1/CHRDL1/CHGB/PKIA/ANK2/ZFPM2/CASQ2/TTN/NEXN
Adipogenesis 8	Adipogenesis 8	80	0.4283806603578331	1.5349362309367864	0.008486390417868639	0.04105341167404623	0.029818747650628138	4865	tags=40%, list=26%, signal=30%	PTGIS/FGF7/OGN/PHLDB2/SLC38A4/FXYD5/ACTA2/LOX/SERPINF1/PDPN/COL4A5/PLD3/SKI/RAB31/TUBA1A/USP22/F2R/TWIST2/CMTM3/EMP1/VCAM1/PLA2G7/TPBG/MATN4/PLXNB2/NCAM1/PLTP/APP/MYH9/KCTD10/EMP3/ZFP36L2
Aging cerebellum dn	Aging cerebellum dn	72	0.437186263927831	1.5310436203903717	0.009642855419851649	0.044918617651967176	0.032626202548370245	2629	tags=28%, list=14%, signal=24%	PTPRD/SLC6A15/ADRA2A/NPY1R/TNC/WNT8A/ZIC2/FABP7/THBS1/CCN1/ACHE/DPYSL2/SLC4A1/FSCN1/HGFAC/SNCA/RAB4B/NOS2/SMTNL2/LBX1
Stat5a targets up	Stat5a targets up	201	0.37910084580630143	1.5304755058321253	0.0016208629359554861	0.011346040551688403	0.008241086580837748	5334	tags=43%, list=28%, signal=31%	TUBB2B/CD1A/KLF2/SEMA6C/NTSR1/XIRP1/CCND2/CH25H/HSPA6/TMEFF2/CDKN1C/GATA2/IGFBP4/GNG2/TGM2/PRDM8/TLE4/ANTXR2/MAP1A/FGF11/IGFBP5/ST3GAL5/RNF144A/IL7R/TRIM46/EGR1/SYNE3/RGS1/CFH/P3H2/TNFAIP8L3/UPK1A/CST7/DAB2/PLVAP/TRIM58/IL18R1/PIM1/TSC22D2/COL6A1/SLC2A10/KLF6/HSPA2/CLEC4A/EMP1/PTGER2/SOCS2/SH3BP4/DUSP5/OLR1/VASN/ADGRG5/PLAU/EPB41/GNPTAB/PLXNA3/TLE3/CALB2/POU2F1/NOD1/GADD45B/MAOA/BTG2/TNFRSF4/FNDC…
Pseudopodia chemotaxis dn	Pseudopodia chemotaxis dn	420	0.35532158628163985	1.5288702323060384	6.122405853282765e-5	8.005744912718987e-4	5.814895219989376e-4	4901	tags=30%, list=26%, signal=23%	PI16/LTBP4/SERPINE1/FBLN2/FGF7/EMILIN1/COL16A1/LRP1/FN1/COL5A1/ADAMTS5/PDGFRA/SLC38A4/CSPG4/MMP14/ADAMTSL4/SNED1/TIMP3/ACKR3/PDGFRB/LOX/FOSB/SERPINF1/PNPLA7/ANGPTL2/FZD7/THBS1/AXL/ADRB2/DUSP1/SLCO2A1/FZD2/EPHB4/PKD1/TIMP2/ITGA5/AQP1/NPR2/IGSF3/COL4A6/COL4A5/CLCN6/PLD3/RUSC2/LRRC8C/GNS/KDM6B/ABCA2/SLC29A1/LIME1/MAPK8IP3/ZFP36/SUN2/EPB41L2/ABCA3/FGFR1/TXNIP/SLC2A10/KLF6/ZSWIM8/IGF1R/CLDN9/WLS/SERIN…
Notch1 targets up	Notch1 targets up	78	0.4254159822265636	1.52129207835892	0.010387711484949548	0.04752885397021321	0.034522122397864494	4886	tags=40%, list=26%, signal=30%	GATA3/CARD11/CNTN1/NOTCH3/COL4A6/ABCC8/EGR1/SLC4A3/DTX1/F2R/ANXA6/BRCA1/IL10RA/CD69/STAT5A/LAMB2/PTHLH/CX3CL1/CD28/EGR2/COL18A1/NFATC1/ID2/SLC12A3/TAGLN/RAG1/ZAP70/P2RY10/CD4/CCR7/CD74
Mir31 targets dn	Mir31 targets dn	393	0.3537187661365925	1.516661000512105	1.010330492460522e-4	0.0012133386240458298	8.812967490362302e-4	4595	tags=36%, list=24%, signal=28%	ADGRL3/LYVE1/PROKR1/NR4A3/FOXC2/CXCL12/KCNIP1/SV2B/PDK4/MYOM3/FLRT2/MMP16/SLIT3/SELE/TSLP/TIMP3/STUM/WNT10B/NACAD/PTGDS/CACNA1H/PLXNB3/ACKR3/SLC22A17/STMN2/SERPINE2/DISC1/RRAD/CDKN1C/PDGFD/PLXND1/ANGPT4/HTRA3/HRH2/CSF3R/NID1/CLDN5/HSPA12B/DEFA5/RASGRF2/ADAMTS9/PCDHGC5/PNPLA7/LATS2/BHLHE41/PCDHA13/RD3/EBF1/PROX1/CARD11/PDZD7/LAMA2/CCIN/VWF/BVES/PADI4/RASD1/AKR1C2/SVIL/CD93/SLC4A3/AFDN/DCAF12L2/LDB…
Covid19 combined cohort vs healthy donor platelets dn	Covid19 combined cohort vs healthy donor platelets dn	225	0.37141735143699944	1.5165366371038582	0.0011121654555198484	0.008413915457912275	0.006111365939211781	4279	tags=37%, list=23%, signal=29%	REG1B/CAVIN2/SDK1/CXCL12/AFF3/CPAMD8/PTPRD/NEURL1/IGF2/NR4A1/SLC18A3/TGFB2/APCDD1L/KIF26A/CAVIN1/CTNND2/LILRA4/ZC3H12B/ADAM12/CLEC10A/SASH1/LOXHD1/SMIM36/MAPK10/GPR55/PHACTR3/DMD/PAPPA/ENTHD1/TGFBI/KDR/IGFBP5/WDFY4/P2RY12/IL7R/ADORA2A/FAM189A1/ALDH1A2/IL33/MINAR1/ACVRL1/LDB2/PID1/DACH1/ZNF117/PF4V1/CDH5/DPYSL3/LEPR/MS4A7/WNT9A/STEAP1B/CPVL/OR11L1/CPXM2/ERV3-1/TMEM150C/TBX3/CEMIP/MPEG1/KCNAB1/SLC4…
Temporal response to progesterone cluster 16	Temporal response to progesterone cluster 16	78	0.42401074534931227	1.5162669363358312	0.01094319891722289	0.04936896744442411	0.03585867098417124	4176	tags=45%, list=22%, signal=35%	AOC3/NPTX2/ACTC1/FBN1/BGN/VCAN/COL3A1/CLVS1/COL1A1/PCOLCE/SMOC2/COL6A3/TFPI/TUBB4A/P3H3/COL1A2/IGFBP5/COL6A2/SPARC/SRPX/MFAP2/CNN1/DAB2/PYGM/PTGER3/ANXA6/TMEM45A/COL18A1/WDR6/COL4A2/FEZ1/COL4A1/MAOA/DBN1/DMPK
Targets of runx1 runx1t1 fusion hsc dn	Targets of runx1 runx1t1 fusion hsc dn	186	0.37772326058871264	1.5160567222117047	0.002417583224908578	0.015415085117238854	0.011196597660956221	5816	tags=45%, list=31%, signal=31%	CTSG/FCER1A/CD36/C11orf21/XYLT1/EGR3/ZBTB16/TIMP3/HDC/HBD/SLC16A7/GATA2/MMP2/IGFBP4/CYP1B1/CLC/RUNX3/TGFBI/STAB1/CSF2RB/IGFBP5/IL7R/HBB/GPR183/ADGRE2/ADCY7/ANK1/FUT7/RASSF2/CST7/HBA1/PLXNC1/IL7/ARHGEF10/TPCN1/SLA/IL10RA/S100B/DYRK2/IL9R/APOBR/PLPP1/CYBB/PIK3CB/MYCN/MICAL2/SELPLG/TMEM156/PMP22/ID2/CCND1/BIN2/STK10/CHST12/CCND3/FCGR2A/LDLRAD4/CCR7/CKAP4/LAPTM5/SASH3/ZFP36L2/ALOX5AP/FPR2/GPR35/CD33/…
Plasma cell vs plasmablast up	Plasma cell vs plasmablast up	378	0.35402260885783493	1.5122892049706027	1.5619840731218935e-4	0.0017343409363629301	0.0012597217286634147	4216	tags=33%, list=22%, signal=26%	ELAVL3/HTR1E/TNXB/ADH4/SLC18A1/CPA3/CES1/CYP1A2/GABRA1/ADRB3/LRP1/CXCL12/ACTC1/COL14A1/FBN1/MAG/FCGR3B/CD22/MMP16/NR4A1/AEBP1/DDR2/TIMP3/WNT10B/PCDHGC3/COL11A1/PTGDS/CSN2/FEV/TNC/FSTL1/CEACAM4/CYP2A6/COL1A1/MME/GPX3/PCOLCE/HBD/PLPP3/TGFB3/DPP6/RGS2/MMP9/IGFBP4/CNTNAP1/RBP3/DEFA5/PALM/PAM/FOSB/ADCYAP1/DMD/DUSP1/BMP4/NELL2/MYL2/GNB3/ELANE/IL7R/EGR1/AVPR1B/NBL1/PSG7/MPO/FSCN1/GPC1/GNG4/TSC22D3/ITGA8…
Pubertal breast 5 6wk dn	Pubertal breast 5 6wk dn	125	0.39582055822683354	1.510333064571513	0.006808827427413602	0.03456066887294077	0.0251028068493185	7400	tags=56%, list=39%, signal=34%	LALBA/PRRX1/CSPG4/GPD1/CCND2/CAVIN1/EHD2/SLC2A4/ZEB2/CYGB/FSCN1/KCNB1/DPYSL3/NDST1/TAOK1/ZFHX3/DNMT3A/ZBTB20/AKT2/RUNX1/FIGN/TPR/STAT5B/CALD1/ITSN2/NFATC3/FTO/QKI/MEF2C/TNS1/CRIM1/LASP1/KIAA0100/WNK1/KDM5A/IL6ST/LPGAT1/SNTB2/SOX9/RGS5/BRD4/ARHGEF2/NFIX/SECISBP2L/DHX36/ACLY/PCYT1A/MBTPS1/EIF4EBP2/CUX1/GBP7/SREK1/SRPK2/ACACA/NFIB/MAPK14/EIF4G1/PPP2R5B/AKAP9/CPD/SIRPA/PURB/HDLBP/ATXN7L3B/MAP4K2/DAPK…
Integrinmediated cell adhesion	Integrinmediated cell adhesion	101	0.40700183559415654	1.5042129750059021	0.005672885165742304	0.030286740283838706	0.02199848024457474	5673	tags=46%, list=30%, signal=32%	MAPK4/RHO/ITGA11/CAPN6/AKT3/MAPK10/ITGA10/CAV1/ITGA5/ITGA7/ITGA8/ITGAM/PAK3/AKT2/DOCK1/MAPK7/FYN/GIT2/PXN/TLN1/ITGA4/ITGB1/ROCK2/VAV2/SELENOP/TNS1/ITGAX/CAPN10/PAK4/ITGB2/ITGB5/RAPGEF1/SRC/MAP2K6/CAV2/ITGB8/ITGA2/PDPK1/SORBS1/RAF1/SHC1/RAP1B/ILK/ARHGEF7/ITGAL/ITGA1
Rac1 gtpase cycle	Rac1 gtpase cycle	183	0.37615021883465355	1.5041544794380135	0.0030537052747558542	0.018519466501396256	0.013451434989470353	6777	tags=54%, list=36%, signal=35%	PLEKHG2/DOCK11/ARHGAP31/DLC1/PREX1/RASGRF2/ARHGAP24/GARRE1/CAV1/DOCK3/TIAM2/ARHGEF15/DOCK10/ARAP3/ARHGEF6/MCF2/SRGAP2/FARP1/PLEKHG6/DOCK2/DOCK4/MYO9B/IQGAP2/PAK3/DOCK1/ARHGEF10/PLEKHG4/CHN2/MCF2L/WIPF1/ABL2/PLD1/GIT2/CDC42BPA/ARHGAP33/NISCH/ARHGAP30/WASF3/CYBB/DOCK6/ITGB1/ARHGEF25/ARHGAP35/PLEKHG1/WASF2/DOCK8/NCKAP1L/WASF1/VAV2/ABR/LEMD3/ARHGAP45/SRGAP1/EPHA2/CIT/ARHGAP25/BCR/ARHGAP5/ARHGAP21/LBR…
Methionine deprivation 96hr up	Methionine deprivation 96hr up	117	0.3972179942124945	1.5020008845120225	0.007712792424683825	0.038098088755485204	0.027672177493819446	5647	tags=45%, list=30%, signal=32%	FGF7/GSTM5/PDGFRA/EGR3/BGN/TIMP3/TGFB2/PDGFRB/GPX3/PDGFD/DCN/MMP2/IGFBP4/FGF2/BMP2/IGFBP3/IGF2R/IL6/FZD1/CAV1/TIMP2/IGFBP5/APAF1/CCNE1/LUM/BHMT/CREBBP/RHOB/FGFR1/BRCA1/HGF/GJA1/RNASEL/ABL1/JUN/WNT5A/BTG2/IGFBP6/PLAUR/MTR/PRKACB/GTF2H4/CHRNB1/IL6ST/SKIL/IL1R1/SHC1/CDKN1B/SPTAN1/SMAD5/DPYD/DVL3/PLAT
Sensory perception	Sensory perception	258	0.3641056833906121	1.5015787255479274	0.0010193156883450353	0.007837665671663817	0.0056928124923923	4098	tags=37%, list=22%, signal=29%	OR3A1/CNGA2/APOB/OR56A4/LRP1/TAS1R2/OR11H4/TAS2R13/GNAT3/HSPG2/OTOG/USH1G/GPC6/CACNA2D2/OR1E1/RHO/AWAT2/RDH16/SDR9C7/RBP4/SCN3A/RPE65/CALHM1/GPC2/SCNN1G/BSN/OR52B6/RBP3/OR1C1/EPB41L3/GRM1/LRP2/LPL/SCN2A/OR2B11/GNB3/KCNN2/OR51E2/ITPR3/TAS2R38/USH1C/TAS2R31/OR51E1/SCNN1B/RLBP1/TAS2R43/TAS1R3/TAS2R46/RDH10/DHRS9/OR2S2/PPEF1/GPC1/CACNB2/AGRN/EPS8/TAS2R40/TAS2R3/AKR1C1/GRK7/TAS2R50/CDH23/OR1D2/SPTBN1/…
Ras signaling	Ras signaling	184	0.37533830732387685	1.5010385244992586	0.0024560593505039397	0.01558327312043879	0.011318759386882949	4579	tags=36%, list=24%, signal=28%	PLA2G2A/NGFR/NTRK2/GRIN2B/KIT/PLA2G5/PDGFRA/HTR7/CALML5/KRAS/PDGFRB/PLA2G4F/AKT3/RASGRF2/GNG2/MAPK10/KSR1/KDR/GNB3/CSF1R/PLCG1/EGFR/TTBK1/AFDN/TEK/FGFR3/GNG4/SHC2/PLA2G2E/MRAS/SYNGAP1/PIK3CD/PLCG2/GNG11/PAK3/AKT2/FGFR1/RASA3/RASA1/IGF1R/ABL2/JMJD7-PLA2G4B/KSR2/NF1/PLD1/PLA2G12B/PLA2G1B/RAPGEF5/GAB1/STK4/REL/SHC4/PLA2G4A/PIK3CB/FLT1/ABL1/GNGT1/RASAL2/GNG3/EPHA2/PTPN11/PLCE1/RASA4B/ZAP70/PRKACB/PAK…
Esr1 targets up	Esr1 targets up	168	0.37886523726646515	1.4988507600831242	0.002606385891368577	0.01631603901862808	0.011850996794545364	3888	tags=35%, list=21%, signal=28%	SERPINE1/SORCS2/CXCL12/CRISPLD2/GPAT2/CLMP/LAMB1/ADAMTSL4/CYP26A1/VTN/GATA2/FRY/CSF3R/IGFBP4/PALM/IGFBP3/ACACB/THBS1/THSD7A/WNT4/XDH/IGF2BP3/PTGER4/RNF144A/PPARG/CLSTN3/CEP170/NT5E/COL21A1/NPTX1/DOCK10/DST/FHL1/PKDCC/FSD1/AGXT/COL12A1/CYRIA/PIM1/FYN/PLD1/S100A12/CYP4F8/LAMC1/HTR2C/MEGF6/OBSL1/FOS/ECM1/CDC42EP3/CACNA1D/PECAM1/TH/PLCL2/MICAL2/TCF7L2/SEPTIN6/PARVA/GAS1
Diabetic nephropathy dn	Diabetic nephropathy dn	431	0.3458830352670142	1.4972138977924652	1.39404348884641e-4	0.0015784861658322427	0.0011465181267435484	4741	tags=32%, list=25%, signal=24%	SERPINE1/NTRK2/COL4A3/COL4A4/GHR/SPOCK1/CLIP3/PTH1R/FLRT2/ECM2/PTPRD/HOXA9/PNMA2/CCN2/PTGDS/VCAN/NEBL/COL3A1/MXRA8/MME/FGF1/CDKN1C/PDE4B/LOX/FRY/GRK5/DPP6/CYP1B1/NEDD9/PAM/BMP2/IRS1/VIM/TLE4/LPL/AXL/DUSP1/THSD7A/GRIK2/HTRA1/PTGER4/POSTN/COL4A6/CCN1/APOD/PHYHIP/PTPRO/DST/CORO2B/CACNB2/TSPYL4/TSC22D3/AGRN/CR1/DPYSL3/SPOCK2/PLA2R1/NDN/SRGAP2/SCRN1/SULF1/PLCG2/RAI14/GULP1/SCHIP1/PALLD/SLC2A3/IQGAP2/Z…
Gr targets up	Gr targets up	77	0.4192147007606336	1.495855090186453	0.008215552227181733	0.0400440161536805	0.029085582998188576	4450	tags=39%, list=24%, signal=30%	GALNT15/NTRK2/OLIG1/SEMA6A/SCRG1/PDGFRA/ZBTB16/SULF2/ENPP1/EDNRA/SCNN1G/TGFB3/ITPR1/FZD1/RECK/DDIT4L/SPOCK2/GULP1/IQGAP2/NDRG2/LY6H/MEGF6/TESPA1/RAB11FIP5/PARVA/ABCG2/TTC28/TRIB2/MGAT4A/NR3C1
Irs1 targets dn	Irs1 targets dn	133	0.3896678801634942	1.4951752334852275	0.005761190776281997	0.030628220340590047	0.0222465109739289	4105	tags=33%, list=22%, signal=26%	FABP4/PAX3/TNXB/AOC3/ACTC1/SFRP2/RAB3B/MMP14/DKK3/COL3A1/ENPP1/PLPP3/COL6A3/HTRA3/ITPR1/IGFBP4/CAPN6/THBD/TGFBI/FRMD6/SNAI2/CCDC88A/PRL/SPARCL1/PPL/DAB2/ZFR2/H6PD/ZFHX3/COL6A1/TMEM45A/LY6H/SIX1/HGF/GJA1/SEMA3E/RAMP2/PIP5K1B/ADARB1/COL4A2/CTDSP2/TLE3/COL4A1/MAOA
Induced t to natural killer dn	Induced t to natural killer dn	135	0.38840927239844286	1.4943457340277138	0.006706440989036129	0.03425089963784534	0.024877808967910302	4718	tags=39%, list=25%, signal=30%	CXCL12/COL5A1/NAV1/PLEKHG2/BGN/CELF2/ART4/TSPAN32/ACTA2/LOX/BCL11B/MMP2/OLFML3/TMEM108/NOTCH3/LLGL1/ACVR2B/DTX1/SLC5A9/POU6F1/CTSE/SATB1/SLC29A1/ITPR2/COL6A1/TXNIP/TPCN1/IGF1R/SLA/MARCKS/PLD4/PITPNM2/NISCH/IGIP/GPR83/ALDH2/KLHL24/STK4/PARD6G/SETD1B/FAM78A/CD6/TBXA2R/CCL23/N4BP2L1/FYB1/TRIB2/ZNF260/ETS1/MIB2/SH2D1A/CD27/PRELP
Cancer copy number up	Cancer copy number up	320	0.35385321880071396	1.4938118839190428	5.536575358644029e-4	0.004802093644399669	0.00348795417330844	4671	tags=31%, list=25%, signal=24%	PAX3/OMD/MYH11/HOXD13/NR4A3/KIT/AFF3/TAL1/HMGA2/ALK/PRRX1/PDGFRA/HOXA9/HOXC13/ZBTB16/MN1/FEV/OLIG2/KRAS/CCND2/HLF/ACKR3/PDGFRB/CDK6/LHFPL6/COL1A1/PER1/BCL11B/PRDM16/CDH11/ACSL6/FOXO1/TET1/BCL2/GAS7/HOXD11/PPARG/CALCR/EGFR/AFDN/FSTL3/NOTCH1/FGFR3/FLI1/MLLT11/CREBBP/ETV1/MAF/IKZF1/SUFU/ERG/PIM1/AKT2/MAFB/RUNX1/FGFR1/KLF6/LMO1/TPR/ABL2/BRCA1/NF1/ITK/FOXO3/RB1/RET/TMPRSS2/ERC1/AFF1/APC/REL/MLLT1/ARNT…
Immortalized by hpv31 up	Immortalized by hpv31 up	68	0.4275047843489274	1.4915321561177493	0.010531314526829358	0.048015338444446776	0.034875475680371096	3743	tags=31%, list=20%, signal=25%	SLC18A1/TMEM119/CRH/C11orf96/BHLHE41/FZD7/SLC9A9/WDR81/SGIP1/FMOD/SNAI1/SUFU/EDIL3/TAOK1/SLC2A2/LTBP1/ABL2/S100A12/APC/MS4A4A/MANEA
Pubertal breast 4 5wk dn	Pubertal breast 4 5wk dn	194	0.37099444049933783	1.4904153405760587	0.0021027695048149277	0.013853540267015994	0.01006238469459829	4942	tags=36%, list=26%, signal=26%	CIDEA/FABP4/ALDH1L1/ADRB3/LGALS12/SLC7A10/PDK4/HSPG2/CSPG4/ZBTB16/GPD1/TPSAB1/NRK/CAVIN1/EDNRA/NID1/IGFBP4/EHD2/SLC2A4/LAMA4/NID2/LPL/CCN1/ACVR1C/KCNK2/FSCN1/TIE1/FHL1/KCNB1/CDH5/KLF15/MPZ/SH2B3/NDN/COX7A1/KCNK3/AKT2/CHRDL1/EPAS1/EPB41L2/ATP6V0A1/BCHE/NOTCH4/BMP1/PLIN5/CD8A/ANXA8L1/AATK/SOD3/GPAM/QKI/NNAT/TNS1/SLC16A2/DMPK/ZNF106/PER3/PTPN14/COQ8A/PRKACB/LASP1/ETS1/EXTL3/APOC2/PRELP/HLA-DQA1/GALN…
Aml by npm1 localization up	Aml by npm1 localization up	139	0.3833524758906264	1.4855957317382582	0.005637626362849675	0.03015936705929572	0.021905963937519677	4131	tags=28%, list=22%, signal=22%	CPA3/PIEZO2/CAVIN2/HOXA2/HOXA4/HOXA10/HOXA1/HOXA9/SNCAIP/HOXA6/F13A1/HOXA7/HOXA5/PDGFD/GATA2/MMP2/EPB41L3/FZD7/ITGA5/COL4A5/LUM/CFH/DPYSL3/AGXT/SCHIP1/LTBP1/PTX3/LAMB2/ACVR1B/TLR4/H2BC6/FTO/CHD7/SELENOP/DLG5/PBX3/C3AR1/ARHGAP25/HOXB3
Nrg1 signaling up	Nrg1 signaling up	172	0.3715124402669838	1.4813715161274608	0.006047348834524406	0.03156630313624088	0.022927878319985353	4447	tags=32%, list=24%, signal=25%	NR4A3/KLF2/NR4A1/LRRC15/EGR3/CCN2/TGFB2/GEM/TNRC18/CGA/GATA2/PER1/LYPD3/RGS2/NEDD9/FOSB/ID3/ID1/DUSP1/SNAI2/ZNF365/IRS2/CCN1/EGR1/DST/FLRT3/SPRED2/HIC2/KDM6B/ITPKC/PALLD/ZFP36/KLF6/TUBB2A/EGR4/SPHK1/SIK1/DUSP5/SGK1/ARC/REL/ZNF331/FOS/EPPK1/CDC42EP3/JUN/PPP1R15A/KBTBD2/GADD45B/EPHA2/PLAUR/TIPARP/FBXO41/NAB2/DUSP8
Circulating endotheliocytes in cancer up	Circulating endotheliocytes in cancer up	159	0.3753244666534456	1.4809262228289595	0.0037815915128492	0.021964779565049695	0.01595390473883452	5425	tags=45%, list=29%, signal=32%	SERPINB13/APOB/KIT/KCNJ15/BCAT1/NRG1/DKK3/EPHA4/HSPA6/MARCO/CYP1B1/IGFBP3/THBD/THBS1/TGFBI/IRAK3/TIMP2/SPARC/C5AR1/TLR8/TNFRSF1B/EGR1/TGFB1/CD93/NBL1/ADGRE2/RGS1/KDM5B/TIE1/DSE/CXCR1/ENG/FPR1/RGS16/SLC2A3/ULK1/MYLK/EPAS1/MAPK7/SLA/SPHK1/CLN8/CDA/LRRC17/PPARD/PLAU/RAB33A/PMP22/WNT5A/TNS1/C3AR1/TLR2/B4GALT5/PROS1/FCGR2A/CD14/HMOX1/HCK/CYP27A1/P2RX1/IL21R/PLIN2/ABCA1/PDLIM7/MCAM/ADM/VEGFA/GNA15/SHC1…
Mmp14 targets up	Mmp14 targets up	265	0.3580050133226106	1.4780103109244842	0.0011213089218737283	0.008433552650355398	0.006125629223605231	4213	tags=34%, list=22%, signal=27%	TMEM59L/EFEMP1/SHISAL1/FN1/RGS4/COL5A1/PXDN/CSPG4/MMP14/BOC/LAMB1/CCN2/TIMP3/SULF2/LRRN4CL/WDR86/ENPP1/CCND2/PCOLCE/HEG1/PLXND1/HTRA3/ANKRD1/PNPLA7/LAMA4/TRIML2/GPR55/ANGPTL2/CGNL1/CHST15/ALPK2/SLCO2A1/FRMD6/MIA/COLEC12/TTYH2/MAGED4B/COL6A2/CYTL1/PPARG/ADORA2A/LOXL3/GJB2/KIF1B/ERRFI1/VANGL2/FLI1/GLIPR1/SRPX2/CST7/TMEM44/NKD2/PIK3CD/FST/MEGF10/FKBP7/DAAM2/MYLK/HSD17B6/COL6A1/TXNIP/ANXA6/C1QTNF6/TM…
Aging brain dn	Aging brain dn	152	0.3766502621316955	1.4770096820056264	0.00664431884527475	0.03402736649190408	0.024715447833997845	3955	tags=30%, list=21%, signal=24%	CRH/CAMK2A/CDH22/RGS4/PENK/ELAVL2/GFRA2/RBP4/FOXG1/HTR2A/MEGF8/GRIA1/SYN2/MAPT/NRXN1/CNTN1/DYNC1I1/KIF1B/PTPRO/PLD3/CACNB2/PARM1/MAP2/KCNB1/EP400/CYRIA/MAP1B/KCNJ9/FGF12/TSPYL2/TPPP/CDK5R1/CHGB/CAP2/ANK2/CBX5/SLC17A7/PIK3CB/INPP4A/MBNL2/CAMK4/TPBG/MTOR/CALB2/MEF2C/FGF13
Neoplastic transformation by stat3 up	Neoplastic transformation by stat3 up	122	0.38747005520372857	1.4729656351635196	0.007185170117706355	0.036079918563765245	0.026206299136602128	2599	tags=26%, list=14%, signal=23%	CUX2/SFRP1/FN1/SPOCK1/COL5A1/CPS1/XYLT1/IGF2/MMP3/ELAVL2/COL5A2/IL13RA2/CCND2/TNC/SERPINE2/GPX3/GREM1/TP63/NEFL/CDH11/THBS1/PDPN/MAN1A1/CFH/FLI1/PID1/PTGS2/DPYSL3/FST/MAP1B/GNG11/PALLD
Stem cell dn	Stem cell dn	216	0.3612285404678688	1.4721094068754568	0.001623758077378834	0.011350884144716081	0.00824460467768586	3950	tags=34%, list=21%, signal=27%	CCL14/CAVIN2/SELP/JAM2/SEMA6A/SELE/JCAD/KIF25/ACKR1/MCTP1/GATA2/KANK3/CLDN5/NEDD9/ADAMTS9/KL/GARRE1/TGM2/THBD/ADRB2/THSD7A/KDR/EPHB4/VWF/CSF2RB/ABLIM3/PTPRB/AQP1/APLNR/TNFRSF1B/ALDH1A2/CD93/MYCT1/ARHGEF15/EMCN/ZNF385D/TEK/ARAP3/RPS6KA2/TIE1/FLI1/APOLD1/CDH5/SH2B3/CLEC1A/ENG/PLVAP/IL18R1/GNG11/SCHIP1/ADGRL4/ERG/S1PR1/MCF2L/SSH1/PDE2A/NOTCH4/SOCS2/RAPGEF5/STX11/CX3CL1/GIPC2/GIMAP6/SCUBE2/CDC42EP3/D…
Hematopoietic stem cell in collagen gel up	Hematopoietic stem cell in collagen gel up	218	0.36111145169750425	1.4720309618632748	0.003316230184529971	0.01988965996588872	0.01444666173151651	4935	tags=34%, list=26%, signal=26%	COL2A1/EPB42/FLNC/TAC3/KLF2/FBN1/EGR3/RHOBTB3/PDE4B/RGS2/CYP1B1/FOSB/FZD7/DUSP1/IL6/PROX1/ACSL6/PTGER4/KLF4/GPR183/SLCO2B1/EGR1/DDX3Y/DHRS9/RGS1/TCF4/PTGS2/AKR1C1/DAB2/RAB11FIP1/CRISP2/ZFP36/RUNX1/KLF6/CDK5R1/AKAP13/IL12A/NF1/SPRY2/PTX3/HGF/PLK2/KLF9/F3/SGK1/FOS/CDC42EP3/AGAP1/RASSF4/JUN/PALM2AKAP2/PPP1R15A/TNFAIP3/MTOR/SEPTIN8/NREP/ABCG2/HIPK1/GADD45B/C3AR1/COL15A1/BTG2/EDEM3/DSTYK/TIPARP/ADD1/H…
Vegfa targets	Vegfa targets	110	0.3940186469429713	1.4711012419197615	0.006333907522541757	0.032829267159089674	0.023845219996437517	3224	tags=35%, list=17%, signal=30%	BPI/ISL1/EFEMP1/ELN/NR4A1/EGR3/BGN/ART4/VCAN/BMP6/GEM/PLPP3/PDE4B/ROR2/COL6A3/FAP/MMP2/ANKRD1/NID2/THBD/PVALB/BMP4/KDR/FOXO1/VWF/COL1A2/POSTN/MGP/PGF/TIE1/PPY/PTGS2/AQP7/PIM1/COL6A1/ESR1/ADD2/CD34/C1S
Targets of nup98 hoxa9 fusion 10d dn	Targets of nup98 hoxa9 fusion 10d dn	142	0.3791875982494764	1.4693948976104003	0.00528098761854489	0.028579462406242935	0.020758415506332468	4226	tags=39%, list=23%, signal=30%	BPI/OLIG1/MS4A2/KCNJ15/LGALS12/KLF2/FCER1A/PDK4/MMP8/F13A1/C9/CCL18/PLPP3/RTN1/OLFML2B/MMP9/ATP6V0D2/SERPINF1/ID3/TGFBI/FRMD4A/STAB1/PADI4/IL7R/C5AR1/PADI2/SLCO2B1/SRPX/GSDME/RPS6KA2/PID1/DACH1/CST7/MAF/DAB2/DOCK4/MEIKIN/TEX15/PTGER3/RARRES1/S100B/EMP1/RAPH1/SGK1/SLC16A10/CEACAM6/ADTRP/PLA2G7/CLEC5A/RASSF4/SELENOP/MAOA/SLAMF8/CCL23/CEACAM8
Neuroinflammation and glutamatergic signaling	Neuroinflammation and glutamatergic signaling	141	0.37704522321652045	1.4608512348338807	0.008399208298057995	0.04074644176233031	0.029595783030623626	4266	tags=33%, list=23%, signal=25%	GFAP/GRIN2C/GRIN2B/SLC7A10/CAMK2A/SLC17A6/ADCY1/SLC1A6/TGFB2/NOS1/DISC1/NGF/TGFB3/GRM2/FGF2/GRIA1/GRM1/IRS1/IL6/GRIK2/BCL2/GRIK1/GRIA4/TNFRSF1B/TGFB1/GRIK5/LRRC8C/CAMK2B/GRIN2D/IGF1/SLC2A3/IL12A/IL10RA/GRIA3/SLC17A7/ARC/PLCB2/FOS/GRIA2/CAMK4/TGFBR2/GRM7/GRIK4/TRAF5/SLC38A3/TGFBR3
Neocortex basal radial glia up	Neocortex basal radial glia up	359	0.3421301020942431	1.4596767675993938	8.615344596727066e-4	0.006818165186227011	0.004952308196517863	4579	tags=40%, list=24%, signal=31%	FOXP2/CUX2/PAX3/OR3A1/SLC16A12/ADRA1A/BMPER/KCNJ15/PIWIL3/ITGBL1/KANK4/CRB1/SLC17A6/ASPA/CD22/COL8A1/SHE/KCNE4/TTC6/SELE/PENK/SULT1B1/LRRC38/ABCA9/ADAMTS4/SLC36A2/OLFML1/GADL1/SCN11A/NEBL/MSRB3/CXXC4/DPPA4/C7/SHROOM4/PLXNA4/TSBP1/SASH1/SAMD5/ZNF221/SLC38A11/ARHGAP24/ADAMTS9/ACAN/PDE7B/NFATC2/CGNL1/GDF5/THBS1/LGSN/EBF1/ARHGAP28/PCDH11Y/ACSL6/ACOT11/BVES/HRK/ACVR1C/PDE3A/CALCR/EOMES/AGMO/GCNT3/IL1R…
Cdc42 gtpase cycle	Cdc42 gtpase cycle	155	0.371193977876177	1.459404795359581	0.007265687472821801	0.036413250836554396	0.02644841180204946	5819	tags=46%, list=31%, signal=32%	PLEKHG2/DOCK11/ARHGAP31/DLC1/SH3PXD2A/PREX1/RASGRF2/ARHGAP24/ARHGAP40/STARD8/CAV1/SHKBP1/SYDE1/ARHGEF15/DOCK10/ARAP3/ARHGEF6/WDR81/FGD4/MCF2/SRGAP2/FARP1/FMNL3/MYO9B/IQGAP2/PAK3/ARHGEF10/PLEKHG4/MCF2L/WIPF1/PLD1/GIT2/CDC42BPA/ARHGAP33/ARHGAP30/DOCK6/ARHGEF25/STARD13/ARHGAP35/PLEKHG1/CDC42EP3/DOCK8/FNBP1L/VAV2/ABR/ARHGAP45/SRGAP1/BCR/ARHGAP5/ARHGAP21/LBR/PAK4/JUP/FMNL1/DAAM1/TRIO/FMNL2/ARHGAP42/PL…
Glioblastoma mesenchymal	Glioblastoma mesenchymal	216	0.35789317568813955	1.4585168433940638	0.0019124212991121607	0.01291323005639037	0.009379399487264581	6814	tags=53%, list=36%, signal=34%	SERPINE1/COL5A1/FXYD5/LAMB1/COL8A2/MRC2/CAVIN1/COL1A1/ADAM12/LOX/EHD2/RUNX2/THBD/THBS1/TGFBI/PDPN/STAB1/ITGA5/COL1A2/PTGER4/CYBRD1/C5AR1/MAN1A1/TNFRSF1B/DSE/SRPX2/SH2B3/ENG/BDKRB2/DAB2/RAB11FIP1/LTBP2/ITGAM/MAFB/CNN2/LTBP1/WIPF1/MYO1F/PTPRC/ITGA4/MS4A4A/TLR4/PLAU/FCGR2B/TNFAIP3/COPZ2/TGFBR2/FOLR2/LILRB2/TGOLN2/TLR2/SLAMF8/THEMIS2/IGFBP6/PLAUR/FNDC3B/CCR5/CYTH4/FCGR2A/LAIR1/ITGB2/PLBD1/PLS3/CD4/MY…
Hoxa1 targets dn	Hoxa1 targets dn	160	0.3699283382158447	1.458222330940617	0.007770263620854144	0.03827189118034469	0.027798417200499633	4110	tags=42%, list=22%, signal=33%	ASPN/TRIL/GPR50/SPOCK1/SLITRK3/RBMXL2/PHLDB2/RAB3B/GPC6/DKK3/MMP3/LEFTY2/CALML5/EPHA4/TNC/CD1C/INHBA/MATN3/CGNL1/SLCO2A1/NELL2/CYP19A1/FGF11/GASK1B/IGSF3/APOD/CALCR/MFAP2/ZNF853/CDK14/PTCH2/FOXN1/FAXDC2/SHC2/PLA2G2E/MAF/AKR1C1/MAP1B/FGF12/MAFB/SPINK5/TXNIP/KLF6/RNF39/PKIA/SLC8A1/WLS/PLD1/PDE8B/AAK1/PLPP1/SGK1/CEACAM6/BMP7/SCUBE2/ABHD2/MYCN/FXYD3/NYNRIN/KIF5C/NPPB/LAMB3/TYRP1/FGF13/UNC5B/SEMA5A/TN…
Transmission across chemical synapses	Transmission across chemical synapses	269	0.35278547523500126	1.4567054852045058	0.00170182203373758	0.011795821758680476	0.00856778080093762	4136	tags=35%, list=22%, signal=27%	SLC1A7/TUBB2B/GRIN2C/GRIN2B/GABRA1/CHRND/GABRQ/GABRA4/KCNJ15/PRKAG3/CACNB4/CAMK2A/GNAT3/ADCY1/SLC1A6/GABRG2/NRG1/SYT1/CACNA2D2/ADCY5/SLC18A3/KRAS/KCNJ10/KCNJ6/GABRA3/SLC6A1/LIN7A/ADCY2/NEFL/RASGRF2/GNG2/GRIA1/SYN2/MAPT/HTR3E/TUBB4A/GRIK2/GNB3/CHRNG/GRIK1/ACHE/GRIA4/NBEA/GRIK5/ADCY7/RPS6KA2/GNG4/CACNB2/PPFIA2/GABBR1/CHAT/ADCY6/CAMK2B/SLC6A4/CACNG4/TUBA1A/GRIN2D/GNG11/KCNJ4/KCNJ9/ADCY9/DLG4/CACNB3/…
Mir21 targets	Mir21 targets	286	0.3489396519256907	1.456199087785991	0.002994829994074249	0.01828123712022575	0.01327839938754547	7099	tags=50%, list=38%, signal=32%	PTGFR/HOXA9/DDR2/TIMP3/COL5A2/RHOBTB3/TGFB2/EPHA4/FILIP1L/SASH1/SAMD5/OSR1/DMD/PRICKLE2/TET1/CYBRD1/APAF1/NBEA/DOCK10/MPDZ/APOLD1/RECK/USP34/SCRN1/RAI14/PALLD/LATS1/ZBTB20/FIGN/LPIN1/UTRN/REV3L/PLD1/VASH2/RNF38/PBRM1/GNE/ZNF532/RAPH1/PLPP1/PPARA/OLR1/KLHL24/DYNC1LI2/DDHD2/NFAT5/APC/CALD1/ITSN2/ETNK1/TLR4/PKD2/GPAM/CEP97/SLC17A5/PHACTR2/PPP1R3B/TGFBR2/PBX1/WNT5A/TNRC6B/FOXN3/SEC63/KLHL3/WNK3/PER3/…
Rhoa gtpase cycle	Rhoa gtpase cycle	149	0.37219097465874473	1.456122397554279	0.0063531085818461	0.03282970452725287	0.023845537674563575	6243	tags=46%, list=33%, signal=31%	ACTC1/ARHGAP6/ARHGAP31/CAVIN1/DLC1/PREX1/RASGRF2/ARHGAP24/ARHGAP40/STARD8/OBSCN/ARHGAP28/CAV1/ARHGEF40/ARHGEF15/ARAP3/MCF2/FARP1/PLEKHG6/DOCK2/FMNL3/MYO9B/ARHGEF10L/ARHGEF10/PLEKHG4/MCF2L/AKAP13/PLD1/ARHGAP30/ARHGEF25/STARD13/ARHGAP35/ROCK2/ARHGEF17/VAV2/ABR/ARHGAP19/ARHGAP45/SRGAP1/CIT/BCR/ARHGAP5/STK10/ARHGEF1/ARHGAP21/LBR/ERBIN/SLK/JUP/DAAM1/TRIO/ARHGAP42/PLEKHG3/MCAM/KALRN/ARHGAP1/ARHGAP22/AR…
Hcmv infection 24hr dn	Hcmv infection 24hr dn	143	0.37440492188429075	1.4516938040514653	0.010845612113953419	0.04905758877180686	0.03563250410341889	2410	tags=24%, list=13%, signal=21%	FBN2/PDE1C/KIT/FBN1/COL8A1/CPS1/HOXA9/ABCA8/TIMP3/COL5A2/OLFML1/ACTA2/PDGFRB/FGF1/ANGPT1/COL6A3/COL13A1/GPR176/IGFBP3/LAMA4/PRKG1/THBS1/CAV1/GRIK2/N4BP3/IGFBP5/CROCC/DST/RPS6KA2/CDON/MYH8/RECK/TEAD1/MXRA5
Hypoxia via hif1a dn	Hypoxia via hif1a dn	108	0.38841103893827483	1.44939177634376	0.009670409270833262	0.045006276931646765	0.03268987301650954	5270	tags=40%, list=28%, signal=29%	CXCL12/MMP3/CCN2/MMP8/CACNA1H/LHX9/FOXG1/ANKRD1/KIF5A/CAV1/ARX/KLF4/CCN1/TIAM2/NPTX1/LLGL1/ERRFI1/DMP1/PGF/PPL/POU6F1/FST/ZFP36/SPRY2/CSRNP1/FOXO3/DEPP1/SH3BP4/SGK1/FOS/CDC42EP3/ENO2/TMPRSS11D/LXN/MYH9/LNPEP/TCIM/TK2/SKIL/SAMSN1/ADM/VEGFA/PPP1R9B
Targets of nup98 hoxa9 fusion 16d up	Targets of nup98 hoxa9 fusion 16d up	168	0.3657095671080201	1.4468048496199275	0.0062362974713274935	0.03239294935525461	0.023528304788723878	3760	tags=33%, list=20%, signal=26%	SIGLEC6/PTGFR/CD1E/NEGR1/CPA3/CD1A/CES1/KIT/FN1/AFF3/ADGRA2/HOXA9/XYLT1/HOXA3/NRG1/CFD/TSLP/TPSAB1/HOXA7/GEM/HOXA5/HBD/CD1C/TMEM200A/THBS1/ITGA7/HBB/ZNF366/LUM/MAP4K1/FCAR/SLITRK4/PTGS2/ABCB4/HBA1/IKZF1/CCR6/PALLD/LILRA1/NDRG2/DENND5B/ADRB1/OPN3/LTBP1/BEND6/MEF2D/ADAM19/TESPA1/PCDH20/GAPT/CDC42EP3/RAB33A/ZDHHC17/FLNB/CHST2
Chronic myelogenous leukemia dn	Chronic myelogenous leukemia dn	115	0.38361761887906365	1.4463777435010863	0.010358571483593244	0.04743765358530879	0.03445587988226806	4781	tags=40%, list=25%, signal=30%	JAM2/KLF2/MN1/HAL/F13A1/DACT1/LHFPL6/GPX3/SLC16A7/EPB41L3/LPL/GATA3/TGFBI/FZD2/GAS7/ELANE/PROM1/IL7R/CSF1R/KLF4/GSDME/MPO/GLIPR1/CST7/SATB1/MYLK/MAFB/FGFR1/CLEC4A/IL10RA/SH3BP4/IL16/MS4A4A/MNDA/FLNB/CLEC5A/GADD45B/TLR2/BCR/FGL2/BTG2/CDH2/PTPRE/GPR137B/CCR7/LILRB3
Hcmv infection 6hr dn	Hcmv infection 6hr dn	161	0.3665855555025251	1.4454107396388465	0.007285036840259408	0.0364747422750403	0.02649307551237502	6024	tags=46%, list=32%, signal=31%	DKK1/HMGA2/HOXA9/AJAP1/MN1/FRY/FGF2/NAP1L3/TLE4/THBD/STON1/GLI2/CLCN6/BICRAL/ADCY7/TSPYL4/ALMS1/ETV1/SRGAP2/ARNT2/BDKRB2/PSG3/MSX2/IL7/SCHIP1/TSC22D2/S1PR1/TXNIP/DOP1A/AMOTL2/CREB5/SCAF8/DEPP1/TCF21/SGK1/MED21/ARID5B/OSR2/PRDM2/EPB41/BCL9/PNISR/TCF7L2/GAS1/MDM2/ID2/PHF3/ZBTB24/P2RY10/NR3C1/MDM1/FAM168A/PRKAR2B/PARP4/ZNF230/FBXL2/BACH1/PHF20/PCMTD2/CBLB/CDC40/BICD1/ARHGEF2/CENPF/CDKN1B/SMAD5/ARL4C…
Med1 targets dn	Med1 targets dn	237	0.35238831933667236	1.443205644111739	0.003779585805487601	0.021964779565049695	0.01595390473883452	5821	tags=38%, list=31%, signal=27%	CDH10/DKK1/HOXC13/TIMP3/MN1/HSPB7/BMP6/ACKR3/COL1A1/CDKN1C/PLPP3/GRK5/RGS2/AXL/TFPI/SNAI2/EPHB4/KLF4/FBXL18/BAMBI/TSC22D3/FHL1/PRRC2B/KANK2/RHOB/PALLD/SLC2A3/ABTB2/RCBTB2/PIM1/ADCY9/RHOBTB1/TXNIP/AMOTL2/PDE2A/CITED2/PLK2/SLC35E3/DUSP5/CDA/KLHL24/ARID5B/LAMA5/PCNT/HERC1/AGAP1/TLE3/DLG5/MDM2/ID2/GADD45B/SMTN/SPAG9/ZMYM2/DENND3/RCAN1/LXN/PHLPP1/ATF3/OGA/PRDM4/FOSL2/HMOX1/SFSWAP/FMNL1/HBP1/TRIO/MTCL1…
Circadian rhythm genes	Circadian rhythm genes	199	0.358159798043786	1.4427042172815991	0.005070762343866901	0.027792093186810928	0.02018651750553957	3832	tags=28%, list=20%, signal=22%	MAGEL2/ADIPOQ/NKX2-1/NGFR/SERPINE1/CRH/KCNH7/ADCY1/LEP/EGR3/HTR7/HCRTR1/PTGDS/PAX4/DRD1/PER1/MC3R/MAPK10/ID3/BHLHE41/OPRL1/IL6/PROX1/PROK1/PPARG/ADORA2A/BTBD9/EGR1/RAI1/NOS2/ARNT2/RORB/DRD4/SLC6A4/STAR/GHRL/AVP/ZFHX3/CRTC1/OPN3/MTNR1B/SIX3/CRY2/KLF9/SIK1/PPARA/CHRNB2/NLGN1/ARNT/MTTP/RORC/ROCK2/TH/GSK3B/JUN
Leukocyte transendothelial migration	Leukocyte transendothelial migration	114	0.3823430859802129	1.440670903577508	0.008772453770839633	0.04196442138102673	0.030480450721140497	3793	tags=32%, list=20%, signal=25%	CTNNA3/CLDN19/JAM2/CXCL12/ACTN3/MMP2/MMP9/CLDN5/MYL10/CLDN11/MYL2/CLDN15/JAM3/PLCG1/CLDN14/AFDN/CDH5/PIK3CD/PLCG2/CLDN20/ITGAM/CLDN9/PIK3R5/CLDN18/VCAM1/ITK/PXN/ITGA4/CYBB/ITGB1/ARHGAP35/PIK3CB/CLDN8/ROCK2/PECAM1/VAV2
Foxp3 targets in thymus up	Foxp3 targets in thymus up	195	0.35742350879785095	1.4377666627892216	0.006709062478271625	0.03425089963784534	0.024877808967910302	6289	tags=43%, list=34%, signal=29%	CELF2/PDE4B/LATS2/IL7R/CDK19/ELK3/GPR183/MAN1A1/NT5E/DOCK10/RGS1/ERRFI1/FLI1/C2CD5/HIVEP2/ABTB2/ZBTB20/MAP3K5/JARID2/ARHGEF10/KLF6/CD84/STAT5B/SLA/AKAP13/CD69/PTGER2/WDR37/CITED2/GPRIN3/SOCS2/EXOC6B/NCOA3/TNFSF11/CD28/TESPA1/ARID5B/PIP4K2A/RAB8B/ETNK1/LRCH1/TCF12/TNFAIP3/KAT6B/SEC63/ARHGAP5/P2RY10/ASXL2/GLCCI1/NR3C1/GBP6/NFKBIZ/ETS1/LDLRAD4/ARMT1/IRF4/MDFIC/LTA4H/WNK1/KIF3B/TBC1D5/ZFP36L2/HBP1/TR…
Tolerant macrophage dn	Tolerant macrophage dn	412	0.33298731298040135	1.431637735881257	9.596927280216074e-4	0.007457521771896412	0.005416698655420838	5063	tags=34%, list=27%, signal=25%	SERPINE1/SELP/TAL1/POU3F1/PTPRD/FOXP4/ADAMTS4/VCAN/TNFSF4/HDC/ZEB1/CCND2/CH25H/TNC/DLL1/FILIP1L/ANGPT1/PDE4B/PLAGL1/IRGM/AKT3/SMIM36/FRMD4A/IL6/FZD1/CAV1/APAF1/IL33/PMEPA1/SYNE3/FSCN1/NOTCH1/ERRFI1/GNG4/MED13L/TCF4/AGRN/MAFK/ZBTB32/PTGS2/PPFIBP1/NOS2/CHST11/ENG/PTPRJ/IKZF1/RGS16/LUZP1/ADGRL2/RAI14/SCHIP1/HIVEP2/ABTB2/PIM1/ZFP36/JARID2/CACNB3/F2R/KAT6A/DUSP16/MCF2L/CREB5/CD69/COL27A1/SPHK1/PTX3/CS…
B lymphocyte progenitor	B lymphocyte progenitor	273	0.34504556868181	1.4290250514770155	0.0034413265127391725	0.020378981831761168	0.014802075925938003	5664	tags=40%, list=30%, signal=28%	ZNF423/BACH2/SEMA6A/CD22/COL5A1/PXDN/AEBP1/SCN3A/DACT1/MME/ITPR1/PSD3/ID3/TLE4/SPTA1/NID2/RIMS3/KDM5D/IGF2R/CHST15/CAV1/FOXO1/ARPP21/MAGED4B/PLXNA1/HRK/IL7R/IRS2/ELK3/DUSP26/DDX3Y/SYNE3/CORO2B/TCF4/PPFIBP1/STAG3/USP34/PIK3CD/P2RY14/RHOB/SCHIP1/MAP4K4/JADE2/MYLK/AKAP12/CACNB3/RASL10A/CD69/HIP1R/DYRK2/CITED2/SOCS2/DEPP1/RB1/ZFYVE16/MLXIP/LILRA2/CD79B/ARID5B/PKD2/PRDM2/PNISR/JUN/MEF2C/CHD7/ABCG2/LIL…
Regulated by myc dn	Regulated by myc dn	250	0.3463113779684595	1.422509663884034	0.005494356822618898	0.02957881541288669	0.021484285876269247	4838	tags=35%, list=26%, signal=26%	OPRPN/SERPINE1/FN1/GABRG2/COL5A1/PDGFRA/CSPG4/CCN2/COL3A1/FSTL1/PDGFRB/COL1A1/COL6A3/LOX/INHBA/PAM/JPH2/ID3/IGF2R/MCC/THBS1/DUSP1/FZD1/CAV1/TIMP2/COL1A2/SPARC/AQP1/POSTN/MGP/KLF4/SLC4A1/TGFB1/ERRFI1/GPC1/SNCA/UGT1A1/TCN2/SLC2A2/HIVEP2/PIM1/AKT2/AKAP12/F2R/ANXA6/VEGFD/CDKN2B/PLD1/VCAM1/RB1/KLF7/GCN1/LAMC1/F3/ITGB1/ARVCF/MYO1B/CALD1/SYNJ1/SERINC3/PPP1R15A/NPPB/NIBAN1/GAS1/NREP/PMP22/TGFBR2/POM121/M…
Hdac3 targets up	Hdac3 targets up	476	0.3274676142996166	1.4218555207597872	5.389928071307819e-4	0.004698631036104549	0.00341280511060634	4994	tags=35%, list=27%, signal=27%	ADGRL3/SFRP1/FN1/ADAMTSL1/RGS4/HMGA2/PDK4/MMP16/PHLDB2/SLC6A15/NAV3/SHISA2/MMP14/TIMP3/XKR4/GEM/CCND2/STMN2/SERPINE2/CDK6/CDKN1C/ADAM12/PDE4B/LOX/NEFL/MMP9/AKT3/GNG2/GPR176/BMP2/GFPT2/ANTXR2/PAPPA/IGF2R/ZNF697/SAA1/IGF2BP3/HTRA1/PLEKHH2/IGFBP5/CCDC88A/PTPRB/GASK1B/IL7R/BMP5/ELK3/MAN1A1/CEP170/SRPX/FAM126A/DST/ERRFI1/MAP2/SPRED2/PPFIBP1/DPYSL3/LEPR/ROR1/TEAD1/USP34/AKR1C1/RGS16/EDIL3/TUBA1A/RHOB/L…
Foxp3 targets cluster p3	Foxp3 targets cluster p3	161	0.3599876356935497	1.4193957916737097	0.010259458533179019	0.04715140977960599	0.03424796946847403	5306	tags=45%, list=28%, signal=32%	SORCS2/PEAR1/F13A1/IGFBP4/ACTG2/ATP6V0D2/RNF144A/ST8SIA1/GJB2/SP4/PDE3B/PPM1L/CAMK2N1/SPOCK2/ZNF608/CAMK2B/PTPRJ/ABCA2/IL18R1/SLC2A3/RHOBTB1/SPTBN1/C1QTNF6/PDE2A/PGLYRP1/ATP6V0A1/DGKD/PLXDC1/IL10RA/CBX7/MYO1F/CYP4F8/RAPGEF5/LAMC1/CYBB/ACOXL/CASS4/NCMAP/MS4A4A/ALDOC/ARMCX4/ENTPD1/CD200R1/SERINC3/RNF216/POU2F2/ID2/GPR34/DHX37/FGL2/TGFBR3/PRDM1/CXCR6/CLIP1/PHLPP1/RIN2/GGT1/ITGB5/OGA/KLRG1/JAK1/CD74/…
Hedgehog signaling paracrine dn	Hedgehog signaling paracrine dn	240	0.347047671931324	1.4193930091194615	0.004043244065574867	0.023222735145865904	0.01686760858196169	3679	tags=30%, list=20%, signal=24%	NXPH1/NCAN/SEMG1/ZIC1/CUX2/CADM2/SNTG1/EYA1/TRDN/MS4A2/TNR/COL4A4/NMBR/SCRG1/FLRT2/POU3F1/SPATA16/THBS4/ELFN2/HTR7/TBR1/SLC15A5/HAVCR1/MYH1/ZIC5/TRIM63/RBM46/FABP1/PDLIM3/PRDM16/CECR2/GRIA1/PAPPA/SLC5A12/PVALB/CABP7/FAM131B/ARPP21/UBE2U/GRIK1/ADORA2A/LRRTM2/TAS1R3/KLHL41/SLC25A27/SUSD5/SPEG/PTPRJ/ASCL1/COL12A1/SLC29A4/PYGM/HEPACAM/DAAM2/MGAT5/GRIP1/TRIM7/MYH4/SOCS2/USP17L2/SEMA3E/IL16/CD28/CASQ2/…
Klf1 targets up	Klf1 targets up	488	0.325586295631124	1.417623454355214	0.0012444817102147867	0.009094425207129902	0.006605647599572329	3711	tags=24%, list=20%, signal=20%	COL2A1/EPB42/FOXP2/MAGEL2/FABP4/FBN2/TMEM59L/KIF26B/CAVIN2/APOB/GHR/FN1/COL14A1/ATP1B2/TF/SLC39A5/SV2B/STAB2/PTPRD/PXDN/IGF2/SLC38A4/AEBP1/ALAS2/ABCA8/GPC6/BGN/TIMP3/MYH7B/VTN/COL11A1/COL5A2/SLC36A2/NRK/COL3A1/RBP4/FSTL1/DLL1/LHFPL6/COL1A1/DLC1/PEG3/MARCO/IRAG1/ADAM12/PLAGL1/DCN/IRGM/GARRE1/SPTA1/NID2/LPL/CRP/HS3ST3B1/FZD1/LECT2/VWF/COL1A2/COL6A2/SPARC/PTPRB/IRS2/IGSF3/ABCC8/LUM/TREML4/FAM126A/YP…
Neurotransmitter receptors and postsynaptic signal transmission	Neurotransmitter receptors and postsynaptic signal transmission	205	0.348938222932482	1.4153031949054828	0.005512017387530614	0.029612005819142563	0.021508393406148216	4136	tags=36%, list=22%, signal=28%	TUBB2B/GRIN2C/GRIN2B/GABRA1/CHRND/GABRQ/GABRA4/KCNJ15/PRKAG3/CAMK2A/GNAT3/ADCY1/GABRG2/NRG1/ADCY5/KRAS/KCNJ10/KCNJ6/GABRA3/LIN7A/ADCY2/NEFL/RASGRF2/GNG2/GRIA1/MAPT/HTR3E/TUBB4A/GRIK2/GNB3/CHRNG/GRIK1/GRIA4/NBEA/GRIK5/ADCY7/RPS6KA2/GNG4/GABBR1/ADCY6/CAMK2B/CACNG4/TUBA1A/GRIN2D/GNG11/KCNJ4/KCNJ9/ADCY9/DLG4/GRIP2/TUBB2A/GRIP1/APBA1/TUBB8B/DLG2/GNAL/GABRA5/GRIA3/CHRNB2/ADCY4/PPM1F/PLCB2/TUBB3/GRIA2/K…
Covid19 nonicu vs healthy donor platelets dn	Covid19 nonicu vs healthy donor platelets dn	208	0.34886650716189394	1.409329020679736	0.006897763312998101	0.03494324148334928	0.025380684756723337	3060	tags=28%, list=16%, signal=24%	REG1B/CADM2/CAVIN2/SDK1/CXCL12/FCER1A/AFF3/PTPRD/IGF2/SLC18A3/TGFB2/APCDD1L/CAVIN1/CTNND2/CD1C/ANGPT1/ZC3H12B/ADAM12/LOXHD1/NAP1L3/MAPK10/GPR55/PHACTR3/DMD/PAPPA/PAPSS2/GLRA4/ENTHD1/TGFBI/KDR/WDFY4/GASK1B/P2RY12/IL7R/ADORA2A/FAM189A1/MINAR1/EMCN/LDB2/PID1/ZNF117/PF4V1/DPYSL3/LEPR/MS4A7/WNT9A/P2RY14/LILRA1/EPAS1/OR11L1/TMEM150C/TBX3/CEMIP/KCNAB1/SLC4A8/WLS/UTRN/PLD4
Sema3b targets up	Sema3b targets up	252	0.3418585961780741	1.4059189654818562	0.0062347603568149185	0.03239294935525461	0.023528304788723878	2774	tags=22%, list=15%, signal=19%	POU3F4/SERPINE1/FCGBP/HOXD13/HOXA2/KCND1/CCDC80/ITGBL1/CLIP3/PCDHB6/SLC35F1/SYT1/NXPH2/CCN2/LVRN/PCDHB11/C19orf12/DLC1/TOX2/FGF1/ANTXR1/TMEM200A/POP4/GARRE1/PNPLA7/KSR1/THBS1/TGFBI/AXL/ADRB2/CD302/FZD2/TRO/ITPR3/SPARC/URI1/CTHRC1/TSHZ3/KIF3C/SRPX/SERPINI1/SPRED3/RTL5/PPL/GLIPR1/TAS2R3/CAMK2N1/SPEG/NDST1/SUFU/MAP1B/LTBP2/ITPKC/KPNA5/LOXL1/SUPT5H
Mef hcp with h3 unmethylated	Mef hcp with h3 unmethylated	221	0.3447618852921458	1.4053846057729256	0.007008607267979511	0.03540033788689259	0.025712692298934123	2730	tags=26%, list=15%, signal=22%	POU3F4/COL9A3/GFAP/DMRTC1B/IRS4/HTR5A/GABRQ/GPR50/RNF225/GPR182/CDX4/CAMK2A/ADAMTSL1/HOXA3/NXPH2/FSTL5/RHO/HORMAD2/RPH3A/CHAD/NOS1/CLVS1/TKTL2/DPP6/RBP3/SCG3/PCDHA13/NPAS4/PCDHA7/CNTNAP2/CCIN/PAPOLB/PCSK1N/BASP1/ARX/KCNE5/BAHCC1/FGF22/LGI3/NLGN2/SYNPR/SLITRK4/ACRBP/SPEG/FAR2/CLVS2/SSTR2/PLVAP/RAB9B/PCDHA9/PTGIR/SYCP2/KCNV2/MYH14/CHRDL1/PCDHB10/DUSP13
Apoptosis by reovirus infection dn	Apoptosis by reovirus infection dn	272	0.3388588856905751	1.403063464666571	0.004237268459407651	0.024202225169476958	0.0175790516666988	4673	tags=31%, list=25%, signal=24%	COL2A1/FLNC/LRP4/FBN2/SFRP1/ZCCHC24/VCAN/SV2A/JCAD/SERPINE2/ITPR1/ENPP2/RIMS3/IGF2R/TUBB4A/P3H3/FZD2/EPHB4/NOTCH3/IGFBP5/ITPR3/PTK7/ITGA7/IGSF3/COL4A6/CCNE1/NPTX1/FSCN1/FGFR3/GPC1/INTS1/AGRN/EP400/EPHB2/SRGAP2/GNS/RGS16/PLCG2/ABCA2/SLC29A1/MYO9B/ADCY9/ULK1/TBC1D2B/MGAT5/ARHGEF10/TXNIP/ATP7B/GPLD1/ADD2/BRCA1/SBF1/NISCH/LAMB2/DEPP1/ARHGAP35/OBSL1/ABCC10/LAMA5/PPARD/MAPRE2/ARHGEF17/ZFC3H1/COL4A2/TSP…
Response to uv nhek dn	Response to uv nhek dn	300	0.3350618422142937	1.4018908690853653	0.0033230873992419123	0.019907611954528292	0.014459700984461444	7272	tags=55%, list=39%, signal=34%	DKK1/HMGA2/NAV3/AJAP1/MN1/HEG1/TP63/PSD3/IRS1/TLE4/ID1/ADRB2/FOXO1/IGF2BP3/CCNE1/CEP170/BICRAL/DST/MED13L/AHDC1/SACS/CREBBP/SH2B3/POGZ/SATB1/ADGRL2/DOCK4/HIVEP2/ADCY9/MAP3K5/JARID2/SPEN/KAT6A/NFYA/CBFA2T2/FYN/FNDC3A/DOP1A/ASXL1/REV3L/DYRK2/WDR37/GNE/ARID3A/FOXO3/ZNF318/KLF7/CCDC93/RAPGEF5/KLF9/CLASP1/NCOA3/SERTAD2/AFF1/ARID5B/ZCCHC14/SKAP2/MICAL2/ZFC3H1/PNISR/FNBP1L/ABL1/RAPGEF2/PALM2AKAP2/QKI/MT…
Hdac1 and hdac2 targets up	Hdac1 and hdac2 targets up	228	0.3410886163689019	1.3918318039438713	0.008147473256077741	0.03982522031813332	0.02892666276376348	4959	tags=36%, list=26%, signal=27%	SFRP1/MC5R/DKK1/CES1/PTPN5/FN1/AFF3/PRRX1/NAV3/RAB3B/DCLK1/IL13RA2/EPHA4/GEM/CCND2/COL6A3/NKD1/RGS2/MMP9/TMEM200A/BMP2/TGM2/TRIML2/GFPT2/ANTXR2/IL11/SAA1/DKK2/IL7R/ELK3/CCNE1/CEP170/JAM3/EPHB1/EGFR/MYCT1/LDB2/PGF/TIE1/SPRED2/SH2B3/CHST11/MEGF10/DOCK4/ADGRL4/TMEM158/ROBO4/SPHK1/PTX3/PXN/PPARA/IL1RAPL1/SUPT6H/ADAMTS6/PLAU/WDR6/MICAL2/TNFAIP3/POU2F2/TGFBR2/MAOA/ODAPH/OLAH/PLAUR/PRDM1/STK10/HOMER3/NF…
Aging kidney up	Aging kidney up	469	0.3199892867057349	1.3895836946891544	0.002127753303450197	0.01398237885124415	0.010155965351457373	3228	tags=24%, list=17%, signal=20%	GFRA1/COMP/SVEP1/FN1/COL14A1/FBN1/COL5A1/PXDN/CXCL14/ZCCHC24/AEBP1/NUAK1/FXYD5/DKK3/RBMS3/TSPAN18/COL8A2/SULF2/HTR7/CELF2/DOCK11/ADRA2A/VCAN/TPSAB1/COL3A1/CCND2/SCN5A/TNC/SERPINE2/C7/COL1A1/CLEC10A/RTN1/LIX1/ATP8B2/PREX1/INHBA/ANTXR1/GNG2/PAM/CDH11/RUNX2/NR2F1/VIM/RUNX3/ANTXR2/CHST15/BHLHE41/ALPK2/TGFBI/AXL/FIBIN/STAB1/TFPI/VASH1/TIMP2/ITM2C/COL1A2/ZEB2/ITPR3/CCDC88A/GASK1B/PROM1/MOXD1/CSF1R/CTHR…
Oct4 targets	Oct4 targets	288	0.33281787602714974	1.3892513586033792	0.006721207207659479	0.03425089963784534	0.024877808967910302	4104	tags=26%, list=22%, signal=21%	ZIC1/SALL1/SFRP1/DKK1/DTNA/TAL1/SFRP2/TCF7L1/THBS2/GAP43/CCN2/ELAVL2/LEFTY2/NEFM/NEBL/TNC/DPPA4/STMN2/ZIC2/LRRN1/NEFL/MMP2/FGF2/RASGRF2/ANKRD1/ENPP2/OSR1/LAMA4/OLFML3/MCC/KDR/FOXO1/KLHL4/KCNN2/ZEB2/USP44/MSC/CACNA2D1/DPYSL2/CDK14/RDH10/EOMES/BAMBI/TCF4/DPYSL3/ROR1/LRFN3/COL12A1/SULF1/ARID1B/NAALAD2/ABTB2/JARID2/FGFR1/KAT6A/IRX2/SMIM3/FZD10/KLF7/GJA1/PLPP1/RNF24/IL1RAPL1/OBSL1/BMP7/TCF12/ENTPD1/TD…
Lung cancer good survival a4	Lung cancer good survival a4	194	0.3453513534906301	1.3873980279552438	0.010164714193162854	0.046799470530093853	0.03399234180583599	4889	tags=38%, list=26%, signal=28%	NKX2-1/PSG4/CAVIN2/EFEMP1/SLC7A10/LMO3/ZBTB16/BMP3/GEM/GNA14/DLC1/PER1/NEDD9/FGF4/TNS2/RIMS3/DUSP1/SYNE1/ZNF750/NDNF/ST3GAL5/ELK3/APOD/ADCY7/SCEL/CCNJL/RPS6KA2/PARM1/FAM184A/PBXIP1/CHAT/SPTB/SCRN1/PSG3/HDAC5/SFTPA2/DAAM2/MALL/ABCA3/ARHGEF10/ESR1/MAP1LC3C/CDC42BPA/CITED2/FMO5/TLE2/REL/WSB1/GON4L/ADGRF5/NBPF10/RAPGEF2/QKI/RHOBTB2/AASS/EPB41L1/MAOA/ABCA4/CEACAM8/PPP2R3A/TIPARP/FYCO1/NAB2/NR3C1/PIAS3…
Mll af4 fusion targets g up	Mll af4 fusion targets g up	241	0.336833128967146	1.3781837424242762	0.010906935371709453	0.04927625850557695	0.03579133274504047	3709	tags=29%, list=20%, signal=24%	ADH1B/IGDCC3/FBN2/TMEM59L/NEGR1/DHH/LYVE1/TRABD2B/SELP/PTPN5/OR11H4/GAP43/SLC35D3/CLMP/TSLP/RHO/MXRA8/ACTA2/CYP2A6/CTNND2/ANGPT1/ROR2/EPHA7/CYP1B1/C1QTNF5/SLCO6A1/MAPT/PRKG1/KDM5D/THBS1/FIBIN/P2RX6/TET1/NDNF/ZBTB47/SYT11/MRGPRF/SPARCL1/BMF/PTPRO/SORCS1/DOCK10/GNG4/FLI1/ST18/NDN/CYRIA/RAI14/IGF1/PALLD/DAAM2/KAT6A/SIX2/ZNF568/C1QTNF6/CHGB/SPON2/NF1/CRMP1/LPIN3/DEPP1/CREBRF/TTC34/ARID5B/EGR2/OSR2/SC…
Hepatoblastoma up	Hepatoblastoma up	209	0.3388887713655898	1.3710696849599242	0.008254202045900287	0.040194375180036185	0.02919479481959559	7081	tags=52%, list=38%, signal=33%	DKK1/PIEZO2/HMGA2/SERPINE2/PEG3/VWF/EMCN/BAMBI/PRKD1/KDM5B/TSPYL4/GABBR1/ETV1/TULP4/NDN/PLXNC1/PLVAP/PALLD/MAP4K4/PLPPR1/RHOBTB1/ASAP2/JARID2/TNKS/MAP3K4/TBX3/CAP2/HSPA2/UTRN/MARCKS/RNF38/CBX5/GJA1/NCOA3/LAMC1/POMK/DDHD2/OBSL1/ROCK2/CBX6/TDGF1/SOCS5/FNBP1L/ANKRD27/PFKM/KDM3B/SEPTIN8/TARBP1/DLG5/UNC119B/PDGFA/COL15A1/DCP2/TRIB2/MTR/CRIM1/MMP11/FRRS1L/COQ8A/RCOR3/HEATR1/BCAM/CKAP4/DRAM1/ROBO1/CD24/…
Silenced by methylation in pancreatic cancer 1	Silenced by methylation in pancreatic cancer 1	403	0.31919115608989546	1.3707427784281487	0.0038424500018844373	0.022243036415402942	0.016156013905025635	3482	tags=28%, list=19%, signal=23%	SALL1/SFRP1/NGFR/SSX3/FOXE1/SERPINE1/CPA3/CACNA1G/COL4A3/EFEMP1/NPTX2/MAGEA9/CXCL12/CLIP3/HIF3A/CD22/HOXA1/PXDN/HOXA9/IGF2/HOXC13/ZCCHC24/TIMP3/VTN/PCDHGC3/CYP26B1/HDC/PLXNB3/MRC2/RBP4/BARX1/LHFPL6/CDH8/IL36RN/CDKN1C/PER1/COL6A3/LYPD3/AGPAT4/CLDN5/CYP1B1/MYL10/LHX1/SERPINF1/IGFBP3/MIA/SAA1/RGS17/WNT4/MAGED4B/PADI4/SPARC/TWIST1/KLHL11/KIF21B/NCOR2/MMP19/ITGA7/COL4A6/SLC4A1/SVIL/DIRAS3/COL21A1/NPTX…
Pubertal breast 3 4wk up	Pubertal breast 3 4wk up	209	0.3355597065081371	1.3576010182734295	0.009341569716584109	0.04395229879437564	0.03192432621240712	4037	tags=28%, list=22%, signal=22%	PI16/SFRP1/MYH11/EFEMP1/KIT/COL16A1/PTPN5/FN1/PEAR1/LALBA/COL8A1/CXCL14/CSPG4/MMP14/ADGRD1/LRATD1/HAL/MRC2/TNC/EDNRA/TGFB3/TFCP2L1/GATA3/CSN1S1/FZD1/CD248/BASP1/CCN1/PADI2/CNN1/FSCN1/TIE1/RASSF2/SRPX2/KCNB1/CDH5/DNM1/MAFB/RUNX1/ABCC3/IRX2/CDKN2B/ATP6V0A1/TMPRSS2/PLK2/GJA1/BMP1/GAB1/EGR2/HSD11B1/LIMA1/ALDOC/CITED1/FXYD3/GAS1/FGF13/KIAA1522/KRT7
Regulation of actin cytoskeleton	Regulation of actin cytoskeleton	222	0.33222481645158214	1.3561779978355828	0.010314512551672195	0.04732000771702151	0.03437042894614488	3793	tags=27%, list=20%, signal=22%	FGF10/FGF17/MAPK4/FGF7/FN1/FGF23/PDGFRA/FGF19/KRAS/PDGFRB/ACTN3/FGF1/PDGFD/ITGA11/BDKRB1/FGF2/MYL10/FGF4/ITGA10/APC2/MYL2/FGF11/ITGA5/ITGA7/TIAM2/FGF22/EGFR/FGFR3/ARHGEF6/ITGA8/MOS/MRAS/BDKRB2/PIK3CD/GNA12/ITGAM/FGF12/IQGAP2/PAK3/MYH14/MYLK/DOCK1/FGFR1/F2R/INSRR/SSH1/PIK3R5/PXN/ITGA4/ITGB1/APC/MYH10/PIP4K2A/ARHGAP35/PIK3CB/PIP5K1B/WASF2/ROCK2/NCKAP1L/WASF1/VAV2
Breast cancer relapse in bone dn	Breast cancer relapse in bone dn	297	0.3218201636659455	1.3466679115703233	0.008711565325502225	0.04178955731563079	0.030353439902146832	3247	tags=27%, list=17%, signal=22%	COL2A1/COL9A3/SOX11/PTGFR/ZIC1/SFRP1/COL11A2/DKK1/PTPRZ1/TUBB2B/NPTX2/ELN/SCRG1/KRT81/CD22/CRLF1/HOXA9/WIF1/MMP14/BGN/LEFTY2/CYP26B1/EN1/PKP1/NLRP1/PEG3/MARCO/NDUFA4L2/CAPN6/ACTG2/FABP7/L1CAM/TFCP2L1/ACAN/RUNX3/FZD7/PDPN/MIA/ITM2C/IGF2BP3/ST8SIA1/PADI2/CEP170/MAP4K1/EGFR/FSCN1/CTAG1B/MAGEA4/CHST3/HLA-DQB2/RYR1/PTGS2/ROPN1/USP34/MRAS/AKR1C1/SLC2A3/TMEM158/MALL/KCNG1/SOX10/KLF6/TUBB2A/KRT6A/FYN/LTB…
Cbfa2t3 targets up	Cbfa2t3 targets up	381	0.31481662282346273	1.345003966975743	0.00610781875413055	0.03181747444012194	0.02311031416202874	5722	tags=43%, list=30%, signal=31%	GFRA1/SIGLEC6/GBX2/CTSG/TMEM119/CD300LG/TF/NRG1/TSLP/RASSF8/CD209/CELF2/F13A1/HDC/CXXC4/CCND2/MCTP1/CLEC10A/PAM/MAP3K15/MAN1C1/MGAM/MDGA1/ID1/TGFBI/STARD8/EBF1/HIVEP3/NOTCH3/CLDN15/C1orf21/GAS7/ELANE/CD93/MYCT1/TEK/H2BC14/KCNIP3/ARHGEF6/TSC22D3/SERPINB10/CST7/PTPRJ/PHF21A/RAB31/SSTR2/ATP8B4/P2RY14/PLCG2/RHOB/TCN2/H6PD/ADGRL4/RHOBTB1/SUN2/SPTBN1/F2R/LDHC/LMO1/CDK5R1/PDE2A/SLC4A8/WLS/OR2A14/APPL2/E…
Bound by foxp3	Bound by foxp3	488	0.3079563866014159	1.3408617083172953	0.007815359138289764	0.03845724000044781	0.02793304351944917	6114	tags=40%, list=33%, signal=28%	CDH10/NR4A3/SELP/KLF2/CACNB4/CELF2/COL11A1/OR2V1/ENPP1/ENOX1/PDE4B/BCL11B/GNG2/RGS13/LATS2/GATA3/AXL/BCL2/VWF/PTGER4/IL7R/CDK19/ELK3/ST8SIA1/GPR183/MAN1A1/TLR8/NT5E/PLCG1/DOCK10/ZPBP2/RGS1/FRS2/SCN8A/FLI1/PARM1/SNCA/ATP8A2/C2CD5/LRRC8C/MS4A7/ZNF608/TET3/SATB1/ANKRD44/TMEM252/HIVEP2/ABTB2/RCBTB2/MAP4K4/ZBTB20/SPTBN1/MAP3K5/USF3/S1PR1/JARID2/ITPR2/MGAT5/WDR35/ARHGEF10/PTGER3/KLF6/RASA3/FYN/WIPF1/ST…
Npc icp with h3k4me3	Npc icp with h3k4me3	446	0.3093011360420001	1.3370987573916704	0.007435011328448727	0.037153422273683644	0.026986028151141175	3771	tags=26%, list=20%, signal=22%	NCAN/LRRC4B/CDH10/SOGA3/PDE1C/CAVIN2/KCNA4/LRP1/TSPAN11/DTNA/SCRG1/GAP43/SLITRK1/MRGPRE/NAV3/SYT1/DDR2/ABCA8/SLC26A7/RBMS3/ABCA9/ADAMTS4/BMERB1/COL1A1/ACTN3/ANGPT1/PDE4B/LIX1/TGFB3/USP49/AGPAT4/IRGM/CNTNAP1/GNG2/GRM3/B3GALT2/MAPK10/ZC4H2/NRXN1/FRMD4A/AXL/ARMH4/CSRNP3/FRG2C/ZEB2/SPARC/PCYT1B/ADAMTS12/TCTN2/TRIM46/LRRN3/COL4A5/GPR183/LOXL3/LRRTM2/SPARCL1/C8orf48/SERPINI1/RCOR2/SPRED3/RHOJ/CPT1C/GRI…
Inflammatory response lps up	Inflammatory response lps up	495	0.30594521750053005	1.3329236448410189	0.0066174838537738576	0.03395744702653677	0.024664662508037394	4717	tags=31%, list=25%, signal=24%	FOXP2/ADH1B/ANGPTL1/FGF17/NGFR/SNTG1/BRINP1/SERPINE1/MAPK4/C11orf96/SEMA6C/NRAP/SEMA6A/KRTAP2-2/PRRX1/ADAMTS5/PXDN/ADAMTS7/EGR3/DDR2/RAB3B/PNMA2/SELE/TSLP/HSPB7/LRATD1/HAL/DMRTC2/ARHGAP31/CH25H/RPE65/WNK4/CCL18/PLPP3/NEFL/IRGM/GRIA1/BMP2/IGFBP3/NKAIN3/SYCE1/GPR68/IL6/HS3ST3B1/FZD1/SH3PXD2B/VWF/MYL2/NLRP14/CAMK1G/KLF4/CATSPER2/BTBD9/TNFRSF1B/SYDE1/EGR1/TGFB1/DDX3Y/FCAR/KIF1B/BCL6B/KLHL41/EGFR/TBX2…
Rho gtpase cycle	Rho gtpase cycle	449	0.30413086481654794	1.3143577514424536	0.005138020252124477	0.027982114523197998	0.0203245376614026	6792	tags=45%, list=36%, signal=30%	ACTC1/SLITRK3/PLEKHG2/ARHGAP6/DOCK11/ARHGAP31/STMN2/CAVIN1/DLC1/SH3PXD2A/PLXND1/PREX1/RASGRF2/ARHGAP24/GARRE1/VIM/ARHGAP40/STARD8/OBSCN/ARHGAP28/CAV1/DOCK3/SHKBP1/PLXNA1/CCDC88A/BASP1/TIAM2/SYDE1/ARHGEF40/RHOJ/ARHGEF15/DOCK10/DST/FRS2/ARAP3/VANGL2/ARHGEF6/WDR81/FGD4/PEAK1/MCF2/SRGAP2/FARP1/PLEKHG6/DOCK2/RHOB/FMNL3/DOCK4/PDE5A/KIDINS220/MYO9B/IQGAP2/RHOBTB1/PAK3/SPTBN1/DOCK1/AKAP12/SPEN/ARHGEF10L/…
Class 1 transiently induced by egf	Class 1 transiently induced by egf	490	0.29995159082458167	1.3060499354652486	0.00958375840484674	0.04475893564187157	0.032510219068088715	5535	tags=36%, list=29%, signal=26%	OTX2/FOXD1/GABRQ/KCNJ15/ARSI/ADAMTSL2/TSLP/RASSF8/ARHGAP6/SLC36A2/TGFB2/GPRC6A/TNC/ACKR3/SPINK14/ANOS1/FILIP1L/SHISA6/GPC2/SIPA1L2/NEDD9/IFFO2/PITX3/MGAM/PHACTR3/ACAN/CHST15/THBS1/ID1/SLC7A14/ADRB2/SNAI2/ZNF536/PTGER4/IRS2/COL4A6/CCN1/KIAA0513/NUMBL/AFDN/FAM126A/DST/PARM1/RUSC2/LRRC8C/NEDD4/FST/SULF1/RHOB/ITPKC/SCHIP1/ANGPTL4/PALLD/PIM1/FAM83G/ZFP36/JARID2/AKAP12/ENTPD7/SEMA7A/WDR35/KLF6/CNN2/MPR…
Breast cancer progenitors up	Breast cancer progenitors up	430	-0.255626	-1.25558	0.006533916523623731	0.03366273792970946	0.024450603412086706	5162	tags=35%, list=28%, signal=26%	USP1/SSB/C1D/PDK1/TAF2/UBE2D2/CRLS1/TMEM230/METTL9/WDR75/UNG/ANLN/FARSB/RELL1/SRSF3/ARL6IP6/UCHL5/SKP2/SMIM15/AZIN1/LSM5/ORC5/PRIM1/C1orf131/HAT1/CRYZ/TSPAN13/MDH1/BUB1B/BCL11A/RBBP8/PSAT1/CAPZA2/CSTF2/PRELID3B/TCEANC/DNAJC9/BUB1/MED6/DNAJA1/CTH/HMGB2/KIF2C/MTDH/RPE/ARAP2/NCAPG/ZNF22/STK26/PHB2/ARMC10/BCAP29/FAM76B/RNF7/RAD21/ZBTB44/COL25A1/NDUFS4/TRIP13/CALM2/PIGF/VDAC1/C1orf74/POLR1C/SNRPB2/SHC…
Smarce1 targets dn	Smarce1 targets dn	373	-0.265773	-1.28082	0.008725191826929341	0.041815989109153455	0.03037263837917632	3352	tags=30%, list=18%, signal=25%	EIF4E/ZNHIT1/GLRX3/GTF2H2/NAA15/GLA/FANCI/PIGA/SDHB/GALNT14/TAP2/FJX1/BST2/AASDHPPT/AURKA/CTSC/CDC25A/TEX30/ERCC6L/TAP1/GAR1/CREB3/IDH3A/SLC39A8/FH/CXCL3/APIP/TXNL4A/HCCS/PARP12/AKR1B1/CSTF3/NDUFV2/HMGA1/UCHL1/HIGD1A/GRTP1/NDC80/ENOPH1/MAP7D2/SELENOW/CD9/CXCL1/CXCL2/NDUFAF3/HPSE/GTF2A2/MRS2/LGALS3BP/BDNF/PDF/PRDX3/C15orf48/DRAP1/EBP/CXCL8/LAP3/QDPR/BST1/MOK/NOP16/DLAT/SMS/SLBP/GUCY1A2/RAB9A/HSPB1…
Brca2 pcc network	Brca2 pcc network	419	-0.265219	-1.30727	0.0026897027485339765	0.0166755096996956	0.012112094839493683	5837	tags=41%, list=31%, signal=29%	COX11/DHX15/KIF11/SNRPA/MCM7/SRP9/CSTF1/DNMT1/LMNB1/RAD51C/PNN/NCAPH/ASF1A/ZNF273/CD47/CTBP1/SMC5/CPSF1/MYB/E2F1/GLMN/FRG1/LEF1/CYB5B/CPSF4/HMGN4/TFDP1/USP1/RBCK1/BCAS2/FOXM1/UNG/COPS3/MCM5/CHAF1A/SRSF3/SKP2/STIL/MACROH2A1/CENPE/PRIM1/EXOSC8/KIF22/CDC25C/DPY19L2/BAX/MRE11/RAD51AP1/WDHD1/BUB1B/TROAP/RBBP8/BUB3/METAP1/PAXIP1/DNA2/TRIM28/SRPK1/DNAJC9/TMEM186/BUB1/RPP30/PTDSS1/HMGB2/KIF2C/TTK/ITGB3BP…
Foxa2 targets	Foxa2 targets	423	-0.267384	-1.31393	0.00158359184238192	0.011130511830766236	0.00808453938345333	3330	tags=26%, list=18%, signal=22%	FOXA2/PCGF5/PLRG1/GCAT/IDH1/TRPM8/BCDIN3D/CYB5A/LEAP2/TUSC2/PRDX6/EOLA1/SQOR/VPS26B/PCK1/UFD1/SORD/AHCY/PSMG3/NQO2/INSIG1/NUF2/PRDX1/CD82/PFDN2/GHITM/MAL2/PEMT/PBLD/AKT1/FAAH/MIA2/APOC1/CHMP5/FMO3/CD9/LIPC/FDFT1/C6/CXCL2/PES1/COCH/SERPINA1/GSTM1/IFI27L2/KLK11/EEF1B2/ATP5PF/MTX2/SERPINA3/CXCR4/LRG1/EBAG9/FBXO4/CYP2J2/FAH/TIMM9/MRPS2/NDUFA2/H2AC4/DAD1/CDK5/RHOD/TC2N/C8B/FBP1/PSMB10/KIF9/NDUFA8/CYP1…
Prmt5 targets up	Prmt5 targets up	203	-0.29242	-1.33362	0.010177053237659734	0.046814444893234775	0.034003218289361245	3287	tags=28%, list=18%, signal=23%	GCAT/NUP85/PSMC3/CAVIN3/CHRAC1/MRPL48/NUP35/ANP32B/TUFM/AHCY/ELOF1/CSTF3/CTPS2/RCN2/ST7/LSM2/APEX1/SPTSSA/EMC6/TSEN34/PNP/KIF23/UBE2M/ECHS1/POLE2/AURKAIP1/MRPL20/LAGE3/LSM3/CKS1B/AURKB/SLBP/PRELID1/SERF2/NDUFB8/CCNB2/TYMS/MRPS21/EIF1AX/PSMB5/GMNN/CETN2/KPNA2/PPA2/CDC20/ERH/SPCS2/SLIRP/JPT1/NAA38/PTN/GSTZ1/H2AX/PCLAF/NME1/CKS2
Prostate cancer	Prostate cancer	216	-0.298862	-1.36406	0.005270333420644859	0.028579462406242935	0.020758415506332468	2940	tags=23%, list=16%, signal=19%	ATAD2/CLDN3/SORD/PIK3R3/CREB3/SLC39A8/PBLD/CLGN/PLAAT1/AKT1/MIA2/NDC80/ST7/HSP90AA1/COCH/SERPINA1/TBC1D31/CENPN/ELF5/KIF23/BAD/TIMM9/TSPAN8/AR/KLK2/TOX3/MAGEA1/EGF/SPDEF/TMEM38B/TMEM251/GSTP1/EXOSC4/DHRS2/CRISP3/SRD5A2/PRSS2/DDC/GPM6A/AGR2/RLN1/MAGEA2/AZGP1/UGT2B15/HPGD/XAGE1B/PON1/SPINK1/CTAG2
Alzheimers disease	Alzheimers disease	358	-0.282966	-1.3703	0.001169364132303479	0.008680927967763001	0.006305307887667022	3813	tags=36%, list=20%, signal=29%	NDUFS4/NDUFA5/CASP8/TUBA1C/COX6A2/BACE1/CALM2/CASP3/VDAC1/PSMC6/ATP5F1B/COX6B1/EIF2S1/ATF4/PSMC5/COX7C/XBP1/SDHC/CSNK2B/PSMA8/GDNF/TUBA8/PSMC3/SDHB/ATP5F1A/NDUFB5/PSMB4/VDAC2/NDUFA9/NDUFA4/UQCRC1/PSMD12/PSMB7/NDUFB10/PIK3R3/BACE2/CCL7/PSMA6/PSMA7/TUBB4B/AKT1/PPP3R2/NDUFV2/ATP5F1C/NDUFB4/ATP5PO/PSMB2/CYCS/CALM1/ATP5PB/PSMA3/CHP2/DKK4/MT-CO2/PSMC1/NDUFB6/PSMA1/NDUFB7/NDUFV3/ATP5PF/HSD17B10/CXCL8/BA…
Targets of runx1 runx1t1 fusion monocyte up	Targets of runx1 runx1t1 fusion monocyte up	202	-0.30144	-1.37743	0.005280803412396868	0.028579462406242935	0.020758415506332468	3889	tags=34%, list=21%, signal=27%	CTPS1/HSPA5/GCSH/TRIP13/PPME1/RRP9/SEH1L/TNNT1/RAB13/FASTKD1/MTX1/GLRX3/DNAAF2/FAM136A/DDX24/EIF4EBP1/FJX1/MT2A/IFRD2/PSMD12/OAS1/SORD/HSPD1/GBP1/DKC1/EBNA1BP2/NOP56/CBS/ATP1B3/UCHL1/CCL8/PES1/ECI2/NHP2/HSPB1/AKR1C3/ECHS1/POLE2/MDH2/IFI44L/FABP3/LAPTM4B/DLAT/CKB/LY6E/MRPL17/IFI44/PSMB5/MX1/PPP1R14B/NDUFAB1/MT1X/USP18/HSPE1/SLIRP/IFIT1/SNRPA1/C1QBP/SIVA1/ATP5ME/TFPI2/CXCL10/CENPX/NME1/MT1H/ISG15/M…
Tumor zone peripheral vs central up	Tumor zone peripheral vs central up	274	-0.288459	-1.37774	0.005078583588345513	0.027805380071366723	0.02019616830535075	4360	tags=42%, list=23%, signal=32%	KIF4A/GLRX2/ACOT9/CCDC85C/MFAP5/PHGDH/HNRNPAB/NCAPG/TUBA1B/PIGW/UBE2L3/TUBA4A/ZBED2/CTPS1/RFC4/TRIP13/TUBA1C/BACE1/DONSON/APOBEC3B/UBE2N/SHCBP1/EIF2S1/ACOT7/UROD/IRAK1/MED27/MTX1/NAA15/MRPL47/SMIM12/DTYMK/BOP1/PSMB4/COPRS/MRPL48/PSMD12/GEMIN6/KNSTRN/PSMA6/FH/DKC1/EBNA1BP2/GPM6B/MRPL22/TUBB4B/CENPW/POMP/DERL1/RRM2/HMMR/MYCBP/PSMB2/EIF5/TIPIN/ME1/PSMA3/HSP90AA1/PUF60/TPRKB/LY6K/PSMC1/PNP/BDNF/PDF/P…
Myb targets	Myb targets	317	-0.285863	-1.38044	0.0024081553664496076	0.015393072516064985	0.011180609021455342	2950	tags=25%, list=16%, signal=22%	S100A9/CLDN3/ANP32B/AURKA/CCL2/ASNS/DPM2/HSPD1/KRT5/PCCB/EZH2/FEN1/TMEM106C/ME1/TFAP2C/APEX1/PUF60/MYL12A/SETD3/EEF1D/PNP/LGALS3BP/EMP2/SFN/HSPB1/EBP/TFF3/UBE2M/CXCL8/FASTK/MYC/CLDN7/LDHB/SERPINB2/AURKB/CLEC11A/MRPL49/LY6E/PPIB/PCNA/LY6G6C/NDUFV1/MRPS12/CDK2AP2/FBP1/ATP5F1D/COMMD4/PSMA4/RAC3/MT1X/ISG20/SAT1/HSPE1/IFITM1/PRSS23/ANXA3/KRT14/SLC9A3R1/APRT/SERPINB4/GFUS/CYP3A5/PTTG1/MT1A/GSTP1/NDUFS8…
Mitotic prometaphase	Mitotic prometaphase	202	-0.302723	-1.38329	0.00513099593477631	0.02797342968885455	0.02031822951615682	4807	tags=37%, list=26%, signal=28%	CENPE/NUP37/TUBGCP5/TUBB8/TUBG1/BUB1B/BUB3/OFD1/CEP41/BUB1/KIF2C/ITGB3BP/YWHAE/NCAPG/TUBA1B/CEP76/TUBA4A/TUBA3C/RAD21/RPS27/SEC13/TUBA1C/SEH1L/HAUS8/ZW10/PMF1/CENPI/NEK2/NUP85/SGO1/B9D2/CSNK2B/DYNLL1/TUBA8/CENPK/DCTN3/ERCC6L/NUF2/MIS12/CCNB1/HAUS4/TUBB4B/PLK4/MZT2B/CENPS/SKA1/PLK1/CENPA/NDC80/CEP57/SSNA1/HSP90AA1/CDCA5/PPP2R1B/KIF18A/CENPU/CENPN/PPP2R5C/SKA2/MZT2A/AURKB/ZWINT/CDK1/CCNB2/SPC25/CET…
Epigenetic regulation of gene expression	Epigenetic regulation of gene expression	145	-0.320275	-1.38652	0.009367755756350798	0.04403528983277309	0.03198460594873904	2572	tags=40%, list=14%, signal=35%	H3C3/DNMT1/DDX21/MTA2/SAP30BP/POLR2E/H3C6/H4C15/CHD4/RRP8/H4C6/H2BC8/H4C1/MNAT1/MBD2/H2AC20/H3-3B/H2BC17/POLR1G/H4C5/POLR1D/H3C2/GTF2H5/H3C1/H2BS1/POLR1C/MTA1/GTF2H2/H2BC15/EZH2/H4C14/POLR2H/POLR1H/SAP18/H2AB1/H3C13/H2BC5/H3C12/H2AC4/H2BC9/POLR2K/H4C3/H3C10/EED/TAF1D/H4C13/POLR2F/H4C9/H2BC12/H2AZ1/POLR2L/H3C4/RBBP7/H2AJ/H3C8/H2BC11/H2AX/H2AC8
Neddylation	Neddylation	233	-0.300069	-1.38803	0.006481923518229712	0.03342829826418366	0.024280320433387733	4613	tags=34%, list=25%, signal=26%	SKP1/FBXW5/PSMD8/COPS7A/CISH/KLHL22/KEAP1/CUL1/RPS27A/SENP8/COPS5/CUL5/KLHL2/RNF7/FBXL8/FBXL5/PSMC6/COMMD6/DCAF13/FBXO22/PSMC5/NUB1/PSMD10/FBXW12/SPSB2/PSMA8/UBA52/PSMC3/DCAF4/GPS1/COMMD1/PSMB4/PSMD12/PSMB7/FBXO6/UCHL3/PSMA6/COPS6/PSMA7/DDB2/RBX1/FBXL15/PSMB2/PSMA3/PSMC1/PSMA1/ANKRD9/COMMD8/ELOC/BTBD6/UBE2M/ASB10/ELOB/PSMD14/FBXO4/COMMD5/PSMB6/PSMA5/PSMB9/SEM1/NEDD8/PSMB10/PSMB5/COMMD4/FBXW9/PSMA…
Estradiol response 6hr up	Estradiol response 6hr up	226	-0.301051	-1.38905	0.004872837274218786	0.026850115119545652	0.019502320866701704	4193	tags=36%, list=22%, signal=28%	TPD52L1/NMRK1/MBOAT1/ENDOD1/RRS1/PIGW/GART/RFC3/GAB2/CCNE2/MCM4/CTPS1/AREG/ECE2/ABCE1/MCM6/WDR76/SLC27A2/EXOSC5/SEH1L/IFNAR2/NIP7/SEC14L2/ZNF367/KCNK6/ANXA9/CDC6/ISOC1/CA12/GLA/TMA16/GINS3/TICRR/RAPGEFL1/DPM2/SLC1A5/HSPD1/CD82/DKC1/XRCC2/NOP56/MOCOS/OSTF1/RPL32/LYAR/DDX10/NR2C2AP/FEN1/DNAJC12/BRI3BP/PAICS/IL17RB/CENPU/PLAAT3/PPAN/POLE2/MRPS23/MYC/PCNA/POLA2/PAX9/DSCC1/CHEK1/CDC45/NXNL2/ISG20/PRSS…
Liver cancer subclass proliferation up	Liver cancer subclass proliferation up	176	-0.319366	-1.41365	0.003893524592353803	0.02243785089463847	0.016297515513738106	4597	tags=39%, list=24%, signal=29%	MTMR2/RAD51AP1/BUB1B/E2F8/ELOVL7/KIF4A/HMGB2/KIF2C/TTK/BARD1/TUBA4A/KIF20A/PTP4A3/RFC4/TRIP13/PKM/SHCBP1/NEK2/CDC6/PAFAH1B3/FANCI/UBE2C/VEGFB/CDC7/CENPK/AURKA/SLC1A5/TAP1/NUF2/CCNB1/BACE2/RMI2/FDCSP/EZH2/SKA1/FEN1/AFP/TMED3/NDC80/CDCA5/DEPDC1/CEP55/DLGAP5/KIF23/ORC6/COLCA2/AURKB/OIP5/H4C3/ZWINT/CDK1/DEPDC1B/CCNB2/DSCC1/CCNA2/CDC20/CYBA/MCUB/PRC1/JPT1/MAD2L1/PBK/FUNDC1/BIRC5/PTTG1/CDCA7/CDKN3/ASRG…
Tumor invasiveness up	Tumor invasiveness up	382	-0.291408	-1.41499	4.972947082227922e-4	0.004424978129125778	0.0032140399740605884	5101	tags=40%, list=27%, signal=30%	UBE2K/CCT3/CD63/MOV10/WDR75/PMPCA/SRSF3/TXNDC9/GLIPR2/TEX10/CRELD2/ENO1/H3-3B/RPS15A/MKRN1/ARHGEF12/PSMC2/KRT19/RPL13A/RPS11/USP14/TACC3/NELFE/PSPH/ACTG1/ARPC3/TRIM28/STAT1/RPS7/POLR1D/HMGB2/HNRNPAB/CCT5/ANXA7/AK2/RPL7/TUBA1B/GAPDH/SYK/RPLP2/RPS14/KIF20A/RPLP0/RDX/CCDC47/RPS6/HSPA5/ABCE1/TKT/NDUFS4/STIP1/BAG1/PIGF/POLR1C/PKM/CLTA/AKR1A1/RPS8/PSMC5/COX7C/HSPA8/EIF2B3/EIF3H/SUB1/GTF3A/ATP5F1A/RPL34…
Deubiquitination	Deubiquitination	271	-0.296859	-1.41739	0.0019503528128434193	0.013100674956674442	0.009515548273736851	3305	tags=25%, list=18%, signal=21%	PSMD10/TAF10/PSMA8/UBA52/SMAD1/PSMC3/BRCC3/RCE1/OTUB1/PSMB4/INO80C/H2BC15/VDAC2/PSMD12/PSMB7/UFD1/CDC25A/UCHL3/TFPT/DDX58/PSMA6/PSMA7/RIPK2/DDB2/CCNA1/CLSPN/UCHL1/PSMB2/PSMA3/PSMC1/PSMA1/IFIH1/PSMD14/WDR20/MYC/H2AC11/H2BC5/H2AC4/CFTR/H2BC9/AR/PSMB6/PSMA5/CDK1/PSMB9/SEM1/NEDD8/PSMB10/PSMB5/USP28/CCNA2/H2BC12/PSMA4/CDC20/PSMB8/PSME1/PTRH2/USP18/H2AW/UBB/PSME2/PSMB3/H2BC11/H2AC8/USP26/TNIP3/H2AC17
Antigen response	Antigen response	356	-0.292652	-1.42049	4.710544394040992e-4	0.004220647777060729	0.0030656266033529935	4986	tags=38%, list=27%, signal=28%	ANLN/RNF227/MCM5/CHAF1A/RELL1/CDK2AP1/MS4A1/HASPIN/SP100/CA2/SERPINB6/PRIM1/KIF22/CDC25C/HAT1/GGH/ALCAM/PERP/RAD51AP1/TACC3/E2F8/MRPL18/CISH/BCL2A1/CARHSP1/DNA2/ABRACL/TRAPPC1/KIF4A/PGAM1/BUB1/DHRS1/HMGB2/KIF2C/TTK/GAPDH/GSTO1/KIF20A/MCM4/RAB11A/RAD21/TCF19/HMGN2/TRIP13/HPF1/CASP3/TCEAL9/ACOT7/CD68/S100A11/ANXA1/NEK2/CDC6/SYPL1/LGALS3/GCAT/ROM1/RAN/AURKA/TMEM37/NAPSA/RAD51/CCNB1/ASF1B/SLPI/EZH2/T…
Aging muscle dn	Aging muscle dn	163	-0.323223	-1.42376	0.0058662790452113645	0.030902934193178886	0.02244604671803509	3658	tags=32%, list=19%, signal=26%	PIGF/RPS18/IFI16/MARK3/CASP4/EIF2S1/EXOSC7/IMPDH1/RPL31/HSPA8/PTGR1/LGALS3/MPI/PABPC4/PSMC3/DYNLT1/SDHB/ATP5F1A/VDAC2/ZNF32/PSMA6/FH/KLK6/TMSB10/NDUFV2/ATP5F1C/FDFT1/ELOC/ATP5PF/PPP2R5C/DNTT/RPL36AL/SURF1/POLA2/POLR2F/POLR2G/COX6A1/PSMB8/HADH/TST/UQCRH/RAI2/DPP4/UBB/ATP5MC3/COX8A/RPS25/IRX5/TMSB4X/DRD3/TFPI2/PTPRR
Breast cancer luminal vs mesenchymal up	Breast cancer luminal vs mesenchymal up	441	-0.289794	-1.42925	1.7361467002855276e-4	0.0018870522784538055	0.0013706421318043641	4726	tags=32%, list=25%, signal=24%	MLPH/MYO5C/ARFIP2/KRT19/SLC35A1/SLC37A1/TSPAN13/MRFAP1L1/RERG/ARRDC1/TBC1D30/HOOK2/LLGL2/RNF103/TMEM183A/PRR15/ENSA/TPD52L1/MUC1/SLC44A2/RAB25/TRAF4/DOK7/SIGIRR/PAQR4/EPCAM/DNAJA4/GGT6/MPZL3/PRRG4/CCDC6/PGAP2/CYHR1/RAB17/ZNF165/BCAS1/TM7SF2/ZG16B/MARVELD3/ANXA9/PPCS/C4orf19/TMC4/PLEKHF2/TMEM30B/ELMO3/SORL1/CA12/PRSS8/PPDPF/CYB5A/RBM47/FLAD1/TMEM125/RHPN1/EOLA1/ESRP1/PDXDC1/CLDN3/HID1/TTC9/DEGS2/C…
Adipogenesis 6	Adipogenesis 6	191	-0.318684	-1.43031	0.003993787028208407	0.02296427541219834	0.01667987885958751	3907	tags=39%, list=21%, signal=31%	DECR1/BNIP3/TKT/CD151/NDUFA5/GCSH/DHCR7/LCN2/ACADS/SCP2/IMPDH1/DGAT1/DLD/FXN/ISOC1/SDHC/CYB5A/GSR/SDHB/DLST/C6orf136/HIBCH/NDUFB5/C11orf54/SUCLG1/NDUFA9/UQCRC1/DHRS7B/TUFM/C1QTNF12/PXMP2/ISCA1/DDT/MPDU1/APOC1/C20orf27/ATP5PO/NOCT/ME1/GRHPR/NDUFB6/CYRIB/NDUFB7/CBR1/CHCHD3/FAH/SLC25A1/QDPR/LDHB/CMBL/DLAT/COX5B/CAMP/NDUFS3/NDUFB8/NDUFB3/MRPL51/PLA2G12A/ATP5F1D/UQCRB/THRSP/HADH/NDUFB9/TST/COX7A2/SDHA…
Response to tsa and decitabine up	Response to tsa and decitabine up	130	-0.332418	-1.44102	0.005844989396079073	0.03088025993945334	0.022429577493616508	2552	tags=25%, list=14%, signal=22%	NMB/FAAH/HTATIP2/S100A3/VAMP8/H2AC18/SFN/PLAAT3/CYP24A1/BIK/COLEC11/PARD6A/CLDN7/NDUFA2/KRT23/H2BC5/SLC25A31/IL24/ISG20/SAT1/H3C4/HSD17B1/JPT1/CYP3A5/S100A2/MUC13/TAC1/IFI27/SSX4/SST/XAGE1B/MAGEB2/MAGEB1
Response to prostaglandin e2 up	Response to prostaglandin e2 up	141	-0.334099	-1.45291	0.005802266412631957	0.030754399750905187	0.02233816016559087	4962	tags=40%, list=26%, signal=30%	CHAF1A/FAM171B/CENPE/PRR11/TPD52/BUB1B/SLC16A1/TRIM28/BUB1/TTK/NCAPG/BARD1/GRINA/KIF20A/PTP4A3/MCM4/WDR76/MAP3K20/DGAT1/CDC6/UBE2C/EIF4EBP1/ATAD2/AURKA/CCNB1/RPS9/ASF1B/PIMREG/SKA3/MZT2B/RRM2/RBIS/PAICS/CENPU/DLGAP5/MZT2A/AP2S1/ASMTL/NOP16/RNASEH2A/CCNB2/PCBD1/TTLL6/DDIAS/CDC45/RPL8/PRC1/TK1/MTHFD2/UBE2S/AFAP1L1/BIRC5/PTTG1/BOLA3/PCLAF/CDKN3/CKS2
Intestine probiotics 24hr dn	Intestine probiotics 24hr dn	210	-0.318793	-1.46376	0.0017355428196428905	0.011985947194102108	0.008705876568125409	5089	tags=35%, list=27%, signal=26%	ALDH3B1/STX5/SARS1/ZNF282/HYOU1/FAM120A/MLPH/RPL13A/MAP2K2/RPS11/ACTG1/TANK/FTH1/RPL4/EIF1/RPS7/MTDH/RPL37A/LARP6/MCTP2/RPS14/RPL3/RPLP0/RPL13/RPS6/HSPA5/RPS27/P4HB/RPS18/RPS3A/RPS2/PRSS3/HSPA8/CDC6/MTA1/GOT1/GOLGA5/RPL41/AUH/RPL34/NUCB2/ESRP1/ST6GALNAC4/RPL27A/PDIA4/WARS1/ASNS/RPS24/SLC1A5/RPL10/HKDC1/RPL12/RPS19/SLC6A8/RPL23A/RPL23/SLC3A2/CEP57/LAMP3/RPL39/PPIB/PCK2/CDK2AP2/MANF/NQO1/CTAGE9/EIF…
Liver cancer subclass s3	Liver cancer subclass s3	265	-0.308712	-1.46609	7.19221256370659e-4	0.0059381857577269805	0.004313143668012302	3389	tags=30%, list=18%, signal=25%	BPHL/CD81/PTGR1/GOT2/POLD4/SORL1/SLC7A2/MTHFD1/CYB5A/SDHB/PGRMC1/MT2A/PCK1/RGN/IDH3A/FH/PCCB/SLPI/TMOD1/NDUFV2/SLC23A1/ADK/ATOX1/CXCL2/PPP2R1B/CBR1/EMP2/ATP5PF/ECHS1/HSD17B10/SERPINA3/CGREF1/CYP2J2/FAH/QDPR/ASS1/MSMO1/COX5B/PON3/MTHFS/ECI1/PCK2/C8B/SOD1/GPX2/AOC1/ATP5F1D/UQCRB/CYP3A7/CRYM/IDH2/HADH/RIDA/DPAGT1/TST/ACY1/HGD/BLOC1S1/CRYAA/IFIT1/APOA1/GJB1/GSTZ1/PNPLA4/GPT/TDO2/PTS/FGB/MGST2/ISG15/H…
Oxidative stress induced senescence	Oxidative stress induced senescence	121	-0.341451	-1.46882	0.00851162208842155	0.0410982914709914	0.029851345656132407	1876	tags=20%, list=10%, signal=18%	CDKN2D/H2AB1/H3C13/TXN/H2BC5/H3C12/H2AC4/H2BC9/H4C3/H3C10/EED/H4C13/H4C9/H2BC12/H2AZ1/H3C4/RBBP7/H2AJ/UBB/H3C8/H2BC11/H2AX/H2AC8/IFNB1
Liver specific genes	Liver specific genes	242	-0.315237	-1.47317	9.97986004148646e-4	0.007697041756547641	0.005590671674674499	2340	tags=24%, list=12%, signal=21%	DHCR24/FMO3/LIPC/CYP3A4/SERPINA1/SC5D/GSTA1/SERPINA3/CYP2J2/FAH/ASS1/MSMO1/PON3/PCK2/C8B/SOD1/FBP1/CYP3A7/PCBD1/ACAT1/DPYS/FGL1/RIDA/TST/FCN2/HGD/F13B/CFI/ITIH2/AHSG/APOA1/PRDX4/GJB1/GSTZ1/GPT/TDO2/UGT2B7/F12/FGB/AADAC/MGST2/CYP2B6/TM4SF4/SERPINA5/HMGCS2/HABP2/CYP4A11/AZGP1/APCS/HRG/SERPINA6/APOH/AFM/UGT2B15/C4BPA/AKR1C4/FGA
Xprss int network	Xprss int network	167	-0.331513	-1.4757	0.004066834514104806	0.02333221761321599	0.016947130110939616	5893	tags=44%, list=31%, signal=31%	RNASEH2B/DHFR/SNRPA/DNMT1/LMNB1/RAD51C/PNN/ASF1A/CD47/FRG1/CPSF4/HMGN4/TFDP1/USP1/FOXM1/UNG/COPS3/MCM5/CHAF1A/SRSF3/SKP2/EXOSC8/MRE11/RAD51AP1/RBBP8/BUB3/METAP1/PAXIP1/DNA2/DNAJC9/HMGB2/RFC3/MCM4/LARP7/RAD54L/RAD21/ZNF330/MCM6/RFC4/ZNHIT3/DDX39A/CHEK2/MYBL2/EIF3H/FANCI/HMGN1/UBE2C/PRPF4/GINS1/CDC7/AURKA/EZH2/PLK4/HMMR/CENPA/NDC80/CEP57/PAICS/TBCA/PPP2R5C/SNRPB/AURKB/ACYP1/DUT/PCNA/ZWINT/CDK1/SPC2…
Tp53 regulates metabolic genes	Tp53 regulates metabolic genes	87	-0.365205	-1.47893	0.010735639263452428	0.04873128941436732	0.035395499727867735	4747	tags=44%, list=25%, signal=33%	MLST8/YWHAZ/MT-CO3/PRKAG1/COX7A2L/COX16/YWHAE/YWHAH/PRKAG2/COX6B1/COX7C/GSR/NDUFA4/PRDX1/AKT1/CYCS/COX18/MT-CO2/SFN/TACO1/TXN/LAMTOR2/COX4I1/COX5B/COX14/LAMTOR5/SURF1/PRDX2/RHEB/PRDX5/GPX2/LAMTOR1/COX6A1/COX5A/LAMTOR4/COX6C/COX8A/COX7B
Adult t cell leukemia	Adult t cell leukemia	163	-0.336677	-1.48303	0.002632229473632875	0.01641254182600724	0.011921090673311489	4250	tags=36%, list=23%, signal=28%	NDUFAF1/HMGB2/KIF2C/GLB1/BARD1/BATF/RFC3/SCCPDH/ACOT13/IFI16/ZNF80/CADM1/CD99/OAS2/VBP1/IDH1/DYNLL1/UBA52/LPCAT4/UBE2C/ATP5F1A/TFRC/CCNB1/PRDX1/POLR2H/PLK1/MYCBP/PSMB2/DHCR24/TMED3/LSM2/CHMP2A/DLGAP5/MTX2/NMI/ACYP1/PPP1CA/PPIB/PCNA/H4C3/ZWINT/ETFA/CCNB2/MRPS12/HINT1/TYMS/CCNA2/ISG20/TK1/ATP5MC3/DOK5/PRDX4/PTTG1/GSTZ1/PCLAF/CDKN3/NME1/RLN2/ISG15
Blebbishield vs live control dn	Blebbishield vs live control dn	272	-0.311002	-1.48347	7.045266664679408e-4	0.005844961973659952	0.004245431476046326	4257	tags=35%, list=23%, signal=27%	RPS7/SETMAR/HLA-B/ENSA/PYCARD/ACOT4/FAM210B/SP110/SMAD6/REPIN1/KIF20A/IRF9/LCN2/SLC4A4/TRNT1/HLA-A/EGFL6/CASP4/SRI/AP1S1/NMRAL1/OAS2/SYPL1/GBP4/SUB1/SORL1/CA12/PRSS8/TAGLN2/SLC7A2/PSMB4/LDOC1/SQOR/S100A9/OAS1/TPK1/MST1R/RPL14/PET100/CCNB1/TCEAL8/RPS9/OASL/SERPINB1/RPL23A/RAB27B/RPL15/TMSB10/HOXD1/IFIT2/HMMR/METTL1/IFITM3/MGST3/IMMP2L/CXCL1/TSPAN3/SAMD9/IFI35/RPL22L1/C15orf48/RPS29/IFI44L/ASS1/STA…
Head and neck cancer e	Head and neck cancer e	85	-0.370227	-1.49067	0.008524873782208994	0.041123735698446386	0.029869826824120815	2303	tags=31%, list=12%, signal=27%	FMO3/ALDH3A1/GSTA1/NTS/SLURP2/ENDOU/UPK1B/VNN1/TMPRSS11B/PAX9/GDA/A2ML1/VTCN1/NPR3/C10orf99/TGM3/AADAC/CRNN/TMEM45B/ST6GALNAC1/CCDC190/CXCL17/CEL/CEACAM7/SLC7A11/ADH7
Blebbishield to immune cell fusion pbshms dn	Blebbishield to immune cell fusion pbshms dn	378	-0.308908	-1.49757	3.983406015299499e-5	5.576768421419299e-4	4.0506316888986617e-4	3740	tags=31%, list=20%, signal=26%	IRF9/NIPSNAP2/PDCL3/ELP4/LCN2/IDI1/IFI16/MID1IP1/EGFL6/LMO4/IMPDH1/ZG16B/OAS2/C17orf58/CA12/PRSS8/FAM162A/MRPL47/APOBEC3G/IL4I1/FAM3B/RAPGEFL1/MYG1/LRRC26/S100A9/OAS1/CTSC/RAB38/SORD/IRX3/PADI3/INSIG1/TCEAL8/SLPI/DPY30/AKR1B1/HOXD1/APOC1/OVOL2/IFITM3/PBDC1/CXCL1/LAMP3/TSPAN3/SPTSSA/IFI35/C15orf48/YBEY/AKR1C3/ELF5/ATP5PF/DBI/MTX2/CXCL8/APOBEC3F/IFI44L/TNFAIP2/ASS1/CKB/PLEKHS1/PRDX2/PIGP/IFI44/RHOV…
Dna double strand break repair	Dna double strand break repair	166	-0.338078	-1.49789	0.0033786495775459426	0.020128815168004594	0.01462036979451135	4749	tags=37%, list=25%, signal=28%	SIRT6/H2BC17/H4C5/MRE11/RAD51AP1/RBBP8/PAXIP1/DNA2/RPS27A/BABAM1/BARD1/RFC3/RAD1/EYA2/H2BS1/SLX1B/RFC4/PPP4C/UBE2N/CHEK2/SUMO1/POLD4/ATRIP/MUS81/RHNO1/UBA52/BRCC3/H2BC15/RAD51/RMI2/PARP2/XRCC2/SUMO2/POLD2/H4C14/POLE3/CCNA1/RFC2/CLSPN/FEN1/TIPIN/POLD3/POLE2/RPA3/TDP1/H2BC5/RMI1/SLX1A/H2BC9/PCNA/H4C3/CCNA2/H4C13/H4C9/H2BC12/CHEK1/KPNA2/XRCC3/POLE4/UBB/H2BC11/H2AX
Retinoblastoma gene in cancer	Retinoblastoma gene in cancer	87	-0.370505	-1.50039	0.009145190318768035	0.043249108698020976	0.03141357090173761	5261	tags=54%, list=28%, signal=39%	FAF1/SUV39H1/DHFR/MCM7/DNMT1/E2F1/NPAT/TFDP1/ANLN/MAPK13/SKP2/PRIM1/RABIF/KIF4A/HMGB2/TTK/BARD1/RFC3/CCNE2/CDK4/MCM4/MCM6/RFC4/CCDC6/FANCG/DCK/ORC1/CDC7/CDC25A/CCNB1/PLK4/RRM2/RBP1/POLD3/CDT1/POLE2/MYC/RPA3/PCNA/CDK1/CCNB2/TYMS/CCNA2/CHEK1/H2AZ1/CDC45/RBBP7
Normal tissue adjacent to liver tumor dn	Normal tissue adjacent to liver tumor dn	352	-0.311323	-1.50045	9.400938933110207e-5	0.0011502389293806421	8.35464897423215e-4	3550	tags=30%, list=19%, signal=25%	CADM1/UBAC1/TM7SF2/ADI1/CLPP/UROD/MEA1/BPHL/DGAT1/ZNHIT1/GOT2/ATP6V0E2/SLC19A3/ENTR1/DESI1/PGRMC2/GTF3A/SDHB/PSMB4/TMEM160/FN3KRP/CLDN3/VPS26B/PSMB7/SRPRB/AHCY/RPL12/AGPAT2/OAZ1/NPRL2/MRPL22/SLC35B1/TUBB4B/THOP1/ABHD14B/DGAT2/CBS/POLE3/MOCOS/ANGPTL3/ATP5PO/NOCT/TRAPPC6A/FMO3/TECR/CAPN5/MAGOH/PSMA3/SAP18/MYDGF/SPTSSA/SNRPF/SEC11A/MYOM2/PNP/F8A1/NUDT2/PLAAT3/ZNF511/TFF3/GSTA1/CNDP2/VPS28/SLC25A1/RP…
Abc family proteins mediated transport	Abc family proteins mediated transport	103	-0.360404	-1.50955	0.007520836229818167	0.03740091530504169	0.027165792315589906	3581	tags=36%, list=19%, signal=29%	PSMC6/EIF2S1/PSMC5/PSMD10/PSMA8/UBA52/PSMC3/PSMB4/EIF2S3/PSMD12/PSMB7/PSMA6/PSMA7/ABCA12/DERL1/PSMB2/PSMA3/PSMC1/PSMA1/DERL3/PSMD14/CFTR/ABCG5/PSMB6/PSMA5/PSMB9/SEM1/PSMB10/PSMB5/PSMA4/PSMB8/PSME1/UBB/PSME2/PSMB3/APOA1/ABCG8
Response to salirasib dn	Response to salirasib dn	339	-0.313306	-1.51068	1.0644946129413108e-4	0.0012695083902485261	9.220951142803022e-4	4981	tags=42%, list=27%, signal=32%	CRIP2/MCM5/CHAF1A/SRSF3/SKP2/CDK2AP1/ENO1/STIL/MACROH2A1/FNTB/NME4/LSM5/PRIM1/KIF22/CDC25C/BFSP1/MRE11/TUBG1/RAD51AP1/TACC3/BUB1B/TROAP/CARHSP1/KIF4A/PGAM1/BUB1/SETMAR/KIF2C/TTK/SKAP1/ITGB3BP/LDHA/NCAPG/ZNF443/BARD1/SRSF2/RFC3/CCNE2/VAMP1/NARF/KIF20A/GAMT/MCM6/RFC4/TRIP13/SLC27A2/HMG20B/PKM/UBE2N/DDX39A/DCK/MATN2/MYBL2/NEK2/CDC6/PAFAH1B3/MTHFD1/CYB5A/UBE2C/DTYMK/ORC1/CDC7/AURKA/CCL2/CDC25A/PIK3R3…
Graft versus host disease d7 up	Graft versus host disease d7 up	115	-0.352876	-1.51174	0.006003080038973913	0.031367006451109125	0.022783121104464888	3611	tags=31%, list=19%, signal=25%	IRF7/IFI16/PKM/GBP4/CLIC1/TAP2/WARS1/CCL2/TAP1/CCL7/TMSB10/IRF1/CXCL2/IFI35/LGALS3BP/TFF3/ITPK1/SERPINA3/C8orf33/PSMB9/PSMB10/PSMB8/PSME1/CYBA/USP18/IFIT3/CRYAA/CD5L/PSME2/MT1A/TMSB4X/ZIC3/CXCL10/ISG15/SERPINA10/IFI27
Wtap targets dn	Wtap targets dn	312	-0.312983	-1.51282	1.607449244424011e-4	0.0017771627698009666	0.0012908249523215177	5050	tags=43%, list=27%, signal=32%	STYX/FOXM1/UNG/CMPK1/ANLN/CRIP2/TDP2/LIN7C/STUB1/ARL6IP6/TMEM123/GSPT1/PRR11/KIF22/RPL13A/CXADR/RAD51AP1/BUB1B/TROAP/BUB3/PI4K2B/KIF4A/TFB2M/BUB1/CCT7/FDPS/TOR3A/HMGB2/KIF2C/TTK/CCDC86/LDHA/NCAPG/CHRNA1/ITPRID2/RPL3/KIF20A/FAM83D/RPL13/BCAP29/PAPOLA/TRIP13/ST8SIA4/APOBEC3B/EBPL/MYBL2/NEK2/RPL7A/NAA15/PGRMC2/C12orf57/IMPDH2/GSR/UBE2C/PPIA/ENY2/MRPL48/SRPRB/AURKA/ARF6/NUF2/CCNB1/ASF1B/PGK1/PIMREG/T…
All disorders duration corr dn	All disorders duration corr dn	144	-0.347738	-1.5137	0.003495082451859486	0.020602591295171706	0.014964492492304558	3509	tags=36%, list=19%, signal=30%	ACOT7/CLTA/AKR1A1/RPS8/PAK6/COX7C/ATP6V0E2/PAFAH1B3/RUVBL2/IMPDH2/SUCLG1/PPIA/TUFM/CREB3/KLK6/SPAG7/AKR1B1/PIN1/GRHPR/ATOX1/TPI1/MRPL23/PES1/NDUFAF3/PUF60/CHMP2A/PLAAT3/SLC25A11/ETFB/RPS29/BCAP31/VPS28/CKB/COX4I1/GPX1/ENDOG/AHSA1/ECI1/PSMB5/UQCRB/ATP6V0B/NDUFA1/SAC3D1/NDUFC1/UQCRQ/COX8A/DCXR/ATP5MC1/NDUFS8/NDUFB1/NRGN/ACTL6B
Malignant mesothelioma up	Malignant mesothelioma up	309	-0.313543	-1.51399	4.1879491936877425e-4	0.0038529132581927228	0.0027985261999172797	5170	tags=38%, list=28%, signal=28%	TFDP1/TRIAP1/UBE2D2/CCT3/RAP1A/FKBP1A/SRSF3/AZIN1/MACROH2A1/RPS15A/PARVB/NUDT1/MORF4L2/YWHAZ/PIGC/SKP1/PSMD8/BUB1B/COA1/BUB3/SRPK1/MRPL3/MACIR/USP9X/TMEM183A/DNAJA1/CCT5/LYPLA1/RAD1/COPS5/CCNE2/TUBA3C/SRD5A1/CDK4/RAD21/ILF2/MCM6/SCCPDH/PAPOLA/STIP1/RFC4/TAF12/PPP4C/BLVRA/METTL18/KRT10/VDAC1/RCOR1/PKM/UBE2N/S100A11/EIF3I/EMG1/DCK/BPHL/HSPA8/PARK7/HNRNPC/PSMD10/VBP1/EIF3H/RAN/UBE2C/SDHB/ATP5F1A/URO…
Brca centered network	Brca centered network	118	-0.352713	-1.51464	0.008641568012328616	0.04156989579786837	0.0301938908878355	6190	tags=49%, list=33%, signal=33%	CNOT9/TAF11/NASP/BLM/RNASEH2B/DHFR/SNRPA/DNMT1/LMNB1/RAD51C/ASF1A/CPSF4/TFDP1/UNG/COPS3/MCM5/CHAF1A/SKP2/MRE11/RAD51AP1/RBBP8/BUB3/METAP1/DNA2/HMGB2/RFC3/RAD1/MCM4/RAD54L/RAD21/ZNF330/MCM6/RFC4/ZNHIT3/DDX39A/CHEK2/MYBL2/EIF3H/FANCI/UBE2C/PRPF4/GINS1/CDC7/AURKA/EZH2/HMMR/NDC80/PAICS/TBCA/PPP2R5C/SNRPB/DUT/PCNA/CDK1/CCNA2/CDC20/MAD2L1/SNRPA1
Kdm1a targets up	Kdm1a targets up	251	-0.321938	-1.51603	4.785133072544252e-4	0.004280035692664581	0.003108762440222006	2096	tags=24%, list=11%, signal=22%	GSTM1/MYOM2/LGALS3BP/TNFRSF17/CFAP206/ITGAE/CYP2J2/TSPAN8/BRDT/KRT23/SLC16A9/CHI3L1/KLK1/CPN1/SLC15A2/LY6E/BARX2/C8B/CELA1/XK/CCL25/TAF1D/PDE6A/CRYGD/TIMM8A/MX1/VWA5A/SLC6A13/FGL1/UBE2L6/TST/AGMAT/GPHA2/IFITM1/TPH2/GTSF1/SH3RF2/GMPR/FAM9B/KCNU1/GSTA3/FMR1NB/MT1A/KISS1/NRG4/MT3/QPCT/MGST2/FETUB/SRD5A2/TEX19/TEKT1/MOGAT2/BFSP2/FAM9C/DCSTAMP/PNLIP/IFI27/CRABP1/AQP9/NLRP4
Emt breast tumor dn	Emt breast tumor dn	122	-0.352057	-1.51856	0.004671999878958618	0.026049938719041994	0.018921120494073695	4630	tags=37%, list=25%, signal=28%	TMEM54/KIF21A/CXADR/TNK1/BCL11A/EPB41L4B/ELOVL7/LLGL2/RAB25/POF1B/CLDN1/EPCAM/C1orf210/TMC4/TMEM30B/ELMO3/PRSS8/C1orf56/ESRP1/CLDN3/CEACAM1/MAL2/DENND2D/PKP3/APOC1/CHDH/TFAP2C/NIPAL2/ST14/ELF5/BSPRY/CLDN7/ENDOU/STAP2/TMPRSS13/THRSP/EHF/CALML3/AP1M2/STARD10/PPIF/EPHA1/MPZL2/ATP6V1C2/LTF
Cell cycle g1 s	Cell cycle g1 s	124	-0.35429	-1.51863	0.004172707259220921	0.023859919866266576	0.017330421527577983	5041	tags=40%, list=27%, signal=29%	UNG/OSBPL6/MCM5/CHAF1A/SKP2/PLCXD1/CDK20/APEX2/MBOAT1/BARD1/CCNE2/MCM4/MCM6/WDR76/CREBZF/SPIN4/FANCG/ZNF367/TRMT2A/SERPINB3/CDC6/RNF113A/ZMYND19/GINS3/FLAD1/ORC1/ATAD2/CDC25A/ORMDL1/RMI2/CLSPN/CHAF1B/TIPIN/POLD3/UBR7/RECQL4/ADCK2/SLBP/ACYP1/PCNA/MED31/DSCC1/FAM111B/GMNN/GINS2/GON7/CDCA7/USP53/MNX1
Nucleotide excision repair in xeroderma pigmentosum	Nucleotide excision repair in xeroderma pigmentosum	75	-0.385864	-1.51988	0.008466749139388031	0.04099689056966836	0.029777694094305952	5720	tags=43%, list=30%, signal=30%	RAD23A/XPA/H4C15/GTF2H2C/H4C6/H4C1/MNAT1/RAD23B/H3-3B/H4C5/GTF2H5/RFC3/RFC4/POLD4/GTF2H2/HMGN1/GPS1/DDB2/POLD2/H4C14/POLE3/RFC2/RBX1/POLD3/POLE2/RPA3/PCNA/H4C3/H4C13/H4C9/CETN2/POLE4
Trna processing	Trna processing	108	-0.358855	-1.52174	0.005623282901745039	0.03015936705929572	0.021905963937519677	6355	tags=55%, list=34%, signal=36%	TRMT44/WDR4/PRORP/ADAT3/TRMT1/NSUN2/TRMT5/TYW5/ALKBH8/PUS1/CPSF1/NDC1/TRMU/CPSF4/LCMT2/NUP88/POP1/TRMT10C/RPP14/CTU2/NUP37/CLP1/TRMT10A/RTCB/CSTF2/TRIT1/RPP30/THG1L/RPP25/URM1/POP5/NUP54/NUP205/RPP21/SEC13/SEH1L/TRNT1/OSGEP/QTRT1/ZBTB8OS/RTRAF/NUP85/DUS2/RAN/NUP35/CTU1/RPP40/TSEN54/TRMT61A/METTL1/PUS3/TPRKB/TSEN34/RPP38/TRMT12/HSD17B10/LAGE3/POP7/TRMT112
Interferon induced antiviral module	Interferon induced antiviral module	75	-0.387137	-1.52489	0.008357502288972569	0.04058232968217406	0.02947658181189294	4157	tags=43%, list=22%, signal=33%	ARAP2/SAMD9L/IFIT5/SLC25A28/TDRD7/IRF7/PTPN2/NUB1/OAS2/GBP4/APOBEC3G/CCL2/DDX60/SLC39A8/OASL/PARP12/IFITM3/LAMP3/RSAD2/IFI35/IFIH1/CYP24A1/IFI44L/IFI44/CDK1/MX1/IFIT3/APOL1/IFIT1/ZBP1/IFI6/TNIP3
Breast cancer basal vs mesenchymal up	Breast cancer basal vs mesenchymal up	120	-0.354557	-1.52682	0.00677478702076989	0.03442179756509514	0.025001939020904144	3751	tags=33%, list=20%, signal=27%	MPZL3/PRRG4/EMC10/LCN2/ZNF165/DRAM2/TMEM30B/ELMO3/PRSS8/ITPA/WDR61/ESRP1/KRT5/KLK6/MAL2/SLPI/PKP3/ENTPD2/OVOL2/ST14/SYTL1/SERPINA3/BSPRY/LAD1/COX5B/RHOD/KLK5/TC2N/EHF/TSTD1/PDZK1IP1/APRT/DMAC1/S100A14/TMEM134/EPHA1/S100A8/AKR1B10/FGFBP1/TLCD1
Integrated tgfb emt dn	Integrated tgfb emt dn	74	-0.387665	-1.5271	0.010838212623818382	0.04905758877180686	0.03563250410341889	4723	tags=46%, list=25%, signal=35%	TBC1D8/MYO5C/KRT19/CXADR/EPB41L4B/PKP2/ATP8B1/RAB25/AREG/EPCAM/SLC27A2/LCN2/FOXA2/TMEM30B/CYB5A/RBM47/ESRP1/SERPINB1/SLPI/GRTP1/CD9/FA2H/LY6E/EHF/IMPA2/MPZL2/DEPTOR/PLAAT4/DEFB1/FGFBP1/AGR2/HPGD/MMP7/SOX2
Dna replication genes	Dna replication genes	144	-0.351597	-1.5305	0.00307356876140821	0.018607551420417274	0.01351541461661969	4113	tags=33%, list=22%, signal=26%	RPA4/RFC3/REPIN1/TMX1/MCM4/PNKP/MCM6/RFC4/TFAM/S100A11/POLD4/CDC6/ORC1/CHRAC1/PPIA/CDC7/ABCF2/CCL2/PPP2R3B/POLD2/UBE2A/POLE3/RFC2/RRM2/FEN1/CHAF1B/POLD3/PPP2R1B/CXCL8/ORC6/POLE2/DNTT/RPA3/LAMTOR5/DUT/PCNA/POLA2/EIF5A/GMNN/CDC45/CLEC4M/SSBP1/PTTG2/NT5M/EGF/POLE4/PTTG1/GINS2
Egr2 targets up	Egr2 targets up	110	-0.359499	-1.5307	0.00427422229303157	0.02438626052458322	0.017712723963078898	2974	tags=32%, list=16%, signal=27%	CDC7/AURKA/CCL2/RAD51/CCNB1/EZH2/PLK4/RRM2/PLK1/LSM2/NHP2/KIF23/CXCR4/RPA3/CKS1B/H2AC4/CDK1/CCNB2/TMX2/CCNA2/CHL1/PPP1R14B/UBE2T/H2AZ1/KPNA2/CDCA8/CDC20/PRC1/JPT1/MAD2L1/BIRC5/H2AX/PCLAF/CKS2/SOX2
Breast cancer classes up	Breast cancer classes up	68	-0.40009	-1.53568	0.007644897499455474	0.03787164607422558	0.02750770304712977	2630	tags=28%, list=14%, signal=24%	PBLD/ABCA12/FA2H/TFF3/FAM174B/AR/TOX3/HGD/SPDEF/DCXR/ALDH3B2/DHRS2/CRISP3/AGR2/PIP/HMGCS2/LRRC31/AZGP1/TFAP2B
Uv response via ercc3 up	Uv response via ercc3 up	308	-0.321679	-1.54788	1.1699462988556558e-4	0.0013699007572055314	9.950141369454203e-4	4741	tags=38%, list=25%, signal=29%	TRIM21/RSL1D1/ACAA1/EFNA1/RELA/PSMD8/RBM4/SULT1A2/TP53I3/TNFSF13/PKMYT1/RNF103/HLA-F/MED6/AMACR/CLTB/CZIB/CTH/EPHX1/MICB/BSG/CCNE2/GRINA/TUBA4A/TMED1/PAQR4/MCM4/ZNF330/CREBZF/BUD23/BAG1/CASP3/HLA-A/CBR3/RPUSD2/TFAM/TM7SF2/HHEX/UROD/EIF3I/MEA1/MYBL2/DGAT1/ZNHIT1/CDC6/GCAT/PAFAH1B3/ACOT2/RNF113A/PSMC3/UROS/PRPF4/EIF4EBP1/EIF2S3/PHLDA2/UQCRC1/SLC1A5/ZFPL1/TEX30/AGPAT2/SLC6A8/FDXR/ARPC4/DDT/NPRL2/MPD…
Nasopharyngeal carcinoma with lmp1 dn	Nasopharyngeal carcinoma with lmp1 dn	163	-0.351568	-1.54862	7.225280986596089e-4	0.005955943622870888	0.004326041921237742	2259	tags=28%, list=12%, signal=24%	ARSD/SPRR2A/EFHB/SERPINA1/ELF5/GSTA1/SERPINA3/NTS/ASS1/KRT23/MFAP3L/UPK1B/RAB40B/HRCT1/NQO1/SLC6A13/GRIN2A/CR2/PDZK1IP1/KRT14/CXCL5/SERPINB4/GDA/FAM81B/SPRR1B/SLC6A14/CRABP2/AADAC/GLYATL2/ANPEP/S100A8/CCDC190/DEFB1/CXCL17/ST6GALNAC5/CHI3L2/OLFM4/SPRR1A/C9orf24/C20orf85/SCGB3A1/SNTN/GC/MMP7/S100A7
Breast cancer metastasis dn	Breast cancer metastasis dn	109	-0.365941	-1.55171	0.003948574650002092	0.022729672175207574	0.016509477072340416	6001	tags=56%, list=32%, signal=38%	DIAPH3/INTS7/NUSAP1/EXT1/STK3/GPSM2/ARMC1/PITRM1/ADGRG6/HJURP/ECT2/CDK16/PFKP/TMEM74B/PSMD7/PRAME/UCHL5/GGH/KIF21A/MTMR2/BUB1/PTDSS1/MTDH/CCNE2/CTPS1/RAD21/BNIP3/MCM6/RFC4/TRIP13/DCK/TFRC/ATAD2/AURKA/ASNS/PGK1/PLAAT1/PIMREG/EZH2/NMB/MELK/CA9/CENPA/NDC80/DEPDC1/CENPN/DLGAP5/ORC6/CCNB2/SPC25/HMGB3/CMC2/MRPL13/PRC1/TK1/MAD2L1/BIRC5/NMU/CTSV/CKS2/PIR
Diamond blackfan anemia myeloid dn	Diamond blackfan anemia myeloid dn	37	-0.466365	-1.55354	0.00959988817629427	0.04475893564187157	0.032510219068088715	3994	tags=38%, list=21%, signal=30%	RPS14/DNAJA4/RPL36/UROD/RPL10L/POLR2I/DCTN3/PXMP2/MRPL23/PHB/COX5B/LSM7/RPL28/PNPLA4
Dna damage recognition in gg ner	Dna damage recognition in gg ner	38	-0.458951	-1.55568	0.010814750269487326	0.04900403991943598	0.0355936094135328	5100	tags=58%, list=27%, signal=42%	ACTL6A/COPS2/INO80E/RUVBL1/RAD23A/COPS4/COPS3/RAD23B/YY1/COPS7A/RPS27A/COPS5/UBA52/GPS1/INO80C/TFPT/PARP2/COPS6/DDB2/RBX1/CETN2/UBB
Meiosis	Meiosis	116	-0.362118	-1.55668	0.0037559656046361107	0.02188997148765299	0.015899568616910425	1995	tags=22%, list=11%, signal=19%	MND1/H2AB1/H3C13/RPA3/H2BC5/H3C12/H2AC4/H2BC9/H4C3/H3C10/REC8/H4C13/H4C9/H2BC12/H2AZ1/SYCE3/SYCE2/H3C4/H2AJ/H3C8/H2BC11/FKBP6/H2AX/H2AC8/DMC1
Mitotic g2 g2 m phases	Mitotic g2 g2 m phases	200	-0.341134	-1.5574	2.6962497457702037e-4	0.002739857729824081	0.0019900691054112064	4709	tags=39%, list=25%, signal=30%	LCMT1/PSMC2/TUBGCP5/CDC25C/TUBB8/SKP1/TUBG1/PSMD8/OFD1/PKMYT1/CEP41/CUL1/RPS27A/YWHAE/TUBA1B/CEP76/TUBA4A/TUBA3C/TUBA1C/PPME1/HAUS8/PSMC6/PSMC5/MYBL2/NEK2/PSMD10/PSMA8/DYNLL1/UBA52/TUBA8/PSMC3/PSMB4/PSMD12/PSMB7/AURKA/DCTN3/CDC25A/CCNB1/PPP2R3B/PSMA6/HAUS4/PSMA7/TUBB4B/PLK4/CCNA1/MZT2B/HMMR/PLK1/RBX1/PSMB2/CEP57/SSNA1/PSMA3/HSP90AA1/PPP2R1B/PSMC1/FKBPL/PSMA1/MZT2A/PSMD14/PSMB6/PSMA5/CDK1/PSMB9/CC…
Fanconi pathway	Fanconi pathway	46	-0.443444	-1.56126	0.007621889315852634	0.03779400746417013	0.027451310995244536	4738	tags=35%, list=25%, signal=26%	HES1/MRE11/RFC3/RAD1/RFC4/FANCG/ATRIP/FANCI/CENPS/RFC2/FANCB/RMI1/UBE2T/CHEK1/XRCC3/H2AX
Response to fenretinide dn	Response to fenretinide dn	56	-0.425881	-1.56561	0.010512845841474994	0.048015338444446776	0.034875475680371096	2853	tags=36%, list=15%, signal=30%	ASNS/PGK1/ATP5PO/IFITM3/SLC3A1/UBALD2/TFF3/MTX2/SIGMAR1/MDH2/SERPINB2/NDUFA2/PPIH/H4C3/H2AZ1/UQCR10/BANF1/NDUFC1/ATP5MF/TMSB4X
Rapamycin sensitive via tsc1 and tsc2	Rapamycin sensitive via tsc1 and tsc2	69	-0.404176	-1.5666	0.0065779254189155915	0.03382182810204903	0.02456615701675064	6472	tags=68%, list=34%, signal=45%	ACBD6/UQCRFS1/SLC25A3/RPL35A/GYG1/RPS28/AIMP1/PPM1G/EIF3E/ATP6V1G2/SLC25A17/KDELR1/BLVRB/EIF3K/RPL36A/SERPINB6/CRYZ/TSPAN15/BCS1L/PSAT1/IGBP1/RPL3/RPL10A/VDAC1/POLR1C/RPL36/RPL31/HSPA8/RTRAF/OLA1/IMPDH2/ATP5F1A/EIF2S3/AHCY/RPH3AL/BRI3BP/PAICS/CNIH1/RPS21/GTPBP6/PRDX3/PRCP/PPIB/NAA10/RPS26/SLC25A5/SSR4
Atr pathway	Atr pathway	38	-0.462235	-1.56681	0.009549626981653986	0.04468635623022828	0.03245750171593281	4689	tags=42%, list=25%, signal=32%	CDC25C/YWHAZ/RFC3/RAD1/RFC4/CDC6/ATRIP/CDC25A/RAD51/RFC2/CLSPN/PLK1/TIPIN/CCNA2/CHEK1/PPP2R2B
Regulation of runx2 expression and activity	Regulation of runx2 expression and activity	73	-0.39954	-1.56754	0.007329901439028737	0.0366637400134719	0.026630352187784527	5239	tags=56%, list=28%, signal=41%	PSMD4/PSMD6/PSMD7/STUB1/SKP2/PSMC2/SKP1/PSMD8/STAT1/CUL1/RPS27A/PSMC6/PSMC5/PSMD10/PSMA8/UBA52/PSMC3/PSMB4/PSMD12/PSMB7/PSMA6/PSMA7/RBX1/PSMB2/PSMA3/ESRRA/PSMC1/PSMA1/PSMD14/PSMB6/PSMA5/PSMB9/SEM1/PSMB10/PSMB5/PSMA4/PSMB8/PSME1/UBB/PSME2/PSMB3
Ybx1 targets up	Ybx1 targets up	327	-0.324521	-1.57277	2.9510751840229167e-5	4.270769479799457e-4	3.102032016322138e-4	4556	tags=45%, list=24%, signal=34%	CACYBP/WDHD1/BUB1B/CAMTA1/PGAM5/WDR1/C3orf14/C11orf24/KIF4A/GLRX2/DNAJC9/BUB1/CTH/HMGB2/KIF2C/TNFRSF12A/MUC1/RRS1/LARP6/MIS18A/GART/YWHAH/RFC3/TUBA4A/KIF20A/FAM83D/POF1B/MCM4/CTPS1/AREG/ILF2/TRIP13/CREBZF/KRT10/DDX39A/SHCBP1/ZNF367/CENPI/IRAK1/NEK2/CDC6/CBWD1/MTHFD1/FANCI/UBE2C/DTYMK/SLC52A2/GINS1/MT2A/IFRD2/AURKA/WARS1/SLC1A5/RNF26/CEACAM1/RAD51/NUF2/CCNB1/KNSTRN/ASF1B/DDB2/TUBB4B/CENPW/MELK/HTA…
Retinoblastoma pathway up	Retinoblastoma pathway up	70	-0.405183	-1.57285	0.009924085626787357	0.04591792186976414	0.03335203748100106	5402	tags=59%, list=29%, signal=42%	HACD3/NPAT/TFDP1/HAUS1/CHAF1A/SKP2/HUNK/RAD51AP1/HMGB2/BARD1/RFC3/MCM4/TCF19/RFC4/DONSON/SPIN4/ZNF367/DCK/FAM111A/ATAD2/CENPK/CDC25A/ASF1B/EZH2/MELK/CLSPN/RRM2/FEN1/MANEAL/POLD3/CDCA5/UBR7/ESCO2/RECQL4/BTG3/SLBP/RMI1/CDCA4/PCNA/EED/VRK1
Mitotic prophase	Mitotic prophase	140	-0.363112	-1.57499	0.001153383376076137	0.008587039239225807	0.0062371127197302515	5552	tags=41%, list=30%, signal=29%	NCAPH2/H3C6/H4C15/NDC1/GORASP2/MASTL/H4C6/H2BC8/NUP88/H4C1/H2AC20/H3-3B/NUP37/USO1/H2BC17/H4C5/ENSA/H3C2/NUP54/H3C1/NCAPG2/H2BS1/NUP205/SEC13/SEH1L/RAB1B/NUP85/H2BC15/NUP35/NCAPD3/CCNB1/EMD/H4C14/PLK1/PPP2R1B/H2AB1/H3C13/H2BC5/H3C12/H2AC4/H2BC9/H4C3/H3C10/CDK1/CCNB2/H4C13/H4C9/H2BC12/H2AZ1/VRK1/H3C4/H2AJ/BANF1/H3C8/H2BC11/H2AX/H2AC8
Processing of capped intron containing pre mrna	Processing of capped intron containing pre mrna	241	-0.337644	-1.57725	1.1390541943661531e-4	0.0013398189975740687	9.731645424108807e-4	5856	tags=41%, list=31%, signal=28%	SNRNP27/RBMX/DHX15/SNRPA/CSTF1/SNRNP40/GLE1/POLR2E/PRPF19/PRPF3/CPSF1/U2AF2/SNW1/PCF11/NDC1/PPIL6/PPIE/CPSF4/PCBP2/NUP88/HNRNPH2/PRCC/BCAS2/ZCRB1/SRSF3/LSM5/NUP37/PDCD7/CLP1/THOC6/CSTF2/PRPF31/NUP54/SRSF2/THOC7/METTL3/PAPOLA/NUP205/SEC13/SEH1L/THOC3/SNRPB2/DDX39A/THOC1/SF3B6/PPIL3/PPIL1/HSPA8/PABPN1/EIF4E/HNRNPC/PLRG1/NUP85/LUZP4/POLR2I/PRPF4/PHF5A/SNRPC/YBX1/ZMAT5/ZRSR2/HNRNPF/NUP35/SNRPE/CPSF2/…
Detoxification of reactive oxygen species	Detoxification of reactive oxygen species	37	-0.474259	-1.57983	0.007455771778846582	0.03722106221377673	0.027035157766013465	3676	tags=57%, list=20%, signal=46%	P4HB/CCS/TXNRD2/GSR/PRDX6/PRDX1/GPX5/TXN2/CYCS/ATOX1/NUDT2/PRDX3/TXN/GPX1/PRDX2/PRDX5/SOD1/GPX2/CYBA/NOX4/GSTP1
Resolution of sister chromatid cohesion	Resolution of sister chromatid cohesion	125	-0.368149	-1.57989	0.002417028546504735	0.015415085117238854	0.011196597660956221	4807	tags=44%, list=26%, signal=33%	CENPE/NUP37/TUBB8/BUB1B/BUB3/BUB1/KIF2C/ITGB3BP/TUBA1B/TUBA4A/TUBA3C/RAD21/RPS27/SEC13/TUBA1C/SEH1L/ZW10/PMF1/CENPI/NUP85/SGO1/B9D2/DYNLL1/TUBA8/CENPK/ERCC6L/NUF2/MIS12/CCNB1/TUBB4B/CENPS/SKA1/PLK1/CENPA/NDC80/CDCA5/PPP2R1B/KIF18A/CENPU/CENPN/PPP2R5C/SKA2/AURKB/ZWINT/CDK1/CCNB2/SPC25/CDCA8/CDC20/TUBAL3/CENPM/SPC24/MAD2L1/BIRC5/TUBA4B
Resistance to bcl2 inhibitor dn	Resistance to bcl2 inhibitor dn	47	-0.44781	-1.58102	0.010143041362682069	0.04678330268624711	0.03398059844916813	2690	tags=36%, list=14%, signal=31%	POMC/SNTB1/GALK1/GRP/MGMT/ENO3/HSPB1/ASS1/PCK2/FZD9/CALML3/DLK1/PRSS2/COMTD1/PRSS1/SYNGR4/CEL
Response to azacitidine and tsa dn	Response to azacitidine and tsa dn	70	-0.407566	-1.5821	0.009037026201431694	0.04291129860808856	0.031168205817210453	4877	tags=46%, list=26%, signal=34%	SREK1IP1/TRMT5/OGFOD3/KAT8/AP1G2/DHFR/RBMX/HDGF/PPIE/DIAPH2/TOM1L1/RPL13A/HMGB2/ITGB3BP/GATB/ERP44/HSPBP1/PMF1/LYRM4/ATRAID/ANP32B/SUCLG2/PAICS/PAAF1/PPP2R5C/H4C3/MACROD1/LSM7/CCNA2/MRPL58/NDUFC1/MYF5
Fceri mediated nf kb activation	Fceri mediated nf kb activation	81	-0.396135	-1.58668	0.004523395890283462	0.02554286372849013	0.0185528114896172	5801	tags=56%, list=31%, signal=39%	BCL10/LYN/CDC34/PSMB1/PSMF1/PSMD4/PSMD6/UBE2D2/PSMD7/PSMC2/SKP1/RELA/PSMD8/CUL1/RPS27A/UBE2N/PSMC6/PSMC5/PSMD10/PSMA8/UBA52/PSMC3/PSMB4/PSMD12/PSMB7/PSMA6/PSMA7/RASGRP1/PSMB2/PSMA3/PSMC1/PSMA1/PSMD14/PSMB6/PSMA5/PSMB9/SEM1/PSMB10/PSMB5/PSMA4/PSMB8/PSME1/UBB/PSME2/PSMB3
Plk1 pathway	Plk1 pathway	45	-0.456125	-1.58831	0.006719701648753855	0.03425089963784534	0.024877808967910302	4807	tags=47%, list=26%, signal=35%	ECT2/PPP1CB/CENPE/CDC25C/TUBG1/BUB1B/BUB1/KIF20A/SGO1/AURKA/ERCC6L/CCNB1/CLSPN/PLK1/NDC80/CENPU/PAK1/CDK1/CDC20/SPC24/PRC1
Dna repair genes	Dna repair genes	223	-0.346155	-1.59115	1.266619522507164e-4	0.0014469232328064101	0.0010509586655415963	6029	tags=43%, list=32%, signal=30%	BLM/UBA1/MUTYH/UBE2V2/RAD9A/GADD45A/EXO1/SPO11/RAD23A/RAD51C/PARP3/CETN3/XPA/NEIL1/XRCC6/POLG2/NTHL1/APTX/UBE2D3/ATP23/UBE2D2/MLH3/UNG/MNAT1/CHAF1A/RAD23B/MBD2/ALKBH3/NUDT1/MAD2L2/MRE11/SMUG1/RAD51AP1/RBBP8/TINF2/TP53I3/APEX2/HMGB2/GTF2H5/RPA4/ALKBH1/RFC3/RAD1/UBE2L3/TP73/RAD54L/RAD21/PNKP/RFC4/UBE2N/FANCG/CHEK2/ALKBH2/SUMO1/POLD4/GTF2H2/MUS81/RUVBL2/MPG/GADD45G/RAD51/PARP2/XRCC2/RDM1/DDB2/POLD2/…
G2 m cell cycle	G2 m cell cycle	236	-0.343482	-1.59191	1.3051281344192845e-4	0.0014876150771079987	0.0010805147922358074	4856	tags=36%, list=26%, signal=27%	STIL/CENPE/NUP37/SAPCD2/KIF22/CDC25C/ACSL4/TACC3/BUB1B/TROAP/BUB3/KDM6A/STAT1/HSPA1L/BUB1/HMGB2/KIF2C/TTK/KIF20A/FAM83D/RAD21/TRIP13/HMG20B/SHCBP1/ZNF165/CHEK2/NEK2/EIF4E/GOT1/SGO1/UBE2C/ARL6IP1/NUP35/ARHGAP11A/AURKA/PIF1/NUF2/CCNB1/KNSTRN/PIMREG/MELK/PLK4/RDH11/HMMR/PLK1/CENPA/PSRC1/NDC80/DBF4/KIF18A/DEPDC1/CEP55/KIF23/NEIL3/CDCA3/PPP2R5C/CDKN2D/TDP1/TNFAIP2/CKS1B/AURKB/ARHGEF39/OIP5/CDK1/DEPDC1…
Cancer prone response bpa	Cancer prone response bpa	51	-0.443028	-1.59392	0.008923510778942222	0.042488289029107666	0.030860956909626872	4400	tags=39%, list=23%, signal=30%	UCK2/TRAP1/RDX/COX6A2/GOT2/MTHFD1/GTF3A/SORD/TNNI1/MYC/QDPR/SNRPD1/H4C3/TNNC1/RANBP1/SDHA/NDUFB2/SNRPA1/HBZ/C1QBP
Regulation of ras by gaps	Regulation of ras by gaps	68	-0.415952	-1.59656	0.003860015290382179	0.022294617461938324	0.016193479298216483	3581	tags=43%, list=19%, signal=35%	PSMC6/PSMC5/PSMD10/PSMA8/UBA52/PSMC3/PSMB4/PSMD12/PSMB7/PSMA6/PSMA7/RBX1/PSMB2/PSMA3/PSMC1/PSMA1/PSMD14/PSMB6/PSMA5/PSMB9/SEM1/PSMB10/PSMB5/PSMA4/PSMB8/PSME1/UBB/PSME2/PSMB3
Colon cancer copy number dn	Colon cancer copy number dn	60	-0.428287	-1.5973	0.008963583138830248	0.04260182687385003	0.03094342402266609	3044	tags=33%, list=16%, signal=28%	CFHR2/PDXDC1/APOBEC3A/PPIAL4A/TAF13/H4C14/H2AC18/H3-2/NANOG/PTPN20/FRMPD2/AMY2A/DPPA3/OR2T11/TEX28/OR4C6/ELAPOR1/RBFOX1/LCE3E/GDF3
Failed heart ventricle dn	Failed heart ventricle dn	43	-0.462199	-1.59784	0.007577665584185773	0.03761091819819374	0.027318325881533746	4235	tags=51%, list=23%, signal=40%	PTDSS1/LDHA/TUBA3C/FCN3/CD68/IRAK1/LPCAT4/GTF3A/WARS1/NQO2/SERPINB1/NME2/IFITM3/EBP/ZP3/PPP2R5C/SERPINA3/RAB9A/IFITM1/PSME2/ATP5MC1/ISG15
Akt1 signaling via mtor up	Akt1 signaling via mtor up	34	-0.48904	-1.59974	0.008782046364011874	0.04197133846696584	0.030485474879467064	5674	tags=53%, list=30%, signal=37%	CDC34/CDK16/CORO1B/PMPCA/POR/SLC37A1/HNRNPAB/BSG/RNF126/GPX4/CLDN3/TMED10/AKT1/CYB561/BRMS1/UBE2M/BIK/NEDD8
Hmga1b targets	Hmga1b targets	85	-0.398207	-1.60333	0.002054423003811024	0.013604610945545496	0.009881577294747926	3610	tags=46%, list=19%, signal=37%	RPS3A/PTMA/ATP5F1B/GPX4/MAK/AKR1A1/ANXA1/PSMB4/UNC5A/RPL10/ARF6/PSMA6/ATP5PB/CXCL2/CYP3A4/GSTM1/PSMA1/CYP2J2/COX4I1/RPL19/COX5B/ARF5/PSMB6/PCNA/MIF/SOD1/SLC6A11/COX5A/COX7A2/SLC25A5/CSF2/ATP5PD/TK1/ATP5MC1/CTSV/CXCL10/NME1/GRM5/TAC1
Head and neck cancer d	Head and neck cancer d	33	-0.494466	-1.60562	0.006585152094956298	0.03382522790948639	0.024568626433929413	875	tags=36%, list=5%, signal=35%	MUC5B/TNFRSF17/TFF3/FOLR1/BPIFB2/ELAPOR1/AGR2/AZGP1/LTF/SCGB3A1/MSMB/TCN1
Rb1 acute lof up	Rb1 acute lof up	233	-0.348506	-1.61209	9.833043258254315e-5	0.0011836410950122952	8.597262366722601e-4	4707	tags=42%, list=25%, signal=32%	PRIM1/KIF22/CDC25C/HAT1/MRE11/PERP/RAD51AP1/E2F8/KIF4A/DNAJC9/BUB1/HMGB2/KIF2C/ARCN1/EPHX1/SRSF2/SMAD6/KIF20A/RCL1/MCM4/RAD21/HMGN2/RFC4/TRIP13/HPF1/PTMA/NEK2/HNRNPC/CDC6/PABPC4/HMGN1/DTYMK/IFRD2/ANP32B/CENPK/AURKA/AHCY/HSPD1/RAD51/CPSF2/CCNB1/ASF1B/PIMREG/RRM2/PLK1/TMEM106C/CENPA/CHAF1B/S100A3/TIPIN/CXCL2/CDT1/DLGAP5/KIF23/ETFB/CDCA3/ORC6/SCOC/LAGE3/LSM3/CKS1B/PRDX2/PCNA/SERF2/CDK1/CCNB2/EI24/TY…
Breast cancer erbb2 up	Breast cancer erbb2 up	138	-0.373272	-1.61276	9.000719820517696e-4	0.00706885800538219	0.005134396495818422	1950	tags=22%, list=10%, signal=20%	SLPI/RRP7A/ABCA12/CYB561/FA2H/UBE2M/BIK/TSPAN8/ASS1/AR/ACE2/CAMP/NQO1/EIF5A/UCP2/CATSPERB/ALDH3B2/CRISP3/FGB/S100A8/DDC/AKR1B10/PIP/HMGCS2/LRRC31/SLC12A1/SCGB1D2/S100A7/TFAP2B/SCGB2A2
Ifnb1 targets	Ifnb1 targets	92	-0.392969	-1.61336	0.0026214785076678795	0.016370736086672624	0.0118907254797567	2897	tags=40%, list=15%, signal=34%	OAS1/CCL2/APOBEC3A/DDX60/GBP1/DDX58/OASL/STAP1/PARP12/GP9/IFIT2/HERC6/PLSCR1/CCL8/LAMP3/SAMD9/RSAD2/IFI35/LGALS3BP/CXCL8/LAP3/IFI44L/CMPK2/CHI3L1/LY6E/IFI44/MX1/RTP4/IFIT3/PDZK1IP1/HES4/IFIT1/ZBP1/CXCL10/IFI6/ISG15/IFI27
Temporal response to progesterone cluster 14	Temporal response to progesterone cluster 14	143	-0.370493	-1.61338	0.0010280680179819443	0.007878753749450941	0.005722656419438152	5678	tags=50%, list=30%, signal=35%	NARS1/CARM1/RPN1/TMEM97/CLPTM1L/GORASP2/RARS1/SSR2/ACOD1/PSMD6/CCT3/TMEM147/JAG2/CDK2AP1/MORF4L2/TPD52/ARHGDIA/BAX/TANK/METAP1/PRMT1/IPO4/PRELID3B/HTRA2/PTP4A3/CDK4/SEC13/CCT8/PKM/UBE2N/IRAK1/MRPS18B/GOLGA5/RAN/PABPC4/HMGN5/C6orf136/DTYMK/GPS1/RCN1/PDIA4/EBNA1BP2/THOP1/WDR74/GALK1/PES1/APEX1/MYDGF/GSTM1/GNPNAT1/NHP2/TMEM14C/UBE2M/LMAN2/MRPL20/NOP16/SLAIN1/SEC61B/CISD1/TYMS/PSMB5/PPA1/PPP1R14B/DCT…
Breast cancer relapse in bone up	Breast cancer relapse in bone up	96	-0.388733	-1.61468	0.00333688985772702	0.01996708077469176	0.01450289558557315	1511	tags=22%, list=8%, signal=20%	CAMP/TTC12/FBP1/IL24/TOX3/SPDEF/C9orf116/TFPI2/CYP2B6/CCNO/AGR2/SERPINA5/LRP1B/HMGCS2/TFF1/MSMB/SCGB2A1/SCGB1D2/GP2/CPB1/SCGB2A2
Ifn beta response up	Ifn beta response up	103	-0.385708	-1.61554	0.001893065855159177	0.012816130467516531	0.009308872142044228	4168	tags=38%, list=22%, signal=30%	HLA-C/SP110/SRSF2/B2M/IFIT5/CASP8/IRF9/BAG1/HLA-A/IFI16/OAS2/OAS1/BST2/TAP1/RHOC/GBP1/OASL/IFIT2/IRF1/CYCS/PLSCR1/IFI35/NMI/IFI44/PMAIP1/PSMB9/SEM1/PSMB10/ATP6V0B/MX1/PSMB8/PSME1/HADH/SSBP1/IFIT3/IFITM1/IFIT1/IFI6/ISG15
Hdacs deacetylate histones	Hdacs deacetylate histones	89	-0.397019	-1.61729	0.0030043625960513316	0.018310148046101298	0.013299398558329954	5811	tags=46%, list=31%, signal=32%	HDAC8/H3C3/MTA2/H3C6/H4C15/CHD4/GPS2/H4C6/H2BC8/H4C1/H2AC20/H2BC17/H4C5/H3C2/H3C1/H2AC12/HMG20B/RCOR1/MTA1/H2BC15/H4C14/BRMS1/SAP18/H3C13/H2AC11/H2BC5/H3C12/H2AC4/H2BC9/H4C3/H3C10/H4C13/H4C9/H2BC12/H3C4/H2AW/RBBP7/H3C8/H2BC11/H2AC8/H2AC17
Response to uv scc up	Response to uv scc up	104	-0.386153	-1.61967	0.0025588834529443483	0.01613631279017048	0.011720454390539406	4666	tags=38%, list=25%, signal=29%	YWHAZ/SKP1/ME2/AP1S2/PSMD8/UBE2E1/B2M/ATP6AP2/PAPOLA/SRI/ATP5F1A/EIF2S3/KYAT3/CXCL3/PGK1/RRM2/MYCBP/ADK/AP4S1/RCN2/PLSCR1/CXCL1/CXCL2/PFDN6/PRDX3/CXCL8/UPK1B/PMAIP1/CDK1/H2BC12/RIDA/ANAPC15/SSBP1/ANXA3/CSF2/HSD17B8/HPRT1/SDHD/CCL20/ACKR2
Degradation of beta catenin by the destruction complex	Degradation of beta catenin by the destruction complex	85	-0.403392	-1.6242	0.001719012681550722	0.011887722597784322	0.008634532084652514	3581	tags=54%, list=19%, signal=44%	PSMB1/FRAT2/CTBP1/PSMF1/LEF1/PSMD4/PSMD6/PSMD7/PSMC2/SKP1/TLE1/PSMD8/CUL1/RPS27A/PSMC6/PSMC5/PSMD10/PSMA8/UBA52/PSMC3/PSMB4/PSMD12/PSMB7/PSMA6/PSMA7/RBX1/PSMB2/PSMA3/PPP2R1B/PSMC1/PSMA1/PPP2R5C/PSMD14/MYC/PSMB6/PSMA5/PSMB9/SEM1/PSMB10/PSMB5/PSMA4/PSMB8/PSME1/UBB/PSME2/PSMB3
Cml quiescent vs normal quiescent up	Cml quiescent vs normal quiescent up	91	-0.396994	-1.62457	0.005772515906582479	0.030628220340590047	0.0222465109739289	2672	tags=38%, list=14%, signal=33%	PCCB/EZH2/MELK/APOC1/CD38/RRM2/CCL8/CEP55/CENPU/DLGAP5/AMMECR1/KLF1/SERPINB2/H1-2/CLEC11A/PRDX2/ZWINT/CDK1/CCNB2/TFR2/ELOVL6/XK/CHEK1/CDC20/ELP5/TST/SAC3D1/PRC1/TK1/CCL20/PPIF/H2AX/PCLAF/CDKN3/RHAG
Ifn gamma response up	Ifn gamma response up	71	-0.416565	-1.63101	0.0026560252713782842	0.016506444147335247	0.011989295714240114	5092	tags=54%, list=27%, signal=39%	IL15RA/PRAME/PPP5C/TRIM21/TEAD4/SKP1/STAT1/HLA-C/SP110/SRSF2/B2M/CASP8/IRF9/BAG1/HLA-A/IFI16/BST2/TAP1/RHOC/GBP1/IFIT2/IRF1/CYCS/PLSCR1/IFI35/NMI/PMAIP1/PSMB9/SEM1/PSMB10/ATP6V0B/PSMB8/PSME1/HADH/SSBP1/IFIT3/IFITM1/ISG15
Peroxisomal protein import	Peroxisomal protein import	62	-0.434311	-1.63175	0.004701767801326593	0.026154438055659354	0.018997022574343946	7343	tags=76%, list=39%, signal=46%	CAT/IDE/DDO/UBE2D1/HACL1/GNPAT/ECH1/PEX10/BAAT/PEX13/MLYCD/PEX26/CRAT/PEX2/ACOX1/ACOX3/PEX7/PHYH/ACOX2/UBE2D3/DECR2/UBE2D2/DAO/ACAA1/HMGCL/USP9X/AMACR/RPS27A/MPV17/PECR/ACOT4/PAOX/SLC27A2/NUDT19/SCP2/ZFAND6/ACOT2/IDH1/UBA52/EPHX2/NUDT7/ECI2/TYSND1/DHRS4/PIPOX/GSTK1/UBB
Dna repair pathways full network	Dna repair pathways full network	120	-0.379297	-1.63336	0.0013271220745239365	0.00958952724817296	0.006965260168203432	5763	tags=39%, list=31%, signal=27%	EXO1/RAD23A/RAD51C/XPA/XRCC6/GTF2H2C/NTHL1/USP1/RAP1A/UNG/MNAT1/RAD23B/MRE11/SMUG1/APEX2/GTF2H5/RFC3/PNKP/RFC4/FANCG/POLD4/GTF2H2/FANCI/MPG/RAD51/PARP2/DDB2/POLD2/POLE3/CENPS/RFC2/FEN1/RBX1/MGMT/POLD3/APEX1/NEIL3/POLE2/FANCB/RPA3/PCNA/CETN2/CHEK1/POLE4/RAD54B/H2AX/CENPX
Mrna splicing	Mrna splicing	188	-0.366922	-1.63642	8.899591504115672e-5	0.0011008378329480585	7.995828898599112e-4	5856	tags=43%, list=31%, signal=30%	SNRNP48/SUGP1/SF3B2/SNRNP27/RBMX/DHX15/SNRPA/CSTF1/SNRNP40/POLR2E/PRPF19/PRPF3/CPSF1/U2AF2/SNW1/PCF11/PPIL6/PPIE/CPSF4/PCBP2/HNRNPH2/PRCC/BCAS2/ZCRB1/SRSF3/LSM5/PDCD7/CLP1/CSTF2/PRPF31/SRSF2/PAPOLA/SNRPB2/SF3B6/PPIL3/PPIL1/HSPA8/PABPN1/HNRNPC/PLRG1/POLR2I/PRPF4/PHF5A/SNRPC/YBX1/ZMAT5/ZRSR2/HNRNPF/SNRPE/CPSF2/SF3B5/BUD31/TXNL4A/EIF4A3/LSM8/CSTF3/POLR2H/MAGOH/LSM2/PUF60/SNRPF/SNU13/SNRPD2/MAGOHB/PO…
G2 m dna damage checkpoint	G2 m dna damage checkpoint	94	-0.395886	-1.63659	0.002248488429086981	0.014571336335416513	0.010583748911491848	4719	tags=41%, list=25%, signal=31%	H2BC17/H4C5/CDC25C/YWHAZ/MRE11/RBBP8/DNA2/BABAM1/YWHAE/BARD1/YWHAH/RFC3/RAD1/H2BS1/RFC4/UBE2N/CHEK2/SUMO1/ATRIP/RHNO1/BRCC3/H2BC15/CCNB1/RMI2/H4C14/RFC2/SFN/RPA3/H2BC5/RMI1/H2BC9/H4C3/CDK1/H4C13/H4C9/H2BC12/CHEK1/H2BC11/H2AX
Telomere c strand lagging strand synthesis	Telomere c strand lagging strand synthesis	34	-0.500719	-1.63794	0.005771100358263014	0.030628220340590047	0.0222465109739289	4707	tags=41%, list=25%, signal=31%	PRIM1/TINF2/DNA2/RFC3/RFC4/POLD4/POLD2/RFC2/FEN1/POLD3/RPA3/PCNA/POLA2/DSCC1
Breast cancer prognosis up	Breast cancer prognosis up	49	-0.456336	-1.64018	0.005764467120034844	0.030628220340590047	0.0222465109739289	3973	tags=47%, list=21%, signal=37%	KLRG2/KIF20A/SCLT1/CTPS1/MYBL2/AQP5/HSPA14/MELK/NDC80/CDCA5/FA2H/CEP55/CENPN/EBP/TMEM208/PSMD14/DSCC1/UBE2T/AMH/CDCA8/PTTG1/PDX1/CARTPT
Fgfr2 alternative splicing	Fgfr2 alternative splicing	27	-0.525852	-1.64108	0.010159095373344636	0.046799470530093853	0.03399234180583599	3045	tags=33%, list=16%, signal=28%	POLR2I/ESRP1/HNRNPF/POLR2H/POLR2J/POLR2K/POLR2F/POLR2G/POLR2L
Spliceosome	Spliceosome	126	-0.381177	-1.64177	0.0010990573474928408	0.008326975668063405	0.006048218065537228	4303	tags=46%, list=23%, signal=36%	SRSF7/RBM25/SF3B2/HSPA1A/SNRNP27/RBMX/DHX15/SNRPA/SNRNP40/PRPF19/PRPF3/U2AF2/SNW1/PPIE/BCAS2/SRSF3/LSM5/HSPA1L/PRPF31/SRSF2/ZMAT2/THOC3/SNRPB2/THOC1/SF3B6/PPIL1/CCDC12/HSPA8/HNRNPC/PLRG1/PRPF4/PHF5A/SNRPC/SNRPE/SF3B5/BUD31/TXNL4A/EIF4A3/LSM8/MAGOH/LSM2/PUF60/SRSF8/SNRPF/SNU13/SNRPD2/MAGOHB/SNRPB/LSM3/SNRPD1/LSM6/PPIH/LSM7/ALYREF/LSM4/SNRPG/CWC15/SNRPA1
Antimicrobial peptides	Antimicrobial peptides	69	-0.423569	-1.64177	0.0032728011543260507	0.019652064740195586	0.01427408674227593	1511	tags=30%, list=8%, signal=28%	CAMP/DEFB125/DEFB4B/REG3G/BPIFB6/PGLYRP4/BPIFB2/S100A7A/REG3A/DEFB134/CHGA/PRSS2/S100A8/ART1/BPIFA2/DEFB1/HTN3/LTF/DEFB4A/S100A7/DCD
Temporal response to progesterone cluster 9	Temporal response to progesterone cluster 9	80	-0.414718	-1.64931	0.0019804077260799015	0.013285235162452672	0.009649601790315312	4820	tags=41%, list=26%, signal=31%	RPL36A/HES1/KRT19/RTCB/IFIT1B/FAAP20/RNASET2/RAB25/GSTO1/EYA2/IRF9/IRF7/LGALS3/NCBP2AS2/CTSC/PFDN2/IMMP1L/VAMP8/H2AC18/CBR1/GSTA1/TSPAN8/SURF1/S100A13/PSMB9/TMX2/THRSP/CHCHD10/PSMB8/TST/ANPEP/ISG15/OVGP1
Lrrc3b targets	Lrrc3b targets	30	-0.516959	-1.64957	0.00868901053230696	0.04175912524481852	0.030331335862481584	4476	tags=50%, list=24%, signal=38%	FTH1/HLA-B/HLA-C/B2M/HLA-A/IFI16/OAS2/TAP1/CXCL1/SERPINA1/IFI44/PSME2/IFIT1/ISG15/IFI27
Apoptosis by cdkn1a via tp53	Apoptosis by cdkn1a via tp53	52	-0.453347	-1.65035	0.005732880998829174	0.03054374654184892	0.022185154248993325	4548	tags=48%, list=24%, signal=37%	WDHD1/BIRC2/BUB1/HMGB2/TTK/NCAPG/MCM4/MCM6/FANCI/UBE2C/ATAD2/NCAPD3/AURKA/CCNB1/PARP2/CEP55/DLGAP5/AURKB/CDK1/TYMS/UBE2T/FAT2/PRC1/PBK/SERPINI2
Formation of tc ner pre incision complex	Formation of tc ner pre incision complex	53	-0.454671	-1.65155	0.003880678026163864	0.022388861355874833	0.01626193243709853	5570	tags=47%, list=30%, signal=33%	XPA/POLR2E/PRPF19/PPIE/COPS4/MNAT1/COPS3/COPS7A/RPS27A/GTF2H5/COPS5/GTF2H2/UBA52/HMGN1/GPS1/POLR2I/COPS6/POLR2H/RBX1/POLR2J/POLR2K/POLR2F/POLR2G/POLR2L/UBB
Skin carcinogenesis tpa up	Skin carcinogenesis tpa up	38	-0.48794	-1.65394	0.005962497531756516	0.03125003792839224	0.022698162151731455	3214	tags=42%, list=17%, signal=35%	FBXW12/S100A9/HSF1/EDF1/CREB3/SLPI/LSM8/SELENOS/MT1X/SCGB1A1/CTSV/MT1A/NME1/S100A8/SPRR1A/TMCO5A
Covid19 nonicu vs healthy donor platelets up	Covid19 nonicu vs healthy donor platelets up	141	-0.381001	-1.65687	4.072842271669344e-4	0.003767196298678718	0.0027362665172039158	2988	tags=33%, list=16%, signal=28%	IRF7/LMO4/SEC14L2/LYRM4/TPRN/ARL2/ZNF296/GADD45G/PFDN2/FDXR/CLN6/PARP12/NXT1/EXOC3L4/HMGA1/IFITM3/HERC6/RSAD2/MSRB2/TBC1D3L/FKBPL/LGALS3BP/TMEM208/KLF1/CMPK2/ADCK5/LY6E/METRN/IFI44/STOML2/FAM174C/MT1X/USP18/SPINK4/IFITM1/H2AW/C19orf81/TIMM10/UQCC3/SNRPA1/SMIM4/CLDND2/MRPL12/HMBS/IFI6/ISG15/IFI27
Embryonic stem cell	Embryonic stem cell	81	-0.413819	-1.65751	0.0018916002752122647	0.012816130467516531	0.009308872142044228	4434	tags=46%, list=24%, signal=35%	SLC16A1/KIF4A/RSL24D1/RPL4/HMGB2/HNRNPAB/RPL7/FAM83D/RPLP0/CCT8/TNNT1/FABP5/IDH1/IMPDH2/MTHFD1/RPS24/BRIX1/CCNB1/NME2/PITX2/HMGA1/PSMA3/SNRPF/LDHB/SMS/AURKB/CDK1/ELOVL6/NANOG/KPNA2/IFITM1/TK1/MTHFD2/PTTG1/GAL/CRABP1/GDF3
Myc targets and serum response dn	Myc targets and serum response dn	48	-0.465374	-1.66194	0.002723289948451832	0.016844646933650606	0.012234946029978733	5717	tags=60%, list=30%, signal=42%	DDX21/HSPA9/HDGF/TRIM14/UTP18/TFDP1/PA2G4/NOP14/RSL1D1/BAG2/SRPK1/CUL1/LDHA/RRS1/EXOSC7/IRAK1/FABP5/PPAT/RAN/RPP40/UCHL3/DKC1/EBNA1BP2/THAP12/TIMM17A/PAICS/MYC/EIF1AX/PRDX4
Response to gsk3 inhibitor sb216763 dn	Response to gsk3 inhibitor sb216763 dn	357	-0.343008	-1.6642	1.0612607486263815e-6	2.419298839346512e-5	1.7572342623971994e-5	4576	tags=39%, list=24%, signal=30%	RAD51AP1/BUB1B/E2F8/EAPP/PSAT1/SLC16A1/SFXN1/PKMYT1/TFB2M/MRTO4/BUB1/GPT2/DNAJA1/HNRNPAB/HDHD5/NCAPG/PIGW/GART/CEP76/RFC3/CCNE2/DPH2/TUBA4A/EEF1AKMT1/MCM4/CTPS1/RAD54L/TOE1/TCF19/MCM6/CD151/WT1/TRIP13/DHCR7/SLC27A2/EXOSC5/SEH1L/ST8SIA4/IDI1/SPIN4/SHCBP1/TFAM/MTBP/NIP7/ZNF367/MYBL2/FABP5/CDC6/XBP1/GINS3/FAM136A/TFRC/GINS1/TICRR/EIF4EBP1/MCAT/ATAD2/NCAPD3/DNAJC19/CENPK/CDC25A/TEX30/RAD51/INSIG1/NUF…
Colorectal adenoma up	Colorectal adenoma up	133	-0.38295	-1.66458	2.59466201327699e-4	0.0026575941734399704	0.0019303177685884062	2891	tags=34%, list=15%, signal=29%	CYP4X1/IRX3/BACE2/CXCL3/ART3/DGAT2/RRM2/CXCL1/CXCL2/RPL22L1/SP5/KLK11/ARNTL2/CXCL8/SERPINA3/KRT23/HES6/MUC5AC/CHI3L1/NQO1/CLDN2/NOTUM/L1TD1/CCL20/FABP6/NMU/GRM8/SLCO1B3/EPHX4/SLC6A14/REG3A/QPCT/CXCL11/S100A2/S100A8/CCNO/CST1/C2CD4A/MMP1/STYXL2/AZGP1/RNF183/MMP7/TCN1/MMP10
Global genome nucleotide excision repair gg ner	Global genome nucleotide excision repair gg ner	84	-0.415436	-1.66748	0.0014289811088249583	0.01022515371203637	0.007426941289287613	5100	tags=40%, list=27%, signal=30%	COPS4/MNAT1/COPS3/RAD23B/YY1/COPS7A/RPS27A/GTF2H5/RFC3/COPS5/RFC4/UBE2N/SUMO1/POLD4/GTF2H2/UBA52/GPS1/INO80C/TFPT/PARP2/COPS6/SUMO2/DDB2/POLD2/POLE3/RFC2/RBX1/POLD3/POLE2/RPA3/PCNA/CETN2/POLE4/UBB
Response to camptothecin dn	Response to camptothecin dn	41	-0.483081	-1.67119	0.005814261254186604	0.030786304194829788	0.02236133364919498	4530	tags=59%, list=24%, signal=45%	SSB/ENO1/SWI5/PSAT1/SLC44A2/GAPDH/RPL3/EMC2/PPIA/RCN1/AK4/ALDOA/MIA2/OSTF1/HIGD1A/IFITM3/ENO3/NDUFV3/BAD/FKBP3/SLC25A1/HIKESHI/CDK1/MT1A
T all with mll enl fusion dn	T all with mll enl fusion dn	87	-0.413009	-1.67251	0.0019264150042039012	0.01297371255118758	0.009423330361121253	4405	tags=46%, list=23%, signal=35%	APLP2/PKMYT1/PGAM1/HMGB2/GAPDH/BARD1/HMGN2/DDX39A/GOT2/VBP1/UBE2C/PRDX6/SORD/SLC1A5/PSMA6/POLD2/HMGA1/PSMB2/EEF1D/ELOC/DNTT/MYC/TXN/DUT/PCNA/H4C3/POLA2/HINT1/TYMS/HADH/RANBP1/SDHA/ATP5MC3/HPRT1/UBE2S/COX8A/HBZ/C1QBP/PCLAF/CENPX
Downstream signaling events of b cell receptor bcr	Downstream signaling events of b cell receptor bcr	81	-0.417591	-1.67262	0.0014773896237590056	0.010498636333250202	0.007625582740418534	5239	tags=51%, list=28%, signal=37%	PSMD4/PSMD6/PSMD7/FKBP1A/PSMC2/SKP1/RELA/PSMD8/CUL1/RPS27A/PSMC6/PSMC5/PSMD10/PSMA8/UBA52/PSMC3/PSMB4/PPIA/PSMD12/PSMB7/PSMA6/PSMA7/RASGRP1/PSMB2/CALM1/PSMA3/PSMC1/PSMA1/PSMD14/PSMB6/PSMA5/PSMB9/SEM1/PSMB10/PSMB5/PSMA4/PSMB8/PSME1/UBB/PSME2/PSMB3
Homeostatic proliferation	Homeostatic proliferation	149	-0.384724	-1.67263	1.6223163669607565e-4	0.0017897588699318666	0.001299974007561251	3690	tags=34%, list=20%, signal=28%	SRPRA/NIFK/TRNT1/PSMC6/PSMC5/CHEK2/IRAK1/PARK7/SDHC/SORL1/FAM162A/VDAC2/ZRSR2/TIMM22/MRPS25/SNRPE/CPSF2/PCCB/STT3A/GALK1/CYCS/NUDCD2/MAGOH/UBALD2/GNPNAT1/NHP2/ATP5PF/AMZ2/QDPR/LAGE3/CMBL/NOP16/GPX1/MPC2/NDUFB3/TMX2/TAF1D/ATP6V0B/PPA1/UBL5/NDUFAB1/NPM3/IMPA2/HSPE1/PRPS2/HSD3B1/NDUFC1/NDUFB2/MRPS33/NME1/AQP9
Rassf1 targets dn	Rassf1 targets dn	30	-0.525697	-1.67745	0.007264598143491541	0.036413250836554396	0.02644841180204946	2880	tags=43%, list=15%, signal=37%	BST2/DDB2/PYCR1/EEF1D/EBAG9/PPP1CA/SNRPD1/LY6E/PPIB/POLR2K/PSMG1/EXOSC4/NDUFS8
Starch and sucrose metabolism	Starch and sucrose metabolism	46	-0.476555	-1.67784	0.0025705866783772343	0.016184584977340113	0.011755516425801756	1340	tags=26%, list=7%, signal=24%	PGM2L1/UGT1A6/G6PC2/AMY2A/UGT2B10/UGT2B7/ENPP3/UGT2B15/UGT2A3/AMY1A/AMY1C/AMY1B
Asparaginase resistance all dn	Asparaginase resistance all dn	25	-0.546096	-1.6795	0.0066869191254976725	0.03421152664802781	0.024849210778387323	3794	tags=44%, list=20%, signal=35%	DERL2/ZNHIT3/RCHY1/PPIA/HNRNPF/ARF6/SUMO2/F8A1/MRPL15/MCUB/SNRPG
Processing of dna double strand break ends	Processing of dna double strand break ends	97	-0.40449	-1.68186	0.002209346705737757	0.01442655795685795	0.010478590539520681	4749	tags=42%, list=25%, signal=32%	SIRT6/H2BC17/H4C5/MRE11/RBBP8/DNA2/RPS27A/BABAM1/BARD1/RFC3/RAD1/H2BS1/RFC4/PPP4C/UBE2N/SUMO1/ATRIP/RHNO1/UBA52/BRCC3/H2BC15/RMI2/SUMO2/H4C14/CCNA1/RFC2/CLSPN/TIPIN/RPA3/H2BC5/RMI1/H2BC9/H4C3/CCNA2/H4C13/H4C9/H2BC12/CHEK1/UBB/H2BC11/H2AX
Esrra targets up	Esrra targets up	380	-0.346271	-1.68501	3.350158847153851e-7	8.673376070621428e-6	6.299822640376589e-6	3666	tags=31%, list=20%, signal=26%	MTARC2/MRPL35/PDHX/RAB17/UBAC1/ZNF165/SEC14L2/FASTKD1/NFU1/SCML1/DGAT1/DLD/EMC3/GOT2/ATP6V0E2/C4orf19/GOT1/SIRT5/RNF139/PDSS1/CA12/FAM162A/SDHB/DLST/NDUFB5/SUCLG1/ILVBL/NANS/AK1/VDAC2/NDUFA9/ST6GALNAC4/UQCRC1/AURKA/CTSC/ASNS/NQO2/ISCA1/IDH3A/FDXR/FH/AFG3L2/HCCS/PCYT2/HTATIP2/YIPF2/TIMM17A/ATP5F1C/ATP5PO/DHRS11/HIGD1A/FBXL15/CYCS/MGST3/ECI2/ESRRA/NDUFAF4/FA2H/TBC1D31/COQ9/GSTM1/EBP/ATP5PF/CYP24A1/…
Signaling by notch4	Signaling by notch4	82	-0.421029	-1.68612	0.0014072640706969195	0.010111889110502831	0.007344672643804668	5507	tags=55%, list=29%, signal=39%	PSMF1/SNW1/HEY2/PSMD4/APH1A/PSMD6/PSMD7/PSENEN/HES1/PSMC2/YWHAZ/SKP1/PSMD8/TACC3/CUL1/RPS27A/PSMC6/PSMC5/PSMD10/UBA52/PSMC3/PSMB4/PSMD12/PSMB7/PSMA6/PSMA7/AKT1/RBX1/PSMB2/PSMA3/PSMC1/PSMA1/PSMD14/PSMB6/PSMA5/PSMB9/SEM1/PSMB10/PSMB5/PSMA4/PSMB8/PSME1/UBB/PSME2/PSMB3
Systemic lupus erythematosus	Systemic lupus erythematosus	157	-0.387148	-1.68625	6.679579558538053e-5	8.646531127032174e-4	6.280324075800789e-4	2346	tags=30%, list=13%, signal=26%	H2BC15/OAS1/TAP1/OASL/H4C14/IFITM3/PLSCR1/C6/H2AC18/IFI35/LGALS3BP/SNRPB/H2AB1/H3C13/IFI44L/H2AC19/H2AC11/H2BC5/H3C12/H2AC4/SNRPD1/H2BC9/LY6E/H4C3/CAMP/C8B/H3C10/H4C13/H4C9/MX1/H2BC12/H2AZ1/GRIN2A/IFIT3/H3C4/H2AW/H2AJ/H3C8/H2BC11/HLA-DOB/H2AX/H2AC8/S100A8/H2AC17/ISG15/H3Y1/H3Y2
Hcmv late events	Hcmv late events	111	-0.396565	-1.68924	4.406517514534829e-4	0.004011020889555378	0.0029133661454661185	5541	tags=41%, list=30%, signal=29%	H3C6/H4C15/NDC1/VPS37D/VPS4A/H4C6/H2BC8/NUP88/H4C1/CHMP4A/H2AC20/NUP37/H2BC17/H4C5/H3C2/VPS25/NUP54/H3C1/SNF8/H2AC12/NUP205/SEC13/SEH1L/NUP85/H2BC15/NUP35/H4C14/CHMP2A/H3C13/VPS28/H2AC11/H2BC5/H3C12/H2AC4/H2BC9/H4C3/H3C10/H4C13/H4C9/H2BC12/H3C4/H2AW/H3C8/H2BC11/H2AC8/H2AC17
Liver cancer survival dn	Liver cancer survival dn	289	-0.352864	-1.69079	5.2465870341035625e-6	9.829242327164202e-5	7.139374892339968e-5	4257	tags=42%, list=23%, signal=33%	RPS7/MZB1/HMGB2/TTK/RPE/CCT5/TUBA1B/ITPRID2/ADH6/YWHAH/SRSF2/OPLAH/PDCD5/CDK4/ATP6AP2/RPS6/MCM6/CCT8/KRT10/CALM2/CCDC6/SLC4A4/RPS18/SNRPB2/RPS3A/PTPN2/NAAA/PFDN4/PTMA/TM7SF2/AKR1A1/RPL31/FABP5/HNRNPC/ACOT2/SDHC/DYNLL1/CLIC1/CYB5A/RAN/DYNLT1/HMGN1/METTL5/SUCLG1/PHLDA2/ATAD2/RPL9/PCK1/RPL12/CCNB1/EMD/RMI2/RPS9/SUMO2/NOP56/EIF4A3/AKR1D1/H4C14/PCYT2/TXN2/RFC2/LYAR/LSM8/ATP5F1C/RBX1/LIPC/TSPAN3/DYNC2I…
Gene silencing by rna	Gene silencing by rna	136	-0.38936	-1.69147	6.049325014186509e-4	0.005193348719233692	0.0037721385045921415	5596	tags=44%, list=30%, signal=31%	AGO2/POLR2E/H3C6/H4C15/NDC1/H4C6/H2BC8/NUP88/TARBP2/H4C1/PLD6/H2AC20/H3-3B/NUP37/H2BC17/H4C5/H3C2/NUP54/H3C1/H2BS1/NUP205/SEC13/SEH1L/MOV10L1/TDRD1/NUP85/BCDIN3D/RAN/POLR2I/H2BC15/NUP35/H4C14/POLR2H/HSP90AA1/POLR2J/H2AB1/H3C13/H2BC5/H3C12/H2AC4/H2BC9/POLR2K/H4C3/H3C10/H4C13/POLR2F/POLR2G/H4C9/H2BC12/H2AZ1/POLR2L/H3C4/H2AJ/H3C8/H2BC11/FKBP6/ASZ1/H2AX/H2AC8/TDRD12
Response to thc 24hr 5 dn	Response to thc 24hr 5 dn	53	-0.467482	-1.69809	0.0026138009167201316	0.016342599906483152	0.01187028903799191	3237	tags=42%, list=17%, signal=34%	SUB1/UBE2C/MT2A/WARS1/ASNS/LRRC28/RRM2/SLC3A2/EIF5/EBP/SERPINB2/DUT/PPIH/H4C3/NDUFB3/CDK1/FTMT/NDUFA1/RANBP1/ATP5MF/PCLAF/NME1
Adipogenesis peak at 16hr	Adipogenesis peak at 16hr	41	-0.491056	-1.69878	0.0047403418184284035	0.026284067832100345	0.019091177905998024	5934	tags=71%, list=32%, signal=48%	HELLS/MCM7/DNMT1/EMB/DDX21/SNX5/MCM5/HAT1/MRPL18/HMGB2/MCM4/MCM6/IFI16/CDC6/FAM111A/IFRD2/ABCF2/RAD51/ASF1B/RRM2/FEN1/HMGA1/CHAF1B/SERPINA3/ASS1/DUT/POLA2/PGP/CDCA7
Interleukin 1 signaling	Interleukin 1 signaling	102	-0.40542	-1.69982	0.0011175658770042692	0.008430013760360169	0.0061230587851586315	4816	tags=48%, list=26%, signal=36%	NKIRAS1/PSMB1/MYD88/PSMF1/PSMD4/PSMD6/PSMD7/IL1RAP/PSMC2/SKP1/IL1R2/RELA/PSMD8/CUL1/RPS27A/PELI3/UBE2N/PSMC6/PSMC5/IRAK1/PSMD10/PSMA8/UBA52/PSMC3/PSMB4/PSMD12/PSMB7/PSMA6/PSMA7/RIPK2/RBX1/PSMB2/PSMA3/PSMC1/PSMA1/PSMD14/PSMB6/PSMA5/PSMB9/SEM1/PSMB10/PSMB5/PSMA4/PSMB8/PSME1/UBB/PSME2/PSMB3/IL1A
Cytoprotection by hmox1	Cytoprotection by hmox1	124	-0.396574	-1.69988	2.8025307976290874e-4	0.002820046615114269	0.0020483135249941215	4698	tags=48%, list=25%, signal=36%	PSMC2/SKP1/PSMD8/MT-CO3/KEAP1/CUL1/HMOX2/COX7A2L/RPS27A/COX16/BLVRA/PSMC6/COX6B1/PSMC5/COX7C/PSMD10/CSNK2B/PSMA8/UBA52/PSMC3/PSMB4/NDUFA4/PSMD12/PSMB7/PSMA6/PSMA7/RBX1/PSMB2/CYCS/PSMA3/COX18/MT-CO2/PSMC1/PSMA1/PSMD14/TACO1/STAP2/COX4I1/COX5B/COX14/SURF1/PSMB6/SMARCD3/PSMA5/PSMB9/SEM1/PSMB10/PSMB5/COX6A1/COX5A/PSMA4/PSMB8/PSME1/COX6C/UBB/PSME2/PSMB3/COX8A/COX7B
Response to uv nhek up	Response to uv nhek up	217	-0.372231	-1.7011	1.1306056023328929e-5	1.9035555762153804e-4	1.3826291421718042e-4	3597	tags=35%, list=19%, signal=29%	PKM/RPS2/COL19A1/ATF4/PRSS3/RPL31/COX7C/KLK13/OAS2/MYL6/XBP1/DYNLL1/NOL7/RPL34/PHLDA2/S100A9/PIK3R3/SNRPE/CEACAM1/CXCL3/TXNL4A/PGK1/TUBB4B/GPAA1/RRP7A/CCNA1/GUK1/CXCL1/CXCL2/H2AC18/RPSA/RPL30/RPS21/SEC61G/RPS17/COX17/UBE2M/ECHS1/CXCL8/CYP2J2/TXN/SURF1/LY6E/PCK2/PMAIP1/POP7/UQCRB/RPL38/CCK/CYBA/PFN1/NDUFA1/COX7A2/RANBP1/TK1/APRT/CCL20/UBE2S/GFUS/NDUFC1/HCRT/CCDC85B/PPIF/ATP5ME/H2AX/H2AC8/QPCT/TGM3…
Cmv all up	Cmv all up	107	-0.400217	-1.70242	7.78234466847892e-4	0.00631411649322888	0.0045861973139564955	2897	tags=33%, list=15%, signal=28%	OAS1/WARS1/TAP1/GBP1/IDH3A/PSMA6/IRF1/PSMB2/EIF5/PSMA3/H2AC18/PSMC1/PNP/EMP2/POLR2K/MANF/EIF1AX/GRPEL1/SYNGR2/REC8/MX1/PSMB8/HSPE1/RANBP1/IFITM1/IDO1/UBE2S/SNRPA1/GAL/TFPI2/CXCL10/IFI6/ISG15/IFI27/IFNB1
Protein export	Protein export	23	-0.567447	-1.70496	0.008931447402663743	0.042488289029107666	0.030860956909626872	6037	tags=74%, list=32%, signal=50%	SRP54/SRP9/SRP72/OXA1L/SEC11C/SRP68/HSPA5/SRPRA/SRPRB/SRP14/SPCS1/IMMP2L/IMMP1L/SEC11A/SEC61G/SEC61B/SPCS2
Aminoacyl trna biosynthesis	Aminoacyl trna biosynthesis	41	-0.493094	-1.70583	0.0045458679978509576	0.025595969316861346	0.018591384218993562	7315	tags=71%, list=39%, signal=43%	QARS1/SEPSECS/DARS1/GARS1/LARS2/YARS1/IARS2/DARS2/VARS2/TARS3/NARS1/PSTK/AARS1/FARSA/WARS2/RARS1/SARS1/FARSB/IARS1/TARS1/FARS2/KARS1/PARS2/YARS2/CARS2/MARS2/WARS1/MTFMT/NARS2
Response to serm or fulvestrant dn	Response to serm or fulvestrant dn	49	-0.474792	-1.70652	0.003731010003116222	0.021818573820720517	0.015847709613570907	5803	tags=59%, list=31%, signal=41%	KIF11/MCM7/MYB/E2F1/FOXM1/FKBP1A/MCM5/CHAF1A/NUDT1/PRIM1/KIF2C/BARD1/MCM6/RNF126/HOXA11/MTHFD1/UBE2C/AURKA/RFC2/MYC/CKS1B/RNASEH2A/POLA2/CDK1/CCNA2/CDC20/TK1/GAL/H2AX
Response to thc 24hr 5 up	Response to thc 24hr 5 up	32	-0.534892	-1.70663	0.002642978448631537	0.016445199235929565	0.011944811066469763	4676	tags=44%, list=25%, signal=33%	IARS1/ABRACL/CTSL/RPS2/NUCB2/TFRC/RBX1/PNP/PCNA/CCNA2/ATP5MC3/GAL/EXOSC4/CKS2
Epithelial mesenchymal transition up	Epithelial mesenchymal transition up	165	-0.385267	-1.70731	7.807212731714173e-5	9.858519606321425e-4	7.160640160279641e-4	5042	tags=53%, list=27%, signal=39%	FOXM1/ANLN/MCM5/CDK2AP1/ENO1/STIL/CENPE/HILPDA/SAPCD2/PRIM1/TNK1/TUBG1/YEATS4/TACC3/BUB1B/UCK2/PKMYT1/EIF1AD/BUB1/TNFRSF12A/RRS1/BARD1/YWHAH/RFC3/KIF20A/MCM4/MCM6/RFC4/ZNF367/DCK/FABP5/CDC6/TUBA8/FJX1/CDC7/MT2A/YRDC/BRIX1/RAD51/CCNB1/ASF1B/PGK1/TUBB4B/SKA3/CENPW/PLK4/RFC2/RRM2/HMMR/PLK1/CENPA/NDC80/ENOPH1/POLD3/CDCA5/CYP2A13/CEP55/CENPU/COX17/KIF23/RECQL4/ORC6/ARPC5L/SERPINB2/CKS1B/PCNA/H4C3/ZWIN…
Hypoxia dn	Hypoxia dn	465	-0.343648	-1.7095	3.9056064019174354e-8	1.2735243153594068e-6	9.250120425593927e-7	5077	tags=42%, list=27%, signal=32%	SRM/LRRC59/ELK1/ZWILCH/AIMP2/COA7/ARMC6/MCM5/CHAF1A/UCHL5/SKP2/ADGRG1/PA2G4/MNS1/UTP14A/PARPBP/STIL/ZMPSTE24/CA2/POLR1G/EXOSC8/ARHGDIA/SAR1B/STX3/IARS1/RIOX1/DOLK/TUBG1/RAD51AP1/BCS1L/DNA2/IPO4/PKMYT1/GLRX2/DNAJC9/MRTO4/DNAJA1/RPP30/TOR3A/RPP25/CHPT1/CCDC86/POP5/NOL11/RRS1/C3orf52/GATB/AUNIP/BARD1/GART/SLC25A20/SRSF2/RFC3/PUM3/CCNE2/HEATR3/MCM4/CTPS1/TOE1/MCM6/NUP205/STIP1/GCSH/TRIP13/DHCR7/RRP9/…
Tnfr2 non canonical nf kb pathway	Tnfr2 non canonical nf kb pathway	100	-0.408819	-1.71049	0.0013192522803027443	0.009559476438986974	0.006943433054224971	5239	tags=45%, list=28%, signal=33%	PSMD4/PSMD6/PSMD7/TRAF3/LTA/PSMC2/SKP1/PSMD8/TNFSF13/BIRC2/CUL1/RPS27A/TNFRSF12A/TNFRSF13B/PSMC6/PSMC5/PSMD10/PSMA8/UBA52/PSMC3/PSMB4/PSMD12/PSMB7/PSMA6/PSMA7/PSMB2/PSMA3/PSMC1/PSMA1/TNFRSF17/UBE2M/PSMD14/PSMB6/PSMA5/PSMB9/SEM1/PSMB10/PSMB5/PSMA4/PSMB8/PSME1/UBB/PSME2/PSMB3/TNFRSF11B
Melo covid19 sars cov 2 infection a594 ace2 expressing cells ruxolitinib dn	Melo covid19 sars cov 2 infection a594 ace2 expressing cells ruxolitinib dn	76	-0.433089	-1.71271	0.0010760780923619756	0.00817692379328746	0.005939229340703033	2830	tags=45%, list=15%, signal=38%	DEGS2/AHCY/PRDX1/GBP1/ADGRG2/AKR1B1/CD38/RRM2/TRAPPC6A/TSPAN7/ETFB/ISOC2/PHB/TXN/NDUFA2/ROMO1/RNASEH2A/GPX2/PSMB10/CYBA/UCP2/CLDN2/ASB9/TK1/CFI/PSMB3/SLC51B/CTSV/FGB/INSL4/DDC/AKR1B10/AMBP/HABP2
Amyloid fiber formation	Amyloid fiber formation	106	-0.406407	-1.71312	3.234663943183947e-4	0.003159218291495532	0.0022946675846409405	1875	tags=25%, list=10%, signal=22%	H2AB1/H3C13/H2BC5/H3C12/H2AC4/H2BC9/H4C3/H3C10/H4C13/H4C9/H2BC12/H2AZ1/UBE2L6/H3C4/UBB/H3C8/H2BC11/APOA1/APOA4/CALB1/H2AX/H2AC8/IAPP/APCS/LTF/FGA
Srebf targets	Srebf targets	24	-0.565444	-1.71672	0.009559841226841339	0.044693558984289096	0.032462733366530674	4409	tags=54%, list=23%, signal=41%	HSD17B7/FDPS/IDI1/TM7SF2/INSIG1/RDH11/SQLE/ME1/FDFT1/SC5D/PMVK/ELOVL6/PCSK9
Response to methoxyestradiol up	Response to methoxyestradiol up	49	-0.478226	-1.71886	0.0034264426646616712	0.020314191724208206	0.014755016259308633	4267	tags=43%, list=23%, signal=33%	DNAJA1/SRSF2/UBE2L3/HMGN2/ATF4/HSPA8/ASNS/CRYBB1/CCNB1/SLC3A2/HSP90AA1/UBE2M/MYC/CKB/AHSA1/EIF5AL1/UBE2S/PTTG1/COX7B/NME1/CKS2
Aml with flt3 or nras dn	Aml with flt3 or nras dn	12	-0.673522	-1.72078	0.009434418547646093	0.04430822639696688	0.032182850776646225	4386	tags=75%, list=23%, signal=58%	CDC14A/PKMYT1/HSPA5/CCT8/KIF23/CYP2J2/LDHB/RPL28/RPS3
Pyruvate metabolism and citric acid tca cycle	Pyruvate metabolism and citric acid tca cycle	54	-0.473284	-1.72102	0.001773190278903995	0.01218823533535834	0.008852806598806577	4588	tags=56%, list=24%, signal=42%	ME2/PDHB/SLC16A1/LDHAL6A/LDHA/BSG/FAHD1/VDAC1/PDHX/L2HGDH/DLD/SDHC/SDHB/DLST/SUCLG1/IDH3A/FH/SUCLG2/IDH3G/ME1/MDH2/LDHB/DLAT/MPC2/PDHA1/IDH2/SDHA/SDHD/ME3/GSTZ1
Ub specific processing proteases	Ub specific processing proteases	194	-0.379509	-1.72199	2.878496585819038e-5	4.177468847926672e-4	3.034264006697311e-4	3305	tags=30%, list=18%, signal=25%	PSMD10/TAF10/PSMA8/UBA52/SMAD1/PSMC3/RCE1/OTUB1/PSMB4/H2BC15/VDAC2/PSMD12/PSMB7/UFD1/CDC25A/DDX58/PSMA6/PSMA7/DDB2/CCNA1/CLSPN/PSMB2/PSMA3/PSMC1/PSMA1/IFIH1/PSMD14/WDR20/MYC/H2AC11/H2BC5/H2AC4/CFTR/H2BC9/AR/PSMB6/PSMA5/PSMB9/SEM1/PSMB10/PSMB5/USP28/CCNA2/H2BC12/PSMA4/CDC20/PSMB8/PSME1/PTRH2/USP18/H2AW/UBB/PSME2/PSMB3/H2BC11/H2AC8/USP26/H2AC17
Activation of atr in response to replication stress	Activation of atr in response to replication stress	37	-0.517008	-1.72224	0.00206280425147409	0.01361774062482918	0.009891113910033455	4963	tags=62%, list=26%, signal=46%	RAD9A/MCM7/ORC4/MCM5/ORC5/CDC25C/RFC3/RAD1/MCM4/MCM6/RFC4/CDC6/ATRIP/ORC1/CDC7/CDC25A/RFC2/CLSPN/DBF4/ORC6/RPA3/CHEK1/CDC45
Reproduction	Reproduction	141	-0.39662	-1.7248	1.211570101322054e-4	0.001405857919371897	0.001021131273162613	1995	tags=22%, list=11%, signal=20%	MND1/ZP3/H2AB1/H3C13/RPA3/H2BC5/H3C12/H2AC4/H2BC9/H4C3/H3C10/REC8/H4C13/H4C9/H2BC12/H2AZ1/SYCE3/CATSPERD/SYCE2/H3C4/H2AJ/H3C8/CATSPERB/H2BC11/KCNU1/FKBP6/H2AX/H2AC8/DMC1/SPAM1/OVGP1
Processing of capped intronless pre mrna	Processing of capped intronless pre mrna	28	-0.548423	-1.72909	0.008579023057214467	0.04130759513155975	0.030003371341266537	5759	tags=57%, list=31%, signal=40%	CSTF1/CPSF1/PCF11/CPSF4/CLP1/CSTF2/PAPOLA/PABPN1/SNRPE/CPSF2/CSTF3/SNRPF/SNRPB/SLBP/SNRPG/LSM10
Cmv 24 hr up	Cmv 24 hr up	82	-0.432276	-1.73116	8.388187299405727e-4	0.006689774143426982	0.004859052607037211	2897	tags=35%, list=15%, signal=30%	OAS1/TAP1/GBP1/IDH3A/PSMA6/IRF1/PSMB2/EIF5/PSMA3/PSMC1/PNP/EMP2/POLR2K/MANF/EIF1AX/GRPEL1/SYNGR2/REC8/MX1/HSPE1/RANBP1/IFITM1/UBE2S/SNRPA1/GAL/TFPI2/IFI6/ISG15/IFI27
Breast cancer with brca1 mutated up	Breast cancer with brca1 mutated up	55	-0.4747	-1.73219	0.0014258527764185749	0.010216958976506952	0.0074209891225650165	6190	tags=62%, list=33%, signal=42%	CNOT9/NASP/BLM/SNRPA/DNMT1/PNN/ASF1A/HMGN4/TFDP1/USP1/FOXM1/MCM5/SKP2/EXOSC8/MRE11/RAD51AP1/DNA2/RFC3/MCM4/RAD54L/MCM6/RFC4/DDX39A/MYBL2/CDC7/EZH2/HMMR/CENPA/NDC80/CEP57/AURKB/CDK1/CDC20/UBE2S
Recognition and association of dna glycosylase with site containing an affected purine	Recognition and association of dna glycosylase with site containing an affected purine	53	-0.476943	-1.73245	0.0016943832968650695	0.011764774589553691	0.00854522999057359	2986	tags=47%, list=16%, signal=40%	H4C6/H2BC8/H4C1/H2AC20/H2BC17/H4C5/TINF2/H2BS1/H2BC15/MPG/H4C14/NEIL3/H2AB1/H2BC5/H2AC4/H2BC9/H4C3/H4C13/H4C9/H2BC12/H2AZ1/H2AJ/H2BC11/H2AX/H2AC8
Early t lymphocyte up	Early t lymphocyte up	106	-0.411541	-1.73477	2.1760627655135152e-4	0.0023163378859350475	0.0016824495718574485	4722	tags=52%, list=25%, signal=39%	PRR11/GGH/RAD51AP1/BUB1B/E2F8/BUB1/MZB1/KIF2C/FAIM/TTK/NCAPG/SYK/KIF20A/MCM4/CD99/NEK2/FANCI/UBE2C/GINS1/ATAD2/AURKA/CDC25A/NUF2/CCNB1/TUBB4B/TMSB15A/CENPW/MELK/RRM2/HMMR/CENPA/NDC80/FAM72C/CEP55/CENPU/DLGAP5/NEIL3/CDCA3/DNTT/OIP5/CDK1/CCNB2/TYMS/DSCC1/HMGB3/UBE2T/LRR1/PRC1/PBK/BIRC5/PTTG1/PCLAF/CDKN3/CKS2/PON1
Base excision repair ap site formation	Base excision repair ap site formation	60	-0.465781	-1.73713	0.0019000433545868043	0.012846487352796872	0.009330921571427118	5485	tags=50%, list=29%, signal=35%	NEIL1/H4C15/NTHL1/H4C6/H2BC8/H4C1/UNG/H2AC20/H2BC17/H4C5/SMUG1/TINF2/H2BS1/H2BC15/MPG/H4C14/NEIL3/H2AB1/H2BC5/H2AC4/H2BC9/H4C3/H4C13/H4C9/H2BC12/H2AZ1/H2AJ/H2BC11/H2AX/H2AC8
Translesion synthesis by polh	Translesion synthesis by polh	19	-0.611138	-1.73959	0.008445813736520135	0.04093399094125281	0.029732007558874174	4232	tags=53%, list=23%, signal=41%	RPS27A/RFC3/RFC4/RCHY1/UBA52/UFD1/RFC2/RPA3/PCNA/UBB
Adipogenesis 3	Adipogenesis 3	102	-0.416346	-1.74562	6.619474832100691e-4	0.005554321552928789	0.004034327623541567	4707	tags=52%, list=25%, signal=39%	PRIM1/KIF22/RAD51AP1/TACC3/E2F8/CSTF2/KIF4A/BUB1/HMGB2/KIF2C/TTK/CCNE2/KIF20A/MCM4/TCF19/ILF2/LMO4/DCK/CDC6/NUP85/IMPDH2/DTYMK/CDC7/CENPK/AURKA/RAD51/CCNB1/ASF1B/EZH2/RRM2/FEN1/PLK1/PNP/DLGAP5/CKS1B/SLBP/PCNA/CDK1/CCNB2/TYMS/NQO1/KPNA2/CDCA8/CDC20/CDC45/RNASEH2C/PRC1/TK1/MAD2L1/BIRC5/CDCA7/PCLAF/CKS2
Conversion from apc c cdc20 to apc c cdh1 in late anaphase	Conversion from apc c cdc20 to apc c cdh1 in late anaphase	20	-0.607795	-1.74657	0.004744600753853517	0.026284067832100345	0.019091177905998024	4182	tags=45%, list=22%, signal=35%	UBE2E1/ANAPC16/CDC26/UBE2C/ANAPC10/CDC20/ANAPC15/UBE2S/ANAPC11
Cd5 targets dn	Cd5 targets dn	430	-0.356212	-1.74963	1.099245990698759e-8	3.9328578778333375e-7	2.8565931995132223e-7	5559	tags=43%, list=30%, signal=31%	MED7/AP4B1/PSMF1/PNO1/TWF1/API5/FARSA/GLMN/MSANTD4/TAF9B/UBE2F/RARS1/MRPS17/APTX/GPATCH4/CYB5B/LCMT2/FMR1/NOP58/UBE2K/ANP32A/ABT1/OTUD6B/CCDC85A/AIMP2/BCCIP/PMPCA/SGK3/SRSF3/UCHL5/CNPY2/TRMT10C/RPF1/TXNDC9/SKP2/AZIN1/CDK2AP1/MS4A1/H3-3B/EIF3J/KLC1/CNOT4/PSMC2/CRYZ/SSU72/RNF138/TRMT10A/RBM4/BCL11A/TANK/BAG2/CSTF2/DNAJC9/DNAJA1/ENSA/NOL11/PIGW/SRSF2/RFC3/PUM3/UBE2L3/PDCD5/CCNE2/TUBA4A/RCL1/HSPA5/AS…
Zbp1 dai mediated induction of type i ifns	Zbp1 dai mediated induction of type i ifns	21	-0.603428	-1.75016	0.006908856019230166	0.03496505521716485	0.02539652895084608	717	tags=29%, list=4%, signal=28%	NKIRAS1/MYD88/RELA/TLR3/ZBP1/NLRP4
Hdr through homologous recombination hrr	Hdr through homologous recombination hrr	67	-0.458056	-1.75043	0.0011265490147035263	0.008448297705607814	0.006136339151568278	4610	tags=46%, list=25%, signal=35%	MRE11/RAD51AP1/RBBP8/DNA2/RPS27A/BARD1/RFC3/RAD1/SLX1B/RFC4/POLD4/ATRIP/MUS81/RHNO1/UBA52/RAD51/RMI2/XRCC2/POLD2/POLE3/RFC2/POLD3/POLE2/RPA3/RMI1/SLX1A/PCNA/CHEK1/XRCC3/POLE4/UBB
Nucleotide excision repair	Nucleotide excision repair	112	-0.410416	-1.75059	5.013206408500846e-4	0.004445445682718823	0.003228906383226834	5570	tags=43%, list=30%, signal=30%	XPA/POLR2E/PRPF19/PPIE/GTF2H2C/COPS4/MNAT1/COPS3/RAD23B/YY1/COPS7A/RPS27A/GTF2H5/RPA4/RFC3/COPS5/RFC4/UBE2N/SUMO1/POLD4/GTF2H2/UBA52/HMGN1/GPS1/POLR2I/INO80C/TFPT/PARP2/COPS6/SUMO2/DDB2/POLD2/POLE3/RFC2/POLR2H/RBX1/POLD3/POLR2J/POLE2/RPA3/POLR2K/PCNA/POLR2F/POLR2G/CETN2/POLR2L/POLE4/UBB
Fbxl10 enhancement of maperk signaling in diffuse large bcell lymphoma	Fbxl10 enhancement of maperk signaling in diffuse large bcell lymphoma	33	-0.541329	-1.75779	0.0015075833143011678	0.01065441596060304	0.00773873176281951	2572	tags=33%, list=14%, signal=29%	EZH2/H2AB1/H3C13/H3C12/H3C10/EED/H2AZ1/H3C4/H2AJ/H3C8/H2AX
Senescence associated secretory phenotype sasp	Senescence associated secretory phenotype sasp	109	-0.415157	-1.7604	2.773804887083372e-4	0.0028020868192653982	0.0020352686013583874	4232	tags=38%, list=23%, signal=29%	RPS27A/UBE2E1/H3C2/ANAPC16/H3C1/CDK4/H2BS1/CDC26/UBA52/UBE2C/H2BC15/ANAPC10/H4C14/CDKN2A/CCNA1/CXCL8/CDKN2D/H2AB1/H3C13/H2BC5/H3C12/H2AC4/H2BC9/H4C3/H3C10/CCNA2/H4C13/H4C9/H2BC12/H2AZ1/ANAPC15/H3C4/H2AJ/UBB/UBE2S/H3C8/H2BC11/ANAPC11/H2AX/H2AC8/IL1A
Response to thc dn	Response to thc dn	31	-0.554446	-1.76166	0.0034458292823597602	0.020382218671317433	0.01480442697297595	4533	tags=61%, list=24%, signal=47%	SRSF3/GIPC1/RBM4/DNAJA1/TUBA3C/MCM6/DHCR7/UBAC1/HSPA8/PABPC4/RRM2/PNP/EBP/SERPINB2/ZWINT/CDK1/CCNA2/PPIF/PCLAF
Myc and serum response synergy	Myc and serum response synergy	33	-0.543349	-1.76435	0.0014340443265104532	0.010232958961470714	0.007432610556560229	5792	tags=79%, list=31%, signal=55%	NCLN/SCAMP3/LIMK2/SNRPA/METAP2/FRAT2/FARSA/SRM/ARMC6/NME4/ARFIP2/TOMM40/TMEM183A/ZNF22/RNF126/MTA1/TAGLN2/FPGS/POLR2I/EOLA1/PYCR1/DDX28/MRPS12/NDUFS5/CCDC85B/MRPL12
Up by hbv infection	Up by hbv infection	99	-0.422347	-1.7652	3.733313590591521e-4	0.003503466597218127	0.002544709004803539	4391	tags=39%, list=23%, signal=30%	APOL3/STAT1/HLA-F/HLA-B/RNASET2/SP110/B2M/MCM6/HLA-A/IFI16/LGALS3/UBE2C/AURKA/CTSC/WARS1/GBP1/DENND2D/PARP12/CD38/RRM2/CXCR4/LAP3/CFL1/PSMB9/TYMS/PSMB10/KPNA2/PSME1/ISG20/UCP2/UBE2L6/CD5L/PRC1/PSME2/PBK/PTTG1/PLAAT4/CXCL10/IFI27
Purine salvage	Purine salvage	13	-0.676347	-1.76545	0.00876238198512261	0.04195519701426737	0.030473750691753943	3921	tags=62%, list=21%, signal=49%	GMPR2/DGUOK/DCK/ADK/PNP/APRT/HPRT1/GMPR
Mhc pathway	Mhc pathway	12	-0.691067	-1.7656	0.005899804863175414	0.03101617010962537	0.022528294528383095	3977	tags=67%, list=21%, signal=53%	B2M/HLA-A/TAP2/TAP1/PSMB6/PSMB9/PSMB5/PSMB8
Cancer microenvironment dn	Cancer microenvironment dn	45	-0.50765	-1.76772	0.0011940714974916337	0.008813547786643118	0.0064016350076651456	4901	tags=53%, list=26%, signal=39%	PA2G4/IARS1/TARS1/PSPH/PSAT1/BUB1/CTH/KIF2C/FAM83D/ARTN/RFC4/TRIP13/CDC6/FANCI/NDUFA9/AURKA/ASNS/KNSTRN/RIPK2/CCNB2/PSMG1/CDC20/LSM4/SLC7A11
Gluconeogenesis	Gluconeogenesis	45	-0.507766	-1.76813	0.0011940714974916337	0.008813547786643118	0.0064016350076651456	4637	tags=67%, list=25%, signal=50%	ENO1/SLC37A1/ME2/MDH1/PGAM1/LDHA/GAPDH/G6PC3/GOT2/GOT1/GPD2/PCK1/PGK1/ALDOA/ME1/TPI1/ENO3/SLC25A11/MDH2/SLC25A1/LDHB/BID/PCK2/FBP1/G6PC2/PGK2/SLC25A10/ME3/SLC37A4/GPT
Homology directed repair	Homology directed repair	137	-0.408193	-1.76823	1.0877476090087292e-4	0.0012912616777910075	9.378954038384751e-4	4749	tags=42%, list=25%, signal=31%	SIRT6/H2BC17/H4C5/MRE11/RAD51AP1/RBBP8/DNA2/RPS27A/BABAM1/BARD1/RFC3/RAD1/H2BS1/SLX1B/RFC4/PPP4C/UBE2N/SUMO1/POLD4/ATRIP/MUS81/RHNO1/UBA52/BRCC3/H2BC15/RAD51/RMI2/PARP2/XRCC2/SUMO2/POLD2/H4C14/POLE3/CCNA1/RFC2/CLSPN/FEN1/TIPIN/POLD3/POLE2/RPA3/H2BC5/RMI1/SLX1A/H2BC9/PCNA/H4C3/CCNA2/H4C13/H4C9/H2BC12/CHEK1/XRCC3/POLE4/UBB/H2BC11/H2AX
Dna mismatch repair	Dna mismatch repair	23	-0.588735	-1.76892	0.005097052226254878	0.027836161447057427	0.020218526059228747	4022	tags=48%, list=21%, signal=38%	RFC3/RFC4/POLD4/POLD2/POLE3/RFC2/POLD3/POLE2/RPA3/PCNA/POLE4
Chk1 chk2 cds1 mediated inactivation of cyclin b cdk1 complex	Chk1 chk2 cds1 mediated inactivation of cyclin b cdk1 complex	13	-0.67814	-1.77013	0.00833074113419027	0.040528780286447845	0.02943768672734597	4689	tags=69%, list=25%, signal=52%	CDC25C/YWHAZ/YWHAE/YWHAH/CHEK2/CCNB1/SFN/CDK1/CHEK1
E2f3 targets	E2f3 targets	96	-0.426185	-1.77024	4.182665142523562e-4	0.0038529132581927228	0.0027985261999172797	4576	tags=54%, list=24%, signal=41%	PRIM1/RAD51AP1/TACC3/BUB1B/RBBP8/DNA2/BUB1/GP1BA/HMGB2/KIF2C/NCAPG/NCAPG2/RPL3/KIF20A/RAD54L/SHCBP1/DCK/CDC6/FAM111A/UBE2C/CDC7/CENPK/AURKA/RPL12/ERCC6L/RAD51/NUF2/CCNB1/ASF1B/EZH2/MELK/HMMR/FEN1/PLK1/CHAF1B/CDCA5/DEPDC1/DLGAP5/CDCA3/H2AC4/SPC25/TYMS/TAF1D/CCNA2/UBE2T/CDC20/SYCE2/PRC1/TK1/PBK/H2AX/PCLAF
Dna repair	Dna repair	329	-0.366161	-1.77136	6.501670942828393e-8	2.042476140088529e-6	1.483532747224322e-6	5211	tags=38%, list=28%, signal=28%	H4C6/H2BC8/UBA7/USP1/H4C1/ASCC2/COPS4/UNG/MNAT1/COPS3/TDP2/RAD23B/PPP5C/ALKBH3/H2AC20/SIRT6/YY1/H2BC17/H4C5/MAD2L2/MRE11/SMUG1/RAD51AP1/COPS7A/RBBP8/TINF2/PAXIP1/DNA2/RPS27A/BABAM1/GTF2H5/FAAP20/BARD1/RFC3/RAD1/COPS5/EYA2/H2BS1/SLX1B/PNKP/RFC4/PPP4C/UBE2N/FANCG/CHEK2/RCHY1/ALKBH2/SUMO1/POLD4/ATRIP/GTF2H2/MUS81/RHNO1/UBA52/FANCI/HMGN1/BRCC3/GPS1/POLR2I/INO80C/H2BC15/MPG/UFD1/RAD51/TFPT/RMI2/PARP2/…
Genotoxic damage 24hr	Genotoxic damage 24hr	33	-0.548001	-1.77945	0.0012624537407662163	0.00919966290300926	0.0066820859799358295	4676	tags=42%, list=25%, signal=32%	IARS1/DNAJA1/RPL3/RPL10A/ATF4/EIF4EBP1/CDH15/HMGB3/IMP3/BANF1/MTHFD2/NAA38/H2AX/ISG15
Cellular response to hypoxia	Cellular response to hypoxia	75	-0.452008	-1.78041	5.121523884976566e-4	0.004498683772566317	0.003267575353766194	3581	tags=44%, list=19%, signal=36%	PSMC6/PSMC5/PSMD10/PSMA8/UBA52/PSMC3/PSMB4/PSMD12/PSMB7/PSMA6/PSMA7/CA9/RBX1/HIGD1A/PSMB2/PSMA3/PSMC1/PSMA1/ELOC/ELOB/PSMD14/PSMB6/PSMA5/PSMB9/SEM1/PSMB10/PSMB5/PSMA4/PSMB8/PSME1/UBB/PSME2/PSMB3
Uv response cluster g1	Uv response cluster g1	59	-0.479657	-1.78559	6.638541849768762e-4	0.005561263026017668	0.00403936949523799	3831	tags=51%, list=20%, signal=41%	ZNF330/RPS27/RPL37/PKM/RPL31/COX7C/OAS2/MYL6/DYNLL1/NOL7/RPL34/SNRPE/PGK1/GPAA1/GUK1/RPL30/RPS21/SEC61G/RPS17/COX17/TXN/UQCRB/RPL38/NDUFA1/COX7A2/RANBP1/TK1/NDUFC1/ATP5ME/HMGCS2
Transcription coupled nucleotide excision repair tc ner	Transcription coupled nucleotide excision repair tc ner	78	-0.45268	-1.78705	2.9760305210106746e-4	0.002971416520202906	0.0021582595883706548	5570	tags=46%, list=30%, signal=33%	XPA/POLR2E/PRPF19/PPIE/COPS4/MNAT1/COPS3/COPS7A/RPS27A/GTF2H5/RFC3/COPS5/RFC4/POLD4/GTF2H2/UBA52/HMGN1/GPS1/POLR2I/COPS6/POLD2/POLE3/RFC2/POLR2H/RBX1/POLD3/POLR2J/POLE2/RPA3/POLR2K/PCNA/POLR2F/POLR2G/POLR2L/POLE4/UBB
Tca cycle and deficiency of pyruvate dehydrogenase complex pdhc	Tca cycle and deficiency of pyruvate dehydrogenase complex pdhc	16	-0.655146	-1.78903	0.00550162815732123	0.029587044119539642	0.02149026271758815	3359	tags=62%, list=18%, signal=51%	DLD/IDH1/DLST/PCK1/IDH3A/FH/SUCLG2/DLAT/PDHA1/SDHA
Blister cytotoxicity up	Blister cytotoxicity up	133	-0.411629	-1.78924	4.3206333239991915e-5	5.92018693756485e-4	4.300070399444884e-4	3626	tags=35%, list=19%, signal=28%	RAB13/CLTA/AKR1A1/IRAK1/CD81/MED27/FABP5/PGRMC2/CYB5A/SMIM12/ILVBL/NANS/EOLA1/MIF4GD/CTSC/SLC43A3/DDB2/TUBB4B/TBL2/RFK/PSMB2/PBDC1/ATOX1/TPI1/CISD2/GNLY/PSMC1/THYN1/ETFB/CHCHD3/CNDP2/SKA2/ASMTL/PSMD14/TIMM23/PCK2/SOD1/SEM1/COX5A/MRPL57/MT1F/SDHA/MT1E/ANAPC11/CENPX/CKS2
Synthesis of active ubiquitin roles of e1 and e2 enzymes	Synthesis of active ubiquitin roles of e1 and e2 enzymes	30	-0.561227	-1.79083	0.002433278361870355	0.01547685200043959	0.011241461437880589	6107	tags=83%, list=33%, signal=56%	UBE2W/OTULIN/UBE2H/UBE2G2/UBE2Z/UBE2D1/UBE2G1/UBE2R2/UBA6/UBA1/CDC34/UBE2D2/UBE2K/USP9X/RPS27A/UBE2E1/UBE2L3/UBE2Q2/UBA52/UBE2C/UCHL3/UBE2A/UBE2T/UBB/UBE2S
Cellular response to chemical stress	Cellular response to chemical stress	160	-0.408981	-1.79179	1.1912336094379297e-5	1.9861603740531437e-4	1.4426283364169106e-4	4698	tags=51%, list=25%, signal=38%	PSMC2/GPX7/ERO1A/SKP1/PSMD8/MT-CO3/KEAP1/CUL1/HMOX2/COX7A2L/RPS27A/COX16/BLVRA/P4HB/PSMC6/COX6B1/PSMC5/CCS/COX7C/PSMD10/CSNK2B/PSMA8/UBA52/TXNRD2/PSMC3/GSR/PRDX6/PSMB4/NDUFA4/PSMD12/PSMB7/PRDX1/PSMA6/GPX5/PSMA7/TXN2/RBX1/PSMB2/CYCS/ATOX1/PSMA3/COX18/MT-CO2/PSMC1/PSMA1/NUDT2/PRDX3/PSMD14/TACO1/TXN/STAP2/COX4I1/GPX1/COX5B/COX14/SURF1/PSMB6/PRDX2/SMARCD3/PSMA5/PRDX5/PSMB9/SOD1/SEM1/GPX2/PSMB10/PSMB5…
Thyroid cancer cluster 3	Thyroid cancer cluster 3	28	-0.56855	-1.79254	0.0047349244398296785	0.026284067832100345	0.019091177905998024	5094	tags=68%, list=27%, signal=50%	RPL21/TMBIM6/TMEM147/EIF3K/SARS1/EIF3G/RPL18/PSMD8/RPS12/RPL10A/RPS2/HSPA8/ATP5F1A/RPL18A/CLDN7/UQCR11/RPS5/HINT1/RPL17
Melo bronchial epithelial cells influenza a del ns1 infection dn	Melo bronchial epithelial cells influenza a del ns1 infection dn	176	-0.405737	-1.79597	4.336222042050514e-6	8.513936950676348e-5	6.18401558100164e-5	5870	tags=59%, list=31%, signal=41%	DHFR/ZSCAN31/NUSAP1/KIF11/MCM7/EXO1/LMNB1/ZNF90/PPARGC1B/NCAPH/EPN3/CDCA2/HJURP/E2F1/RBBP8NL/SFXN2/TRAIP/FOXM1/ANLN/CENPE/HILPDA/HASPIN/PRR11/PRIM1/CDC25C/WDHD1/TACC3/BUB1B/E2F8/TROAP/PKMYT1/KIF4A/KIF2C/TTK/PHGDH/NCAPG/NCAPG2/KIF20A/MCM4/RAD54L/TCF19/WDR76/SHCBP1/FANCG/CENPI/MYBL2/NEK2/FOXA2/CDC6/SGO1/RHNO1/FANCI/UBE2C/ORC1/LURAP1L/CDC7/AURKA/CDC25A/PADI3/ERCC6L/RAD51/NUF2/CCDC34/ASF1B/XRCC2/PIMR…
Homologous recombination	Homologous recombination	29	-0.568384	-1.79771	0.002004771395294512	0.013413154637133228	0.009742514860863158	4610	tags=48%, list=25%, signal=36%	MRE11/RPA4/RAD54L/POLD4/MUS81/RAD51/XRCC2/POLD2/POLD3/RPA3/SEM1/SSBP1/XRCC3/RAD54B
Signaling by robo receptors	Signaling by robo receptors	216	-0.39463	-1.80116	1.7159467134417104e-6	3.6682811069094155e-5	2.664420426418555e-5	4310	tags=50%, list=23%, signal=39%	RPL4/RPS7/RPS27A/RPL37A/RPL7/RPLP2/RPS14/RPL3/RPLP0/RPL13/RPS6/RPL10A/RPS27/RPL37/RPS18/RPS13/RPS3A/RPS2/PSMC6/RPS10/RPL36/RPS8/PSMC5/PAK6/RPL31/PSMD10/RPL7A/RPL10L/PSMA8/RPL41/RPL26/UBA52/RPS27L/PSMC3/RPL34/PSMB4/RPL27A/PSMD12/PSMB7/RPL9/RPS24/RPL10/RPL12/RPL14/RPS19/PSMA6/RPL29/RPS9/RPL23A/RPL18A/PSMA7/EIF4A3/RPL15/RPL23/RPL32/RPS15/RBX1/PSMB2/RPS4X/MAGOH/PSMA3/RPSA/RPL30/RPS21/PSMC1/PSMA1/RPL2…
Thyroid cancer pax8 pparg dn	Thyroid cancer pax8 pparg dn	46	-0.511775	-1.80184	6.867485049350155e-4	0.005715877701817771	0.004151672366370173	5219	tags=59%, list=28%, signal=42%	BLVRB/TMEM147/EIF3K/SARS1/FKBP1A/SRSF3/YWHAZ/SKP1/PSMD8/RPS12/DNAJA1/B2M/RPL10A/RPS2/HSPA8/RAN/ATP5F1A/ETHE1/DDT/RPL18A/AKR1B1/EIF5/CLDN7/UQCR11/RPS5/HINT1/RPL17
E2f targets dn	E2f targets dn	16	-0.659909	-1.80203	0.004696531098939514	0.026154438055659354	0.018997022574343946	1937	tags=44%, list=10%, signal=39%	SYT3/H1-2/MT1X/MT1A/REG3A/CEL/AMY1B
Fanconi anemia pathway	Fanconi anemia pathway	39	-0.526837	-1.80333	8.352870092047214e-4	0.006671935924686395	0.004846095989755667	4232	tags=38%, list=23%, signal=30%	RPS27A/FAAP20/SLX1B/FANCG/ATRIP/MUS81/UBA52/FANCI/CENPS/FANCB/RPA3/SLX1A/UBE2T/UBB/CENPX
Asymmetric localization of pcp proteins	Asymmetric localization of pcp proteins	64	-0.47561	-1.80344	8.32441451840498e-4	0.006659531614723984	0.00483708623944585	3581	tags=47%, list=19%, signal=38%	PSMC6/PSMC5/PSMD10/PSMA8/UBA52/PSMC3/PSMB4/PSMD12/PSMB7/PSMA6/PSMA7/PSMB2/PSMA3/FZD4/PSMC1/PSMA1/PSMD14/PARD6A/PSMB6/PSMA5/PSMB9/SEM1/PSMB10/PSMB5/PSMA4/PSMB8/PSME1/UBB/PSME2/PSMB3
Inflammatory response and cholesterol up	Inflammatory response and cholesterol up	62	-0.48004	-1.80356	7.737084113532073e-4	0.006297228649749958	0.0045739309925345514	4720	tags=48%, list=25%, signal=36%	FLOT1/ERO1A/SLC16A1/STAT1/HLA-B/CTRB2/SP110/B2M/PRSS3/TFRC/TAP2/BST2/CTSC/PDIA4/CCL8/SERPINA1/TFF3/CMPK2/KLK1/IFI44/PSMB9/CELA1/SLC40A1/PSMB10/UPP1/PSMB8/PSME2/PRSS1/AMBP/SERPINI2
Bladder cancer cluster 3 up	Bladder cancer cluster 3 up	324	-0.373031	-1.80388	1.500899966304418e-7	4.368721257853312e-6	3.173178340893373e-6	4740	tags=46%, list=25%, signal=35%	POLDIP2/MCM5/CHAF1A/MNS1/GCA/CENPE/TOM1L1/TM4SF1/ACSL4/GGH/TARS1/MAD2L2/PIGC/AP1S2/USP14/WDHD1/TACC3/E2F8/CSTF2/UCK2/RTN3/KIF4A/BUB1/MORN2/HMGB2/KIF2C/REEP6/AK2/EPHX1/MIS18A/METTL2A/RFC3/RAD1/NCAPG2/FAM83D/MCM4/CTPS1/RAD54L/TCF19/MCM6/HMGN2/RFC4/TRIP13/APOBEC3B/ZNF232/PRSS3/SMIM29/SCML1/MYBL2/NEK2/PPAT/CDC6/ACOT2/DDAH1/NXT2/FAM136A/UBE2C/NUCB2/TFRC/ORC1/SUCLG1/CDC7/MRPL48/NDUFA9/ATAD2/AURKA/STBD1…
Colon and rectal cancer up	Colon and rectal cancer up	288	-0.37843	-1.80602	4.6623300596508335e-07	1.1492978214029232e-5	8.347813327654855e-6	6064	tags=54%, list=32%, signal=37%	RTKN/GYG2/HOXB5/GTPBP10/INTS7/HELLS/ATIC/PDCD2L/NUSAP1/VKORC1L1/METTL2B/AAMP/MCM7/GPSM2/CFB/CSTF1/DPM1/HSPA9/MBTPS2/PSMB1/EIF2S2/EIF3E/TMEM97/AARS1/SRP72/HJURP/CD44/NOL8/ANXA5/PNPO/NPM1/PSMD4/PNPT1/SSB/WDR75/DAP3/MCM5/ADGRG1/PA2G4/MACROH2A1/HILPDA/ALG1/MLST8/TARS1/TALDO1/NOB1/DOLK/RCC1/PERP/SHISA5/KARS1/EIF6/CARHSP1/MRPL3/USP9X/CCT7/PTDSS1/POLR1D/HMGB2/TRAP1/CCT5/DNAJA3/LDHA/ABCB8/FAM210B/SRSF2/A…
Hiv infection	Hiv infection	231	-0.390672	-1.80745	5.617059692372797e-7	1.3397727562548447e-5	9.731309554768663e-6	5572	tags=44%, list=30%, signal=31%	ARF1/TAF9/POLR2E/PSMF1/XRCC6/NDC1/TAF9B/VPS37D/NPM1/GTF2A1/PSMD4/VPS4A/NUP88/TAF2/PSMD6/MNAT1/PSMD7/CHMP4A/GTF2E2/NUP37/PSMC2/TAF4B/SKP1/RCC1/AP1S2/PSMD8/NELFE/CCNK/RPS27A/GTF2H5/NUP54/B2M/CUL5/NUP205/TAF12/SEC13/SEH1L/HLA-A/PSMC6/PSMC5/AP1S1/PSMD10/AP1S3/GTF2H2/NUP85/TAF10/PSMA8/UBA52/RAN/APOBEC3G/PSMC3/POLR2I/PSMB4/PPIA/NUP35/PSMD12/PSMB7/TAF13/PSMA6/PSMA7/POLR2H/FEN1/RBX1/HMGA1/PSMB2/CHMP5/PSM…
B lymphocyte network	B lymphocyte network	143	-0.415064	-1.80747	4.451561606544622e-5	6.083407267086974e-4	4.418623903745954e-4	3778	tags=43%, list=20%, signal=34%	RFC4/TRIP13/RIPOR2/CASP4/EIF2S1/HHEX/EMG1/DESI1/RUVBL2/ETHE1/PSMB7/GABARAP/ASNS/CCNB1/EBNA1BP2/BUD31/AFG3L2/DDB2/POLD2/TIMM17A/POLR2H/FEN1/UCHL1/PSMB2/CYCS/PSMA3/PES1/H2AC18/MYL12A/PAICS/SNRPF/DBF4/PRDX3/ELOC/PSMD14/SLC25A4/NOP16/LSM3/PCNA/AHSA1/CDK1/MRPS12/SEM1/PSMB5/CCNA2/POLR2F/NDUFAB1/RPS26/SAT1/HSPE1/SSBP1/IFITM1/EEF1E1/HPRT1/UBE2S/MAD2L1/PRDX4/CYC1/QPCT/MRPL12/NME1
Nucleotide metabolism	Nucleotide metabolism	19	-0.63499	-1.80748	0.004561695496909081	0.025657047161654567	0.018635747519549283	3449	tags=42%, list=18%, signal=34%	IMPDH1/OAZ1/NME2/RRM2/SAT1/PRPS2/MTHFD2/HPRT1
Diseases of programmed cell death	Diseases of programmed cell death	100	-0.433016	-1.81173	4.116345357771624e-4	0.003800611341082331	0.002760537209371463	2986	tags=52%, list=16%, signal=44%	TRADD/H3C3/FADD/DNMT1/LMNB1/H3C6/H4C15/CAPN1/H4C6/H2BC8/H4C1/H2AC20/H3-3B/H2BC17/H4C5/PRIM1/CDC25C/H3C2/YWHAE/H3C1/H2BS1/CASP8/H2BC15/CDC25A/PRDX1/EZH2/H4C14/CDKN2A/H2AB1/H3C13/H2BC5/H3C12/H2AC4/CDK5/H2BC9/PRDX2/H4C3/POLA2/H3C10/EED/H4C13/H4C9/H2BC12/H2AZ1/H3C4/RBBP7/H2AJ/H3C8/H2BC11/C1QBP/H2AX/H2AC8
Cell cycle targets of tp53 and tp73 dn	Cell cycle targets of tp53 and tp73 dn	22	-0.614161	-1.81202	0.00751230658184405	0.03739459276295705	0.02716119999842929	4697	tags=64%, list=25%, signal=48%	KIF22/CDC25C/MCM6/RAN/UBE2C/DTYMK/AURKA/CCNB1/KIF23/MYC/CCNA2/CDC20/CDKN3/CKS2
Cholesterol biosynthesis pathway	Cholesterol biosynthesis pathway	15	-0.683767	-1.82093	0.0051004146750819514	0.027836161447057427	0.020218526059228747	4262	tags=60%, list=23%, signal=46%	FDPS/DHCR7/IDI1/SQLE/FDFT1/SC5D/PMVK/MSMO1/NSDHL
Extension of telomeres	Extension of telomeres	51	-0.50613	-1.82094	9.084872396578642e-4	0.0071240886738467525	0.005174512756522804	4707	tags=43%, list=25%, signal=32%	PRIM1/TINF2/DNA2/RFC3/RFC4/POLD4/RUVBL2/GAR1/PIF1/DKC1/POLD2/CCNA1/RFC2/FEN1/POLD3/NHP2/RPA3/PCNA/POLA2/DSCC1/CCNA2/NOP10
Regulation of pten stability and activity	Regulation of pten stability and activity	69	-0.470473	-1.82358	3.963243170607789e-4	0.0036826033397525017	0.0026748232414228806	3581	tags=58%, list=19%, signal=47%	PSMD4/PSMD6/PSMD7/STUB1/MKRN1/PSMC2/PSMD8/TRIM27/RPS27A/PSMC6/PSMC5/PSMD10/CSNK2B/PSMA8/UBA52/PSMC3/PREX2/PSMB4/PSMD12/PSMB7/PSMA6/PSMA7/AKT1/PSMB2/PSMA3/PSMC1/PSMA1/PSMD14/PSMB6/PSMA5/PSMB9/SEM1/PSMB10/PSMB5/PSMA4/PSMB8/PSME1/UBB/PSME2/PSMB3
Response to oxidized phospholipids turquoise dn	Response to oxidized phospholipids turquoise dn	54	-0.501521	-1.8237	6.080266672755795e-4	0.005203577059474726	0.003779567760385881	4925	tags=52%, list=26%, signal=38%	SKP2/PLCXD1/TTLL12/TACC3/BUB1B/E2F8/RRS1/ZNF93/BARD1/FAM111A/EXOSC2/GEMIN6/AURKA/CCDC51/PLK1/NDC80/F8A1/NEIL3/DDX28/PPP1R35/CDK2AP2/FAM111B/ELOVL6/CCNA2/TIMM8A/ENOSF1/CDC20/SPC24
Gastric cancer advanced vs early dn	Gastric cancer advanced vs early dn	139	-0.42266	-1.82444	1.4461318285744216e-5	2.3503063661878295e-4	1.707122248242427e-4	3322	tags=39%, list=18%, signal=32%	POLD4/GOT1/EIF3H/RPS27L/LPCAT4/ETHE1/DPP3/AK1/SERPINB1/DDT/SLPI/TMEM238L/DERL1/HMMR/DHRS11/SSNA1/GMDS/ALDH3A1/SMDT1/ESCO2/SMIM31/AKR1C3/TFF3/VPS28/NUDT6/SNRNP25/CFTR/ABCG5/CHCHD5/CAPN13/PRADC1/KCNE3/PCBD1/CHCHD10/ISG20/HGD/STARD10/COX8A/NMU/CYC1/SYBU/REG3A/CHAC2/AADAC/PRSS2/TMEM45B/ELAPOR1/PLAAT2/MS4A8/VSIG2/BCL2L15/TFF2/SST/GP2
Lagging strand synthesis	Lagging strand synthesis	20	-0.635537	-1.82629	0.0023606431868891504	0.01512690758563794	0.01098728270409915	4707	tags=60%, list=25%, signal=45%	PRIM1/DNA2/RFC3/RFC4/POLD4/POLD2/RFC2/FEN1/POLD3/RPA3/PCNA/POLA2
Trna aminoacylation	Trna aminoacylation	42	-0.527212	-1.82828	0.0019231085828050392	0.01296839714477953	0.009419469567197459	6538	tags=64%, list=35%, signal=42%	LARS2/YARS1/IARS2/DARS2/AIMP1/VARS2/NARS1/AARS1/FARSA/WARS2/RARS1/SARS1/AIMP2/FARSB/IARS1/TARS1/FARS2/KARS1/PARS2/YARS2/CARS2/MARS2/WARS1/NARS2/PPA1/PPA2/EEF1E1
Digestion of dietary carbohydrate	Digestion of dietary carbohydrate	11	-0.742129	-1.82857	0.004769065229833008	0.02639121811396311	0.019169005474652435	993	tags=64%, list=5%, signal=60%	LCT/AMY2A/CHIT1/CHIA/AMY1A/AMY1C/AMY1B
M phase	M phase	413	-0.37354	-1.83001	4.5699971791583704e-10	2.065318023423151e-8	1.5001237277846728e-8	5242	tags=41%, list=28%, signal=30%	MASTL/PSMD4/VPS4A/H4C6/H2BC8/NUP88/HAUS1/H4C1/PSMD6/ZWILCH/PSMD7/CHMP4A/H2AC20/H3-3B/CENPE/NUP37/USO1/H2BC17/H4C5/PSMC2/TUBGCP5/TUBB8/TUBG1/RCC1/PSMD8/BUB1B/BUB3/OFD1/CEP41/BUB1/RPS27A/KIF2C/ENSA/UBE2E1/H3C2/ITGB3BP/YWHAE/NCAPG/TUBA1B/ANAPC16/NUP54/H3C1/CEP76/NCAPG2/TUBA4A/KIF20A/TUBA3C/RAD21/H2BS1/CDC26/NUP205/RPS27/SEC13/TUBA1C/SEH1L/HAUS8/PSMC6/RAB1B/ZW10/PSMC5/PMF1/CENPI/NEK2/SUMO1/PSMD10/NUP…
Aging hypothalamus up	Aging hypothalamus up	46	-0.520173	-1.83141	5.172284559972288e-4	0.004531906471594767	0.00329170633918752	3064	tags=48%, list=16%, signal=40%	NDUFB5/ANP32B/PRDX1/PSMA6/ATP5F1C/ATP5PO/TBCA/PSMD14/ATP5IF1/BTG3/SOD1/PPA1/CASP6/PSMA4/NDUFA1/HSPE1/COX7A2/NDUFC1/C1QBP/MT1A/ATP5MG/SST
Meiotic recombination	Meiotic recombination	84	-0.456952	-1.83412	2.143383769633731e-4	0.0022862760209426463	0.0016606144276011582	5805	tags=52%, list=31%, signal=36%	H3C3/SPO11/RAD51C/H3C6/H4C15/H4C6/H2BC8/H4C1/MLH3/H2AC20/H3-3B/H2BC17/H4C5/MRE11/RBBP8/H3C2/H3C1/CDK4/H2BS1/PRDM9/H2BC15/RAD51/H4C14/MND1/H2AB1/H3C13/RPA3/H2BC5/H3C12/H2AC4/H2BC9/H4C3/H3C10/H4C13/H4C9/H2BC12/H2AZ1/H3C4/H2AJ/H3C8/H2BC11/H2AX/H2AC8/DMC1
Response to imiquimod	Response to imiquimod	19	-0.644965	-1.83588	0.003348251145477204	0.020011821231436838	0.014535392382673661	4354	tags=84%, list=23%, signal=65%	STAT1/MICB/IRF7/SECTM1/OAS2/OASL/CCL8/IFI35/MX1/ISG20/IFITM1/IDO1/PLAAT4/CXCL11/IFI6/ISG15
Zinc homeostasis	Zinc homeostasis	35	-0.558411	-1.83842	6.05823482193216e-4	0.005193348719233692	0.0037721385045921415	1185	tags=31%, list=6%, signal=29%	MT1X/MT1F/SLC39A4/MT1E/MT1M/MT1A/MT3/MT1H/MT1G/SLC39A2/MT1B
Nonalcoholic fatty liver disease	Nonalcoholic fatty liver disease	154	-0.423779	-1.83891	1.056655553318753e-5	1.796663171847596e-4	1.3049888803363444e-4	3885	tags=47%, list=21%, signal=37%	VMP1/NDUFS4/NDUFA5/CASP8/COX6A2/CASP3/PRKAG2/COX6B1/EIF2S1/ATF4/COX7C/XBP1/SDHC/SDHB/NDUFB5/NDUFB11/NDUFA9/NDUFC2-KCTD14/NDUFA4/UQCRC1/NDUFB10/CCL2/PIK3R3/AKT1/NDUFV2/NDUFA12/NDUFB4/CYCS/MT-CO2/NDUFB6/NDUFB7/NDUFV3/CXCL8/UQCR11/NDUFA2/COX4I1/COX5B/BID/NDUFS3/NDUFB8/NDUFB3/NDUFV1/UQCRB/NDUFA8/COX6A1/COX5A/UQCRHL/NDUFAB1/NDUFA6/NDUFB9/NDUFS5/NDUFA1/COX7A2/UQCRH/SDHA/COX6C/UQCR10/SDHD/NDUFC1/NDUFB2/…
Pre bi lymphocyte up	Pre bi lymphocyte up	80	-0.46282	-1.84061	2.0639414476035324e-4	0.0022106915463728483	0.0016057143771157807	4540	tags=50%, list=24%, signal=38%	E2F8/PSAT1/KIF4A/ADGRG3/TTK/PHGDH/HNRNPAB/TUBA1B/HSPBP1/MCM6/HMGN2/RAN/UBE2C/AURKA/RAD51/TUBB4B/MELK/RRM2/NDC80/SQLE/CDCA5/DBI/CDCA3/DNTT/TXN/CKS1B/H2AC4/MIF/CDK1/CCNB2/HMGB3/RAMP1/KPNA2/CDC20/PRC1/MTHFD2/PRDX4/CDCA7/H2AX/MGST2
Regulation of innate immune responses to cytosolic dna	Regulation of innate immune responses to cytosolic dna	14	-0.702244	-1.84097	0.004360654245593119	0.024769669981582965	0.017991209705893973	923	tags=43%, list=5%, signal=41%	TRIM21/RPS27A/UBA52/UBB/ZBP1/NLRP4
Rrna modification in the nucleus and cytosol	Rrna modification in the nucleus and cytosol	59	-0.495136	-1.84321	3.172795584762558e-4	0.0031314641480261877	0.002274508631544847	5967	tags=63%, list=32%, signal=43%	WDR43/NAT10/RRP36/PNO1/UTP18/DIMT1/UTP4/NOP58/WDR75/UTP14A/NOP14/RPS7/IMP4/DDX49/NOL11/RPS14/RCL1/RPS6/RRP9/BUD23/UTP3/RPS2/FCF1/DCAF13/EMG1/UTP11/GAR1/DKC1/RPS9/NOP56/RRP7A/NHP2/SNU13/IMP3/PWP2/TRMT112/NOP10
Dual incision in tc ner	Dual incision in tc ner	65	-0.481047	-1.84322	7.316888848428906e-4	0.006012218715646846	0.004366916789417403	4232	tags=38%, list=23%, signal=30%	RPS27A/GTF2H5/RFC3/RFC4/POLD4/GTF2H2/UBA52/HMGN1/POLR2I/POLD2/POLE3/RFC2/POLR2H/RBX1/POLD3/POLR2J/POLE2/RPA3/POLR2K/PCNA/POLR2F/POLR2G/POLR2L/POLE4/UBB
Pgc	Pgc	418	-0.374867	-1.84452	3.3317017744186514e-10	1.560447958345899e-8	1.1334162495749575e-8	4527	tags=43%, list=24%, signal=34%	FARS2/MRPL18/PDHB/CARHSP1/UCK2/PRELID3B/RNF5/TFB2M/PGAM1/AMACR/NDUFAF1/NINJ1/DNAJA3/LDHA/MRPS18A/GAPDH/USP2/SLC25A20/COMT/GSTO1/BSG/PHB2/HSPBP1/HSPA5/NDUFA5/NIPSNAP2/GRSF1/ACOT13/LCN2/ACADS/MAIP1/EMC2/IFI16/PKM/STK16/GPX4/ACOT7/CLPP/MSRB1/UROD/MRPL39/COX7C/DGAT1/DLD/SUMO1/ATP6V0E2/MTX1/MRPS18B/MTCH2/SPSB2/RUVBL2/FAM162A/CIAO2B/SDHB/ATP5F1A/NDUFB5/TFRC/SUCLG1/WDR61/AK1/MT2A/ST6GALNAC4/UQCRC1/PSMB7…
Gap filling dna repair synthesis and ligation in gg ner	Gap filling dna repair synthesis and ligation in gg ner	25	-0.599928	-1.84506	0.001157647574989206	0.008606349648404602	0.0062511386482670735	4232	tags=56%, list=23%, signal=43%	RPS27A/RFC3/RFC4/POLD4/UBA52/POLD2/POLE3/RFC2/POLD3/POLE2/RPA3/PCNA/POLE4/UBB
Metabolism of cofactors	Metabolism of cofactors	19	-0.648331	-1.84546	0.003123539798573683	0.01884364993237894	0.013686902482348632	3246	tags=53%, list=17%, signal=44%	IDH1/PDSS1/AKT1/CALM1/HSP90AA1/COQ6/COQ9/SPR/COQ2/PTS
Slbp dependent processing of replication dependent histone pre mrnas	Slbp dependent processing of replication dependent histone pre mrnas	11	-0.74971	-1.84725	0.003740894807266398	0.021838694323824136	0.015862323945978016	2800	tags=55%, list=15%, signal=46%	SNRPE/SNRPF/SNRPB/SLBP/SNRPG/LSM10
Ovarian cancer low grade dn	Ovarian cancer low grade dn	19	-0.649419	-1.84856	0.003123539798573683	0.01884364993237894	0.013686902482348632	4354	tags=58%, list=23%, signal=45%	STAT1/TUBA1B/RAD21/MCM6/UVRAG/PCCB/SNRPB/CFL1/RHEB/CCNB2/JTB
Transcriptional regulation by small rnas	Transcriptional regulation by small rnas	104	-0.441271	-1.85086	9.237890333466021e-5	0.0011386031339238503	8.270133501755656e-4	5596	tags=49%, list=30%, signal=35%	AGO2/POLR2E/H3C6/H4C15/NDC1/H4C6/H2BC8/NUP88/H4C1/H2AC20/H3-3B/NUP37/H2BC17/H4C5/H3C2/NUP54/H3C1/H2BS1/NUP205/SEC13/SEH1L/NUP85/RAN/POLR2I/H2BC15/NUP35/H4C14/POLR2H/POLR2J/H2AB1/H3C13/H2BC5/H3C12/H2AC4/H2BC9/POLR2K/H4C3/H3C10/H4C13/POLR2F/POLR2G/H4C9/H2BC12/H2AZ1/POLR2L/H3C4/H2AJ/H3C8/H2BC11/H2AX/H2AC8
Positive epigenetic regulation of rrna expression	Positive epigenetic regulation of rrna expression	103	-0.441903	-1.85091	7.87073669694661e-5	9.890252551870472e-4	7.18368907770095e-4	5805	tags=47%, list=31%, signal=32%	H3C3/DDX21/MTA2/POLR2E/H3C6/H4C15/CHD4/H4C6/H2BC8/H4C1/H2AC20/H3-3B/H2BC17/POLR1G/H4C5/POLR1D/H3C2/H3C1/H2BS1/POLR1C/MTA1/H2BC15/H4C14/POLR2H/POLR1H/H2AB1/H3C13/H2BC5/H3C12/H2AC4/H2BC9/POLR2K/H4C3/H3C10/TAF1D/H4C13/POLR2F/H4C9/H2BC12/H2AZ1/POLR2L/H3C4/RBBP7/H2AJ/H3C8/H2BC11/H2AX/H2AC8
Negative epigenetic regulation of rrna expression	Negative epigenetic regulation of rrna expression	106	-0.439373	-1.85209	3.259660188339189e-5	4.6779301644355164e-4	3.397769233117085e-4	5583	tags=46%, list=30%, signal=33%	SAP30BP/POLR2E/H3C6/H4C15/RRP8/H4C6/H2BC8/H4C1/MNAT1/MBD2/H2AC20/H3-3B/H2BC17/POLR1G/H4C5/POLR1D/H3C2/GTF2H5/H3C1/H2BS1/POLR1C/GTF2H2/H2BC15/H4C14/POLR2H/POLR1H/SAP18/H2AB1/H3C13/H2BC5/H3C12/H2AC4/H2BC9/POLR2K/H4C3/H3C10/TAF1D/H4C13/POLR2F/H4C9/H2BC12/H2AZ1/POLR2L/H3C4/H2AJ/H3C8/H2BC11/H2AX/H2AC8
Steroid biosynthesis	Steroid biosynthesis	26	-0.598106	-1.85746	0.0013509636728335252	0.009748130031426222	0.007080459762528649	2340	tags=54%, list=12%, signal=47%	DHCR24/SQLE/FDFT1/SC5D/EBP/MSMO1/CPN1/HSD17B3/NSDHL/CYP17A1/F13B/HSD17B1/HSD3B1/CEL
Pyrimidine metabolism	Pyrimidine metabolism	102	-0.443871	-1.86103	1.2453751768765414e-4	0.0014315167862376083	0.0010397683424065662	3412	tags=38%, list=18%, signal=31%	DCK/NME5/POLD4/TXNRD2/DTYMK/ITPA/POLR2I/POLD2/NME2/POLE3/RRM2/POLR2H/CTPS2/POLR1H/POLD3/NT5C3A/PNP/NUDT2/POLR2J/POLE2/CMPK2/DUT/POLR2K/POLA2/NT5C/POLR3K/NME3/TYMS/POLR2F/POLR2G/DCTPP1/DPYS/UPP1/POLR2L/NT5M/POLE4/TK1/ENPP3/NME1
Resolution of abasic sites ap sites	Resolution of abasic sites ap sites	38	-0.549558	-1.86281	8.179650807829841e-4	0.0065641060688379025	0.004767774819123641	5485	tags=55%, list=29%, signal=39%	NEIL1/NTHL1/UNG/SMUG1/RFC3/PNKP/RFC4/POLD4/MPG/PARP2/POLD2/POLE3/RFC2/FEN1/POLD3/APEX1/ADPRS/POLE2/RPA3/PCNA/POLE4
Rna polymerase i transcription	Rna polymerase i transcription	108	-0.439839	-1.86515	6.024389583251648e-5	7.897622171224552e-4	5.736361314707274e-4	5555	tags=46%, list=30%, signal=33%	POLR2E/H3C6/H4C15/CHD4/RRN3/H4C6/H2BC8/H4C1/MNAT1/MBD2/H2AC20/H3-3B/H2BC17/POLR1G/H4C5/POLR1D/H3C2/GTF2H5/H3C1/H2BS1/POLR1C/MTA1/GTF2H2/H2BC15/H4C14/POLR2H/POLR1H/H2AB1/H3C13/H2BC5/H3C12/H2AC4/H2BC9/POLR2K/H4C3/H3C10/TAF1D/H4C13/POLR2F/H4C9/H2BC12/H2AZ1/POLR2L/H3C4/RBBP7/H2AJ/H3C8/H2BC11/H2AX/H2AC8
Immune response to tuberculosis	Immune response to tuberculosis	23	-0.62214	-1.86929	0.0018173996147666802	0.01240164611295091	0.009007815448582153	4730	tags=61%, list=25%, signal=46%	IFNGR2/STAT1/IRF9/IFNAR2/PTPN2/OAS1/TAP1/IRF1/IFI35/MX1/PSMB8/IFIT3/IFITM1/IFIT1
Stat3 targets dn	Stat3 targets dn	47	-0.529672	-1.87004	6.151961827834378e-4	0.005256203538474746	0.0038177924933143438	3716	tags=55%, list=20%, signal=44%	TDRD7/ST8SIA4/IRF7/TLR3/OAS2/PGRMC2/OAS1/DDX60/DDX58/OASL/PARP12/HERC6/LAMP3/SAMD9/IFI35/IFIH1/LAP3/IFI44/MX1/USP18/IFIT3/IFITM1/IFIT1/ISG15/IFI27/HPGD
Large to small pre bii lymphocyte up	Large to small pre bii lymphocyte up	152	-0.430565	-1.87529	1.674731233500976e-6	3.633972392305001e-5	2.63950062411006e-5	4986	tags=49%, list=27%, signal=36%	ANLN/CRIP2/AZIN1/ENO1/PIH1D1/CENPE/GSPT1/HES1/KIF22/CDC25C/WDHD1/E2F8/HOXC5/DNA2/KIF4A/BUB1/HMGB2/KIF2C/TTK/LDHA/TUBA1B/RFC3/KIF20A/RAD54L/MCM6/TRIP13/CASP3/NEK2/FAM111A/SGO1/PSMC3/UBE2C/ANP32B/AURKA/RAD51/CCNB1/TUBB4B/MELK/PLK4/RRM2/FEN1/CENPA/CHAF1B/NDC80/CDCA5/DBF4/DLGAP5/KIF23/CDCA3/CKS1B/H2AC4/AURKB/PPP1CA/CAMP/PCK2/CDK1/CCNB2/HMGB3/CCNA2/RAMP1/UBE2T/DCTPP1/KPNA2/CDC20/CDC45/ACY1/PRC1/TK1/MT…
Colorectal cancer myc up	Colorectal cancer myc up	82	-0.468631	-1.87676	1.340517283797333e-4	0.001524579480380543	0.0011073635282675776	5213	tags=49%, list=28%, signal=35%	PNPT1/SLCO4A1/SLC25A15/MECR/SRM/PRPS1L1/ENO1/SLC25A14/PRIM1/POLR1D/GART/CDK4/CTPS1/AGK/IMPDH1/PPAT/DTYMK/POLR2I/ASNS/AHCY/POLD2/POLE3/PYCR1/POLR1H/ENOPH1/SLC25A19/PAICS/GNPNAT1/POLE2/LDHB/DUT/POLA2/POLR3K/TYMS/TST/PRPS2/PYCR3/MTHFD2/HPRT1/NME1
Response to ifng up	Response to ifng up	74	-0.477173	-1.8797	1.2475757706146857e-4	0.0014315167862376083	0.0010397683424065662	4777	tags=51%, list=25%, signal=38%	CD274/BATF2/GBP3/APOL3/STAT1/HLA-B/HLA-C/PARP9/SAMD9L/SLC25A28/ST8SIA4/HLA-A/OAS2/GBP4/OAS1/BST2/WARS1/CEACAM1/APOL4/DDX60/GBP1/ATP6V0A4/IFI35/LGALS3BP/IFIH1/LAP3/IFI44L/APOL2/MX1/RAC3/UBE2L6/ETV7/IDO1/UBD/APOL1/PLAAT4/CXCL11/CXCL10
Melo covid19 sars cov 2 infection a594 cells dn	Melo covid19 sars cov 2 infection a594 cells dn	73	-0.479845	-1.88261	1.7979842144316116e-4	0.001946053502678921	0.0014134970991385182	2403	tags=36%, list=13%, signal=31%	FEN1/DHCR24/PDF/RECQL4/MXD3/GPX2/SPEF1/FAM111B/RIBC2/SPDEF/HPDL/TK1/SLC25A10/SDF2L1/VIL1/H2AX/SP9/INSL4/TM4SF4/DDC/SYNGR4/NRGN/HABP2/SERPINA6/ANKS4B/SOX2
Mitotic g1 phase and g1 s transition	Mitotic g1 phase and g1 s transition	149	-0.433102	-1.88296	3.0886858947135842e-6	6.264925090379679e-5	4.5504676152949836e-5	5239	tags=51%, list=28%, signal=37%	PSMD4/TFDP1/PSMD6/MNAT1/PSMD7/MCM5/SKP2/ORC5/PRIM1/PSMC2/SKP1/PSMD8/CUL1/RPS27A/RPA4/CCNE2/CDK4/MCM4/MCM6/PSMC6/PSMC5/MYBL2/CDC6/PSMD10/UBA52/PSMC3/ORC1/PSMB4/CDC7/PSMD12/PSMB7/CDC25A/CCNB1/PPP2R3B/PSMA6/PSMA7/AKT1/CDKN2A/POLE3/CCNA1/RRM2/PSMB2/PSMA3/PPP2R1B/DBF4/CDT1/PSMC1/PSMA1/ORC6/POLE2/PSMD14/CDKN2D/MYC/RPA3/CKS1B/PSMB6/PCNA/POLA2/PSMA5/CDK1/PSMB9/SEM1/TYMS/PSMB10/PSMB5/CCNA2/GMNN/PSMA4/CDC4…
Dual incision in gg ner	Dual incision in gg ner	41	-0.544927	-1.88515	6.679798262681798e-4	0.005585289737408978	0.0040568210641731195	4232	tags=46%, list=23%, signal=36%	RPS27A/GTF2H5/RFC3/RFC4/POLD4/GTF2H2/UBA52/PARP2/DDB2/POLD2/POLE3/RFC2/RBX1/POLD3/POLE2/RPA3/PCNA/POLE4/UBB
Prc2 methylates histones and dna	Prc2 methylates histones and dna	70	-0.486055	-1.88678	4.2469050983085774e-4	0.0038932482324707815	0.002827823117528937	2572	tags=31%, list=14%, signal=27%	EZH2/H4C14/H2AB1/H3C13/H2BC5/H3C12/H2AC4/H2BC9/H4C3/H3C10/EED/H4C13/H4C9/H2BC12/H2AZ1/H3C4/RBBP7/H2AJ/H3C8/H2BC11/H2AX/H2AC8
Pancreatic exocrine progenitor	Pancreatic exocrine progenitor	11	-0.766573	-1.8888	0.0025865769191595212	0.01625127352135348	0.011803955003353146	1067	tags=55%, list=6%, signal=51%	HNF4A/ONECUT1/PTF1A/HNF1B/MNX1/PDX1
Myc targets and serum response up	Myc targets and serum response up	48	-0.529288	-1.89019	2.5110487846273716e-4	0.00260825067306456	0.0018944775953629684	4464	tags=50%, list=24%, signal=38%	GSPT1/METAP1/PRMT1/UCK2/PTDSS1/CCDC86/COMT/SRSF2/BAG1/VDAC1/FXN/RCN1/SLC1A5/THOP1/ATP1B3/TMED3/SNRPB/MYC/ZPR1/LSM7/EIF1AX/GRPEL1/ZNRD2/NME1
Liver cancer subclass g3 up	Liver cancer subclass g3 up	190	-0.424778	-1.89386	3.907555721008238e-7	1.001578461424599e-5	7.274868074461528e-6	5583	tags=47%, list=30%, signal=34%	SAP30BP/PFN2/HJURP/GTF3C3/NGRN/NDC1/TRIM31/FAM50A/UTP18/CYB5B/TAF2/SRM/LRRC59/ZWILCH/PGD/ENO1/KLC1/NUP37/GNL3/PRIM1/TPD52/RAD51AP1/USP14/TACC3/FTH1/UCK2/PPP2R3C/MRTO4/BUB1/MPV17/KIF2C/TTK/CCT5/CCDC86/NOL11/NCAPG/RFC3/COPS5/TMX1/VMP1/RAD21/PAPOLA/TRIP13/PIGF/PSMC6/EIF2S1/AGA/SRI/CDC6/PLEKHF2/EIF3H/SUB1/GLA/CLIC1/FANCI/BOP1/SLC52A2/PHLDA2/PAK1IP1/DKC1/ARPC4/NTAQ1/EBNA1BP2/PGK1/EZH2/EIF4A3/MELK/NME2…
Cyclin a cdk2 associated events at s phase entry	Cyclin a cdk2 associated events at s phase entry	85	-0.470512	-1.89446	6.860428243600024e-5	8.814196087537986e-4	6.402105894736341e-4	5507	tags=58%, list=29%, signal=41%	PSMF1/E2F1/LIN54/PSMD4/TFDP1/PSMD6/MNAT1/PSMD7/SKP2/PSMC2/SKP1/PSMD8/CUL1/RPS27A/CCNE2/CDK4/PSMC6/PSMC5/PSMD10/UBA52/PSMC3/PSMB4/PSMD12/PSMB7/CDC25A/PSMA6/PSMA7/AKT1/CCNA1/PSMB2/PSMA3/PSMC1/PSMA1/PSMD14/MYC/CKS1B/PSMB6/PSMA5/PSMB9/SEM1/PSMB10/PSMB5/CCNA2/PSMA4/PSMB8/PSME1/UBB/PSME2/PSMB3
Intestine probiotics 6hr up	Intestine probiotics 6hr up	50	-0.525991	-1.89597	4.6836744910805356e-4	0.004203883445652774	0.003053449993726628	5089	tags=58%, list=27%, signal=42%	ALDH3B1/FAM120A/RPS11/RPL4/RPS7/RPL37A/GAPDH/RPS14/B2M/RPLP0/RPL13/RPS6/RPS27/RPS3A/RPS2/HSPA8/SORL1/RPL41/PPIA/RPL27A/RPS24/RPS19/RPL23A/PGK1/RPL23/RPS17/RPL39/MYC/EIF5A
Docetaxel resistance	Docetaxel resistance	35	-0.575901	-1.896	3.290547096978924e-4	0.0031926362794040333	0.0023189404162474135	4114	tags=54%, list=22%, signal=42%	TUBA1B/GAPDH/PDCD5/HSPA5/COX7C/DYNLL1/SQOR/MYDGF/CFL1/MRPL17/NDUFS3/ATP5F1E/RPL38/MX1/PPP1R14B/MRPS6/APRT/GSTP1/IFI6
Response to arsenite up	Response to arsenite up	15	-0.712672	-1.89791	0.00235478551148744	0.015108163082420039	0.010973667815871863	1185	tags=40%, list=6%, signal=38%	MT1X/MT1E/MT1M/MT1H/MT1G/MT1B
Targets of myc and tfrc dn	Targets of myc and tfrc dn	45	-0.545417	-1.89924	2.674400447276744e-4	0.002723025909954503	0.0019778434761948877	4541	tags=67%, list=24%, signal=51%	FOXM1/CHAF1A/BUB1B/DNA2/TMEM107/RAD1/CD151/MYBL2/CDC6/FAM181B/TFRC/ARHGAP11A/AURKA/ERCC6L/CCNB1/PLK4/FAM72C/DBF4/DEPDC1/MND1/POLE2/CKS1B/AURKB/CDK1/DEPDC1B/SPC25/CCNA2/CDC20/RANBP1/BIRC5
Cholesterol biosynthesis	Cholesterol biosynthesis	25	-0.617946	-1.90047	6.393039246354549e-4	0.005426184217004719	0.003941256311591161	4409	tags=56%, list=23%, signal=43%	HSD17B7/FDPS/ARV1/DHCR7/IDI1/TM7SF2/DHCR24/SQLE/FDFT1/SC5D/EBP/PMVK/MSMO1/NSDHL
Sm pathway	Sm pathway	14	-0.72496	-1.90052	0.0018358298011933673	0.012494313257263181	0.009075123330657612	4028	tags=71%, list=21%, signal=56%	SRSF2/SNRPB2/SNRPC/SNRPE/SNRPF/SNRPD2/SNRPB/SNRPD1/SNRPG/SNRPA1
Dna damage bypass	Dna damage bypass	48	-0.532341	-1.9011	2.3862778205904596e-4	0.002498801490179278	0.001814980242233437	4232	tags=48%, list=23%, signal=37%	UBA7/USP1/MAD2L2/RPS27A/RFC3/RFC4/RCHY1/POLD4/UBA52/UFD1/POLD2/POLE3/RFC2/RBX1/POLD3/POLE2/RPA3/PCNA/UBE2L6/POLE4/UBB/PCLAF/ISG15
Glycosylation and related congenital defects	Glycosylation and related congenital defects	25	-0.618761	-1.90298	6.162665802160581e-4	0.005256631492174058	0.0038181033333358084	5161	tags=72%, list=28%, signal=52%	ALG3/ALG14/ALG1/ALG9/DOLK/ALG6/B4GALT1/GMPPB/ALG2/ALG13/MPI/DPM2/MAGT1/MPDU1/DPAGT1/ALG8/DPM3/SRD5A3
Melo bronchial epithelial cells influenza a infection dn	Melo bronchial epithelial cells influenza a infection dn	78	-0.482833	-1.90609	5.767435434096653e-5	7.618930091401528e-4	5.533936023809339e-4	3758	tags=47%, list=20%, signal=38%	TPGS1/CCDC74A/ZNF524/TM7SF2/ANXA9/ATP6V0E2/TMEM125/RHPN1/TMEM160/CTU1/CCDC34/RBP1/SLC25A29/PDF/ANKRD9/AIF1L/EMP2/MND1/RPL39/RECQL4/BSPRY/SMIM5/FAM111B/CDC45/C15orf61/CCDC96/UBE2S/TGFBR3L/SNCG/CALB1/C10orf95/PCLAF/ANPEP/COMTD1/LGALS7B/NUDT8/VSIG2
Condensation of prophase chromosomes	Condensation of prophase chromosomes	71	-0.486836	-1.90615	7.933717580506113e-5	9.945136976829076e-4	7.223553847790814e-4	5552	tags=54%, list=30%, signal=38%	NCAPH2/H3C6/H4C15/H4C6/H2BC8/H4C1/H2AC20/H3-3B/H2BC17/H4C5/H3C2/H3C1/NCAPG2/H2BS1/H2BC15/NCAPD3/CCNB1/H4C14/PLK1/H2AB1/H3C13/H2BC5/H3C12/H2AC4/H2BC9/H4C3/H3C10/CDK1/H4C13/H4C9/H2BC12/H2AZ1/H3C4/H2AJ/H3C8/H2BC11/H2AX/H2AC8
Inhibition of the proteolytic activity of apc c required for the onset of anaphase by mitotic spindle checkpoint components	Inhibition of the proteolytic activity of apc c required for the onset of anaphase by mitotic spindle checkpoint components	21	-0.657449	-1.90684	0.0010824831825102217	0.008213480642551785	0.0059657820538312365	4541	tags=57%, list=24%, signal=43%	BUB1B/BUB3/UBE2E1/ANAPC16/CDC26/UBE2C/ANAPC10/CDC20/ANAPC15/UBE2S/MAD2L1/ANAPC11
Inhibition of dna recombination at telomere	Inhibition of dna recombination at telomere	65	-0.498614	-1.91053	3.3125065673745576e-4	0.0032034938858718307	0.0023268267334656664	3045	tags=34%, list=16%, signal=28%	POLR2I/H2BC15/H4C14/POLR2H/POLR2J/H2AB1/H2BC5/H2AC4/H2BC9/POLR2K/H4C3/H4C13/POLR2F/POLR2G/H4C9/H2BC12/H2AZ1/POLR2L/H2AJ/H2BC11/H2AX/H2AC8
Genotoxic damage 4hr	Genotoxic damage 4hr	36	-0.575583	-1.91126	4.3761074570710924e-4	0.003990390375014207	0.0028983813711947345	4986	tags=61%, list=27%, signal=45%	ANLN/ORC5/KIF22/CDC25C/BUB1/CUL1/FAM76B/TCF19/IFNAR2/NEK2/HMGN1/AURKA/CDT1/H2AC19/TNNC1/KPNA2/CDC20/PRC1/MTHFD2/PTTG1/H2AX/CKS2
Targets of pax8 pparg fusion	Targets of pax8 pparg fusion	34	-0.58449	-1.91197	3.96709016607655e-4	0.0036826033397525017	0.0026748232414228806	5094	tags=62%, list=27%, signal=45%	TMEM147/EIF3K/SARS1/EIF3G/SRSF3/RPL18/SKP1/RPS12/DNAJA1/B2M/RPS2/HSPA8/RAN/ATP5F1A/RPL18A/CLDN7/UQCR11/RPS5/HINT1/RPL17/HLA-G
E2a targets up	E2a targets up	33	-0.588829	-1.91203	3.1858743225443304e-4	0.0031364672159125196	0.0022781425614107976	6812	tags=79%, list=36%, signal=50%	SLC7A5/SCIN/FGFR2/CIP2A/RACGAP1/NUSAP1/KIF11/ECT2/PFKP/ANLN/CA2/KIF4A/BUB1/PTGS1/KIF2C/TTK/TCEAL9/EIF4EBP1/AURKA/CCNB1/PGK1/PLK4/CCNB2/CCNA2/MAD2L1/H2AX
Dna methylation	Dna methylation	62	-0.509265	-1.91336	1.4169829170374796e-4	0.0016009421027581348	0.001162828778870785	1875	tags=55%, list=10%, signal=50%	H3C3/DNMT1/H3C6/H4C15/H4C6/H2BC8/H4C1/H2AC20/H3-3B/H2BC17/H4C5/H3C2/H3C1/H2BS1/H2BC15/H4C14/H2AB1/H3C13/H2BC5/H3C12/H2AC4/H2BC9/H4C3/H3C10/H4C13/H4C9/H2BC12/H2AZ1/H3C4/H2AJ/H3C8/H2BC11/H2AX/H2AC8
[truncated: 192 more rows]
