# Supplementary material for: Identification of heme metabolism-related biomarkers in ovarian cancer and construction of a prognostic model via bulk RNA-Seq analysis
Source: Research Square preprint supplement (doi:10.21203/rs.3.rs-8411969/v1), 2026-01-08
Supplement: Supplementary file 8 [file bd7e1e91304c29608d4dc9fd.xlsx]

## Sheet: Online Resource 2
Gene	log2FC	AveExpr	t	P_Value	Padj	B	Significant	size_value
C16orf45	6.018442294303765	10.61425055711805	45.74487145263404	2.1532576230406998e-51	4.926438115754818e-47	104.38211218700698	Up	46.30746696830001
BEST1	4.540616568930318	11.41652221893462	37.14202238121347	1.0829667191690717e-45	1.2158333031331309e-41	92.50301983368048	Up	40.91512596494166
RNF187	4.793345489821061	10.56776663089189	29.43278091664448	1.8790757266279276e-39	7.16522892492006e-36	79.00805548528909	Up	35.14476992958746
SLC5A1	4.438278966001474	8.428676454057978	29.24726102412304	2.7611919525220417e-39	9.024758668821686e-36	78.64098213447008	Up	35.04456440274091
PAK1	5.56048553906883	9.512629036677192	27.800793746691745	5.976361010888125e-38	1.7091645446013675e-34	75.6997528144233	Up	33.76721612489047
RTP3	4.18191313929888	9.023496909290268	24.465654904636185	1.238297841295833e-34	2.5755469373643063e-31	68.33438581830269	Up	30.58913053102799
NS3BP	2.089880695415778	7.674979636791321	24.39073737828391	1.4841546873086111e-34	2.764376994585982e-31	68.15876072247913	Up	30.55840272992892
SETD5	3.552514790723741	11.415934660421849	24.358130230555307	1.606102953030852e-34	2.764376994585982e-31	68.08217324470765	Up	30.55840272992892
LOC283692	3.781969326293384	7.222524261139851	23.764402213704496	6.86676414190441e-34	9.819043550164435e-31	66.67169957849353	Up	30.007930813752335
ELL3	4.313647429758236	10.45805437880858	23.388557224724373	1.748638378585732e-33	2.3533586743331148e-30	65.7629426738982	Up	29.628311877153504
NDUFV1	2.89868958841012	11.473586415631084	20.209190494107993	7.862219808368126e-30	7.820857695463234e-27	57.544422883687325	Up	26.10674561625206
HMGA1	4.730504115229011	11.564411237560284	19.669084201402764	3.614422738042199e-29	3.1805529932179796e-26	56.04683076426374	Up	25.497497363970357
RBM8A	3.1309486247716887	11.588523365090584	18.936811787720252	3.0013097537698747e-28	2.1458426830156547e-25	53.965673638229184	Up	24.6684021203955
HAGLR	3.696228309716536	9.751332605432934	18.645955685794796	7.068963323368503e-28	4.756788584569058e-25	53.122422529655005	Up	24.322686150365975
NFIA-AS2	4.628845817114977	11.629926849416393	18.32729450377052	1.8263442080738297e-27	1.1293224090951663e-24	52.18747573763214	Up	23.94718205408753
MB21D1	7.736833449939832	10.228120236120224	18.29928818017522	1.986302374744319e-27	1.1959108429414544e-24	52.10474612364779	Up	23.922301196486277
KCNH2	2.9704198904288415	9.819890011970006	18.24460920975515	2.3406890919233577e-27	1.3731442495926791e-24	51.94296437486816	Up	23.862283837481773
MIR6778	2.92151195822343	11.940241865658674	18.230876449605695	2.4393450672407534e-27	1.39524439483503e-24	51.90227793011318	Up	23.855349713514478
LRRC18	3.836224013510684	8.443863377871423	18.051613442278445	4.189480411157058e-27	2.337832251874691e-24	51.36915374657317	Up	23.631186654294286
WNK2	1.9072551676788567	7.684762272268451	17.81429248778647	8.62064007445689e-27	4.6959910538928374e-24	50.65756712504562	Up	23.328272739113228
LZTS2	3.2622457517976	11.291550721693753	16.798728781648844	2.0342864865599556e-25	9.498457250205148e-23	47.53629982091401	Up	22.02234692756711
SMDT1	2.210302059341726	11.949939179474594	16.64894032318107	3.276112222508957e-25	1.4696896380153418e-22	47.0652826702072	Up	21.832774367788097
GOT2	3.013833314732413	11.881001276372391	16.449437418229753	6.205886610195845e-25	2.730470764512899e-22	46.433609399755376	Up	21.563762469148102
RANBP1	2.9965342658529845	11.431779392637898	16.409875868513353	7.048045744687917e-25	3.042495067787073e-22	46.307758273182074	Up	21.51677011713556
AGPAT1	2.727467856915757	10.90082098967894	16.339609690823604	8.83951740572841e-25	3.700117832548253e-22	46.083748119116756	Up	21.43178444533553
CHTOP	2.8066053764930636	11.200535332884554	16.33767445545665	8.894902783782241e-25	3.700117832548253e-22	46.07756978765968	Up	21.43178444533553
LOC101927377	3.353133064787361	6.878633041754596	16.29863462330474	1.0090346581739104e-24	4.122447132921589e-22	45.95283287022858	Up	21.384844905126172
CYP1B1	4.750061810536432	10.419057014335117	16.10557824182723	1.8875900800949286e-24	7.319690413981673e-22	45.33317558834974	Up	21.135507287021213
PRKCQ-AS1	4.399050328054793	9.425335528589308	16.01794983069268	2.5120095812232836e-24	9.421683148984839e-22	45.05035996004244	Up	21.02587150516691
ARHGEF12	2.345179828368611	11.90687352347141	15.803948131261883	5.0681089112673945e-24	1.7838963658597955e-21	44.35558586483547	Up	20.748630379243835
FTCD	1.573252743704531	8.151166003117527	15.687062384990003	7.453737024799651e-24	2.5838492331877457e-21	43.973642415914725	Up	20.587732830887816
HIF3A	4.888928585393237	11.466048719769502	15.679091535917522	7.652884254978141e-24	2.6132886398454467e-21	43.947532738900414	Up	20.582812619446376
ACSS1	1.4982856735335588	8.251698002278204	15.538706516013214	1.2191757286276596e-23	3.9847887850388895e-21	43.486346741082045	Up	20.39959469357104
NDUFB11	2.282352559022131	11.398313344295422	15.230287785905864	3.420793198815626e-23	1.043524367942703e-20	42.46424163919178	Up	19.9814974050178
IPW	3.766000196851872	11.554497573223609	15.204854725325088	3.726541692876064e-23	1.1218361498856772e-20	42.37940784890277	Up	19.950070569458507
ZNF503	2.010794019719677	11.792510181229371	15.085857910736522	5.568392890457373e-23	1.6333238582150538e-20	41.981372213519464	Up	19.786927694081058
AP1S2	2.563169037677465	10.820872094755307	15.04519156602488	6.390215873987146e-23	1.8506550503917964e-20	41.84492516635256	Up	19.732674523263448
ASB13	3.076190520706948	11.24736568560312	14.692506338309263	2.127271794904991e-22	5.531508414972654e-20	40.65254137144267	Up	19.257156422588583
NOTCH1	2.4794529545828574	8.37871002228136	14.579910668891833	3.133383403425682e-22	7.877876800766613e-20	40.26845231825702	Up	19.1035908152463
WDR26	3.455102853624785	11.438483395549298	14.424307822689288	5.365370374111406e-22	1.3199388041859663e-19	39.73492638258723	Up	18.879446203355084
SLC4A2	4.4068503607937	11.269643863352018	14.339634287872414	7.199001119626454e-22	1.733746806483512e-19	39.443268157988854	Up	18.761014325877053
UBE2D1	2.623096825970487	11.303927593764982	14.233668437538888	1.04138153207787e-21	2.4066432396373317e-19	39.07694429423697	Up	18.61858828468981
TTLL12	1.8713303506186527	8.91857784083685	14.110070869983218	1.604773432337115e-21	3.5995697410236137e-19	38.64780657903347	Up	18.44374940764007
LZTS3	2.51681555410498	11.354917512608573	14.06651578460858	1.8698078890563192e-21	4.0742223517828116e-19	38.49610317806766	Up	18.38995527295068
CLK2	2.4064683018093067	11.517922648662177	13.967845169652128	2.64589817056469e-21	5.657523761154162e-19	38.15151011557807	Up	18.24737361336679
TNNT3	2.1516015100987538	9.582688949640728	13.899616730325024	3.3662624672491894e-21	6.938443152089568e-19	37.91248470543772	Up	18.158737965612303
MECOM	4.938303115171665	9.796543707984911	13.893929030237985	3.43460896823506e-21	7.016108802165174e-19	37.89253133709484	Up	18.15390368477691
BBOX1	3.783532564570102	9.459235591599588	13.802370043814024	4.7494923130001886e-21	9.531897774485204e-19	37.57074344716677	Up	18.020820623922628
SMAP1	2.962413154726681	11.12691756263818	13.7988003517324	4.809998687624007e-21	9.5693878238391e-19	37.558175336411146	Up	18.01911584417012
NADSYN1	2.479055002520103	8.240840534124278	13.77277234155137	5.275367946936166e-21	1.0228401971012927e-18	37.46648583162786	Up	17.990192212757314
SUSD2	2.5557122786086337	8.6415428689686	13.624042892733373	8.956949873681368e-21	1.6660654972354145e-18	36.94084867023371	Up	17.77830792938254
ATF4	1.8516189247265624	11.872306141946636	13.55466291760185	1.147702421792147e-20	2.100662696654603e-18	36.69465545254485	Up	17.67764367664777
FBLIM1	3.2221049494156144	11.253514952261222	13.42602032594812	1.8204341691885016e-20	3.179367431821658e-18	36.23650277271333	Up	17.49765927881958
INTS5	1.886755504641111	9.256083074915402	13.410707918824674	1.9234615401988762e-20	3.333854286228037e-18	36.18182441690479	Up	17.47705338593274
CLUH	2.41824644334846	11.46415602550271	13.328841542484524	2.583028551775846e-20	4.3775637211910795e-18	35.88897188650592	Up	17.35876752347176
ACVRL1	1.542577449489877	7.626408377067381	13.116255343941065	5.576578407625242e-20	9.113324099146992e-18	35.12442633010934	Up	17.040323184541794
PUM2	2.2478579385827295	11.08222596393694	13.03769992014374	7.421810658951314e-20	1.1874378046583711e-17	34.84042184226699	Up	16.925389128482927
DUXAP10	4.93721492736363	9.128207181255323	12.8551856149139	1.446288572384365e-19	2.205975749838792e-17	34.177483873556824	Up	16.65639926604319
VPS52	2.2009249120590386	11.630024590499827	12.806458306617785	1.7295013205885606e-19	2.6032408364306356e-17	33.99976627003782	Up	16.584485651677735
PYCR1	1.8171167663500112	8.493858542670981	12.73036627928734	2.2880425668806626e-19	3.3507560975653384e-17	33.72163308614915	Up	16.474857183426018
KLHL14	4.411612308331333	9.173719361131957	12.689843283009743	2.6565735459679973e-19	3.822625544540994e-17	33.573209018594646	Up	16.41763824236926
DPH5	2.633803127711607	11.523443642626392	12.673775464137112	2.8187954812641026e-19	4.030701363490088e-17	33.514298913467805	Up	16.394619377732052
OSER1-AS1	3.53316193922985	9.057613649686994	12.484329947051938	5.683703857853727e-19	7.703005792884603e-17	32.81723878723588	Up	16.11333977553658
MOAP1	1.888938308580178	11.162029808880275	12.422784756737762	7.144913922842734e-19	9.244842599550036e-17	32.58980147316507	Up	16.03410047863448
RRP12	3.836376529483582	9.885135604558302	12.417321189092986	7.291685690001555e-19	9.372273983232896e-17	32.56958791023168	Up	16.028155023994522
VPS37D	2.903826014945251	9.602566496397046	12.379147662505275	8.405705312142222e-19	1.0625090156712811e-16	32.428251888724745	Up	15.973667376157955
APPL1	3.0368554904641147	10.582459654699912	12.291948425980651	1.1639002626231404e-18	1.4551297327079143e-16	32.10470984255406	Up	15.837098285243373
MINOS1-NBL1	1.7989255455098068	11.412422918528904	12.283871754929264	1.1995767509265074e-18	1.49158241763302e-16	32.07469388400421	Up	15.826352744625535
MCM10	3.0082760030741422	8.304315858863008	12.205644682515883	1.6077162436997844e-18	1.977577416107923e-16	31.78354877514839	Up	15.703866506196716
LOC255654	1.886172158419483	8.064998234624849	12.15161457120952	1.968988686699734e-18	2.3835181038626036e-16	31.58201251353919	Up	15.622781545067852
SOX17	4.507057569162077	9.45971676889442	12.12879683832324	2.1452019003254214e-18	2.5430090299246283e-16	31.496791303390893	Up	15.594652097693157
ARHGEF2	2.397768376479803	11.379373427807812	12.064310875266347	2.734142646988421e-18	3.2244561660024793e-16	31.25559461142444	Up	15.49154352258542
SPTAN1	4.97384438514571	11.49393739013492	11.962084677479346	4.0205458124180744e-18	4.576421275736971e-16	30.87218283289866	Up	15.339474004034368
LOC283045	1.5910491310818573	8.0911502833303	11.922895818826966	4.662617466925336e-18	5.280991337910138e-16	30.72485876142728	Up	15.277284544857824
LOC101060391	4.369572521712812	8.415889129208708	11.863507748716277	5.8384062549613836e-18	6.452990179094759e-16	30.501240164377137	Up	15.19023899585184
RTBDN	4.025407281014249	9.849775414064556	11.834434364905231	6.5188880187446345e-18	7.170463412541276e-16	30.391610711668115	Up	15.144452775851594
DDX20	3.050597217121405	10.552919331450596	11.829591935965992	6.6397623365500216e-18	7.233862976091807e-16	30.373340948452913	Up	15.140629721907109
TIGD4	2.45628043857557	7.064553452939564	11.77187280148976	8.267088350505184e-18	8.921826149585288e-16	30.15535574233246	Up	15.049546243660128
LOC101927313	1.2386588920477966	5.94707074546858	11.758199355583455	8.708244495722618e-18	9.310089991478402e-16	30.103656655122556	Up	15.031046121100978
MAGEF1	4.205999631825507	10.108483120997828	11.738911220980276	9.371225210542714e-18	9.972291236837522e-16	30.030690055333395	Up	15.001205046583777
MLX	2.643036377292922	11.44253934856295	11.597239859166166	1.6085776102798545e-17	1.6881948231923302e-15	29.493378115457503	Up	14.772577435817581
TPH2	2.270364681035733	5.525731814542137	11.57330759580102	1.7627167974029502e-17	1.8248505704878777e-15	29.402373965297087	Up	14.738772692341493
RP4-612B18.3	3.671023820655887	10.04957609718105	11.457459823539194	2.7476862964144133e-17	2.757206788406376e-15	28.96089478694853	Up	14.559530660917805
ZNF302	4.150181930564582	11.013750305344992	11.437787576681066	2.9632755631651796e-17	2.9476861569415716e-15	28.885769571616336	Up	14.530518758114281
LOC644794	3.4860119808839256	10.73984272222004	11.3763116340804	3.753305198208683e-17	3.654122111907084e-15	28.650710742584764	Up	14.437216943671686
STS	2.9240895127335627	8.681900868698653	11.302311603745045	4.9913575147553934e-17	4.738475874692475e-15	28.3671818720739	Up	14.324361326185018
CAPSL	4.1285201940700755	9.882443845210773	11.300541093725643	5.025556599422731e-17	4.7512276627352325e-15	28.360390456876253	Up	14.323194159161769
NOG	2.0924853269139287	6.561392337948113	11.238883870320008	6.376077043700504e-17	5.906002699709467e-15	28.123657509263552	Up	14.228706358849326
KIF5A	1.938790134272434	8.727382257732707	11.233576787670504	6.508183784938873e-17	6.004061968371632e-15	28.10326058065023	Up	14.221554834019878
RPS10P7	2.9404469644673004	8.15734978390386	11.227007364047612	6.67554048472638e-17	6.133722520082524e-15	28.07800758462765	Up	14.212275874705465
BCAP29	4.261479824788719	8.973226320480652	11.165039842324855	8.484036089522619e-17	7.672184256608222e-15	27.839561167738715	Up	14.115080975614857
CLDN3	3.651900645258371	9.757745102606586	11.161608409273184	8.59752480232529e-17	7.744203541433083e-15	27.8263445209899	Up	14.111023240957985
CALML4	2.470732717133326	9.206440906886522	11.147559301012503	9.078352525019388e-17	8.145240290977199e-15	27.772218505378092	Up	14.089096099138636
GATAD2B	3.5667375020837726	10.43789022346283	11.139976501906425	9.349038775286073e-17	8.35040093553899e-15	27.742995512696822	Up	14.078292671832335
VWA3A	2.8221919549225607	8.84421765722468	11.12411562583355	9.941819842240707e-17	8.816236285683145e-15	27.681849043019092	Up	14.05471677872446
GRHL2	2.0806633046007006	8.008612279176267	11.078872759818374	1.1849272566630718e-16	1.0386954293177938e-14	27.507274307195622	Up	13.983511779447264
ELFN2	1.3056021550726022	6.854428130162984	11.063439906721552	1.2581023998817278e-16	1.0986307178203836e-14	27.447672403722382	Up	13.959148262229474
SPG21	2.9767753982092273	10.72811784661135	11.027430374495175	1.4470500110160794e-16	1.2540551970468515e-14	27.30849971913431	Up	13.901683347679704
LOC647070	4.112061639690821	10.323520006434167	10.964007813159716	1.852097958424267e-16	1.5752471818137104e-14	27.06302902536447	Up	13.802651288684014
ELF3	2.704068695665878	8.949350631589235	10.961877680781084	1.8675279395139616e-16	1.5824878417829602e-14	27.054776854759496	Up	13.800659617972126
CCDC36	1.3947743152798653	7.64794511830398	10.95474805294888	1.920120900997511e-16	1.6150899299236053e-14	27.02715292060438	Up	13.79180329068135
POR	2.1492247332708656	8.65519257271269	10.915422332876942	2.2382112630011313e-16	1.8486655410181545e-14	26.8746841848681	Up	13.733141653918725
LYPD6B	2.3220556715353924	8.964783371988027	10.888605178045466	2.4850819239350166e-16	2.0451866668240737e-14	26.770615200870687	Up	13.689267047230269
ACSM5	3.3918340066558805	8.948482139218218	10.863521310195411	2.7407807049625313e-16	2.231541699246895e-14	26.67320180521586	Up	13.651394993392744
VAMP4	2.3099355701413007	11.15336826238638	10.850940963667176	2.878839217670964e-16	2.3356369667054605e-14	26.6243202718291	Up	13.631594659679893
MYLK-AS1	3.3996638212227497	9.16134439558177	10.819640399406738	3.253513184167005e-16	2.60269678813136e-14	26.50262635297275	Up	13.58457642386602
WFDC2	3.2865263191747864	11.227583033390014	10.730859551140451	4.605898835758226e-16	3.596531039703497e-14	26.15688333410463	Up	13.44411618718753
C5orf24	1.7171152584020604	11.747963660826064	10.704467858480871	5.108119420415391e-16	3.9591023349884535e-14	26.053943761851983	Up	13.402403272446735
LOC102723390	2.278438433760949	4.658220312338566	10.703769162254666	5.122139477934272e-16	3.9591023349884535e-14	26.05121753244606	Up	13.402403272446735
PANK1	1.7763979582286638	8.391423552575352	10.700121115542087	5.195973035196105e-16	4.002648722971437e-14	26.03698245512868	Up	13.397652522402826
MMP24	3.124931347748695	8.664377768513441	10.687769915981598	5.454001161387584e-16	4.173314132822292e-14	25.98877634351857	Up	13.37951892393515
NEK4	3.1265619887468468	8.621060208771588	10.64503992477412	6.450414739558458e-16	4.886723139945628e-14	25.82188016813933	Up	13.310982265473548
AQP7	1.482476726630881	8.144313904845447	10.637890561107625	6.634197936072728e-16	5.0093668178022424e-14	25.79393736708404	Up	13.300217165332946
NEK2	3.291212672247574	8.482049920724986	10.602749139625756	7.617158459826675e-16	5.732663434288635e-14	25.65651248824806	Up	13.24164355498478
TUBA4B	1.6859386505583638	7.908741638203628	10.591016638539992	7.976987150289785e-16	5.96423166704183e-14	25.61060269018175	Up	13.224445495708
CNOT11	2.132459051696305	9.177547320736313	10.579440164036953	8.348804721973032e-16	6.221899128144007e-14	25.565289551459173	Up	13.206077034121812
TMEM139	2.439312391011403	8.739619647666299	10.554562470444154	9.207957555464898e-16	6.817762489044706e-14	25.4678657101569	Up	13.166358132396358
BAHCC1	1.648041089562068	7.487672382395257	10.552894946282084	9.268632122674746e-16	6.840549494666951e-14	25.461333234994683	Up	13.164909010426598
FOXF2	3.433388788987049	8.403972706309268	10.535226435198307	9.936779876626384e-16	7.286653422991509e-14	25.3920999661239	Up	13.137471886446363
SAPCD2	1.6503746033743427	8.06577698671961	10.524393015472018	1.0370222226098826e-15	7.580201735173005e-14	25.34963399093506	Up	13.12031923614808
CD24	3.2348228812432502	11.927914259014653	10.433528296981669	1.4842818133354325e-15	1.074648215420929e-13	24.992986952278592	Up	12.968733678171287
LOC283177	3.168026515203273	11.026966328651945	10.398420740592632	1.7052285540736601e-15	1.219185127770352e-13	24.854967871468908	Up	12.913930343713353
IKBKE	3.2007357811018338	10.9147641016506	10.391736851309584	1.7509041007883353e-15	1.2479418978796366e-13	24.828677553899453	Up	12.903805634219031
RP11-245P10.8	2.961850751704917	8.308892732464196	10.390456659630566	1.7597920269811873e-15	1.250381421903807e-13	24.823641563600862	Up	12.902957487663693
GPR137	1.6004550555000092	8.3288044599834965	10.386285387076882	1.7890679514384343e-15	1.267247234085447e-13	24.80723158325923	Up	12.89713864800177
AFTPH	2.235058502377056	10.927444386395274	10.372309641972173	1.8907762114546057e-15	1.3310482751344594e-13	24.752237893621945	Up	12.875806193026971
SGSM1	2.5934132406333257	8.707381985932658	10.333426357134222	2.20543478412835e-15	1.5430624595129213e-13	24.59913408159692	Up	12.811616494369254
DLX6-AS1	4.172510376330237	7.841152461109706	10.321172228515046	2.3151378435034303e-15	1.6099707818089661e-13	24.550852694380502	Up	12.793182005591927
STIL	1.686812912452611	8.83990874828473	10.296685077469332	2.551085595990328e-15	1.7686753742625064e-13	24.45432959188655	Up	12.752351870936423
C9orf85	3.3560619490904164	10.326652331336469	10.280811460858954	2.7168202858425115e-15	1.8778891637399042e-13	24.391728366258853	Up	12.726330044123502
SPRR4	3.0932847799480294	10.483434722035565	10.273459574485214	2.797210700321798e-15	1.921843351731604e-13	24.36272634286416	Up	12.716282014300715
PSRC1	1.7430602390165406	7.979911233764531	10.254504261048815	3.01569843990662e-15	2.065753431336035e-13	24.28792683115475	Up	12.684921517182643
LOC339666	3.1535762218631085	8.208539180081665	10.250779080880276	3.060615081309568e-15	2.0902630580681073e-13	24.273222883561733	Up	12.679799054808422
YEATS2	3.3195000821568854	11.360123369532742	10.203830702061506	3.687906206955607e-15	2.4743579504087194e-13	24.087796678567244	Up	12.60653747340442
NCOA3	1.4530121593260574	9.746380043358656	10.195642384399417	3.809882293072625e-15	2.548722134011947e-13	24.055435033610156	Up	12.593677509467263
HTR6	1.384346869628561	7.418329552717703	10.17486976881731	4.137844457975921e-15	2.760050826648137e-13	23.973309937241048	Up	12.55908292027914
HCN3	3.5863673320276597	9.604570906738791	10.163175823546712	4.334817989813372e-15	2.86636707482486e-13	23.92705992057597	Up	12.542668193435304
NES	2.322155006048294	8.451733509351127	10.129635831616303	4.9536948942845175e-15	3.266155201335317e-13	23.794337675979953	Up	12.485963182280901
AC104667.3	3.785273844751476	9.13192273838123	10.124722224225234	5.0515426599248755e-15	3.321098980356932e-13	23.77488516560587	Up	12.478718180715301
TBR1	1.6672985133570766	5.3653092688571915	10.122503404415683	5.096362373032157e-15	3.3409648920516533e-13	23.76610033983287	Up	12.4761280880459
BACE1	2.9277198525466055	11.257776485370233	10.093250193692455	5.726074471104407e-15	3.7323891118062033e-13	23.65023793493028	Up	12.42801308617388
IDO1	2.241168367044815	9.010425529111512	10.082944096440327	5.966103752619706e-15	3.8777979476189283e-13	23.60940028003484	Up	12.411414823550306
RNF32	2.6474970396350423	6.8293838292018885	10.07764365509058	6.0934664895598076e-15	3.949360334692319e-13	23.588393660925615	Up	12.403473239970912
FOXM1	3.2340683043919034	8.2048307140465635	10.062166063613878	6.4812446209330516e-15	4.1536245289167313e-13	23.5270385934812	Up	12.381572764514827
TRPT1	1.6788607972998442	9.08123874619619	10.031411315672829	7.327028873566723e-15	4.669501214438246e-13	23.405059057019432	Up	12.330729507311004
NUB1	1.7102971092969987	11.552952126053787	10.027711046140562	7.436003515137278e-15	4.725786789522938e-13	23.390377336435822	Up	12.325525876064303
PLA2G2E	2.981467787567711	8.466062610083478	10.021426369151262	7.624839006103904e-15	4.832373729103912e-13	23.365438553680303	Up	12.315839485353184
OR51B2	3.323234594173347	9.794702643465495	10.015479183204848	7.807973950411679e-15	4.930574565696341e-13	23.341835762963917	Up	12.307102468923217
CHST14	1.8484131975903024	9.047538323296656	9.993250046579016	8.532540214388641e-15	5.319236718392307e-13	23.253586502587694	Up	12.274150682135902
UBQLN4	2.9204652916323735	10.02331752640275	9.985741457582872	8.792266401651102e-15	5.466257146830859e-13	23.223767683982647	Up	12.262309941830544
MAP3K12	3.4082846130728672	11.2032571934111	9.982804413724985	8.896010632466157e-15	5.515767676428e-13	23.21210246776124	Up	12.258394034550246
SLC6A12	2.6394991778078536	8.104387307800973	9.97738637253713	9.090631535107304e-15	5.621204294370812e-13	23.190581351552925	Up	12.250170630628492
SMIM22	3.004717244380416	8.055646730720568	9.971715057184648	9.298939209792024e-15	5.734512942879563e-13	23.16805144127329	Up	12.241503462715189
IQGAP1	1.5783741625786352	11.621705434390073	9.950965944313507	1.0102816112097302e-14	6.163795462097978e-13	23.08559939780971	Up	12.210151781237853
AK097453	3.1708340991943915	8.712044040072316	9.916741096256285	1.1584425550857592e-14	6.993141746123243e-13	22.949516298531	Up	12.155327668823215
LRRC75A-AS1	1.5719831081046998	9.75319194665092	9.906160468297257	1.2085290719818472e-14	7.238203308343635e-13	22.90742571233014	Up	12.140369222491744
CP	4.32240774460639	9.934011956007977	9.87411414573476	1.3739154062819803e-14	8.122431674502694e-13	22.779884512825937	Up	12.090313933231519
LINC00629	2.1431145112489607	5.262050112722972	9.855285091910476	1.4815178001183614e-14	8.691191217668715e-13	22.704906105086373	Up	12.060920694920114
ZNF628	2.30413232809234	7.06969147387377	9.84577213111168	1.5390637423853434e-14	8.982714122967926e-13	22.66701357672194	Up	12.046592421625114
ARHGEF15	3.3901106314655705	9.650963660832057	9.824559706840049	1.675607150342587e-14	9.718625726216624e-13	22.58249184099325	Up	12.012395142657795
RALYL	3.43466231643061	8.495665633638524	9.824219203349749	1.6778955207201222e-14	9.718625726216624e-13	22.581134785409315	Up	12.012395142657795
SLC39A1	2.5957876769593993	9.059652913183175	9.82289728696633	1.6868093408193218e-14	9.745583562779106e-13	22.57586627808863	Up	12.011192150337354
PAK1IP1	1.7119872813536947	8.59382054750011	9.811993072207173	1.7621774629424096e-14	1.015537989286131e-12	22.53240191501507	Up	11.993303825849775
SIM1	2.4262649715436755	7.392947626325904	9.79718736502249	1.8699615015883176e-14	1.069571229870978e-12	22.473370390344233	Up	11.970790287567615
ARHGAP11B	2.3149578739103687	7.116922027939387	9.79285828272342	1.9027116355667687e-14	1.0855895139683816e-12	22.45610658148153	Up	11.964334360307479
ESM1	3.761009369896416	6.78962716326178	9.78322586913034	1.977666275026021e-14	1.122755005119611e-12	22.4176882621874	Up	11.949715000223401
ARMC3	3.071933814431005	7.563949914148603	9.772106576186172	2.0678903238813145e-14	1.1681793264217433e-12	22.373330161467475	Up	11.932490483852535
GNAQ	1.9220757399832884	11.55525231227054	9.742747020470835	2.326515931449708e-14	1.3078220637748862e-12	22.256157975469566	Up	11.883451340092344
SEC24B-AS1	1.5003620498431482	6.584323562960541	9.736571961443348	2.3849219985067793e-14	1.3373683922508972e-12	22.2315048185118	Up	11.87374894525548
RP11-38C18.3	3.186860313114111	8.630088449750579	9.715221378796189	2.5984613676739183e-14	1.450004820268575e-12	22.14624167373033	Up	11.838630554032223
OVOL2	1.85281861172868	8.239669977612689	9.707963244635808	2.6753491513312633e-14	1.485662942556019e-12	22.117248155955753	Up	11.82807970927791
GHRHR	2.944487879919251	8.454496010041101	9.687000856629274	2.9104951394550286e-14	1.608435224531198e-12	22.03348781419767	Up	11.793596424469888
RBM4	1.723128998725021	9.423641691510529	9.654037834423477	3.322998284872551e-14	1.82756917691344e-12	21.9017060414911	Up	11.7381261752001
KLF12	2.52108794887644	10.415200924278365	9.615794653533538	3.87580650413372e-14	2.106284489502978e-12	21.748709089216103	Up	11.676482970340935
SYT7	2.6501687296439895	8.40072583293574	9.612778358648772	3.9231543469234845e-14	2.126963229935128e-12	21.73663721440145	Up	11.672240017936625
GLP1R	2.582430543812987	10.119828612962554	9.606023560282193	4.031306079081832e-14	2.175288957153614e-12	21.709600507692	Up	11.662483044841768
RPP25L	1.961835653152061	11.73956729236733	9.599724168663426	4.1348648981665174e-14	2.225919388356512e-12	21.68438347690699	Up	11.652490567685886
RAB11B	1.7213555018395397	8.160913930182648	9.579872048709998	4.479041284165874e-14	2.405539566676785e-12	21.604893981200497	Up	11.618787495361676
KIF14	2.886286650571444	7.458148988965477	9.557302164265275	4.905450684291415e-14	2.6222384627547497e-12	21.51448631564926	Up	11.581327816707931
AOC4P	1.2981000339127569	6.153922574743871	9.550350052497516	5.0448416854774914e-14	2.6904646368773786e-12	21.48663073850745	Up	11.570172711891024
CUBN	3.464187273219453	8.938692613179896	9.521227824942068	5.673347398474024e-14	3.0116128800391467e-12	21.369905530623008	Up	11.521200854140629
CHAD	0.9815224632273702	7.819231813744868	9.500315190910069	6.172684629488102e-14	3.254028839586596e-12	21.28604694137325	Up	11.487578602346359
NDOR1	2.2522235643342556	9.167544343415566	9.467174034589108	7.05602941640784e-14	3.6367962132556346e-12	21.153087794383953	Up	11.439281033819675
AFF2	2.418019634381184	8.813646713561516	9.451397994976864	7.52009983879559e-14	3.866345263186614e-12	21.089768234072675	Up	11.412699366240862
PAK3	3.532934571662172	10.02626204539488	9.446942669687598	7.656626622294047e-14	3.927712118642723e-12	21.07188290630102	Up	11.405860351299205
C1orf106	2.735943521962569	9.074395581152787	9.443916607133051	7.750773071748845e-14	3.967112686991987e-12	21.059734369890684	Up	11.401525463089316
SUV39H1	1.1208880637029155	7.928922597255004	9.436636621073603	7.982059194728805e-14	4.059375632999575e-12	21.030505241596032	Up	11.391540759525073
PRR29	1.3051856696906636	7.741486425064214	9.436568345185847	7.98426082805109e-14	4.059375632999575e-12	21.030231096418692	Up	11.391540759525073
FXYD3	3.0835052296331673	10.450985505932362	9.424364652280838	8.387745450050105e-14	4.255060491168433e-12	20.981224897054787	Up	11.371094261479765
FRMPD3	2.9767144511038497	8.347346360796408	9.40544063861612	9.054313950006045e-14	4.567329086660411e-12	20.905211475448446	Up	11.340337695340299
MUSTN1	1.9503454610469388	8.327348332470244	9.40331733700228	9.132349139561423e-14	4.581995964123372e-12	20.89668111199649	Up	11.338945297678206
TIMELESS	2.365416847889083	9.01135282871255	9.396769873942812	9.377259684655745e-14	4.694580400989907e-12	20.87037472474881	Up	11.328403218664802
CYYR1	3.176775813462642	8.055351187673168	9.382717792774969	9.925390274138575e-14	4.958144193930489e-12	20.813906357372908	Up	11.304680847128964
PTH2	1.5609059960468403	7.759643840610779	9.380533812703302	1.0013424547788008e-13	4.980372613670475e-12	20.805128808912144	Up	11.302738163664525
MIR22	2.016859894898319	11.473500949000035	9.370746528069992	1.0417674889180154e-13	5.170194876129128e-12	20.7657891313898	Up	11.286493087073852
PPM1F	2.709174058583063	10.549066498693366	9.354143164162986	1.1141304482362189e-13	5.517357256536029e-12	20.69903761069263	Up	11.258268893961622
CALHM1	1.5594180211419664	6.907545019877034	9.331761227609514	1.2197347399004978e-13	6.001046923603148e-12	20.609024874705757	Up	11.221772977369508
LINC01144	2.26396500093108	8.5679625530221	9.331396755532165	1.221535150180696e-13	6.001046923603148e-12	20.60755881272276	Up	11.221772977369508
KIAA1107	2.4839971653152872	8.11584130363572	9.310180919688577	1.33106943461359e-13	6.4932915979795994e-12	20.522204567368743	Up	11.187535093577283
RANBP17	1.181316439717187	7.56186109419736	9.288114765052434	1.4554749153014545e-13	7.055044615928384e-12	20.43339811005648	Up	11.151500235433343
GSK3A	1.9693586015056113	9.892183564017456	9.232949878379047	1.8200259206116643e-13	8.711375112484154e-12	20.211247237942857	Up	11.059913285104125
FOLR1	3.540747325695558	9.831685042232174	9.21853783766961	1.929536433632361e-13	9.197055013557249e-12	20.15317787884902	Up	11.036351215710123
MALL	2.471962534735723	9.357981373619094	9.214654671292251	1.9601582775545458e-13	9.323588613756847e-12	20.137529523630135	Up	11.030416897176005
DQ586822	2.343589332571782	9.263609032777412	9.182325586045597	2.23480008798846e-13	1.0498971501660775e-11	20.007214108260733	Up	10.978853243123492
LOC101928747	3.5777245835711913	11.247550810673882	9.181058387971849	2.2463191092300825e-13	1.0531462069687511e-11	20.00210486040305	Up	10.977511332070026
RNF40	1.7202498357474898	9.117587421367176	9.175837685378989	2.294408175544499e-13	1.073492119596781e-11	19.981054356590203	Up	10.969201139330382
C11orf63	3.0586495288437003	7.769158808929007	9.16604823070035	2.387384872156934e-13	1.1124435537694196e-11	19.941577677304487	Up	10.953722016219743
SOD3	3.2591203432143887	10.430026495393102	9.160755966648294	2.4392145973083844e-13	1.1342843652808643e-11	19.920233855231096	Up	10.945278054093455
SUSD4	2.695775461776666	10.864390077437788	9.150162730043418	2.546377935002422e-13	1.1817156343797242e-11	19.877506086287458	Up	10.927487018613595
GADD45B	1.7453997398088408	9.600525007565023	9.1443401566643	2.607280344119089e-13	1.2053199832920924e-11	19.854017936941514	Up	10.918897643105511
PSAT1	2.9922254814317935	10.250333540747878	9.144259661221904	2.6081324710702197e-13	1.2053199832920924e-11	19.85369320586758	Up	10.918897643105511
SH3BP5L	2.6100937822074597	8.536448801373519	9.143796057376758	2.6130456388516893e-13	1.2053199832920924e-11	19.85182294877579	Up	10.918897643105511
TYK2	1.5855298811482097	9.635108315781526	9.128180239572067	2.784079784780441e-13	1.2790554497187092e-11	19.788818712055463	Up	10.893110627542566
DNTTIP2	1.9747901558942953	11.363757573449249	9.059911021575768	3.673971027522453e-13	1.6579247167393727e-11	19.51321233350212	Up	10.780435193838201
ESPN	1.4187207757800468	7.586590908489569	9.050993792276694	3.809591917130589e-13	1.7123704022009968e-11	19.477193692000693	Up	10.766402287420227
RP11-805I24.3	1.3072371984388331	6.77648450705865	9.042285417342072	3.9468850759604733e-13	1.7602491940136387e-11	19.44201444341256	Up	10.754425845865272
DLGAP5	2.9807683605457784	8.3040664479012	9.036507471488768	4.0407079053573666e-13	1.7985866958496338e-11	19.4186709732627	Up	10.745068623388066
ZNF474	2.282453221426401	8.066093429485033	9.011812859889911	4.467598416805993e-13	1.9770635237544353e-11	19.318881982213743	Up	10.703979376425929
EHF	3.2924464862135148	10.347725728076764	9.006743756139869	4.560677155144697e-13	2.014357772829257e-11	19.29839409402418	Up	10.695863391296706
TMEM212	3.140980750816309	8.677353618679003	8.998668253100247	4.712995879956262e-13	2.0776229814550927e-11	19.26575237646628	Up	10.682433259439625
LOC102723661	0.9378862854344732	7.195065035469422	8.967497183382191	5.350387580375126e-13	2.3450482270383617e-11	19.13972485048324	Up	10.629848221383325
BTBD11	2.2704900575811138	7.63636834868619	8.967006397554053	5.361086269897762e-13	2.3452446036135928e-11	19.137740155938545	Up	10.629811854671852
CLPB	3.771858318695636	10.006354217866228	8.956793009226551	5.588665988129667e-13	2.4401352889774552e-11	19.096435321700795	Up	10.612586094305717
ATG9A	1.1804455461072374	8.664094875750317	8.940903232893717	5.96215681343125e-13	2.5933115158648963e-11	19.03216360537884	Up	10.586145311423808
PAX8	2.26500651990673	10.870384047905516	8.937443276100636	6.046748066812591e-13	2.625114782174673e-11	19.018166926167975	Up	10.580851702476979
AC007292.3	1.453706684675517	7.569373098917766	8.91161356987431	6.717496361571527e-13	2.8780823830785575e-11	18.913658389269713	Up	10.540896778848216
LOC100996583	1.5611719581063683	6.00601101254466	8.909160510631187	6.784956204418509e-13	2.9015516448764682e-11	18.90373146097874	Up	10.537369694999413
PNPLA3	2.874967612690595	9.010785127723558	8.90831441476857	6.808381393064151e-13	2.9061372741028865e-11	18.900307450886277	Up	10.536683875248826
SORD	2.0038152157823657	9.131294301003228	8.905775274235578	6.879168847016721e-13	2.9308846191973104e-11	18.89003176006687	Up	10.53300127819488
PLCB1	3.590496025400232	8.996191820998568	8.897428164230963	7.117119243092056e-13	3.0098441989409087e-11	18.856249499862987	Up	10.521455984569435
KIF20A	2.547794684944894	8.852405613668349	8.869428670074532	7.977278388982422e-13	3.355002798925162e-11	18.742906165412975	Up	10.474307113182844
CENPO	2.1048779819490484	8.297939789395807	8.865452083863074	8.107623187577008e-13	3.403565337772007e-11	18.726805747552316	Up	10.46806590788839
ATP5SL	2.0383626053001773	10.354538011757109	8.851566445427004	8.579754188656593e-13	3.595168426415278e-11	18.670579754969285	Up	10.444280758980863
CTD-2619J13.13	0.9245707908624724	7.29144520013461	8.829778273303694	9.376797142499655e-13	3.914812806993606e-11	18.58233684441012	Up	10.407288999591572
MIP	2.2993163360514153	7.811881140110208	8.826560235196359	9.500654093911584e-13	3.959298087697689e-11	18.56930184864647	Up	10.402381799846989
NUF2	1.6413486275386775	9.157764295805787	8.807046576372079	1.0287648766379678e-12	4.271708096660629e-11	18.490249873405318	Up	10.369398432089254
SCGB2A1	4.565013372284842	9.395989499060066	8.780845341058123	1.144819047583244e-12	4.727854691273834e-11	18.38407956349757	Up	10.325335879789177
ZHX2	2.073726022104035	11.29052392366554	8.77276674268485	1.1831850303189417e-12	4.8687212785372425e-11	18.351338241813213	Up	10.312585086957087
GOLGA7B	2.008756684095613	9.044473149621773	8.763821746514164	1.2271719317673025e-12	5.0316248435312023e-11	18.31508232596048	Up	10.29829174722456
KLRG2	1.5580895670942363	7.60897403087708	8.76116879976621	1.2405304116250552e-12	5.0772979047530654e-11	18.304328740104477	Up	10.29436735410677
FILIP1	2.1430972177942547	8.828792632040967	8.747761259091188	1.310306156208508e-12	5.3437601689651434e-11	18.249977478993593	Up	10.27215304148167
LAMB4	2.18812148442039	8.658590518686127	8.727222200449468	1.4249060449806056e-12	5.749634109896169e-11	18.166702320689804	Up	10.240359791677164
BUB1	2.5180561612132557	7.260776251259603	8.703985417078174	1.566724933482611e-12	6.255689311195228e-11	18.07246895147577	Up	10.203724828647713
PLXNA3	1.905337014713716	8.438340142313269	8.687702618268856	1.6744568425884844e-12	6.651023975969087e-11	18.006423893875276	Up	10.177111486594912
PAK4	2.7807519592480823	10.885597299944491	8.68401346616643	1.6998798316355697e-12	6.740303408663811e-11	17.99145882292219	Up	10.171320553651226
MAT1A	2.4585473551003485	8.188230728671728	8.671486573442337	1.7891300198764153e-12	7.081921405666524e-11	17.940639560609863	Up	10.149848897300407
LPAR3	4.477901715938115	8.852386639115823	8.647180482934873	1.9759290931417893e-12	7.794358917584654e-11	17.84201769354498	Up	10.108219599526457
DQ592442	1.517658049718583	8.057942906714612	8.627020034065895	2.1456212283816147e-12	8.411149056538497e-11	17.76020055729515	Up	10.07514467069126
RP11-45M22.3	2.0448403892273816	8.086386604202016	8.615815015543323	2.2461743926889674e-12	8.767301351678558e-11	17.714721054961814	Up	10.057134065520279
FAM83D	2.8068838741570543	8.936504556450318	8.615463780858258	2.2494015881093205e-12	8.767301351678558e-11	17.713295375341573	Up	10.057134065520279
ADPRHL1	2.183869370378903	7.892549699254809	8.607905631819248	2.319984371513236e-12	9.027027625144783e-11	17.682615434503347	Up	10.044455228479707
GJD2	1.49336824801353	7.90548040747552	8.606391224227215	2.334391678641868e-12	9.067665062079336e-11	17.67646793612779	Up	10.042504530051607
RAC1	1.702956048284749	12.251009255583218	8.603300905443175	2.364070266833136e-12	9.167383666928019e-11	17.663923033672155	Up	10.037754592480725
LOC340017	1.800766780862697	4.16977904280077	8.58993706350741	2.4968298061841968e-12	9.600835148855167e-11	17.609669885225085	Up	10.017690987297538
DKFZp451B082	2.5760854040516223	8.586014745152834	8.558684753835939	2.83721360775442e-12	1.0873134025429376e-10	17.482772098922393	Up	9.963645258694394
CCDC116	1.291282453107118	6.303630731009911	8.557444544325747	2.8516416603496765e-12	1.0910152098183988e-10	17.47773567098376	Up	9.962169194879891
TTK	2.8118990552906027	8.096217874430154	8.54745258465452	2.970599257906251e-12	1.1327390070272854e-10	17.43715707402746	Up	9.945870143856837
ZNF254	1.5490640219380136	9.06474362755466	8.54352711059607	3.018682943950243e-12	1.1472499514059404e-10	17.421214386072442	Up	9.940341952028712
FKSG49	2.2595182241686693	11.51505471862874	8.538259073051476	3.0844400955942076e-12	1.170296931129351e-10	17.399818347348482	Up	9.931703933817847
AIF1L	2.806966780940935	9.284902157449103	8.531726089776688	3.1679843717255346e-12	1.1980217262927026e-10	17.37328358261756	Up	9.921535305883706
BSCL2	1.6791517469615762	9.494639585586777	8.517904910752955	3.3522811377069957e-12	1.2649632754609214e-10	17.31714242331257	Up	9.897922082785547
HS1BP3	1.7616448122448984	8.522152636523586	8.509576352256811	3.4684868936787388e-12	1.3030461681523132e-10	17.283309386272286	Up	9.885040196552511
TCF7	1.7461312682050796	9.165495607465314	8.506985511542979	3.50545290549936e-12	1.3147747053265548e-10	17.272784224382075	Up	9.881148659810044
TRIP13	2.2052476167356287	8.633138229081315	8.505352266709805	3.5289586150773538e-12	1.32142461791088e-10	17.26614914898988	Up	9.878957606621647
TNS4	2.5296447750918736	7.980728650065924	8.496287846278127	3.662314596183019e-12	1.3691192099031256e-10	17.22932345588968	Up	9.863558735979133
PXN	1.321113145407395	8.637475452796782	8.494855866394358	3.68383905214872e-12	1.3749193095287202e-10	17.223505590136483	Up	9.861722788709866
KIAA1161	2.9697944185347493	8.531097539414713	8.48963380513512	3.763412943886257e-12	1.4023310218757927e-10	17.202288847238165	Up	9.85314945854822
CARD14	2.8596471808772987	8.834750312851575	8.466666057987588	4.1343539769123656e-12	1.5305806575692235e-10	17.108964148759142	Up	9.815143779288306
SKA3	1.3697411924843017	7.935726602586439	8.462402552382882	4.20714061113835e-12	1.5550108245918308e-10	17.091638711020458	Up	9.808266583457634
BCORP1	1.5718592218003868	5.481138075568365	8.453912287298518	4.3559335302532666e-12	1.5996693938790448e-10	17.0571357365869	Up	9.795969764375315
OGFOD2	1.1329569744704877	8.473215298843861	8.45140852742969	4.4008107875419275e-12	1.613560096284804e-10	17.04696053002625	Up	9.792214854865694
PPIL2	2.198789994714274	8.964773648997653	8.448017591221554	4.462329258397214e-12	1.6334980976459178e-10	17.03317960764402	Up	9.78688136696287
CEP55	2.958809513528453	8.777625664673614	8.446486204925199	4.490393446660301e-12	1.6411455537722208e-10	17.02695588604879	Up	9.784852899509483
PTPRB	2.1711164655919832	7.31779686117033	8.435705493659329	4.6930297377215375e-12	1.7124693360339882e-10	16.98314021481494	Up	9.766377196367193
NCAPG	2.42967750173964	7.988653403187473	8.424552381319701	4.912313980014924e-12	1.7896310756172203e-10	16.937807962789986	Up	9.747236487644157
BCL11A	1.6404559805396186	8.607720492062063	8.414158315355825	5.12590720199782e-12	1.861517950389018e-10	16.895558163495174	Up	9.730132771577036
SLC39A4	1.852598616029364	8.984628030865583	8.413186347921918	5.146350316465404e-12	1.86598017258973e-10	16.891607178380916	Up	9.72909297526295
PITPNM1	1.3049244099308606	7.6571454026537005	8.411725133651167	5.177237433403141e-12	1.8742091018802286e-10	16.885667394311323	Up	9.727181957350748
DNA2	1.8142083715227528	7.810003679711676	8.404053889610443	5.3424651549121555e-12	1.9309677769231469e-10	16.854483238430042	Up	9.714224973461015
TMEM174	2.0694383626984054	8.840270761579346	8.394440154488619	5.557010762279495e-12	1.9990385099086884e-10	16.8154007975506	Up	9.699178839458797
BC052578	1.3394630310186768	6.550215058068456	8.392146924743605	5.609450119945347e-12	2.0115769481854167e-10	16.806077886139143	Up	9.69646334985228
HMGA1P4	1.246605789910011	7.972070932547459	8.387104192677706	5.7265127290827914e-12	2.0503424840169823e-10	16.785576714954395	Up	9.688173589434227
CUX1	2.0028244715571777	9.706883832019232	8.384873061479336	5.779084463857775e-12	2.0659323976344068e-10	16.776505895330818	Up	9.684883893762521
SCGB2B2	2.6780285592987285	9.329617534487936	8.38319524108196	5.818936910663518e-12	2.0769338155861256e-10	16.769684526983955	Up	9.682577342648196
WWC2-AS2	2.1536229049336395	7.883620363683358	8.380578207437013	5.881648372112104e-12	2.0960472446347795e-10	16.759044557686263	Up	9.678598932636334
SLC4A11	2.8626688916159235	8.785367139622133	8.377097672764625	5.966102015871096e-12	2.1198530518336959e-10	16.744893655244425	Up	9.673694243311653
GALR3	0.6977764732810048	8.013255533073446	8.3770617467742	5.966980048869707e-12	2.1198530518336959e-10	16.744747588618527	Up	9.673694243311653
ALOX12P2	1.4001217368821814	8.023794388096325	8.367123833695837	6.214901871995284e-12	2.2020278576036828e-10	16.704341309010424	Up	9.657177191119477
PLK5	1.2890084831468984	7.482105812912752	8.367020402250303	6.217535714025871e-12	2.2020278576036828e-10	16.70392075898443	Up	9.657177191119477
GTF2A1L	2.2127083382961112	5.7998931388819095	8.355411887992524	6.520360510636776e-12	2.29506658650552e-10	16.6567193732331	Up	9.639204709807586
ZNF704	1.6578394454999064	10.24160459143314	8.346673540451285	6.758021578074723e-12	2.3677913581128877e-10	16.62118655479381	Up	9.625656568846232
GMNC	2.4586460287473155	8.14512584538386	8.336191373891936	7.054585749967641e-12	2.452915917530542e-10	16.578560827518718	Up	9.610317338535713
CXXC5	1.7147816379986909	11.096290647804652	8.334672477805027	7.098626846637629e-12	2.4644838182734804e-10	16.572384059441944	Up	9.608274029064383
TBX20	2.1587040019150967	6.041226378538141	8.320402486972837	7.526077961557978e-12	2.6049793900527225e-10	16.514351338993382	Up	9.584195708380497
UGT2B28	2.452943550854785	8.051977736683012	8.28291594469858	8.775857751135524e-12	3.0147574998232684e-10	16.36188490132752	Up	9.520747615770667
BLACAT1	2.368466188719508	9.24789330708399	8.265152917047981	9.438667482154827e-12	3.2135010911342307e-10	16.289630404663168	Up	9.493021548290224
SYN2	1.7469540344922194	7.768476791798365	8.264784799944396	9.452921047397452e-12	3.2135717777623516e-10	16.28813296641099	Up	9.49301199532166
RNF157-AS1	2.12140369655506	7.053326866249557	8.261465887272879	9.582407183732927e-12	3.2479391697277865e-10	16.274632097278385	Up	9.488392113205169
CATIP-AS1	2.1356586481109847	8.215936695631605	8.256188227084133	9.791981012964377e-12	3.3091688861981087e-10	16.253162980251297	Up	9.480281067692903
TP73	1.685793358865899	8.252368841742108	8.255773508545003	9.808642543622948e-12	3.309910512618723e-10	16.251475919600136	Up	9.480183747735232
HMGB3	2.4655410830563635	9.870392450564616	8.238239820605438	1.0539660712938016e-11	3.5409236042776635e-10	16.180147232892985	Up	9.45088344308051
SLC30A5	1.7960352714515446	8.803500815727762	8.236422500497671	1.0618482074007562e-11	3.557274238345826e-10	16.172753959528347	Up	9.448882652776168
SNX27	1.014994338329406	8.761760007812507	8.236400836151864	1.0619425258054106e-11	3.557274238345826e-10	16.172665823750727	Up	9.448882652776168
MKS1	2.54491560324767	9.490257039856624	8.23099192757594	1.0857553321135649e-11	3.6264228092593065e-10	16.15066088396989	Up	9.440521562341079
DTL	2.4411814455102796	7.357278844783053	8.217326175911378	1.14832834404631e-11	3.8298256827165494e-10	16.09506312091956	Up	9.416820992808704
ATAD3A	0.9195607140257468	8.548460264935214	8.207625011498532	1.1949277678967504e-11	3.9678885924107034e-10	16.055593479892668	Up	9.40144053016214
CDCA5	2.2335448559421156	8.146070250158592	8.178380587724087	1.3471761287833267e-11	4.415765422698242e-10	15.936604687888517	Up	9.354994005553685
TRIOBP	1.8054007560712737	10.538204466885468	8.174763148911804	1.367311124818501e-11	4.4689587463889255e-10	15.921885540423016	Up	9.349793654356947
KIF4A	2.262466852508539	8.009727087888624	8.171315737299606	1.386780043400794e-11	4.526125622391835e-10	15.907858104353146	Up	9.344273396392238
MON1B	3.2111247352294594	11.081318892333712	8.161312835809449	1.4448555962455872e-11	4.708953160470482e-10	15.867155899398467	Up	9.32707562942357
S100A1	3.22471761443634	9.149468640784436	8.160954860282894	1.4469784868708416e-11	4.709163698594307e-10	15.865699265694465	Up	9.327056212474982
G6PC	2.667091620658419	8.869795178124727	8.154227534833757	1.4874591427277457e-11	4.827174145598312e-10	15.838324980107632	Up	9.316307033249227
DUSP23	1.9059416701840457	10.966775935788167	8.1350113638342485	1.6094427505288582e-11	5.19357414518332e-10	15.760130033431224	Up	9.28453366386714
MIR6787	1.8864154825536297	9.442675267105267	8.131414734009924	1.6333627549576185e-11	5.25593621247192e-10	15.745494217794716	Up	9.27934991413693
ELL	2.215068341637654	8.267609944356028	8.12895219937557	1.6499451810388886e-11	5.301839297329877e-10	15.73547333798317	Up	9.27557344019036
HLA-J	1.7838316119556747	10.48172503739514	8.122400527267434	1.6948886034292782e-11	5.438619405029235e-10	15.708812181603284	Up	9.264511332080033
RBM15B	0.9043909078069188	8.878429580094059	8.120591532226493	1.7075125052276946e-11	5.47145358642919e-10	15.701450666862542	Up	9.261897280485234
FXR2	2.475672147971041	9.372388856586726	8.116966617708654	1.7330925838933493e-11	5.545653877887542e-10	15.68669939573465	Up	9.256047239629119
CSPP1	3.0843895493261027	8.690344519322108	8.115259274836717	1.7452733882992e-11	5.576830984762205e-10	15.679751485309517	Up	9.253612517333329
SLC2A1	2.1918064042849217	10.54425511534879	8.087309336588124	1.9573125088694588e-11	6.228282738584748e-10	15.566008878910168	Up	9.205631680461655
RPARP-AS1	1.1529343705388646	8.01392263951996	8.085371811122785	1.9729329466629327e-11	6.269268456486282e-10	15.558123952939049	Up	9.202783132829033
EPCAM	2.605715093846152	11.695001029818256	8.083399073161866	1.988965460993079e-11	6.311448097373184e-10	15.550095710211888	Up	9.199870984884948
FTSJ3	2.086299246964691	10.988020115231372	8.068977771490562	2.1101970938349784e-11	6.640880235192636e-10	15.491406406446828	Up	9.177774351964736
GPR56	1.8693200514335508	9.672124858738906	8.054484211455096	2.2394879350693517e-11	7.018800611842697e-10	15.432422359173248	Up	9.153737094730744
GYG2	0.8519815129210793	7.935214427739591	8.043617576429895	2.341598528136389e-11	7.318774962463447e-10	15.388198379269973	Up	9.135561606313995
ETV6	1.309097699309966	10.202880110167303	8.042884015119535	2.3486571340314088e-11	7.330822178650012e-10	15.385212994559687	Up	9.134847314905002
LOC101929591	1.5241539898732412	5.190263842509481	8.042238008833344	2.3548908819199187e-11	7.34026546150488e-10	15.3825839330469	Up	9.134288233492377
PDE3A	2.3368883437525163	9.543899010638636	8.034499290591487	2.4308667017501294e-11	7.566775410794724e-10	15.351089509666917	Up	9.12108915612098
ATP4A	2.6773827454387886	8.167558069341354	8.019218221512533	2.5881697421964443e-11	8.034563844194361e-10	15.28889966723747	Up	9.09503769391008
EZH2	1.6878906465464985	8.252915170242769	8.015151222858636	2.6317250899566408e-11	8.158704381181299e-10	15.272348064090409	Up	9.088378802616068
MEX3A	1.5227195256500492	7.931212176486491	8.00914495535521	2.6973938905593338e-11	8.339685786771215e-10	15.247904159474515	Up	9.078850311909274
LOC100507501	2.599780847305194	9.54375599669348	8.008672414610702	2.7026294007593737e-11	8.344596229416153e-10	15.245981045555382	Up	9.078594672714981
CXorf31	2.2648149377379143	6.932385450430721	7.987949939600964	2.9425064942328344e-11	9.024343978760459e-10	15.161646368036454	Up	9.044584359146368
TNAP	0.8323861028562822	6.322329629925419	7.977769609443442	3.0680403117274285e-11	9.384183728878587e-10	15.120215543354352	Up	9.027603497945275
CEP41	1.6884465314957762	9.344304437318698	7.961461636796295	3.2803956237670466e-11	1.000695619682217e-9	15.053847685936503	Up	8.999698001236478
GABPB1	1.8927341603908523	8.968718143594657	7.960530347864677	3.292956952759216e-11	1.0031899084178175e-9	15.050057686193188	Up	8.998616845273824
CHRNA2	1.6634664934373822	8.651344050282935	7.953109524914904	3.3947845645884956e-11	1.031464489418595e-9	15.019857816124478	Up	8.986545719038402
RNASEH2A	1.5613281824041962	8.727066680040394	7.936927965068962	3.6278821681439506e-11	1.099368425496231e-9	14.9540059924623	Up	8.958856740382542
LOC100134368	1.7712686418334131	7.127678219841175	7.933592155386025	3.6778903518653315e-11	1.1122585758814064e-9	14.940430879446884	Up	8.953794237012946
KIF11	2.3474983996218315	8.118048859849852	7.933443012416511	3.6801422349850293e-11	1.1122585758814064e-9	14.93982394196376	Up	8.953794237012946
ERBB2	1.5561875405964898	9.759068096691102	7.918260501457215	3.9167472808906745e-11	1.177546137181311e-9	14.878039380092908	Up	8.92902206786725
EIF4G1	2.291555239770532	9.014183156058174	7.915410949089631	3.96282205861168e-11	1.1898347228212154e-9	14.866443413107003	Up	8.92451336125606
CABLES2	0.9995939694696654	8.818316369655058	7.912315997727641	4.0134790963778066e-11	1.200318800601671e-9	14.853848881648396	Up	8.920703391490594
BUB1B	2.6231369775357427	9.148436149342468	7.905054412680864	4.134891265335082e-11	1.2317991830677255e-9	14.824299001526054	Up	8.909460088270848
STON2	2.2552786834685845	9.168446389984648	7.904672552958165	4.141376591120479e-11	1.2321268534232175e-9	14.822745093972197	Up	8.909344577150785
CEBPA-AS1	1.993599276522172	10.427363299684815	7.899343078767247	4.232958946909569e-11	1.257738542160312e-9	14.801057899164586	Up	8.900409630352218
MDM2	2.2502103174576815	9.370093023522848	7.897879194762586	4.258467241801138e-11	1.2636766799632715e-9	14.795100963917442	Up	8.898364028956722
MATN1-AS1	2.2457309650724744	8.06596935408932	7.886772426649805	4.457078650530464e-11	1.3209002907446434e-9	14.74990512399554	Up	8.879129964227822
TDO2	2.986120836172393	8.09087937081528	7.884412956707934	4.5004494948347614e-11	1.332028253458273e-9	14.74030406542128	Up	8.875486563310695
FJX1	1.7949848646548556	10.255723445296343	7.880053199383395	4.581702376551369e-11	1.354325176655281e-9	14.72256364919426	Up	8.86827704800556
GPRIN3	2.687481526863193	9.304145919267802	7.879657993431886	4.589139967870248e-11	1.3547733332245601e-9	14.720955513567857	Up	8.868133360409015
PRKG1	1.3461064508796523	9.303521473069129	7.868771636686184	4.798832335563375e-11	1.414851610893743e-9	14.676658330575748	Up	8.849289106393659
MELK	2.5677819500028907	9.324947507112432	7.865417188882587	4.8653567219982666e-11	1.4326190018352427e-9	14.663009130466794	Up	8.843869292785477
TBC1D22B	1.3065883545295789	8.422989648619486	7.838797016701817	5.4270478649894076e-11	1.5877931982492666e-9	14.554696277638849	Up	8.799206062808018
SPC25	1.396948711525163	7.61785943960559	7.835237551662737	5.5069126350307916e-11	1.607049160419254e-9	14.540214046001465	Up	8.793970837752989
EPHX4	2.917982368139608	6.791082039992974	7.825517568591147	5.7310400055393835e-11	1.6703243858182875e-9	14.500667593365067	Up	8.777199178379192
RP11-12M5.1	2.5157878798751483	8.44327129541456	7.824123334403366	5.763928282288761e-11	1.6777724576397527e-9	14.494995149034846	Up	8.77526693927147
UBE2C	2.0192377969615594	9.03399806898638	7.811095845256273	6.08049730278509e-11	1.7676708740841175e-9	14.441994027228514	Up	8.752598593890365
KIF20B	1.11594542113511	8.131114463896315	7.803836830139083	6.264373892110873e-11	1.816509635964571e-9	14.412462412748395	Up	8.740762294010933
CRABP2	2.5980859728616412	10.073389463546816	7.798216948853054	6.410539436132901e-11	1.8507171650879174e-9	14.38959975108336	Up	8.732659947009994
CSH1	1.5059780338434168	8.244001675422798	7.798030608603572	6.415443864261539e-11	1.8507171650879174e-9	14.388841694210823	Up	8.732659947009994
C10orf90	2.101401493832638	8.17551311102071	7.797751878919041	6.422786962191559e-11	1.8507171650879174e-9	14.38770778580808	Up	8.732659947009994
MUC1	2.4164147790235333	11.342529405439567	7.795688862481315	6.477398771914376e-11	1.864105742171434e-9	14.37931520394282	Up	8.729529455748654
CDCA7	2.27672177429931	7.871197879746023	7.792714361924401	6.556957485903074e-11	1.884631034170558e-9	14.367214714580731	Up	8.724773661642955
ACTR3BP2	1.9381505691724747	8.343004345108195	7.791213633120416	6.597467397071754e-11	1.890458848516826e-9	14.361109688948954	Up	8.723432771915082
LIMS3	3.195237283870431	8.130373175586875	7.790725366121749	6.610701301419847e-11	1.8905779384398086e-9	14.359123406384736	Up	8.723405414288415
LOC101928817	2.1294316835162537	6.985439529936652	7.776229737503849	7.015912686217372e-11	1.998967202340813e-9	14.300156514391723	Up	8.699194331424282
AX747140	1.3333473663287014	7.31025877018443	7.772271841273136	7.130804891626306e-11	2.026654473484699e-9	14.284056740089014	Up	8.693220288332244
NOD2	2.0648696176618344	7.970487993168414	7.762761401092164	7.414628387977726e-11	2.102097681394577e-9	14.245371615532036	Up	8.677347106811592
ARAP3	1.2791091114050488	7.882660982180572	7.7594338378785475	7.516578278646211e-11	2.128363792538944e-9	14.231836624149352	Up	8.671954137848374
D21S2088E	2.2223244276392924	8.388268216615893	7.725472060616042	8.64070560861981e-11	2.4406259706125013e-9	14.093707309255263	Up	8.612498771728006
PHEX	1.3716771247479065	6.488065837019796	7.720569751738239	8.816295221746168e-11	2.487151891224791e-9	14.07377047081582	Up	8.604297691406193
PRR5L	1.32146795958964	7.8342716572594915	7.717754196409888	8.918749756414267e-11	2.5109846992797132e-9	14.062320315828746	Up	8.600155933658497
ST3GAL4	2.1027362210454976	6.516665299270958	7.709776725651781	9.215548282499616e-11	2.590203060876028e-9	14.02987883501897	Up	8.58666618774845
SHBG	2.5266543161958124	8.713271532128461	7.705570901718053	9.375977669184148e-11	2.632061264948026e-9	14.012775810214578	Up	8.579704006122215
E2F8	2.193832169043965	8.043226183921266	7.701061844798366	9.551075377152095e-11	2.674651818284734e-9	13.99444010440864	Up	8.572732745694926
AOX2P	1.098338811923174	6.0358049111820264	7.686315499537244	1.0146855924030371e-10	2.8276481934944082e-9	13.93447842247286	Up	8.548574624977098
LARGE-AS1	0.9185949587054064	7.972236450740564	7.6859267976787	1.0163052745712663e-10	2.8287163475566915e-9	13.932897946304266	Up	8.548410599685864
CSTF2	0.9223468796233716	8.503788180127192	7.681016374688919	1.0369903882662492e-10	2.875794314320426e-9	13.912932281599286	Up	8.541242179259282
LOC101928580	2.7978857420607417	8.908180340562797	7.670392841776935	1.0831929951833488e-10	2.996659315211589e-9	13.869739162852987	Up	8.52336262840366
DNAJA1P4	3.2213846909686294	8.349526228363958	7.669525203245241	1.0870560747060042e-10	3.003714484685829e-9	13.866211639285652	Up	8.522341351168036
CENPA	2.5010634229323276	8.397969568981777	7.667050470580713	1.0981503924264148e-10	3.027058172087222e-9	13.856150315971169	Up	8.518979232966874
PCSK9	1.6640667144201815	7.779325175506325	7.663818189087243	1.1128114034950515e-10	3.0637800361688664e-9	13.843009309325982	Up	8.51374241805616
DSCC1	1.2487449080795416	8.256904469611873	7.654776990376286	1.1548675530823804e-10	3.161329381683897e-9	13.806253209717983	Up	8.500130252279586
ILDR1	1.0169235808703876	8.114709941529933	7.654717049841488	1.1551516076260927e-10	3.161329381683897e-9	13.8060095341609	Up	8.500130252279586
AC024560.2	1.7349102560339065	8.099816220181793	7.65076241471993	1.1740474499863256e-10	3.2033323029336803e-9	13.789933001440396	Up	8.494398006748398
CWC22	1.1181289217854804	9.839722909512169	7.650627013604522	1.174699856707617e-10	3.2033323029336803e-9	13.789382570670243	Up	8.494398006748398
SULT1C2	2.8568037111259583	7.231203753696822	7.6397127700575025	1.2284974041864694e-10	3.342068027393845e-9	13.745015678829828	Up	8.475984714340568
BC048997	1.272291275390975	5.8876817282746075	7.63389384765731	1.2581785578530808e-10	3.414693621010751e-9	13.721362762505873	Up	8.466648256747744
RP4-798A10.7	1.3899158718769875	7.290270504727789	7.630993097002245	1.2732412449594827e-10	3.447394845376095e-9	13.709572046041323	Up	8.462508972075796
SOX9	2.553011471305352	8.741953717581145	7.630477532362767	1.2759372057471656e-10	3.4506107955424823e-9	13.707476447698	Up	8.46210402328763
HIST1H2AE	2.1183457949129627	7.425920462427243	7.630006323435651	1.2784062124275048e-10	3.4532061079254883e-9	13.705561146765415	Up	8.461777499593387
CENPM	1.9378572463343096	7.88319617741165	7.627669301591867	1.2907222976888823e-10	3.478761655847534e-9	13.696062051365782	Up	8.458575325519766
PROM2	2.01570310079833	10.04045523635297	7.627634215467415	1.290908101671645e-10	3.478761655847534e-9	13.695919440879209	Up	8.458575325519766
FAIM3	2.173923783978018	9.436840392675911	7.62548728939302	1.3023284737286166e-10	3.501289441884491e-9	13.68719314372386	Up	8.45577198583098
LOC102724561	1.4834660602291558	8.804393061738157	7.624349128861389	1.3084236968136403e-10	3.5135476243426373e-9	13.682567079427606	Up	8.454254155447087
LOC286009	1.4270680538567395	8.209271327632049	7.59367495271381	1.4838751456106455e-10	3.956957153670097e-9	13.557905253841362	Up	8.402638652292827
SORT1	1.0770023848973231	9.265745642340804	7.592060015355497	1.4937376851627824e-10	3.973863313818523e-9	13.551342795843492	Up	8.400787075091145
AL832909	0.9613510237217682	8.417996508133726	7.586031640432468	1.5311353662416348e-10	4.068623233942203e-9	13.526846582847025	Up	8.390552525186237
NCAPH	1.7933645922154329	7.629318079812322	7.560376235976763	1.701038751696933e-10	4.488819561715586e-9	13.422608663592872	Up	8.34786785169931
ESRP1	2.4401329221420074	10.18658248597464	7.555653346316317	1.7343095583298375e-10	4.566083818760455e-9	13.403421822338476	Up	8.34045612050872
CD80	1.9863741428398232	8.244736924237278	7.544494249650818	1.8155258193799127e-10	4.774415542711842e-9	13.358090637626368	Up	8.321079784731657
BIN1	1.2222892397885996	9.244826240493442	7.543353655812865	1.8240381375275057e-10	4.791293748391712e-9	13.353457477077905	Up	8.319547202259194
EFCAB1	2.2008438815859064	8.500271832482232	7.539475959104535	1.8532768514003263e-10	4.862513885686705e-9	13.337706365714528	Up	8.313139145467058
LOC645321	1.6239649921185029	7.69492213694166	7.530272151829269	1.9245634175315992e-10	5.0379961590052024e-9	13.300322753984211	Up	8.29774216794618
RAB7A	1.2060304378801447	10.734628481729803	7.519355045144929	2.0126789052954702e-10	5.256630213956058e-9	13.255983916753683	Up	8.279292573045666
CYTH2	2.51211822652198	9.537896834039088	7.50805351556018	2.1081434573712638e-10	5.4747121635865105e-9	13.210088199703922	Up	8.26163870919143
MXD3	2.0928753056126297	9.726902570333907	7.503201470376108	2.1505039721119538e-10	5.572070257978414e-9	13.190385362538487	Up	8.25398341621434
SPINK1	1.6149674921669082	6.34367318709203	7.493141814647471	2.2410565422119182e-10	5.787035285470257e-9	13.149538576441936	Up	8.237543869591127
RHPN1-AS1	0.9190825916940596	7.335078352093842	7.486231066826501	2.3054606340258783e-10	5.933254650829929e-9	13.121479968539589	Up	8.226707011669808
RP5-1189K21.2	1.6800528365362188	5.6409818743415805	7.478155765367375	2.383062854935683e-10	6.098668351014931e-9	13.088695395010069	Up	8.214764983176218
PDE9A	1.640012368062003	7.153031100293183	7.473136814347147	2.4326027896007717e-10	6.218493767963805e-9	13.068320427306972	Up	8.20631479657585
PPM1G	1.3640067088463592	10.005325723137496	7.457405224529463	2.5946439362916536e-10	6.595873179824082e-9	13.004462731720968	Up	8.18072770321431
HEY2	1.6530680978400083	8.066630977301495	7.456007167752251	2.609555614086256e-10	6.626417635369527e-9	12.998788211817145	Up	8.178721195827949
LOC101929681	1.2653473281458325	8.32162957101844	7.44530544087922	2.72657071022286e-10	6.8992248128367735e-9	12.955353989179631	Up	8.16119970323666
PABPC1L	1.447026192997459	8.624129340809382	7.445119531659367	2.728649109092836e-10	6.8992248128367735e-9	12.954599495819032	Up	8.16119970323666
SBK1	1.7048674135331794	8.397129107036523	7.445083495079607	2.7290521681967216e-10	6.8992248128367735e-9	12.954453245247194	Up	8.16119970323666
LOC284798	1.4560132247050983	7.306694349240483	7.444367052147866	2.7370777318375285e-10	6.911876537164549e-9	12.951545649937618	Up	8.160404028009927
PAX9	2.5323165890695867	7.6011438090869	7.444036691889614	2.7407863468184733e-10	6.913610896235926e-9	12.950204930651488	Up	8.160295066560009
B3GNT2	1.052822947145046	11.028732337157177	7.431475774288896	2.885579157767622e-10	7.23894359107077e-9	12.89923161482466	Up	8.140324807565797
MFSD3	1.1760595229748363	8.0109212407552	7.430827720124534	2.8932532119927764e-10	7.250245370994823e-9	12.89660193226612	Up	8.139647295295788
ENTPD1	1.8650617899219943	8.562133281155603	7.425605843445439	2.9558371827510576e-10	7.390885126137864e-9	12.875413180700193	Up	8.13130354775152
ECE1	1.2718090489445393	7.792335729516432	7.424404892017667	2.970420622595147e-10	7.419241640213358e-9	12.870540256855463	Up	8.129640483980062
PPEF1	1.352460610036359	6.334197615078887	7.41082209825752	3.1404451186800695e-10	7.835359200684986e-9	12.815431664840876	Up	8.105941089138012
CKS2	2.348574210770254	10.067103996284963	7.410253491362734	3.147770811707886e-10	7.845081525170449e-9	12.81312486719425	Up	8.105402538916088
PRC1	2.2677319831922915	8.85373055348435	7.381279497591137	3.544537878163305e-10	8.786076068743041e-9	12.695598482281738	Up	8.056205040987345
CCDC88C	1.957110328248893	8.009125848638142	7.373167267847826	3.664312429668183e-10	9.0633301706355e-9	12.662699920726116	Up	8.042712198681532
LOC101927884	2.306876703675832	8.55481452429113	7.370561466783009	3.7036369449952695e-10	9.140831679023384e-9	12.652132933094514	Up	8.039014288163493
FLJ41455	2.697965263751417	6.5037443011855025	7.366805452679619	3.7610617253866e-10	9.272557243008625e-9	12.63690218767344	Up	8.032800476926715
CNOT7	1.1659509884570394	11.424712120740873	7.359516953689878	3.875041131057582e-10	9.522778306924429e-9	12.607349019093617	Up	8.021236326055272
DKFZp451A211	1.287901782107319	7.975990688374234	7.355814236559236	3.93425907825729e-10	9.647579148065223e-9	12.592336333285068	Up	8.015581649820367
GYLTL1B	1.012616933857518	7.5494615034917425	7.344356799441016	4.123280737979711e-10	1.0078690171392929e-8	12.545886292775943	Up	7.996595905221715
MRPL34	2.1806560119269855	9.03820950617124	7.340783096108844	4.1840728053142786e-10	1.0216371580873574e-8	12.531399315229349	Up	7.990703319680796
IL13RA1	1.4579494072248913	11.61067906338114	7.338866720444756	4.217039727391446e-10	1.0274936307027572e-8	12.523631025097984	Up	7.988220861577655
FZD10	3.55093090541829	7.833848159447954	7.3370699784229245	4.2481840142547295e-10	1.033980873001425e-8	12.516347851380218	Up	7.985487494923669
CDC20	2.619275518804524	9.106868036290496	7.328208041390769	4.405184912652335e-10	1.0687828803454168e-8	12.480427949491723	Up	7.971110511297294
ZNF92	0.988807740234586	8.861582226261438	7.32344751461055	4.491900819891371e-10	1.0875153318338064e-8	12.461133836912772	Up	7.963564611629525
HS6ST1	1.4916206051233232	9.107271867867505	7.316101443481836	4.629067767343277e-10	1.1160004367655094e-8	12.431362938157296	Up	7.952335635429969
DGKK	1.6097284931802358	8.671724329786006	7.315378968031019	4.6427816175338627e-10	1.1181284276584974e-8	12.428435162613692	Up	7.951508310742871
EYA2	3.1526871647664727	9.584713741708253	7.299168152025652	4.961378314415074e-10	1.1886007796387698e-8	12.36274921014465	Up	7.924963989210988
LOC100130357	2.050009652740405	7.309516437028865	7.2937498183938	5.072658050145474e-10	1.2127204130541097e-8	12.340797288816912	Up	7.916239312128887
FAM231D	0.6952997395775302	8.028487020742599	7.29095585527202	5.13100897546264e-10	1.2253899201420646e-8	12.329478392851968	Up	7.911725696425058
CCDC177	2.761106876213664	8.057111955843945	7.28815673036872	5.190139189389125e-10	1.2382189208971198e-8	12.318139003939493	Up	7.907202563932847
KIF15	1.9814219712290944	7.27541905028837	7.285477133664862	5.247381200227134e-10	1.2505711924999648e-8	12.307284223553648	Up	7.902891579719319
PTPRU	0.8009184590092966	7.45905518868916	7.284588658572543	5.266499655871101e-10	1.25382149455437e-8	12.303685184481694	Up	7.901764289221627
SMC6	0.913078067718633	8.442218635973003	7.28359893214433	5.287878698723746e-10	1.2566508119777205e-8	12.29967604620314	Up	7.9007853838088495
SRD5A2	1.2473061302321131	6.364022409919662	7.283530089015616	5.289368993113966e-10	1.2566508119777205e-8	12.299397181593964	Up	7.9007853838088495
CENPK	2.2388084384975135	7.69479768230089	7.278059374783984	5.409146837207378e-10	1.2797918354546808e-8	12.277237642212349	Up	7.892860664778187
SMG7-AS1	1.4466020912139026	5.79631870125512	7.274037232021465	5.498931631822653e-10	1.2983493994269402e-8	12.260946690753162	Up	7.886608418611494
CELF3	2.3876646532514467	9.29601929013699	7.269567777940319	5.60044649763269e-10	1.3197664489954324e-8	12.242845028249754	Up	7.8795029164356
C9orf16	1.3343014379932132	9.74271048260172	7.262697175530891	5.760156315362117e-10	1.3516576034786656e-8	12.21502066894465	Up	7.8691333082112545
MMP7	3.7860254597742022	9.15446713566246	7.259330516154519	5.840066153467878e-10	1.3690048516925369e-8	12.201387433076253	Up	7.8635950127428815
FASN	0.7560554865373783	7.873292972149477	7.249441681967781	6.081235301930924e-10	1.4226235426674604e-8	12.161346438360344	Up	7.846910008539921
C16orf70	2.0762526537266597	9.602576661163148	7.24370996970216	6.225541843955055e-10	1.4534099168147728e-8	12.138140638209446	Up	7.837611880881963
LOC101928554	3.063869715824312	8.103983667039799	7.242823345120943	6.248167288391638e-10	1.4572050906331531e-8	12.13455115767347	Up	7.836479320253327
C16orf59	1.1136642959914085	7.433689004578516	7.233222837909597	6.498473903813011e-10	1.5124983158223593e-8	12.0956866172369	Up	7.820305100265221
SZRD1	0.9732365010995148	8.531818972348246	7.23111079744598	6.554867846793684e-10	1.5240733888901695e-8	12.087137424750672	Up	7.816994119858201
LINC00535	0.6384790683316561	6.902855147134254	7.229764725833487	6.591063934142131e-10	1.5309335202968307e-8	12.081688884273202	Up	7.815043667822382
BAK1	1.6373720001241514	7.241317477803023	7.223905917194041	6.750944652977957e-10	1.5664793378852203e-8	12.057975221916749	Up	7.805075329158665
LOC100130111	1.0789398608225138	6.417293942736924	7.222126748839915	6.800257646721167e-10	1.5763231479162473e-8	12.05077439791281	Up	7.8023547468903605
NRAS	1.0460861655143765	11.34867014014834	7.221833565027953	6.80841819476668e-10	1.5766174076727417e-8	12.049587813726856	Up	7.802273682635193
SPRN	1.8668992029110536	8.656273929813002	7.2209187886596835	6.833943129708533e-10	1.5809280572760522e-8	12.045885530297117	Up	7.80108789290076
FOXQ1	2.7077168851338955	9.735961612556263	7.217836060984978	6.920665037109589e-10	1.5993726806467705e-8	12.03340947916896	Up	7.796050326566654
GSN-AS1	1.7433313248773574	7.765731114006531	7.217100010242557	6.941533076349375e-10	1.600860926557931e-8	12.030430705270504	Up	7.795646395408585
RP11-960B9.2	1.8956622143084616	7.10042275672952	7.203567932600278	7.336564683503985e-10	1.6869674712953538e-8	11.975672613918585	Up	7.772893291550253
DDX11L2	0.7257516766645962	7.387444789470252	7.191290413074638	7.714334090739447e-10	1.7684994956115015e-8	11.926000773536824	Up	7.752395059713054
CRADD	2.440137504876782	9.39481373932784	7.169191902885297	8.443822341684328e-10	1.9260838619680537e-8	11.836619217952272	Up	7.7153248075556835
ECT2	2.280472856001974	9.622912622059603	7.164856125091638	8.594824060108869e-10	1.9585754947333747e-8	11.81908598005004	Up	7.7080596835931585
CENPI	0.7667454649128231	7.641495949968528	7.151132081310851	9.090766975306413e-10	2.063369619325749e-8	11.763595981208084	Up	7.685422968219233
RP11-410D17.2	1.8696896855739684	6.672108264262192	7.147092575737931	9.242104171547401e-10	2.093565359810227e-8	11.74726550871278	Up	7.679113476157117
DHRS9	2.767667090317691	8.693890702362784	7.141612254429811	9.451443545802763e-10	2.136228283849675e-8	11.72511197853904	Up	7.670352339134725
RP11-416N2.4	1.0860825541415782	6.954869453724776	7.14143087749301	9.458452080684123e-10	2.136228283849675e-8	11.72437881830535	Up	7.670352339134725
AK7	2.6223000799924803	9.497455434292768	7.13359166890262	9.766367648829176e-10	2.2035968978063385e-8	11.692693327444658	Up	7.656867847692135
CCDC138	1.748851505728724	8.335422879918966	7.124338330938142	1.0142711944436587e-9	2.2817611266151885e-8	11.655297324560088	Up	7.641729823030405
ELL2	2.623600036174759	10.721343268862611	7.117502102677822	1.0430003444096584e-9	2.3417865436455913e-8	11.627673433629468	Up	7.630452693867286
LINC00511	2.0385550228588114	7.083554505559333	7.116266742830873	1.0482778001923976e-9	2.351328214764889e-8	11.622681920432086	Up	7.628686744795812
ZNF611	2.0986335596314944	10.793535493784049	7.108320170752315	1.0828676852470647e-9	2.4170663190992778e-8	11.590576030185552	Up	7.616711433322708
PPP6R1	1.2473263503158174	7.648308307694313	7.104204948442808	1.1012252151414872e-9	2.4556463642516657e-8	11.57395134372372	Up	7.60983
SYNE4	1.595365368012164	8.741112721784027	7.091206792487019	1.1612704179772215e-9	2.5819927981439122e-8	11.521449112730403	Up	7.588044973429289
PRADC1	0.8266358609510771	8.327691971200396	7.086781882421517	1.182447105606884e-9	2.6239774325101753e-8	11.503578701362976	Up	7.581039904425359
LRP8	1.8498774016068664	8.038574507426599	7.083856937125632	1.196656134860031e-9	2.652935630761885e-8	11.49176680022406	Up	7.576273287350523
GINS1	1.84429580687456	8.91291634983948	7.079017104470658	1.2205421701410394e-9	2.701460706458436e-8	11.472223287832914	Up	7.568401345019986
PAX7	1.4695064427444349	7.117090504827625	7.078944157679508	1.2209057959167896e-9	2.701460706458436e-8	11.471928737471655	Up	7.568401345019986
ATRIP	0.6677742778542051	8.911298824789768	7.0769941675106365	1.2306662441256699e-9	2.7178004825628572e-8	11.464055053457194	Up	7.565782428583082
XAGE1B	1.5761128207162782	6.290415480527639	7.07556099301514	1.2378893774505951e-9	2.7311158212817908e-8	11.458268345633268	Up	7.563659881889934
CASC5	1.783733186893162	7.690491509494313	7.073853856347074	1.2465484255578712e-9	2.7475704651578555e-8	11.451375657772648	Up	7.561051160692717
SMARCD2	1.2014196208832375	9.94330509546991	7.0717567596167745	1.2572681198503643e-9	2.7685310215646282e-8	11.442908765834396	Up	7.557750605827736
HYOU1	0.995945021734471	9.247091544068722	7.070750328472323	1.2624452532590203e-9	2.777258168203185e-8	11.438845478352151	Up	7.556383747252042
DAZ1	0.6707910998822317	6.900908487126613	7.068919040311698	1.2719200540916083e-9	2.795413920995381e-8	11.431452165057568	Up	7.553553876402011
ENTHD2	2.0988992314877386	8.969812049105496	7.068082790992438	1.2762702154695011e-09	2.800242090075252e-8	11.42807612347874	Up	7.552804420858175
CHKA	1.1318519789395118	8.783265060811303	7.063558950359987	1.3000615424384687e-9	2.8463261272200697e-8	11.409813703728153	Up	7.545715340675627
BSPRY	0.8406575585009648	7.511992762442616	7.062269969599291	1.3069209690990043e-9	2.8586084944566077e-8	11.4046104543978	Up	7.543845320101921
FANCI	1.283239133197993	8.362905031864559	7.057969903104677	1.3300660774083144e-9	2.900913420879392e-8	11.387253187630616	Up	7.537465232726267
UHRF1	1.7459213895220556	7.515265084222884	7.037029764867988	1.448747811538328e-9	3.153748922948183e-8	11.302747661792974	Up	7.501172884792321
C14orf105	2.3439632648226683	7.682575282039604	7.036776041331683	1.4502487096936806e-9	3.154015230901304e-8	11.301723942342434	Up	7.501136213771726
LOC100268168	1.5655314462496763	6.156585384121853	7.020308834997955	1.5510474131570934e-9	3.3572766098033254e-08	11.235292796206224	Up	7.474012875266059
ZNRD1-AS1	1.8532890251783616	7.819244648428252	7.019765346954737	1.554490607770873e-9	3.3615492074848594e-8	11.233100638685396	Up	7.473460527014426
PKP3	1.7671343127414376	8.888688479631046	7.017762038967909	1.5672481941832426e-09	3.385936868245364e-8	11.225020498080164	Up	7.470321143695564
NUSAP1	2.0431030182360628	9.60027439146786	7.0000309574815995	1.68481002973261e-9	3.6330601951227514e-8	11.15351756294706	Up	7.439727406378113
CCNB2	2.11913658481416	8.901621906936805	6.997682547793034	1.701025598376911e-9	3.654250203311301e-8	11.144049137362	Up	7.437201720202591
LOC100652770	0.9133650175510296	6.974592616511196	6.98203408642836	1.8131187884703774e-9	3.8804812686074613e-8	11.080968142931088	Up	7.411114408596814
C8orf4	3.984890597046827	7.908989234370083	6.979708307346307	1.8303954616122042e-9	3.9137960529182825e-8	11.071594296955674	Up	7.407401809081675
ADCY5	1.7752581821183169	7.741415318752733	6.977771948405588	1.8449044207876546e-9	3.9411361571616016e-8	11.063790307203975	Up	7.404378561002831
PEX16	0.8465187974220907	9.714584361991564	6.971490450175889	1.892764339798879e-9	4.0357488034469455e-8	11.03847645745531	Up	7.3940758733251
HIST2H2AA3	1.5989640917490604	9.40038635398264	6.965862261444015	1.936696004973965e-9	4.1218295718883126e-8	11.01579811299954	Up	7.384909969257107
SPRY1	2.4074342564594824	9.81439438675764	6.964673978558954	1.946100390154914e-9	4.137995429958576e-8	11.011010351868324	Up	7.3832099933089665
ARPC5L	1.1768578864715806	10.675716518177184	6.963976172685606	1.951644194898061e-9	4.14208418692697e-8	11.008198846538342	Up	7.38278107841546
KLK6	2.793904260882651	8.746346960547003	6.963442744008089	1.9558926907483513e-9	4.147253834256862e-8	11.006049654614513	Up	7.382239382662652
S100A2	2.723266771229694	8.662411062016677	6.962075290242668	1.966825907590785e-9	4.166574994423108e-8	11.000540270304985	Up	7.380220796876604
TSPO2	2.6453486359156173	8.618542163735512	6.95861759913695	1.994743544590416e-9	4.2218073595452483e-8	10.986610139858572	Up	7.374501587370196
IFIT1	1.0581500567986648	10.74100607330062	6.956151496768129	2.0148958306783782e-9	4.2605177181229777e-8	10.97667546373878	Up	7.370537624262878
LYPD3	2.7601849581902265	8.49326660591006	6.952426174740993	2.0457232694423733e-9	4.317721649591519e-8	10.961668986194509	Up	7.3647453587463305
RFPL1	1.263652130262495	4.618889137726162	6.935338237381846	2.193256926971334e-9	4.620582433902133e-8	10.892849607693392	Up	7.335303277282229
CCNE1	1.8080691385737249	9.829496610234312	6.929426096367542	2.2467303652279086e-9	4.7236663727282165e-8	10.869044994105248	Up	7.325720783708782
RNF144A	1.935267715427128	9.121358866125473	6.929245750636805	2.248381782377301e-9	4.7236663727282165e-8	10.868318897795806	Up	7.325720783708782
RSPH3	0.8512924826327968	9.432541529801028	6.9267065432172865	2.271761917710779e-9	4.7684074234224696e-8	10.858096000247048	Up	7.32162664458812
MNAT1	1.809293217566416	8.941625622613847	6.921081642239866	2.3244198259487642e-9	4.8700001096961334e-8	10.83545200948094	Up	7.312471029002937
UBAP1	0.8808456408352718	9.053378747075076	6.917886961816311	2.354866435375403e-9	4.9292762282665926e-8	10.822592495252165	Up	7.3072168440383045
ALDH3A2	1.7220096595981325	11.49776425618365	6.913698791902312	2.3953837748851712e-9	5.0095050626689074e-8	10.8057352348441	Up	7.300205180154681
LOC389247	1.646624370000314	7.361756006648908	6.909294168713729	2.43874424064712e-9	5.095527806553923e-8	10.788008399713384	Up	7.292810824100789
RP11-559M23.1	1.7735526238743375	8.28062530045015	6.902400147531273	2.5081852687912096e-9	5.2262997053437236e-8	10.7602661407814	Up	7.281805689012665
LYNX1	2.2430249331495045	8.912097496506822	6.900149260829897	2.531281282574846e-9	5.269625519929927e-8	10.751209241485704	Up	7.2782202463446835
GTPBP3	1.569695842384515	9.074306417814835	6.899005898201297	2.543094136256735e-9	5.284600430828142e-8	10.746608860885196	Up	7.276987844164814
ALDOB	1.293585965188683	7.376023920985093	6.893331137302179	2.602541194590681e-9	5.3983263817806164e-8	10.723777866657784	Up	7.267740861624396
DNAJA3	1.5139125174614758	10.79119596212815	6.890543372380334	2.632249759425334e-9	5.4550038266206727e-8	10.71256303113482	Up	7.26320494042309
LOC100130417	1.4737169702571835	8.000785798477756	6.874868949122718	2.805685257727015e-9	5.7882121741691963e-8	10.649519692112491	Up	7.237455557652862
TCEANC2	1.3351552018172388	8.524511201340978	6.871803434456335	2.8409119187290214e-9	5.8503351744915655e-8	10.637192622038471	Up	7.232819251821703
AC007365.3	2.775765512926222	7.726649801590509	6.868497774008545	2.879391709633947e-9	5.918922095661733e-8	10.623900832157634	Up	7.2277573761367595
ATP5G1	1.0731332410475964	10.887516564610882	6.866884446519469	2.898359747763393e-9	5.947226248347863e-8	10.617414135777183	Up	7.2256855394660855
MCM4	1.7539952444154974	9.48306552756187	6.865502396683079	2.914707523892449e-9	5.970062080495556e-8	10.61185752498443	Up	7.22402115277742
ECE2	1.515012684810575	7.862673675764639	6.8566488277945785	3.021632807882985e-9	6.156005076719039e-8	10.576265394333149	Up	7.210701030687512
MDH1	1.05191394234153	11.575619981917823	6.849242248332969	3.1140759954130755e-9	6.321822954663332e-8	10.546495840746276	Up	7.19915767092754
KIF18B	1.3522655379752333	8.355832598509942	6.848412125124975	3.124610826866117e-9	6.335505692043819e-8	10.54315961121911	Up	7.19821871456127
ZAN	1.5848316561522688	7.27884126987416	6.848275014381573	3.1263542664965566e-9	6.335505692043819e-8	10.542608575196056	Up	7.19821871456127
ATP13A1	0.8362128279095913	8.866733035790348	6.84405918988775	3.180436056428265e-9	6.439397923453298e-8	10.525666402107156	Up	7.191154736793218
SYNPO2L	2.0007756913396983	8.46752654564824	6.841967655140435	3.207611450588404e-9	6.488677487003724e-8	10.517261747890604	Up	7.18784381146237
GID8	1.996552520791912	10.189719308825426	6.8216974583459065	3.4832552563274022e-9	7.02763642059212e-8	10.435829044667436	Up	7.153190715107171
GOT1	0.8715301423912996	8.41039291498432	6.821261840345313	3.4894307846295282e-9	7.033893120840439e-8	10.434079438056944	Up	7.152804235021334
CMIP	1.4897103669100078	7.75998721630824	6.819849801544542	3.50952352655418e-9	7.068168025002916e-8	10.428408281102922	Up	7.150693134962638
CTA-268H5.14	0.9521454511964036	5.819575636201889	6.818392458471853	3.530381686400506e-9	7.097680369345973e-8	10.422555369325632	Up	7.148883562181276
KIAA0101	2.3712047682913706	10.140010085561816	6.8122383711544146	3.619830949276176e-9	7.264746691972776e-8	10.397841867248443	Up	7.138779524132147
ARHGAP8	1.1674794460494216	8.917788141521257	6.805995834921986	3.7128702493381413e-9	7.438420178161765e-8	10.372776907789948	Up	7.128519293051123
SDF4	0.8634626561654226	10.780769723069293	6.804744469887291	3.731805098365924e-9	7.469813547289063e-8	10.367752895964266	Up	7.126690238398001
CDCA4	1.002948144326016	8.664456751174503	6.804428635346997	3.736599271872087e-9	7.47278694969762e-8	10.366484899564377	Up	7.126517399369638
LYPD1	2.9954213022818283	9.510944657432969	6.802090673461513	3.7722792292022536e-9	7.531062520498984e-8	10.357098871427471	Up	7.123143747008269
UNC5A	1.2443750035391004	7.5484238296413135	6.793384094379977	3.908159451978172e-9	7.78874391130737e-8	10.322149964211649	Up	7.108532575237955
LOC286382	0.9489894392719024	5.850017721984059	6.789639568231334	3.968086425891597e-9	7.894421681562942e-8	10.307121424641537	Up	7.102679679424573
TMEM203	0.8179389248329265	9.503496152031987	6.7891670608322405	3.9757130646537674e-9	7.902722780730976e-8	10.305225129090754	Up	7.102223252390834
C12orf56	2.010968101788537	6.940313715821825	6.78283630607787	4.079314448603519e-9	8.101617644930548e-8	10.279820288382124	Up	7.091428257155294
ASRGL1	1.6257254438244146	10.77693539108362	6.781576695583178	4.1002458994168006e-9	8.136125406136774e-8	10.274766040883836	Up	7.089582366037443
RGS1	2.6805012630231557	9.48198300200829	6.77775362908621	4.164431993569042e-9	8.249180916092304e-8	10.259426770827734	Up	7.083589171605364
RPUSD2	1.080087812004499	8.194254621864282	6.767731394328386	4.337482360683253e-9	8.540211611882286e-8	10.219221553380226	Up	7.068531368100903
LOC102725072	2.473289644253742	8.49455271113127	6.764664622759451	4.391851240764166e-9	8.624992664158229e-8	10.20692090603348	Up	7.0642412656363645
RP11-727F15.11	1.7781795975632615	6.14562477777139	6.763791766290795	4.407449155491199e-9	8.648201477571452e-8	10.203420101905875	Up	7.0630742011571686
LOC153684	2.272709733236318	8.070695363296856	6.761960871752932	4.440346467603413e-9	8.705285932502013e-8	10.196077102710689	Up	7.060216959541663
ZNF551	2.8280169308438428	7.598404394643338	6.756505595318761	4.539821709635253e-9	8.88507963171471e-8	10.174200148790682	Up	7.051338675516608
TMEM234	2.7812214543627576	8.36757056308664	6.75564762850631	4.555666970936186e-9	8.900862905896586e-8	10.170759773881244	Up	7.0505678880626
PPP1CB	1.1735430247683762	11.545772451270684	6.752423360432968	4.615707480853986e-9	9.002793815384345e-8	10.15783140163579	Up	7.045622696080767
MXRA7	1.4033818979960078	11.472846605008446	6.751961723099275	4.624368016716924e-9	9.008911873717416e-8	10.155980457919242	Up	7.045327661382547
SEMA3F	1.1030060045246248	11.500762473752378	6.751045731726937	4.641600344361513e-9	9.030201894442777e-8	10.15230783762454	Up	7.044302539757121
ZNF544	0.9107450447737424	9.452737679399222	6.747054719669516	4.717430955668433e-9	9.162147948619532e-8	10.13630708476807	Up	7.03800269959876
ZNF316	2.260633704262962	8.262023715264649	6.743496192782712	4.786082906521388e-9	9.284193849900919e-8	10.122041632102132	Up	7.0322558002429
SIPA1L3	1.0636866526235875	8.87312441435626	6.74337768642346	4.7883861807260294e-9	9.284193849900919e-8	10.121566585278693	Up	7.0322558002429
LOC100506827	1.0557800828081012	5.609737745917771	6.740711002256675	4.840508099065713e-9	9.361452645690992e-8	10.110877248701184	Up	7.0286567552087185
GREM1	2.146698183747289	6.238942778132906	6.735870987140877	4.936555048857703e-9	9.531092233148979e-8	10.09147805155915	Up	7.020857327730093
CCNA2	1.5952215605660518	8.467787601875974	6.724127069968516	5.1775594113090565e-9	9.962773908439017e-8	10.044417571355453	Up	7.001619725290853
HIST2H2BE	1.246014595107824	8.565917897965937	6.722311110424302	5.215856531985931e-9	1.0028032066832448e-7	10.037141909668655	Up	6.9987842859597205
FGFBP1	1.159662635459365	7.536059488233483	6.718242028344986	5.302696332954285e-9	1.0186430680240225e-7	10.020840350381594	Up	6.991977965888322
HES6	1.173116760058381	8.334451483489412	6.713755889750954	5.400104290607505e-9	1.0356159770730019e-7	10.00287000885687	Up	6.984801258062275
CCDC96	1.9134850574772937	8.20288024089768	6.695098820705742	5.824666052675732e-9	1.1123750802935566e-7	9.928157520514134	Up	6.953748748873163
LUZP4	1.4927969904904508	8.319122975846547	6.693751701520298	5.85657599952141e-9	1.1175362993582181e-7	9.92276441177231	Up	6.951738361390712
NR2F6	2.1448576282808194	10.661729064075807	6.682971376956488	6.118277813507572e-9	1.1644443732369837e-7	9.879613140557217	Up	6.9338812533493535
M1AP	0.6527024545776623	8.036969782332468	6.679734190977469	6.1991103378116924e-9	1.1779854270663929e-7	9.866657870319688	Up	6.928860082200699
CENPU	2.0671360157220775	8.99287699346705	6.679515180996341	6.204617215267151e-9	1.1780534213120097e-7	9.86578143031324	Up	6.9288350151049665
TRAPPC9	0.7368530045514206	9.665100710038631	6.674615129630907	6.329106175885338e-9	1.2006933681432894e-7	9.84617365075396	Up	6.920567888122589
HEATR1	0.9823244436111443	10.468654313016998	6.672677623376158	6.379012218753151e-9	1.209158413859597e-7	9.838421359829155	Up	6.917516797767685
LOC100506319	1.8547316773817115	7.705134348609442	6.67098477579679	6.422936581034799e-9	1.21647654004549e-7	9.831648328767375	Up	6.914896262094472
SERINC2	1.5692566026864974	8.308138524828443	6.666618104520843	6.537632164593419e-9	1.2344289385339637e-7	9.814178874667675	Up	6.908533905724639
U47924.27	1.3130374355076206	6.656897311736786	6.66444436588368	6.595484860006641e-9	1.239647707134148e-7	9.805483329913724	Up	6.906701718535994
HIST1H4H	1.393716794978193	7.907243014785121	6.6642956279721535	6.599461983869016e-9	1.239647707134148e-7	9.804888357073333	Up	6.906701718535994
SPIB	2.1640210784319054	8.045606504523755	6.654390507183112	6.869754346649031e-9	1.287249055667348e-7	9.765272015385944	Up	6.890337418101319
RP11-334J6.6	1.6790553788372566	8.897529855068305	6.651146327791821	6.9606531345019404e-9	1.303214264028395e-7	9.752299042534982	Up	6.884984175204366
DUOXA1	1.5818912497304511	7.655387973516361	6.640746375483328	7.26018873438436e-9	1.3559661881957538e-7	9.710719238810466	Up	6.867751139719019
C21orf15	1.2313655418338687	7.572919255044094	6.640314964687276	7.272887158974548e-9	1.3572298964941168e-7	9.708994690088122	Up	6.867346582463834
CLDN7	1.5447086088538915	9.475496270376372	6.637363659867338	7.360352024225013e-9	1.371315097412411e-7	9.697197525730758	Up	6.86286274262529
LOC100129447	1.0030194880497092	6.154810169251337	6.635995799624381	7.401243828430573e-9	1.377811696913451e-7	9.691730154428503	Up	6.860810132631189
CPSF1	1.0641143796137715	10.720749368823686	6.635490347811451	7.416411255370313e-9	1.379512789525345e-7	9.689709904994046	Up	6.860274268802385
PRKG2	2.057898384184285	8.039881727958704	6.633193055313953	7.485737970995687e-9	1.3912770027490684e-7	9.680528182935683	Up	6.856586393524361
CTB-43E15.1	1.060572860425537	5.606332852923494	6.6326931540145315	7.500908925095809e-9	1.3929650592310636e-7	9.678530278355575	Up	6.856059777167895
EPT1	1.897822952756532	8.519975371206142	6.630059973403935	7.58132642239112e-9	1.405617238394542e-7	9.66800698599683	Up	6.852132925322011
LOC101928288	2.561574980910181	8.330649500846395	6.628865929804844	7.618074493528074e-9	1.411286852934646e-7	9.663235349700251	Up	6.850384704186772
PBX1	1.2105525850260204	11.236232821211305	6.62683950892511	7.680845665054638e-9	1.4207646664695e-7	9.655137742526922	Up	6.847477852063879
CD200R1	1.1289678662695968	7.46749076198859	6.626813482763385	7.681655196567907e-9	1.4207646664695e-7	9.655033744677862	Up	6.847477852063879
DNAJC2	0.9050240422569864	9.54962764375117	6.620133030276211	7.892277773852728e-9	1.457364190379149e-7	9.628341929401063	Up	6.836431905945987
HMMR	2.0095570928787287	8.849419206215535	6.614993584921557	8.058213860229863e-9	1.485607372346487e-7	9.607810736345044	Up	6.828095954070744
RCCD1	0.8171644885120983	9.387462679399574	6.613759769098333	8.098563280308006e-9	1.491097954903083e-7	9.60288231251975	Up	6.8264938254427
SPAG1	1.2793144497459314	7.89602858776975	6.613403847181653	8.110240258820782e-9	1.491593142134732e-7	9.601460630761345	Up	6.826349622052411
SLC12A7	1.1780866586732497	10.895141870682243	6.607125096910911	8.319005284367671e-9	1.525084310104551e-7	9.576383444087604	Up	6.816706146873874
MAS1	2.2586255775725617	8.9435777074512135	6.605602356272922	8.370435205680762e-9	1.5332841238652532e-7	9.5703023466259	Up	6.814377361131603
CENPF	2.323214065880002	10.00513011306039	6.596313026610467	8.691094548615544e-9	1.586939761993416e-7	9.533211107925798	Up	6.799439558141416
AF086288	1.2448550323538266	6.79961896243969	6.593998265593755	8.772880277395698e-9	1.600595916001086e-7	9.523970113666408	Up	6.795718295564299
CIAO1	0.761682228685272	8.848782533594315	6.591815642363722	8.85069784266172e-9	1.6122222606867638e-7	9.515257221265117	Up	6.792575086640152
CDC25A	1.5043169959093854	7.835819098844249	6.591031217036548	8.878832414645058e-9	1.6160605156297878e-7	9.512125983495334	Up	6.791542380497074
BCL9L	2.56929869730957	11.517463641667534	6.583862498967498	9.14010246871143e-9	1.660972234961468e-7	9.48351357053808	Up	6.779637627213751
LOC100505918	1.57443995082936	8.440694077115115	6.580519807331232	9.264528152291633e-9	1.6795811378469118e-7	9.470174024257496	Up	6.774799011251888
DKK1	2.404068942005467	8.681070757104147	6.57424955548802	9.502485105954093e-9	1.7199949109107884e-7	9.44515519364048	Up	6.764472838073051
FRS3	1.7958497060235636	8.278998758185779	6.565041483274492	9.862984338619976e-9	1.7810198791103907e-7	9.40842280432566	Up	6.749331233069173
RAD51AP1	2.0624437363807333	9.11771273656119	6.5635760369047915	9.921597511452238e-9	1.790191084105014e-7	9.402577865078412	Up	6.747100610169132
CLSTN2	2.1137629953893997	7.9750388831366275	6.562396542218067	9.969024853670985e-9	1.7959159025758934e-7	9.397873634974523	Up	6.745714003917239
RPL13AP17	1.1236864172516672	10.49827830361483	6.560752785755687	1.0035496102619336e-8	1.8063300968637936e-7	9.391318051780026	Up	6.743202881848324
RAP1GAP	1.2508373693353878	9.036919297516148	6.55809734743757	1.0143810086366204e-8	1.823096865404339e-7	9.380728403315317	Up	6.739190255649476
RMI2	1.5026617073977784	8.7619064560622	6.541986469198778	1.0826321155735304e-8	1.9396664191234768e-7	9.31649820905287	Up	6.712272952951573
PEA15	1.1346613662873963	11.3344373296649	6.533925645653632	1.1184739548412124e-8	1.9991848135009457e-7	9.284373681717462	Up	6.6991470559201165
CKB	1.1579143915884602	8.910761540949261	6.5334754753559485	1.1205100040647722e-8	2.0012606075720474e-7	9.282579871595274	Up	6.69869635311247
SNHG17	1.5822101349712394	11.789099080769647	6.531388745527543	1.1299961578647556e-8	2.0150570612461218e-7	9.274265132882388	Up	6.695712651243246
CDC45	1.317367700272615	7.251717270556376	6.52037744151475	1.181390108414366e-8	2.103426014818077e-7	9.23039876107935	Up	6.6770727591028125
RASAL1	1.5971913049694413	8.779664194884885	6.519425658889923	1.1859399940340783e-8	2.1098850018278137e-7	9.226607805257416	Up	6.675741215049532
KLHL17	1.2235542379697186	7.142148620508226	6.516346792455818	1.200777733916452e-8	2.132965355145536e-7	9.21434544564072	Up	6.671016198554938
S100A13	2.116696861601877	10.102925782524377	6.515423312690242	1.2052640371963413e-8	2.139273538170294e-7	9.210667689012002	Up	6.669733680822257
HMGCS2	2.370922822787909	7.733455016899234	6.513205281177072	1.2161074713962218e-8	2.1568467316336554e-7	9.201834823558084	Up	6.6661807153382275
ZNF705G	0.696290024377447	7.561946644862027	6.5115550154766195	1.2242380609052882e-8	2.1695850190125546e-7	9.195263376419366	Up	6.663623326606653
LOC100506258	2.13605711369551	7.989954423453685	6.510837288358303	1.2277910144165225e-8	2.1741974163185461e-7	9.192405456208183	Up	6.6627010246815415
CBS	2.069417188668556	10.146684605939956	6.508351827796235	1.2401740949191549e-8	2.1927313073922215e-7	9.182509098078889	Up	6.659014582579737
LOC101929459	1.6415784337474657	5.611533119213671	6.501473195026208	1.2750954602992648e-8	2.2509960676070126e-7	9.155124554115265	Up	6.647625263692535
DCAF12L1	2.925163645118955	7.721435556208879	6.49893897059649	1.2882059513541898e-8	2.272387352431188e-7	9.145037072459496	Up	6.643517636568089
BACE2	2.0785134305711583	9.490167621083824	6.496636241682379	1.3002349046413458e-8	2.2918393207464829e-7	9.135871773779437	Up	6.639815833720045
SLC26A7	3.8131484151472335	6.346550847816562	6.493892177912909	1.3147150750232669e-8	2.315578614430895e-7	9.124950769314278	Up	6.63534047002143
NDUFA9	1.0518064179892974	10.949477743344383	6.492243284969079	1.3234930595611733e-8	2.329245977669237e-7	9.118388864126686	Up	6.632784645813298
WIPI2	0.9843646683451936	10.628081513302934	6.491626292427584	1.3267926044283481e-8	2.3332581088944021e-7	9.115933581742729	Up	6.63203721617056
ZNF492	2.019377852754886	6.536829101373282	6.4907637526714534	1.3314189837572289e-8	2.3395956166959787e-7	9.112501242336675	Up	6.630859200971962
PGP	2.2637996135813756	9.259498283124216	6.488643984399563	1.3428569154393776e-8	2.357883604630662e-7	9.104066371266786	Up	6.627477637372516
GAPDHP73	1.2367462644138758	8.739309071850613	6.472932973688341	1.4307290012055583e-8	2.506404963137976e-7	9.041568143924357	Up	6.600948758143387
OVOL1	0.9512113309395138	8.094554640160837	6.46850053337948	1.4565366954327464e-8	2.549663584912457e-7	9.02394178295561	Up	6.593517118724677
CHD7	1.582995945053037	8.938787142698656	6.467954360087463	1.4597485931714524e-8	2.5533324207316253e-7	9.021770009749789	Up	6.592892640310802
WBSCR22	1.0800422213539471	8.933702637772427	6.458952983518817	1.5137079870681648e-8	2.639643676534493e-7	8.9859831073068	Up	6.578454694251047
HDGF	1.0463842568776478	11.757486322715224	6.457493396876932	1.5226423135441458e-8	2.649166044986807e-7	8.980181218482091	Up	6.576890820048736
MCM2	2.112456178831657	9.90703802824617	6.452932176982991	1.5509010718095216e-8	2.692190107885436e-7	8.962052095087852	Up	6.569894275840901
LOC102723886	1.1468017369922423	8.035105351570415	6.451382361730677	1.560620917132191e-8	2.707008791741274e-7	8.955892796650428	Up	6.567510333738721
MARVELD3	1.488555317237707	7.917877048713326	6.450737411011225	1.564683603298315e-8	2.7093871037705057e-7	8.953329718526408	Up	6.567128940695507
TTLL2	0.672600483022209	6.3780948629930005	6.444182105533768	1.6065774774964152e-8	2.772012526971379e-7	8.92728164473419	Up	6.5572048114403705
KDM8	2.3440247241382215	8.639494094658119	6.441165815859096	1.6262264356054983e-8	2.802956923029448e-7	8.915298092978677	Up	6.552383576600885
SRD5A1	1.6265562764104544	9.22689763004957	6.441053575222935	1.6269621896862216e-8	2.802956923029448e-7	8.91485219076321	Up	6.552383576600885
PRAME	2.777559376472671	7.970588876418682	6.43898851306045	1.6405581190076897e-8	2.822130015396762e-7	8.90664855043179	Up	6.549422982194468
OR5L2	0.6313429436584252	7.19555309042865	6.43651826278225	1.656969987386054e-8	2.8460823079133285e-7	8.89683602018502	Up	6.545752544393797
CALN1	2.654155409024926	8.520762679391119	6.4323555460723485	1.6849959171101812e-8	2.887716972851224e-7	8.880302402295122	Up	6.5394453745208
ST6GALNAC1	3.401826237898682	8.349887078972566	6.432051406718738	1.6870619221557035e-8	2.889093541691643e-7	8.879094503388277	Up	6.539238396548728
VAC14-AS1	1.4198207293866971	5.104799889100185	6.429314699516537	1.7057657608534614e-8	2.918939030857618e-7	8.868226150105063	Up	6.534774976213985
OFCC1	0.5129200342621747	7.636114537696762	6.427927974865031	1.7153216869106683e-8	2.933097524277218e-7	8.862719404406953	Up	6.532673496667825
BC040833	1.5476039137979054	6.4969237382025495	6.426904154185314	1.7224109311423542e-8	2.943020141419412e-7	8.858653934480564	Up	6.531206765668864
BNIP1	1.357264918373934	7.8097977493141055	6.42390514005029	1.743344861901879e-8	2.974346539556532e-7	8.846746028389326	Up	6.526608433443697
PRKRIR	0.9155622214701769	10.939677452635836	6.422128028248917	1.7558685784900762e-8	2.991252212008522e-7	8.839690395058927	Up	6.524146967220883
HIST1H2AL	1.8004992114433946	5.0920134483705555	6.421529082362033	1.7601095821729298e-8	2.996246066260004e-7	8.83731250876231	Up	6.5234225231385805
AF186192.1	2.5553362351250213	8.738302274971439	6.416853235330224	1.7935697322074165e-8	3.050935457485017e-7	8.818750528771634	Up	6.515566979756674
LRCH4	2.1994747090511417	9.860684678461476	6.413244502860023	1.819824777983025e-8	3.091000081326921e-7	8.804426786020862	Up	6.509900983510026
LOC101927722	1.2411475591860626	7.418096191480225	6.410127187126429	1.8428114983120875e-8	3.125402836907506e-7	8.792055012095986	Up	6.505093997977248
SLC7A5	1.2042502315547845	8.585435161668496	6.40423174444008	1.8870747132098927e-8	3.198102397298455e-7	8.768661280066379	Up	6.495107635064537
PFKP	2.0525830039030986	9.98402855147875	6.403099577098296	1.8956950991000765e-8	3.207959184342503e-7	8.764169272630323	Up	6.493771165988744
C21orf119	1.2410091989232672	8.382974266445148	6.401896504958554	1.9048982034404283e-8	3.221150480156212e-7	8.759396136948467	Up	6.491988986085326
MTHFD2	2.0736266767965823	10.604701498003578	6.395723043449691	1.9528254844850348e-8	3.299755853732135e-7	8.73490636679253	Up	6.4815181920310225
PRR34	1.698647661967553	8.301150194466612	6.394283214973766	1.9641745449952898e-8	3.316483351656622e-7	8.72919541317188	Up	6.479322178465653
PWWP2B	1.418770522264837	9.064060756027686	6.389037364728565	2.006080157026492e-8	3.3797575782480937e-7	8.708390659768764	Up	6.471114449487104
FAF1	1.0242435169670614	10.31023153590922	6.386674042526148	2.0252479939270443e-8	3.407033003901239e-7	8.699019114404596	Up	6.467623659404602
SLC44A4	1.292919511303884	8.18234405836303	6.378718973839766	2.0911136850593812e-8	3.515252755361762e-7	8.667479769212047	Up	6.454043442674765
CSNK1G2-AS1	1.1810960371065775	7.6285277162454	6.376998591493451	2.1056352218436893e-8	3.537065215900277e-7	8.660660169460954	Up	6.451356932652166
ZNF717	1.1504877125565862	8.464238693247683	6.371747640386169	2.1505797159338096e-8	3.6046236865091306e-7	8.639847981019916	Up	6.443140067810886
CSE1L	1.004054114683516	11.47449140247095	6.369058232966493	2.1739665999534063e-8	3.638491722043451e-7	8.62919000957912	Up	6.43907860880765
IPCEF1	1.590633201714157	8.298673585339078	6.365348821860019	2.2066380674993712e-8	3.687777381031272e-7	8.614491512008424	Up	6.433235303753934
GPSM2	1.7738019717954474	8.27255704741385	6.361202260013197	2.2437369573399817e-8	3.74704071875777e-7	8.598063137614055	Up	6.426311587441104
CLDN19	1.5439751552006555	9.8624027420338	6.35451735724203	2.3048537850880672e-8	3.843494879666902e-7	8.571583235979386	Up	6.415273693164739
ANKS6	1.380948112274611	9.638892573635626	6.350892965736611	2.3386776093928156e-8	3.892139413945258e-7	8.557229168197637	Up	6.40981161197441
MTFR2	1.9828168249598008	7.602454992795525	6.350845021371529	2.339128324740911e-8	3.892139413945258e-7	8.557039301678056	Up	6.40981161197441
SPDL1	0.8235908797188847	8.530149902376388	6.3503238463322464	2.344033351741265e-8	3.8974665010529364e-7	8.554975395670159	Up	6.409217608908943
LOC100289361	1.991520422659641	8.285023135505991	6.348912428733725	2.357368188009031e-8	3.916792067789297e-7	8.54938623606484	Up	6.407069483394353
LINC00572	0.9334048762094236	6.326088466100658	6.348160396448078	2.3645039768941777e-8	3.925797277747597e-7	8.54640833474566	Up	6.406072130469251
VSX1	1.3652577000063246	7.046656852728936	6.336946577356945	2.4734865183855082e-8	4.100770719680194e-7	8.502013537762757	Up	6.387134512097872
CMTM8	1.49526314236937	7.990553452214048	6.336767429328611	2.4752674347123332e-8	4.100770719680194e-7	8.501304450744385	Up	6.387134512097872
PPIH	1.1844684983062272	10.850628069039802	6.334954223091878	2.4933643418861322e-08	4.124778219668316e-7	8.494127850890113	Up	6.384599397553718
ATP6V1B1	1.9484790520892783	9.079691093893071	6.333276962631916	2.510221292118224e-8	4.1496642299402345e-7	8.487489747327306	Up	6.3819870428020335
RP11-764E7.1	1.986659179862812	6.200924891305686	6.33240932177373	2.518985662821879e-8	4.161146063516373e-7	8.48405604168736	Up	6.380787039442375
DGAT1	1.1224002338853083	9.09992480052378	6.3318137288424055	2.5250195428838756e-8	4.168104049180389e-7	8.48169903489255	Up	6.380061448196808
JAG2	1.1004460901231905	9.195253589863755	6.329321468292296	2.550424287846873e-8	4.20564921560221e-7	8.47183669682773	Up	6.376166953732783
MAL	3.065328298018037	9.060670393802484	6.329222272097713	2.5514406710327666e-8	4.20564921560221e-7	8.471444177926347	Up	6.376166953732783
CLDN18	0.9843661745748148	6.794655323425499	6.318180634526201	2.6671241772553742e-8	4.384361674051846e-7	8.427761529022405	Up	6.358093627296004
TK1	1.818730422942843	8.243468376350767	6.318143168435551	2.6675254382972025e-8	4.384361674051846e-7	8.427613337281596	Up	6.358093627296004
IBSP	1.3940692194529856	6.367581182613505	6.315193326663741	2.6993069101448396e-8	4.43341297898089e-7	8.41594631510625	Up	6.35326181164253
THRSP	1.8920087558988703	8.20039672541811	6.314730274751694	2.7043298123413675e-8	4.438476454559408e-7	8.414114999588026	Up	6.352766079643558
RNF165	1.3746019825831608	7.092377395647421	6.311677626131665	2.7376759347773322e-8	4.4899847822057764e-7	8.40204293317268	Up	6.347755130937714
RNF25	1.1200888119442718	7.1813891888854355	6.308948714113641	2.76783082983962e-8	4.529405643610251e-7	8.391252296587606	Up	6.343958783116409
TMEM161A	0.9621519453579666	10.29066147090976	6.308786749947223	2.7696308822110853e-8	4.529405643610251e-7	8.390611894408426	Up	6.343958783116409
FAM189B	0.8043994328981938	10.229439434453983	6.30838828114649	2.7740643668282223e-8	4.5334156177616356e-7	8.389036375605244	Up	6.343574463551906
CCNB1	1.9225775096245623	8.839343162183948	6.307054948387766	2.7889506908357413e-8	4.554489854077868e-7	8.383764640039672	Up	6.341560261054656
LRFN4	1.1496655368873698	8.225847307254869	6.303462073095759	2.8294599112853132e-8	4.607488491836062e-7	8.369560440568907	Up	6.336535740848626
JAG1	1.0073256316438002	10.351832719962925	6.299686597166585	2.87265699617455e-8	4.674503514614334e-7	8.354636425302967	Up	6.3302645093505285
TTC39A	2.0922058805986588	7.163799193734798	6.29034137403827	2.9824146801625665e-8	4.842772566887109e-7	8.317705074009364	Up	6.314905926424295
SLC25A33	1.560802029451163	8.895052038895665	6.282335435657744	3.079744318244009e-8	4.993725744656604e-7	8.286076942103861	Up	6.301575312776201
MFN1	0.9818190444887592	9.619791344785256	6.281880532349884	3.0853682951177856e-8	4.999301786402254e-7	8.284280100744347	Up	6.301090645961304
SCUBE3	1.5840403736880715	8.438535098186728	6.281193837904552	3.093877210865097e-8	5.009541168250711e-7	8.281567757682705	Up	6.300202050025408
IDH2	2.1934510738528292	10.557210386450022	6.2759161565271855	3.160055213312979e-8	5.113076607170272e-7	8.260724085127187	Up	6.291317700365173
SYNM	1.1842271336812775	7.988200471859945	6.274856469446339	3.173511155440597e-8	5.127596167042756e-7	8.256539470415646	Up	6.290086185776882
ABHD11	1.1936219164267765	9.37621149545471	6.27406247471378	3.183630557258925e-8	5.14031640928207e-7	8.253404164956176	Up	6.289010147429647
AF086102	1.6372098699266102	7.782266408523263	6.267972158468096	3.2623228774676965e-8	5.256245430534045e-7	8.22935809949621	Up	6.279324364407541
GABRB3	2.218301904454134	8.405188693132766	6.264255605357947	3.311288759975292e-8	5.322760654618106e-7	8.214687036212435	Up	6.2738630620473534
POLE	0.6957387802983606	7.391236250429363	6.263786309037083	3.317523382110157e-8	5.326429295389354e-7	8.212834644183161	Up	6.273563833558887
C19orf60	0.9822524641571988	10.005572344098942	6.259340872984448	3.3771616923828286e-8	5.4183788471267e-7	8.195289442871797	Up	6.266130632845753
SCMH1	1.1784645584293596	8.076199153282992	6.2514135410801845	3.486162227933708e-8	5.585427563928243e-7	8.164009529985215	Up	6.252943576076162
ACSM2A	1.6035148144134492	6.8992659984233216	6.2496385729302055	3.511042039079984e-8	5.62135275102246e-7	8.157007144321241	Up	6.250159161012754
G6PC3	1.707994608846489	10.074846634199847	6.247640843439761	3.5392549783478725e-8	5.662560465008459e-7	8.149126535702933	Up	6.24698714754347
MAP3K10	0.6278937630443293	7.349356213587639	6.245811034735703	3.5652936677746466e-8	5.700234369323279e-7	8.14190888490717	Up	6.24410728762377
WNT7A	1.1098173659814234	7.7889927731375534	6.238767949804758	3.6673037175297944e-8	5.834787326381375e-7	8.11413244262252	Up	6.233974969038024
SAG	0.7031694120206478	7.549577449756104	6.238436328454541	3.672177528892467e-8	5.838481562441331e-7	8.112824789804666	Up	6.233700086928389
CSRNP2	1.3114835833436107	8.973074524474859	6.236186758762397	3.7054092596305185e-8	5.883140766903999e-7	8.103954719436295	Up	6.230390760050723
OR7E104P	1.2141131486697443	12.11932635028916	6.2350749917080215	3.721942755230014e-8	5.905293224473474e-7	8.099571307660824	Up	6.228758532833008
HMGB3P1	1.1171107934742626	8.222806349716972	6.234254369677378	3.7341934323027876e-8	5.920624500184024e-7	8.096335930839818	Up	6.227632482013643
OR4D1	1.1563411847629217	7.419388221216998	6.232811244781654	3.7558342197875646e-8	5.950812404052611e-7	8.090646537608006	Up	6.225423740403823
SASS6	1.3547284024758168	8.01308911338292	6.231216736804319	3.7798897481659485e-8	5.984781837251816e-7	8.084360712178569	Up	6.222951676269195
DLG3	0.9246431792033968	7.983231315983015	6.230777007811084	3.7865505481792526e-8	5.991181880483618e-7	8.08262729531939	Up	6.2224874958842795
MT1E	1.4494809557226611	11.35599849537181	6.229975335927946	3.7987238466276786e-8	6.006289073047315e-7	8.079467174008723	Up	6.221393769738073
ME3	1.2140992868146157	8.592302509497225	6.22810368308152	3.8272959541034663e-8	6.043112776668957e-7	8.072089676019313	Up	6.21873930086523
INHBB	2.7427061631996104	8.129553185193316	6.226836154200583	3.84676659684738e-8	6.069667101329049e-7	8.067093769838564	Up	6.216835127709007
OR7E156P	1.015784597431051	7.815118485761152	6.222266886992641	3.9177742712401255e-8	6.173192668850058e-7	8.049086331390232	Up	6.209490168243869
TPBGL	1.0705475037792072	7.130966811557606	6.2205671508666525	3.9445189811323776e-8	6.206784715909742e-7	8.042388534474892	Up	6.207133317980786
AURKB	2.3386688771800905	8.18124326973487	6.218944347680412	3.9702220690088566e-8	6.242935444457293e-7	8.03599432057759	Up	6.20461115590019
LOC642533	2.202574787266107	9.854204479622894	6.217981699158152	3.985547565199842e-8	6.262729584080164e-7	8.032201464708507	Up	6.203236340123252
PCAT19	0.9926849035560652	6.912875578380197	6.210427793454294	4.1078603531423815e-8	6.446072497911149e-7	8.002444054810383	Up	6.190704814358015
KLK8	2.4277520540804103	9.207945444692896	6.210059563970919	4.1139169296441666e-8	6.451151846012946e-7	8.00099370694889	Up	6.190362735642859
ABHD17C	1.4802706295837051	8.183341136171123	6.206877736861292	4.166621200655398e-8	6.515934822268958e-7	7.988462330813971	Up	6.186023268511856
DGKD	0.6193544559331343	8.239394561505566	6.204790766438662	4.201553056469365e-8	6.566074616049357e-7	7.98024384585758	Up	6.182694186310552
CEP72	0.9239134130797816	7.645230170535403	6.2038611892533115	4.217205697228325e-8	6.58154496227059e-7	7.976583398736499	Up	6.181672147445226
MPZL2	1.5481292240288944	9.578037397387137	6.200409851835181	4.2758283060588074e-8	6.668485058917481e-7	7.962994097312095	Up	6.175972817549861
DPF1	0.8199370534443977	8.55429168210306	6.196406766692288	4.3448351219900357e-8	6.766881058952349e-7	7.947234754994333	Up	6.1696114570165514
PLEKHB1	2.5207021584936564	7.839592826981716	6.195402808593715	4.362314220937514e-8	6.78948211298159e-7	7.943282780623657	Up	6.168163351500376
LINC00520	1.2808897279568416	12.28642464851342	6.191322429986133	4.4340746308790663e-8	6.896478142752015e-7	7.927222487393016	Up	6.161372635878226
C18orf54	1.8079087253086996	8.708078180914056	6.189758873118227	4.4618814866122745e-8	6.935012672024607e-7	7.921069074317907	Up	6.158952741023958
WDR27	1.388450608673554	8.416846240596964	6.187577516515475	4.50096453753688e-8	6.983413615104729e-7	7.912484961761986	Up	6.155932234711395
FAM212B	2.430598970452606	8.404288953712145	6.187510040563618	4.5021788899337724e-8	6.983413615104729e-7	7.912219441586967	Up	6.155932234711395
MKI67	1.5605422655165793	8.526221583328208	6.180722282704043	4.6260111488862065e-8	7.162326060357611e-7	7.885513183337388	Up	6.144945911892845
KIF23	1.9185188552574095	6.898153385887386	6.179049667817259	4.6570403109115035e-8	7.204085549245725e-7	7.878933481405249	Up	6.142421138530913
AURKA	1.5516867015208735	9.570299754388271	6.178694289822813	4.6636595556726324e-8	7.209450471232036e-7	7.877535561043568	Up	6.142097837417461
PBK	2.368577034744786	8.269396951996832	6.176764886979469	4.699759556537716e-8	7.260351039434599e-7	7.869946394147651	Up	6.139042380566612
SIX4	1.4491176420859189	9.106274959999068	6.1700791777577155	4.8270082078566946e-8	7.441854500508983e-7	7.843653377796218	Up	6.128318825344287
USP18	1.723226176902278	8.302820055841192	6.16688923179785	4.8889197692908866e-8	7.527159852059636e-7	7.831110815352091	Up	6.123368860884784
KRT78	0.7503867088331964	6.580151470839554	6.16552150170941	4.9157056050068216e-8	7.563310594280501e-7	7.825733547086876	Up	6.1212880645368
TMEM69	0.7938440793416692	10.391642638772636	6.165113722135144	4.923719732975396e-8	7.570549984593016e-7	7.8241304104930895	Up	6.120872568769742
SLIT3	1.3356516309146578	9.121134584898956	6.1647161966956725	4.9315447999891e-8	7.577489152380835e-7	7.822567613328244	Up	6.120474676677861
FKBPL	1.1151169700669206	8.28679740960112	6.159653849100038	5.0322787559231985e-8	7.716722899247109e-7	7.8026682307371	Up	6.112567094604082
BOLA2	0.754974784666695	11.26902259742906	6.155400808826583	5.1184828942506626e-8	7.843655066146075e-7	7.785953417172878	Up	6.105481513189263
FAM21EP	1.880146393496104	7.806657545388482	6.145683528769843	5.320971010728933e-8	8.143043194278745e-7	7.7477750120598605	Up	6.089213261512314
IL1B	1.529987992860077	10.229576398023262	6.145416185524986	5.326652670741729e-8	8.146289201463905e-7	7.746724865862128	Up	6.08904017608522
AV4S1	2.3012372059732797	7.687317472376091	6.144821962740032	5.339302814989946e-8	8.160180968881428e-7	7.744390753030401	Up	6.088300209761445
FAM83H	1.334505052769332	9.532331146908112	6.143976398346122	5.35735499635918e-8	8.18230473709624e-7	7.741069470264825	Up	6.087124349920169
PIPOX	1.5575829442415603	8.160751868786761	6.1399356391801705	5.444460824879908e-8	8.304254614161827e-7	7.725199480032463	Up	6.080699343523762
TMEM86A	1.843837182431268	8.165247375284833	6.139660525822008	5.45044215703024e-8	8.307839181258819e-7	7.724119078591387	Up	6.080511918897635
FUT1	0.8434212324635855	7.97897006571906	6.136227214428064	5.525636867343703e-8	8.416847262846643e-7	7.710637149138319	Up	6.074850553720471
SLC25A5-AS1	0.7647088294371285	6.679371509780182	6.13331083654733	5.590316733044085e-8	8.50970436030044e-7	7.699186680181563	Up	6.070085527685146
TRPV5	1.7508362795340604	7.974821855632397	6.12755124505671	5.72026552640181e-8	8.701725729956582e-7	7.676577241187286	Up	6.060394609372832
ST3GAL6	1.2437393943941863	7.930455769236918	6.125960540668007	5.7566797142305214e-8	8.749554056925904e-7	7.670333879881988	Up	6.058014081326452
EPB41L4B	1.6132721289312286	10.42525844375968	6.1144373164823085	6.02741532173689e-8	9.120452059921846e-7	7.625119235401045	Up	6.039983635107555
DIAPH1	0.9646485107982185	10.101758809391187	6.110167138105625	6.130913874050804e-8	9.264807035958276e-7	7.608369757006602	Up	6.0331636215788915
C6orf106	0.9671503909180554	9.257156908217024	6.109121126896779	6.156533890718526e-8	9.296591168925208e-7	7.604267329047279	Up	6.031676267350599
RGL3	1.0546402315572383	9.964411948470929	6.108976950360954	6.160073522483768e-8	9.296591168925208e-7	7.6037018873155136	Up	6.031676267350599
AFP	1.1727707101505347	6.115777977465559	6.108310994768885	6.17644936505297e-8	9.315160515691952e-7	7.601090142085924	Up	6.030809657087797
LOC150051	3.0424378322809167	8.914190554510693	6.107689203861519	6.191778127027954e-8	9.33212725746196e-7	7.598651670984588	Up	6.030019347585456
LOC101928274	0.8464627437135341	8.3937028518812	6.103502432591389	6.295978715987405e-8	9.45802344340616e-7	7.582234190301727	Up	6.024199613842551
ALMS1P	0.8652289970167804	6.682412244475461	6.103073610004134	6.306748854836896e-8	9.46798602689064e-7	7.580552830148394	Up	6.023742391686001
TOP2A	2.069514984905174	9.72681794860504	6.100306015503318	6.37669900598733e-8	9.56672108576945e-7	7.56970220135205	Up	6.0192368875485105
RP11-678G15.1	1.1954462477311214	5.88953730550154	6.090451491497828	6.63206701170511e-8	9.930305049790654e-7	7.531077362470092	Up	6.003037410174718
HMGCL	1.1652677029430478	10.89615233344259	6.086448872601968	6.738659669765724e-8	1.0067211047112658e-6	7.515393918936998	Up	5.997090826825614
GMNN	1.0728240880485256	10.064670466020871	6.0863578973938255	6.74110202551536e-8	1.0067211047112658e-6	7.515037483752734	Up	5.997090826825614
DQ599616	0.8332562143883031	6.684786619030715	6.083238008509195	6.825392489881166e-8	1.01864419292884e-6	7.502814831273645	Up	5.991977486289825
Dbpht2	1.5538091044547515	4.935498241305892	6.082953859041908	6.833121066174393e-8	1.0191328348957232e-6	7.501701716090726	Up	5.99176920588327
RFC3	1.3833406799584154	9.941594603728396	6.079314938814348	6.93286562404709e-8	1.0333357173457548e-6	7.487448016178363	Up	5.985758558921927
PART1	1.9581905442817105	8.6297557289349	6.076078252837966	7.022795737146189e-8	1.0460582270193206e-6	7.474771830177521	Up	5.980444140545821
DCTPP1	1.0392874763629028	11.239319720729087	6.073809431775787	7.086521919898173e-8	1.054863597952832e-6	7.46588729967453	Up	5.97680369438169
ISCA1	0.8805747635861945	9.854771626294248	6.072700439894367	7.11787911353871e-8	1.0588423682617174e-6	7.46154490249624	Up	5.975168689268938
MYNN	0.8363969569500984	9.065628371473116	6.072359174883774	7.12755614131511e-8	1.059592962684525e-6	7.460208680142906	Up	5.974860934743839
DPP3	1.1464662408389383	9.343753742919322	6.072097008048062	7.134999082911096e-8	1.0600106754410584e-6	7.4591821804870255	Up	5.974689760903345
BC039122	2.1159994537775564	7.86253786438242	6.071301910523343	7.15761908342214e-8	1.0619920039534055e-6	7.456069094674741	Up	5.973878753171674
MYB	2.096434347610055	8.270244509942343	6.068015126732787	7.25188196952647e-8	1.074584245989612e-6	7.443201369757458	Up	5.968759530722408
BAIAP2L1	1.1760263076886908	9.718194373268682	6.062707171998419	7.40671322773661e-8	1.0953987843399217e-6	7.4224248260080765	Up	5.960427745381633
CNNM2	1.7722059686950675	8.420331063788812	6.062239338434458	7.420515743097777e-8	1.0967311349246384e-6	7.420593858948128	Up	5.959899827238581
DPH2	0.8675247426593593	8.880013466732922	6.0608312652915375	7.462212081317241e-8	1.1010481392496945e-6	7.41508329754975	Up	5.958193692696308
DNAH14	1.2638291576033325	7.048152355630555	6.060765602075722	7.46416217481654e-8	1.1010481392496945e-6	7.414826330038067	Up	5.958193692696308
ST14	1.3681067003053915	8.896802448603584	6.057201073581499	7.57078378023132e-8	1.115429423281108e-6	7.400877998733729	Up	5.952557903685155
KRT23	1.7046137021809369	9.114791245956289	6.057180430279697	7.571405631170773e-8	1.115429423281108e-6	7.40079722617675	Up	5.952557903685155
DCDC2	2.501543719191253	8.019156806492846	6.053271624747119	7.690069156776588e-8	1.1314539693755082e-6	7.385504329221564	Up	5.9463631096304645
SEC61A2	1.1507723070400535	7.783114911484452	6.050413031144056	7.778014470638215e-8	1.1426513908397471e-6	7.37432203572549	Up	5.9420862474063805
RPS6KB2	1.4218829531537338	8.233179806641264	6.050311485016998	7.781156811610326e-8	1.1426513908397471e-6	7.373924832855201	Up	5.9420862474063805
RAB30-AS1	1.2318620308573784	10.398056393285218	6.0483819134044765	7.841106795115892e-8	1.15071637181178e-6	7.36637756643504	Up	5.939031707939509
TMEM51-AS1	1.658125579879501	7.79328118644473	6.047733647244515	7.861350280105671e-8	1.1529476478111388e-6	7.363842108359512	Up	5.938190412378264
ATP6V0E2	1.4055743066166675	9.897495812401164	6.045503482355024	7.931387962490422e-8	1.1624742164882664e-6	7.355120203811192	Up	5.934616670920632
CNBD1	2.63381124439306	7.29171631590636	6.041517926463747	8.058095300686094e-8	1.1795339883838588e-6	7.339535407738139	Up	5.928289540361355
CNTNAP3P2	1.1091248885883465	5.624737895547797	6.039315808331095	8.128961756312546e-8	1.1891465218841091e-6	7.330925651559663	Up	5.9247646300530965
ADAL	1.7448628089755571	8.496987957625224	6.038499215428197	8.155397113255731e-8	1.192052431507056e-6	7.327733190911894	Up	5.923704642067754
CLEC1A	1.864871406573429	7.884838901091407	6.036427577313052	8.222844231101848e-8	1.2005772378007605e-6	7.319634686367325	Up	5.920609894855904
LOC101927703	0.859170133151105	7.617925771237901	6.035973631806762	8.237697118124624e-8	1.2019787778416664e-6	7.317860213892288	Up	5.920103200176559
RAB3IP	1.6760815554719333	8.246382024323937	6.032099264883399	8.365550259634236e-8	1.2198561146601125e-6	7.302716837646771	Up	5.913691392517339
GALNT6	1.6149130819493849	7.447606120373187	6.030823417274895	8.408081410712964e-8	1.2252770356414131e-6	7.297730647448419	Up	5.911765706036029
DNAJC5B	0.6823451485417484	7.733575374023622	6.027902159733099	8.506271250075015e-8	1.238796816871205e-6	7.2863150805158	Up	5.906999919247642
PFKFB1	1.4264699023881908	7.427859314425336	6.027701093224025	8.513071140400747e-8	1.2389984390663403e-6	7.285529418420233	Up	5.906929240763002
MAPKAPK2	1.411360178110474	8.699548919298186	6.027233565184092	8.528903335257879e-8	1.2397254091954576e-6	7.283702593366386	Up	5.9066744974806005
PNPT1	0.9673352461973828	9.611529739581767	6.02661962331506	8.54973791491927e-8	1.2419647857488125e-6	7.281303729519567	Up	5.905890717824321
DIS3L2	2.3859683719983034	9.057150594418165	6.025610587128463	8.584089833774275e-8	1.245373438851754e-6	7.277361257233612	Up	5.90470040108702
KRTAP1-5	1.4308445333852928	7.554484356474007	6.020065968257726	8.77530518386966e-8	1.2715022628356803e-6	7.255700825412512	Up	5.895682862593128
PIGC	0.9555611071783652	11.281626420572984	6.018373810116175	8.834497511178487e-8	1.2783042452013403e-6	7.249091414000739	Up	5.893365768801503
MCCC2	0.9941776595370372	10.54078550372319	6.018185104774426	8.841122943189378e-8	1.2783042452013403e-6	7.248354381097189	Up	5.893365768801503
RUVBL2	1.1372483196423353	10.509296733700344	6.015687013412318	8.92929572273592e-8	1.2897307881343123e-6	7.23859811563717	Up	5.889500932669152
HJURP	0.9856796872367664	8.88070441276043	6.013338896077967	9.012968471567667e-8	1.300994988397455e-6	7.2294286163851185	Up	5.885724376394235
LMO3	1.96008257060348	8.702249771225624	6.007809171449441	9.213093137424972e-8	1.3273700119089794e-6	7.207838811272535	Up	5.877007998212409
PYCRL	0.9140036988358152	7.493753229887527	6.006966314069208	9.243980641421721e-8	1.329308818950896e-6	7.2045485228507316	Up	5.876374114026273
MYO1C	0.950263288596476	11.320941394581546	6.006630364755415	9.256320451995197e-8	1.3302472086758674e-6	7.203237103681308	Up	5.876067643704078
ARRDC1	0.8873677166214184	8.117306143375357	6.000639467553264	9.479131292658486e-8	1.3605586251237986e-6	7.179854409308715	Up	5.866282740161898
ALDH3B2	2.142911536774985	7.464764742283268	5.999329873487097	9.528539774942317e-8	1.366792862137337e-6	7.174743900442116	Up	5.864297297902585
RDH8	0.7012891702592574	7.714994846912758	5.995602955765215	9.670548554347447e-8	1.3862937366849323e-6	7.160201864520167	Up	5.8581447389121895
SERBP1	0.9237774055558444	12.037681839290146	5.993768172224712	9.741227819665297e-8	1.3948104721564072e-6	7.153043683391222	Up	5.855484800625952
TFAP2D	1.3941305185240689	6.708581439350765	5.993744248364408	9.742152779867733e-8	1.3948104721564072e-6	7.152950351547738	Up	5.855484800625952
KCNV1	0.8270563345741948	6.6945495800439785	5.993254874259167	9.761092374723863e-8	1.396648107825561e-6	7.151041227054951	Up	5.8549130026763985
DNMT3B	0.9939668644372972	9.055587452865115	5.988589950608194	9.943472074313303e-8	1.4209662560163276e-6	7.132844876418427	Up	5.847416235232214
RNF125	1.2024788791325405	8.845998033266563	5.9858311458735	1.0052913077592973e-7	1.4330255345934556e-6	7.122085589043725	Up	5.843746070988396
GEN1	1.4325648046776696	7.331159859527792	5.983602449277521	1.0142194702228013e-7	1.4431482566634624e-6	7.113394754066133	Up	5.840689050927679
INPP5K	1.2356360174750822	8.862564597347738	5.983586190938122	1.0142848886379858e-7	1.4431482566634624e-6	7.113331357854048	Up	5.840689050927679
BIRC5	1.4523190122857814	8.092627672447714	5.981271217744583	1.0236423661505221e-7	1.4546530245439623e-6	7.10430507923543	Up	5.837240585713345
MIR6748	0.6965502537139105	9.315563382801788	5.978541440477484	1.0347863681551369e-7	1.4687817390984572e-6	7.093662737191022	Up	5.83304273555601
C20orf203	2.0700731615355803	8.522812280760293	5.978489590738738	1.034999196542398e-7	1.4687817390984572e-6	7.093460608742881	Up	5.83304273555601
MED16	1.076232386578743	8.08356534704561	5.975581222946807	1.0470068391528393e-7	1.4832488837757158e-6	7.082123582454591	Up	5.82878596982026
LINC00958	0.9652534168343854	7.1036162860883465	5.974031750970018	1.0534602563551873e-7	1.49146764883356e-6	7.076084280328586	Up	5.826386162406139
GLDC	2.5786207312439995	8.08653477406207	5.967967104479657	1.0790997380529e-7	1.5258790424544066e-6	7.0524507611510705	Up	5.816479891857307
LOC732360	1.326392660619871	8.541784283023198	5.965391850942139	1.0901730199641057e-7	1.538684054519357e-6	7.042417277268332	Up	5.81285054681258
ESCO2	2.1044699783588268	8.414009371994865	5.9634402046969255	1.0986396937831487e-7	1.5487232011130409e-6	7.034814277193585	Up	5.810026195521077
CENPE	1.5606458486154766	7.682960326622268	5.963088355214819	1.1001730026529912e-7	1.5499296876661198e-6	7.033443659216025	Up	5.809688003088573
VTCN1	1.8703480745389776	9.93110252887121	5.960226625675403	1.1127229103986518e-7	1.5666453825852774e-6	7.022296761082447	Up	5.80502929696813
TACC3	1.5408900607622025	7.889823923678761	5.9578224812837774	1.1233755269189189e-7	1.5796993657269787e-6	7.01293343593341	Up	5.801425556228441
ENTPD6	1.344180073241782	10.663270048106623	5.955729780174573	1.1327302653977073e-7	1.591875659830107e-6	7.004783973665693	Up	5.798090857677852
CCNE2	1.7460149126017468	7.476768114160951	5.954567727562477	1.1379580848047293e-7	1.5982408239562553e-6	7.000259032974278	Up	5.796357780319159
MYO9B	0.7728239057502462	7.815868596814928	5.954147885545986	1.1398527267242682e-7	1.5999196647070263e-6	6.998624264911256	Up	5.795901823625547
RP11-134G8.8	0.791376000786121	7.965930935210042	5.946983321627201	1.1726699214067073e-7	1.6429586731086378e-6	6.970732304788274	Up	5.784373360646863
SLC25A10	1.2131373311657994	7.243767095848694	5.945047025978836	1.1816984298347185e-7	1.6535827753020505e-6	6.963195911354197	Up	5.781574060225854
ESRRA	1.145490541804982	9.95165272617567	5.940410436323825	1.2035982690733897e-7	1.6831983372940147e-6	6.945152443850106	Up	5.773864706533241
KLHL25	1.230181909831379	8.007726417266511	5.937548704563738	1.2173148840485045e-7	1.7013406983595438e-6	6.934017972582539	Up	5.769208708961502
RPUSD1	0.7660323667626141	7.538240620520047	5.93673415188729	1.221247326719529e-7	1.7047539712029349e-6	6.930848987271797	Up	5.768338289198617
CMC2	1.241745842981988	9.9365698400216	5.93466861209361	1.2312756321290244e-7	1.717704584602436e-6	6.922813660667432	Up	5.7650515252014305
LOC51145	1.6495408338759183	5.888758925283392	5.934398459841661	1.2325932455505173e-7	1.7184948729402978e-6	6.921762780168751	Up	5.764851759224783
SHISA2	1.9200750980822008	7.313577867571635	5.9312475195420635	1.248064724498813e-7	1.7379472204387306e-6	6.909506803666583	Up	5.759963416736759
ORC1	0.8159093397603305	6.295033421593538	5.9242811984866535	1.282955342811383e-7	1.783276748978228e-6	6.8824172680672175	Up	5.748781252883326
GRIK3	2.179179956775153	5.373924173198317	5.92378498109294	1.285477128099292e-7	1.785457816468939e-6	6.880488016054248	Up	5.748250406065533
DNAH9	1.927428666650468	7.598466690910297	5.920292596814051	1.3033647156735746e-7	1.8083493832562592e-6	6.866911274485424	Up	5.742717657621014
SPIRE2	1.162610858616783	7.055305402142359	5.912625800444145	1.3435012625848498e-7	1.85952603670168e-6	6.837114753371066	Up	5.7305977363602905
SLC30A2	1.1572393054998162	8.022891761732511	5.912070784740224	1.3464538373655837e-7	1.8624859338021276e-6	6.834958167036418	Up	5.7299069985233935
NIPSNAP3B	1.802447911590628	6.686843619717582	5.909304154346561	1.3612677765651636e-7	1.881839604835914e-6	6.824208964445854	Up	5.725417395628857
CEMIP	1.5361502658397548	9.457793662404235	5.9088242138474865	1.3638539791786658e-7	1.8842762795669496e-6	6.822344402472816	Up	5.724855419008899
CEP170B	1.2603910760093076	8.945938767913303	5.908035015733576	1.3681172143086045e-7	1.8890255730939389e-6	6.8192784776492195	Up	5.723762162682505
MRPL41	1.2745695086251168	10.539555177974968	5.907675230472817	1.3700651399920494e-7	1.890574206144638e-6	6.817880802681823	Up	5.723406271654177
GPR68	1.5676968587458582	7.974967504735272	5.904555848961941	1.3870692940370946e-7	1.912365052715344e-6	6.805763861777227	Up	5.718429201365896
C5orf28	1.442488848413185	8.50012862598533	5.903526133916975	1.392728099424501e-7	1.9172217922222118e-06	6.801764452923048	Up	5.717327643216622
RACGAP1	1.885136051504128	9.51292033964316	5.899541522404724	1.414841500170418e-7	1.9441536746185583e-6	6.78629	Up	5.711269409470926
STAT5A	1.291093746444604	9.83046498585931	5.898854117826588	1.4186913554960617e-7	1.9482736808159903e-6	6.783620994286838	Up	5.710350036307715
MAGI3	1.2766848312613277	9.28622768886652	5.890753794549702	1.4648456145627277e-7	2.0080409116585164e-6	6.752174188585951	Up	5.697227443157228
SYT13	0.8848196748476429	9.18272349699515	5.889715160051992	1.4708699699813974e-7	2.013885939150472e-6	6.7481429796108765	Up	5.695965130306886
MASP2	1.6020689072362648	8.279315094619042	5.888719495599414	1.476668087732597e-7	2.0206153815331386e-6	6.744278750216025	Up	5.694516345353753
CA7	1.8601961406209604	8.5374175953157	5.883307010810057	1.508584604293959e-7	2.0605914723368055e-6	6.723276053981347	Up	5.686008101814294
AP000525.9	1.644180806450651	8.932397178753476	5.879713078598087	1.530153318328899e-7	2.086315719311495e-6	6.709333335093077	Up	5.680619969744788
PARD3	0.7040476952664942	9.605573035566277	5.869406676825554	1.5937119859150265e-7	2.170389078913684e-6	6.669363859554131	Up	5.663462404548458
C7orf49	0.8093004711025031	9.414868274521352	5.867365803856917	1.6066040721612054e-7	2.1866445310515295e-6	6.661451644425557	Up	5.660221811727005
PSMD4	0.9854487396856212	11.13223114972141	5.86709677936253	1.6083111595542853e-7	2.1876665290988405e-6	6.66040873207728	Up	5.660018877772636
NSUN4	0.7758172021350278	8.050463680803146	5.863722040768431	1.6298784343644933e-7	2.2143698752865343e-6	6.647327313076567	Up	5.654749835408767
PRR3	1.84586715101294	8.82075191741522	5.863481759422987	1.631424883284919e-7	2.215155483957013e-6	6.646396004088804	Up	5.654595784811274
ABCF1	1.1937660612271568	10.859284533566743	5.860967455622837	1.647694191846071e-7	2.2359190637749855e-6	6.636651489213789	Up	5.650543921175636
RP11-157E16.1	0.9517453546460182	5.441521507952075	5.860361720345749	1.651637640349564e-7	2.2399417648819013e-6	6.63430407411198	Up	5.649763272522626
IQGAP3	1.3053242985922582	8.662641389935294	5.859449200917709	1.657595933642184e-7	2.2466906022393084e-6	6.630767914303369	Up	5.648456731315613
HIST1H2BG	1.8423627692814517	6.665379329990675	5.85921618395606	1.65912082038859e-7	2.247426006493224e-6	6.629864963125425	Up	5.648314597926517
SLC3A2	0.9089484483942822	9.635784312413298	5.857586058627393	1.6698273855527084e-7	2.2605905771633385e-6	6.623548462795964	Up	5.645778087004323
R3HDM4	0.7945187230359334	11.298767498748902	5.856359452184134	1.6779286740273165e-7	2.2702146737475443e-6	6.618795895980235	Up	5.643933073548819
CBX2	1.421090843061264	8.649789450781842	5.856145220682569	1.679347575652611e-7	2.270791559300005e-6	6.617965873415934	Up	5.6438227287483
HGH1	1.3959494858193224	10.87136873388894	5.852148833904455	1.7060350346511358e-7	2.3055153903002557e-6	6.60248391022779	Up	5.637231974333679
RBPJL	1.6197424999368044	7.110578834302228	5.850498524435793	1.717177561301416e-7	2.318074976768986e-6	6.596091577337565	Up	5.634872521146177
SPIDR	1.675738782967218	7.9018798905089636	5.8489831365969875	1.727472474246937e-7	2.3289830723804165e-6	6.590222341550084	Up	5.632833668012547
POM121L12	0.9039183622842176	11.03845826416272	5.848584285124136	1.7301922328881477e-7	2.329903949161149e-6	6.588677631285221	Up	5.63266198249721
MAD2L1	1.723900742231509	9.640262862494309	5.84531499166343	1.7526456095970558e-7	2.3587517001159435e-6	6.57601722413422	Up	5.627317773800746
CTAG1A	2.6181131577090087	8.104313717211074	5.8379943113542385	1.8039737352300094e-7	2.424977384743089e-6	6.547675682851813	Up	5.615292307258452
FAM109B	2.012378548810416	9.577914855455449	5.83123547120719	1.8526804185925042e-7	2.484611682120628e-6	6.521519058114227	Up	5.604741477148028
TBX10	1.4624429585602163	7.24642097026829	5.825589247292091	1.894363956157553e-7	2.5374878979083847e-6	6.499675478097253	Up	5.595596020363121
ZWINT	1.9767132553724505	9.730319647859284	5.825393863842569	1.8958228577632757e-7	2.5374878979083847e-6	6.498919715174547	Up	5.595596020363121
HGS	0.7465678901058492	8.887256532942867	5.825297264393486	1.896544562884452e-7	2.5374878979083847e-6	6.498546061670166	Up	5.595596020363121
OIP5	1.2691530005078224	7.571025585717314	5.820145596555252	1.935429199020861e-7	2.581964119206896e-6	6.478621852285927	Up	5.588049797289864
LOC100506470	1.9882414758706917	8.183164034766394	5.818746225273441	1.9461270139934186e-7	2.5947226079927403e-6	6.473210700275627	Up	5.585909064118928
TCEB3	1.012874573057294	8.90739642797174	5.815583721268524	1.970519251784476e-7	2.6257140338716965e-6	6.460983289592236	Up	5.580752574619059
ITCH	0.8907523521975191	8.706782334595982	5.8118314173490475	1.9998527597510218e-7	2.660152981996722e-6	6.44647820100148	Up	5.575093386930379
LOC100289098	1.3708855983044126	6.767009574255183	5.809892141094986	2.015181714023211e-7	2.677429874282058e-6	6.438982793920151	Up	5.572281895140802
RAD54L	0.8164269374915873	7.657052288768952	5.804809086403898	2.055913808513018e-7	2.729962392627355e-6	6.419340252790323	Up	5.563843335665074
LCN2	2.5402155241268893	9.021808362216852	5.799169890342797	2.1020548878634253e-7	2.787078262208492e-6	6.397554954090007	Up	5.5548508359626645
PPP1R14C	1.5549156907516135	8.759475112713485	5.79896489436311	2.103751344402071e-7	2.787078262208492e-6	6.396763141295554	Up	5.5548508359626645
CNDP2	0.8998111463314142	11.207261187863692	5.798959010010889	2.103800060681877e-7	2.787078262208492e-6	6.396740412661669	Up	5.5548508359626645
RP11-108K3.2	1.4490269041459491	7.11384738504022	5.797583563912503	2.115217953170269e-7	2.8005828443624182e-6	6.391427876776141	Up	5.55275157589033
KAZN	0.8354148833576343	10.40250878264377	5.797258326725897	2.1179267603883814e-7	2.8025475043913112e-6	6.390171735946709	Up	5.552447017191451
MEAF6	1.1385498900396005	11.11795730007803	5.795863241421113	2.129584965375419e-7	2.8163453423597806e-6	6.38478384881467	Up	5.550314092752405
AKAP8L	0.9268956952222328	7.565715581937302	5.7943389944713575	2.14239502315113e-7	2.8300147652814492e-6	6.37889760295917	Up	5.548211298587537
SPAG5	1.0880204473278576	8.500719032415187	5.7906726435881435	2.1735203981990561e-7	2.8694733520136297e-6	6.364741120016659	Up	5.542197804068154
CHSY1	1.0253056695458709	10.590992039421044	5.789840201736637	2.1806493935551493e-7	2.8772247678862894e-6	6.3615272990159	Up	5.541026209837244
ERVH-3	0.9394356175751586	6.520934285620137	5.789531641758133	2.183297752637748e-7	2.8790587482766015e-6	6.360336074086699	Up	5.540749473089256
MTM1	1.0165157251895192	9.728140722357404	5.7843669160203834	2.2281011290401466e-7	2.9347568066384287e-6	6.340400161777965	Up	5.53242788143883
FUT3	2.282001723879951	8.617283720598671	5.780823644173035	2.259362757539094e-7	2.974220974093034e-6	6.326726363219936	Up	5.52662676807226
PNO1	1.4893814349722252	10.634576581366272	5.780340931130618	2.2636550489138113e-7	2.975628146444628e-6	6.3248637379586965	Up	5.526421341955935
SNORA74A	2.279031855677988	6.314552162830723	5.779541969073039	2.2707771409010777e-7	2.982382905090456e-6	6.321780924582682	Up	5.525436598679037
TMC4	1.435380760052114	10.941055186962608	5.778983480135311	2.2757687542858173e-7	2.9872239431615153e-6	6.319626063078192	Up	5.524732218429125
GNG4	1.505299568830366	7.464970591361462	5.776284787794482	2.3000420596764539e-7	3.017354488723485e-6	6.309214425615328	Up	5.5203736644843655
ZNF367	1.5731461908743718	7.56014585978309	5.772173940907865	2.3375093420471067e-7	3.0612407691296934e-6	6.2933576445561785	Up	5.51410251143753
SHQ1	0.7772762018249093	10.608594791521988	5.771307759884441	2.345480507981326e-7	3.0699226854751004e-6	6.290016983556886	Up	5.512872561882535
ARHGEF19	1.241210893504724	7.802071254938078	5.769999548063598	2.357570465600527e-7	3.0822202675699687e-6	6.284971816305499	Up	5.5111363281185914
NADK2	1.6576384160810136	10.018176395233125	5.76750331233901	2.380810717961828e-7	3.1108262944745098e-6	6.275346009750806	Up	5.507124238797239
SH2D3A	1.1099487168724576	6.742721016851245	5.76664781595037	2.388827449206144e-7	3.1159625547541264e-6	6.272047413358108	Up	5.506407769985792
TMEM214	2.5813338576487297	10.833489876999604	5.766023720648488	2.394692572103852e-7	3.120984459128897e-6	6.269641145319784	Up	5.505708393888774
TSPAN15	0.8732280503797458	8.103331104014943	5.762693320219181	2.426232342725548e-7	3.1557572353165327e-6	6.256801837078654	Up	5.5008964133896185
NPHP1	1.6346081978009854	8.023922655761885	5.762493732076135	2.428135473965665e-7	3.156438153912526e-6	6.256032463806583	Up	5.500802715659502
AK093205	1.671640951688448	4.401796626043435	5.760538160600152	2.4468606031377277e-7	3.1789735229521902e-6	6.248494572320376	Up	5.497713089223839
CNKSR1	0.7707610693016713	7.507950170961841	5.75637331330268	2.487216852157004e-7	3.229570622048814e-6	6.232443618464228	Up	5.490855214161316
SMARCA4	1.0251864504569408	10.49721069137916	5.755316931129819	2.497557006501605e-7	3.241157501517312e-6	6.228373010896953	Up	5.489299864253856
MAFF	1.2746765202507486	10.314362596507856	5.754988555034359	2.500779883243325e-7	3.243500167161226e-6	6.227107712899371	Up	5.488986075351391
TSFM	1.4575599629864353	9.24774309628384	5.748086355997488	2.5694807848894685e-7	3.330716763596949e-6	6.20051758433944	Up	5.477462297130777
HMGN3-AS1	0.7027944369447443	6.679071343857824	5.746931712347183	2.581154121645339e-7	3.3439538589537775e-6	6.196070428773866	Up	5.475739723739006
AGPAT2	1.2839469160567931	9.74274530285183	5.746215122757215	2.588425099495366e-7	3.349580195212357e-6	6.193310601518507	Up	5.4750096199265395
LMNB1	1.3751012964696852	8.149022771138972	5.742156183131705	2.629993146209867e-7	3.399526169047206e-6	6.17768	Up	5.468581611342627
E2F7	1.9300065513271711	7.254788054342078	5.741940867750004	2.6322165360823357e-7	3.400478945738439e-6	6.176851332137091	Up	5.468459909768815
CDC6	1.2005081969700724	6.379243459838966	5.738651121459313	2.666418889300115e-7	3.4411200127052775e-6	6.164185915393424	Up	5.463300180634878
DDN	2.6509692900570316	9.032574582596911	5.738311075825457	2.6699791575028257e-7	3.443430278720809e-6	6.162876885533126	Up	5.463008706020716
OR7E37P	1.155516312220081	9.837127428903273	5.736688050257404	2.687036977110999e-7	3.4634771267223973e-6	6.1566292815275405	Up	5.460487676157949
RELN	1.584386993426877	8.008668171980924	5.735977992667491	2.694533405221767e-7	3.471184109125496e-6	6.153896197977024	Up	5.459522351048615
RRM2	1.6066057648905847	9.731471710807256	5.735811511695995	2.696294013858043e-7	3.4714975094574095e-6	6.153255411836075	Up	5.4594831419814716
PRIMA1	1.5521907003462765	9.6780333425247	5.7327249304884	2.729142513864438e-7	3.511813924336584e-6	6.141376244352604	Up	5.454468503521837
IRF6	1.28961947107093	9.51872127133406	5.729042369666759	2.7688510108767474e-7	3.559151667947114e-6	6.127206095066771	Up	5.448653504789341
MRPS5	0.9441611668802404	10.634199291600066	5.727343372392478	2.787362861648694e-7	3.578679849139195e-6	6.120669517293298	Up	5.446277152118889
GIPC1	1.0948273092595056	9.846387120218733	5.724224696821307	2.821661808810306e-7	3.6186547378795393e-6	6.108672643595759	Up	5.441452851704394
AIMP2	0.8653720755302938	10.181671685089531	5.721617466492999	2.850655525234393e-7	3.6497004903098864e-6	6.0986448352744675	Up	5.4377427741032
LOC729680	1.382193025739717	9.64289252251535	5.720557711175146	2.862524455362472e-7	3.6628465891631985e-6	6.094569282485142	Up	5.436181270490548
LOC101928107	0.6940070982114737	6.0932231526589336	5.720294336944633	2.8654817275565876e-7	3.664581131624772e-6	6.09355644983711	Up	5.435975658845517
LMF2	1.2613113510775236	11.163446140518133	5.718020053375685	2.89114412598085e-7	3.6953344390120593e-6	6.084811096825942	Up	5.432346250518218
GCDH	0.8233330183820478	7.945887445602977	5.7154334865167025	2.920606145221611e-7	3.7297781822267542e-6	6.07486630523032	Up	5.428316995831916
RPL7AP71	0.9515296863637728	7.784261817960359	5.715368292223555	2.921352551488415e-7	3.7297781822267542e-6	6.074615666385843	Up	5.428316995831916
PTTG1	1.583269320752576	11.200832451214982	5.711168115210892	2.969839235074516e-7	3.783237854079613e-6	6.058470112586085	Up	5.42213635353491
CACFD1	0.7363382423918328	10.381499340606863	5.70938373585385	2.990677746644499e-7	3.807663670866972e-6	6.0516121130139675	Up	5.419341419619851
PRSS8	1.5618757943405868	8.009735930406276	5.708730704231994	2.99834007474073e-7	3.811056809444063e-6	6.049102459024733	Up	5.418954577377351
PI3	1.4462200396840377	9.219195039856906	5.704647987277985	3.046685835975793e-7	3.864486348650018e-6	6.033414396158885	Up	5.412908222514459
PRUNE	0.9226075780338174	10.091061977152284	5.698499736093616	3.120946529111898e-7	3.951529365774827e-6	6.0097964236047785	Up	5.403234786255043
MAP4	1.011806275450228	11.696118260984845	5.6977218848543405	3.1304681208565985e-7	3.961392706696798e-6	6.006808978092114	Up	5.4021521023325105
RP11-521D12.1	1.0575765194703388	7.914817759592936	5.695887780692839	3.15303287299856e-7	3.987741243854839e-6	5.999765383409524	Up	5.399273029901971
NAAA	1.3374920426098171	9.070049744272008	5.6940469592269425	3.175841712520706e-7	4.012152542283889e-6	5.9926967503575606	Up	5.396622563435081
LINC01270	1.4637616864344078	6.38859131481041	5.69069730708604	3.217764477625733e-7	4.060630638918872e-6	5.979836258851331	Up	5.391406512793829
HSPBP1	0.9187247382327612	8.440675386822482	5.6892557259569765	3.2359743867372173e-7	4.081359316105887e-6	5.974302298792819	Up	5.3891951689776
RAB3GAP2	1.215680308939172	5.502160548146137	5.687435500407505	3.2591126777529696e-7	4.106015360920165e-6	5.967315461965499	Up	5.386579430233233
RP11-84D1.2	1.5823173166962905	7.509532387540403	5.687282288343732	3.26106771027898e-7	4.106217289128937e-6	5.966727399841672	Up	5.38655807275091
ZNF107	1.1202449297166934	8.157266986743771	5.686165834865126	3.27534899414413e-7	4.121931223158611e-6	5.962442361762293	Up	5.384899258954644
HOXB4	1.1686276033589618	9.281729673326506	5.675727469342082	3.411895497080561e-7	4.289052586687151e-6	5.922392701204873	Up	5.367638628984045
BC017398	2.5542884900429126	7.934355377488226	5.674209042164737	3.4322209491825365e-7	4.312234107432578e-6	5.916568893742952	Up	5.365297669712259
EPRS	0.8971306235733518	10.63032877823394	5.6727219344571305	3.4522429930287357e-7	4.330255890214059e-6	5.910865717129432	Up	5.363486438883519
MIR1204	0.9438116812830284	8.42942132714544	5.671498451596492	3.468802064383212e-7	4.3486423249875896e-6	5.9061739396887	Up	5.3616463115050985
H2AFX	1.2044244167617872	9.495638073619524	5.6704946836317145	3.4824459559622145e-7	4.3609677628056655e-6	5.902324972951468	Up	5.3604171237112
CERS2	1.213316980683567	11.322665394036582	5.670217694227312	3.486220298949573e-7	4.3633060295222805e-6	5.901262892344826	Up	5.360184325800284
SCNN1A	1.2484590422027697	11.639991001951795	5.6683759839032755	3.5114188868403525e-7	4.392441372991822e-6	5.894201532813285	Up	5.357294026430519
SRGAP3	1.200243680919444	10.153015285116028	5.667641876783682	3.52151309687126e-7	4.402661100727735e-6	5.891387084990176	Up	5.35628474350901
NXT2	0.8310144997566482	10.216948328276228	5.6642503618944104	3.568520563504924e-7	4.456560151333469e-6	5.878386161775851	Up	5.351000227317272
CD1A	2.0607579896420525	8.667186333961949	5.661288649630033	3.610077017189495e-7	4.501101765878732e-6	5.86703497882965	Up	5.346681167941336
ECSCR	1.6781859358211744	8.003086344811708	5.661287827822335	3.610088614182208e-7	4.501101765878732e-6	5.86703182941329	Up	5.346681167941336
UFSP1	0.7968595479514962	7.105108579458072	5.6571146043246605	3.669455997235327e-7	4.571626180434799e-6	5.851040765686196	Up	5.339929288865505
ARHGAP11A	1.2701214200646636	5.6655281638787995	5.650959502947543	3.758779696938095e-7	4.678842257140732e-6	5.82746278551505	Up	5.3298615963996445
LOC100129098	1.3148945188798802	10.98315068039484	5.648692850701507	3.792211422652181e-7	4.716152473763695e-6	5.818782251216043	Up	5.326412162558337
FAM208A	1.2727521457570017	11.194291962784062	5.6485325218146585	3.794587255975914e-7	4.716152473763695e-6	5.818168289017614	Up	5.326412162558337
FMN1	0.9094754483866474	6.916032275441821	5.648508918245611	3.794937149437896e-7	4.716152473763695e-6	5.818077902193358	Up	5.326412162558337
MRPL14	1.071585688584733	10.455890152372492	5.647520686141032	3.809615063285225e-7	4.731823183110894e-6	5.814293710042974	Up	5.3249714922845905
GABRQ	1.9187466966964637	7.420155262381185	5.646051799117853	3.8315355770132324e-7	4.753888420091418e-6	5.808669384198494	Up	5.3229510159413005
GRM5	1.2744960374835743	9.432142260959816	5.6455085364744075	3.839674290661061e-7	4.7592489624097256e-6	5.806589373430376	Up	5.322461576106334
MOSPD3	0.7795301923228131	8.041221588170856	5.644337323722324	3.857278513829899e-7	4.772886701888278e-6	5.802105337583417	Up	5.3212188747325895
OXLD1	0.9187317696788656	9.889057468266197	5.640461110214502	3.916110861817618e-7	4.840448428283375e-6	5.787267357570513	Up	5.315114402630852
SLC52A2	1.7707470291229497	9.492550168711135	5.640013767716062	3.9229572617704777e-7	4.845469670354822e-6	5.785555173381288	Up	5.314664120500222
AGMAT	1.926075334697116	7.09240216699061	5.639780837242794	3.9265268450709555e-7	4.845469670354822e-6	5.784663660357487	Up	5.314664120500222
MTX1	1.22043622510318	10.136323302699155	5.635403272362902	3.994210821379292e-7	4.926336893926514e-6	5.767911403727635	Up	5.307475891690923
RAD23A	0.8197467644725105	10.651553205871014	5.632483053950658	4.040000732662718e-7	4.9801280583292204e-6	5.756738658586737	Up	5.302759489708014
ERV3-2	1.594810039709328	9.50594307883479	5.629928368004163	4.080483470139131e-7	5.02461686293397e-6	5.746966066346698	Up	5.298897048466156
STAT3	0.9464992428992698	11.142491696116013	5.627677060225054	4.116490329204947e-7	5.064150471948723e-6	5.738355265155252	Up	5.295493398534513
CD300LG	0.6819108024968603	9.483132787292536	5.627610480665035	4.117559944921323e-7	5.064150471948723e-6	5.738100629673101	Up	5.295493398534513
FAM111B	0.5690218701128424	5.965310291838269	5.626472372233546	4.1358863776600706e-7	5.081898197340749e-6	5.733748060543198	Up	5.293974039162862
WAS	1.2175627899395796	11.107182239871076	5.623161154714408	4.1896642732035316e-7	5.142453267522725e-6	5.721086397944721	Up	5.288829646302995
CACNA1H	1.7617994535270922	8.096332010368059	5.618189220127758	4.2717122252837017e-7	5.237540407409743e-6	5.7020791888767475	Up	5.280872613448582
ADA	0.9198845817525596	8.263850542975426	5.616289407242365	4.3034801830394914e-7	5.270841708124225e-6	5.694817924454633	Up	5.278120026152798
TP53I11	0.8481407720431395	6.711543407352388	5.61584487668883	4.310947038123166e-7	5.2771619735270155e-6	5.69311900899704	Up	5.2775995756865415
CLDN10	2.5272071647810455	7.819138259959558	5.60976688193188	4.414331310343983e-7	5.3893002160811095e-6	5.669894672510202	Up	5.26847
LINC01134	0.7246450691280115	8.29905253473658	5.609081589136889	4.426140198952999e-7	5.400835285965102e-6	5.667276678538879	Up	5.26753906757851
YRDC	0.8792331887679126	9.4041021340576485	5.607595043508242	4.451863405513094e-7	5.423545412925136e-6	5.661598074284206	Up	5.265716719017787
NCAPH2	0.9268644229592686	8.069079969239727	5.606443404888068	4.471892699318078e-7	5.4450469966843156e-6	5.657199173308427	Up	5.263998367457778
AC079741.2	1.0095551318945637	6.2168791104344665	5.604138157546244	4.5122529723072906e-7	5.488348524902631e-6	5.648394787422958	Up	5.260558317557144
MICALL2	1.1211040973732462	7.702353659297533	5.6011648771771005	4.56484013166295e-7	5.54641409305983e-6	5.637040852123914	Up	5.255987709295232
C5orf34	1.6361514982409808	6.850319110213274	5.599937501170163	4.5867240763792186e-7	5.570045655174105e-6	5.632354535683192	Up	5.254141245093969
NME1	1.0795755534732638	11.164869585086976	5.596697614236803	4.644989146288406e-7	5.634820078363332e-6	5.619985849186716	Up	5.24911994656046
TAF7L	1.23975598887447	5.101779674533351	5.5926122831344145	4.719499958934122e-7	5.71309204023565e-6	5.604393124628971	Up	5.243128779222408
POLDIP2	1.4558978469094122	10.747899600379217	5.591922036606777	4.732204994485705e-7	5.725442520826993e-6	5.601759012016648	Up	5.242190940966046
GPIHBP1	1.7961384194081689	7.516457856721523	5.589754885585941	4.772314318729168e-7	5.7709185675583855e-6	5.593489487250102	Up	5.238755053903009
MYO10	1.628605310497962	9.402599946449117	5.588529221804112	4.795146973495199e-7	5.795465800665434e-6	5.588813032903393	Up	5.236911652620333
NTN1	1.0092335170231816	7.63946195924361	5.584903019585858	4.863331563454684e-7	5.8747710052946e-6	5.57497955294964	Up	5.231009057239237
DEPDC1	1.9907600123121243	9.283210383773328	5.582498191035045	4.909076704339545e-7	5.923774573765002e-6	5.565807184801245	Up	5.227401476692474
RP13-638C3.2	1.2657579757303823	5.5122305190231655	5.5821193622388146	4.916321447537794e-7	5.929389478029372e-6	5.564362402502277	Up	5.2269900216396
DARS2	0.6987169016795951	6.899756145504962	5.581205660111879	4.933838551143957e-7	5.9473810438157325e-6	5.560877854604374	Up	5.225674235718787
TBC1D7	1.3698954282147602	8.02301692774187	5.577755520520892	5.000539906122571e-7	6.024610453511231e-6	5.547722004884412	Up	5.220071028978795
C1orf186	1.5753305768089731	10.863479188401922	5.576963610754448	5.015974889084442e-7	6.039460215704685e-6	5.544702748671525	Up	5.219001875255787
INPP4A	1.5597934479771451	8.89953771950713	5.576852465103882	5.018144967024174e-7	6.039460215704685e-6	5.544279003863074	Up	5.219001875255787
PRSS2	2.063697531710325	7.6495187427874205	5.57461641043033	5.062000312293986e-7	6.085838420650241e-6	5.535754635426243	Up	5.215679582367521
EIF3I	0.8672958405203453	11.20387101344446	5.574089321872206	5.072392927309809e-7	6.095130135710142e-6	5.533745424447422	Up	5.215017017425835
CXCR1	0.5043059812977573	8.289330872854006	5.573153698682997	5.090892474471576e-7	6.114148499917857e-6	5.53017908330061	Up	5.213664017374456
CRTC2	0.9687086485240428	8.614203147459536	5.572327639150418	5.107280972521398e-7	6.130612873573823e-6	5.5270305441449095	Up	5.212496107160791
PKM	1.385917729681923	10.920632192271476	5.570299382160172	5.147741316408845e-7	6.169469543117756e-6	5.519300507294495	Up	5.209752175415781
COASY	0.9573291440519878	9.374387193153275	5.568513823658488	5.183621719739664e-7	6.205969718781987e-6	5.512496257009473	Up	5.207190347829838
HELZ2	0.8765151878054365	8.321513825618785	5.5672927023244805	5.208301760953757e-7	6.2289982221046015e-6	5.507843357514704	Up	5.205581793083199
RAPGEF3	2.457255457361671	9.519121229134674	5.563050367973859	5.294947295809571e-7	6.3260104010875815e-6	5.491681379624798	Up	5.198870098362245
FAM171A1	1.622489507918802	9.438563501956343	5.560090833289247	5.356232937254897e-7	6.395890050702233e-6	5.480409049643296	Up	5.194099010651841
SNRPB	1.1491607176290923	10.760948297732876	5.559669874157651	5.365006726202779e-7	6.4030249811577135e-6	5.478805865225001	Up	5.193614803789172
GGA1	0.842098419674695	11.371317004567688	5.556922783622138	5.422611596725754e-7	6.461663058410861e-6	5.468344877550176	Up	5.189655691890649
MID2	1.5641403221138246	8.061711211369259	5.556133508348019	5.439274713675155e-7	6.4747745147853214e-6	5.465339636948982	Up	5.188775351368661
SFXN1	0.6093868604102717	8.349135559110412	5.555287125577355	5.45719957605802e-7	6.492733702580938e-6	5.462117122342323	Up	5.18757240921277
STAT5B	0.6038700665840828	9.159237250166695	5.554962235578688	5.464095618491697e-7	6.497559441552575e-6	5.460880183626984	Up	5.187249738757277
IL11	1.0755831911647755	7.678631843255176	5.547193089717929	5.631585044229972e-7	6.6897733243477435e-6	5.431308729191614	Up	5.1745885975763874
BMX	1.2510499346652395	6.507455021427504	5.545000146781202	5.679770244649248e-7	6.740013663243265e-6	5.422964464815236	Up	5.171339223069259
UTP11L	0.6424966819532099	9.00537918394507	5.540818702456137	5.772777523752185e-7	6.84331290295389e-6	5.407057107177205	Up	5.16473360191229
TBC1D9B	0.7055980710042764	9.87019174550104	5.540817606778514	5.772802090432715e-7	6.84331290295389e-6	5.407052939481109	Up	5.16473360191229
ZNHIT1	0.8739051973669731	9.856619610996376	5.540025527305973	5.790588654076028e-7	6.860842973413021e-6	5.404040135274642	Up	5.163622520414245
HOMER2	1.166885142857522	9.01686111175758	5.531298990428264	5.990159593563169e-7	7.0826284930817434e-06	5.370857520320697	Up	5.149805537763379
NRGN	2.0419895018606384	9.210773496192834	5.529090219912219	6.041738768703829e-7	7.139924653366472e-6	5.362461653266485	Up	5.146306371249012
BAZ2A	0.6768642840029573	8.117810717431352	5.524051766445033	6.161040533714433e-7	7.2746802435242994e-06	5.3433142449883855	Up	5.138186091211453
CDKN3	1.718007081825463	7.399636284170737	5.523873383771823	6.16530660963924e-7	7.2746802435242994e-06	5.3426364603494525	Up	5.138186091211453
FAM69C	0.5302267342294886	7.150544183691656	5.5232703209337055	6.179750611614477e-7	7.287964651707609e-6	5.340345114898899	Up	5.137393742457336
CLDN2	0.659309624567852	6.852219092605157	5.522823717013137	6.190468745035393e-7	7.296843607298545e-6	5.338648295247954	Up	5.136864961848623
NEURL1B	1.3764297648404114	9.822594967187737	5.522486110579968	6.198583184951667e-7	7.302645967482449e-6	5.337365631646484	Up	5.13651975345902
TYSND1	0.80086051349243	7.45316958000963	5.520600015885928	6.244109107470124e-7	7.352494712805403e-6	5.330200336771115	Up	5.133565279122867
ISG20L2	0.9331524893241738	9.438327466995633	5.519608378354141	6.268176939746068e-7	7.377038076360612e-6	5.32643344831654	Up	5.132117974937902
HIST1H1E	0.947009728559058	5.815041932843985	5.518364791807781	6.298489035812927e-7	7.407312877811432e-6	5.321709837318784	Up	5.130339310777428
TEAD4	0.974415908160239	8.566265030975888	5.51828756129703	6.300376266541827e-7	7.407312877811432e-6	5.321416499350625	Up	5.130339310777428
RALY	1.0036665924578203	8.960177726189828	5.516536432265545	6.343317336015949e-7	7.44631900106254e-6	5.3147657348996225	Up	5.128058362499362
USP39	0.7769026365450244	8.593969421475286	5.515600063601445	6.366397127578345e-7	7.46957948112128e-6	5.31120973190296	Up	5.126703847203243
URB2	0.7209868899999652	8.30821230647494	5.5150281645447174	6.380534091932816e-7	7.478495875478018e-6	5.309037965101559	Up	5.126185741529503
OAS2	1.0442999284656531	8.25349539653018	5.513776455619826	6.411583550265747e-7	7.511040452971328e-6	5.3042849277741935	Up	5.124299898989714
ST7L	0.844420074273315	8.488078499097833	5.513108007830538	6.428225779119969e-7	7.526682579349323e-6	5.30174683176324	Up	5.1233963989576
LINC01366	1.666537968890137	4.652502337052279	5.511097530585955	6.478537279052462e-7	7.577835092404973e-6	5.294113720910526	Up	5.120454850002938
PRR18	1.0181645192024955	7.361879034501583	5.510555980738284	6.492155589980197e-7	7.589883890810267e-6	5.292057809105793	Up	5.119764867841819
TTC17	1.2894231861545222	10.722365234555838	5.508895220621098	6.534094746515889e-7	7.631115554136653e-6	5.285753441336877	Up	5.117411970093308
LOC101928717	0.9184425384977885	8.296150996102572	5.507940076505117	6.55833580329234e-7	7.655518614465583e-6	5.282127955560832	Up	5.116025383179771
MARC1	1.0431339803813966	8.807945504112642	5.506490140338769	6.595303900119317e-7	7.69474543247475e-6	5.276624799465911	Up	5.113805743486858
DSCR9	0.5743614572342404	6.541988267438819	5.504585720065804	6.644171826717245e-7	7.743861804557507e-6	5.269397471026285	Up	5.111042405964852
AP3B2	1.117946880034646	12.55114408015594	5.499876585838417	6.76654667649116e-7	7.878464193966475e-6	5.2515300709485	Up	5.1035584344256995
MTHFS	1.0527940286548096	7.836147556103182	5.498426654972586	6.804670840790101e-7	7.918823202768907e-6	5.246029861307414	Up	5.101339353071722
ZNF276	1.4595384583936903	7.374948501216037	5.498278892396802	6.808567941223857e-7	7.919330245412334e-6	5.245469364098446	Up	5.101311546064684
TTLL7-IT1	1.7431666432366963	7.724186848056952	5.4972312322827195	6.836262146838635e-7	7.94750211674396e-6	5.241495507115183	Up	5.09976934774284
RECQL4	0.8894594885961045	8.467765746411349	5.4967567904575505	6.848840190617946e-7	7.958080991424478e-6	5.239696002724231	Up	5.099191645241183
CYP3A4	1.4156911898644855	10.922128180213102	5.495251233023915	6.888905579243231e-7	7.995463584682426e-6	5.233985967462842	Up	5.097156350375203
KIF18A	1.5371423563100155	6.530228343144899	5.495154180603827	6.891496214429713e-7	7.995463584682426e-6	5.2336179022521945	Up	5.097156350375203
PFKFB2	0.6761921005386791	7.862950971496483	5.494324831240116	6.913673350798594e-7	8.017127855697973e-6	5.230472743446156	Up	5.095981190297917
DIRAS2	2.2405540859925077	6.46673235956409	5.49418605961117	6.917391021375859e-7	8.017375338300824e-6	5.2299464938109965	Up	5.095967784166465
KIAA0586	1.645576343647929	8.753914691636048	5.486361874607791	7.130216875554986e-7	8.24316482545844e-6	5.200283474196509	Up	5.083906016173353
LOC100288175	1.8757588905787976	8.052455275380122	5.483913183606737	7.198139723807237e-7	8.311807323657759e-6	5.191003180759846	Up	5.08030453273217
RAD9A	1.4986376669430346	8.753500399123578	5.483828845320247	7.200490456527679e-7	8.311807323657759e-6	5.190683574117478	Up	5.08030453273217
FAM136A	0.885525135025313	9.575852274694176	5.483188756812185	7.218356098556345e-7	8.32708638255618e-6	5.188257966482131	Up	5.07950693008496
LOC101929889	1.3914004665649466	7.907489037511074	5.479931236520303	7.309956283372723e-7	8.415089172578113e-6	5.175915240182875	Up	5.074941277554656
H2AFY2	1.4820223286728762	11.670826356180918	5.479899846432956	7.310844507434236e-7	8.415089172578113e-6	5.1757963163952185	Up	5.074941277554656
RP11-1L12.3	1.4463374179139477	7.4077601500643135	5.477177056295566	7.388295428281472e-7	8.498582760364595e-6	5.165481765237019	Up	5.070653492011737
ADRA2C	1.5410868840145495	7.641829758668861	5.4722514220100456	7.530466355174157e-7	8.649073280121966e-6	5.146827121799677	Up	5.063030423273934
LOC101929486	1.1511627374766569	5.677348316257646	5.469390353292203	7.61428051947073e-7	8.736565897942368e-6	5.135994353846592	Up	5.058659242955049
OR8G2	2.9106939361853437	7.479575187254258	5.469178840301709	7.620513081681933e-7	8.739334275478744e-6	5.135193592165408	Up	5.058521648772661
SMN1	1.0606242327547155	8.89769176494392	5.468666761823688	7.635623096357287e-7	8.752275592262443e-6	5.133254974456505	Up	5.057879015700494
C14orf64	1.2825243114384586	7.148048488636845	5.4575011519844425	7.972524991501482e-7	9.124732330193216e-6	5.091001067676101	Up	5.039779866512592
S100A14	2.112933353255883	9.575428063635265	5.45547814792056	8.03511320343777e-7	9.18717416199164e-6	5.083348851554859	Up	5.036818050591659
SUMF2	0.623783396654801	7.884833761974858	5.453645181496821	8.092239719775392e-7	9.246572757870945e-6	5.07641637985883	Up	5.034019208683069
VSIG10	0.922583079923312	7.655630728653577	5.4532410808274445	8.104887698022367e-7	9.253080121908868e-6	5.074888144868512	Up	5.033713677284363
SF3B4	0.7616322731880754	9.0711306279107	5.451150654810487	8.17062762267154e-7	9.318832970044973e-6	5.0669832060686195	Up	5.030638472453389
METTL7B	1.774170376516274	9.950864288479146	5.450060381350279	8.205122744089029e-7	9.353512868062426e-6	5.062860787197908	Up	5.029025251941023
RUNX2	2.0554933712346006	7.490499687114946	5.448384874666575	8.258413801162052e-7	9.40318122655063e-6	5.056526147708721	Up	5.026725193697654
UBL4B	0.6836904010923144	7.9899835779000865	5.447972203908868	8.271591410214645e-7	9.410529083754393e-6	5.054966061829469	Up	5.026385958751752
LOC101929297	0.8111393380267549	5.3986645543802325	5.445415078723161	8.353709764627101e-7	9.485088124312826e-6	5.045299928685782	Up	5.022958629801677
POU2F3	1.8758548644965547	6.586315147706366	5.444474684247354	8.384110650560645e-7	9.514884304274652e-6	5.041745588766871	Up	5.021596488125314
LOC285593	1.4877549663452374	6.84735813756806	5.442933171315811	8.43418022176592e-7	9.562220480365831e-6	5.035919740083695	Up	5.019441246803969
SMG5	1.3634455759522055	10.474630380053254	5.442271201501984	8.455771800426783e-7	9.58195161079566e-6	5.033418142400568	Up	5.018546026675274
RFXANK	1.35963626378756	8.71017037780465	5.44128042131806	8.488189985135411e-7	9.609168662538994e-6	5.029674175390313	Up	5.0173141837039195
LACTB2	1.1660966650538622	9.136116660646117	5.438693339733337	8.573417085342524e-7	9.700851112539643e-6	5.019899292284541	Up	5.013190160861186
LOC100130429	1.7398025701998163	6.093388927508411	5.435455625115887	8.681266226033131e-7	9.813176382678458e-6	5.007668539277943	Up	5.0081903950475875
MED20	1.187325189358701	10.406467098192609	5.4348676030164595	8.700996247999662e-7	9.830621884344902e-6	5.005447525869022	Up	5.007419007865062
E2F2	0.7051937891910027	8.115179354278444	5.434536392655372	8.712128847850385e-7	9.838341357846444e-6	5.00419655350447	Up	5.00707811293575
AK022793	0.8672855282275487	6.496775466826561	5.4317380171686	8.806749065216279e-7	9.935385200349273e-6	4.993628305214487	Up	5.0028152903918
RAB5A	0.956614419584195	11.998328219340976	5.427002296555388	8.969186290818193e-7	1.010867059840539e-5	4.975748190850616	Up	4.995305955164604
PTBP2	1.3089924053687056	11.236334528727552	5.424012886848891	9.07323943887056e-7	1.0215878204818877e-5	4.9644644332327745	Up	4.990724293435557
PRPF4	0.8254004603002212	9.476713680251464	5.422566124486687	9.124023168801324e-7	1.0257912829435158e-5	4.959004355516032	Up	4.988940995839202
ATN1	0.993902038617545	11.7540603016255	5.421069259674978	9.176860134875732e-7	1.0309651398134086e-5	4.95335576751638	Up	4.986756019335911
KIAA1614-AS1	0.5864708536513996	7.347697718480786	5.421007263579852	9.179054984046128e-7	1.0309651398134086e-5	4.9531218309129015	Up	4.986756019335911
PLAG1	1.922475182126454	8.45307828128772	5.418355403867727	9.273424275944304e-7	1.0405427857250112e-5	4.943116222867151	Up	4.9827400574780665
BRIP1	1.7352875293109502	7.533339597191297	5.417479322272734	9.304809998607984e-7	1.0435526860693728e-5	4.939811125305314	Up	4.9814856197259
DUTP1	0.6564571120057154	6.597528371818727	5.415604256229408	9.372336322718564e-7	1.0494253124321154e-5	4.93273794458315	Up	4.9790484647069455
TDP1	0.8900383894470245	8.46313150874547	5.415262543484193	9.384694214065772e-7	1.0494253124321154e-5	4.931449024861485	Up	4.9790484647069455
TMEM185A	1.7952814755877036	8.69625378685808	5.414950687209011	9.395986359329958e-7	1.0501747528828046e-5	4.930272748691576	Up	4.9787384267416694
CCT8L2	2.049646483848071	7.802769401436814	5.414124519196081	9.425966151091962e-7	1.053011130716958e-5	4.927156687489361	Up	4.977567038137015
LIN7C	0.7599313769079661	10.548555548214614	5.412355176669967	9.4904888040747e-7	1.0597017732963644e-5	4.920483854615955	Up	4.974816338919075
XKR4	1.6248744894606668	6.587949628905734	5.411918592895427	9.506476478486832e-7	1.0609691480551229e-5	4.91883746535061	Up	4.974297244773708
CCS	0.7714240516665409	8.247791466748875	5.410511044918944	9.5582015643506e-7	1.066221811754156e-5	4.913529840713287	Up	4.972152437335742
SMR3B	2.524709655387828	8.282076979509277	5.409398770155952	9.59927173171686e-7	1.0697600484654166e-5	4.909336010174884	Up	4.970713625411839
CNNM4	0.8243896580347165	7.6411200989242865	5.409268807598585	9.604081852436074e-7	1.0697750180228089e-5	4.90884600778213	Up	4.9707075482072405
IFRD2	1.2180009965403062	10.583285611998472	5.407521149435621	9.668996415520451e-7	1.0764816009279437e-5	4.902257183199942	Up	4.967993388677236
TINCR	1.3660466953178387	7.863053430349998	5.405723081531107	9.736234162620226e-7	1.0829134730509876e-5	4.895479150021095	Up	4.965406242984779
LOC102724165	1.91503849532441	9.08684797923314	5.405506572539565	9.744361379706388e-7	1.083290787202636e-5	4.894663050887469	Up	4.965254950275528
HDGFL1	1.2939922980415837	11.143971677885531	5.404107027065938	9.797058234836916e-7	1.0885043098495225e-5	4.889387966484361	Up	4.963169847063714
TRAPPC3	0.8748941716972176	10.61697520515956	5.404008645811741	9.800773103238849e-7	1.0885043098495225e-5	4.889017173113216	Up	4.963169847063714
CSNK2A1	1.1218512748645717	9.90395056474898	5.403048279917682	9.83710935506812e-7	1.0920098250102063e-5	4.88539774281563	Up	4.96177345418758
C1QTNF9B-AS1	1.6403216027439012	7.816229393481602	5.3994299074728085	9.975208467914369e-7	1.1068030772910416e-5	4.871762998812025	Up	4.955929642042234
E2F3	1.3824700644680696	10.275718561058074	5.398493494346908	1.0011257430629046e-6	1.110264463186437e-5	4.8682349731873105	Up	4.9545735606526895
FOXA2	1.9743497766191125	7.908650482621919	5.394495015126091	1.0166634556879888e-6	1.1264040291857384e-5	4.8531729374775745	Up	4.948305804712969
SNRNP25	0.9093210520171128	9.838731960707968	5.393318417901503	1.0212806316496988e-6	1.13097190568797e-5	4.848741573020727	Up	4.9465481831879226
LGR6	1.652119872010135	7.744618491371212	5.3927000119567765	1.0237156344166591e-6	1.1331199806395135e-5	4.846412646369811	Up	4.9457241023423375
RTN2	0.7023798704684943	8.705590945756134	5.392398375536557	1.0249054146507497e-6	1.1338883453478966e-5	4.8452767156778185	Up	4.9454297085706935
SOHLH1	0.8517111589824085	7.810082920986206	5.391430626025424	1.028731819144317e-6	1.1370219946957889e-5	4.841632437193485	Up	4.944231134184189
GPR160	1.8362910880603724	7.9544169334202435	5.3912186568765375	1.029571803573223e-6	1.1374009316249044e-5	4.840834252928944	Up	4.944086420360808
LGR4	1.5279044535294748	10.040121988991974	5.388593766210635	1.0400297416539484e-6	1.1472922111523956e-5	4.830951039148711	Up	4.9403259547853455
TTC5	0.7166021739391635	8.25255813241651	5.387620462249132	1.043934035781199e-6	1.1510441833560508e-5	4.827286830461808	Up	4.938908005458446
CWC15	1.0257740867591405	11.158279534949704	5.383905230172534	1.0589703211129298e-6	1.1653767184580432e-5	4.813302375499254	Up	4.933533662362395
NOP16	1.1470651282960826	10.902922010905472	5.383587067478075	1.0602678533774616e-6	1.16624366429918e-5	4.812104954824382	Up	4.933210702574386
LOC728445	0.8460969078904901	6.044871459825352	5.379183811139797	1.0783867157396094e-6	1.1838968171500252e-5	4.795535865028261	Up	4.926686147017747
NOSTRIN	1.9267400555724752	7.9667938961802465	5.3735708435255916	1.1019257286228557e-6	1.2062659686680534e-5	4.774422258450998	Up	4.918556924376843
FAM64A	1.104029802705659	7.813971108994034	5.3721889127262354	1.1077982438988806e-6	1.212070631512031e-5	4.769225316909279	Up	4.91647207160361
AMN	0.6872030115880685	7.112916059832489	5.372074024624982	1.1082878452393765e-6	1.212070631512031e-5	4.768793287442965	Up	4.91647207160361
RPP40	1.1955651145089128	9.283135672283215	5.3710933243668215	1.1124758238093597e-6	1.216069487478946e-5	4.7651055702917455	Up	4.915041608314559
LOC100996506	1.1996765209779046	10.664363973178569	5.367985446605959	1.1258508318121e-6	1.2289284914613089e-5	4.753420758110541	Up	4.910473386981143
PNKD	1.153239509782832	10.045233319069036	5.367715338015311	1.1270207124040884e-6	1.2296188306672932e-5	4.752405342846028	Up	4.9102294945711975
RP11-138I18.2	1.2226368047799347	5.994767517851498	5.367319792135689	1.128736039337696e-6	1.2309033290756504e-5	4.750918408478641	Up	4.909776053727976
WFDC21P	1.1294790768670406	7.521765525323854	5.364579645934875	1.1406897201932996e-6	1.2421627847835555e-5	4.740618820502232	Up	4.905821486365025
HS3ST2	2.0420124937053092	8.683884339724148	5.363698139158189	1.1445616434243865e-6	1.2446226452761578e-5	4.737305866997304	Up	4.9049623015123975
DHRS13	0.9916300988886366	8.775489334859445	5.36369382157293	1.144580639739952e-6	1.2446226452761578e-5	4.7372896407983935	Up	4.9049623015123975
LOC645513	1.3377708543505946	7.447590159161307	5.362676702940692	1.1490643676358195e-6	1.2489046872750554e-5	4.733467281126667	Up	4.9034707044361
JARID2	0.9400805884274296	9.434390188665102	5.359483128991577	1.163255103825668e-6	1.2625291043846043e-5	4.721467559209461	Up	4.898758601543604
LSG1	1.036345534224452	9.12546645977134	5.358156042786414	1.1692026373148664e-6	1.2682967737545487e-5	4.7164818989011765	Up	4.896779112287578
CTB-92J24.2	1.48810433137744	7.382774190732622	5.358050270960249	1.1696779547279592e-6	1.2682967737545487e-5	4.716084550803916	Up	4.896779112287578
SLC5A2	0.6743758646880549	7.8529876749265615	5.356735566040559	1.1756018670904925e-6	1.2735130263808416e-5	4.711145912847974	Up	4.8949966084103105
LRIG1	1.9668335775169543	10.268944487172782	5.356610783182102	1.176165656037797e-6	1.2735207782531357e-5	4.710677195213136	Up	4.894993964868356
XK	1.9041766584047704	6.704195145339643	5.355243682794754	1.1823598838947353e-6	1.2796221278915632e-5	4.705542278562636	Up	4.892918258476872
DCHS2	2.3996216755479134	8.90133011356645	5.354839467436131	1.184197492936964e-6	1.2810049381042455e-5	4.704024116818673	Up	4.8924491961044225
HIST1H1C	2.00368502071977	8.42715341979418	5.354548949251945	1.1855199569107846e-6	1.2818092013359808e-5	4.7029330090163635	Up	4.8921766152023345
PARS2	0.7908235414423146	8.6787298192602	5.354426068707953	1.1860797569821694e-6	1.2818092013359808e-5	4.702471509783771	Up	4.8921766152023345
CLCA4	1.0705422942556249	5.044865565151125	5.3486975032474	1.2124677443177588e-6	1.3072596381831294e-5	4.680961437326375	Up	4.883638147513746
HOTTIP	1.4723225218991995	11.325618995551835	5.348334130172143	1.2141609252854537e-6	1.3084685732268436e-5	4.679597316083568	Up	4.8832367037753945
MAP3K13	0.7891277066254521	9.698058060024492	5.347677810142427	1.2172250252719694e-6	1.3111530768925324e-5	4.677133547941037	Up	4.882346601545009
PPAT	0.8269307144505245	8.666224395143002	5.347374270736033	1.2186447028322946e-6	1.3120645720517678e-5	4.6759941271374865	Up	4.882044791030713
FAM71A	1.604691830125013	8.636368427938843	5.345661944474971	1.2266839532638033e-6	1.3194782400903882e-5	4.669566897380592	Up	4.879597767464844
ZDHHC20	1.0065148503855923	11.342646292370675	5.341866084258814	1.2446917295751084e-6	1.3382190827513584e-5	4.655321956632275	Up	4.87347278145515
LYPLA2	0.9474529448202152	10.581149105465087	5.338820898709178	1.2593260390412347e-6	1.3526817111372964e-5	4.64389695903136	Up	4.868804381790021
GMCL1	1.245369181135362	8.679914213850475	5.336819845088851	1.269034559659986e-6	1.361831223755198e-5	4.636390740237968	Up	4.865876712638854
EXPH5	1.0838217805337864	8.035001619350687	5.335916235150706	1.2734427017136242e-6	1.3659210301221755e-5	4.633001538139649	Up	4.864574408395016
DLAT	0.9042590167605448	9.303426856050834	5.332278748658623	1.2913405613959484e-6	1.382949951013988e-5	4.619360550669085	Up	4.859193536732163
EFCAB4A	1.4500390573418	7.68899650972761	5.331601239783635	1.294701399282679e-6	1.3854758332174184e-5	4.616820216346741	Up	4.858401045191642
ADRBK1	1.181920016850615	11.075380305483227	5.331069998096539	1.2973426834969006e-6	1.3876532611372412e-5	4.614828402173759	Up	4.857719039347354
PYGB	1.1741662210673294	9.545262026733043	5.330817303786665	1.2986009155202203e-6	1.3877015575052373e-5	4.613880988458855	Up	4.857703924273794
C1orf200	1.2641341974997218	10.744467732842404	5.328482702574187	1.3102824305960325e-6	1.398877822193496e-5	4.605128818502981	Up	4.85422021507521
SHISA5	0.9640608550865188	11.226225627484547	5.326469529121446	1.320438580225271e-6	1.4084062599987867e-5	4.5975828500600135	Up	4.851272053271771
SLC25A22	0.9400465136024572	7.728043839408163	5.3239853462531945	1.3330776674473376e-6	1.4199014875943965e-5	4.588272936966399	Up	4.847741785812907
ATAD2	1.6566856422636187	8.657479081931577	5.323211515209674	1.337039034615217e-6	1.4234581699842506e-5	4.585373216073976	Up	4.8466552905907445
DDX49	1.0379584182227326	8.948256050873646	5.3224964076950085	1.34071007831313e-6	1.4267025991500514e-5	4.5826936923814	Up	4.845666547564384
RANGAP1	0.9817910476204492	8.50440070769907	5.320387498499858	1.3515941018930738e-6	1.437616060307375e-5	4.57479238446239	Up	4.842357084157353
N4BP1	1.1340191901845724	12.038290113257991	5.317466204407501	1.366814505946504e-6	1.4517803659029744e-5	4.5638493978759405	Up	4.838099081357198
ELOVL2-AS1	1.1069511668387015	4.9970681685253915	5.317258082634546	1.3679052628558225e-6	1.4522647103887872e-5	4.56306987662967	Up	4.837954215741167
MYT1L	2.0470585027479142	5.765856247162681	5.316077234427591	1.374110262570866e-6	1.4581757280778683e-5	4.55864723002241	Up	4.8361901350470315
HTR3A	1.3123323743703246	7.659679511481269	5.3148856980103	1.3803994815799513e-6	1.464170595227988e-5	4.554184943867802	Up	4.834408319281836
RP11-532F12.5	1.335685421479278	10.558207074978997	5.308091803171917	1.4168038892819876e-6	1.5000025998557425e-5	4.528749427774195	Up	4.823907988209636
DDX21	1.9152906530351697	10.220663644481208	5.307784913207142	1.4184704271203073e-6	1.5010723821501163e-5	4.527600771517984	Up	4.823598365444628
TTTY9A	1.235980345004232	6.851510689521794	5.307296085507448	1.421128942590327e-6	1.5025530514072769e-5	4.525771195871067	Up	4.823170185197641
PMS2P1	0.6665164038589602	9.990341995333443	5.307269223759209	1.42127517357223e-6	1.5025530514072769e-5	4.525670660121462	Up	4.823170185197641
BYSL	1.051342392920394	7.706407202069846	5.305843821535269	1.429056092136751e-6	1.5087851560681458e-5	4.520336079948655	Up	4.821372597319768
MND1	1.8263979984242065	5.857492325094366	5.303429543739588	1.4423307027655602e-6	1.5213962263058206e-5	4.511301914175216	Up	4.817757665310256
MSRB1	1.289056388922793	11.015027668598876	5.301977275454415	1.4503741485864e-6	1.5291755827423154e-5	4.5058683453886355	Up	4.815542645236411
MAGEA11	3.205627888637606	6.17440119621125	5.300882685930501	1.4564657104435082e-6	1.5341841155265664e-5	4.5017733973481056	Up	4.814122518119074
ZNF614	2.5744266706960763	8.008676231882854	5.300547583024995	1.4583356351593947e-6	1.535446893548633e-5	4.500519817055284	Up	4.813765199890161
ABHD1	1.61667827433579	8.271745486304258	5.300100328767189	1.460835059619572e-6	1.5373709902960526e-5	4.498846740644361	Up	4.813221318188836
TNFAIP2	1.3922179078583703	10.25610426738806	5.2981904847871	1.4715554627129678e-6	1.5465189449430405e-5	4.49170307714516	Up	4.810644755496672
SAGE1	1.8843067178918032	6.283476669946609	5.295485381614654	1.4868723320274895e-6	1.5611818304018788e-5	4.481586535381861	Up	4.806546511837446
STX10	1.1145228257350652	9.92920119593264	5.29257737199757	1.503512943791735e-6	1.5765888855263846e-5	4.470713447366115	Up	4.802281539406761
AX747132	1.0783899916117177	7.545982399439366	5.2905766009404225	1.5150682204305217e-6	1.587144954909794e-5	4.463233912306742	Up	4.799383407055745
EPHA1	0.9728205924649096	9.409090113251482	5.290248901140892	1.516969125015101e-6	1.588408998225194e-5	4.462008970488864	Up	4.799037661353508
SDC1	1.9513727725395835	7.768312315857485	5.2897963318131005	1.519598222332492e-6	1.5904340223579634e-5	4.460317315910694	Up	4.798484342476262
SFMBT1	1.3972227317594177	8.818935806310234	5.287154625518237	1.5350342379700733e-6	1.605121038871906e-5	4.450444054178386	Up	4.7944922127717895
LRRC71	2.077260933671198	8.021554648510095	5.285037722748044	1.5475148896518024e-6	1.6166937516138622e-5	4.442533637521316	Up	4.791372240192919
WDR55	1.3446595496557308	10.859162227987529	5.281258981639067	1.5700417088528748e-6	1.6379837782419024e-5	4.428416417101668	Up	4.785690403585926
MVK	0.6703697201655743	10.892440815110064	5.280089390494148	1.5770792859319597e-6	1.6445759791630496e-5	4.4240476880438235	Up	4.78394605737804
PCDH19	1.36106978373215	10.087432084031764	5.2777634463282315	1.5911670648659744e-6	1.6585107643311448e-5	4.415360824232983	Up	4.780281705408022
THUMPD3	0.8551305590705223	8.747267075705343	5.277479439198408	1.592895691523718e-6	1.65955649027191e-5	4.414300227840868	Up	4.780007959889414
HSD17B10	0.8866357957522482	10.923821497345706	5.277357985281867	1.5936354915801098e-6	1.659571525346442e-5	4.413846677215385	Up	4.78000402533198
WDR5B	0.7019705381518664	8.299492843268903	5.27494921349868	1.6083777728994253e-6	1.674161740953865e-5	4.4048523571057965	Up	4.776202587077197
CMTM7	1.5571210445128043	10.195973215978936	5.274500480658896	1.6111389043120226e-6	1.6762731692476017e-5	4.403176976155213	Up	4.7756552063323845
HIST1H2AM	1.1840238056592325	7.251360455568916	5.2728274016237835	1.6214747843863625e-6	1.684728500997983e-5	4.396930900041691	Up	4.7734700769996
PLS1	1.163664680271193	8.391437564579803	5.272114195200109	1.6259005908425244e-6	1.6877939935520016e-5	4.394268540017932	Up	4.772680562996755
GPM6B	1.6387749772973963	9.717956911829074	5.270686136412036	1.6347981388873484e-6	1.6954916871987147e-5	4.38893810868588	Up	4.770704335176711
C9orf156	1.282538981829232	11.171283705749913	5.2697416143706075	1.640709279510378e-6	1.70008096041295e-5	4.3854128640604	Up	4.769530396372678
SYNDIG1	1.606043878703315	8.094024470991819	5.266522243966017	1.6610154680925308e-6	1.720342820031191e-5	4.373399091499542	Up	4.764385000759667
FAM132A	0.8139383633715624	7.186030626675988	5.2653840760691955	1.668253404898275e-6	1.7270574502564542e-5	4.369152477231087	Up	4.762693215464172
CCL11	0.8769831232790528	6.800448141361172	5.265194957964823	1.6694590609580891e-6	1.7275239192971565e-5	4.36844689498245	Up	4.762575930670494
DCXR	0.9210410819960088	9.376586908047525	5.263746819612005	1.6787195887487869e-6	1.735536623180456e-5	4.363044360918017	Up	4.7605662174420855
LOC100131303	1.0385740956763383	7.2326948934762605	5.263434269933041	1.6807248899860556e-6	1.73682496648559e-5	4.361878417754238	Up	4.7602439466189335
ARF1P1	0.8422874750027374	7.328293119125152	5.2624749425210435	1.6868945956653762e-6	1.7424136096716993e-5	4.358299892222965	Up	4.758848745380864
BLM	1.3293595979997963	9.049918319782403	5.2617418265052285	1.691624472042377e-6	1.7465106631704666e-5	4.355565366950208	Up	4.757828758470676
ZNF503-AS1	2.0217959555549463	10.129700475947024	5.261306484404084	1.6944393532666622e-6	1.7479673365935168e-5	4.353941611797638	Up	4.757466687073317
ING4	1.0170732456132772	9.804313306711386	5.2584139043169	1.7132597680837029e-6	1.7648658367396232e-5	4.343154129909611	Up	4.753288303634954
CD6	1.9559302836245616	7.632969794263375	5.25815129707018	1.714978545668439e-6	1.7658413207177417e-5	4.342174890160805	Up	4.753048324899382
HPS6	0.5668651927015969	8.111947525280751	5.257373305724355	1.720080491202082e-6	1.7695018686246597e-5	4.339273943043906	Up	4.7521489744037195
PRKX	1.369716717922678	9.237921123433727	5.254355106935885	1.7400149336133714e-6	1.7884007936271486e-5	4.3280214230834	Up	4.747535146079887
LOC643085	0.9002228281712856	6.281956052180878	5.25384458427269	1.7434091835031556e-6	1.7902809115515574e-5	4.326118337683327	Up	4.747078818872111
ALG3	0.8799526047622432	8.79869731856334	5.253259843673578	1.74730487226948e-6	1.7934763648565916e-5	4.323938680135792	Up	4.746304342255367
SLC25A13	0.9472959886920512	9.975280515851916	5.252562890117309	1.7519593279020103e-6	1.797447419868614e-5	4.321340869380784	Up	4.745343805031261
PSME4	1.327391476182413	9.51813272252437	5.252409676765857	1.752984163108687e-6	1.7976927237903922e-5	4.320769803620219	Up	4.7452845393918
DERA	0.8096862898521966	10.644721244782714	5.250569209806606	1.76534107932924e-6	1.8063165721812917e-5	4.313910432425778	Up	4.743206133588956
GNPNAT1	1.1355102985043786	9.0341377391394	5.249974686868225	1.769350974495325e-6	1.8096102344871944e-5	4.311694868477617	Up	4.74241495620247
CLDN23	2.741433975814367	7.423413301499738	5.249754161424259	1.7708406331862386e-6	1.809775894989929e-5	4.310873078613592	Up	4.742375200597689
MRPL12	0.8613287178328015	9.960573434580937	5.249691718512776	1.7712626615460322e-6	1.809775894989929e-5	4.310640387125134	Up	4.742375200597689
DUOX1	1.5134183948062194	7.527469249478575	5.249538227254701	1.7723004718656995e-6	1.809775894989929e-5	4.310068411666385	Up	4.742375200597689
VPRBP	0.8015232171612343	9.909726978172875	5.248239875043508	1.7811030425909893e-6	1.817567194979449e-5	4.3052304543235165	Up	4.740509524419766
SLX4	1.6580574164840645	8.094210891760442	5.2466555009937705	1.7919030028409938e-6	1.8253316474621147e-5	4.299327368721484	Up	4.738658216370697
EIF2B5	0.6989687296676692	9.406921961805642	5.245735008293364	1.7982071119255388e-6	1.830938162605447e-5	4.295898113273279	Up	4.737326323143814
ZBTB42	1.3601649415930837	8.3053490920508235	5.2449160561305765	1.803834124954996e-6	1.8358505758383164e-5	4.292847347069094	Up	4.736162669937473
LOC100288570	1.2572832946489072	7.433248787235611	5.241439285750588	1.82791625630376e-6	1.857055773888709e-5	4.2798978031066275	Up	4.73117505268006
MORC1	0.9928932146228422	4.044376892087258	5.241186698668961	1.8296780791835756e-6	1.8580206291008003e-5	4.278957155189036	Up	4.730949468461371
GPCPD1	0.9532051778150858	10.70310979412506	5.238100193131772	1.851342032963289e-6	1.874197096113588e-5	4.267464325002439	Up	4.727184739353512
SLC6A10P	0.9340893131643968	8.432884809511688	5.2367246768746405	1.8610776821716012e-6	1.88321965017267e-5	4.2623433729709275	Up	4.725099022896437
BCAN	1.2810385497335872	10.17315816056598	5.236359942048941	1.8636676342684183e-6	1.8850067110710497e-5	4.260985581882024	Up	4.724687099264058
KLK12	0.8361771912409921	8.427245317752678	5.234144817787976	1.8794732855337395e-6	1.900153305334796e-5	4.252740206973484	Up	4.721211358533995
SPATA24	1.2062148993356274	12.558863591487675	5.233922113647303	1.8810696213987144e-6	1.900927202649346e-5	4.2519113118893825	Up	4.721034514430215
FDPSP5	0.9972118937120068	6.859540917593214	5.232225275921333	1.8932763188625455e-6	1.912418052947293e-5	4.245596226283685	Up	4.718417165280377
RP11-308D16.4	0.9865993196175636	6.241580051062028	5.2320534775877015	1.8945165304381448e-6	1.9128262886096345e-5	4.244956894374558	Up	4.718324468197359
DDIAS	0.8598907096817756	7.384744314002342	5.229847849180328	1.9105100360737047e-6	1.9281234722245388e-5	4.236749606324621	Up	4.714865158405804
CC2D1A	0.8707995872780261	8.69985113857094	5.22839981086831	1.921082140378663e-6	1.93708410267622e-5	4.231362125938683	Up	4.71285152304172
UMPS	1.2992680313539822	10.892322154834018	5.227533372371518	1.927435456223548e-6	1.9421171672644185e-5	4.2281387995541815	Up	4.711724572800091
RNF152	1.0976007982102507	5.83366489972788	5.227487641815415	1.9277713566403665e-6	1.9421171672644185e-5	4.227968678679928	Up	4.711724572800091
PODNL1	1.0356631261118068	8.814165669025655	5.227139492223274	1.9303304738286132e-6	1.9438393886762697e-5	4.226673557653828	Up	4.71133962186511
ZNF282	1.000911843066258	8.489016472851207	5.226193998315468	1.937297297269087e-6	1.9499966944223252e-5	4.223156485167306	Up	4.709966124840231
WHSC1	1.290827666533267	8.3119422384617625	5.223994320829285	1.953601235650557e-6	1.965542773546574e-5	4.214975071262791	Up	4.706517500756067
AK056982	0.7678641753388158	7.4931033141231795	5.223770420282709	1.9552683185804876e-6	1.9663553345407904e-5	4.214142381043529	Up	4.7063379992779915
B3GALT6	1.3084654761883954	9.650774359077412	5.222956242861508	1.961342180025906e-6	1.971597000738695e-5	4.2111145630003906	Up	4.705181851180544
SCGB1D1	2.2616281980122013	5.895285216634205	5.22244221377251	1.96518644025316e-6	1.9745937886057115e-5	4.209203055968845	Up	4.704522233461205
ESF1	0.5992212675037969	9.15766737392451	5.220624403974141	1.9788407291135023e-6	1.9874406076114056e-5	4.202443828036771	Up	4.70170584087126
ESRP2	0.8619267153299708	8.314256934340339	5.2196465776693834	1.986224075331247e-6	1.9939807204696626e-5	4.198808338339149	Up	4.700279045138765
CCDC167	0.8708279189837729	7.849748258703243	5.217081060886577	2.005724603654838e-6	2.0103371454628304e-5	4.189271248803034	Up	4.696731102711037
NDUFV3	0.8445331770538242	9.152434606218009	5.216832144323157	2.0076266007597187e-6	2.011054684710228e-5	4.188346024691936	Up	4.69657611988312
LSM4	1.574643287292858	10.20521327482085	5.212429479057358	2.0415621133914857e-6	2.0436606654787215e-5	4.171984279951242	Up	4.6895912138917115
LY86-AS1	1.152188871501174	4.9417194149600725	5.212377836588079	2.0419634954693637e-6	2.0436606654787215e-5	4.171792393181986	Up	4.6895912138917115
FBXL14	0.9416511751730194	9.629819330324471	5.212258483940149	2.0428914397064716e-6	2.0436953759966928e-5	4.171348920193226	Up	4.689583837687502
SYT15	1.0355663457040816	10.81814575714693	5.211297637793391	2.0503769420397588e-6	2.049391614544677e-5	4.167778901111684	Up	4.68837504512004
RCC1	0.9655800492550152	9.07620831409515	5.207870661715009	2.0772949607680013e-6	2.0744841295247097e-5	4.155048185095125	Up	4.683089883315707
ZNF99	1.5905629916374844	4.3627000067765955	5.207738747277353	2.0783380231108567e-06	2.0746202282178578e-5	4.154558210841301	Up	4.683061391908234
FAM181A	1.4860616713192396	6.695379614806774	5.207314474491503	2.0816962851718624e-6	2.077050709895585e-5	4.152982354614637	Up	4.682552900306986
LOC100506274	0.5625788251550672	6.673405819049058	5.206358940504329	2.089279190069207e-6	2.0819084751565065e-5	4.149433453100319	Up	4.681538366856314
KLRG1	1.729119229947896	8.297959061284978	5.205419030280801	2.0967645746846652e-6	2.0876550993060657e-5	4.145942839818793	Up	4.6803412493674506
MEGF10	1.3761690048737003	8.648163997197587	5.204557610411893	2.103647996639797e-6	2.0934911924802923e-5	4.142743949148218	Up	4.679128861887752
PTX3	2.4013150545042077	7.870360788417575	5.203356828934927	2.1132802307184853e-6	2.102162539069923e-5	4.138285198827494	Up	4.677333707388609
ADH7	0.9192725674850708	6.224385689232729	5.202703638384347	2.118538065962109e-6	2.1063842049922104e-5	4.135859944549206	Up	4.6764624105058825
FBXW4	0.9143527796704358	9.900017902495744	5.202600983657577	2.1193655491464086e-6	2.1063842049922104e-5	4.135478805564284	Up	4.6764624105058825
LINC01098	1.2168964629190304	5.575480952344074	5.202087260711076	2.1235113585494677e-6	2.109588205482122e-5	4.133571488863109	Up	4.675802311309214
PCCB	1.3391993207725932	9.462138994756572	5.200596355590033	2.135588305723621e-6	2.1197451126529596e-5	4.128036593088363	Up	4.673716357384151
UBE2Z	0.7748711352723756	9.745801988403342	5.197305377427002	2.162485884857923e-6	2.1450433830894738e-5	4.11582134520592	Up	4.668563919868144
NDC80	1.8254565562996028	8.159679605633048	5.197248850862006	2.162950777913115e-6	2.1450433830894738e-5	4.115611561231028	Up	4.668563919868144
GLTP	0.7965275232657607	10.637743211992175	5.19520646899615	2.179813999333527e-6	2.1608303505525027e-5	4.10803241078401	Up	4.665379328772056
ERVH-1	1.3434247837650748	11.878900758151566	5.194900175941103	2.182354060772438e-6	2.1624113710009794e-5	4.106895882417956	Up	4.665061683573669
UGT8	1.7386199750569702	6.860118576913334	5.193880231933024	2.1908333406412362e-06	2.1689344872579332e-5	4.103111486164326	Up	4.663753565667717
SLC28A1	0.7840911139815088	6.0471588744967395	5.193457632198785	2.194356085727434e-6	2.1714823912352063e-5	4.101543563555652	Up	4.663243688024243
NDUFB7	1.255543309639691	8.124212011166355	5.193293517059385	2.195725630638528e-6	2.171612890841735e-5	4.100934680441012	Up	4.66321758900714
MAZ	0.8032892835395185	8.22509356113572	5.191335334908554	2.212131611194406e-6	2.1862358156594733e-5	4.093670246918168	Up	4.660302995215178
LINC01128	0.7296351567081807	8.9828223138471035	5.1875650804915905	2.244059161499954e-6	2.215520484765556e-5	4.07968660250181	Up	4.654524230114646
APOA1	1.5662082812413924	9.3043	5.187493668042463	2.244668247601101e-6	2.215520484765556e-5	4.0794217785847176	Up	4.654524230114646
C6	1.5251236756946571	8.753181263858442	5.18724662421346	2.246776569132654e-6	2.216645154169297e-5	4.078505659826425	Up	4.654303824215461
S100A16	0.9188631211721175	11.637525644443857	5.186777348787934	2.250786816269261e-6	2.2196444641993284e-5	4.076765483810436	Up	4.653716583928608
PUS7	1.228048115193964	8.764151076718122	5.18311666768592	2.282311791524893e-6	2.2497635277164165e-5	4.0631931130142425	Up	4.647863128113087
CD82	1.2002922848332194	7.850327720629179	5.182586235319092	2.2869155751865793e-6	2.252360802612731e-5	4.061226806764014	Up	4.6473620392057935
COMTD1	0.8745388932843117	9.256118412497967	5.1807378915819955	2.303029273209129e-6	2.2662798598602863e-5	4.054375670787992	Up	4.644686460717892
HBEGF	1.4167538088999336	7.634908714307484	5.179582618420755	2.313157404633851e-6	2.2752677670085075e-5	4.050094009077982	Up	4.64296748564813
HIST1H2BD	1.0302590066676096	9.863772254669332	5.177128768491587	2.3348153120161526e-6	2.2945979176811663e-5	4.041000889514772	Up	4.63929340486788
MGLL	0.934107537243806	10.08796581172624	5.176644744867617	2.339110799177762e-6	2.2978323733099185e-5	4.039207476450829	Up	4.63868165624034
KIAA1217	1.0614023350747903	9.35520629901231	5.175607806820498	2.3483392817323744e-6	2.305907915311373e-5	4.035365629248333	Up	4.63715803991671
TACSTD2	1.8056800255749756	11.538411826729693	5.175480820062655	2.3494718853766316e-6	2.3060303417216624e-5	4.03489516629132	Up	4.63713498275008
ZNF501	0.7002094305057103	7.874567110237124	5.1719173717419125	2.3814741362712036e-6	2.335437066598751e-5	4.0216951913566605	Up	4.631631831222331
C12orf73	0.9638970914243769	8.88526049984167	5.17139560353605	2.386195756950943e-6	2.3390648124798898e-5	4.019762738309152	Up	4.630957744282167
SIRT3	0.9682378364451214	10.409978174587955	5.169642806359026	2.40212468601798e-6	2.3536706934220712e-5	4.013271564163033	Up	4.628254300215612
LOC100133445	0.5365166263028716	7.82021799026612	5.167671955975184	2.420159922692764e-6	2.368473665841498e-5	4.005973962825014	Up	4.625531439664462
TRIM47	1.0354600826937936	9.209756079278757	5.167652562325464	2.420338052684742e-6	2.368473665841498e-5	4.005902158402205	Up	4.625531439664462
PLAA	1.696613326530472	8.669209482181403	5.163346050207919	2.4602136574188536e-6	2.404409580012215e-5	3.989960205278403	Up	4.61899155031823
CEP70	1.1262182121397526	9.272202519912934	5.1620193504847345	2.472627502802971e-6	2.4144790711322737e-5	3.9850501126972384	Up	4.617176554741232
SIGMAR1	1.0508793608199412	9.573793068468827	5.1556653065772995	2.532939535595208e-6	2.4712632680120584e-5	3.961541217393069	Up	4.607080985980161
TROAP	1.5244061061470413	8.909768406116049	5.15361688998858	2.552688989607275e-6	2.48734971862116e-5	3.953965002448096	Up	4.604263149112956
EDN2	0.6768367418100683	7.728539182704943	5.151044981168746	2.5776997390149344e-6	2.510021196362082e-5	3.944454400271741	Up	4.600322611019273
HMGB1P4	0.7950552755579636	9.171687495789392	5.148451006443517	2.6031686674656804e-6	2.5333005505294472e-5	3.9348642176840807	Up	4.59631328249793
LOC102724842	1.8227000385585883	6.967514558052956	5.1478005530340845	2.609593775907092e-6	2.538473469344318e-5	3.932459744619172	Up	4.5954273712302545
BEND3	1.083744905598972	8.104302065597299	5.1468831141282525	2.6186826053941832e-6	2.5451503538153577e-5	3.9290685469274154	Up	4.594286556783575
ANAPC1	1.069824131814448	10.224635513087405	5.146624560074179	2.6212496404230253e-6	2.546563504171482e-5	3.9281128801860374	Up	4.594045489263035
SNTB1	1.3964881381632512	7.513064685498521	5.14615306947724	2.625937160481281e-6	2.5500346474809516e-5	3.9263702099306217	Up	4.593453918739549
ASL	1.0178152339961288	8.105376838356339	5.1444517541716355	2.642920001045578e-6	2.5654377048757652e-5	3.920082558352276	Up	4.590838526616539
TTF2	1.18441	8.678783218445725	5.14277496005739	2.659763530708846e-6	2.5774133764967257e-5	3.913886386409204	Up	4.5888159218704985
LINC01181	0.5980837389209048	6.252111570919389	5.141513652904218	2.6725028483468655e-6	2.5878353331669877e-5	3.909226102228412	Up	4.587063361763822
RNF167	0.9341138156575096	9.23412552775384	5.141486211967631	2.6727806688551037e-6	2.5878353331669877e-5	3.909124718660336	Up	4.587063361763822
MYEF2	0.7109070375431283	9.272160970951935	5.137197123916014	2.7165549795614132e-6	2.629105811226124e-5	3.893281010944764	Up	4.580191934887591
UNC5B	0.5902897279160957	9.291386871878537	5.136706896170428	2.7216028144944074e-6	2.6328774119584582e-5	3.891470485425102	Up	4.579569361383637
CHCHD10	1.208009976888004	8.610904753247201	5.135312296492699	2.7360132880046257e-6	2.6456994089711676e-5	3.886320301664417	Up	4.5774594996952995
PADI2	0.9930943620319664	7.66998500952628	5.134147763934996	2.748103813001876e-6	2.655146416286737e-5	3.8820201957373	Up	4.57591152504123
LOC100507336	0.5978270572807327	5.330986192713605	5.133204165233021	2.7579389778410022e-06	2.662400247849126e-5	3.8785362031113495	Up	4.5747266549598695
TMEM62	0.6884807984056849	8.734929733601154	5.1312527492145215	2.778388370821989e-6	2.681010018390396e-5	3.8713319651928666	Up	4.571701563143739
LOC102725382	0.7773323739850877	6.32069328573599	5.131128165044918	2.7796989616320697e-6	2.6811438677563287e-5	3.870872064632155	Up	4.571679881542547
GJA9-MYCBP	1.137938692463635	10.32426566153921	5.129951362224951	2.7921085676866627e-6	2.690844647013612e-5	3.866528147776056	Up	4.570111375031608
ZW10	0.5956417038409256	8.549678670633263	5.128109094116205	2.8116448802342568e-6	2.7045808646713575e-5	3.8597286534894986	Up	4.567900028991549
SMC4	1.5300713383889768	10.35162280603773	5.128050133665894	2.8122723357896586e-6	2.7045808646713575e-5	3.859511057679351	Up	4.567900028991549
RABIF	1.1217101615339384	9.418832415415029	5.127635102604185	2.816692974788287e-6	2.70769405757064e-5	3.8579793995242033	Up	4.567400408160826
PLCD3	1.4182959521927572	11.091118328671984	5.125802294535531	2.8362965277482093e-6	2.722563657718617e-5	3.8512161104356126	Up	4.565021956981657
LOC100130093	0.7264471388293217	10.479233815023896	5.12567755947101	2.837635537980967e-6	2.722563657718617e-5	3.850755859773853	Up	4.565021956981657
CLDN16	1.0144640262254745	7.900859589359761	5.125633275068264	2.8381110728873207e-6	2.722563657718617e-5	3.8505924591817737	Up	4.565021956981657
HN1	1.1682874259470983	8.7520666679090091	5.123659867087617	2.859381496737656e-6	2.7406698476690757e-5	3.8433115852646464	Up	4.562143278204184
CCDC86	0.9976370250065756	8.922446731461916	5.122598548890841	2.8708855424938073e-6	2.748242273084344e-5	3.839396350981393	Up	4.560944984412439
BC045805	0.96869992961443	6.311293747923782	5.120788089813093	2.8906147201667557e-6	2.7659713167166544e-5	3.832718307389338	Up	4.558152327862381
AP1M2	0.8456090457793977	8.960791675630162	5.115484880373888	2.9491742769205185e-6	2.8172926213638637e-5	3.8131627012811817	Up	4.550168042171653
LOC102659288	2.981806326281176	7.491525075622671	5.11301432021125	2.9768508144530935e-6	2.8413587727940064e-5	3.804055440814696	Up	4.546473925303049
HPDL	1.1863414460788846	6.3321594188872385	5.110482886342792	3.0054735802796184e-6	2.865092918467391e-5	3.794725722404894	Up	4.542861288766998
ABT1	0.6028426828713531	8.655674129898296	5.1073820182020215	3.0409030247690004e-6	2.8964538011527875e-5	3.783300008913917	Up	4.538133394168005
AAR2	1.1560987361312112	10.39318474721575	5.106900419679205	3.0464422373330775e-6	2.9005223448998532e-5	3.78152573661107	Up	4.537523784487257
CDH6	1.682360692495191	10.529803708871622	5.102594922649042	3.096404704486008e-6	2.946865359148726e-5	3.765666891190773	Up	4.530639706401363
RP11-225H22.4	1.688396253137074	7.545664663482904	5.101691017527373	3.106995569069229e-6	2.9557152442717207e-5	3.762338177099702	Up	4.52933740850401
TMEM223	0.7760251533147695	9.447478746169368	5.100407036250814	3.1221008183827555e-6	2.968850566241856e-5	3.757610230654316	Up	4.527411661578706
RP11-295G20.2	0.8872485136341517	7.783827433855155	5.094994071982538	3.18657689791225e-6	3.0276450517996e-5	3.737683912882555	Up	4.518895041021538
GMPS	0.9758165776634372	9.329638639107724	5.093167679128818	3.208625118677219e-6	3.0473281066922413e-5	3.730962601366195	Up	4.516080782648214
EIF2S1	0.981010957988401	10.813173488712424	5.093003945437087	3.21060900521157e-6	3.047947030300229e-5	3.7303600951626974	Up	4.5159925847892
BC027619	0.7941416378914719	7.537099180760838	5.092785416534291	3.213258694936141e-6	3.0491972493340512e-5	3.7295559668235105	Up	4.51581448067676
DOLPP1	0.5173248495162985	8.010647481011336	5.087027610210973	3.283850744677431e-6	3.1123123938473464e-5	3.7083741021743544	Up	4.506916817815071
MFGE8	1.1881962174582954	7.673852099585876	5.086364088476012	3.2920827745377217e-6	3.118822434726647e-5	3.7059337941717656	Up	4.506009350415534
MARVELD2	0.8538155962927121	9.45646055227022	5.08571332449355	3.300176182556735e-6	3.125195814599153e-5	3.703540539650775	Up	4.505122765988505
FAM198A	0.7055322027695698	5.967452857159922	5.085019394380614	3.308827937257364e-6	3.13209244420816e-5	3.7009886820523734	Up	4.504165428154007
GDPD2	0.8194251650134579	8.736214965064155	5.079905088833244	3.3732816314313942e-6	3.1878277755274213e-5	3.682185963255976	Up	4.4965051496844914
FGF18	1.392153751003976	9.769105488265136	5.078643485433911	3.389369528103222e-6	3.201680608079955e-5	3.6775489374373103	Up	4.494621994423873
BAIAP2	1.187282541393695	8.116315034421293	5.0771472689857875	3.4085467496374966e-6	3.2158408694827336e-5	3.672050234350355	Up	4.492705449729372
SNX11	1.1111712060300505	11.04936405911011	5.075830660428396	3.4255098956887797e-6	3.2305128154766526e-5	3.6672121810775655	Up	4.490728531769841
CALCA	0.5346731551236656	7.186774264536075	5.074385196606705	3.444228549500816e-6	3.2468275642368835e-5	3.661901255430815	Up	4.488540775706915
HAUS5	1.1426161112631448	11.106374438254957	5.0739059576721735	3.4504567724853102e-6	3.251359163825841e-5	3.6601405790269146	Up	4.487935053188597
ZNF560	1.4881217228232089	4.525415843530675	5.073765419992689	3.4522853033974195e-6	3.251742917102905e-5	3.659624271117674	Up	4.487883797056136
ITPRIPL1	0.832487836934237	7.081946833751754	5.073584572544851	3.4546397015026025e-6	3.2526214703982735e-5	3.658959882099228	Up	4.487766475569262
DBN1	1.0691289777349855	9.122043343503208	5.073435145193089	3.4565862387953312e-6	3.253115448679489e-5	3.658410930496216	Up	4.487700523919266
HLCS	0.8764418194779449	7.3884514456592045	5.072364286327059	3.47056744512363e-6	3.264930615829916e-5	3.654477118153753	Up	4.486126043633129
LINC00919	1.0128980805710368	6.814204205050677	5.070605776456388	3.493647061621802e-6	3.285291866948015e-5	3.6480179902584857	Up	4.483426041454501
TBC1D31	1.060464770020528	7.53413527925811	5.070147505256236	3.499686334880486e-6	3.289618884787619e-5	3.646334887569931	Up	4.482854413849779
OR7E14P	1.220034171791263	7.019426197169215	5.069402160582191	3.5095306434566163e-6	3.296163858441869e-5	3.643597584313055	Up	4.4819912068510535
FLAD1	1.1212237777979317	9.481999880051118	5.069079687355118	3.513798192020449e-6	3.298817760986288e-5	3.642413344528747	Up	4.481641675841181
SEC31B	0.7009943766057622	7.750510477664321	5.0679913092786695	3.5282391799850107e-6	3.3096590487444466e-5	3.638416662241048	Up	4.480216743648951
SAC3D1	1.3685657307198458	10.295562708070758	5.067321063482482	3.537161176453273e-6	3.316668465412887e-5	3.635955607126438	Up	4.479297938440666
CEBPG	1.1130980357204765	8.820705208586432	5.066582287053876	3.5470210519744596e-6	3.3245511941058445e-5	3.633243079688648	Up	4.478266975046328
LRRC27	1.0714544078756305	8.738400731051584	5.0661064472622	3.553385979874856e-6	3.329153064437217e-5	3.631496053835117	Up	4.477666236831235
RP11-44F14.8	2.7588691711856157	8.5870186011002545	5.06406017534587	3.5808851883326133e-6	3.353543684971832e-5	3.6239840621373807	Up	4.474496031944878
SHARPIN	1.1071142594466554	9.371892376968354	5.063775399766536	3.584728700886758e-6	3.3557695559569615e-5	3.6229387374618662	Up	4.474207870254695
DPH1	0.8053545413755456	8.62484818302014	5.062249739360339	3.6053889699415584e-6	3.373729825901551e-5	3.617338935314735	Up	4.471889699404921
ATHL1	1.0685011647140712	8.035464961293851	5.0609095564273074	3.6236338187179608e-6	3.389416113591506e-5	3.612420515568664	Up	4.469875110199779
RRN3P3	0.8836497045266505	6.9306222117845895	5.059778879516576	3.63909689224616e-6	3.4024886717490766e-5	3.608271414245782	Up	4.468203312062925
GUCY1B3	1.4395572952953426	9.976104264950903	5.059315654245291	3.6454505999182656e-6	3.407036939359886e-5	3.606571691532776	Up	4.467623157751994
IFT52	0.8910664974069498	10.166862242424	5.054577550890185	3.7110673217209994e-6	3.466946069973653e-5	3.5891899460870595	Up	4.460052913952204
PMPCA	1.0842087345519236	10.038327674965732	5.052338031604271	3.7424834574188305e-6	3.4933070506355134e-5	3.5809767276129554	Up	4.456763239573931
TGFA	1.1475954494261202	9.129625714340062	5.049812926189457	3.7782185896255144e-6	3.523924301347009e-5	3.5717180500974015	Up	4.4529734293917675
PPAP2B	1.2629946379670614	10.128440700146024	5.049023355292055	3.789461040683125e-6	3.531530718932351e-5	3.5688233837748102	Up	4.452037011696606
GTF2IRD2	1.091070795160741	9.777946520925395	5.047986749280588	3.8042707483474126e-6	3.5438888620293345e-5	3.565023355083988	Up	4.450519906244415
CACNA1A	1.2836340312131431	7.551937364638437	5.047401052948764	3.812663501883328e-6	3.550261630426889e-5	3.562876438158471	Up	4.449739641180425
LOC101927362	0.5928938679937659	7.352652318431546	5.046556442695235	3.824798338353033e-6	3.559512565121576e-5	3.5597806427217344	Up	4.448609469659601
TNIP3	0.6586375795693753	5.11270385370141	5.046493110774365	3.8257097764910855e-6	3.559512565121576e-5	3.559548517928019	Up	4.448609469659601
MEPCE	0.7512445359805504	9.527324020621064	5.0447474596962	3.850916207218539e-6	3.5785991837917526e-5	3.553150840303224	Up	4.446286941457858
FAM90A1	1.081393923842333	7.504924877270435	5.04322432859335	3.873042486736609e-6	3.597286039477661e-5	3.5475694705332588	Up	4.444025027728413
TES	1.0861649870677876	10.72110170315613	5.043146963543964	3.874169675804431e-6	3.597286039477661e-5	3.5472859932692495	Up	4.444025027728413
LSM12	0.7869456275168769	10.689985539749074	5.039799744935048	3.923246930205414e-6	3.6413779519744285e-5	3.5350230964426723	Up	4.438734241709245
DNAH6	1.2630999651401034	9.415396012844624	5.038228836367288	3.9464893560606986e-6	3.661465124789648e-5	3.5292691304942823	Up	4.436345098133314
RASD2	0.7106474934962117	6.740646568321343	5.036505110474486	3.9721481015728115e-6	3.6822842956193015e-5	3.522956324206171	Up	4.433882684258861
XXYLT1	0.8814916990055686	7.466825015620169	5.034008225119536	4.00960601725047e-6	3.712495996304068e-5	3.51381365110493	Up	4.430334006034054
PCDH7	2.213395050399365	8.322463336672419	5.033812562907904	4.012555898420726e-6	3.7137243689307354e-5	3.513097292173504	Up	4.43019033255492
GPN1	0.7611244752097885	10.321109690166844	5.033052843783721	4.024029902436141e-6	3.722837854340334e-5	3.5103159224674885	Up	4.429125878769188
NIPAL2	1.526665582772063	8.606075799210311	5.032896343112033	4.0263975164453e-6	3.723522586044947e-5	3.509742988536906	Up	4.4290460074806255
ZNF250	0.7256268567696385	8.659747202205574	5.030768215862075	4.05872863461451e-6	3.751905148741227e-5	3.5019528943646643	Up	4.425748149477137
PCDH1	0.6646215308961363	7.359954450574567	5.030091096604506	4.069068880002791e-6	3.75994454384426e-5	3.499474575527183	Up	4.4248185605191575
HECW1	0.7302179437220193	7.596916818366405	5.02781761361962	4.103976319213723e-6	3.789139394967343e-5	3.491154489550156	Up	4.421459417593425
MYO3B	0.970012918778119	5.827060730577255	5.027074220664327	4.115454043069864e-6	3.796672300459492e-5	3.488434311425224	Up	4.4205968862007055
TOX4	0.9491341218959874	10.01994109742915	5.024063798798705	4.162256392633023e-6	3.83520998820181e-5	3.477420566688638	Up	4.416210852257208
SCAF11	1.7405303454247782	10.848931228480938	5.023640020562001	4.1688865189512794e-6	3.839772732169337e-5	3.4758703905265387	Up	4.415694479821445
ARFIP1	1.3633319235154815	10.548052434772156	5.022269533838341	4.190399093927334e-6	3.8564819336268495e-5	3.470857558869178	Up	4.413808698826169
LOC101929683	1.4162135346582776	7.6032423928860045	5.022049383660274	4.193864924549191e-6	3.8581196465123015e-5	3.470052371281663	Up	4.413624308311016
PVRL4	0.817808782205101	7.479469900921029	5.020202453171445	4.2230520573916955e-6	3.883408682518674e-5	3.4632979330259035	Up	4.410786902726396
KIAA0125	2.1240951124604797	7.826988993860045	5.01880283158839	4.24530283305873e-6	3.90230146715752e-5	3.4581800838842183	Up	4.40867918279757
CORO1B	0.7013413564715307	9.20164189684648	5.015942855630108	4.291127702528154e-6	3.942839787395247e-5	3.4477242660624112	Up	4.404190869607932
TSPAN17	1.0823110552243556	8.88512375379732	5.01524668574822	4.302355449975547e-6	3.951569262946228e-5	3.445179528615383	Up	4.4032304013619274
NSMCE2	0.8757149413993606	10.005054579330167	5.014975021691902	4.306744620408208e-6	3.954013249210249e-5	3.4441865464572397	Up	4.402961879774684
KCTD1	1.3427681646468983	9.67710670827312	5.014755697371102	4.310291358869743e-6	3.9556821500032434e-5	3.4433848929864608	Up	4.402778612435193
BRPF1	1.0242654299841494	10.342238435540246	5.014500882517802	4.3144156162906175e-6	3.9578795062194486e-5	3.4424535373133596	Up	4.402537431600202
LOC101060264	1.1279735432600797	5.822651972839424	5.013343075876371	4.333203827936355e-6	3.971929903019065e-5	3.43822198356314	Up	4.400998424577624
ZC3H8	0.8036138062996061	8.615291612538334	5.011717272713603	4.359721804605383e-6	3.994636570587367e-5	3.4322807235961443	Up	4.398522726379559
HNRNPA3	0.9259923102172536	12.008683074370888	5.0111881188120435	4.368386920882622e-6	4.0009737535177546e-5	3.4303471916275017	Up	4.397834297593708
DIAPH2-AS1	2.072940267296177	7.170462400156041	5.009087650287445	4.402949715178129e-6	4.029403461342416e-5	3.4226729552411355	Up	4.394759244832521
RNF175	1.0563048286087111	6.996024326063389	5.004606723563704	4.477580370470076e-6	4.0921369951388415e-5	3.4063062738593333	Up	4.388049835556911
ABHD17B	0.8139049736069826	10.15997040881236	5.004542834481296	4.478653365893465e-6	4.0921369951388415e-5	3.406072964495606	Up	4.388049835556911
ZDHHC12	1.2735422563836387	9.499931892305804	5.004382166859217	4.481352837469448e-6	4.092968924888762e-5	3.4054862462836057	Up	4.387961552642921
LONRF3	2.0652952468198	8.862498516930112	5.002981172027935	4.504959432719949e-6	4.112887743862718e-5	3.4003705151022077	Up	4.385853143854863
LOC100652911	1.0932559267288502	8.624837269545486	4.999462198619487	4.564792338910478e-6	4.160871869399714e-5	3.387523788015902	Up	4.380815657739725
HK2	1.460516013860909	9.195426029654724	4.998348057128018	4.583897776793235e-6	4.176622749313119e-5	3.383457224056744	Up	4.379174750325173
BCL7C	0.6884985046906102	8.374356403528886	4.997509603017947	4.598327330583247e-6	4.1864357738326346e-5	3.3803971713720253	Up	4.37815556712953
PLEKHG4B	0.9243211687609224	6.322828022385132	4.997373076575996	4.600681120257104e-6	4.186912623323878e-5	3.3798989210717254	Up	4.378106102305389
STX6	0.7705409424227128	10.3831838330216	4.997180338118438	4.604006044923181e-6	4.188272536850794e-5	3.37919553652491	Up	4.377965065914073
TMPRSS3	1.011362177581809	9.618244699362307	4.995911017441367	4.625961928125183e-6	4.206573249347221e-5	3.3745635468907915	Up	4.37607154428306
SLC22A25	0.539916309934247	8.07891915925921	4.993722392937179	4.664060474835533e-6	4.239532761373149e-5	3.3665780730195154	Up	4.372682004336234
LOC100996681	1.5730550523986473	8.353675217987107	4.993522364442131	4.667557767590264e-6	4.241026773816427e-5	3.365848321286868	Up	4.372528985808616
WDFY3	0.7275674518713142	8.490052503187528	4.99333145819565	4.670897962964382e-6	4.2423769152307305e-5	3.365151861819249	Up	4.372390749083721
PIF1	0.5778973647199468	6.762482850395452	4.99124519557782	4.707553259913801e-6	4.273972660062216e-5	3.3575415819205814	Up	4.369168260277259
TMEM144	0.7893384544623325	8.328670195721505	4.98907122259966	4.7460493924215204e-06	4.3072139646652894e-5	3.349612857800296	Up	4.36580355373882
C11orf83	1.6210610194687778	9.42622617836673	4.9880434548627814	4.7643560137666614e-6	4.320400366189752e-5	3.345865008755699	Up	4.364476005784573
PREX2	2.3460652102594013	7.747007515469437	4.987272818127605	4.778127969391777e-6	4.331172338023552e-5	3.343055037127282	Up	4.363394535281108
CIB1	1.6500816307943946	9.978518781756918	4.985754048538964	4.805383963182448e-6	4.354153651233712e-5	3.33751771629798	Up	4.361096249455345
KDM2A	0.6590249911364001	11.269365698644062	4.985177231634963	4.8157754307536795e-6	4.3618418875777286e-5	3.335414881863108	Up	4.360330081214233
LINC00263	0.8227990831885545	8.915318561116452	4.983838139336343	4.839984369586634e-6	4.3803007275226497e-5	3.3305335269518723	Up	4.358496072185341
MANEAL	0.8157100067222771	7.169060861779158	4.980431058979166	4.902118413266121e-6	4.432167415141377e-5	3.318116433904282	Up	4.353383843473921
LOC101060179	0.7355490020372297	7.654229211430694	4.980294609775052	4.904623004765875e-6	4.432167415141377e-5	3.3176192242217324	Up	4.353383843473921
EIF2AK2	0.8082018229150858	10.84342892532171	4.980271734906709	4.905043006747657e-6	4.432167415141377e-5	3.31753587067771	Up	4.353383843473921
ZNF639	0.6805918210612276	9.633006206885703	4.980026958670075	4.90953951185772e-6	4.4344790561307845e-5	3.316643943278069	Up	4.353157391917103
PHLDB1	1.66120374144373	8.320002694290293	4.979228440453774	4.924236264526681e-6	4.4459984805093115e-5	3.31373440048018	Up	4.352030690064049
EPN2	0.6694150909298635	8.138791347108285	4.978507062507647	4.937550288448499e-6	4.4562608697993375e-5	3.311106111251367	Up	4.351029393463108
VAV3	1.2002626724210526	9.887252443014663	4.977310062235124	4.959720405204539e-6	4.472622259556853e-5	3.3067453016081485	Up	4.34943777911717
CYFIP2	0.8380264589661799	9.73288661500232	4.977287670317709	4.960136062350229e-6	4.472622259556853e-5	3.3066637297466626	Up	4.34943777911717
ASS1	1.5854647606028376	11.367092271304148	4.97721186557154	4.9615434655165405e-6	4.472622259556853e-5	3.30638758068561	Up	4.34943777911717
COL9A1	1.892363123740136	7.51503427175214	4.976332271006985	4.9779027857867704e-6	4.485602120362958e-5	3.303183443794981	Up	4.348179251616688
RAD50	0.8299064821479938	9.129572952239691	4.975732254164557	4.989092619437902e-6	4.493915355910227e-5	3.300997882061176	Up	4.347375111891814
H2BFS	1.0168854952357167	8.342790166051646	4.973565947544104	5.02969790306752e-6	4.52692597656498e-5	3.29310809072268	Up	4.34419660694769
EGFLAM	0.7452773824546481	8.497905446175555	4.97281193131977	5.0439069841151465e-6	4.5379295277062696e-5	3.2903622889101625	Up	4.343142252824362
PRPF38A	1.1490487613894071	9.4500068235210275	4.9723839354622115	5.05198984672026e-6	4.5434149254368256e-5	3.2888037956126306	Up	4.34261759961526
EPHB3	0.9928184121635192	9.955151616337687	4.971629930056914	5.0662603912155e-6	4.5544586047394664e-5	3.286058325621318	Up	4.341563240853102
NPIPB15	0.635207346987511	8.317414473191148	4.9696550545791665	5.103824873583331e-6	4.586426130507189e-5	3.2788683316782565	Up	4.33852559689561
PI4K2B	0.8686185174593675	8.86814912612155	4.967115837286144	5.1525248240777674e-6	4.620955734188784e-5	3.2696256031806916	Up	4.33526819172575
OR2H4P	1.8157751525052832	7.585445968311306	4.967037508839777	5.15403430702505e-6	4.620955734188784e-5	3.269340522038088	Up	4.33526819172575
NRTN	2.090302785047621	5.744286627745962	4.967020185208339	5.1543682126184616e-6	4.620955734188784e-5	3.2692774719008204	Up	4.33526819172575
PCYT2	0.7686978769823911	7.630500160361474	4.96633345957032	5.167621632998994e-6	4.6310229275904417e-5	3.266778182530744	Up	4.334323068865454
RSAD2	1.1465245261833026	8.343924071736284	4.96540592727365	5.185575474740629e-6	4.645292924298781e-5	3.263402740734251	Up	4.332986894932881
LIMS3-LOC440895	1.9822391388694012	7.674545769969932	4.96529524725796	5.187721934887381e-6	4.645396874688391e-5	3.262999976959841	Up	4.332977176584388
LOC101926907	1.2955345617750478	8.10315367557614	4.965183318526252	5.189893496658756e-6	4.645523212443493e-5	3.2625926732186032	Up	4.332965365528134
AQP6	0.7540473238136558	7.57822478211222	4.964546222482071	5.202270944753564e-6	4.654781264959593e-5	3.260274387248086	Up	4.332100722341715
ARID4B	1.2499662306815669	10.575945540447382	4.963291835803409	5.226725605097853e-6	4.673795823271929e-5	3.255710274640424	Up	4.330330263865735
C2orf88	1.4008557892815148	9.263903259077525	4.9582904996544865	5.325352221700262e-6	4.750048088899816e-5	3.2375179650169477	Up	4.323301993609215
GPATCH2	0.7344280172804876	8.140910441149186	4.953784905418356	5.415761476838087e-6	4.826926639212255e-5	3.221135985645783	Up	4.316329301642757
GSG2	1.7523963294846243	8.208265161040472	4.9531421184962525	5.428781521804434e-6	4.8366469017664974e-5	3.2187994113360636	Up	4.315455617017547
PPP1R15B	1.0863160976626265	11.146162658285888	4.952860413922029	5.434497275277891e-6	4.8398545411087137e-5	3.2177754391074993	Up	4.315167690616562
HIST1H3A	1.3684067904749924	7.423788569961445	4.9522064608715635	5.447788631422451e-6	4.8498037392340176e-5	3.2153984765702637	Up	4.314275835973467
ALMS1-IT1	0.6510187016800888	7.000149537120442	4.95109724421244	5.47040586242077e-6	4.8657217923015074e-5	3.211367063935751	Up	4.312852726379798
GCNT7	0.8020933448334864	7.326706507080659	4.951016807820673	5.472049552686647e-6	4.8657217923015074e-5	3.2110747362860836	Up	4.312852726379798
IKBKG	1.0781518854921188	10.525416949783404	4.950548231784993	5.481634361425869e-6	4.8723509151150915e-5	3.209371846603033	Up	4.312261440611246
SPATA32	1.1900627985825576	10.605268906969432	4.949283525360173	5.5075862883252715e-6	4.893517153032772e-5	3.204776039151297	Up	4.310378885028906
CELSR2	1.0247042146309493	9.254150641748028	4.948655825876426	5.520511384041403e-6	4.901194410379637e-5	3.202495243576446	Up	4.309698070456039
TRIM29	0.8985535327468455	9.04079654315684	4.9470111832724655	5.5545175707908585e-6	4.929186500305296e-5	3.196519925112354	Up	4.307224749603206
FAM72A	1.4851517809826271	8.87683075580227	4.946922866424103	5.55634948393171e-6	4.929186500305296e-5	3.1961990775859617	Up	4.307224749603206
SLC5A6	1.4271098608367403	10.394297493372846	4.944787162459454	5.600829877129899e-6	4.9625078033122654e-5	3.188441037411665	Up	4.304298797320457
CX3CL1	1.317614046361923	7.927817401337979	4.944703160241557	5.602586501138853e-6	4.9625078033122654e-5	3.1881359265797338	Up	4.304298797320457
WDR83	0.6256069564858686	7.470474612566008	4.944018612032418	5.61692164621551e-6	4.973279812065196e-5	3.1856496145241957	Up	4.303357105332977
ABCB6	0.7272772047823928	8.533362996961975	4.943597571249203	5.625756501765019e-6	4.9791753579838245e-5	3.1841204515223067	Up	4.302842578351241
HIST1H2BE	0.9673453871763708	8.324448401085057	4.942750747700365	5.643566929847545e-6	4.991077224119907e-5	3.1810450818458653	Up	4.301805710488579
RPL7AP10	0.8962116941401241	11.173559430976416	4.937816497562442	5.7484473780441325e-6	5.078629042561991e-5	3.163130343961904	Up	4.294253508110954
LAMP3	1.6974095808923408	9.360617034735531	4.9377802974903835	5.749223838557435e-6	5.078629042561991e-5	3.162998942664798	Up	4.294253508110954
PGM2L1	1.6710831551247145	8.411575356383464	4.937371569267743	5.757997835014033e-6	5.0844165367536115e-5	3.1615153455964213	Up	4.293758877432865
PRKCD	1.0695053404785655	7.086898559476063	4.936778693681954	5.7707481446317085e-6	5.091194589323213e-5	3.1593634315626256	Up	4.2931803035805585
TFAP2A	2.076739787920305	8.156945870400452	4.9367043160672734	5.7723496502051735e-6	5.091194589323213e-5	3.159093477244702	Up	4.2931803035805585
GPR135	1.6184741777567655	7.280890952582943	4.93435407019944	5.823180031661821e-6	5.132069951632928e-5	3.150564186742767	Up	4.289707432694393
CTRC	0.8185125353554197	7.0906686160387435	4.933735296176403	5.836635377874784e-6	5.14194766308807e-5	3.1483188972169236	Up	4.288872348103062
MAPKAPK3	1.210811908467825	10.496776550266205	4.931593075219625	5.883453800438344e-6	5.1811985950819424e-5	3.140546601512713	Up	4.285569760908161
WDR77	1.48537206591417	10.6271865344055	4.93147286231317	5.886091928200677e-6	5.181527403820827e-5	3.1401104967089504	Up	4.285542200627022
CSK	1.4294348080364705	10.932814090021129	4.92963	5.926634405365663e-6	5.21320525030223e-5	3.133433040828856	Up	4.282895176028498
ATP4B	0.6733252430735952	7.043009801875411	4.928592841355493	5.949642596927617e-6	5.229422703615326e-5	3.1296638881589187	Up	4.281546251949661
AL590762.11	0.8340665041743831	6.989148531993739	4.928408748828201	5.9537275473181705e-6	5.23097421012904e-5	3.128996229609089	Up	4.281417421136061
RABGEF1	0.869118870932831	6.930776436574718	4.928247894790257	5.9572990905886e-6	5.23097421012904e-5	3.1284128606668427	Up	4.281417421136061
RAVER1	0.805712427225493	8.208363665252241	4.928121027376787	5.9601174865585395e-6	5.23097421012904e-5	3.1279527570457235	Up	4.281417421136061
FAM60A	1.242891030059436	11.154369902342802	4.928101417433633	5.9605532435012055e-6	5.23097421012904e-5	3.1278816391394964	Up	4.281417421136061
ZMYND19	0.9513534449165064	7.971027915367249	4.927271712518803	5.979018899476909e-6	5.245167691761204e-5	3.124872728771904	Up	4.280240622543376
HIST1H2AJ	1.9075554177181493	8.183054849359133	4.926812314065955	5.9892671995890594e-6	5.252144279777619e-5	3.1232068275481906	Up	4.279663352070257
LARP6	1.6173826461943177	8.712775313101563	4.926616779797723	5.993634409011421e-6	5.253610224163468e-5	3.122497789643531	Up	4.2795421515298395
GDE1	0.5830137978967613	9.334595650083056	4.926531888631908	5.995531402286295e-6	5.253610224163468e-5	3.1221899649608007	Up	4.2795421515298395
MOB3B	1.2758356146815473	10.339020875432333	4.920424791197139	6.133554464730758e-6	5.3683853327687456e-5	3.100051304434344	Up	4.270156318865693
LMAN2	1.0712274312144725	9.143898508620063	4.91918555169954	6.1619389471197545e-6	5.3891055493559966e-5	3.0955605028127957	Up	4.268483310363155
KRTAP4-1	0.6774004217121732	6.292985064533241	4.918777110792441	6.171322322924847e-6	5.39524965327465e-5	3.094080492831533	Up	4.267988454497101
FASTKD5	0.8086401039597657	8.816458891513358	4.913202121775278	6.3008066979881655e-6	5.500044122215614e-5	3.073884804169162	Up	4.259633826513409
VTA1	0.8586797568588747	10.49777280806885	4.911608531208792	6.338305380698838e-6	5.530667002479357e-5	3.0681138648708446	Up	4.257222489305074
TARBP2	0.9997277849840138	9.140573294375557	4.910922237524417	6.3545217073621896e-6	5.5427030935089413e-5	3.065628823575449	Up	4.256278384677293
ZNF165	1.3148361752877076	6.74958523311235	4.9101458613183135	6.372915521877894e-6	5.556628590893458e-5	3.062817788908812	Up	4.255188630804348
MREG	1.5466583258881972	9.342039055416132	4.909302234874886	6.392961683928319e-6	5.5719836330131816e-5	3.0597634913493144	Up	4.253990167930504
TFDP3	1.0600917576952833	6.722593701779542	4.90825558668286	6.417917798814872e-6	5.591604772242401e-5	3.055974500382864	Up	4.252463533131514
ZNF672	1.168626385382856	10.322721555006371	4.906768140176802	6.453548304887426e-6	5.6205074863920606e-5	3.0505904043663987	Up	4.25022446937946
PLOD1	0.9142280582828946	8.969127032359287	4.905736117520626	6.4783831765245e-6	5.639989676396653e-5	3.0468552415939056	Up	4.248721690961351
DPP7	1.1205294704334596	8.563399110429629	4.905093721341237	6.493889164217031e-6	5.651338538916753e-5	3.0445304220738647	Up	4.247848675859128
UQCC1	0.6643436464203436	9.063821540419148	4.904718582359033	6.502960957050798e-6	5.657081510888411e-5	3.043172865877506	Up	4.247407563618788
ZMYM3	2.057315161944664	8.644685050023217	4.904197236052106	6.515588999332843e-6	5.665912607971726e-5	3.041286292494898	Up	4.246730128398064
KRTAP2-3	1.5823958481160565	6.6220144096721905	4.9030995289786645	6.5422561346589556e-6	5.686940657479569e-5	3.0373143683309456	Up	4.245121303533243
HEXIM1	0.8429473752440018	10.89171474598113	4.902198106634697	6.564234653701464e-6	5.6973871260256376e-5	3.034052982788741	Up	4.2443242701019175
OPA3	1.2379493502310115	8.814889167909884	4.899884517191431	6.620975863261148e-6	5.744456077950391e-5	3.0256835761026677	Up	4.240751086823895
LINC01210	1.0414510334557114	10.229804213703902	4.8972566858254805	6.68600606046945e-6	5.786578373199025e-5	3.016179603582386	Up	4.237578160433047
GXYLT1	1.1093325921934216	8.643166042653238	4.897207472512806	6.687229869635132e-6	5.786578373199025e-5	3.016001638141849	Up	4.237578160433047
PPP1R14D	0.6886222521887584	6.838505853788884	4.896241736780091	6.711289639084287e-6	5.8008158538953305e-5	3.0125095060772695	Up	4.236510920932417
LINC00311	0.8643937884070425	5.711624614497269	4.895341510394452	6.733793598613694e-6	5.818068872457806e-5	3.0092545435215845	Up	4.235221142017914
REV1	1.1708231327836298	9.36042319219844	4.893567652771623	6.77835293789744e-6	5.854357752591753e-5	3.0028415857353172	Up	4.232520741890414
PPIAL4B	1.0189957090648685	6.4799321178157285	4.891217276874091	6.8378389752335825e-6	5.9035063363912885e-5	2.994346014159075	Up	4.228889966284105
DOK4	1.5391956408118928	7.791745444618817	4.890026514907995	6.868170753401492e-6	5.9252216691958046e-5	2.9900426535405353	Up	4.227295397569716
GJB1	1.1837622687899785	7.483248150305681	4.889124133180156	6.891244368269772e-6	5.942886539828273e-5	2.9867818082437845	Up	4.22600256110926
SCGB1D2	2.091313878439893	8.810369856315589	4.888326505017068	6.911702588487132e-6	5.958283478598232e-5	2.983899731546715	Up	4.224878838102813
SHCBP1	1.3261447059771792	7.777074954023599	4.886062017898302	6.970108306500916e-6	6.004107979835635e-5	2.9757186241582625	Up	4.221551505864963
ACBD6	0.6706695493892632	9.613460026747475	4.885832832307009	6.976046300792423e-6	6.006563461942079e-5	2.9748907232438233	Up	4.221373930056771
RUSC1	1.1473375649520374	9.86708566172326	4.885749385068949	6.978209572901808e-6	6.006563461942079e-5	2.974589286216321	Up	4.221373930056771
MB	0.9163026054200838	6.795890460228159	4.885444160685412	6.986127749131898e-6	6.0111175920416954e-5	2.9734867423587135	Up	4.221044776094717
ATP5E	1.005480087123278	11.97073773719286	4.885022359957961	6.997084632140709e-6	6.016020266769908e-5	2.971963149112047	Up	4.220690709362639
DHTKD1	1.021355001086663	8.873321064708325	4.884727186325621	7.0047621887938654e-6	6.0203589074911666e-5	2.9708969838120742	Up	4.2203776172311045
AVIL	0.5676399492304389	7.642674144672347	4.884312695017233	7.015557145923909e-6	6.027372585114273e-5	2.969399894090661	Up	4.219871961567126
PRDM15	0.7940496786387152	8.596780069358006	4.8838173534978795	7.028479099419368e-6	6.036207707042632e-5	2.967610860761531	Up	4.219235824484512
LOC101929505	0.6460076207619236	6.05998618231165	4.883456181589299	7.03791564861531e-6	6.042043982163965e-5	2.966306462971251	Up	4.218816117668897
RASGEF1A	1.04577752047848	8.459195534745433	4.883155263847001	7.045787364859336e-6	6.046532975266945e-5	2.96521971141679	Up	4.218493574323985
SCN11A	1.0418371954291317	5.877968792008501	4.882366766495413	7.0664545595475425e-6	6.0597231584665754e-5	2.9623722338843015	Up	4.217547216344719
EIF1B-AS1	2.1920943464993368	8.989504710826434	4.881607574232786	7.086409667511999e-6	6.07455851566156e-5	2.9596307859958015	Up	4.216485280063684
CD34	0.6147764613039586	7.905973528948287	4.881472160949136	7.0899747468014045e-6	6.0753382858452934e-5	2.959141828534446	Up	4.216429534752601
RP11-266L9.1	1.1169184181629213	6.167171243282886	4.877296890344812	7.200763794877452e-6	6.167962368513711e-5	2.9440686226556254	Up	4.209858284632309
WFDC9	0.5107360369915783	6.2451201479375955	4.876599100473242	7.219443753549247e-6	6.180942768132242e-5	2.9415501039841496	Up	4.208945277699136
EVPLL	1.1624787086884716	7.986505774780783	4.876529078438857	7.221320870325401e-6	6.180942768132242e-5	2.941297384113601	Up	4.208945277699136
ITGB6	1.943570184960832	7.904048775110641	4.87542096768901	7.25109019259127e-6	6.201404889717073e-5	2.9372982726452053	Up	4.207509912641206
DEPDC1B	1.8338405050519917	7.044214460713469	4.875245788682201	7.255807338870464e-6	6.201404889717073e-5	2.936666099710318	Up	4.207509912641206
PSPH	0.8386206700918173	8.200963541250136	4.87470466034739	7.270397576013123e-6	6.209011800731774e-5	2.9347133826710783	Up	4.206977514741258
STAT2	0.7069467037007335	11.030644749521636	4.873064072896717	7.314807695711488e-6	6.242278450957969e-5	2.9287937694078012	Up	4.204656862550322
ADCYAP1R1	1.2721946301332423	9.159648754254308	4.872512272923161	7.329804262203372e-6	6.250413407191611e-5	2.9268029572272303	Up	4.204091257132006
WDR3	1.0038478505308337	9.5489421292219685	4.872307253984106	7.335383830606054e-6	6.252840784666017e-5	2.926063306073634	Up	4.203922629566782
CEPT1	1.8774880383431372	8.034915263821384	4.871699529860524	7.35194739325804e-6	6.264625862582895e-5	2.9238708918280745	Up	4.203104860929629
RCAN3	1.3407220897305496	9.383169878353735	4.870498445960479	7.38479066616242e-6	6.287928010834761e-5	2.919538257445299	Up	4.201492439086363
C19orf82	1.26888779478121	7.680199773749834	4.870103648924228	7.3956175707543455e-6	6.293646684354567e-5	2.9181142261588393	Up	4.201097641362762
COL13A1	1.6345234433793232	9.287143751810545	4.869779107248843	7.4045294180159935e-6	6.297703663746763e-5	2.916943645837049	Up	4.200817778794334
TBC1D14	0.9771562662233376	10.063204825461296	4.8668587972434665	7.485194374649833e-6	6.361581058603771e-5	2.906412092370709	Up	4.196434934714264
ANKRD65	0.6042472727714268	7.472707791629524	4.8667539393458155	7.488106689986943e-6	6.361693017460499e-5	2.9060339965522397	Up	4.196427291537926
IL36G	1.7697903797236512	7.153054398412719	4.864621168903114	7.5475831394142655e-6	6.409842414501075e-5	2.8983444915593664	Up	4.193152647447467
RET	1.4309025197920828	10.336603426321584	4.863814398401525	7.570201715760001e-6	6.42210992855333e-5	2.8954361647095324	Up	4.19232226479949
LOC100129029	0.5304973232333392	7.984418615832992	4.863805587905558	7.570449091878286e-6	6.42210992855333e-5	2.8954044049938146	Up	4.19232226479949
KLHL31	1.5544333071333991	8.576239560217747	4.863522566098998	7.578399824650445e-6	6.426471815721925e-5	2.8943841938066894	Up	4.192027392783499
IL1RAP	0.9363991124608956	9.811891260553605	4.862206804513128	7.615469934294676e-6	6.451571877556048e-5	2.889641619572014	Up	4.190334459848481
KATNAL2	0.906225447429848	6.649115637172343	4.862171798589056	7.61645860451894e-6	6.451571877556048e-5	2.8895154512341117	Up	4.190334459848481
MT1F	1.193220904804095	10.98141201017412	4.861689012100753	7.63010672282298e-6	6.460740625887009e-5	2.8877754355313217	Up	4.189717693878128
BCAS4	0.7686302475416902	7.759415933540959	4.860777777862358	7.655932026635754e-6	6.480209723914148e-5	2.8844914663419283	Up	4.188410938502131
AQP4-AS1	0.6649699639149764	5.816604135795909	4.860629741927402	7.660135577959701e-6	6.48136989231287e-5	2.8839579912578506	Up	4.18833319261777
BCL2L11	1.1723268966196638	12.09064442721636	4.860155312703736	7.673622434571184e-6	6.490381060279265e-5	2.882248348155282	Up	4.1877298043524345
UNC5B-AS1	1.3600295733835388	10.40061152268892	4.859733824423308	7.685623784976145e-6	6.498129585235374e-5	2.8807295471817413	Up	4.1872116322351864
HMGA2	2.5148137542687	8.794259626047364	4.8588407124564705	7.711114706484812e-6	6.517273489828816e-5	2.8775114890937887	Up	4.185934053957393
LOC147004	0.6722260612405906	7.374134590976108	4.857530561586268	7.748658265517666e-6	6.544169525905451e-5	2.872791257060366	Up	4.184145458845955
LTBP1	1.4516792842882502	9.545321466488025	4.854975731375229	7.822384006592726e-6	6.60399718401605e-5	2.8635883839018943	Up	4.180193120594972
MIR3658	1.2046686019299295	9.086195734910774	4.851172175422039	7.93341692551399e-6	6.69279667547325e-5	2.8498916081997168	Up	4.174392368491389
STAU2	0.943266541749244	9.672748792211689	4.84930852139358	7.988381461449192e-6	6.736681881920237e-5	2.843182338843115	Up	4.171553960319667
KB-1410C5.2	1.1172366552006665	5.296398256897114	4.847090549951927	8.05428116066882e-6	6.782256116118584e-5	2.8351990775172604	Up	4.168625814127848
LMNB2	1.292951008949034	8.015468149630632	4.846194368732159	8.081058719188313e-6	6.802301046221833e-5	2.831973890448146	Up	4.167344151612384
DNAJB11	1.0358007043663822	10.75947771136911	4.845089040521658	8.114205400071597e-6	6.827690524024939e-5	2.8279964076649593	Up	4.165726172202037
APTR	0.8026846710895077	7.783032391456252	4.84433823272807	8.136796456654646e-6	6.841667259529645e-5	2.825294896038696	Up	4.164838051294502
CDCA8	1.1974575780318002	8.424985489634844	4.84402192043957	8.146332375457978e-6	6.84244620244167e-5	2.8241568188699135	Up	4.1647886084702055
DACT3-AS1	0.9682654993574022	6.491137751012674	4.844009899613607	8.14669498468076e-6	6.84244620244167e-5	2.8241135691742345	Up	4.1647886084702055
ZHX1-C8orf76	1.0625484306028463	7.141006228744851	4.843906218817741	8.149823179591035e-6	6.842561633976636e-5	2.823740538421256	Up	4.16478128201789
METTL1	1.1900926440217583	9.52713209932153	4.842928735411134	8.179373002806235e-6	6.864852345238586e-5	2.820223857377022	Up	4.163368799481521
NDUFS1	1.0662561112605395	9.120658252924898	4.842517050202876	8.191849779225892e-6	6.87280275390206e-5	2.818742841757115	Up	4.162866119952593
DUSP10	1.2766279792085875	8.049350821664833	4.841698329115694	8.216717741385366e-6	6.891139486992513e-5	2.815797711759985	Up	4.161708959225053
POLQ	1.220264419320781	9.07240126330665	4.841369326819311	8.22673168092185e-6	6.897009678556651e-5	2.8146142798608116	Up	4.1613391645662565
LLGL2	1.535973814404647	9.109881864752987	4.840834098138144	8.243048089841282e-6	6.908157408332553e-5	2.81268912562555	Up	4.160637775217001
IMPAD1	1.5673342244835524	9.54221305731322	4.84046403604016	8.254347899723889e-6	6.915094309695454e-5	2.8113581144609396	Up	4.160201892503185
LOC100506125	1.5406972135618702	7.386536754869613	4.835528816501623	8.40649957915845e-6	7.034831889962185e-5	2.7936120621213023	Up	4.152746276357752
OGFR	0.661277224709405	8.932007446448194	4.834405421128693	8.441514753259433e-6	7.06155086068821e-5	2.7895737482967897	Up	4.15109990854123
LINC00315	0.8286807347219316	7.773747800112633	4.833639990397341	8.465454121121769e-6	7.07640207662203e-5	2.7868224769602117	Up	4.150187498727653
LOC101927420	0.607359761532674	8.616742687138935	4.832494931439306	8.501390552823972e-6	7.101252809713752e-5	2.782707049117506	Up	4.148665025879735
GBP5	1.7238292137316282	7.686885048866748	4.831568387554871	8.530578227412426e-6	7.123032819889376e-5	2.779377316796176	Up	4.147335054607556
PRSS21	1.3955164261654494	7.706913417643767	4.83133605932721	8.537912298302027e-6	7.126555836295223e-5	2.778542443084292	Up	4.147120307830956
CCDC58	0.8724179981379141	7.339433271327546	4.82937710422582	8.599997581746237e-6	7.172619944544403e-5	2.771503671085214	Up	4.1443221805071
CCDC108	1.5858750682061729	8.025713352794897	4.829298307554348	8.602504098881e-6	7.172619944544403e-5	2.7712205728725143	Up	4.1443221805071
ATP10B	1.2344876355291952	9.011273040700384	4.828257094588268	8.635692145124099e-6	7.19449271851478e-5	2.7674799399863472	Up	4.142999822619189
QPRT	1.3233552433822036	8.696795281025906	4.828179481268092	8.638171029223349e-6	7.19449271851478e-5	2.767201123746033	Up	4.142999822619189
TBX21	1.4737911769746868	7.503926688560654	4.827851366602566	8.648658337650285e-6	7.200606044654325e-5	2.766022435794441	Up	4.142630949294766
MEOX1	2.563428255902177	6.986310994748311	4.8273573635329905	8.664471300707468e-6	7.211147285881634e-5	2.7642478973363316	Up	4.1419956339922015
CHRAC1	1.4105018592222578	9.187612372771952	4.826289071203912	8.698763860661386e-6	7.23705521338443e-5	2.7604107123438277	Up	4.140438114015273
TUBB4BP7	1.0697682007961449	7.454478333944097	4.826128375381736	8.703933717120726e-6	7.238724082661036e-5	2.75983354581943	Up	4.140337976992425
CLDN9	0.5620915421023609	7.5331367913824865	4.82595813833463	8.70941380651306e-6	7.240649654041145e-5	2.759222120243238	Up	4.14022246577695
HILPDA	1.024709010044308	10.250276862969452	4.825236824978849	8.732670993424738e-6	7.257347608375031e-5	2.7566315547842892	Up	4.139222074826177
CDK1	1.615171655629668	10.27184202667442	4.82396932273634	8.773685978340865e-6	7.28878582056865e-5	2.7520798184665116	Up	4.137344811235509
MRPL28	1.2007136728298402	10.30727502088742	4.822901516777364	8.808385066735076e-6	7.31415323240808e-5	2.748245651029774	Up	4.135835945379958
LOC728743	0.6717347172273369	7.144327334829622	4.822833031635825	8.810615109277795e-6	7.31415323240808e-5	2.7479997553292135	Up	4.135835945379958
ZSCAN16	0.8505325223129052	9.017687284918008	4.821882699774376	8.841617231347112e-6	7.337227444178112e-5	2.744587761788938	Up	4.13446801817199
RAB3D	0.9532999697838208	8.739653984888767	4.821747806479187	8.846026407729505e-6	7.338224734678873e-5	2.744103477712563	Up	4.134408992016377
C1orf56	0.8049875980984096	7.582626387151708	4.821620856004806	8.850177924557103e-6	7.339007638127653e-5	2.7436477152190575	Up	4.134362660304872
SPSB3	0.6539945355273336	10.915975427806403	4.820559345597302	8.88496589345059e-6	7.365186038994784e-5	2.7398370287420297	Up	4.1328162787346665
CHMP4C	1.5822251873435045	9.176028717010066	4.8199992531401366	8.903375141841681e-6	7.377773265852801e-5	2.737826528337801	Up	4.132074695666827
GRAMD2	1.3956757351921008	8.375976764521152	4.81965127570165	8.914831312225809e-6	7.384591802766629e-5	2.7365774887907053	Up	4.131673506134777
NCAPD3	1.249279451256319	9.245445839594964	4.819475701176191	8.920617072069856e-6	7.386710025041123e-5	2.73594729306424	Up	4.131548949442037
DGCR6	0.5985835654846134	8.949258463961877	4.816368722892523	9.023611349716048e-6	7.469291030034496e-5	2.7247971047070676	Up	4.126720618580331
LOC100996634	1.1419233692470725	5.4931318053749605	4.8137308450839	9.111966594054373e-6	7.53152759051192e-5	2.715333075361708	Up	4.123116928600692
MUC20	1.6102098909327536	7.968587146833617	4.813604696154324	9.11621304296236e-6	7.53231629505005e-5	2.7148805468668504	Up	4.1230714514925015
CEP85	0.6373664656588272	8.11730731308101	4.811153970025692	9.199094582576794e-6	7.592571607315096e-5	2.7060902802600912	Up	4.11961110345775
LOC102546294	0.5962676867793864	7.143622407515925	4.80981085733559	9.244829407801743e-6	7.624818025273832e-5	2.701273702859427	Up	4.1177705167762575
NR2C2AP	0.7515836541475318	8.060759674860007	4.80926712266381	9.263407426935238e-6	7.637387334084732e-5	2.6993239807600267	Up	4.11705518336755
NCAPD2	1.0554706891834569	8.07972443532249	4.808782877314464	9.279983554591544e-6	7.644862587880226e-5	2.697587663335308	Up	4.1166303163813796
LINC00491	1.17737254227165	10.520231135620532	4.805442161023603	9.395131345442344e-6	7.726871678476524e-5	2.6856114022370603	Up	4.1119963001002935
CHMP2B	0.7204956552064541	10.940038181705953	4.805406416908644	9.396370889988958e-6	7.726871678476524e-5	2.6854832831706714	Up	4.1119963001002935
LOC101929645	1.562642897088928	6.327849408289922	4.805069214232854	9.408072366326162e-6	7.728807456702918e-5	2.684274656364363	Up	4.111887511893841
TJP3	1.0631561928809372	7.70445835489749	4.804960673497933	9.411841932799393e-6	7.729128915309307e-5	2.683885625196285	Up	4.111869448978382
LRRC66	0.941750723572274	6.303846114537688	4.804636493820463	9.423109321478212e-6	7.733716129632108e-5	2.682723726852129	Up	4.111611772991802
CSRNP1	1.0943466583531336	9.163264064450516	4.804605467878138	9.424188368990916e-6	7.733716129632108e-5	2.682612528154876	Up	4.111611772991802
RP4-594L9.2	1.600869934666897	7.430010999761256	4.802341973527025	9.503236686625769e-6	7.795788890401971e-5	2.674500959784919	Up	4.1081399300694095
C3orf55	1.5229939232145524	7.123459993880047	4.800104994379695	9.58199530720008e-6	7.85757959259608e-5	2.666486198824578	Up	4.104711211143955
LOC81691	0.6707243871498223	6.9564686146487995	4.798180166056325	9.650273974145588e-6	7.905070470980196e-5	2.6595912501664616	Up	4.10209425412881
SLC24A2	0.9068394982395036	7.622096312644241	4.792885742234615	9.840541952877294e-6	8.04940147800785e-5	2.6406328342049017	Up	4.094236410869661
PFKFB4	0.8866461516724238	8.614596715322298	4.791492776506724	9.891207406439477e-6	8.085063746049617e-5	2.6356465237185907	Up	4.092316551583374
GDF15	1.2698912373975562	7.1966001512881475	4.789981643382539	9.946459045611106e-6	8.124534656882393e-5	2.630237999398262	Up	4.090201504408868
MIS18A	1.1309764047291857	8.340417524963982	4.789977853208319	9.946598004251751e-6	8.124534656882393e-5	2.6302244349402857	Up	4.090201504408868
TRPM6	1.5224437968035982	9.917685586971835	4.789595326215466	9.960632297148136e-6	8.133094444198867e-5	2.628855455288641	Up	4.0897441844985405
JHDM1D-AS1	0.6356114373708506	7.120998671358091	4.788600984229281	9.99720363465906e-6	8.160043594625924e-5	2.62529716918217	Up	4.0883075210433315
PGLS	1.0596045886765708	10.571174623098996	4.787820173998518	1.0026013296691942e-5	8.180640449893543e-5	2.6225032610525796	Up	4.087212694743507
CPAMD8	1.0012907836566765	7.72608	4.787443599583314	1.0039936785409271e-5	8.18908070279425e-5	2.6211558740596006	Up	4.086764848924843
FOXK2	1.2176591397375152	9.813033898068149	4.786473699666832	1.0075884956161785e-5	8.215472983322361e-5	2.617685795822214	Up	4.085367428195597
PSME1	0.9492508168976332	11.786533157201005	4.7858553438729645	1.0098869162212926e-5	8.228111615290813e-5	2.6154736368756266	Up	4.084699825682209
STAB1	1.0747825817996066	10.137044891883932	4.785828070653844	1.0099884082560677e-5	8.228111615290813e-5	2.615376070474148	Up	4.084699825682209
STC2	1.549442806774973	7.9700032382770605	4.78576652602175	1.0102174713646527e-5	8.228111615290813e-5	2.6151559035180805	Up	4.084699825682209
NAV2-AS4	0.7637579801524295	7.264940700765744	4.785421868899334	1.011501189568272e-5	8.235635486168148e-5	2.613922967895335	Up	4.084302883745248
C14orf159	1.082552400045957	10.580597817350204	4.784806327569473	1.0137978145587128e-5	8.251398149871501e-5	2.611721108819684	Up	4.083472456622533
EIF2B3	0.6896198560675355	8.988294207999042	4.783669407343484	1.01805313697945e-5	8.280141386758918e-5	2.607654576382033	Up	4.081962247398095
PPP1R27	0.5743287881707095	7.352875658457483	4.783419504798217	1.018990820922861e-5	8.284822669471974e-5	2.606760787799023	Up	4.081716782898718
TCP11L2	1.5493575553714418	10.551643610702529	4.782623877070805	1.0219817954892354e-5	8.303239168678344e-5	2.6039153354762847	Up	4.080752452364441
PRKCSH	0.7455824222347776	9.739403377585752	4.776769093679802	1.0442567232908713e-5	8.475186084488061e-5	2.582983488954727	Up	4.071850757481326
MEG8	1.2064678457695246	6.042673520429436	4.77570474008471	1.0483567523686557e-5	8.50544472958953e-5	2.5791795645626694	Up	4.07030297322636
CELSR1	0.8090910701523644	9.130423655350851	4.77497569897779	1.0511741816135208e-5	8.522258717624288e-5	2.5765742580138253	Up	4.069445285679912
TTC9C	0.6949744724988083	9.147253589435572	4.7744477991366425	1.0532189009986548e-5	8.532612418269739e-5	2.57468787051842	Up	4.068917981125786
LOC102724112	1.2203029191845474	9.254245498318737	4.774377020225795	1.0534933447434648e-5	8.532612418269739e-5	2.5744349580841712	Up	4.068917981125786
TMEM35	0.8759105416426127	6.049291684016926	4.772994098646263	1.0588696284279248e-5	8.569465238345415e-5	2.5694937617653784	Up	4.067046278576446
CKS1B	1.5015003749212834	9.981635623004603	4.77126727849676	1.0656204882881688e-5	8.611914924600853e-5	2.563324776927563	Up	4.064900269136392
SLC7A1	1.3054766957518904	10.333501081249707	4.77080385448084	1.0674393476713634e-5	8.623568091586555e-5	2.5616693987179344	Up	4.0643130031009695
POLE2	1.1759617676576708	8.283194307011659	4.770576261138627	1.0683337219990446e-5	8.627746991039936e-5	2.560856450032465	Up	4.064102599082513
RP11-214N1.1	0.9353515876641776	5.050101633183783	4.766373734392441	1.0849805214845365e-5	8.756003298428469e-5	2.545848649096224	Up	4.057694083503259
DNPEP	1.082137596950977	11.383379978671124	4.765994307223632	1.086495892070523e-5	8.765140872595733e-5	2.5444939757829035	Up	4.057241099570263
B4GALT3	0.6073714799041525	8.770053844191567	4.765845742873609	1.08708979683928e-5	8.766052527640465e-5	2.5439635688700877	Up	4.057195931309706
GPX3	1.1653207484327943	11.853160836952371	4.765615508479629	1.0880108142711744e-5	8.768087150302993e-5	2.543141597936997	Up	4.057095142173166
ADRB3	2.2640045553658865	9.054852299836549	4.764280912468523	1.0933646896443976e-5	8.801906900795464e-5	2.5383772689800006	Up	4.055423229352332
FAM71E2	0.6047479519231649	6.922185681368578	4.764186032724466	1.0937462878168407e-5	8.801906900795464e-5	2.5380385854779073	Up	4.055423229352332
SORCS3-AS1	1.0943684872383397	6.517081038202897	4.76253939160701	1.1003896867310147e-5	8.852255851870213e-5	2.532161239695882	Up	4.052946042389419
CNPY4	2.1720844915525284	7.757664442208476	4.76232788209666	1.1012458753747511e-5	8.856029659999624e-5	2.53140637109963	Up	4.0527609376179745
LOC349160	1.1939007193772175	6.408865028888121	4.75951009732387	1.112714485905689e-5	8.938517168852584e-5	2.521351357524874	Up	4.048734521338095
RP11-195M16.3	0.8436087663385674	7.335768362194931	4.759424197597666	1.1130659300695402e-5	8.938517168852584e-5	2.521044877107168	Up	4.048734521338095
FGFRL1	0.7384798032317725	7.608133620053568	4.75820810791279	1.1180529977401604e-5	8.975415626420045e-5	2.516706294341195	Up	4.046945431319964
FOXJ2	0.9707380750801669	10.416295547955512	4.755550764482847	1.1290265478356284e-5	9.048187911654116e-5	2.5072276852028432	Up	4.043438388614538
LOC692247	0.6802356849535673	9.855712092060262	4.755534141226118	1.1290955237454653e-5	9.048187911654116e-5	2.5071683989398545	Up	4.043438388614538
TAF5L	0.5748372353211	8.241738573246996	4.7540287189627675	1.1353591519198208e-5	9.09201331353643e-5	2.5017997783778236	Up	4.041339937004351
SLAMF9	1.1742921739515522	8.043188924504399	4.753170027847935	1.1389470980134417e-5	9.117554463068412e-5	2.4987378914328966	Up	4.040121633778981
ENDOG	0.9339639829969943	7.530348546297215	4.751864949031975	1.1444214319666256e-5	9.158173466934042e-5	2.4940848049997646	Up	4.038191134665193
TPPP3	1.7497450127141594	8.097074235468076	4.751109671911927	1.147601272081163e-5	9.180408917463262e-5	2.491392246387405	Up	4.03713797384858
TBC1D20	1.0484536541920173	8.690797404239271	4.749893789015999	1.1527384658487534e-5	9.218281496034124e-5	2.4870580659233505	Up	4.03535003408222
FAM107A	2.335285220936754	8.356256408965539	4.748973503575827	1.156641658328654e-5	9.246262928337272e-5	2.4837779399636473	Up	4.034033761049088
NRIP3	0.5566942180107803	7.288777558890792	4.747606319499644	1.162464106253225e-5	9.289562098137455e-5	2.478905524523232	Up	4.032004757787291
OR7D2	0.8043677214042271	6.061691131064457	4.746421634119799	1.1675324741054144e-5	9.32680707927995e-5	2.4746840535554204	Up	4.0302670063261
GEMIN7	0.6259200277805457	8.285659137140689	4.745812690010974	1.1701460700637284e-5	9.344423014655512e-5	2.472514359759455	Up	4.029447509618199
P2RX2	0.8992148456487854	9.041902009374915	4.740589639390992	1.1927992944557166e-5	9.515360898832754e-5	2.4539099542716043	Up	4.021574735133219
FUT8	1.3341430462167914	8.853522944048638	4.740122602180591	1.1948456359934844e-5	9.52783708072461e-5	2.452246861069802	Up	4.021005677590269
NUDT10	0.986341333370972	8.105924790705036	4.740042685508712	1.1951961371423416e-5	9.52783708072461e-5	2.4519622902753584	Up	4.021005677590269
POLB	1.065048798440369	11.077134428826673	4.739856595487204	1.1960126857966229e-5	9.531025509697294e-5	2.451299661785632	Up	4.020860368066668
MTMR2	0.9273166876026462	9.63326588509919	4.739234437216066	1.198746623627003e-5	9.549486073106616e-5	2.4490843752309894	Up	4.020020000313602
EPHB4	0.8087852896451047	8.806528008743133	4.738881829199371	1.200298789260675e-5	9.55852279829272e-5	2.44782892494963	Up	4.019609219661174
S1PR3	1.468197236462606	9.12575441373156	4.737186376587711	1.20778953473017e-5	9.614828380338052e-5	2.441792950601749	Up	4.017058463285861
SOX5	0.96661320528161	7.817723620565973	4.736757532893372	1.2096914440404824e-5	9.623272096036924e-5	2.4402663921717886	Up	4.016677234445233
HOXA10-AS	0.7034366834601995	6.0540498327011605	4.736328506692181	1.2115970876309975e-5	9.631733762303542e-5	2.438739251308287	Up	4.016295530567197
LEMD1	1.9644445932661856	8.025127723852359	4.736168606636402	1.2123080790822583e-5	9.634038395735667e-5	2.4381700960288955	Up	4.016191627170132
FAM71E1	0.8987581685428196	7.703956577735253	4.735569844854695	1.2149740770248512e-5	9.651872190365128e-5	2.4360389200665926	Up	4.015388437632156
ORAOV1	0.7751823298748564	7.179845198246481	4.734698639951772	1.2188633555799294e-5	9.679408091743562e-5	2.432938269956799	Up	4.014151199545868
GNB1	0.6395043224901684	10.893324722904788	4.731482267449888	1.233327571701836e-5	9.78747884598207e-5	2.421493487424468	Up	4.009329163588732
E2F4	1.3187539857483197	11.54241173522616	4.727632114987702	1.2508623143390878e-5	9.912878035941804e-5	2.4077985151386345	Up	4.003800237173165
CALHM3	0.5986974982983817	7.367226125347241	4.726105718976757	1.25788111699479e-5	9.965049195195222e-5	2.402370637258481	Up	4.001520552944519
ACTR8	0.5350583678629048	8.40015503374199	4.725779331748885	1.2593869182707914e-5	9.973524853969344e-5	2.401210112329678	Up	4.001151325732108
PSMG4	0.9420420081545622	9.5110407436816935	4.722851176164815	1.2729750037082738e-5	1.0074159498388652e-4	2.390800310546676	Up	3.9967911774884612
ASF1B	0.8761009316906554	7.762038018443735	4.721512604839671	1.2792341818543096e-5	1.0113680508483514e-4	2.386042643638807	Up	3.9950907698644604
LINC01106	0.8498913659896496	6.530524363276002	4.721067421494156	1.281322512440649e-5	1.012620993510522e-4	2.3844604802080847	Up	3.994553073126084
COA7	0.8228956454010987	8.899876085540914	4.720147586863046	1.2856479490588483e-5	1.01533791599991e-4	2.3811916564774007	Up	3.9933893955532085
GPSM1	1.1225878562760665	10.39441061588989	4.715227498103539	1.3090272357649232e-5	1.0331126909574628e-4	2.363712388222564	Up	3.985852303464245
TMEM52	0.6755753375256139	6.06966671938093	4.715018890593941	1.3100276100781135e-5	1.0335214376199022e-4	2.3629714795392873	Up	3.9856805106733932
RP11-495P10.9	1.154558284066959	6.003375955371027	4.713119313910869	1.319171390609938e-5	1.0403764993369448e-4	2.356225515600614	Up	3.9828094664757394
MAPKBP1	0.8829731489660695	9.85418325433211	4.71076664940214	1.3305824987243388e-5	1.0486530137207768e-4	2.347872348363743	Up	3.9793681906958978
CENPW	1.2791968464298176	10.744598135766982	4.709536912616158	1.3365853467452344e-5	1.0530212172239746e-4	2.3435069651611427	Up	3.977562878168301
LMF1	0.5158599808856748	8.164133464455395	4.709404435833688	1.3372335943539824e-5	1.053169273845947e-4	2.3430367255912	Up	3.977501819898111
ALS2CL	0.6567808268581983	8.130052569891376	4.708824315952146	1.3400759048091698e-5	1.0550446189307984e-4	2.3409776085746143	Up	3.976729173213989
LOC100506172	0.6795234805484638	7.563881421034308	4.708028862676223	1.3439828295922584e-5	1.0577565585910312e-4	2.3381543749160416	Up	3.97561427315709
APITD1	0.6066155124250532	8.965936984087694	4.707865228120985	1.344787909225829e-5	1.058026223355493e-4	2.337573629944635	Up	3.9755035681066446
C14orf178	0.5330622707527821	7.278599844312111	4.705958889246164	1.354201806458707e-5	1.0643347004455086e-4	2.330808694432899	Up	3.9729217783391033
POC1A	1.430890325301542	9.259703245328986	4.705190590313826	1.3580139752264196e-5	1.0669643454397408e-4	2.3280826484430426	Up	3.9718500930755254
ZNF335	1.8659421985344329	8.428372148864653	4.70411009369419	1.363392935517959e-5	1.0704552838612004e-4	2.3242492457900488	Up	3.9704314697781764
PRSS3P2	0.6586004779195145	8.519639228519058	4.703721025183293	1.3653348927763586e-5	1.0716122474041272e-4	2.3228690084490387	Up	3.969962331505006
OR7E12P	1.6557962077369108	10.025824006330232	4.70326444499641	1.3676172624116906e-5	1.0730355057173206e-4	2.321249342091181	Up	3.969385907407777
SPATS1	0.8645983467248346	6.418088173744478	4.699876986559252	1.3846672443678805e-5	1.084924722051121e-4	2.3092351331654237	Up	3.9646003944716566
POLR1D	0.8361734080146856	9.642823546106452	4.6993007006646375	1.3875884093052056e-5	1.0868413288768846e-4	2.3071916592218757	Up	3.963833855199029
LOC101929406	0.5223924463317529	7.245382768038837	4.69899312003355	1.3891499799849122e-5	1.087319958675156e-4	2.3061010479192	Up	3.9636426400533895
LOC101929133	1.1295138217658565	5.628321041759088	4.69793347626919	1.3945428722170625e-5	1.0907947478103993e-4	2.302344060087731	Up	3.9622569618584356
PXDNL	0.6326575149394245	6.0962070770482715	4.697816512371632	1.395139391794276e-5	1.09088838499184e-4	2.3019293878560374	Up	3.962219682282301
APOC1	0.6637896164730002	9.945810712791594	4.697441011462591	1.397056140945276e-5	1.092013920351451e-4	2.3005981584461948	Up	3.961771825465266
SMOX	1.385432727669179	7.049639116440209	4.696942168371957	1.3996064650896434e-5	1.0936337539202851e-4	2.298829736225364	Up	3.9611280941652707
NACC1	0.9850547120255556	8.33722709989196	4.6968009224014065	1.4003294065228829e-5	1.0937365820066624e-4	2.298329029422912	Up	3.9610872618747366
IFNL1	1.2055779168976235	7.942596713948838	4.696729683617059	1.4006941672623458e-5	1.0937365820066624e-4	2.2980764958725457	Up	3.9610872618747366
UCP2	1.5872804540130776	10.786211276374594	4.694395267089765	1.4126983859075447e-5	1.102733755413808e-4	2.289802293935895	Up	3.9575293311792152
SPEF2	1.5832871434710922	7.558476597651067	4.693609857158041	1.4167596968961004e-5	1.105526777124348e-4	2.287018910617854	Up	3.9564307338482627
SGK2	0.6256622534082723	6.6823610595801926	4.691816007865764	1.4260783462194116e-5	1.1124189049830862e-4	2.2806626203118876	Up	3.9537316391353956
PARPBP	1.6513425272567153	9.217367203456917	4.69171841779183	1.4265870159756444e-5	1.1124364123553774e-4	2.2803168559473344	Up	3.9537248042143838
KLK7	1.677175786929606	10.47176187777596	4.691582143260724	1.4272976172281914e-5	1.1126113180430592e-4	2.279834037406224	Up	3.9536565265103754
SNORA72	0.7843504213218102	7.1625680518677965	4.691190322168981	1.4293426855734136e-5	1.1138259980665576e-4	2.2784458599405246	Up	3.953182649361438
SCGB1A1	1.234735752906155	7.061252853936571	4.689678060366054	1.4372626097466614e-5	1.1196163176164066e-4	2.273088625499267	Up	3.9509307806246663
TMEM185B	1.367357192341645	10.546934437337583	4.689223159092489	1.4396533530046891e-5	1.1203343218841592e-4	2.271477290463147	Up	3.9506523590410394
SCAMP2	1.128238021356701	10.586146094661244	4.6888717008195595	1.441503104819405e-5	1.121392367737612e-4	2.2702324203910385	Up	3.9502424040612443
DEFA6	0.7128157749879627	6.863312353647583	4.6881911020342395	1.4450917411965296e-5	1.123801969640904e-4	2.2678218611153964	Up	3.9493102110706024
ANKRD39	0.7273969687028936	7.59568562739167	4.684570524815759	1.4643291392777903e-5	1.1379886677152368e-4	2.255001331005043	Up	3.9438620626977534
GPR39	1.7888501954101308	7.015314272290643	4.683564057625557	1.4697210675431058e-5	1.141791113898768e-4	2.251438282406096	Up	3.942413341255547
LOC101927079	0.8535824755362986	6.385496712346273	4.683341942946792	1.4709136038085767e-5	1.142329678938779e-4	2.2506520133153876	Up	3.9422085396267623
REEP6	0.6882749730150701	7.193464103476279	4.681961518564694	1.4783463024250794e-5	1.1477124212142312e-4	2.2457658296383007	Up	3.940166918145017
FAAH2	1.1308233326340114	8.456450050920068	4.681682674591753	1.47985213838891e-5	1.14849175964043e-4	2.244778913302585	Up	3.9398721164946657
OCEL1	0.6245810033601824	8.772972169934414	4.680686728792786	1.4852427478865964e-5	1.1522844635095772e-4	2.2412541861733315	Up	3.938440293758264
DNTT	0.5814216453667562	7.672161915868674	4.680439072282579	1.4865861718642388e-5	1.1529357635959972e-4	2.2403777688048363	Up	3.9381948889697793
XAGE-4	0.701341718352138	7.971743203726224	4.678914571409013	1.4948820317876532e-5	1.1589768215950428e-4	2.2349833063925137	Up	3.935925249415204
LOC100506469	0.5359693229046893	9.353789284322268	4.678272560202276	1.4983891504567514e-5	1.160909088157806e-4	2.232711803558403	Up	3.935201788924062
CD5	0.6842095439480946	8.05322581796975	4.677455855757046	1.5028621637890136e-5	1.1639804822386204e-4	2.229822441058558	Up	3.934054301925935
MIPEP	0.561989496852255	8.345014610842417	4.676312642475889	1.509145311297246e-5	1.168056007346742e-4	2.2257783655144037	Up	3.9325363326530063
PIK3R2	0.7678341532041237	9.6615233214692	4.67600705562641	1.5108291631659422e-5	1.1689638290183832e-4	2.224697446151281	Up	3.9321989269055306
STYXL1	1.0561842182481893	10.500239828458664	4.675684511746416	1.5126084393446549e-5	1.1699448439407154e-4	2.223556584525112	Up	3.9318346122169383
TCRA	1.842800125635577	8.32356728209995	4.675115033237927	1.5157548916411373e-5	1.1719822969198236e-4	2.221542392123511	Up	3.931078948393099
ENTPD2	0.5564029342914969	7.746940274851971	4.67448982211904	1.5192166242992645e-5	1.1742620657886106e-4	2.219331218861572	Up	3.9302349686550464
NDST1	0.8861266235646399	8.026047892094851	4.673864882967981	1.5226845545584022e-5	1.1757509255397128e-4	2.217121154133797	Up	3.929684670709349
AKR1C6P	0.7553176186850754	6.819485226602976	4.673316083380158	1.525736333549645e-5	1.1777099046991338e-4	2.215180473961632	Up	3.928961672455324
OGFOD1	0.8713209311913825	10.08762836568529	4.668842783403245	1.550834995820645e-5	1.1958730660391148e-4	2.199366089796958	Up	3.922314915367961
PRORSD1P	1.0415446173397136	6.9576775807151146	4.668498928572684	1.5527808615535488e-5	1.1969701257238424e-4	2.1981507769835096	Up	3.921916688687317
VWCE	0.8274455705031718	7.85630227445457	4.668356917486079	1.5535851930603387e-5	1.1971867845074938e-4	2.1976488691655893	Up	3.9218380858906077
LOC101929465	0.7328055405054137	6.366906705505915	4.667005606573169	1.5612591855638682e-5	1.2026952493776343e-4	2.1928733296193323	Up	3.919844404481012
THOC1	0.8631769552654145	9.330299413111671	4.6666836308497315	1.5630931060931096e-5	1.203523311176015e-4	2.191735567253791	Up	3.919545493409671
HOXB7	1.3666694360718807	9.758384296840203	4.6666322078734845	1.5633861973054404e-5	1.203523311176015e-4	2.1915538580182305	Up	3.919545493409671
GMDS	0.8121835102560357	8.345312077343289	4.6659776769198364	1.5671214568324394e-5	1.2051822457435088e-4	2.189241081676241	Up	3.9189472748018823
SFTPB	1.4304112565175515	10.613783349267647	4.665562122823915	1.5694974437103187e-5	1.2066038983416794e-4	2.1877728106411203	Up	3.918435275882249
RHOF	1.0100203945012431	9.290912341126438	4.66384514456593	1.5793517876134313e-5	1.2137719028823545e-4	2.18170692737763	Up	3.915862920037498
LOC101927673	0.8904839848026018	10.548997079391455	4.6634444255404155	1.5816603225998563e-5	1.2151378952572908e-4	2.180291393970129	Up	3.9153744350276756
NLRP7	1.766895413273871	6.911085219394938	4.662451693074572	1.5873936152661913e-5	1.2191332166389792e-4	2.1767848437264297	Up	3.9139488357350856
ASH1L-AS1	1.425819528518474	10.70152477694146	4.660628036842164	1.597978552743219e-5	1.2264391582761527e-4	2.170344256670382	Up	3.9113539915915805
DLG1	0.6687354026114569	11.146294055610328	4.6600380426185515	1.601417728369016e-5	1.2286665394820495e-4	2.1682608493336124	Up	3.9105659687923158
GINS3	0.8562847361973169	7.590212646638288	4.6592585766375105	1.605972432129902e-5	1.2317480145725788e-4	2.1655085746490625	Up	3.909478129082173
WFIKKN1	1.963259690866388	7.760013244339742	4.6585306187216835	1.6102375581779892e-5	1.234605398577554e-4	2.162938381010963	Up	3.908471828318759
MPHOSPH10	0.7057172149240039	8.603565485604234	4.658064816296416	1.6129724989730702e-5	1.236288033635004e-4	2.1612938822177687	Up	3.9078803343887163
DEFB119	1.5657232788723228	6.708673956537923	4.657520981771771	1.6161713321029987e-5	1.2378295952545143e-4	2.159373997706976	Up	3.907339137976964
LOC101928245	0.7813505114608565	6.581617487243824	4.6574192487856685	1.616770411473149e-5	1.2378295952545143e-4	2.159014864880384	Up	3.907339137976964
NPBWR2	1.456365477488811	6.737898001313693	4.657355165736846	1.617147891173453e-5	1.2378295952545143e-4	2.158788644036057	Up	3.907339137976964
CHD4	1.1081681255870013	10.57380372393444	4.65659507026591	1.6216317738068493e-5	1.240846600432338e-4	2.1561055344008553	Up	3.9062819048055206
RASSF10	1.975722545717324	7.343914741243213	4.656391265032143	1.6228361011283135e-5	1.241352964149605e-4	2.1553861464300708	Up	3.90610471440195
DEFB1	2.2834270112813666	8.340574007430096	4.655624034603259	1.627377648432744e-5	1.2444108696020305e-4	2.152678131528762	Up	3.9050362040985593
FLJ30901	0.5051971848091252	7.944284073791028	4.655345413656751	1.629029983083534e-5	1.2452581684920872e-4	2.1516947667739617	Up	3.90474060075446
LOC286149	1.2939014857698767	8.138680582748627	4.655118261365914	1.630378297848641e-5	1.2458725810447248e-4	2.1508930772374883	Up	3.9045263719455683
OLFML2A	1.3577286161913733	8.970117329894602	4.654707133224018	1.6328214103750608e-5	1.2473229064431058e-4	2.149442130635472	Up	3.9040211019884477
POC1B	0.6670934515907359	10.0038384349362	4.654248211156938	1.6355527514507e-5	1.2482625214885025e-4	2.147822586111741	Up	3.9036940687848998
BOP1	1.4709459071232	8.697012524542414	4.654225471944452	1.6356882029033308e-5	1.2482625214885025e-4	2.1477423410814085	Up	3.9036940687848998
SLC39A3	0.5472672397987708	8.560594073856125	4.653122812672673	1.6422695886817198e-5	1.2528532834066734e-4	2.1438513716012695	Up	3.902099784502762
RP11-151E14.1	0.580363982214477	6.706709093056461	4.650753771002124	1.656496986344027e-5	1.262878858732589e-4	2.1354932591703895	Up	3.898638307011758
RP11-686D22.8	0.8833856956527786	7.992421319032105	4.650329062891892	1.659060260265632e-5	1.2640993974989188e-4	2.133995090026361	Up	3.8982187756674898
SPSB1	1.0045225444331356	7.710144673623271	4.650213980411893	1.6597554919737542e-5	1.2640993974989188e-4	2.1335891453043176	Up	3.8982187756674898
GPATCH3	1.1066597627528871	8.502202807063965	4.648686713408744	1.669008890440031e-5	1.270301211057135e-4	2.1282023027163435	Up	3.8960932878711496
EIF5B	0.8003323130095996	12.17258120046262	4.647987879526774	1.6732597314659602e-5	1.2731130494249984e-4	2.125737732267077	Up	3.8951330303121283
C10orf2	0.7035899975041922	8.712621568045067	4.647819693952715	1.6742843387996787e-5	1.2734691285704071e-4	2.125144621576994	Up	3.8950115787365096
JUN	1.1479717480198843	10.976561282037231	4.646929895641254	1.6797152842465435e-5	1.2771753402551235e-4	2.122006904076323	Up	3.893749475424258
DNAL4	1.29141717501831	9.670334408968198	4.646708039807033	1.68107206858585e-5	1.277782320836401e-4	2.121224615284498	Up	3.8935431249817087
RPP38	1.034131317320238	9.822981672813471	4.645508847582885	1.6884243748176397e-5	1.2829445789256985e-4	2.1169964515492667	Up	3.8917921040199386
LOC113230	1.327078794180383	7.516601788701896	4.644635009751432	1.6938016467627286e-5	1.2866031831435746e-4	2.1139157807321363	Up	3.8905553784603053
NAT10	0.9458456533863462	9.91881511078056	4.644083223891469	1.697205724339172e-5	1.2887610277847965e-4	2.1119706373451743	Up	3.889827605482942
LEPRE1	1.0933742907586712	9.642440848067272	4.639893907398187	1.7232688326679323e-5	1.3072502527390457e-4	2.097206330965192	Up	3.883641265533371
RBM34	0.7936031736202356	4.896300708219904	4.639064853676764	1.7284726830466848e-5	1.3103289103851923e-4	2.0942853095105987	Up	3.8826196768358847
HAPLN3	0.8567053979417683	7.3542384409809936	4.638926316759839	1.729343751258432e-5	1.3105550077854145e-4	2.0937972251882657	Up	3.882544745738897
WDR34	1.130432046681216	9.663502210380196	4.637653289212983	1.7373681237851613e-5	1.3162001756318115e-4	2.0893125193431876	Up	3.8806780555844034
LOC441178	0.5375399765495148	7.916523785837191	4.636882046886224	1.7422471926557264e-5	1.319459567056285e-4	2.0865958364500417	Up	3.8796039135707883
LIMK2	1.0768033210897985	10.982124659569514	4.635280170479501	1.7524237619310967e-5	1.326727440411038e-4	2.0809539900416487	Up	3.877218288351524
GNAO1	1.1152067839786426	12.392538200716258	4.632541941628811	1.769953759395449e-5	1.3391128327119205e-4	2.0713121530927188	Up	3.873182828096547
INPP5E	1.1842550495967341	10.855964329581742	4.631320436084152	1.7778287778304758e-5	1.344626268032511e-4	2.067011918649494	Up	3.871398408810778
CUX2	0.5274620237145573	6.032604380374649	4.6309176464693405	1.7804330305636356e-5	1.3458332452463774e-4	2.0655940479330885	Up	3.871008747805776
FAM117B	1.243683594191351	9.370817832156602	4.6308916731244745	1.7806010898032187e-5	1.3458332452463774e-4	2.0655026205831666	Up	3.871008747805776
KIFC2	0.8839334356130779	8.636294243069209	4.6298817617745485	1.7871476696317306e-5	1.3498894530704643e-4	2.061947887060481	Up	3.869701795865943
YDJC	1.0642365813652646	8.074935354266437	4.629713161628175	1.7882428736588274e-5	1.350235491154195e-4	2.0613544783487017	Up	3.8695904806977786
WDR43	1.1036117523706874	9.297552412482098	4.629538785145965	1.789376287940696e-5	1.350235491154195e-4	2.0607407505674837	Up	3.8695904806977786
CTPS1	1.2016815808762944	8.249002193706056	4.629317865994237	1.7908132259750432e-5	1.350874243227267e-4	2.059963229973506	Up	3.8693850788199655
MED8	0.5563666690850493	8.80930557240506	4.629112028045238	1.792153082200149e-5	1.3514393661060386e-4	2.059238804190298	Up	3.8692034346535906
CIT	0.6243242597719867	7.554776195889144	4.628062016440803	1.799003112727028e-5	1.3561578983881933e-4	2.055543647331006	Up	3.8676897423226007
CPSF4	0.7739449772720324	9.964793672303772	4.627792427041761	1.800765962694032e-5	1.357039672611224e-4	2.0545949877387484	Up	3.86740745569746
H2AFB1	0.9877357492940302	6.944130544043459	4.626946502207052	1.806308413936022e-5	1.3603202831613642e-4	2.051618439040632	Up	3.86635882631115
HRK	0.9330836442230392	7.120926142084407	4.626661456388994	1.8081797590642893e-5	1.3609376448273352e-4	2.0506155124550594	Up	3.8661617727597672
LRRTM1	1.856045126422824	9.07500179923812	4.626640431500139	1.8083178636632277e-5	1.3609376448273352e-4	2.0505415381423946	Up	3.8661617727597672
TMEM208	0.6971348085379141	9.739260414355186	4.623821169320924	1.8269299208913797e-5	1.3735895386156384e-4	2.040623735227089	Up	3.862143025461294
MT1G	0.9975000821452192	11.532174306658028	4.621622851756192	1.8415720352912658e-5	1.384143449258504e-4	2.032892452133159	Up	3.858818898323611
TAF6	0.5595893152252351	9.14998759345248	4.6203698289171795	1.8499690086370623e-5	1.3899980607096012e-4	2.0284865151486686	Up	3.8569858056622404
RP11-379H18.1	0.8700016378214892	7.779154067115764	4.619944119755068	1.8528303245617513e-5	1.3916909059635032e-4	2.0269897541735373	Up	3.8564572106596686
GYS1	1.003851223203016	9.740425810844943	4.619267819901095	1.857384801321336e-5	1.394308412557593e-4	2.0246120786677766	Up	3.855641152308845
XPR1	1.2321463023329675	10.05069304509385	4.619245692358423	1.857534001256848e-5	1.394308412557593e-4	2.024534287571563	Up	3.855641152308845
GABRA1	1.5498602062284084	6.169942304432232	4.615371155446128	1.8838397444998633e-5	1.4126637008984717e-4	2.0109159560936556	Up	3.849961214108535
PPAN	0.7551908098415261	9.112641252467474	4.614633690197622	1.888887631657172e-5	1.4155211308445603e-4	2.008324547148729	Up	3.8490836431193
KRBOX1	0.7850414981363167	8.190626798490873	4.614396020009685	1.8905172696587563e-5	1.4162784745423276e-4	2.0074894329103588	Up	3.848851345469381
LOC101929550	0.6769451860741054	7.054681253062892	4.61356146791973	1.896250415082056e-5	1.4201084532459036e-4	2.004557195748166	Up	3.8476784874143632
LILRA4	2.0739301044204925	8.508750334240514	4.612340087464966	1.904671507802065e-5	1.4254818262022717e-4	2.000266303294464	Up	3.8460383152400923
STXBP6	1.222010995710086	9.734554848714952	4.611626596006291	1.9096076854018177e-5	1.4284172145330676e-4	1.9977599671205004	Up	3.845144924559016
PAQR4	1.240105897929226	9.95152940599651	4.61159272492067	1.909842326699879e-5	1.4284172145330676e-4	1.9976409904421208	Up	3.845144924559016
CLEC16A	1.2452263150749632	7.138138361960454	4.610384005055306	1.9182341184596516e-5	1.4342247841907964e-4	1.9933954914289336	Up	3.8433827769226427
ZG16	1.8397597386807556	8.146357013546018	4.609699688539202	1.92300104168919e-5	1.4368497985893855e-4	1.990992152968592	Up	3.8425886285624946
LOC731424	0.6084235271179823	6.69161403945086	4.609018058918518	1.9277607181514857e-5	1.4394659748886372e-4	1.9885984306917155	Up	3.8417985962202534
FASTK	1.266348573856467	10.34824005360776	4.608352480935642	1.9324193813194887e-5	1.4424738344276863e-4	1.9862612511192037	Up	3.8408920559307993
RAD54B	1.3325513444018764	8.30139524781649	4.605536239631711	1.9522531058258848e-5	1.45680361409623e-4	1.9763739038015613	Up	3.836598989796811
EPS15L1	0.8553174228980431	8.65324982785566	4.6017655681873775	1.9791192263747983e-5	1.4763700287000002e-4	1.96314051723727	Up	3.830804779855631
PDIA4	1.2082435334709647	9.371163231282456	4.60062236222917	1.987335490946585e-5	1.4810504461683035e-4	1.9591294583794587	Up	3.8294301486905336
IGSF3	0.7706386595317358	8.779733107838267	4.600497991325293	1.9882313503911545e-5	1.481235593148786e-4	1.9586931204722695	Up	3.8293758606771533
CPTP	0.7525279650573244	7.881882505723462	4.599966117878955	1.9920669419274477e-5	1.4836100118606143e-4	1.9568271845824503	Up	3.8286802445796453
TM9SF4	0.8392377811593725	9.380674915064867	4.59966225494862	1.994261475072776e-5	1.484761089755615e-4	1.95576121189631	Up	3.8283434222713932
DUS2	0.9311956958062532	8.596894388152622	4.599330745471409	1.996658360301422e-5	1.4860620242464616e-4	1.9545982939996671	Up	3.8279630639093334
STOML1	0.7454738120109283	8.73239390374966	4.59845849260007	2.002978347433448e-5	1.4902810279977192e-4	1.9515386801765784	Up	3.8267318272922015
CREB3	0.910153688424444	9.823677380718658	4.597152101780753	2.0124803750517496e-5	1.4958914392725466e-4	1.9469567865781636	Up	3.825099923206614
GSTP1	0.9855346885531766	11.385792766992653	4.596916299391005	2.0142001532757175e-5	1.496683511100849e-4	1.9461298293924587	Up	3.8248700259188
RHO	1.2410975647733131	8.432396757960936	4.596604016323973	2.0164799311712984e-5	1.4976071840167433e-4	1.9450346882745384	Up	3.8246020852917697
FAM178B	1.4467346920939246	7.732360249221752	4.596528117117205	2.0170344019598705e-5	1.4976071840167433e-4	1.9447685241274444	Up	3.8246020852917697
PITPNB	0.8346090657254468	12.134320536435936	4.596477133154667	2.0174069413609e-5	1.4976071840167433e-4	1.9445897342801155	Up	3.8246020852917697
PCAT6	0.977760196218112	8.052595084612701	4.5961628104398935	2.019705175301513e-5	1.4988269447201852e-4	1.9434874940680416	Up	3.8242485081068573
CHAC2	1.1503619090706154	7.754124394725546	4.59488219056839	2.0290950691111745e-5	1.5053069418351025e-4	1.9389971216370556	Up	3.82237493558267
GPRC5C	0.9553457186101184	9.261331843835247	4.593924123975629	2.0361476896104577e-5	1.5095600450614925e-4	1.935638168395916	Up	3.821149607569513
FAM155B	1.0434977401387109	7.755293934052727	4.5923733868851855	2.0476137564016048e-5	1.517077562587834e-4	1.9302020859937032	Up	3.8189922147684516
APLNR	1.0815266770428655	6.440717398015747	4.589165591344932	2.0715319216217327e-5	1.5338051402842594e-4	1.918960182596728	Up	3.8142298111006494
LRRC28	1.2547562639423226	9.125626192280476	4.586299907790378	2.0931291221385216e-5	1.5481886336971424e-4	1.908920619348014	Up	3.8101761253179967
SLFNL1	0.53893771505685	6.943996568114486	4.586229200050219	2.093664772349735e-5	1.5481886336971424e-4	1.908672944104867	Up	3.8101761253179967
DEGS2	0.8904305771701839	7.261419465402353	4.586023486025569	2.095223928911496e-5	1.5488409780150603e-4	1.9079523796092568	Up	3.8099931696622344
TMEM108-AS1	1.705991416736083	7.706332624904479	4.585722912544016	2.097504081221062e-5	1.5500257065328383e-4	1.9068995759647729	Up	3.8096610991763002
KALRN	0.8127661570150142	8.795457547064009	4.585431212633628	2.099719228590659e-5	1.5511616477534935e-4	1.905877887024668	Up	3.809342941664611
NTHL1	1.2677379267787696	7.840386376905518	4.585216106864814	2.101354184744597e-5	1.551868379366418e-4	1.9051244929546869	Up	3.809145115899276
NSAP11	1.408789339674987	6.801738080249716	4.584107574997351	2.1097994849354303e-5	1.557602530359397e-4	1.901242217889316	Up	3.807543355966562
CORT	0.5351742143187224	6.7765574707861225	4.583830861391708	2.1119127638558504e-5	1.5586597459438063e-4	1.9002731925955103	Up	3.8072486805693093
LOC100507165	1.3308876891203854	8.00414347089773	4.583443831522108	2.114871992427513e-5	1.5600540732759174e-4	1.8989179001505851	Up	3.8068603482363343
UBALD2	0.8803403904137035	9.43451302620234	4.582943075402941	2.1187067627878428e-5	1.5621621664783453e-4	1.897164450479063	Up	3.8062738844465303
ADAM19	0.7891472532830095	7.249691395819572	4.582622317895082	2.121166667147494e-5	1.5634720418062988e-4	1.896041336127117	Up	3.8059098804573837
GAS2L3	1.6107939359646792	7.708334206439772	4.582078148112614	2.1253462925077033e-5	1.565544038193295e-4	1.89413604818711	Up	3.8053347113269504
BICD1	1.6432441685115968	10.77117286837954	4.581493484986868	2.1298458720719397e-5	1.568353514873959e-4	1.8920891108327824	Up	3.80455603842801
LINC00563	0.6851603256653434	6.443648902676829	4.580853476724238	2.134782022052098e-5	1.5709770949671903e-4	1.8898485602773247	Up	3.803830146979043
KCNH8	1.8860775505233187	7.169905963932777	4.58038369498995	2.138412363422864e-5	1.5731426515354244e-4	1.8882040431943008	Up	3.803231894054611
PTH2R	2.6679118729128684	7.513745201630378	4.580149049244532	2.1402278899829124e-5	1.5739721599138234e-4	1.8873826750316995	Up	3.8030029536178254
HR	0.567802045376232	7.595897906532112	4.579790735792325	2.1430031675486893e-5	1.5755067310522643e-4	1.8861284544794907	Up	3.8025797370456074
ZNRF1	0.6651890705015848	8.908428607933528	4.579463177965137	2.1455432960245584e-5	1.576867493406549e-4	1.8849819331355375	Up	3.802204799569106
MCF2L-AS1	1.0307119374035638	7.920903974573204	4.57861917597552	2.1521018333146632e-5	1.5811797637895367e-4	1.8820279418722496	Up	3.801018752468946
LOC101928833	0.6663699962398972	6.324628639650217	4.578135100936086	2.15587226769308e-5	1.583441464287319e-4	1.8803338139839108	Up	3.800397986732798
SPATC1L	0.9335463897559828	6.267019475727045	4.577920824104606	2.157543311029183e-5	1.5840997123540697e-4	1.8795839339960247	Up	3.800217484891599
LOC403323	1.1352443278571238	7.621249538258869	4.577842653230028	2.158153242452745e-5	1.5840997123540697e-4	1.879310372847871	Up	3.800217484891599
PCF11	1.1487661594967502	11.238030854597795	4.57683319763329	2.166044656604628e-5	1.5893821583854164e-4	1.8757779697852976	Up	3.79877166646588
LOC283194	1.2050870723530682	8.014837885262338	4.575164074915541	2.1791546809664543e-5	1.5979769213407536e-4	1.869938058962684	Up	3.796429497241513
ITPKC	1.3591288032298152	9.531902437113366	4.574372129783215	2.1854019552268832e-5	1.6020445797384128e-4	1.8671675905494896	Up	3.795325403067623
STOML2	0.7029727781342512	9.67136087082482	4.574225663475504	2.1865592663678193e-5	1.602379546932394e-4	1.8666552331462445	Up	3.7952346070938416
RIPK2	0.8760420673656242	9.47057789057022	4.57242241186884	2.2008567337418588e-5	1.6123407368325325e-4	1.8603479233747529	Up	3.7925431731458854
CTH	0.8171246889275228	7.315351449495159	4.5717282944257205	2.206384415406398e-5	1.6158728886070097e-4	1.8579204192058496	Up	3.7915928056578356
TAF4B	1.0852545214232086	8.896966886923925	4.571374556010672	2.209206647005736e-5	1.6174220440590153e-4	1.856683379256153	Up	3.7911766421281174
COX6CP1	0.5398217945257189	7.653493332786758	4.571253068027119	2.2101767251600707e-5	1.61761462875679e-4	1.856258541365256	Up	3.7911249342310516
C3orf17	0.8685328588584582	11.830317398112802	4.570788631047689	2.2138890654592576e-5	1.6198134930809835e-4	1.854634480006017	Up	3.7905349876726375
PPIF	1.414490365092286	9.480144725331783	4.569862429798024	2.22131051319627e-5	1.6247238884724253e-4	1.8513959561114577	Up	3.789220434009123
CCDC107	0.7568323649040485	8.073592548807932	4.569387231692568	2.2251275655165243e-5	1.6269956398674517e-4	1.849734525258236	Up	3.7886136109131985
TMEM38A	0.6490420936737111	7.047516504007497	4.568677421420014	2.230841045403036e-5	1.6306521494497143e-4	1.8472529871757264	Up	3.7876386727343676
STUB1	0.7129917170716205	11.8436653769047	4.567932242084087	2.2368545864467935e-5	1.6345255855418776e-4	1.8446480097579423	Up	3.786608276935746
VANGL2	1.5162062097800382	8.28643341692687	4.566347337004111	2.249697165251447e-5	1.6431122732599857e-4	1.839108267897882	Up	3.7843327603681187
SLC35C2	0.8296641056147802	8.82729537928945	4.564266350396931	2.26666854662237e-5	1.6532099027444865e-4	1.831836065081169	Up	3.7816720019540813
PGD	0.8571920497953744	8.630768794304583	4.564261074527561	2.26671173166898e-5	1.6532099027444865e-4	1.8318176302264044	Up	3.7816720019540813
TOMM40	0.859024883899421	8.714247749688166	4.5637051488172915	2.271266690994852e-5	1.6549143510595932e-4	1.8298751852817656	Up	3.781224477915291
TRIM37	0.8984518756458932	10.612479242713215	4.563532050237096	2.272686786561484e-5	1.65542187168864e-4	1.8292703910662924	Up	3.7810913111337054
CABLES1	1.237900930564411	9.979534455007917	4.563004289820673	2.2770218534117137e-5	1.6580516544941628e-4	1.8274265062567396	Up	3.7804019436818024
LINC00284	2.146351908329468	6.974086231139973	4.562742244486465	2.2791773041005567e-5	1.6590931447825848e-4	1.8265110152680473	Up	3.780129231136858
KIFC1	0.6933851023361077	8.421346490538998	4.558762999507789	2.3121536035572115e-5	1.6814927621037966e-4	1.8126123072715472	Up	3.774304997742832
ADAMTS4	0.5255825701593428	7.372621097904165	4.558133465177855	2.317412964934572e-5	1.6840176105491935e-4	1.8104140416073085	Up	3.7736533711948326
WDR12	0.6627386252697889	9.897674553853172	4.557764512503499	2.3205007406715018e-05	1.6854202046293103e-4	1.809125771529456	Up	3.7732918041097925
LEPREL1	1.007837328898196	11.875210125988504	4.556490788552808	2.3311913757301674e-5	1.6926476510736434e-4	1.804678729360112	Up	3.7714334371186515
PCYT1A	0.6392209768176933	9.700392133560158	4.554529896200974	2.3477433173793715e-5	1.7041249796422158e-4	1.7978337801435282	Up	3.7684985574692265
ADIPOR1	0.6806570913263705	9.943270286185363	4.5510361754110384	2.3775177521120578e-5	1.7240959952637646e-4	1.785641904441678	Up	3.763438556926217
REC114	0.660818434315174	6.257876825632683	4.548625698606131	2.398274366923725e-5	1.7372820167316862e-4	1.777232991042676	Up	3.7601296758714082
YIPF4	1.3123770957103176	8.723979810089983	4.548572027063212	2.3987385335265513e-5	1.7372820167316862e-4	1.7770457848326524	Up	3.7601296758714082
ACRV1	0.5024926479644982	6.478600713196244	4.548131937498998	2.402547850367975e-5	1.7394902616635726e-4	1.7755107965602646	Up	3.759577998257359
SOX1	0.7360640091066744	7.67492	4.547733187712507	2.406004421793012e-5	1.7414417958305068e-4	1.774120063559061	Up	3.759091036377757
MEIG1	0.6955738664492532	7.494293039640605	4.547337406692643	2.4094400432281334e-5	1.743376937034044e-4	1.7727397471392292	Up	3.7586087035523166
NRM	0.94818636963924	9.51817261944618	4.545680784544937	2.4238724161741857e-5	1.7523913154767124e-4	1.7669628253519385	Up	3.7563689077706757
FLJ23867	1.0255982678832964	9.399528796548331	4.54564372777223	2.4241962120214147e-5	1.7523913154767124e-4	1.7668336145592791	Up	3.7563689077706757
TMEM68	1.0736256661461103	8.025953038037873	4.54483387137846	2.4312831207934473e-5	1.7569591446820368e-4	1.7640099162884342	Up	3.7552383372215186
NOX4	1.5192531753121754	7.97600708087882	4.543570777386891	2.442376486140892e-5	1.7638614781066123e-4	1.7596064496862764	Up	3.7535355244514292
DDX56	0.970512856471899	9.353036200902755	4.542461276803825	2.452161505287868e-5	1.770369298816066e-4	1.755738971277327	Up	3.751936130412916
BRCA2	0.934179187347894	6.814502781028285	4.541715312702365	2.4587618189189556e-5	1.7745745001592045e-4	1.7531389770734789	Up	3.75090576338944
GMIP	0.7632735522751357	7.348509612953899	4.541453708258539	2.4610805943959875e-5	1.7756878877069e-4	1.7522272294748626	Up	3.7506333677007784
GALNT16	0.5792868665712501	6.929106731882827	4.541092528596355	2.4642854684979896e-5	1.7772463376858195e-4	1.750968485574519	Up	3.750252372035428
SEMA4B	1.291436839951757	10.611381295365009	4.541035239140216	2.464794190951137e-5	1.7772463376858195e-4	1.7507688313845415	Up	3.750252372035428
TMEM171	0.557633979193243	6.085830246060226	4.540569553947502	2.468933203764236e-5	1.779109378548723e-4	1.7491459633486055	Up	3.7497973509380498
CLCN2	0.742000924514552	7.984918806392688	4.539695144240121	2.4767232396411938e-5	1.7841609256848508e-4	1.7460989626698469	Up	3.7485659762015198
EGR1	0.8872298571992783	11.990043558903707	4.539039343068144	2.482581399852709e-5	1.7875875933757567e-4	1.7438139329710871	Up	3.7477326681911065
ESPL1	1.003967907654621	9.62153029288552	4.538926585149363	2.483590004415022e-5	1.7875875933757567e-4	1.7434210640622387	Up	3.7477326681911065
EP300-AS1	0.9993070268700874	8.096373762579828	4.5389004303014735	2.483824012999489e-5	1.7875875933757567e-4	1.7433299365815236	Up	3.7477326681911065
KIAA1524	0.9424646849347188	7.141967035938502	4.538310354346584	2.4891091535640327e-5	1.790827934729293e-4	1.7412740942511773	Up	3.746946139772084
DHRS1	0.6277474565671461	9.605875673307104	4.537747017325979	2.4941650087571933e-5	1.793337562393332e-4	1.7393115404373178	Up	3.7463379548960676
PPTC7	0.723432031939506	9.971254407357964	4.536408880834713	2.506214644210832e-5	1.8008694988976012e-4	1.7346502461931772	Up	3.744517757453721
MPRIP	0.9018045369340671	10.377615069149677	4.535388586843227	2.51544020950641e-5	1.806761178921368e-4	1.7310966106248786	Up	3.743099249503913
KIAA1644	1.2898000972944308	8.19589691849122	4.535327531796168	2.5159933196570997e-5	1.806761178921368e-4	1.73088397194162	Up	3.743099249503913
RP11-65L19.4	0.8540813493983412	8.337349158060807	4.535232041653375	2.5168586216181683e-5	1.8068154503922835e-4	1.7305514078473658	Up	3.743086204367328
RNF220	0.617409013736566	9.18163482280025	4.534683454822155	2.5218353567905983e-5	1.8092527791788057e-4	1.728640911582228	Up	3.7425007515850965
LPHN1	1.02344311548781	9.133855046293805	4.532765416868867	2.5393110033326355e-5	1.8212193243024257e-4	1.7219621382183543	Up	3.739637750197043
ABHD14A-ACY1	0.6517392755203488	9.095398367923911	4.531497004546838	2.550932427806306e-5	1.8289809782444524e-4	1.7175462231402523	Up	3.737790811246617
C1orf116	1.0465006042806504	8.388070956697504	4.531125895388265	2.5543423695069517e-5	1.830852101251552e-4	1.7162543462450488	Up	3.737346737186354
SSB	1.268774569198083	10.189049616494744	4.530975166103653	2.5557286134894864e-5	1.831271999624991e-4	1.7157296546518337	Up	3.737247144959373
ELP3	0.9353729575403004	10.377852113765506	4.529705438519946	2.567435271013572e-5	1.8390842694276615e-4	1.7113100680294755	Up	3.7353983703220455
APEX2	0.6547341310402288	8.418632786184105	4.529281957091599	2.571351279843245e-5	1.841312861706842e-4	1.709836184089407	Up	3.734872413251072
RP5-1031D4.2	0.5382720686124998	6.96938496170614	4.528756955215122	2.5762141333583324e-5	1.844217870998288e-4	1.7080090680213162	Up	3.7341877738555915
WWOX	1.1723944530625534	10.147316920192782	4.527262573987262	2.5901049288624067e-5	1.8530022097386803e-4	1.7028089124049712	Up	3.732124062776762
RASL11A	2.062230489588562	8.21650031705366	4.525004411086854	2.6112336633495913e-5	1.8663672284840768e-4	1.6949526391489431	Up	3.7290028999180556
MIR6883	1.0191496245287004	8.312811663069555	4.524342559965067	2.617458045897564e-5	1.870231812370093e-4	1.6926504091419554	Up	3.7281045599909532
GATAD2A	1.0040583873029174	9.815961912198036	4.5226690187106655	2.6332613229703543e-5	1.879149331908172e-4	1.6868298264503698	Up	3.726038706090683
TCP11	0.6679293978238245	6.897623474532695	4.522586266791293	2.634045153822067e-5	1.879149331908172e-4	1.686542044064951	Up	3.726038706090683
PPP1R16A	0.9717858930989802	8.746228970688534	4.522337842172618	2.6363996092855342e-5	1.880242726335528e-4	1.6856781261464162	Up	3.725786082702445
CTB-113P19.1	0.5730888518499562	6.9104798370065685	4.521841720917205	2.6411077480420007e-5	1.8830135296806776e-4	1.6839528959109016	Up	3.725146559513579
CELA1	0.8849576065283582	7.186061679051165	4.52133482375504	2.6459265946568053e-5	1.8846872527756244e-4	1.6821902949898917	Up	3.724760706817649
EHD2	1.660297346185156	8.853757470848308	4.5194830777019686	2.6636031090524968e-5	1.8960975585566916e-4	1.6757522127221582	Up	3.7221393209785325
INTS8	0.611169936577971	9.991319331020115	4.5191840856206955	2.6664679950807783e-5	1.8970138701096867e-4	1.674712817014094	Up	3.7219294937343848
RTKN	1.0795072091710596	7.668582168561199	4.51917567492409	2.6665486281186908e-5	1.8970138701096867e-4	1.6746835791597006	Up	3.7219294937343848
PLAGL2	0.9514424972600573	8.120437319619851	4.518132326106517	2.6765695894638903e-5	1.903550998984904e-4	1.6710568368009566	Up	3.7204354832935187
THBS3	1.089770328561935	10.188713387971966	4.517984962077374	2.6779879124220994e-5	1.9039678510971168e-4	1.6705446258966896	Up	3.7203403890445053
S1PR2	0.8231870319940242	7.718072990454836	4.517686124426605	2.680866356017286e-5	1.9054222230294963e-4	1.66950594663692	Up	3.720008773891809
C1orf86	0.6156010125454596	8.638289700831564	4.516972400819467	2.6877532159612855e-5	1.9097237834775856e-4	1.6670253804614594	Up	3.719029443216329
IL17RC	1.0895438848245114	11.3729417720489	4.515233079709564	2.7046084017956903e-5	1.9205070026282928e-4	1.6609811782843495	Up	3.716584104954269
CTCFL	2.144997568428125	9.444683256991311	4.513943459100426	2.717172007127564e-5	1.9288296106444785e-4	1.6565004857883343	Up	3.7147061354588935
BCRP3	1.0301170889770477	6.070623410502076	4.5095013791324705	2.760883088722096e-5	1.9568229302005215e-4	1.6410719230513005	Up	3.70844847118207
RGS19	0.5892611295071415	8.932188070681573	4.507808361703004	2.777722096015959e-5	1.9675388184132856e-4	1.6351936994948266	Up	3.7060766905031395
ZFAT	1.1000303706939167	7.609084049118082	4.507591942133506	2.7798818234917058e-5	1.9678501311778075e-4	1.6344423654262838	Up	3.7060079799295256
KIR2DL5A	0.8104284017173811	7.089730227126112	4.506901549062463	2.7867824185164943e-5	1.9721248052347317e-4	1.632045685071447	Up	3.705065604349353
DDIT3	1.0581498331091073	10.032674277931603	4.506213492249048	2.7936762326573e-5	1.97639203855802e-4	1.6296573061455415	Up	3.7041269042347986
ISG15	1.9699302786727628	10.031695980207369	4.505300069187435	2.8028536709422375e-5	1.9822716889486073e-4	1.626486932121069	Up	3.7028368216344067
KCNA1	1.7741081149678974	7.545014729014325	4.504660020625352	2.8093018929758813e-5	1.9862181090666005e-4	1.6242656063836032	Up	3.701973062807893
OR1Q1	0.5741720610153189	7.331397411916863	4.504005535436644	2.815910473025504e-5	1.9896607693746296e-4	1.621994348430774	Up	3.701220963061286
SHB	0.8894907053729941	9.526123894277893	4.50255527939493	2.8306081477478688e-05	1.9982177243383948e-4	1.6169621453848153	Up	3.699357193123474
RAD51	1.2201718074866292	9.286895610375725	4.502552041658764	2.8306410440057422e-5	1.9982177243383948e-4	1.6169509118043797	Up	3.699357193123474
LINC00574	2.069163082288596	9.16317564497808	4.502216952382655	2.8340476506114883e-5	2.0000054348655227e-4	1.6157883160820807	Up	3.698968824171569
CILP2	0.6902872354846936	7.028117731551984	4.50176848295648	2.838613147905932e-5	2.00260962722602e-4	1.6142324177214826	Up	3.6984037003642483
CACNA1G	0.8121144056037677	7.600904410376571	4.501503833869533	2.841310676103826e-5	2.003894789105408e-4	1.6133142949678012	Up	3.6981250840575055
NIF3L1	1.093617184407023	9.138522241039093	4.5007215495416615	2.8492989623948823e-5	2.008909428678968e-4	1.6106005533120369	Up	3.697039642899151
LOC101927592	0.6589036541485065	5.3912845745759395	4.499401333510523	2.8628298782879637e-5	2.0178276273983463e-4	1.6060212893924897	Up	3.6951159360510957
PINK1	0.6472047823207276	9.187536965729176	4.498975642372655	2.8672060978933867e-5	2.0202535348416923e-4	1.6045448994277924	Up	3.694594124675509
HNRNPU	0.8055745803454002	11.799327382799865	4.498894819614456	2.8680377119479948e-5	2.0202535348416923e-4	1.604264596704856	Up	3.694594124675509
GPR6	0.9145739279792178	7.874959806541886	4.498482074960494	2.8722882461847892e-5	2.0226248933352353e-4	1.6028331914546206	Up	3.6940846520090598
ANXA7	0.8735395633314873	12.25117935408281	4.498298911489338	2.8741764648214204e-5	2.0233317950353624e-4	1.6021979996001212	Up	3.6939328938295324
C17orf99	0.6254938409443218	6.034081245459865	4.496432889477124	2.893482050616455e-5	2.0350438314188093e-4	1.5957276031589602	Up	3.6914262323658753
RGAG1	0.9271975879724516	7.790430115306656	4.496115340681288	2.896779890951699e-5	2.0367371581156703e-4	1.5946266489871954	Up	3.6910650132900993
LOC100130987	1.3970117748892656	8.411073805411808	4.495087099855601	2.90748357507825e-5	2.0436349220957076e-4	1.591061977781837	Up	3.6895966846040444
C12orf80	1.2105684521181814	8.356545334616824	4.492750903946299	2.931945800312305e-5	2.059563646464391e-4	1.582964523614936	Up	3.686224782546517
TFG	0.7995103020598506	12.307815406551915	4.491442344517522	2.9457349774822424e-5	2.067658866881418e-4	1.578429911942849	Up	3.6845211118313763
CD99P1	0.7121332766286521	7.835580780330605	4.491400101159994	2.9461811731428047e-5	2.067658866881418e-4	1.5782835356506435	Up	3.6845211118313763
SOX9-AS1	0.9057142937415684	6.9461706646339225	4.489011215080762	2.971520985695998e-5	2.0841639678644615e-4	1.570007050979549	Up	3.6810681166884924
RPRD2	1.131236062404371	11.675330339260944	4.487014321706263	2.99286523470268e-5	2.098491072778505e-4	1.563090434340146	Up	3.678092873987054
PRSS33	1.2090501439387609	9.475621498907191	4.486555966752246	2.9977854541090366e-5	2.101296979306393e-4	1.5615030642140535	Up	3.67751256379616
FAM192A	0.7338546143743656	9.826747684476908	4.486211750760999	3.001485615191963e-5	2.1030703206999923e-4	1.560311035114565	Up	3.6771462054965696
MPP7	1.223950443914469	8.56870706451314	4.485582732847627	3.0082587353567263e-5	2.106701916321596e-4	1.5581328538714532	Up	3.6763969096955607
LOC646482	1.561788041672295	8.008709243239952	4.4853001017528635	3.0113068769811424e-5	2.1081912496466205e-4	1.5571542032158971	Up	3.6760899936024485
NUP214	1.217774242483939	9.63799955344458	4.484260784781623	3.022541621093649e-5	2.115409291801823e-4	1.5535556987592374	Up	3.674605592367441
LOC101927537	1.1998505566472657	8.462814900732294	4.483803192517336	3.027500981070641e-5	2.118232261342972e-4	1.5519714823802877	Up	3.674026421806773
PLEKHF1	0.7213617066242879	8.705862966357989	4.482667801906368	3.0398404652495583e-5	2.125565709182293e-4	1.548041048880754	Up	3.6725254648233316
LOC100506538	1.1756741165531404	8.061323483427866	4.481818704017284	3.049100438703135e-5	2.1307382082189685e-4	1.5451020310126298	Up	3.6714699063205884
AP5Z1	1.274746059331057	8.124404028383122	4.481454509141304	3.0530806206303947e-5	2.132868137997032e-4	1.5438415181173817	Up	3.671035993453738
MRGPRX3	0.8315180218045057	6.623134178481331	4.481266323991835	3.0551392207396056e-5	2.1336547689652452e-4	1.5431902126985255	Up	3.6708758492332056
HINT2	1.2262402231349618	11.334139691778091	4.481037303468894	3.0576463482725296e-5	2.1345808264699816e-4	1.542397596250841	Up	3.670687395872771
LOC102724888	1.2455808276435638	6.340729598859867	4.480974775655911	3.0583311985526465e-5	2.1345808264699816e-4	1.5421811976425177	Up	3.670687395872771
LOC158960	0.601983410595679	7.898308178925751	4.4803843223978115	3.0648056291229336e-5	2.138325303816235e-4	1.5401378133433203	Up	3.6699262248028766
LINC00029	0.5911433768927861	7.05711978522156	4.480315115795865	3.0655653640968795e-5	2.138325303816235e-4	1.53989831904122	Up	3.6699262248028766
TSTA3	1.266858765096332	9.347831310848573	4.479453576494525	3.0750384903533513e-05	2.14362600916497e-4	1.5369170652702904	Up	3.668850982189958
SHANK2	0.5727324867923809	7.596896640260776	4.4788348740016195	3.081859030151132e-5	2.1472650299530688e-4	1.5347763059471573	Up	3.6681143486971513
AC009237.8	1.1233579738355406	7.2033085797475405	4.477831553543207	3.092950840845804e-5	2.1541437530505676e-4	1.5313050700633817	Up	3.6667253181812804
CXCL17	1.151319495716006	9.071989171737288	4.476319822362341	3.10973648534726e-5	2.165175321006085e-4	1.5260756369141246	Up	3.6645069317065806
ORMDL3	1.090752287273272	9.320451839339624	4.476129286552779	3.111858389063442e-5	2.1653347957233116e-4	1.5254165950013183	Up	3.664474945179424
ATG13	0.7768891150331765	9.2375519646913	4.475924536275557	3.1141401607650787e-5	2.166263689210831e-4	1.5247084033676623	Up	3.664288679844124
NDUFB1	0.7236177258981726	11.821992661654331	4.4745342284521685	3.129677047627806e-5	2.1760703825664065e-4	1.5199000501578306	Up	3.6623270619766686
OR1E1	0.8235839836874455	7.619407810192248	4.474492891855947	3.130140141188882e-5	2.1760703825664065e-4	1.5197571004114137	Up	3.6623270619766686
KIF22	0.8765225855528209	7.388324421478558	4.474116739656863	3.1343572324548574e-5	2.178340192021102e-4	1.5184563272408154	Up	3.6618742953881513
PGAP2	0.8077603556862627	9.923669851137848	4.472517133972124	3.152352365339144e-5	2.1895795942078816e-4	1.512925371327232	Up	3.6596392629875067
NAA10	0.9990700623188378	8.882167290502492	4.471741482979061	3.161114335412844e-5	2.194269868929322e-4	1.510243779834192	Up	3.658709960453519
BMP8A	1.1430474698072484	10.548071715964392	4.471552709758949	3.163250348468818e-5	2.195086585460057e-4	1.509591187639713	Up	3.6585483442847906
LINC01016	0.9314548071007708	10.996177583594068	4.4712161257176275	3.167062355820643e-5	2.1966585489550933e-4	1.50842764711894	Up	3.658237445050018
RGCC	1.2846463773638046	8.250498445368494	4.470652930887787	3.173450846495155e-5	2.1994965742793896e-4	1.5064808373059124	Up	3.6576767101011742
LOC100288181	0.6109645064234179	6.043462719477634	4.468136377018398	3.202150200018228e-5	2.2180440334912e-4	1.497783388068723	Up	3.6540298363147117
RB1CC1	1.0057547590102145	9.59596188432472	4.46667909492934	3.218884516330475e-5	2.227121573457031e-4	1.4927480686435013	Up	3.6522560751795097
LRRC55	0.7248376856638732	5.859569862097198	4.465953801681281	3.227244870880947e-5	2.2317292201218296e-4	1.490242300894166	Up	3.6513585002993407
CCSER2	1.1726212537649996	11.33596687553303	4.465909176298524	3.227759949903026e-5	2.2317292201218296e-4	1.490088134648695	Up	3.6513585002993407
OASL	0.885405703088014	7.766324158448362	4.465189948368227	3.236072512258891e-5	2.2368006951048688e-4	1.4876035477073168	Up	3.650372710973682
CECR7	0.6826904744367752	6.22771008421866	4.463920004642779	3.250800854174815e-5	2.24562417701285e-4	1.483217020343914	Up	3.6486629246135767
MYBL1	1.1860606706769836	7.240769126167425	4.462444267221297	3.267997741367329e-5	2.2561412288697383e-4	1.478120489936594	Up	3.6466337180756345
MTERF4	0.9960335169506678	8.1296313097179	4.461389966472164	3.280337689092077e-5	2.2639772545622215e-4	1.474479958989538	Up	3.6451279406762294
CCNA1	1.9396777928287845	8.874334853018816	4.460868571451882	3.286457018429062e-5	2.266832985367456e-4	1.4726797356421857	Up	3.644580476435146
GPD2	1.0068458941416765	9.37970165102237	4.4604795519287945	3.291029951692302e-5	2.2693030218435257e-4	1.471336638629185	Up	3.6441075085541237
POLR2D	0.794851329866753	7.64818005056185	4.460267454811058	3.293525761529635e-5	2.2703397378136947e-4	1.4706043956483752	Up	3.643909149318911
SAMM50	0.7141637829446736	10.173792564435107	4.458039256786589	3.319857014304507e-5	2.286424100851078e-4	1.4629128940126457	Up	3.640843210696445
SYTL1	0.7704398719871062	7.942039555600199	4.457631632209396	3.324696109759921e-5	2.2890677789707265e-4	1.46150603841767	Up	3.6403413477373516
ATP6V0D2	0.7420907783969888	8.052177736850098	4.4573450029771875	3.328102917490672e-5	2.290724026752981e-4	1.4605168211901125	Up	3.640027228958871
SRA1	0.620463524266059	9.046254566848436	4.455165518714867	3.354118925789694e-5	2.3065490502898232e-4	1.4529960727072018	Up	3.6370373053983545
GRHL1	1.573816562521512	7.928488468324294	4.454696139933595	3.3597475941699006e-5	2.309725517037655e-4	1.451376642833556	Up	3.6364396276917366
LOC613266	2.047536429802096	7.563862981925236	4.454082293837869	3.3671225256466844e-5	2.31410021821179e-4	1.449258915175542	Up	3.6356178367092964
SFN	1.5167256468818735	10.742554044449944	4.453664730351992	3.372148243676414e-5	2.3168582482604408e-4	1.4478184380087074	Up	3.635100536724275
ZNF620	0.6696650137782654	3.6885634625601624	4.451979805066235	3.3925018262881134e-5	2.329615423441368e-4	1.4420066473201816	Up	3.63271576706945
NEU1	0.7809962647223152	8.536812299536189	4.451959109613215	3.3927525638824414e-5	2.329615423441368e-4	1.4419352700415446	Up	3.63271576706945
DBR1	1.1844436783732313	11.083907540885273	4.45062072063765	3.4090062171577986e-5	2.340073604631061e-4	1.4373196281458285	Up	3.630770482084568
PKMYT1	0.9079181431625098	8.153537229684904	4.4474656259832175	3.4476221849214455e-5	2.3637443203121893e-4	1.4264417203979312	Up	3.6263995016836734
KANSL3	0.5465489743613396	10.944305244652448	4.445763120890502	3.468635706502854e-5	2.3760154589544548e-4	1.4205736540429903	Up	3.624150738052471
URB1	0.8162832977284094	8.955762116989627	4.444550769306204	3.4836751871239086e-5	2.3834630564057387e-4	1.4163957422804652	Up	3.622791575234096
OR5V1	1.24278582204375	7.663007421496788	4.444392098087494	3.4856482185413627e-05	2.384100017698291e-4	1.41584898684546	Up	3.6226755290394728
FAM230C	0.7444110084549189	4.867705409168489	4.442339930413498	3.511264339126517e-5	2.398752368315186e-4	1.4087784864978152	Up	3.620014583472435
TSPAN12	1.7599966619811465	9.425500568285836	4.441170204918696	3.52594711453357e-5	2.4080640009974192e-4	1.4047491160115202	Up	3.618331974677235
MIIP	0.7657168570517197	9.556169748988813	4.440943606439369	3.5287983390573816e-5	0.00024092920680183181	1.4039686144366668	Up	3.618110549175571
TMEM95	0.5876584149628155	9.013972237660482	4.440128245531071	3.539076331297811e-5	2.4155885257685743e-4	1.4011603405172286	Up	3.616977041991038
VWA3B	1.4875521894313142	6.773001738046486	4.4391220019241455	3.551800571039715e-5	2.4228278254268825e-4	1.3976950063169769	Up	3.615677447242532
LINC01315	0.9407754443432772	8.960225349457222	4.43626152055962	3.588215329864888e-5	2.446209133849189e-4	1.3878462812989207	Up	3.6115064165580777
ADCK2	1.7061004037258662	10.123644114228618	4.436091955823286	3.5903852838381945e-5	2.4469593359825455e-4	1.3872625712864357	Up	3.6113732477733156
NSUN5	0.5339983917415925	10.134948444318216	4.435586049961942	3.596867038519117e-5	2.450646842593177e-4	1.3855211107788792	Up	3.6107192694756725
PIGT	1.0757358853361172	9.85000241441448	4.433707758040718	3.62103160628087e-5	2.4649087212169e-4	1.379056467585765	Up	3.608199158579774
TCTN3	0.7865074262586447	10.219307184730772	4.432052358275803	3.642459265185301e-5	2.4780203844238625e-4	1.3733601822967223	Up	3.6058951253988623
FRMD4A	0.9539834540890092	9.244413664040994	4.431697074211691	3.647074120295831e-5	2.480422378069213e-4	1.3721377865509463	Up	3.605474359155383
TBC1D13	0.846319434157774	10.075905654796037	4.430876259738949	3.6577575630970494e-5	2.4869490426774856e-4	1.3693138805089715	Up	3.6043331132868413
CASC7	0.5289062758579419	6.782789563372345	4.426548367655009	3.714592400046741e-5	2.5206785540913363e-4	1.3544289635613156	Up	3.598482533571975
SLC44A2	0.95082141907616	9.324351015916628	4.4265116303775685	3.715078493114204e-5	2.5206785540913363e-4	1.354302646446178	Up	3.598482533571975
NAGA	0.6427841651929658	8.85210495178802	4.426282646887367	3.718109704262072e-5	2.521987308740348e-4	1.3535153244061773	Up	3.5982571032339536
ADAP1	0.5720520440075774	9.555685664139393	4.425444167204573	3.729229743018791e-5	2.527282206472954e-4	1.350632536523844	Up	3.597346260307669
COL23A1	1.013524319509003	7.1378935340339	4.423609170685911	3.753678509573992e-5	2.5415925013478355e-4	1.3443246337495642	Up	3.5948940795108038
UBBP1	0.9224233569634368	10.7247185577808	4.42303256885202	3.761393005923556e-5	2.5460624432699716e-4	1.3423428227911751	Up	3.5941309492938998
C21orf128	0.935909863668142	6.242718552926674	4.417202550568314	3.840263925034424e-5	2.5963770195290363e-4	1.32231253956732	Up	3.5856322434539853
FMO2	1.405203790365153	10.123841104032705	4.41704232970883	3.842453970654208e-5	2.597090233222973e-4	1.321762266846361	Up	3.585512960994477
[truncated: 4,633 more rows]
