# Supplementary material for: Identification of heme metabolism-related biomarkers in ovarian cancer and construction of a prognostic model via bulk RNA-Seq analysis
Source: Research Square preprint supplement (doi:10.21203/rs.3.rs-8411969/v1), 2026-01-08
Supplement: Supplementary file 9 [file e6752158ba868af2d7147195.xlsx]

## Sheet: Sheet1
primer	sequence
EPB42 F	TCAGGGTGCTCACAGGAGTA
EPB42 R	GCTCCTTCTGGGCTTTCTGT
SLC7A11 F	ATACTCTGCAGCTTTCCCCG
SLC7A11 R	CCAGACAGCAGTGCTCAAGA
HMBS F	CTACTTTCCAAGCGGAGCCA
HMBS R	CCCTGTGGTGGACATAGCAA
GLRX5 F	CAGATGCACCAGAATGGGGA
GLRX5 R	CTTAGCCCGAACACCAGACC
internal reference-GAPDH F	ATGGGCAGCCGTTAGGAAAG
internal reference-GAPDH R	AGGAAAAGCATCACCCGGAG
