# Supplementary material for: Identification of heme metabolism-related biomarkers in ovarian cancer and construction of a prognostic model via bulk RNA-Seq analysis
Source: Research Square preprint supplement (doi:10.21203/rs.3.rs-8411969/v1), 2026-01-08
Supplement: Supplementary file 10 [file f92a46069cb17f274893f2e0.xlsx]

## Sheet: Online Resource 10
id	p
Doramapimod_1042	4.130818983023953e-9
BMS-754807_2171	4.4185377869520626e-8
AZD1332_1463	2.724974463821938e-7
IGF1R_3801_1738	6.002052156616788e-7
JQ1_2172	8.474031639590936e-7
WZ4003_1614	1.0968322003624587e-6
NVP-ADW742_1932	1.0968322003624587e-6
JAK_8517_1739	2.784887806801121e-6
AZD1208_1449	5.227190633262215e-6
Taselisib_1561	5.378858660637475e-6
PRT062607_1631	6.304063609934761e-6
LY2109761_1852	9.274658702417059e-6
BMS-536924_1091	1.1628219285745084e-5
PRIMA-1MET_1131	3.980812771342369e-5
Cediranib_1922	8.349483301716704e-5
Alpelisib_1560	9.22660283832712e-5
SB216763_1025	1.6665091136853013e-4
Pictilisib_1058	1.6895832391764434e-4
ERK_2440_1713	2.3109483429348718e-4
Dihydrorotenone_1827	2.463536025405532e-4
PD173074_1049	2.50523369140279e-4
Selumetinib_1736	2.9799391328974134e-4
Linsitinib_1510	3.0600483678871007e-4
OSI-027_1594	4.401282029536235e-4
Erlotinib_1168	6.100203528427105e-4
GNE-317_1926	6.64269530377627e-4
Buparlisib_1873	7.435934354903996e-4
AZ6102_2109	7.435934354903996e-4
AZD8186_1918	7.719321199405657e-4
MK-2206_1053	8.163249846116926e-4
ML323_1629	0.001683988332424174
AZD5363_1916	0.002088422864378351
Vorinostat_1012	0.002112636243375636
Nelarabine_1814	0.002168060469109961
Foretinib_2040	0.0025367369590730197
GSK1904529A_1093	0.0028881905801283825
Staurosporine_1034	0.0029371722235685366
AZ960_1250	0.003158306845110092
Alisertib_1051	0.0042142601123300195
CZC24832_1615	0.0043888364783135686
Epirubicin_1511	0.004873828375844158
Uprosertib_2106	0.008312931815240452
AZD2014_1441	0.008376366804911018
Wee1 Inhibitor_1046	0.009287754077276597
MN-64_1854	0.009381242804701314
NU7441_1038	0.009523050235501955
AGI-6780_1634	0.011213782157652882
ERK_6604_1714	0.011268937896928358
EPZ004777_1237	0.012125666495799747
Temozolomide_1375	0.0134219437323372
MK-1775_1179	0.014182493611339064
Zoledronate_1802	0.017495544746835425
Nutlin-3a (-)_1047	0.018284938287723672
BPD-00008900_1998	0.019415606642407726
IWP-2_1576	0.020280050973610603
Crizotinib_1083	0.024571060266664668
Niraparib_1177	0.02462590067698419
Navitoclax_1011	0.025012760992356876
Talazoparib_1259	0.025859502137560962
Pyridostatin_2044	0.026908211152024585
PF-4708671_1129	0.02774906911512204
Ibrutinib_1799	0.02937088061200337
MK-8776_2046	0.030607027892585154
CDK9_5038_1709	0.031275394509197085
MIRA-1_1931	0.03223212220639079
LGK974_1598	0.033570573372168955
Dactolisib_1057	0.03393059971036844
ZM447439_1050	0.039657090581781275
Carmustine_1807	0.03990558259908748
Vinblastine_1004	0.04515974939496331
Uprosertib_1553	0.04618370196480024
VX-11e_2096	0.0479983888924962
Telomerase Inhibitor IX_1930	0.04967248593745583
